# Supplementary material for: Identification of putative enhancer-like elements predicts regulatory networks active in planarian adult stem cells
Source: eLife. 2022 Aug 23;11:e79675. doi: 10.7554/eLife.79675 (PMC9522251; doi:10.7554/eLife.79675)
Supplement: Supplementary file 2. — Includes the position in the genome and the identify of the predicted target gene based on proximity to the predicted transcriptional start site. [file elife-79675-supp2.xlsx]

## Sheet: Sheet1
	seqnames	start	end	width	strand	V4	V5	annotation	geneChr	geneStart	geneEnd	geneLength	geneStrand	geneId	transcriptId	distanceToTSS	X1.prop	X1	K4me1RNAi	K4me3RNAi	K4me1gene	K4me1color	K4me3color	K4me1RNAsignf	K4me1RNAlogFC	GeneDescription	GeneName	Bound motifs	Bound motif names	Bound counts	Unbound motifs	Unbound motif names	Unbound counts
0	dd_Smes_g4_1	780848	781226	379	*	k27ac_pooled_april21_peak_22	4.59145	Distal Intergenic	1	737297	772204	34908	2	MSTRG.40	MSTRG.40.1	-8644	0.810526	0.269214	-0.503473	-0.427312	0	0	0			FSCN2	fascin actin-bundling protein 2, retinal [Source:HGNC Symbol;Acc:HGNC:3960]	MSTRG.23578:MSTRG.20904:MSTRG.7427:MSTRG.12215:MSTRG.21546:MSTRG.23589:MSTRG.7450:MSTRG.5557:MSTRG.572:MSTRG.18286	Hox1:Hox4a:lhx1-3:pax6-1:pax6-2:alx4:irx-1:irx6-1:irx6-2:irx6-3	5	MSTRG.10887:MSTRG.7896:MSTRG.7998:MSTRG.23420:MSTRG.12684:MSTRG.19544:MSTRG.2221:MSTRG.2484:MSTRG.1218:MSTRG.9193:MSTRG.10604:MSTRG.11379:MSTRG.22994:MSTRG.4327:MSTRG.19528:MSTRG.2656:MSTRG.2731:MSTRG.23472:MSTRG.23309:MSTRG.9120:MSTRG.11405:MSTRG.20466:MSTRG.17923:MSTRG.22990:MSTRG.7287:MSTRG.17155:SMESG000049967.1:MSTRG.10215:MSTRG.10177:MSTRG.15979:MSTRG.12930:MSTRG.12309:MSTRG.2947:MSTRG.6445…	arnt-1:znf596:Lox5a:Lox5b:nkx5-3:creb3l-1:dbx:egr*-2:egr4-1:egr4-2:ets-3:ets-5:fli-2:fli-3:ets-1:etv4:elf1:fli-1:gata123:gata456-3:gcm-2:gli-1:gli-2:gli-3:nkx6-2:atmin:zscan2-4:cbt:klf-3:klf-1:Mef2-1:gtf2a1:Mef2-2:musculin:sall4:fir1:zfp-8:zfp236-1:zfp354:znf101:znf425:znf660:lmpt-3:nf-ya1:nf-ya2:nkx6-1:nr2f1:nr4a-1:nr4a-2:nr-1:nr2e1:tlx-2:rfx7:gtf2b-4:ctcf:zfp-10:zfp677:scratch-like:snail-1:snai…	60
1	dd_Smes_g4_1	863083	863552	470	*	k27ac_pooled_april21_peak_28	2.19864	Promoter	1	860452	863485	3034	2	MSTRG.43	MSTRG.43.1	0	0.43575	0.0335898	0.0257109	-0.0483183	0	0	0	0.526864	0.434709	SLC22A2	solute carrier family 22 member 2 [Source:HGNC Symbol;Acc:HGNC:10966]	MSTRG.7998:MSTRG.23420:MSTRG.19544:MSTRG.3741:MSTRG.7287:MSTRG.19305:MSTRG.7792:MSTRG.6856:MSTRG.17155:SMESG000049967.1:MSTRG.10177:MSTRG.5418:MSTRG.6725:MSTRG.396:MSTRG.9925:MSTRG.21308:MSTRG.14621:MSTRG.4068:MSTRG.20054:MSTRG.13724	Lox5a:Lox5b:creb3l-1:hesl-3:nkx6-2:hesl-2:nkx3-1:nkx5-2:atmin:zscan2-4:klf-3:rfx3:rfx7:klf-2:six4:prdm15:zfp112:zfp408:znf486:Lox4	14	MSTRG.10887:MSTRG.9597:MSTRG.6974:MSTRG.12684:MSTRG.20458:MSTRG.2221:MSTRG.19091:MSTRG.2484:MSTRG.1218:MSTRG.9193:MSTRG.9479:MSTRG.5625:MSTRG.2171:MSTRG.22528:MSTRG.19546:MSTRG.7741:MSTRG.3929:MSTRG.6819:MSTRG.11814:MSTRG.18451:MSTRG.12975:MSTRG.17474:MSTRG.11405:MSTRG.22990:MSTRG.23304:MSTRG.8862:MSTRG.5535:MSTRG.17691:MSTRG.16138:MSTRG.10215:MSTRG.15979:MSTRG.7427:MSTRG.1897:MSTRG.8925:MSTRG.43…	arnt-1:pax3/7-1:alx3-2:nkx5-3:rest-2:dbx:coe:egr*-2:egr4-1:egr4-2:foxA(P):foxC1:foxC2:foxD1:foxD2:foxD3:foxG:foxL1:foxO:foxK1:foxK2:foxK3:gcm-2:gli-3:fezf2:gfi1:zfp541:zfhx3:prdm14:cbt:klf-1:lhx1-3:meis-1:sall4:fir1:zfp-8:zfp236-1:zfp354:znf101:znf425:znf660:lmpt-3:smad1:smad9:nf-ya1:nf-ya2:nr2f1:nr4a-1:nr4a-2:otx-1:otx-2:pax2/5/8-1:pax6-1:pax6-2:phox:pitx:Xfin:zfp-4:zbed-1:zf-5:zfp-7:ctcf:zfp-10…	54
2	dd_Smes_g4_1	908972	909390	419	*	k27ac_pooled_april21_peak_31	7.6647	Promoter	1	898677	908511	9835	2	MSTRG.45	SMEST025332001.1	-461	4.18092	0.225398	-0.361219	-0.277458	0	0	0	0.93177	-0.0393519	CLIP1	CAP-Gly domain containing linker protein 1 [Source:HGNC Symbol;Acc:HGNC:10461]	-	-	0	MSTRG.10887:MSTRG.7896:MSTRG.21923:MSTRG.9638:MSTRG.12684:MSTRG.19544:MSTRG.5625:MSTRG.2171:MSTRG.18451:MSTRG.12975:MSTRG.17474:MSTRG.23304:MSTRG.8862:MSTRG.5535:MSTRG.17691:MSTRG.16138:MSTRG.7427:MSTRG.1897:MSTRG.372:MSTRG.4208:MSTRG.16892:MSTRG.14130:MSTRG.3824:MSTRG.3166:MSTRG.7853:MSTRG.4161:MSTRG.1496:MSTRG.16685:MSTRG.1504:MSTRG.15832:MSTRG.4837:MSTRG.9708:a:MSTRG.5349:MSTRG.6378:MSTRG.1990…	arnt-1:znf596:barhl2-1:barhl2-2:nkx5-3:creb3l-1:foxC1:foxC2:foxK1:foxK2:foxK3:fezf2:gfi1:zfp541:zfhx3:prdm14:lhx1-3:meis-1:mlx:smad1:smad9:nf-ya1:nf-ya2:onecut-1:onecut-2:onecut-3:onecut-5:hnf6:cux-2:pou1:pou4-1:pou4-2:a:znf181:zbtb24:ski-1:zfp-7:rfx3:rfx4:rfx7:gtf2b-4:ctcf:zfp-10:zfp677:smad4-1:srebp:six4:Tbx-1/10:znf333-2:znf207:zfp-2:zfp236-2:zfp560-2:znf799:zscan2-1:prdm15:zfp112:zfp408:znf48…	42
3	dd_Smes_g4_1	959652	960010	359	*	k27ac_pooled_april21_peak_33	2.94004	Promoter	1	936905	960669	23765	2	MSTRG.46	MSTRG.46.1	659	11.678	0.0758165	0.0975971	-0.00894615	0	0	0	0.359069	-0.202385	SLC2A8	solute carrier family 2 member 8 [Source:HGNC Symbol;Acc:HGNC:13812]	-	-	0	MSTRG.1217:MSTRG.4483:MSTRG.17936:MSTRG.4288:MSTRG.4289:MSTRG.22163:MSTRG.16827:MSTRG.9571:MSTRG.624:MSTRG.11386:MSTRG.22087:MSTRG.10044:MSTRG.5025:MSTRG.20458:MSTRG.2484:MSTRG.1218:MSTRG.9193:MSTRG.10604:MSTRG.22295:MSTRG.19765:MSTRG.11405:MSTRG.2271:MSTRG.7427:MSTRG.1897:MSTRG.8925:MSTRG.4330:MSTRG.14931:MSTRG.12358:MSTRG.19417:MSTRG.432:MSTRG.21315:MSTRG.6529:MSTRG.3802:MSTRG.4208:MSTRG.16892:…	egr-5:znf362:zf-4:hinfp-1:hinfp-2:rest-1:zfp674:znf-1:znf91:znf333-1:znf652:zscan2-2:zscan2-6:rest-2:egr*-2:egr4-1:egr4-2:ets-3:foxF1 :foxF2:gcm-2:egr-2:lhx1-3:meis-1:sall4:fir1:zfp-8:zfp236-1:zfp354:znf101:znf425:znf660:lmpt-3:smad1:smad9:mitfl-3:myoD:neuroD-1:fer3l-3:nkx2l-1:onecut-1:onecut-2:onecut-3:onecut-5:hnf6:cux-2:pax2/5/8-1:Pbx-4:Prep:Xfin:zfp-4:zbed-1:zf-5:pou1:a:znf181:zbtb24:ski-1:zf…	52
4	dd_Smes_g4_1	1399146	1399214	69	*	k27ac_pooled_april21_peak_51	5.7322	Intron (MSTRG.66.2/MSTRG.66, intron 5 of 7)	1	1387608	1404896	17289	2	MSTRG.66	MSTRG.66.2	5682	19.1188	0.31226	-0.314691	-0.572313	0	0	0	0.621617	-0.14839	HPRT1	hypoxanthine phosphoribosyltransferase 1 [Source:HGNC Symbol;Acc:HGNC:5157]	-	-	0	MSTRG.7896:MSTRG.20458:MSTRG.2221:MSTRG.19091:MSTRG.2484:MSTRG.1218:MSTRG.9193:MSTRG.10604:MSTRG.11379:MSTRG.22994:MSTRG.4327:MSTRG.19528:MSTRG.2656:MSTRG.2731:MSTRG.23472:MSTRG.9479:MSTRG.5625:MSTRG.2171:MSTRG.23304:MSTRG.8862:MSTRG.5535:MSTRG.17691:MSTRG.3741:MSTRG.19305:MSTRG.17848:MSTRG.9911:MSTRG.10215:MSTRG.10177:MSTRG.15979:MSTRG.12930:MSTRG.12309:MSTRG.2947:MSTRG.6445:MSTRG.4208:MSTRG.168…	znf596:rest-2:dbx:coe:egr*-2:egr4-1:egr4-2:ets-3:ets-5:fli-2:fli-3:ets-1:etv4:elf1:fli-1:foxA(P):foxC1:foxC2:fezf2:gfi1:zfp541:zfhx3:hesl-3:hesl-2:isl-1:isl-2:cbt:klf-3:klf-1:Mef2-1:gtf2a1:Mef2-2:musculin:smad1:smad9:pdp1:nf-ya1:nf-ya2:nkx3-2:nr2f1:nr4a-1:nr4a-2:hr51:otx-1:otx-2:pax6-1:pax6-2:phox:pitx:pou1:a:znf181:zbtb24:ski-1:rfx7:ctcf:zfp-10:zfp677:snail-1:snail-2:sp5:sp6-9:sp8:six3:six6-2:si…	60
5	dd_Smes_g4_1	1399542	1400136	595	*	k27ac_pooled_april21_peak_51	5.7322	Intron (MSTRG.66.2/MSTRG.66, intron 5 of 7)	1	1387608	1404896	17289	2	MSTRG.66	MSTRG.66.2	4760	19.1188	0.31226	-0.314691	-0.572313	0	0	0	0.621617	-0.14839	HPRT1	hypoxanthine phosphoribosyltransferase 1 [Source:HGNC Symbol;Acc:HGNC:5157]	-	-	0	MSTRG.7896:MSTRG.1217:MSTRG.4483:MSTRG.17936:MSTRG.12684:MSTRG.20458:MSTRG.22126:SMESG000049970.1:SMESG000031904.1:MSTRG.221:MSTRG.2221:MSTRG.19091:MSTRG.2484:MSTRG.1218:MSTRG.9193:MSTRG.10604:MSTRG.11379:MSTRG.22994:MSTRG.4327:MSTRG.19528:MSTRG.2656:MSTRG.2731:MSTRG.23472:MSTRG.9479:MSTRG.5625:MSTRG.2171:MSTRG.23304:MSTRG.8862:MSTRG.5535:MSTRG.17691:MSTRG.3741:MSTRG.4403:MSTRG.19305:MSTRG.10592:…	znf596:egr-5:znf362:zf-4:nkx5-3:rest-2:zfp560-1:zscan2-5:zscan2-8:zf-6:dbx:coe:egr*-2:egr4-1:egr4-2:ets-3:ets-5:fli-2:fli-3:ets-1:etv4:elf1:fli-1:foxA(P):foxC1:foxC2:fezf2:gfi1:zfp541:zfhx3:hesl-3:hnf4:hesl-2:nkx5-1:isl-1:isl-2:cbt:klf-3:klf-1:Mef2-1:gtf2a1:Mef2-2:musculin:smad1:smad9:pdp1:nf-ya1:nf-ya2:nkx3-2:nr2f1:nr4a-1:nr4a-2:hr51:otx-1:otx-2:pax6-1:pax6-2:phox:pitx:pou1:a:znf181:zbtb24:ski-1…	68
6	dd_Smes_g4_1	1545689	1546133	445	*	k27ac_pooled_april21_peak_59	4.2356	Intron (MSTRG.73.1/MSTRG.73, intron 7 of 10)	1	1529276	1563536	34261	1	MSTRG.73	MSTRG.73.5	16413	5.13121	0.065902	-0.213364	-0.289906	1	1	1	1.32598e-08	-0.980819	ICAM5	intercellular adhesion molecule 5 [Source:HGNC Symbol;Acc:HGNC:5348]	-	-	0	MSTRG.7896:MSTRG.1217:MSTRG.4483:MSTRG.17936:MSTRG.12684:MSTRG.23304:MSTRG.8862:MSTRG.5535:MSTRG.17691:MSTRG.16138:MSTRG.7792:MSTRG.6856:MSTRG.10592:MSTRG.7427:MSTRG.20979:MSTRG.6445:MSTRG.2717:MSTRG.11214:MSTRG.14130:MSTRG.3824:MSTRG.23136:MSTRG.3166:MSTRG.7853:MSTRG.4161:MSTRG.1496:MSTRG.16685:MSTRG.1504:MSTRG.2111:MSTRG.12215:MSTRG.21546:MSTRG.15991:MSTRG.3565:MSTRG.7049:MSTRG.19418:MSTRG.2093…	znf596:egr-5:znf362:zf-4:nkx5-3:fezf2:gfi1:zfp541:zfhx3:prdm14:nkx3-1:nkx5-2:nkx5-1:lhx1-3:lhx3:musculin:mitfl-3:myoD:nf-ya1:nf-ya2:hr51:onecut-1:onecut-2:onecut-3:onecut-5:hnf6:cux-2:pax2/5/8-1:pax6-1:pax6-2:phox:Xfin:zfp-4:zbed-1:zf-5:pou4-1:pou4-2:kdm5b:rx:tal:ptf-4:da:ap4-1:ptf-5:yy2:zbed8:rreb1:zfp-6:zf-2:zf-8:zeb-1:znf143:egr-1:ovo-1:prdm13:gl:znf341:zfp-2:zfp236-2:zfp560-2:znf799:zscan2-1:…	42
7	dd_Smes_g4_1	2151011	2151414	404	*	k27ac_pooled_april21_peak_80	5.50092	Promoter	1	2150434	2151645	1212	1	MSTRG.96	SMEST026493001.1	577	11.5514	0.247558	0.129659	0.0906384	0	0	0	0.479784	-0.177969	SPR	sepiapterin reductase [Source:HGNC Symbol;Acc:HGNC:11257]	MSTRG.21923:MSTRG.9638:SMESG000022963.1:MSTRG.10604:MSTRG.13843:MSTRG.14619:MSTRG.15672:MSTRG.19125:MSTRG.2385:MSTRG.22069:MSTRG.1684:SMESG000061747.1:MSTRG.4514:MSTRG.3909	barhl2-1:barhl2-2:barhl1:ets-3:Hox4b:zfp-7:rfx4:prdm1-1:zfp-3:zfp878:zbed1:zscan2-7:ikzf1:zfp362	8	MSTRG.10887:MSTRG.7998:MSTRG.23420:MSTRG.1217:MSTRG.4483:MSTRG.17936:MSTRG.12684:MSTRG.19544:MSTRG.20458:MSTRG.2221:MSTRG.2484:MSTRG.1218:MSTRG.9193:MSTRG.11379:MSTRG.22994:MSTRG.4327:MSTRG.19528:MSTRG.2656:MSTRG.2731:MSTRG.23472:MSTRG.13758:MSTRG.18451:MSTRG.12975:MSTRG.17474:MSTRG.11405:MSTRG.22990:MSTRG.3741:MSTRG.7287:MSTRG.4403:MSTRG.19305:MSTRG.12851:MSTRG.17155:SMESG000049967.1:MSTRG.10215…	arnt-1:Lox5a:Lox5b:egr-5:znf362:zf-4:nkx5-3:creb3l-1:rest-2:dbx:egr*-2:egr4-1:egr4-2:ets-5:fli-2:fli-3:ets-1:etv4:elf1:fli-1:foxN(P):foxK1:foxK2:foxK3:gcm-2:gli-3:hesl-3:nkx6-2:hnf4:hesl-2:nerfin2-1:atmin:zscan2-4:cbt:klf-1:lhx2-3:lmx1-1:lhx1-3:lhx3:meis-1:musculin:msx:sall4:fir1:zfp-8:zfp236-1:zfp354:znf101:znf425:znf660:lmpt-3:myoD:nkx6-1:nr2f1:nr4a-1:nr4a-2:pax2/5/8-1:pax6-1:pax6-2:Pbx-4:Prep:…	77
8	dd_Smes_g4_1	2159721	2160064	344	*	k27ac_pooled_april21_peak_86	3.13277	Intron (MSTRG.98.1/MSTRG.98, intron 2 of 7)	1	2152048	2164616	12569	2	MSTRG.98	MSTRG.98.1	4552	1.54939	0.0734976	-0.590921	-0.338241	0	0	0	0.115641	-0.506864	MAGI1	membrane associated guanylate kinase, WW and PDZ domain containing 1 [Source:HGNC Symbol;Acc:HGNC:946]	MSTRG.2221	dbx	1	MSTRG.7896:MSTRG.6974:MSTRG.1217:MSTRG.4483:MSTRG.17936:MSTRG.4288:MSTRG.4289:MSTRG.22163:MSTRG.16827:MSTRG.9571:MSTRG.624:MSTRG.11386:MSTRG.22087:MSTRG.10044:MSTRG.5025:MSTRG.14008:MSTRG.19091:MSTRG.10604:MSTRG.2656:MSTRG.2731:MSTRG.13758:MSTRG.11405:MSTRG.20466:MSTRG.17923:MSTRG.22990:MSTRG.16138:MSTRG.4403:MSTRG.13843:MSTRG.19305:MSTRG.10592:MSTRG.10215:MSTRG.15979:MSTRG.2271:MSTRG.18888:MSTRG…	znf596:alx3-2:egr-5:znf362:zf-4:hinfp-1:hinfp-2:rest-1:zfp674:znf-1:znf91:znf333-1:znf652:zscan2-2:zscan2-6:dll-1:coe:ets-3:etv4:elf1:foxN(P):gcm-2:gli-1:gli-2:gli-3:prdm14:hnf4:Hox4b:hesl-2:nkx5-1:cbt:klf-1:egr-2:lbx:lhx1-3:lhx3:mlx:smad1:smad9:myoD:a:phox:Xfin:zfp-4:zbed-1:zf-5:zfp-7:ctcf:zfp-10:zfp677:rx:sp5:Tbx-1/10:Tbx-20:Tbx-2/3a:Tbx-2/3c:ap4-1:yy2:zbed8:znf333-2:znf207:zeb-1:znf143:zic-1:z…	50
9	dd_Smes_g4_1	2343324	2343543	220	*	k27ac_pooled_april21_peak_90	3.40994	Intron (MSTRG.104.1/MSTRG.104, intron 5 of 5)	1	2340351	2347519	7169	2	MSTRG.104	MSTRG.104.3	3976	9.62576	0.268466	-0.276905	-0.689188	1	1	1	6.39924e-06	-0.771385	RNF150	ring finger protein 150 [Source:HGNC Symbol;Acc:HGNC:23138]	MSTRG.7450:MSTRG.5557:MSTRG.572:MSTRG.18286	irx-1:irx6-1:irx6-2:irx6-3	1	MSTRG.10887:MSTRG.6974:MSTRG.7998:MSTRG.23420:MSTRG.5414:MSTRG.12684:MSTRG.4288:MSTRG.4289:MSTRG.22163:MSTRG.16827:MSTRG.9571:MSTRG.624:MSTRG.11386:MSTRG.22087:MSTRG.10044:MSTRG.5025:MSTRG.20458:MSTRG.14008:MSTRG.2484:MSTRG.1218:MSTRG.9193:MSTRG.10604:MSTRG.11379:MSTRG.22994:MSTRG.4327:MSTRG.9479:MSTRG.10087:MSTRG.20250:MSTRG.18815:MSTRG.21195:SMESG000072873.1:MSTRG.19883:MSTRG.3843:MSTRG.5337:MS…	arnt-1:alx3-2:Lox5a:Lox5b:tlx-1:nkx5-3:hinfp-1:hinfp-2:rest-1:zfp674:znf-1:znf91:znf333-1:znf652:zscan2-2:zscan2-6:rest-2:dll-1:egr*-2:egr4-1:egr4-2:ets-3:ets-5:fli-2:fli-3:foxA(P):pou-p1:foxP:foxQ/D:foxJ1-1:foxJ1-2:foxJ1-3:foxJ1-4:foxJ1-5:foxN2/3-1:foxN2/3-2:foxN2/3-3:foxK1:foxK2:foxK3:gli-1:gli-2:fezf2:gfi1:zfp541:zfhx3:prdm14:nkx6-2:hnf4:nerfin2-1:lhx1-3:lhx3:Mef2-1:gtf2a1:Mef2-2:meis-1:mlx:mu…	72
10	dd_Smes_g4_1	2349136	2349358	223	*	k27ac_pooled_april21_peak_92	2.09074	Intron (MSTRG.104.1/MSTRG.104, intron 2 of 5)	1	2340351	2347519	7169	2	MSTRG.104	MSTRG.104.3	-1617	9.62576	0.268466	0.128281	-0.0400513	1	0	1	6.39924e-06	-0.771385	RNF150	ring finger protein 150 [Source:HGNC Symbol;Acc:HGNC:23138]	-	-	0	MSTRG.7998:MSTRG.23420:MSTRG.12684:MSTRG.4288:MSTRG.4289:MSTRG.22163:MSTRG.16827:MSTRG.9571:MSTRG.624:MSTRG.11386:MSTRG.22087:MSTRG.10044:MSTRG.5025:MSTRG.2221:MSTRG.14008:MSTRG.19091:MSTRG.2484:MSTRG.1218:MSTRG.9193:MSTRG.10604:MSTRG.5081:MSTRG.11379:MSTRG.22994:MSTRG.4327:MSTRG.19528:MSTRG.23472:MSTRG.11405:MSTRG.20466:MSTRG.17923:MSTRG.22990:MSTRG.12700:MSTRG.8018:MSTRG.11935:MSTRG.23304:MSTRG…	Lox5a:Lox5b:nkx5-3:hinfp-1:hinfp-2:rest-1:zfp674:znf-1:znf91:znf333-1:znf652:zscan2-2:zscan2-6:dbx:dll-1:coe:egr*-2:egr4-1:egr4-2:ets-3:emx1:ets-5:fli-2:fli-3:ets-1:fli-1:gcm-2:gli-1:gli-2:gli-3:gata456-1:gata456-2:gata456-4:fezf2:gfi1:zfp541:zfhx3:prdm14:nkx6-2:hnf4:Hox4b:hesl-2:nkx3-1:nkx5-2:nkx5-1:nerfin2-1:atmin:zscan2-4:cbt:klf-3:klf-1:lhx2-1:lhx2-4:lhx2-3:lmx1-1:lhx1-3:lhx3:meox:sall4:fir1:…	84
11	dd_Smes_g4_1	2351478	2352061	584	*	k27ac_pooled_april21_peak_93	6.8361	Intron (MSTRG.104.1/MSTRG.104, intron 2 of 5)	1	2340230	2354524	14295	2	MSTRG.104	MSTRG.104.1	2463	9.62576	0.268466	-0.241266	0.228003	1	1	0	6.39924e-06	-0.771385	RNF150	ring finger protein 150 [Source:HGNC Symbol;Acc:HGNC:23138]	MSTRG.2484:MSTRG.1218:MSTRG.9193:MSTRG.20466:MSTRG.17923:MSTRG.4403:MSTRG.12851:MSTRG.15979:MSTRG.1897:MSTRG.18823:MSTRG.8332:a:MSTRG.9925:MSTRG.11197:MSTRG.22732:MSTRG.308:MSTRG.1201:MSTRG.8933:MSTRG.21308:MSTRG.14621:MSTRG.4068:MSTRG.20054:MSTRG.5364:MSTRG.18607:MSTRG.23026:MSTRG.22628	egr*-2:egr4-1:egr4-2:gli-1:gli-2:hnf4:nerfin2-1:klf-1:meis-1:nr4a-1:nr4a-2:a:six4:egr-1:ovo-1:prdm13:gl:znf341:prdm15:zfp112:zfp408:znf486:hb-1:hb-2:meis-2:tead1	14	MSTRG.7896:MSTRG.7998:MSTRG.23420:MSTRG.21923:MSTRG.9638:MSTRG.1217:MSTRG.4483:MSTRG.17936:MSTRG.4288:MSTRG.4289:MSTRG.22163:MSTRG.16827:MSTRG.9571:MSTRG.624:MSTRG.11386:MSTRG.22087:MSTRG.10044:MSTRG.5025:MSTRG.22126:SMESG000049970.1:SMESG000031904.1:MSTRG.221:MSTRG.2221:MSTRG.11379:MSTRG.22994:MSTRG.4327:MSTRG.10087:MSTRG.20250:MSTRG.23309:MSTRG.9120:MSTRG.11405:MSTRG.22990:MSTRG.3741:MSTRG.7287…	znf596:Lox5a:Lox5b:barhl2-1:barhl2-2:egr-5:znf362:zf-4:hinfp-1:hinfp-2:rest-1:zfp674:znf-1:znf91:znf333-1:znf652:zscan2-2:zscan2-6:zfp560-1:zscan2-5:zscan2-8:zf-6:dbx:ets-5:fli-2:fli-3:pou-p1:foxP:gata123:gata456-3:gcm-2:gli-3:hesl-3:nkx6-2:hesl-2:nkx3-1:nkx5-2:nkx5-1:atmin:zscan2-4:egr-2:lbx:lhx1-3:lhx3:musculin:sall4:fir1:zfp-8:zfp236-1:zfp354:znf101:znf425:znf660:lmpt-3:smad1:smad9:mitfl-3:myo…	54
12	dd_Smes_g4_1	2542195	2542448	254	*	k27ac_pooled_april21_peak_113	10.1895	Distal Intergenic	1	2538492	2541155	2664	1	MSTRG.114	SMEST026549002.1	3703	1.57376	0.156414	-0.279567	-0.513985	0	0	0	0.620596	-0.32929	GCNT3	glucosaminyl (N-acetyl) transferase 3, mucin type [Source:HGNC Symbol;Acc:HGNC:4205]	-	-	0	MSTRG.7896:MSTRG.7998:MSTRG.23420:MSTRG.10410:MSTRG.1217:MSTRG.4483:MSTRG.17936:MSTRG.4288:MSTRG.4289:MSTRG.22163:MSTRG.16827:MSTRG.9571:MSTRG.624:MSTRG.11386:MSTRG.22087:MSTRG.10044:MSTRG.5025:MSTRG.19091:MSTRG.2484:MSTRG.1218:MSTRG.9193:MSTRG.10604:MSTRG.2731:MSTRG.7287:MSTRG.13843:MSTRG.12851:MSTRG.17155:SMESG000049967.1:MSTRG.10215:MSTRG.15979:MSTRG.18888:MSTRG.7427:MSTRG.20979:MSTRG.12930:MS…	znf596:Lox5a:Lox5b:bsx:egr-5:znf362:zf-4:hinfp-1:hinfp-2:rest-1:zfp674:znf-1:znf91:znf333-1:znf652:zscan2-2:zscan2-6:coe:egr*-2:egr4-1:egr4-2:ets-3:elf1:nkx6-2:Hox4b:nerfin2-1:atmin:zscan2-4:cbt:klf-1:lbx:lhx1-3:lhx3:Mef2-1:gtf2a1:Mef2-2:meis-1:musculin:sall4:fir1:zfp-8:zfp236-1:zfp354:znf101:znf425:znf660:lmpt-3:smad1:smad9:mitfl-3:myoD:nf-ya1:nf-ya2:onecut-1:onecut-2:onecut-3:onecut-5:hnf6:cux-…	67
13	dd_Smes_g4_1	2597700	2597936	237	*	k27ac_pooled_april21_peak_121	6.91134	Distal Intergenic	1	2601522	2611313	9792	1	MSTRG.118	SMEST026559001.1	-3586	0.0671881	0.0445275	-0.411098	-0.271554	0	0	0	0.242019	0.999267	PXDN	peroxidasin [Source:HGNC Symbol;Acc:HGNC:14966]	MSTRG.2111:MSTRG.3339	pax2/5/8-1:onecut-4	2	MSTRG.7896:MSTRG.23513:MSTRG.10410:SMESG000022963.1:MSTRG.5414:MSTRG.12684:MSTRG.4288:MSTRG.4289:MSTRG.22163:MSTRG.16827:MSTRG.9571:MSTRG.624:MSTRG.11386:MSTRG.22087:MSTRG.10044:MSTRG.5025:MSTRG.2221:MSTRG.14008:MSTRG.19091:MSTRG.2484:MSTRG.1218:MSTRG.9193:MSTRG.5081:MSTRG.11379:MSTRG.22994:MSTRG.4327:MSTRG.19528:MSTRG.2656:MSTRG.23472:MSTRG.9479:MSTRG.22528:MSTRG.19546:MSTRG.7741:MSTRG.3929:MSTR…	znf596:e22/23:bsx:barhl1:tlx-1:nkx5-3:hinfp-1:hinfp-2:rest-1:zfp674:znf-1:znf91:znf333-1:znf652:zscan2-2:zscan2-6:dbx:dll-1:coe:egr*-2:egr4-1:egr4-2:emx1:ets-5:fli-2:fli-3:ets-1:etv4:fli-1:foxA(P):foxD1:foxD2:foxD3:foxG:foxL1:foxO:pou-p1:foxP:gcm-2:gli-3:fezf2:gfi1:zfp541:zfhx3:prdm14:hnf4:Hox1:Hox4a:Hox3a:cbt:klf-1:egr-2:lhx2-1:lhx2-4:lhx2-3:lmx1-1:lhx1-3:Mef2-1:gtf2a1:meox:msx:neuroD-1:fer3l-3:…	78
14	dd_Smes_g4_1	2597700	2597936	237	*	k27ac_pooled_april21_peak_122	3.6245	Distal Intergenic	1	2601522	2611313	9792	1	MSTRG.118	SMEST026559001.1	-3586	0.0671881	0.0445275	-0.411098	-0.271554	0	0	0	0.242019	0.999267	PXDN	peroxidasin [Source:HGNC Symbol;Acc:HGNC:14966]	MSTRG.2111:MSTRG.3339	pax2/5/8-1:onecut-4	2	MSTRG.7896:MSTRG.23513:MSTRG.10410:SMESG000022963.1:MSTRG.5414:MSTRG.12684:MSTRG.4288:MSTRG.4289:MSTRG.22163:MSTRG.16827:MSTRG.9571:MSTRG.624:MSTRG.11386:MSTRG.22087:MSTRG.10044:MSTRG.5025:MSTRG.2221:MSTRG.14008:MSTRG.19091:MSTRG.2484:MSTRG.1218:MSTRG.9193:MSTRG.5081:MSTRG.11379:MSTRG.22994:MSTRG.4327:MSTRG.19528:MSTRG.2656:MSTRG.23472:MSTRG.9479:MSTRG.22528:MSTRG.19546:MSTRG.7741:MSTRG.3929:MSTR…	znf596:e22/23:bsx:barhl1:tlx-1:nkx5-3:hinfp-1:hinfp-2:rest-1:zfp674:znf-1:znf91:znf333-1:znf652:zscan2-2:zscan2-6:dbx:dll-1:coe:egr*-2:egr4-1:egr4-2:emx1:ets-5:fli-2:fli-3:ets-1:etv4:fli-1:foxA(P):foxD1:foxD2:foxD3:foxG:foxL1:foxO:pou-p1:foxP:gcm-2:gli-3:fezf2:gfi1:zfp541:zfhx3:prdm14:hnf4:Hox1:Hox4a:Hox3a:cbt:klf-1:egr-2:lhx2-1:lhx2-4:lhx2-3:lmx1-1:lhx1-3:Mef2-1:gtf2a1:meox:msx:neuroD-1:fer3l-3:…	78
15	dd_Smes_g4_1	2599081	2599281	201	*	k27ac_pooled_april21_peak_123	6.94623	Distal Intergenic	1	2601522	2611313	9792	1	MSTRG.118	SMEST026559001.1	-2241	0.0671881	0.0445275	-0.464599	-0.428133	0	0	0	0.242019	0.999267	PXDN	peroxidasin [Source:HGNC Symbol;Acc:HGNC:14966]	MSTRG.2111:MSTRG.3339	pax2/5/8-1:onecut-4	2	MSTRG.10887:MSTRG.7896:SMESG000022963.1:MSTRG.5414:MSTRG.12684:MSTRG.19544:MSTRG.2484:MSTRG.1218:MSTRG.9193:MSTRG.10604:MSTRG.11379:MSTRG.22994:MSTRG.4327:MSTRG.19528:MSTRG.2656:MSTRG.2731:MSTRG.23472:MSTRG.22295:MSTRG.19765:MSTRG.10087:MSTRG.20250:MSTRG.18815:MSTRG.21195:SMESG000072873.1:MSTRG.19883:MSTRG.3843:MSTRG.5337:MSTRG.14880:MSTRG.5693:MSTRG.10837:MSTRG.11405:MSTRG.22990:MSTRG.12700:MSTR…	arnt-1:znf596:barhl1:tlx-1:nkx5-3:creb3l-1:egr*-2:egr4-1:egr4-2:ets-3:ets-5:fli-2:fli-3:ets-1:etv4:elf1:fli-1:foxF1 :foxF2:pou-p1:foxP:foxQ/D:foxJ1-1:foxJ1-2:foxJ1-3:foxJ1-4:foxJ1-5:foxN2/3-1:foxN2/3-2:foxN2/3-3:gcm-2:gli-3:gata456-1:gata456-2:gata456-4:fezf2:gfi1:zfp541:zfhx3:hesl-3:Hox4b:hesl-2:nkx3-1:nkx5-2:nkx5-1:isl-1:isl-2:cbt:klf-3:klf-1:egr-2:lhx2-3:lhx1-3:Mef2-1:gtf2a1:meis-1:msx:sall4:f…	79
16	dd_Smes_g4_1	2599081	2599281	201	*	k27ac_pooled_april21_peak_124	4.39532	Distal Intergenic	1	2601522	2611313	9792	1	MSTRG.118	SMEST026559001.1	-2241	0.0671881	0.0445275	-0.464599	-0.428133	0	0	0	0.242019	0.999267	PXDN	peroxidasin [Source:HGNC Symbol;Acc:HGNC:14966]	MSTRG.2111:MSTRG.3339	pax2/5/8-1:onecut-4	2	MSTRG.10887:MSTRG.7896:SMESG000022963.1:MSTRG.5414:MSTRG.12684:MSTRG.19544:MSTRG.2484:MSTRG.1218:MSTRG.9193:MSTRG.10604:MSTRG.11379:MSTRG.22994:MSTRG.4327:MSTRG.19528:MSTRG.2656:MSTRG.2731:MSTRG.23472:MSTRG.22295:MSTRG.19765:MSTRG.10087:MSTRG.20250:MSTRG.18815:MSTRG.21195:SMESG000072873.1:MSTRG.19883:MSTRG.3843:MSTRG.5337:MSTRG.14880:MSTRG.5693:MSTRG.10837:MSTRG.11405:MSTRG.22990:MSTRG.12700:MSTR…	arnt-1:znf596:barhl1:tlx-1:nkx5-3:creb3l-1:egr*-2:egr4-1:egr4-2:ets-3:ets-5:fli-2:fli-3:ets-1:etv4:elf1:fli-1:foxF1 :foxF2:pou-p1:foxP:foxQ/D:foxJ1-1:foxJ1-2:foxJ1-3:foxJ1-4:foxJ1-5:foxN2/3-1:foxN2/3-2:foxN2/3-3:gcm-2:gli-3:gata456-1:gata456-2:gata456-4:fezf2:gfi1:zfp541:zfhx3:hesl-3:Hox4b:hesl-2:nkx3-1:nkx5-2:nkx5-1:isl-1:isl-2:cbt:klf-3:klf-1:egr-2:lhx2-3:lhx1-3:Mef2-1:gtf2a1:meis-1:msx:sall4:f…	79
17	dd_Smes_g4_1	2641498	2641880	383	*	k27ac_pooled_april21_peak_142	4.93292	Intron (SMEST026563004.1/MSTRG.119, intron 6 of 11)	1	2613254	2654254	41001	2	MSTRG.119	SMEST026563004.1	12374	0.410051	0.731857	0.571623	0.179825	0	0	0	0.416293	0.535379	YME1L1	YME1 like 1 ATPase [Source:HGNC Symbol;Acc:HGNC:12843]	MSTRG.11405:MSTRG.20466:MSTRG.17923:MSTRG.4403:MSTRG.19305:MSTRG.17848:MSTRG.9911:MSTRG.8925:MSTRG.4330:MSTRG.14931:MSTRG.12358:MSTRG.19417:MSTRG.432:MSTRG.21315:MSTRG.6529:MSTRG.3802:MSTRG.11214:MSTRG.2111:MSTRG.9898:MSTRG.15425:MSTRG.19918:MSTRG.20330:MSTRG.21518:MSTRG.10142:MSTRG.10139	gcm-2:gli-1:gli-2:hnf4:hesl-2:isl-1:isl-2:sall4:fir1:zfp-8:zfp236-1:zfp354:znf101:znf425:znf660:lmpt-3:myoD:pax2/5/8-1:smad4-1:sp6-9:sp8:znf333-2:znf207:osr-1:osr-2	13	MSTRG.10887:MSTRG.9597:MSTRG.10410:SMESG000022963.1:MSTRG.4288:MSTRG.4289:MSTRG.22163:MSTRG.16827:MSTRG.9571:MSTRG.624:MSTRG.11386:MSTRG.22087:MSTRG.10044:MSTRG.5025:MSTRG.20458:MSTRG.14008:MSTRG.19091:MSTRG.2484:MSTRG.1218:MSTRG.9193:MSTRG.10604:MSTRG.5081:MSTRG.11379:MSTRG.22994:MSTRG.4327:MSTRG.19528:MSTRG.2656:MSTRG.2731:MSTRG.23472:MSTRG.9479:MSTRG.5625:MSTRG.2171:MSTRG.10087:MSTRG.20250:MST…	arnt-1:pax3/7-1:bsx:barhl1:hinfp-1:hinfp-2:rest-1:zfp674:znf-1:znf91:znf333-1:znf652:zscan2-2:zscan2-6:rest-2:dll-1:coe:egr*-2:egr4-1:egr4-2:ets-3:emx1:ets-5:fli-2:fli-3:ets-1:etv4:elf1:fli-1:foxA(P):foxC1:foxC2:pou-p1:foxP:foxN(P):foxK1:foxK2:foxK3:gata123:gata456-3:gata456-1:gata456-2:gata456-4:prdm14:nerfin2-1:atmin:zscan2-4:cbt:klf-3:klf-1:egr-2:lhx2-1:lhx2-4:lhx2-3:lhx1-1:lhx1-4:lhx1-3:meis-…	68
18	dd_Smes_g4_1	2910166	2910438	273	*	k27ac_pooled_april21_peak_166	2.36525	Intron (MSTRG.132.1/MSTRG.132, intron 2 of 6)	1	2907989	2913300	5312	1	MSTRG.132	MSTRG.132.4	2177	9.71304	0.215743	-0.290724	-0.320886	0	0	0	0.121187	-0.290287	CCNYL1	cyclin Y like 1 [Source:HGNC Symbol;Acc:HGNC:26868]	MSTRG.2484:MSTRG.1218:MSTRG.9193:MSTRG.12700:MSTRG.8018:MSTRG.11935:MSTRG.23304:MSTRG.8862:MSTRG.5535:MSTRG.17691:MSTRG.10215:MSTRG.10177:MSTRG.15979:MSTRG.4208:MSTRG.16892:MSTRG.5349:MSTRG.6378:MSTRG.19902:MSTRG.9898:MSTRG.396:MSTRG.11197:MSTRG.22732:MSTRG.308:MSTRG.1201:MSTRG.8933:MSTRG.21308:MSTRG.14621:MSTRG.4068:MSTRG.20054:MSTRG.19125:MSTRG.2385:MSTRG.22069:MSTRG.1684:SMESG000061747.1:MSTRG…	egr*-2:egr4-1:egr4-2:gata456-1:gata456-2:gata456-4:fezf2:gfi1:zfp541:zfhx3:cbt:klf-3:klf-1:smad1:smad9:znf181:zbtb24:ski-1:smad4-1:klf-2:egr-1:ovo-1:prdm13:gl:znf341:prdm15:zfp112:zfp408:znf486:prdm1-1:zfp-3:zfp878:zbed1:zscan2-7:ikzf1:zfp362:rxra	15	MSTRG.10887:MSTRG.7896:SMESG000022963.1:MSTRG.12684:MSTRG.19544:MSTRG.4288:MSTRG.4289:MSTRG.22163:MSTRG.16827:MSTRG.9571:MSTRG.624:MSTRG.11386:MSTRG.22087:MSTRG.10044:MSTRG.5025:MSTRG.20458:MSTRG.14008:MSTRG.19091:MSTRG.10604:MSTRG.5081:MSTRG.11379:MSTRG.22994:MSTRG.4327:MSTRG.19528:MSTRG.2656:MSTRG.2731:MSTRG.23472:MSTRG.5625:MSTRG.2171:MSTRG.10087:MSTRG.20250:MSTRG.11405:MSTRG.20466:MSTRG.17923…	arnt-1:znf596:barhl1:nkx5-3:creb3l-1:hinfp-1:hinfp-2:rest-1:zfp674:znf-1:znf91:znf333-1:znf652:zscan2-2:zscan2-6:rest-2:dll-1:coe:ets-3:emx1:ets-5:fli-2:fli-3:ets-1:etv4:elf1:fli-1:foxC1:foxC2:pou-p1:foxP:gcm-2:gli-1:gli-2:gli-3:Hox4b:hesl-2:Hox1:Hox4a:Hox3a:nerfin2-1:atmin:zscan2-4:lhx1-3:meis-1:meox:msx:sall4:fir1:zfp-8:zfp236-1:zfp354:znf101:znf425:znf660:lmpt-3:myoD:nf-ya1:nf-ya2:onecut-1:one…	68
19	dd_Smes_g4_1	2911452	2911493	42	*	k27ac_pooled_april21_peak_167	6.19022	Intron (MSTRG.132.1/MSTRG.132, intron 5 of 6)	1	2907989	2913300	5312	1	MSTRG.132	MSTRG.132.4	3463	9.71304	0.215743	-0.219607	-0.462878	0	0	0	0.121187	-0.290287	CCNYL1	cyclin Y like 1 [Source:HGNC Symbol;Acc:HGNC:26868]	MSTRG.9597:MSTRG.12684:MSTRG.4288:MSTRG.4289:MSTRG.22163:MSTRG.16827:MSTRG.9571:MSTRG.624:MSTRG.11386:MSTRG.22087:MSTRG.10044:MSTRG.5025:MSTRG.20458:MSTRG.2484:MSTRG.1218:MSTRG.9193:MSTRG.20466:MSTRG.17923:MSTRG.23304:MSTRG.8862:MSTRG.5535:MSTRG.17691:MSTRG.7427:MSTRG.8925:MSTRG.4330:MSTRG.14931:MSTRG.12358:MSTRG.19417:MSTRG.432:MSTRG.21315:MSTRG.6529:MSTRG.3802:MSTRG.11214:MSTRG.14130:MSTRG.3824…	pax3/7-1:nkx5-3:hinfp-1:hinfp-2:rest-1:zfp674:znf-1:znf91:znf333-1:znf652:zscan2-2:zscan2-6:rest-2:egr*-2:egr4-1:egr4-2:gli-1:gli-2:fezf2:gfi1:zfp541:zfhx3:lhx1-3:sall4:fir1:zfp-8:zfp236-1:zfp354:znf101:znf425:znf660:lmpt-3:myoD:nf-ya1:nf-ya2:nr2f1:onecut-1:onecut-2:onecut-3:onecut-5:hnf6:cux-2:da:ap4-1:yy2:zbed8:zeb-1:egr-1:ovo-1:prdm13:gl:znf341:alx4:egr4-3:arx:nkx1:nkx1-1:nkx1-2:rxra	23	MSTRG.10887:MSTRG.7896:MSTRG.6974:MSTRG.5414:MSTRG.19544:MSTRG.2221:MSTRG.14008:MSTRG.10604:MSTRG.5081:MSTRG.11379:MSTRG.22994:MSTRG.4327:MSTRG.19528:MSTRG.2656:MSTRG.23472:MSTRG.22528:MSTRG.19546:MSTRG.7741:MSTRG.22295:MSTRG.19765:MSTRG.6819:MSTRG.11814:MSTRG.10087:MSTRG.20250:MSTRG.13758:MSTRG.11405:MSTRG.22990:MSTRG.3741:MSTRG.4403:MSTRG.13843:MSTRG.7792:MSTRG.6856:MSTRG.10592:MSTRG.9913:MSTRG…	arnt-1:znf596:alx3-2:tlx-1:creb3l-1:dbx:dll-1:ets-3:emx1:ets-5:fli-2:fli-3:ets-1:etv4:fli-1:foxD1:foxD2:foxD3:foxF1 :foxF2:foxL1:foxO:pou-p1:foxP:foxN(P):gcm-2:gli-3:hesl-3:hnf4:Hox4b:nkx3-1:nkx5-2:nkx5-1:Hox3a:nerfin2-1:cbt:klf-1:lhx2-1:lhx2-4:lhx2-3:lhx3:meox:musculin:smad1:smad9:nkx2l-1:a:hr51:pax2/5/8-1:pitx:Pbx-4:Prep:Xfin:zfp-4:zbed-1:zf-5:znf181:zbtb24:ski-1:zfp-7:ctcf:zfp-10:zfp677:smad4-…	71
20	dd_Smes_g4_1	3055361	3055443	83	*	k27ac_pooled_april21_peak_204	5.28219	Distal Intergenic	1	3068657	3071163	2507	1	MSTRG.140	SMEST026622001.1	-13214	2.30174	0.106056	-0.551789	-0.488841	0	0	0	0.691512	0.277051	DYNLL2	dynein light chain LC8-type 2 [Source:HGNC Symbol;Acc:HGNC:24596]	-	-	0	MSTRG.7896:MSTRG.7998:MSTRG.23420:MSTRG.21923:MSTRG.9638:MSTRG.1217:MSTRG.4483:MSTRG.17936:MSTRG.5414:MSTRG.4288:MSTRG.4289:MSTRG.22163:MSTRG.16827:MSTRG.9571:MSTRG.624:MSTRG.11386:MSTRG.22087:MSTRG.10044:MSTRG.5025:MSTRG.2221:MSTRG.14008:MSTRG.2484:MSTRG.1218:MSTRG.9193:MSTRG.5081:MSTRG.2731:MSTRG.22528:MSTRG.19546:MSTRG.7741:MSTRG.3929:MSTRG.6819:MSTRG.11814:MSTRG.10087:MSTRG.20250:MSTRG.13758:…	znf596:Lox5a:Lox5b:barhl2-1:barhl2-2:egr-5:znf362:zf-4:tlx-1:hinfp-1:hinfp-2:rest-1:zfp674:znf-1:znf91:znf333-1:znf652:zscan2-2:zscan2-6:dbx:dll-1:egr*-2:egr4-1:egr4-2:emx1:elf1:foxD1:foxD2:foxD3:foxG:foxL1:foxO:pou-p1:foxP:foxN(P):foxK1:foxK2:foxK3:gata123:gata456-3:gcm-2:gli-1:gli-2:gli-3:gata456-1:gata456-2:gata456-4:fezf2:gfi1:zfp541:zfhx3:prdm14:nkx6-2:hesl-2:Hox1:Hox4a:Hox3a:nerfin2-1:atmin…	90
21	dd_Smes_g4_1	3174683	3174707	25	*	k27ac_pooled_april21_peak_210	2.93288	Promoter	1	3173159	3174395	1237	2	MSTRG.146	SMEST026636001.1	-288	105.111	0.450765	-0.443385	0.0360458	0	0	0	0.0592125	-0.310159	DCDC2C	doublecortin domain containing 2C [Source:HGNC Symbol;Acc:HGNC:32696]	MSTRG.1217:MSTRG.4483:MSTRG.17936:MSTRG.2656:MSTRG.23304:MSTRG.8862:MSTRG.5535:MSTRG.17691:MSTRG.6445:MSTRG.4208:MSTRG.16892:MSTRG.11214:MSTRG.14130:MSTRG.3824:MSTRG.14619:MSTRG.20131:MSTRG.23258:MSTRG.18571:MSTRG.12572:MSTRG.657:MSTRG.8960	egr-5:znf362:zf-4:etv4:fezf2:gfi1:zfp541:zfhx3:musculin:smad1:smad9:myoD:nf-ya1:nf-ya2:zfp-7:tal:ptf-4:ap4-1:ptf-5:twist:rxra	13	MSTRG.7998:MSTRG.23420:MSTRG.21923:MSTRG.9638:SMESG000022963.1:MSTRG.12684:MSTRG.19544:MSTRG.4288:MSTRG.4289:MSTRG.22163:MSTRG.16827:MSTRG.9571:MSTRG.624:MSTRG.11386:MSTRG.22087:MSTRG.10044:MSTRG.5025:MSTRG.20458:MSTRG.2221:MSTRG.19091:MSTRG.2484:MSTRG.1218:MSTRG.9193:MSTRG.10604:MSTRG.11379:MSTRG.22994:MSTRG.4327:MSTRG.19528:MSTRG.2731:MSTRG.23472:MSTRG.22990:MSTRG.12700:MSTRG.8018:MSTRG.11935:M…	Lox5a:Lox5b:barhl2-1:barhl2-2:barhl1:nkx5-3:creb3l-1:hinfp-1:hinfp-2:rest-1:zfp674:znf-1:znf91:znf333-1:znf652:zscan2-2:zscan2-6:rest-2:dbx:coe:egr*-2:egr4-1:egr4-2:ets-3:ets-5:fli-2:fli-3:ets-1:elf1:fli-1:gli-3:gata456-1:gata456-2:gata456-4:nkx6-2:hnf4:Hox4b:nkx3-1:nkx5-2:nkx5-1:Hox3a:klf-1:lhx2-3:lmx1-1:lhx1-3:msx:sall4:fir1:zfp-8:zfp236-1:zfp354:znf101:znf425:znf660:lmpt-3:nkx2l-1:a:nkx3-2:one…	64
22	dd_Smes_g4_1	3454316	3455081	766	*	k27ac_pooled_april21_peak_240	5.11264	Promoter	1	3454463	3481045	26583	1	MSTRG.156	SMEST026665001.1	0	0.15406	0.183114	0.00078461	-0.244398	0	0	0			GHITM	growth hormone inducible transmembrane protein [Source:HGNC Symbol;Acc:HGNC:17281]	MSTRG.11214:MSTRG.22489:MSTRG.17678:MSTRG.17627:MSTRG.23477:MSTRG.18243:MSTRG.10086:MSTRG.4666:MSTRG.7450:MSTRG.5557:MSTRG.572:MSTRG.18286:MSTRG.1402:MSTRG.1743:MSTRG.657:MSTRG.22352:MSTRG.2646	myoD:snail-1:snail-2:Tbx-1/10:Tbx-2/3a:Tbx-2/3c:da:zeb-1:irx-1:irx6-1:irx6-2:irx6-3:six1/2-2:six1/2-3:twist:pou2/3-1:pou2/3-2	10	MSTRG.7896:MSTRG.7998:MSTRG.23420:MSTRG.23513:MSTRG.10410:MSTRG.12684:MSTRG.11379:MSTRG.22994:MSTRG.4327:MSTRG.19528:MSTRG.2656:MSTRG.2731:MSTRG.23472:MSTRG.9479:MSTRG.5625:MSTRG.2171:MSTRG.10087:MSTRG.20250:MSTRG.23304:MSTRG.8862:MSTRG.5535:MSTRG.17691:MSTRG.16138:MSTRG.7287:MSTRG.4403:MSTRG.13843:MSTRG.7792:MSTRG.6856:MSTRG.10592:MSTRG.1469:MSTRG.12466:MSTRG.13692:MSTRG.5965:MSTRG.6954:MSTRG.89…	znf596:Lox5a:Lox5b:e22/23:bsx:nkx5-3:ets-5:fli-2:fli-3:ets-1:etv4:elf1:fli-1:foxA(P):foxC1:foxC2:pou-p1:foxP:fezf2:gfi1:zfp541:zfhx3:prdm14:nkx6-2:hnf4:Hox4b:nkx3-1:nkx5-2:nkx5-1:lhx2-3:lmx1-1:lhx1-1:lhx1-4:msx:sall4:fir1:zfp-8:zfp236-1:zfp354:znf101:znf425:znf660:lmpt-3:smad1:smad9:pdp1:nf-ya1:nf-ya2:nr2f1:nr4a-1:nr4a-2:nr-1:nr2e1:tlx-2:onecut-1:onecut-2:onecut-3:onecut-5:hnf6:cux-2:pax2/5/8-1:p…	50
23	dd_Smes_g4_1	3642415	3642640	226	*	k27ac_pooled_april21_peak_248	2.64856	Intron (MSTRG.170.1/MSTRG.170, intron 13 of 13)	1	3641637	3651194	9558	2	MSTRG.170	MSTRG.170.2	8554	14.2046	0.243609	-0.165935	0.0369901	0	0	0	0.125761	-0.249185	PPP4R1	protein phosphatase 4 regulatory subunit 1 [Source:HGNC Symbol;Acc:HGNC:9320]	MSTRG.10887:MSTRG.2484:MSTRG.1218:MSTRG.9193:MSTRG.3741:MSTRG.13843:MSTRG.19305:MSTRG.12851:MSTRG.17155:SMESG000049967.1:MSTRG.1897:MSTRG.372:MSTRG.6445:MSTRG.2717:MSTRG.11214:MSTRG.3166:MSTRG.7853:MSTRG.4161:MSTRG.1496:MSTRG.16685:MSTRG.1504:MSTRG.5418:MSTRG.15672:MSTRG.6725:MSTRG.7606:MSTRG.15425:MSTRG.19918:MSTRG.10086:MSTRG.18571:MSTRG.22605:MSTRG.12572:MSTRG.9440:MSTRG.3737:MSTRG.17842:MSTRG…	arnt-1:egr*-2:egr4-1:egr4-2:hesl-3:Hox4b:hesl-2:nerfin2-1:atmin:zscan2-4:meis-1:mlx:musculin:mitfl-3:myoD:onecut-1:onecut-2:onecut-3:onecut-5:hnf6:cux-2:rfx3:rfx4:rfx7:sp5:sp6-9:sp8:da:ap4-1:mitfl-2:ptf-5:rreb1:zfp-6:zf-2:zf-8:egr4-3:irx-1:irx6-1:irx6-2:irx6-3:meis-2	26	MSTRG.10887:MSTRG.7896:MSTRG.7998:MSTRG.23420:MSTRG.10410:SMESG000022963.1:MSTRG.1217:MSTRG.4483:MSTRG.17936:MSTRG.19544:MSTRG.4288:MSTRG.4289:MSTRG.22163:MSTRG.16827:MSTRG.9571:MSTRG.624:MSTRG.11386:MSTRG.22087:MSTRG.10044:MSTRG.5025:MSTRG.20458:MSTRG.22126:SMESG000049970.1:SMESG000031904.1:MSTRG.221:MSTRG.10604:MSTRG.19528:MSTRG.11405:MSTRG.20466:MSTRG.17923:MSTRG.22990:MSTRG.23304:MSTRG.8862:M…	arnt-1:znf596:Lox5a:Lox5b:bsx:barhl1:egr-5:znf362:zf-4:creb3l-1:hinfp-1:hinfp-2:rest-1:zfp674:znf-1:znf91:znf333-1:znf652:zscan2-2:zscan2-6:rest-2:zfp560-1:zscan2-5:zscan2-8:zf-6:ets-3:ets-1:gcm-2:gli-1:gli-2:gli-3:fezf2:gfi1:zfp541:zfhx3:nkx6-2:hnf4:isl-1:isl-2:cbt:klf-3:klf-1:lhx2-3:smad1:smad9:nf-ya1:nf-ya2:nkx2l-1:a:nkx3-2:nr4a-1:nr4a-2:hr51:otx-1:otx-2:pax2/5/8-1:pax6-1:pax6-2:Xfin:zfp-4:zbe…	57
24	dd_Smes_g4_1	4012605	4013246	642	*	k27ac_pooled_april21_peak_270	6.33198	Promoter	1	3998031	4012402	14372	2	MSTRG.182	MSTRG.182.3	-203	2.30806	0.164141	-0.0416762	-0.16363	0	0	0	0.247392	0.520471	TMEM196	transmembrane protein 196 [Source:HGNC Symbol;Acc:HGNC:22431]	MSTRG.7896:MSTRG.1217:MSTRG.4483:MSTRG.17936:MSTRG.20458:MSTRG.2221:MSTRG.2731:MSTRG.9479:MSTRG.5625:MSTRG.2171:MSTRG.11405:MSTRG.20466:MSTRG.17923:MSTRG.22990:MSTRG.12851:MSTRG.10215:MSTRG.15979:MSTRG.8925:MSTRG.4330:MSTRG.14931:MSTRG.12358:MSTRG.19417:MSTRG.432:MSTRG.21315:MSTRG.6529:MSTRG.3802:MSTRG.18823:MSTRG.8332:MSTRG.5349:MSTRG.6378:MSTRG.19902:MSTRG.7606:MSTRG.12623:MSTRG.17183:MSTRG.203…	znf596:egr-5:znf362:zf-4:rest-2:dbx:elf1:foxA(P):foxC1:foxC2:gcm-2:gli-1:gli-2:gli-3:nerfin2-1:cbt:klf-1:sall4:fir1:zfp-8:zfp236-1:zfp354:znf101:znf425:znf660:lmpt-3:nr4a-1:nr4a-2:znf181:zbtb24:ski-1:sp5:yy2:zbed8:znf333-2:znf207:zic-1:zic-2:egr-1:ovo-1:prdm13:gl:znf341:prdm15:zfp112:zfp408:znf486:prdm1-1:zfp-3:zfp878:zbed1:zscan2-7:egr4-3:gcm-1:twist	27	MSTRG.7896:MSTRG.10410:SMESG000022963.1:MSTRG.5414:MSTRG.12684:MSTRG.11379:MSTRG.22994:MSTRG.4327:MSTRG.19528:MSTRG.23472:MSTRG.22528:MSTRG.19546:MSTRG.7741:MSTRG.22295:MSTRG.19765:MSTRG.3929:MSTRG.6819:MSTRG.11814:MSTRG.10087:MSTRG.20250:MSTRG.13758:MSTRG.18451:MSTRG.12975:MSTRG.17474:MSTRG.23304:MSTRG.8862:MSTRG.5535:MSTRG.17691:MSTRG.16138:MSTRG.17155:SMESG000049967.1:MSTRG.10177:MSTRG.2271:MS…	znf596:bsx:barhl1:tlx-1:nkx5-3:ets-5:fli-2:fli-3:ets-1:fli-1:foxD1:foxD2:foxD3:foxF1 :foxF2:foxG:foxL1:foxO:pou-p1:foxP:foxN(P):foxK1:foxK2:foxK3:fezf2:gfi1:zfp541:zfhx3:prdm14:atmin:zscan2-4:klf-3:egr-2:lhx1-3:mlx:smad1:smad9:mitfl-3:myoD:nf-ya1:nf-ya2:nr2f1:onecut-1:onecut-2:onecut-3:onecut-5:hnf6:cux-2:otx-1:otx-2:pitx:Pbx-4:Prep:Xfin:zfp-4:zbed-1:zf-5:pou1:zfp-7:ctcf:zfp-10:zfp677:klf-2:sp6-9…	55
25	dd_Smes_g4_1	4385190	4385745	556	*	k27ac_pooled_april21_peak_296	6.44541	Distal Intergenic	1	4381635	4383583	1949	2	MSTRG.200	SMEST026789001.1	-1607	1.27645	0.0498544	-0.67556	-0.491373	1	1	1	0.000877923	-1.00988	CITED2	Cbp/p300 interacting transactivator with Glu/Asp rich carboxy-terminal domain 2 [Source:HGNC Symbol;Acc:HGNC:1987]	-	-	0	MSTRG.7998:MSTRG.23420:MSTRG.1217:MSTRG.4483:MSTRG.17936:MSTRG.12684:MSTRG.4288:MSTRG.4289:MSTRG.22163:MSTRG.16827:MSTRG.9571:MSTRG.624:MSTRG.11386:MSTRG.22087:MSTRG.10044:MSTRG.5025:MSTRG.2221:MSTRG.14008:MSTRG.19091:MSTRG.2484:MSTRG.1218:MSTRG.9193:MSTRG.10604:MSTRG.11379:MSTRG.22994:MSTRG.4327:MSTRG.19528:MSTRG.2656:MSTRG.2731:MSTRG.23472:MSTRG.5625:MSTRG.2171:MSTRG.22990:MSTRG.12700:MSTRG.801…	Lox5a:Lox5b:egr-5:znf362:zf-4:nkx5-3:hinfp-1:hinfp-2:rest-1:zfp674:znf-1:znf91:znf333-1:znf652:zscan2-2:zscan2-6:dbx:dll-1:coe:egr*-2:egr4-1:egr4-2:ets-3:ets-5:fli-2:fli-3:ets-1:etv4:elf1:fli-1:foxC1:foxC2:gli-3:gata456-1:gata456-2:gata456-4:fezf2:gfi1:zfp541:zfhx3:nkx6-2:Hox4b:nkx3-1:nkx5-2:nkx5-1:Hox1:Hox4a:nerfin2-1:cbt:klf-3:klf-1:lmx1-1:lhx1-3:meis-1:musculin:myoD:nf-ya1:nf-ya2:nr4a-1:nr4a-2…	67
26	dd_Smes_g4_1	4450550	4451181	632	*	k27ac_pooled_april21_peak_308	11.8011	Intron (SMEST026797001.1/MSTRG.206, intron 6 of 10)	1	4443397	4461314	17918	1	MSTRG.206	MSTRG.206.3	7153	3.24036	0.236844	-0.24778	-0.658402	0	0	0	0.767237	-0.11439	PPP2R5D	protein phosphatase 2 regulatory subunit B'delta [Source:HGNC Symbol;Acc:HGNC:9312]	MSTRG.23309:MSTRG.9120:MSTRG.10065:MSTRG.8421:MSTRG.23506	gata123:gata456-3:otx-1:otx-2:pitx	3	MSTRG.10887:MSTRG.7896:MSTRG.12684:MSTRG.19544:MSTRG.4288:MSTRG.4289:MSTRG.22163:MSTRG.16827:MSTRG.9571:MSTRG.624:MSTRG.11386:MSTRG.22087:MSTRG.10044:MSTRG.5025:MSTRG.20458:MSTRG.14008:MSTRG.19091:MSTRG.2484:MSTRG.1218:MSTRG.9193:MSTRG.10604:MSTRG.5081:MSTRG.11379:MSTRG.22994:MSTRG.4327:MSTRG.19528:MSTRG.2656:MSTRG.2731:MSTRG.23472:MSTRG.22528:MSTRG.19546:MSTRG.7741:MSTRG.22295:MSTRG.19765:MSTRG.…	arnt-1:znf596:nkx5-3:creb3l-1:hinfp-1:hinfp-2:rest-1:zfp674:znf-1:znf91:znf333-1:znf652:zscan2-2:zscan2-6:rest-2:dll-1:coe:egr*-2:egr4-1:egr4-2:ets-3:emx1:ets-5:fli-2:fli-3:ets-1:etv4:elf1:fli-1:foxD1:foxD2:foxD3:foxF1 :foxF2:foxG:foxL1:foxO:gcm-2:fezf2:gfi1:zfp541:zfhx3:prdm14:hnf4:hesl-2:nkx3-1:nkx5-2:nkx5-1:Hox1:Hox4a:nerfin2-1:isl-1:isl-2:atmin:zscan2-4:klf-3:klf-1:lhx2-1:lhx2-4:lhx1-3:lhx3:M…	87
27	dd_Smes_g4_1	4479332	4479848	517	*	k27ac_pooled_april21_peak_310	6.12262	Intron (MSTRG.207.1/MSTRG.207, intron 3 of 4)	1	4482540	4488547	6008	1	MSTRG.207	MSTRG.207.6	-2692	15.7921	0.224519	-0.310887	-0.193266	1	1	1	0.000422311	-0.73265	TLCD2	TLC domain containing 2 [Source:HGNC Symbol;Acc:HGNC:33522]	MSTRG.22990:MSTRG.4403:MSTRG.10215:MSTRG.18823:MSTRG.8332:MSTRG.4837:MSTRG.9708:MSTRG.7450:MSTRG.5557:MSTRG.572:MSTRG.18286:MSTRG.22352:MSTRG.2646	gli-3:hnf4:cbt:nr4a-1:nr4a-2:pou4-1:pou4-2:irx-1:irx6-1:irx6-2:irx6-3:pou2/3-1:pou2/3-2	7	MSTRG.7998:MSTRG.23420:SMESG000022963.1:MSTRG.1217:MSTRG.4483:MSTRG.17936:MSTRG.4288:MSTRG.4289:MSTRG.22163:MSTRG.16827:MSTRG.9571:MSTRG.624:MSTRG.11386:MSTRG.22087:MSTRG.10044:MSTRG.5025:MSTRG.20458:MSTRG.19091:MSTRG.2484:MSTRG.1218:MSTRG.9193:MSTRG.22528:MSTRG.19546:MSTRG.7741:MSTRG.22295:MSTRG.19765:MSTRG.6819:MSTRG.11814:MSTRG.13758:MSTRG.20466:MSTRG.17923:MSTRG.12700:MSTRG.8018:MSTRG.11935:M…	Lox5a:Lox5b:barhl1:egr-5:znf362:zf-4:hinfp-1:hinfp-2:rest-1:zfp674:znf-1:znf91:znf333-1:znf652:zscan2-2:zscan2-6:rest-2:coe:egr*-2:egr4-1:egr4-2:foxD1:foxD2:foxD3:foxF1 :foxF2:foxL1:foxO:foxN(P):gli-1:gli-2:gata456-1:gata456-2:gata456-4:nkx6-2:Hox4b:hesl-2:nkx3-1:nkx5-2:nkx5-1:nerfin2-1:isl-1:isl-2:lhx1-3:meis-1:musculin:myoD:nf-ya1:nf-ya2:nkx2l-1:nkx3-2:onecut-1:onecut-2:onecut-3:onecut-5:hnf6:c…	69
28	dd_Smes_g4_1	4680382	4680651	270	*	k27ac_pooled_april21_peak_319	5.11264	Promoter	1	4680580	4681450	871	1	MSTRG.216	MSTRG.216.3	0	1.96177	0.00299261	-0.0479793	-0.529835	0	0	0	0.781783	-0.186111	MYL9	myosin light chain 9 [Source:HGNC Symbol;Acc:HGNC:15754]	-	-	0	MSTRG.7896:MSTRG.21923:MSTRG.9638:MSTRG.1217:MSTRG.4483:MSTRG.17936:MSTRG.12684:MSTRG.4288:MSTRG.4289:MSTRG.22163:MSTRG.16827:MSTRG.9571:MSTRG.624:MSTRG.11386:MSTRG.22087:MSTRG.10044:MSTRG.5025:MSTRG.20458:MSTRG.22126:SMESG000049970.1:SMESG000031904.1:MSTRG.221:MSTRG.2221:MSTRG.2484:MSTRG.1218:MSTRG.9193:MSTRG.10604:MSTRG.11379:MSTRG.22994:MSTRG.4327:MSTRG.19528:MSTRG.2656:MSTRG.22528:MSTRG.19546…	znf596:barhl2-1:barhl2-2:egr-5:znf362:zf-4:nkx5-3:hinfp-1:hinfp-2:rest-1:zfp674:znf-1:znf91:znf333-1:znf652:zscan2-2:zscan2-6:rest-2:zfp560-1:zscan2-5:zscan2-8:zf-6:dbx:egr*-2:egr4-1:egr4-2:ets-3:ets-5:fli-2:fli-3:ets-1:etv4:foxD1:foxD2:foxD3:foxL1:foxO:pou-p1:foxP:foxN(P):gata123:gata456-3:gli-1:gli-2:gli-3:gata456-1:gata456-2:gata456-4:hnf4:nkx3-1:nkx5-2:nkx5-1:nerfin2-1:atmin:zscan2-4:cbt:klf-…	70
29	dd_Smes_g4_1	4704182	4704447	266	*	k27ac_pooled_april21_peak_322	7.1886	Promoter	1	4704136	4709025	4890	1	MSTRG.222	MSTRG.222.1	46	0.0840673	0.110577	-0.282535	-0.490241	0	0	0			-	-	MSTRG.10887:MSTRG.10410:MSTRG.4288:MSTRG.4289:MSTRG.22163:MSTRG.16827:MSTRG.9571:MSTRG.624:MSTRG.11386:MSTRG.22087:MSTRG.10044:MSTRG.5025:MSTRG.20458:MSTRG.14008:MSTRG.2484:MSTRG.1218:MSTRG.9193:MSTRG.9479:MSTRG.20466:MSTRG.17923:MSTRG.13843:MSTRG.17155:SMESG000049967.1:MSTRG.10177:MSTRG.15979:MSTRG.6954:MSTRG.23136:MSTRG.10065:MSTRG.8421:MSTRG.2111:MSTRG.12215:MSTRG.21546:MSTRG.23506:MSTRG.4755:…	arnt-1:bsx:hinfp-1:hinfp-2:rest-1:zfp674:znf-1:znf91:znf333-1:znf652:zscan2-2:zscan2-6:rest-2:dll-1:egr*-2:egr4-1:egr4-2:foxA(P):gli-1:gli-2:Hox4b:atmin:zscan2-4:klf-3:klf-1:msx:hr51:otx-1:otx-2:pax2/5/8-1:pax6-1:pax6-2:pitx:Prep:znf181:zbtb24:ski-1:rfx3:rfx7:ctcf:zfp-10:zfp677:scratch-like:shox:sp5:klf-2:sp6-9:sp8:srebp:Tbx-1/10:Tbx-20:Tbx-2/3a:Tbx-2/3c:uncx:znf143:zic-1:zic-2:egr-1:ovo-1:prdm13…	43	MSTRG.10887:MSTRG.7998:MSTRG.23420:MSTRG.12684:MSTRG.10087:MSTRG.20250:MSTRG.11405:MSTRG.16138:MSTRG.3741:MSTRG.7287:MSTRG.4403:MSTRG.19305:MSTRG.23578:MSTRG.20904:MSTRG.9913:MSTRG.12851:MSTRG.17848:MSTRG.9911:MSTRG.10215:MSTRG.4208:MSTRG.16892:MSTRG.19581:MSTRG.18805:MSTRG.6003:a:MSTRG.764:MSTRG.17044:MSTRG.3166:MSTRG.7853:MSTRG.4161:MSTRG.1496:MSTRG.16685:MSTRG.1504:MSTRG.18649:MSTRG.3565:MSTRG…	arnt-1:Lox5a:Lox5b:nkx5-3:pou-p1:foxP:gcm-2:prdm14:hesl-3:nkx6-2:hnf4:hesl-2:Hox1:Hox4a:Hox3a:nerfin2-1:isl-1:isl-2:cbt:smad1:smad9:neuroD-1:fer3l-3:nkx2l-1:a:nkx6-1:nr2f1:onecut-1:onecut-2:onecut-3:onecut-5:hnf6:cux-2:Pbx-4:Xfin:zfp-4:zbed-1:zf-5:pou4-1:pou4-2:zfp-7:kdm5b:smad4-1:six3:six6-2:six6-3:mitfl-2:yy2:zbed8:znf333-2:znf207:prdm15:zfp112:zfp408:znf486:Lox4:egr4-3:foxA1:foxA2:gcm-1:hb-1:h…	44
30	dd_Smes_g4_1	4704774	4704786	13	*	k27ac_pooled_april21_peak_322	7.1886	Promoter	1	4701951	4704647	2697	2	MSTRG.221	MSTRG.221.3	-127	7.08974	0.0400737	-0.282535	-0.490241	1	1	1	0.00660243	-0.7654	IKZF3	IKAROS family zinc finger 3 [Source:HGNC Symbol;Acc:HGNC:13178]	MSTRG.10887:MSTRG.10410:MSTRG.4288:MSTRG.4289:MSTRG.22163:MSTRG.16827:MSTRG.9571:MSTRG.624:MSTRG.11386:MSTRG.22087:MSTRG.10044:MSTRG.5025:MSTRG.20458:MSTRG.14008:MSTRG.2484:MSTRG.1218:MSTRG.9193:MSTRG.9479:MSTRG.20466:MSTRG.17923:MSTRG.4403:MSTRG.13843:MSTRG.17155:SMESG000049967.1:MSTRG.10177:MSTRG.15979:MSTRG.2271:MSTRG.6954:MSTRG.23136:MSTRG.3166:MSTRG.7853:MSTRG.4161:MSTRG.1496:MSTRG.16685:MST…	arnt-1:bsx:hinfp-1:hinfp-2:rest-1:zfp674:znf-1:znf91:znf333-1:znf652:zscan2-2:zscan2-6:rest-2:dll-1:egr*-2:egr4-1:egr4-2:foxA(P):gli-1:gli-2:hnf4:Hox4b:atmin:zscan2-4:klf-3:klf-1:egr-2:msx:hr51:onecut-1:onecut-2:onecut-3:onecut-5:hnf6:cux-2:otx-1:otx-2:pax2/5/8-1:pax6-1:pax6-2:pitx:Prep:znf181:zbtb24:ski-1:zfp-7:rfx3:rfx4:rfx7:ctcf:zfp-10:zfp677:scratch-like:shox:sp5:klf-2:sp6-9:sp8:srebp:Tbx-1/1…	48	MSTRG.10887:MSTRG.7998:MSTRG.23420:MSTRG.23513:MSTRG.12684:MSTRG.19544:MSTRG.10087:MSTRG.20250:MSTRG.11405:MSTRG.16138:MSTRG.3741:MSTRG.7287:MSTRG.19305:MSTRG.23578:MSTRG.20904:MSTRG.12851:MSTRG.17848:MSTRG.9911:MSTRG.10215:MSTRG.7427:MSTRG.4208:MSTRG.16892:MSTRG.19581:MSTRG.18805:MSTRG.14130:MSTRG.3824:MSTRG.764:MSTRG.17044:MSTRG.18823:MSTRG.8332:MSTRG.22726:MSTRG.17998:MSTRG.18649:MSTRG.3565:MS…	arnt-1:Lox5a:Lox5b:e22/23:nkx5-3:creb3l-1:pou-p1:foxP:gcm-2:prdm14:hesl-3:nkx6-2:hesl-2:Hox1:Hox4a:nerfin2-1:isl-1:isl-2:cbt:lhx1-3:smad1:smad9:neuroD-1:fer3l-3:nf-ya1:nf-ya2:nkx6-1:nr2f1:nr4a-1:nr4a-2:neuroD-2:olig:Pbx-4:Xfin:zfp-4:zbed-1:zf-5:gtf2b-4:kdm5b:smad4-1:six3:six6-2:six6-3:six4:mitfl-2:yy2:zbed8:znf333-2:znf207:prdm15:zfp112:zfp408:znf486:Lox4:alx4:egr4-3:gcm-1:hb-1:hb-2:arx:onecut-4:…	46
31	dd_Smes_g4_1	4705654	4705908	255	*	k27ac_pooled_april21_peak_323	5.50092	Promoter	1	4701917	4706099	4183	2	MSTRG.221	MSTRG.221.1	191	7.08974	0.0400737	-0.159649	-0.3982	1	1	1	0.00660243	-0.7654	IKZF3	IKAROS family zinc finger 3 [Source:HGNC Symbol;Acc:HGNC:13178]	MSTRG.10887:MSTRG.10410:MSTRG.14008:MSTRG.2484:MSTRG.1218:MSTRG.9193:MSTRG.9479:MSTRG.20466:MSTRG.17923:MSTRG.4403:MSTRG.13843:MSTRG.17155:SMESG000049967.1:MSTRG.10177:MSTRG.15979:MSTRG.2271:MSTRG.6954:MSTRG.11214:MSTRG.3166:MSTRG.7853:MSTRG.4161:MSTRG.1496:MSTRG.16685:MSTRG.1504:MSTRG.10065:MSTRG.8421:MSTRG.2111:MSTRG.12215:MSTRG.21546:MSTRG.23506:MSTRG.4755:MSTRG.14619:MSTRG.5418:MSTRG.15672:MS…	arnt-1:bsx:dll-1:egr*-2:egr4-1:egr4-2:foxA(P):gli-1:gli-2:hnf4:Hox4b:atmin:zscan2-4:klf-3:klf-1:egr-2:msx:myoD:onecut-1:onecut-2:onecut-3:onecut-5:hnf6:cux-2:otx-1:otx-2:pax2/5/8-1:pax6-1:pax6-2:pitx:Prep:zfp-7:rfx3:rfx4:rfx7:ctcf:zfp-10:zfp677:scratch-like:shox:snail-1:snail-2:sp5:klf-2:sp6-9:sp8:srebp:Tbx-1/10:Tbx-20:Tbx-2/3a:Tbx-2/3c:da:uncx:zeb-1:znf143:irx-1:irx6-1:irx6-2:irx6-3:ovo-2:ovo-3:…	44	MSTRG.10887:MSTRG.23513:MSTRG.12684:MSTRG.19544:MSTRG.20458:MSTRG.2221:MSTRG.11405:MSTRG.16138:MSTRG.19305:MSTRG.23578:MSTRG.20904:MSTRG.10215:MSTRG.7427:MSTRG.12930:MSTRG.12309:MSTRG.2947:MSTRG.19581:MSTRG.18805:MSTRG.14130:MSTRG.3824:MSTRG.18823:MSTRG.8332:MSTRG.22726:MSTRG.17998:MSTRG.3565:MSTRG.7049:MSTRG.19418:MSTRG.20936:MSTRG.11128:MSTRG.4536:MSTRG.9898:MSTRG.3785:MSTRG.6271:MSTRG.7110:MST…	arnt-1:e22/23:nkx5-3:creb3l-1:rest-2:dbx:gcm-2:prdm14:hesl-2:Hox1:Hox4a:cbt:lhx1-3:Mef2-1:gtf2a1:Mef2-2:neuroD-1:fer3l-3:nf-ya1:nf-ya2:nr4a-1:nr4a-2:neuroD-2:olig:Xfin:zfp-4:zbed-1:zf-5:gtf2b-4:kdm5b:smad4-1:six3:six6-2:six6-3:six4:prdm15:zfp112:zfp408:znf486:alx4:prdm1-1:zfp-3:zfp878:zbed1:zscan2-7:egr4-3:arx:onecut-4:tead1:nkx1:nkx1-1:nkx1-2:six1/2-2:six1/2-3:rxra	34
32	dd_Smes_g4_1	4707189	4707416	228	*	k27ac_pooled_april21_peak_324	7.26278	Promoter	1	4707047	4707696	650	1	MSTRG.223	SMEST026830001.1	142	0	0	-0.27906	-0.227523	0	0	0			-	-	-	-	0	MSTRG.7896:MSTRG.5414:MSTRG.4288:MSTRG.4289:MSTRG.22163:MSTRG.16827:MSTRG.9571:MSTRG.624:MSTRG.11386:MSTRG.22087:MSTRG.10044:MSTRG.5025:MSTRG.2221:MSTRG.14008:MSTRG.2484:MSTRG.1218:MSTRG.9193:MSTRG.10604:MSTRG.11379:MSTRG.22994:MSTRG.4327:MSTRG.19528:MSTRG.23472:MSTRG.5625:MSTRG.2171:MSTRG.22528:MSTRG.19546:MSTRG.7741:MSTRG.22295:MSTRG.19765:MSTRG.3929:MSTRG.6819:MSTRG.11814:MSTRG.23309:MSTRG.912…	znf596:tlx-1:hinfp-1:hinfp-2:rest-1:zfp674:znf-1:znf91:znf333-1:znf652:zscan2-2:zscan2-6:dbx:dll-1:egr*-2:egr4-1:egr4-2:ets-3:ets-5:fli-2:fli-3:ets-1:fli-1:foxC1:foxC2:foxD1:foxD2:foxD3:foxF1 :foxF2:foxG:foxL1:foxO:gata123:gata456-3:gcm-2:gli-3:gata456-1:gata456-2:gata456-4:fezf2:gfi1:zfp541:zfhx3:hnf4:cbt:musculin:sall4:fir1:zfp-8:zfp236-1:zfp354:znf101:znf425:znf660:lmpt-3:myoD:nr-1:nr2e1:tlx-2…	52
33	dd_Smes_g4_1	4808116	4808354	239	*	k27ac_pooled_april21_peak_336	2.68947	Intron (MSTRG.235.1/MSTRG.235, intron 17 of 23)	1	4785192	4809971	24780	1	MSTRG.235	MSTRG.235.20	22924	6.00542	0.196874	-0.41714	-0.972825	0	0	0	0.371521	-0.178992	MADD	MAP kinase activating death domain [Source:HGNC Symbol;Acc:HGNC:6766]	-	-	0	MSTRG.7896:MSTRG.9597:MSTRG.6974:MSTRG.7998:MSTRG.23420:SMESG000022963.1:MSTRG.1217:MSTRG.4483:MSTRG.17936:MSTRG.20458:MSTRG.2484:MSTRG.1218:MSTRG.9193:MSTRG.10087:MSTRG.20250:MSTRG.11405:MSTRG.22990:MSTRG.23304:MSTRG.8862:MSTRG.5535:MSTRG.17691:MSTRG.7287:MSTRG.4403:MSTRG.9913:MSTRG.17848:MSTRG.9911:MSTRG.17155:SMESG000049967.1:MSTRG.10215:MSTRG.15979:MSTRG.2271:MSTRG.1469:MSTRG.7427:MSTRG.1897:…	znf596:pax3/7-1:alx3-2:Lox5a:Lox5b:barhl1:egr-5:znf362:zf-4:rest-2:egr*-2:egr4-1:egr4-2:pou-p1:foxP:gcm-2:gli-3:fezf2:gfi1:zfp541:zfhx3:nkx6-2:hnf4:Hox3a:isl-1:isl-2:atmin:zscan2-4:cbt:klf-1:egr-2:lhx2-3:lhx1-3:meis-1:msx:sall4:fir1:zfp-8:zfp236-1:zfp354:znf101:znf425:znf660:lmpt-3:smad1:smad9:mitfl-3:nf-ya1:nf-ya2:nkx2l-1:a:nkx3-2:nr2f1:nr4a-1:nr4a-2:nr-1:nr2e1:tlx-2:Xfin:zfp-4:zbed-1:zf-5:zfp-7…	64
34	dd_Smes_g4_1	4808595	4808992	398	*	k27ac_pooled_april21_peak_336	2.68947	Intron (MSTRG.235.1/MSTRG.235, intron 17 of 23)	1	4785192	4809971	24780	1	MSTRG.235	MSTRG.235.20	23403	6.00542	0.196874	-0.41714	-0.972825	0	0	0	0.371521	-0.178992	MADD	MAP kinase activating death domain [Source:HGNC Symbol;Acc:HGNC:6766]	-	-	0	MSTRG.7896:MSTRG.9597:MSTRG.6974:MSTRG.7998:MSTRG.23420:MSTRG.1217:MSTRG.4483:MSTRG.17936:MSTRG.20458:MSTRG.2484:MSTRG.1218:MSTRG.9193:MSTRG.10604:MSTRG.11379:MSTRG.22994:MSTRG.4327:MSTRG.19528:MSTRG.2656:MSTRG.2731:MSTRG.23472:MSTRG.10087:MSTRG.20250:MSTRG.11405:MSTRG.22990:MSTRG.12700:MSTRG.8018:MSTRG.11935:MSTRG.23304:MSTRG.8862:MSTRG.5535:MSTRG.17691:MSTRG.7287:MSTRG.4403:MSTRG.9913:MSTRG.171…	znf596:pax3/7-1:alx3-2:Lox5a:Lox5b:egr-5:znf362:zf-4:rest-2:egr*-2:egr4-1:egr4-2:ets-3:ets-5:fli-2:fli-3:ets-1:etv4:elf1:fli-1:pou-p1:foxP:gcm-2:gli-3:gata456-1:gata456-2:gata456-4:fezf2:gfi1:zfp541:zfhx3:nkx6-2:hnf4:Hox3a:atmin:zscan2-4:cbt:klf-1:egr-2:lhx1-3:meis-1:sall4:fir1:zfp-8:zfp236-1:zfp354:znf101:znf425:znf660:lmpt-3:smad1:smad9:mitfl-3:myoD:nf-ya1:nf-ya2:nkx2l-1:a:nkx3-2:nr2f1:nr4a-1:n…	71
35	dd_Smes_g4_1	5036832	5037074	243	*	k27ac_pooled_april21_peak_356	2.20259	Intron (SMEST026871001.1/MSTRG.237, intron 1 of 15)	1	5015822	5035775	19954	2	MSTRG.237	MSTRG.237.4	-1057	0.432176	0.122952	-0.289865	-0.369925	0	0	0	0.866628	-0.0931732	TTC3	tetratricopeptide repeat domain 3 [Source:HGNC Symbol;Acc:HGNC:12393]	-	-	0	MSTRG.7896:MSTRG.9597:MSTRG.1217:MSTRG.4483:MSTRG.17936:MSTRG.12684:MSTRG.4288:MSTRG.4289:MSTRG.22163:MSTRG.16827:MSTRG.9571:MSTRG.624:MSTRG.11386:MSTRG.22087:MSTRG.10044:MSTRG.5025:MSTRG.20458:MSTRG.2484:MSTRG.1218:MSTRG.9193:MSTRG.5081:MSTRG.5625:MSTRG.2171:MSTRG.22295:MSTRG.19765:MSTRG.10087:MSTRG.20250:MSTRG.18815:MSTRG.21195:SMESG000072873.1:MSTRG.19883:MSTRG.3843:MSTRG.5337:MSTRG.14880:MSTR…	znf596:pax3/7-1:egr-5:znf362:zf-4:nkx5-3:hinfp-1:hinfp-2:rest-1:zfp674:znf-1:znf91:znf333-1:znf652:zscan2-2:zscan2-6:rest-2:egr*-2:egr4-1:egr4-2:emx1:foxC1:foxC2:foxF1 :foxF2:pou-p1:foxP:foxQ/D:foxJ1-1:foxJ1-2:foxJ1-3:foxJ1-4:foxJ1-5:foxN2/3-1:foxN2/3-2:foxN2/3-3:foxK1:foxK2:foxK3:gli-1:gli-2:gli-3:Hox4b:Hox1:Hox4a:Hox3a:nerfin2-1:isl-1:isl-2:atmin:zscan2-4:klf-3:egr-2:lbx:lhx2-1:lhx2-4:lhx1-3:lh…	72
36	dd_Smes_g4_1	5037312	5037477	166	*	k27ac_pooled_april21_peak_356	2.20259	Intron (SMEST026871001.1/MSTRG.237, intron 1 of 15)	1	5015822	5035775	19954	2	MSTRG.237	MSTRG.237.4	-1537	0.432176	0.122952	-0.289865	-0.369925	0	0	0	0.866628	-0.0931732	TTC3	tetratricopeptide repeat domain 3 [Source:HGNC Symbol;Acc:HGNC:12393]	-	-	0	MSTRG.9597:MSTRG.1217:MSTRG.4483:MSTRG.17936:MSTRG.12684:MSTRG.4288:MSTRG.4289:MSTRG.22163:MSTRG.16827:MSTRG.9571:MSTRG.624:MSTRG.11386:MSTRG.22087:MSTRG.10044:MSTRG.5025:MSTRG.20458:MSTRG.2484:MSTRG.1218:MSTRG.9193:MSTRG.5081:MSTRG.5625:MSTRG.2171:MSTRG.22295:MSTRG.19765:MSTRG.10087:MSTRG.20250:MSTRG.18815:MSTRG.21195:SMESG000072873.1:MSTRG.19883:MSTRG.3843:MSTRG.5337:MSTRG.14880:MSTRG.5693:MSTR…	pax3/7-1:egr-5:znf362:zf-4:nkx5-3:hinfp-1:hinfp-2:rest-1:zfp674:znf-1:znf91:znf333-1:znf652:zscan2-2:zscan2-6:rest-2:egr*-2:egr4-1:egr4-2:emx1:foxC1:foxC2:foxF1 :foxF2:pou-p1:foxP:foxQ/D:foxJ1-1:foxJ1-2:foxJ1-3:foxJ1-4:foxJ1-5:foxN2/3-1:foxN2/3-2:foxN2/3-3:foxK1:foxK2:foxK3:gli-1:gli-2:gli-3:Hox4b:Hox1:Hox4a:Hox3a:nerfin2-1:isl-1:isl-2:atmin:zscan2-4:klf-3:egr-2:lbx:lhx2-1:lhx2-4:lhx1-3:lhx3:meis…	77
37	dd_Smes_g4_1	5036939	5037074	136	*	k27ac_pooled_april21_peak_357	1.71321	Intron (SMEST026871001.1/MSTRG.237, intron 1 of 15)	1	5015822	5035775	19954	2	MSTRG.237	MSTRG.237.4	-1164	0.432176	0.122952	-0.28827	-0.379012	0	0	0	0.866628	-0.0931732	TTC3	tetratricopeptide repeat domain 3 [Source:HGNC Symbol;Acc:HGNC:12393]	-	-	0	MSTRG.7896:MSTRG.9597:MSTRG.1217:MSTRG.4483:MSTRG.17936:MSTRG.12684:MSTRG.4288:MSTRG.4289:MSTRG.22163:MSTRG.16827:MSTRG.9571:MSTRG.624:MSTRG.11386:MSTRG.22087:MSTRG.10044:MSTRG.5025:MSTRG.20458:MSTRG.2484:MSTRG.1218:MSTRG.9193:MSTRG.5081:MSTRG.5625:MSTRG.2171:MSTRG.22295:MSTRG.19765:MSTRG.10087:MSTRG.20250:MSTRG.18815:MSTRG.21195:SMESG000072873.1:MSTRG.19883:MSTRG.3843:MSTRG.5337:MSTRG.14880:MSTR…	znf596:pax3/7-1:egr-5:znf362:zf-4:nkx5-3:hinfp-1:hinfp-2:rest-1:zfp674:znf-1:znf91:znf333-1:znf652:zscan2-2:zscan2-6:rest-2:egr*-2:egr4-1:egr4-2:emx1:foxC1:foxC2:foxF1 :foxF2:pou-p1:foxP:foxQ/D:foxJ1-1:foxJ1-2:foxJ1-3:foxJ1-4:foxJ1-5:foxN2/3-1:foxN2/3-2:foxN2/3-3:foxK1:foxK2:foxK3:gli-1:gli-2:gli-3:Hox4b:Hox1:Hox4a:Hox3a:nerfin2-1:isl-1:isl-2:atmin:zscan2-4:klf-3:egr-2:lbx:lhx2-1:lhx2-4:lhx1-3:lh…	76
38	dd_Smes_g4_1	5037312	5037568	257	*	k27ac_pooled_april21_peak_357	1.71321	Intron (SMEST026871001.1/MSTRG.237, intron 1 of 15)	1	5015822	5035775	19954	2	MSTRG.237	MSTRG.237.4	-1537	0.432176	0.122952	-0.28827	-0.379012	0	0	0	0.866628	-0.0931732	TTC3	tetratricopeptide repeat domain 3 [Source:HGNC Symbol;Acc:HGNC:12393]	-	-	0	MSTRG.9597:MSTRG.1217:MSTRG.4483:MSTRG.17936:MSTRG.12684:MSTRG.4288:MSTRG.4289:MSTRG.22163:MSTRG.16827:MSTRG.9571:MSTRG.624:MSTRG.11386:MSTRG.22087:MSTRG.10044:MSTRG.5025:MSTRG.20458:MSTRG.2484:MSTRG.1218:MSTRG.9193:MSTRG.5081:MSTRG.5625:MSTRG.2171:MSTRG.22295:MSTRG.19765:MSTRG.10087:MSTRG.20250:MSTRG.18815:MSTRG.21195:SMESG000072873.1:MSTRG.19883:MSTRG.3843:MSTRG.5337:MSTRG.14880:MSTRG.5693:MSTR…	pax3/7-1:egr-5:znf362:zf-4:nkx5-3:hinfp-1:hinfp-2:rest-1:zfp674:znf-1:znf91:znf333-1:znf652:zscan2-2:zscan2-6:rest-2:egr*-2:egr4-1:egr4-2:emx1:foxC1:foxC2:foxF1 :foxF2:pou-p1:foxP:foxQ/D:foxJ1-1:foxJ1-2:foxJ1-3:foxJ1-4:foxJ1-5:foxN2/3-1:foxN2/3-2:foxN2/3-3:foxK1:foxK2:foxK3:gli-1:gli-2:gli-3:Hox4b:Hox1:Hox4a:Hox3a:nerfin2-1:isl-1:isl-2:atmin:zscan2-4:klf-3:egr-2:lbx:lhx2-1:lhx2-4:lhx1-3:lhx3:meis…	77
39	dd_Smes_g4_1	5292869	5293136	268	*	k27ac_pooled_april21_peak_371	6.65167	Intron (SMEST026902001.1/MSTRG.241, intron 1 of 1)	1	5295172	5295815	644	1	MSTRG.241	MSTRG.241.3	-2036	0.406712	0.0671563	-0.29178	-0.26698	0	0	0			TTC23L	tetratricopeptide repeat domain 23 like [Source:HGNC Symbol;Acc:HGNC:26355]	MSTRG.17627:MSTRG.7450:MSTRG.5557:MSTRG.572:MSTRG.18286	Tbx-1/10:irx-1:irx6-1:irx6-2:irx6-3	2	MSTRG.10887:MSTRG.1217:MSTRG.4483:MSTRG.17936:MSTRG.12684:MSTRG.19544:MSTRG.4288:MSTRG.4289:MSTRG.22163:MSTRG.16827:MSTRG.9571:MSTRG.624:MSTRG.11386:MSTRG.22087:MSTRG.10044:MSTRG.5025:MSTRG.22126:SMESG000049970.1:SMESG000031904.1:MSTRG.221:MSTRG.2484:MSTRG.1218:MSTRG.9193:MSTRG.10604:MSTRG.2731:MSTRG.23309:MSTRG.9120:MSTRG.20466:MSTRG.17923:MSTRG.22990:MSTRG.3741:MSTRG.19305:MSTRG.12851:MSTRG.102…	arnt-1:egr-5:znf362:zf-4:nkx5-3:creb3l-1:hinfp-1:hinfp-2:rest-1:zfp674:znf-1:znf91:znf333-1:znf652:zscan2-2:zscan2-6:zfp560-1:zscan2-5:zscan2-8:zf-6:egr*-2:egr4-1:egr4-2:ets-3:elf1:gata123:gata456-3:gli-1:gli-2:gli-3:hesl-3:hesl-2:nerfin2-1:cbt:klf-3:klf-1:lbx:lhx1-3:lhx3:meis-1:mlx:smad1:smad9:mitfl-3:myoD:pdp1:nkx2l-1:nkx3-2:nr4a-1:nr4a-2:hr51:pax2/5/8-1:pax6-1:pax6-2:Prep:a:rfx3:rfx4:rfx7:gtf2…	59
40	dd_Smes_g4_1	5618523	5618902	380	*	k27ac_pooled_april21_peak_390	9.5783	Promoter	1	5619027	5621865	2839	1	MSTRG.251	MSTRG.251.1	-125	0.0463732	0.0208378	-0.338871	-0.577358	0	0	0					-	-	0	MSTRG.21923:MSTRG.9638:MSTRG.1217:MSTRG.4483:MSTRG.17936:MSTRG.12684:MSTRG.20458:MSTRG.22126:SMESG000049970.1:SMESG000031904.1:MSTRG.221:MSTRG.14008:MSTRG.2484:MSTRG.1218:MSTRG.9193:MSTRG.10604:MSTRG.22528:MSTRG.19546:MSTRG.7741:MSTRG.22295:MSTRG.19765:MSTRG.3929:MSTRG.6819:MSTRG.11814:MSTRG.10087:MSTRG.20250:MSTRG.13758:MSTRG.18815:MSTRG.21195:SMESG000072873.1:MSTRG.19883:MSTRG.3843:MSTRG.5337:M…	barhl2-1:barhl2-2:egr-5:znf362:zf-4:nkx5-3:rest-2:zfp560-1:zscan2-5:zscan2-8:zf-6:dll-1:egr*-2:egr4-1:egr4-2:ets-3:foxD1:foxD2:foxD3:foxF1 :foxF2:foxG:foxL1:foxO:pou-p1:foxP:foxN(P):foxQ/D:foxJ1-1:foxJ1-2:foxJ1-3:foxJ1-4:foxJ1-5:foxN2/3-1:foxN2/3-2:foxN2/3-3:foxK1:foxK2:foxK3:gcm-2:gli-3:fezf2:gfi1:zfp541:zfhx3:prdm14:hesl-3:nerfin2-1:atmin:zscan2-4:cbt:klf-3:egr-2:lhx1-3:meis-1:musculin:sall4:fi…	82
41	dd_Smes_g4_1	6976518	6977274	757	*	k27ac_pooled_april21_peak_435	6.05366	Distal Intergenic	1	6971943	6973140	1198	1	MSTRG.288	SMEST027151001.1	4575	52.9782	0.437696	-0.434909	-0.214917	1	1	1	0.0359543	0.309469	TRAF5	TNF receptor associated factor 5 [Source:HGNC Symbol;Acc:HGNC:12035]	-	-	0	MSTRG.7896:MSTRG.7998:MSTRG.23420:MSTRG.12684:MSTRG.4288:MSTRG.4289:MSTRG.22163:MSTRG.16827:MSTRG.9571:MSTRG.624:MSTRG.11386:MSTRG.22087:MSTRG.10044:MSTRG.5025:MSTRG.2221:MSTRG.2484:MSTRG.1218:MSTRG.9193:MSTRG.10604:MSTRG.5081:MSTRG.11379:MSTRG.22994:MSTRG.4327:MSTRG.2656:MSTRG.23472:MSTRG.11405:MSTRG.20466:MSTRG.17923:MSTRG.22990:MSTRG.23304:MSTRG.8862:MSTRG.5535:MSTRG.17691:MSTRG.7287:MSTRG.440…	znf596:Lox5a:Lox5b:nkx5-3:hinfp-1:hinfp-2:rest-1:zfp674:znf-1:znf91:znf333-1:znf652:zscan2-2:zscan2-6:dbx:egr*-2:egr4-1:egr4-2:ets-3:emx1:ets-5:fli-2:fli-3:etv4:fli-1:gcm-2:gli-1:gli-2:gli-3:fezf2:gfi1:zfp541:zfhx3:nkx6-2:hnf4:Hox4b:hesl-2:atmin:zscan2-4:cbt:klf-3:klf-1:lhx1-3:lhx3:meox:musculin:sall4:fir1:zfp-8:zfp236-1:zfp354:znf101:znf425:znf660:lmpt-3:smad1:smad9:mitfl-3:myoD:nf-ya1:nf-ya2:nr…	79
42	dd_Smes_g4_1	6977723	6978723	1001	*	k27ac_pooled_april21_peak_436	4.57921	Distal Intergenic	1	6971943	6973140	1198	1	MSTRG.288	SMEST027151001.1	5780	52.9782	0.437696	-0.48914	-0.325667	1	1	1	0.0359543	0.309469	TRAF5	TNF receptor associated factor 5 [Source:HGNC Symbol;Acc:HGNC:12035]	-	-	0	SMESG000022963.1:MSTRG.12684:MSTRG.4288:MSTRG.4289:MSTRG.22163:MSTRG.16827:MSTRG.9571:MSTRG.624:MSTRG.11386:MSTRG.22087:MSTRG.10044:MSTRG.5025:MSTRG.20458:MSTRG.14008:MSTRG.2484:MSTRG.1218:MSTRG.9193:MSTRG.10604:MSTRG.11379:MSTRG.22994:MSTRG.4327:MSTRG.2656:MSTRG.23472:MSTRG.9479:MSTRG.18451:MSTRG.12975:MSTRG.17474:MSTRG.20466:MSTRG.17923:MSTRG.23304:MSTRG.8862:MSTRG.5535:MSTRG.17691:MSTRG.4403:M…	barhl1:nkx5-3:hinfp-1:hinfp-2:rest-1:zfp674:znf-1:znf91:znf333-1:znf652:zscan2-2:zscan2-6:rest-2:dll-1:egr*-2:egr4-1:egr4-2:ets-3:ets-5:fli-2:fli-3:etv4:fli-1:foxA(P):foxK1:foxK2:foxK3:gli-1:gli-2:fezf2:gfi1:zfp541:zfhx3:hnf4:Hox4b:lmx1-1:lhx1-3:Mef2-1:gtf2a1:Mef2-2:sall4:fir1:zfp-8:zfp236-1:zfp354:znf101:znf425:znf660:lmpt-3:mitfl-3:myoD:nf-ya1:nf-ya2:nr2f1:nr4a-1:nr4a-2:phox:pitx:Pbx-4:Prep:Xfi…	50
43	dd_Smes_g4_1	7395424	7395651	228	*	k27ac_pooled_april21_peak_442	4.92597	Promoter	1	7395405	7405881	10477	1	MSTRG.303	SMEST027204003.1	19	39.0451	0.15934	-0.675327	-0.0723477	0	0	0	0.406341	-0.165665	ACSBG2	acyl-CoA synthetase bubblegum family member 2 [Source:HGNC Symbol;Acc:HGNC:24174]	MSTRG.18823:MSTRG.8332:MSTRG.1402:MSTRG.1743	nr4a-1:nr4a-2:six1/2-2:six1/2-3	2	MSTRG.10887:MSTRG.7896:MSTRG.7998:MSTRG.23420:SMESG000022963.1:MSTRG.5414:MSTRG.12684:MSTRG.19544:MSTRG.4288:MSTRG.4289:MSTRG.22163:MSTRG.16827:MSTRG.9571:MSTRG.624:MSTRG.11386:MSTRG.22087:MSTRG.10044:MSTRG.5025:MSTRG.20458:MSTRG.22126:SMESG000049970.1:SMESG000031904.1:MSTRG.221:MSTRG.14008:MSTRG.19091:MSTRG.2484:MSTRG.1218:MSTRG.9193:MSTRG.5081:MSTRG.9479:MSTRG.5625:MSTRG.2171:MSTRG.22528:MSTRG.…	arnt-1:znf596:Lox5a:Lox5b:barhl1:tlx-1:nkx5-3:creb3l-1:hinfp-1:hinfp-2:rest-1:zfp674:znf-1:znf91:znf333-1:znf652:zscan2-2:zscan2-6:rest-2:zfp560-1:zscan2-5:zscan2-8:zf-6:dll-1:coe:egr*-2:egr4-1:egr4-2:emx1:foxA(P):foxC1:foxC2:foxD1:foxD2:foxD3:foxG:foxL1:foxO:foxN(P):foxK1:foxK2:foxK3:gcm-2:gli-1:gli-2:gli-3:hesl-3:nkx6-2:Hox4b:hesl-2:nkx3-1:nkx5-2:nkx5-1:Hox1:Hox4a:Hox3a:nerfin2-1:isl-1:isl-2:at…	99
44	dd_Smes_g4_1	7402793	7403089	297	*	k27ac_pooled_april21_peak_443	3.50455	Promoter	1	7402380	7404401	2022	1	MSTRG.303	MSTRG.303.6	413	39.0451	0.15934	-0.437874	0.0247117	0	0	0	0.406341	-0.165665	ACSBG2	acyl-CoA synthetase bubblegum family member 2 [Source:HGNC Symbol;Acc:HGNC:24174]	MSTRG.23513:MSTRG.11214:MSTRG.15832	e22/23:myoD:pou1	3	MSTRG.7998:MSTRG.23420:MSTRG.5414:MSTRG.19544:MSTRG.4288:MSTRG.4289:MSTRG.22163:MSTRG.16827:MSTRG.9571:MSTRG.624:MSTRG.11386:MSTRG.22087:MSTRG.10044:MSTRG.5025:MSTRG.2484:MSTRG.1218:MSTRG.9193:MSTRG.5625:MSTRG.2171:MSTRG.22528:MSTRG.19546:MSTRG.7741:MSTRG.22295:MSTRG.19765:MSTRG.3929:MSTRG.6819:MSTRG.11814:MSTRG.13758:MSTRG.18815:MSTRG.21195:SMESG000072873.1:MSTRG.19883:MSTRG.3843:MSTRG.5337:MSTR…	Lox5a:Lox5b:tlx-1:creb3l-1:hinfp-1:hinfp-2:rest-1:zfp674:znf-1:znf91:znf333-1:znf652:zscan2-2:zscan2-6:egr*-2:egr4-1:egr4-2:foxC1:foxC2:foxD1:foxD2:foxD3:foxF1 :foxF2:foxG:foxL1:foxO:foxN(P):foxQ/D:foxJ1-1:foxJ1-2:foxJ1-3:foxJ1-4:foxJ1-5:foxN2/3-1:foxN2/3-2:foxN2/3-3:foxK1:foxK2:foxK3:gata123:gata456-3:gcm-2:gli-3:nkx6-2:hnf4:Hox4b:nerfin2-1:atmin:zscan2-4:Mef2-1:gtf2a1:Mef2-2:meis-1:smad1:smad9:…	64
45	dd_Smes_g4_1	7402793	7403192	400	*	k27ac_pooled_april21_peak_444	1.42765	Promoter	1	7402380	7404401	2022	1	MSTRG.303	MSTRG.303.6	413	39.0451	0.15934	-0.437874	0.0247117	0	0	0	0.406341	-0.165665	ACSBG2	acyl-CoA synthetase bubblegum family member 2 [Source:HGNC Symbol;Acc:HGNC:24174]	MSTRG.23513:MSTRG.11214:MSTRG.15832	e22/23:myoD:pou1	3	MSTRG.7998:MSTRG.23420:MSTRG.5414:MSTRG.19544:MSTRG.4288:MSTRG.4289:MSTRG.22163:MSTRG.16827:MSTRG.9571:MSTRG.624:MSTRG.11386:MSTRG.22087:MSTRG.10044:MSTRG.5025:MSTRG.2484:MSTRG.1218:MSTRG.9193:MSTRG.5625:MSTRG.2171:MSTRG.22528:MSTRG.19546:MSTRG.7741:MSTRG.22295:MSTRG.19765:MSTRG.3929:MSTRG.6819:MSTRG.11814:MSTRG.13758:MSTRG.18815:MSTRG.21195:SMESG000072873.1:MSTRG.19883:MSTRG.3843:MSTRG.5337:MSTR…	Lox5a:Lox5b:tlx-1:creb3l-1:hinfp-1:hinfp-2:rest-1:zfp674:znf-1:znf91:znf333-1:znf652:zscan2-2:zscan2-6:egr*-2:egr4-1:egr4-2:foxC1:foxC2:foxD1:foxD2:foxD3:foxF1 :foxF2:foxG:foxL1:foxO:foxN(P):foxQ/D:foxJ1-1:foxJ1-2:foxJ1-3:foxJ1-4:foxJ1-5:foxN2/3-1:foxN2/3-2:foxN2/3-3:foxK1:foxK2:foxK3:gata123:gata456-3:gcm-2:gli-3:nkx6-2:hnf4:Hox4b:nerfin2-1:atmin:zscan2-4:Mef2-1:gtf2a1:Mef2-2:meis-1:smad1:smad9:…	64
46	dd_Smes_g4_1	7520898	7521292	395	*	k27ac_pooled_april21_peak_452	6.01659	Promoter	1	7522035	7523845	1811	1	MSTRG.308	SMEST027218001.1	-743	0.348993	0.187642	-0.669788	-0.608821	0	0	0			PRDM13	PR/SET domain 13 [Source:HGNC Symbol;Acc:HGNC:13998]	MSTRG.4403	hnf4	1	MSTRG.7896:MSTRG.9597:MSTRG.7998:MSTRG.23420:MSTRG.10410:SMESG000022963.1:MSTRG.5414:MSTRG.4288:MSTRG.4289:MSTRG.22163:MSTRG.16827:MSTRG.9571:MSTRG.624:MSTRG.11386:MSTRG.22087:MSTRG.10044:MSTRG.5025:MSTRG.20458:MSTRG.19091:MSTRG.9479:MSTRG.5625:MSTRG.2171:MSTRG.22528:MSTRG.19546:MSTRG.7741:MSTRG.22295:MSTRG.19765:MSTRG.3929:MSTRG.6819:MSTRG.11814:MSTRG.10087:MSTRG.20250:MSTRG.13758:MSTRG.18815:MS…	znf596:pax3/7-1:Lox5a:Lox5b:bsx:barhl1:tlx-1:hinfp-1:hinfp-2:rest-1:zfp674:znf-1:znf91:znf333-1:znf652:zscan2-2:zscan2-6:rest-2:coe:foxA(P):foxC1:foxC2:foxD1:foxD2:foxD3:foxF1 :foxF2:foxG:foxL1:foxO:pou-p1:foxP:foxN(P):foxQ/D:foxJ1-1:foxJ1-2:foxJ1-3:foxJ1-4:foxJ1-5:foxN2/3-1:foxN2/3-2:foxN2/3-3:foxK1:foxK2:foxK3:gcm-2:gli-1:gli-2:gli-3:prdm14:nkx6-2:nkx5-1:nerfin2-1:isl-1:isl-2:lbx:lhx1-3:lhx3:mu…	75
47	dd_Smes_g4_1	7521273	7521292	20	*	k27ac_pooled_april21_peak_453	7.26278	Promoter	1	7522035	7523845	1811	1	MSTRG.308	SMEST027218001.1	-743	0.348993	0.187642	-0.621235	-0.595783	0	0	0			PRDM13	PR/SET domain 13 [Source:HGNC Symbol;Acc:HGNC:13998]	MSTRG.4403	hnf4	1	MSTRG.7896:MSTRG.9597:MSTRG.7998:MSTRG.23420:MSTRG.10410:SMESG000022963.1:MSTRG.5414:MSTRG.4288:MSTRG.4289:MSTRG.22163:MSTRG.16827:MSTRG.9571:MSTRG.624:MSTRG.11386:MSTRG.22087:MSTRG.10044:MSTRG.5025:MSTRG.20458:MSTRG.19091:MSTRG.9479:MSTRG.5625:MSTRG.2171:MSTRG.22528:MSTRG.19546:MSTRG.7741:MSTRG.22295:MSTRG.19765:MSTRG.3929:MSTRG.6819:MSTRG.11814:MSTRG.10087:MSTRG.20250:MSTRG.13758:MSTRG.18815:MS…	znf596:pax3/7-1:Lox5a:Lox5b:bsx:barhl1:tlx-1:hinfp-1:hinfp-2:rest-1:zfp674:znf-1:znf91:znf333-1:znf652:zscan2-2:zscan2-6:rest-2:coe:foxA(P):foxC1:foxC2:foxD1:foxD2:foxD3:foxF1 :foxF2:foxG:foxL1:foxO:pou-p1:foxP:foxN(P):foxQ/D:foxJ1-1:foxJ1-2:foxJ1-3:foxJ1-4:foxJ1-5:foxN2/3-1:foxN2/3-2:foxN2/3-3:foxK1:foxK2:foxK3:gcm-2:gli-1:gli-2:prdm14:nkx6-2:nkx5-1:nerfin2-1:isl-1:isl-2:lbx:lhx1-3:lhx3:musculin…	76
48	dd_Smes_g4_1	7548117	7548404	288	*	k27ac_pooled_april21_peak_458	2.0745	Intron (SMEST027221002.1/MSTRG.310, intron 6 of 8)	1	7540585	7558189	17605	1	MSTRG.310	SMEST027221003.1	7532	6.26599	0.198668	-0.417649	-0.301404	1	1	1	0.0168926	-0.437159	RBPJ	recombination signal binding protein for immunoglobulin kappa J region [Source:HGNC Symbol;Acc:HGNC:5724]	MSTRG.5414:MSTRG.15991	tlx-1:phox	2	MSTRG.10887:MSTRG.7896:MSTRG.9597:MSTRG.6974:MSTRG.7998:MSTRG.23420:MSTRG.21923:MSTRG.9638:MSTRG.4288:MSTRG.4289:MSTRG.22163:MSTRG.16827:MSTRG.9571:MSTRG.624:MSTRG.11386:MSTRG.22087:MSTRG.10044:MSTRG.5025:MSTRG.20458:MSTRG.2221:MSTRG.2484:MSTRG.1218:MSTRG.9193:MSTRG.11379:MSTRG.22994:MSTRG.4327:MSTRG.19528:MSTRG.2656:MSTRG.2731:MSTRG.23472:MSTRG.22295:MSTRG.19765:MSTRG.10087:MSTRG.20250:MSTRG.233…	arnt-1:znf596:pax3/7-1:alx3-2:Lox5a:Lox5b:barhl2-1:barhl2-2:hinfp-1:hinfp-2:rest-1:zfp674:znf-1:znf91:znf333-1:znf652:zscan2-2:zscan2-6:rest-2:dbx:egr*-2:egr4-1:egr4-2:ets-5:fli-2:fli-3:ets-1:etv4:elf1:fli-1:foxF1 :foxF2:pou-p1:foxP:gata123:gata456-3:gcm-2:gli-1:gli-2:nkx6-2:hesl-2:Hox1:Hox4a:atmin:zscan2-4:lhx1-3:smad1:smad9:mitfl-3:nf-ya1:nf-ya2:nkx6-1:nr4a-1:nr4a-2:nr-1:nr2e1:tlx-2:onecut-1:on…	58
49	dd_Smes_g4_1	7548761	7548839	79	*	k27ac_pooled_april21_peak_458	2.0745	Intron (SMEST027221002.1/MSTRG.310, intron 6 of 8)	1	7540585	7558189	17605	1	MSTRG.310	SMEST027221003.1	8176	6.26599	0.198668	-0.417649	-0.301404	1	1	1	0.0168926	-0.437159	RBPJ	recombination signal binding protein for immunoglobulin kappa J region [Source:HGNC Symbol;Acc:HGNC:5724]	MSTRG.5414:MSTRG.4208:MSTRG.16892:a:MSTRG.15991	tlx-1:smad1:smad9:a:phox	4	MSTRG.10887:MSTRG.9597:MSTRG.6974:MSTRG.7998:MSTRG.23420:MSTRG.21923:MSTRG.9638:MSTRG.4288:MSTRG.4289:MSTRG.22163:MSTRG.16827:MSTRG.9571:MSTRG.624:MSTRG.11386:MSTRG.22087:MSTRG.10044:MSTRG.5025:MSTRG.20458:MSTRG.2221:MSTRG.2484:MSTRG.1218:MSTRG.9193:MSTRG.13758:MSTRG.18815:MSTRG.21195:SMESG000072873.1:MSTRG.19883:MSTRG.3843:MSTRG.5337:MSTRG.14880:MSTRG.5693:MSTRG.10837:MSTRG.18451:MSTRG.12975:MST…	arnt-1:pax3/7-1:alx3-2:Lox5a:Lox5b:barhl2-1:barhl2-2:hinfp-1:hinfp-2:rest-1:zfp674:znf-1:znf91:znf333-1:znf652:zscan2-2:zscan2-6:rest-2:dbx:egr*-2:egr4-1:egr4-2:foxN(P):foxQ/D:foxJ1-1:foxJ1-2:foxJ1-3:foxJ1-4:foxJ1-5:foxN2/3-1:foxN2/3-2:foxN2/3-3:foxK1:foxK2:foxK3:gcm-2:gli-1:gli-2:gli-3:gata456-1:gata456-2:gata456-4:prdm14:nkx6-2:hesl-2:Hox1:Hox4a:Hox3a:isl-1:isl-2:atmin:zscan2-4:cbt:klf-1:lbx:lh…	73
50	dd_Smes_g4_1	7548828	7549828	1001	*	k27ac_pooled_april21_peak_459	3.50447	Intron (SMEST027221002.1/MSTRG.310, intron 6 of 8)	1	7540585	7558189	17605	1	MSTRG.310	SMEST027221003.1	8243	6.26599	0.198668	-0.39215	-0.179332	1	1	1	0.0168926	-0.437159	RBPJ	recombination signal binding protein for immunoglobulin kappa J region [Source:HGNC Symbol;Acc:HGNC:5724]	MSTRG.5414:MSTRG.4208:MSTRG.16892:a:MSTRG.15991	tlx-1:smad1:smad9:a:phox	4	MSTRG.10887:MSTRG.9597:MSTRG.6974:MSTRG.7998:MSTRG.23420:MSTRG.21923:MSTRG.9638:MSTRG.4288:MSTRG.4289:MSTRG.22163:MSTRG.16827:MSTRG.9571:MSTRG.624:MSTRG.11386:MSTRG.22087:MSTRG.10044:MSTRG.5025:MSTRG.20458:MSTRG.2221:MSTRG.2484:MSTRG.1218:MSTRG.9193:MSTRG.2731:MSTRG.9479:MSTRG.13758:MSTRG.18815:MSTRG.21195:SMESG000072873.1:MSTRG.19883:MSTRG.3843:MSTRG.5337:MSTRG.14880:MSTRG.5693:MSTRG.10837:MSTRG…	arnt-1:pax3/7-1:alx3-2:Lox5a:Lox5b:barhl2-1:barhl2-2:hinfp-1:hinfp-2:rest-1:zfp674:znf-1:znf91:znf333-1:znf652:zscan2-2:zscan2-6:rest-2:dbx:egr*-2:egr4-1:egr4-2:elf1:foxA(P):foxN(P):foxQ/D:foxJ1-1:foxJ1-2:foxJ1-3:foxJ1-4:foxJ1-5:foxN2/3-1:foxN2/3-2:foxN2/3-3:foxK1:foxK2:foxK3:gcm-2:gli-1:gli-2:gli-3:gata456-1:gata456-2:gata456-4:prdm14:nkx6-2:hesl-2:Hox1:Hox4a:Hox3a:isl-1:isl-2:atmin:zscan2-4:cbt…	75
51	dd_Smes_g4_1	7996888	7997179	292	*	k27ac_pooled_april21_peak_507	8.67945	Distal Intergenic	1	8011676	8013404	1729	1	MSTRG.324	SMEST027280001.1	-14497	4.99101	0.40034	-0.338856	0.367937	0	0	0	0.734942	-0.156375	TRAF3	TNF receptor associated factor 3 [Source:HGNC Symbol;Acc:HGNC:12033]	MSTRG.1897:MSTRG.9898:MSTRG.23026:MSTRG.22628:MSTRG.1402:MSTRG.1743	meis-1:smad4-1:meis-2:tead1:six1/2-2:six1/2-3	5	MSTRG.7896:MSTRG.9597:MSTRG.6974:MSTRG.7998:MSTRG.23420:MSTRG.1217:MSTRG.4483:MSTRG.17936:MSTRG.4288:MSTRG.4289:MSTRG.22163:MSTRG.16827:MSTRG.9571:MSTRG.624:MSTRG.11386:MSTRG.22087:MSTRG.10044:MSTRG.5025:MSTRG.20458:MSTRG.22126:SMESG000049970.1:SMESG000031904.1:MSTRG.221:MSTRG.2221:MSTRG.19091:MSTRG.2484:MSTRG.1218:MSTRG.9193:MSTRG.10604:MSTRG.11379:MSTRG.22994:MSTRG.4327:MSTRG.19528:MSTRG.2656:M…	znf596:pax3/7-1:alx3-2:Lox5a:Lox5b:egr-5:znf362:zf-4:hinfp-1:hinfp-2:rest-1:zfp674:znf-1:znf91:znf333-1:znf652:zscan2-2:zscan2-6:rest-2:zfp560-1:zscan2-5:zscan2-8:zf-6:dbx:coe:egr*-2:egr4-1:egr4-2:ets-3:ets-5:fli-2:fli-3:ets-1:etv4:elf1:fli-1:foxA(P):foxC1:foxC2:foxD1:foxD2:foxD3:foxF1 :foxF2:foxG:foxL1:foxO:pou-p1:foxP:foxN(P):foxQ/D:foxJ1-1:foxJ1-2:foxJ1-3:foxJ1-4:foxJ1-5:foxN2/3-1:foxN2/3-2:fo…	78
52	dd_Smes_g4_1	8171966	8171973	8	*	k27ac_pooled_april21_peak_516	2.32228	Distal Intergenic	1	8168629	8169611	983	1	MSTRG.329	MSTRG.329.4	3337	6.80648	0.292727	-0.522719	-0.37657	0	0	0	0.816234	0.10197	TRAF2	TNF receptor associated factor 2 [Source:HGNC Symbol;Acc:HGNC:12032]	MSTRG.10887:MSTRG.21923:MSTRG.9638:MSTRG.19544:MSTRG.4288:MSTRG.4289:MSTRG.22163:MSTRG.16827:MSTRG.9571:MSTRG.624:MSTRG.11386:MSTRG.22087:MSTRG.10044:MSTRG.5025:MSTRG.20458:MSTRG.19091:MSTRG.2484:MSTRG.1218:MSTRG.9193:MSTRG.19528:MSTRG.2656:MSTRG.11405:MSTRG.22990:MSTRG.23304:MSTRG.8862:MSTRG.5535:MSTRG.17691:MSTRG.4403:MSTRG.12851:MSTRG.10177:MSTRG.7427:MSTRG.4208:MSTRG.16892:MSTRG.2717:MSTRG.14…	arnt-1:barhl2-1:barhl2-2:creb3l-1:hinfp-1:hinfp-2:rest-1:zfp674:znf-1:znf91:znf333-1:znf652:zscan2-2:zscan2-6:rest-2:coe:egr*-2:egr4-1:egr4-2:ets-1:etv4:gcm-2:gli-3:fezf2:gfi1:zfp541:zfhx3:hnf4:nerfin2-1:klf-3:lhx1-3:smad1:smad9:mitfl-3:nf-ya1:nf-ya2:nr-1:nr2e1:tlx-2:hr51:pax2/5/8-1:pitx:znf181:zbtb24:ski-1:zfp-7:rfx3:rfx4:gtf2b-4:kdm5b:ctcf:zfp-10:zfp677:srebp:Tbx-1/10:Tbx-20:znf143:zic-1:zic-2:…	46	MSTRG.10887:MSTRG.10410:SMESG000022963.1:MSTRG.12684:MSTRG.2221:MSTRG.10604:MSTRG.11379:MSTRG.22994:MSTRG.4327:MSTRG.2731:MSTRG.23472:MSTRG.3741:MSTRG.13843:MSTRG.19305:MSTRG.17155:SMESG000049967.1:MSTRG.15979:MSTRG.1469:MSTRG.8925:MSTRG.4330:MSTRG.14931:MSTRG.12358:MSTRG.19417:MSTRG.432:MSTRG.21315:MSTRG.6529:MSTRG.3802:MSTRG.6003:a:MSTRG.3166:MSTRG.7853:MSTRG.4161:MSTRG.1496:MSTRG.16685:MSTRG.1…	arnt-1:bsx:barhl1:nkx5-3:dbx:ets-3:ets-5:fli-2:fli-3:elf1:fli-1:hesl-3:Hox4b:hesl-2:atmin:zscan2-4:klf-1:lhx2-3:sall4:fir1:zfp-8:zfp236-1:zfp354:znf101:znf425:znf660:lmpt-3:nkx2l-1:a:onecut-1:onecut-2:onecut-3:onecut-5:hnf6:cux-2:Xfin:zfp-4:zbed-1:zf-5:klf-2:sp6-9:sp8:six3:six6-2:six6-3:Tbx-2/3a:Tbx-2/3c:yy2:zbed8:zfp-2:zfp236-2:zfp560-2:znf799:zscan2-1:egr4-3:foxA1:foxA2:arx:onecut-4:nkx1:nkx1-1…	32
53	dd_Smes_g4_1	8415772	8416133	362	*	k27ac_pooled_april21_peak_523	5.63764	Promoter	1	8415169	8416341	1173	1	MSTRG.340	MSTRG.340.4	603	16.6365	0.216419	-0.372559	-0.118969	0	0	0	0.925251	0.0370219	PUDP	pseudouridine 5'-phosphatase [Source:HGNC Symbol;Acc:HGNC:16818]	-	-	0	MSTRG.9597:MSTRG.7998:MSTRG.23420:SMESG000022963.1:MSTRG.5414:MSTRG.12684:MSTRG.19544:MSTRG.4288:MSTRG.4289:MSTRG.22163:MSTRG.16827:MSTRG.9571:MSTRG.624:MSTRG.11386:MSTRG.22087:MSTRG.10044:MSTRG.5025:MSTRG.20458:MSTRG.19091:MSTRG.2484:MSTRG.1218:MSTRG.9193:MSTRG.11379:MSTRG.22994:MSTRG.4327:MSTRG.2656:MSTRG.2731:MSTRG.10087:MSTRG.20250:MSTRG.22990:MSTRG.23304:MSTRG.8862:MSTRG.5535:MSTRG.17691:MST…	pax3/7-1:Lox5a:Lox5b:barhl1:tlx-1:nkx5-3:creb3l-1:hinfp-1:hinfp-2:rest-1:zfp674:znf-1:znf91:znf333-1:znf652:zscan2-2:zscan2-6:rest-2:coe:egr*-2:egr4-1:egr4-2:ets-5:fli-2:fli-3:etv4:elf1:pou-p1:foxP:gli-3:fezf2:gfi1:zfp541:zfhx3:hesl-3:nkx6-2:hesl-2:nkx3-1:nkx5-2:nkx5-1:nerfin2-1:isl-1:isl-2:atmin:zscan2-4:cbt:klf-3:klf-1:lbx:lmx1-1:lhx1-3:lhx3:Mef2-1:gtf2a1:Mef2-2:musculin:smad1:smad9:nf-ya1:nf-y…	78
54	dd_Smes_g4_1	8619715	8620230	516	*	k27ac_pooled_april21_peak_572	6.60788	Distal Intergenic	1	8635150	8729769	94620	1	MSTRG.341	SMEST025327001.1	-14920	0.0623668	0.0187398	-0.481681	-0.371993	0	0	0			LAMA5	laminin subunit alpha 5 [Source:HGNC Symbol;Acc:HGNC:6485]	-	-	0	MSTRG.7896:MSTRG.7998:MSTRG.23420:MSTRG.10410:SMESG000022963.1:MSTRG.12684:MSTRG.19544:MSTRG.4288:MSTRG.4289:MSTRG.22163:MSTRG.16827:MSTRG.9571:MSTRG.624:MSTRG.11386:MSTRG.22087:MSTRG.10044:MSTRG.5025:MSTRG.20458:MSTRG.22126:SMESG000049970.1:SMESG000031904.1:MSTRG.221:MSTRG.11379:MSTRG.22994:MSTRG.4327:MSTRG.2656:MSTRG.9479:MSTRG.5625:MSTRG.2171:MSTRG.18451:MSTRG.12975:MSTRG.17474:MSTRG.16138:MST…	znf596:Lox5a:Lox5b:bsx:barhl1:nkx5-3:creb3l-1:hinfp-1:hinfp-2:rest-1:zfp674:znf-1:znf91:znf333-1:znf652:zscan2-2:zscan2-6:rest-2:zfp560-1:zscan2-5:zscan2-8:zf-6:ets-5:fli-2:fli-3:etv4:foxA(P):foxC1:foxC2:foxK1:foxK2:foxK3:prdm14:nkx6-2:Hox4b:hesl-2:nkx3-1:nkx5-2:nkx5-1:Hox3a:atmin:zscan2-4:cbt:klf-3:klf-1:lbx:lhx2-3:lmx1-1:lhx1-3:lhx3:meis-1:musculin:msx:smad1:smad9:myoD:neuroD-1:fer3l-3:nf-ya1:n…	77
55	dd_Smes_g4_1	8667118	8667548	431	*	k27ac_pooled_april21_peak_581	7.73029	Intron (SMEST025327001.1/MSTRG.341, intron 1 of 13)	1	8689479	8714834	25356	1	MSTRG.341	MSTRG.341.2	-21931	0.0623668	0.0187398	-0.128404	0.00713529	0	0	0			LAMA5	laminin subunit alpha 5 [Source:HGNC Symbol;Acc:HGNC:6485]	-	-	0	MSTRG.7896:MSTRG.7998:MSTRG.23420:MSTRG.21923:MSTRG.9638:SMESG000022963.1:MSTRG.1217:MSTRG.4483:MSTRG.17936:MSTRG.12684:MSTRG.19544:MSTRG.4288:MSTRG.4289:MSTRG.22163:MSTRG.16827:MSTRG.9571:MSTRG.624:MSTRG.11386:MSTRG.22087:MSTRG.10044:MSTRG.5025:MSTRG.20458:MSTRG.2484:MSTRG.1218:MSTRG.9193:MSTRG.10604:MSTRG.5625:MSTRG.2171:MSTRG.22528:MSTRG.19546:MSTRG.7741:MSTRG.22295:MSTRG.19765:MSTRG.3929:MSTR…	znf596:Lox5a:Lox5b:barhl2-1:barhl2-2:barhl1:egr-5:znf362:zf-4:nkx5-3:creb3l-1:hinfp-1:hinfp-2:rest-1:zfp674:znf-1:znf91:znf333-1:znf652:zscan2-2:zscan2-6:rest-2:egr*-2:egr4-1:egr4-2:ets-3:foxC1:foxC2:foxD1:foxD2:foxD3:foxF1 :foxF2:foxG:foxL1:foxO:pou-p1:foxP:foxN(P):foxQ/D:foxJ1-1:foxJ1-2:foxJ1-3:foxJ1-4:foxJ1-5:foxN2/3-1:foxN2/3-2:foxN2/3-3:gcm-2:gli-1:gli-2:gli-3:nkx6-2:nerfin2-1:atmin:zscan2-4…	79
56	dd_Smes_g4_1	9522579	9523380	802	*	k27ac_pooled_april21_peak_630	6.41648	Distal Intergenic	1	9508226	9520344	12119	2	MSTRG.379	MSTRG.379.1	-2235	0.0373933	0.0122139	-0.430302	-0.440944	0	0	0			PNCK	pregnancy up-regulated nonubiquitous CaM kinase [Source:HGNC Symbol;Acc:HGNC:13415]	MSTRG.4403:MSTRG.23136:MSTRG.11197:MSTRG.22732:MSTRG.308:MSTRG.1201:MSTRG.8933:MSTRG.3339	hnf4:hr51:egr-1:ovo-1:prdm13:gl:znf341:onecut-4	4	MSTRG.7998:MSTRG.23420:MSTRG.21923:MSTRG.9638:MSTRG.4288:MSTRG.4289:MSTRG.22163:MSTRG.16827:MSTRG.9571:MSTRG.624:MSTRG.11386:MSTRG.22087:MSTRG.10044:MSTRG.5025:MSTRG.20458:MSTRG.2221:MSTRG.2484:MSTRG.1218:MSTRG.9193:MSTRG.10604:MSTRG.5625:MSTRG.2171:MSTRG.18451:MSTRG.12975:MSTRG.17474:MSTRG.22990:MSTRG.23304:MSTRG.8862:MSTRG.5535:MSTRG.17691:MSTRG.16138:MSTRG.7287:MSTRG.13843:MSTRG.19305:MSTRG.17…	Lox5a:Lox5b:barhl2-1:barhl2-2:hinfp-1:hinfp-2:rest-1:zfp674:znf-1:znf91:znf333-1:znf652:zscan2-2:zscan2-6:rest-2:dbx:egr*-2:egr4-1:egr4-2:ets-3:foxC1:foxC2:foxK1:foxK2:foxK3:gli-3:fezf2:gfi1:zfp541:zfhx3:prdm14:nkx6-2:Hox4b:hesl-2:atmin:zscan2-4:cbt:klf-1:egr-2:meis-1:mlx:musculin:smad1:smad9:nf-ya1:nf-ya2:nkx6-1:nr2f1:nr4a-1:nr4a-2:onecut-1:onecut-2:onecut-3:onecut-5:hnf6:cux-2:pou4-1:pou4-2:zfp…	49
57	dd_Smes_g4_1	9523307	9523380	74	*	k27ac_pooled_april21_peak_631	4.52452	Distal Intergenic	1	9508226	9520344	12119	2	MSTRG.379	MSTRG.379.1	-2963	0.0373933	0.0122139	-0.423372	-0.360755	0	0	0			PNCK	pregnancy up-regulated nonubiquitous CaM kinase [Source:HGNC Symbol;Acc:HGNC:13415]	MSTRG.18649:MSTRG.4755	Pbx-4:Prep	2	MSTRG.7896:MSTRG.7998:MSTRG.23420:MSTRG.21923:MSTRG.9638:MSTRG.19544:MSTRG.4288:MSTRG.4289:MSTRG.22163:MSTRG.16827:MSTRG.9571:MSTRG.624:MSTRG.11386:MSTRG.22087:MSTRG.10044:MSTRG.5025:MSTRG.20458:MSTRG.2484:MSTRG.1218:MSTRG.9193:MSTRG.10604:MSTRG.5625:MSTRG.2171:MSTRG.22295:MSTRG.19765:MSTRG.16138:MSTRG.7287:MSTRG.13843:MSTRG.19305:MSTRG.17155:SMESG000049967.1:MSTRG.10215:MSTRG.15979:MSTRG.1897:MS…	znf596:Lox5a:Lox5b:barhl2-1:barhl2-2:creb3l-1:hinfp-1:hinfp-2:rest-1:zfp674:znf-1:znf91:znf333-1:znf652:zscan2-2:zscan2-6:rest-2:egr*-2:egr4-1:egr4-2:ets-3:foxC1:foxC2:foxF1 :foxF2:prdm14:nkx6-2:Hox4b:hesl-2:atmin:zscan2-4:cbt:klf-1:meis-1:mlx:musculin:smad1:smad9:nf-ya1:nf-ya2:a:nkx6-1:nr2f1:nr4a-1:nr4a-2:onecut-1:onecut-2:onecut-3:onecut-5:hnf6:cux-2:pax2/5/8-1:pou4-1:pou4-2:zfp-7:gtf2b-4:kdm5b…	56
58	dd_Smes_g4_1	9523630	9523831	202	*	k27ac_pooled_april21_peak_631	4.52452	Distal Intergenic	1	9508226	9520344	12119	2	MSTRG.379	MSTRG.379.1	-3286	0.0373933	0.0122139	-0.423372	-0.360755	0	0	0			PNCK	pregnancy up-regulated nonubiquitous CaM kinase [Source:HGNC Symbol;Acc:HGNC:13415]	MSTRG.6003:a:MSTRG.18649:MSTRG.4755:MSTRG.7450:MSTRG.5557:MSTRG.572:MSTRG.18286:MSTRG.5778:MSTRG.1647	nkx2l-1:a:Pbx-4:Prep:irx-1:irx6-1:irx6-2:irx6-3:ovo-2:ovo-3	6	MSTRG.7896:MSTRG.21923:MSTRG.9638:MSTRG.5414:MSTRG.19544:MSTRG.4288:MSTRG.4289:MSTRG.22163:MSTRG.16827:MSTRG.9571:MSTRG.624:MSTRG.11386:MSTRG.22087:MSTRG.10044:MSTRG.5025:MSTRG.20458:MSTRG.2484:MSTRG.1218:MSTRG.9193:MSTRG.11379:MSTRG.22994:MSTRG.4327:MSTRG.19528:MSTRG.2656:MSTRG.23472:MSTRG.5625:MSTRG.2171:MSTRG.22295:MSTRG.19765:MSTRG.16138:MSTRG.13843:MSTRG.19305:MSTRG.17155:SMESG000049967.1:MS…	znf596:barhl2-1:barhl2-2:tlx-1:creb3l-1:hinfp-1:hinfp-2:rest-1:zfp674:znf-1:znf91:znf333-1:znf652:zscan2-2:zscan2-6:rest-2:egr*-2:egr4-1:egr4-2:ets-5:fli-2:fli-3:ets-1:etv4:fli-1:foxC1:foxC2:foxF1 :foxF2:prdm14:Hox4b:hesl-2:atmin:zscan2-4:cbt:klf-1:meis-1:mlx:musculin:smad1:smad9:nr2f1:nr4a-1:nr4a-2:onecut-1:onecut-2:onecut-3:onecut-5:hnf6:cux-2:pax2/5/8-1:pou4-1:pou4-2:gtf2b-4:ctcf:zfp-10:zfp677…	51
59	dd_Smes_g4_1	9524199	9524307	109	*	k27ac_pooled_april21_peak_631	4.52452	Distal Intergenic	1	9508226	9520344	12119	2	MSTRG.379	MSTRG.379.1	-3855	0.0373933	0.0122139	-0.423372	-0.360755	0	0	0			PNCK	pregnancy up-regulated nonubiquitous CaM kinase [Source:HGNC Symbol;Acc:HGNC:13415]	MSTRG.6003:a:MSTRG.18649:MSTRG.4755:MSTRG.7450:MSTRG.5557:MSTRG.572:MSTRG.18286:MSTRG.5778:MSTRG.1647	nkx2l-1:a:Pbx-4:Prep:irx-1:irx6-1:irx6-2:irx6-3:ovo-2:ovo-3	6	MSTRG.10887:MSTRG.7896:MSTRG.5414:MSTRG.12684:MSTRG.19544:MSTRG.20458:MSTRG.14008:MSTRG.2484:MSTRG.1218:MSTRG.9193:MSTRG.11379:MSTRG.22994:MSTRG.4327:MSTRG.19528:MSTRG.2656:MSTRG.23472:MSTRG.22295:MSTRG.19765:MSTRG.3741:MSTRG.13843:MSTRG.23578:MSTRG.20904:MSTRG.17155:SMESG000049967.1:MSTRG.10215:MSTRG.15979:MSTRG.1469:MSTRG.12466:MSTRG.1897:MSTRG.372:MSTRG.6445:MSTRG.6954:MSTRG.4208:MSTRG.16892:M…	arnt-1:znf596:tlx-1:nkx5-3:creb3l-1:rest-2:dll-1:egr*-2:egr4-1:egr4-2:ets-5:fli-2:fli-3:ets-1:etv4:fli-1:foxF1 :foxF2:hesl-3:Hox4b:Hox1:Hox4a:atmin:zscan2-4:cbt:klf-1:lhx2-3:lmx1-1:meis-1:mlx:musculin:msx:smad1:smad9:mitfl-3:myoD:nr2f1:nr4a-1:nr4a-2:onecut-1:onecut-2:onecut-3:onecut-5:hnf6:cux-2:pax2/5/8-1:pou4-1:pou4-2:gtf2b-4:ctcf:zfp-10:zfp677:shox:sp5:klf-2:sp6-9:sp8:six4:tal:ptf-4:da:ap4-1:m…	60
60	dd_Smes_g4_1	9524199	9524486	288	*	k27ac_pooled_april21_peak_632	5.67089	Distal Intergenic	1	9508226	9520344	12119	2	MSTRG.379	MSTRG.379.1	-3855	0.0373933	0.0122139	-0.182114	-0.0387535	0	0	0			PNCK	pregnancy up-regulated nonubiquitous CaM kinase [Source:HGNC Symbol;Acc:HGNC:13415]	MSTRG.6003:a:MSTRG.18649:MSTRG.4755:MSTRG.7450:MSTRG.5557:MSTRG.572:MSTRG.18286:MSTRG.5778:MSTRG.1647	nkx2l-1:a:Pbx-4:Prep:irx-1:irx6-1:irx6-2:irx6-3:ovo-2:ovo-3	6	MSTRG.10887:MSTRG.7896:MSTRG.5414:MSTRG.12684:MSTRG.19544:MSTRG.20458:MSTRG.14008:MSTRG.2484:MSTRG.1218:MSTRG.9193:MSTRG.11379:MSTRG.22994:MSTRG.4327:MSTRG.19528:MSTRG.2656:MSTRG.23472:MSTRG.22295:MSTRG.19765:MSTRG.3741:MSTRG.13843:MSTRG.23578:MSTRG.20904:MSTRG.17155:SMESG000049967.1:MSTRG.10215:MSTRG.15979:MSTRG.1469:MSTRG.12466:MSTRG.1897:MSTRG.372:MSTRG.6445:MSTRG.6954:MSTRG.4208:MSTRG.16892:M…	arnt-1:znf596:tlx-1:nkx5-3:creb3l-1:rest-2:dll-1:egr*-2:egr4-1:egr4-2:ets-5:fli-2:fli-3:ets-1:etv4:fli-1:foxF1 :foxF2:hesl-3:Hox4b:Hox1:Hox4a:atmin:zscan2-4:cbt:klf-1:lhx2-3:lmx1-1:meis-1:mlx:musculin:msx:smad1:smad9:mitfl-3:myoD:nr2f1:nr4a-1:nr4a-2:onecut-1:onecut-2:onecut-3:onecut-5:hnf6:cux-2:pax2/5/8-1:pou4-1:pou4-2:gtf2b-4:ctcf:zfp-10:zfp677:shox:sp5:klf-2:sp6-9:sp8:six4:tal:ptf-4:da:ap4-1:m…	60
61	dd_Smes_g4_1	9530764	9531413	650	*	k27ac_pooled_april21_peak_636	6.6465	Promoter	1	9524837	9530588	5752	2	MSTRG.385	SMEST025422001.1	-176	80.4801	0.250766	-0.251525	-0.0717344	0	0	0	0.945641	0.020822	JAG1	jagged canonical Notch ligand 1 [Source:HGNC Symbol;Acc:HGNC:6188]	-	-	0	MSTRG.10410:MSTRG.12684:MSTRG.19544:MSTRG.9479:MSTRG.5625:MSTRG.2171:MSTRG.22528:MSTRG.19546:MSTRG.7741:MSTRG.3929:MSTRG.6819:MSTRG.11814:MSTRG.10087:MSTRG.20250:MSTRG.13758:MSTRG.18815:MSTRG.21195:SMESG000072873.1:MSTRG.19883:MSTRG.3843:MSTRG.5337:MSTRG.14880:MSTRG.5693:MSTRG.10837:MSTRG.18451:MSTRG.12975:MSTRG.17474:MSTRG.23309:MSTRG.9120:MSTRG.11405:MSTRG.12700:MSTRG.8018:MSTRG.11935:MSTRG.374…	bsx:nkx5-3:creb3l-1:foxA(P):foxC1:foxC2:foxD1:foxD2:foxD3:foxG:foxL1:foxO:pou-p1:foxP:foxN(P):foxQ/D:foxJ1-1:foxJ1-2:foxJ1-3:foxJ1-4:foxJ1-5:foxN2/3-1:foxN2/3-2:foxN2/3-3:foxK1:foxK2:foxK3:gata123:gata456-3:gcm-2:gata456-1:gata456-2:gata456-4:hesl-3:nkx5-1:nerfin2-1:lhx2-3:lhx1-3:Mef2-1:gtf2a1:Mef2-2:meis-1:mlx:msx:nf-ya1:nf-ya2:nkx2l-1:a:nr-1:nr2e1:tlx-2:Pbx-4:Prep:znf181:zbtb24:ski-1:ctcf:zfp-1…	59
62	dd_Smes_g4_1	9532427	9532461	35	*	k27ac_pooled_april21_peak_637	3.89322	Intron (MSTRG.385.1/MSTRG.385, intron 6 of 9)	1	9524837	9530588	5752	2	MSTRG.385	SMEST025422001.1	-1839	80.4801	0.250766	-0.369547	-0.239566	0	0	0	0.945641	0.020822	JAG1	jagged canonical Notch ligand 1 [Source:HGNC Symbol;Acc:HGNC:6188]	-	-	0	MSTRG.10887:MSTRG.7896:MSTRG.7998:MSTRG.23420:MSTRG.21923:MSTRG.9638:MSTRG.23513:MSTRG.12684:MSTRG.19544:MSTRG.20458:MSTRG.2221:MSTRG.22528:MSTRG.19546:MSTRG.7741:MSTRG.22295:MSTRG.19765:MSTRG.3929:MSTRG.6819:MSTRG.11814:MSTRG.10087:MSTRG.20250:MSTRG.13758:MSTRG.18815:MSTRG.21195:SMESG000072873.1:MSTRG.19883:MSTRG.3843:MSTRG.5337:MSTRG.14880:MSTRG.5693:MSTRG.10837:MSTRG.18451:MSTRG.12975:MSTRG.17…	arnt-1:znf596:Lox5a:Lox5b:barhl2-1:barhl2-2:e22/23:nkx5-3:creb3l-1:rest-2:dbx:foxD1:foxD2:foxD3:foxF1 :foxF2:foxG:foxL1:foxO:pou-p1:foxP:foxN(P):foxQ/D:foxJ1-1:foxJ1-2:foxJ1-3:foxJ1-4:foxJ1-5:foxN2/3-1:foxN2/3-2:foxN2/3-3:foxK1:foxK2:foxK3:gata123:gata456-3:gcm-2:gli-3:gata456-1:gata456-2:gata456-4:prdm14:hesl-3:nkx6-2:nerfin2-1:klf-3:klf-1:lhx1-3:meis-1:mlx:musculin:sall4:fir1:zfp-8:zfp236-1:zfp…	70
63	dd_Smes_g4_1	10712943	10713280	338	*	k27ac_pooled_april21_peak_673	3.40626	Distal Intergenic	1	10699535	10708710	9176	2	MSTRG.431	MSTRG.431.1	-4233	0	0	-0.652334	-0.961823	0	0	0			ZNF518B	zinc finger protein 518B [Source:HGNC Symbol;Acc:HGNC:29365]	-	-	0	MSTRG.7896:MSTRG.7998:MSTRG.23420:MSTRG.21923:MSTRG.9638:SMESG000022963.1:MSTRG.1217:MSTRG.4483:MSTRG.17936:MSTRG.12684:MSTRG.2221:MSTRG.14008:MSTRG.19091:MSTRG.2484:MSTRG.1218:MSTRG.9193:MSTRG.11379:MSTRG.22994:MSTRG.4327:MSTRG.19528:MSTRG.2656:MSTRG.2731:MSTRG.23472:MSTRG.5625:MSTRG.2171:MSTRG.20466:MSTRG.17923:MSTRG.22990:MSTRG.7287:MSTRG.13843:MSTRG.7792:MSTRG.6856:MSTRG.10215:MSTRG.15979:MST…	znf596:Lox5a:Lox5b:barhl2-1:barhl2-2:barhl1:egr-5:znf362:zf-4:nkx5-3:dbx:dll-1:coe:egr*-2:egr4-1:egr4-2:ets-5:fli-2:fli-3:ets-1:etv4:elf1:fli-1:foxC1:foxC2:gli-1:gli-2:gli-3:nkx6-2:Hox4b:nkx3-1:nkx5-2:cbt:klf-1:lbx:lhx2-1:lhx2-4:lmx1-1:lhx1-3:lhx3:meis-1:musculin:sall4:fir1:zfp-8:zfp236-1:zfp354:znf101:znf425:znf660:lmpt-3:myoD:nkx2l-1:a:nr-1:nr2e1:tlx-2:pitx:pou1:pou4-1:pou4-2:rfx4:ctcf:zfp-10:z…	62
64	dd_Smes_g4_1	10713629	10714456	828	*	k27ac_pooled_april21_peak_674	6.19022	Distal Intergenic	1	10699535	10708710	9176	2	MSTRG.431	MSTRG.431.1	-4919	0	0	-0.591564	-0.832823	0	0	0			ZNF518B	zinc finger protein 518B [Source:HGNC Symbol;Acc:HGNC:29365]	MSTRG.22352:MSTRG.2646	pou2/3-1:pou2/3-2	1	MSTRG.7896:MSTRG.7998:MSTRG.23420:MSTRG.21923:MSTRG.9638:SMESG000022963.1:MSTRG.1217:MSTRG.4483:MSTRG.17936:MSTRG.12684:MSTRG.20458:MSTRG.22126:SMESG000049970.1:SMESG000031904.1:MSTRG.221:MSTRG.2221:MSTRG.14008:MSTRG.19091:MSTRG.2484:MSTRG.1218:MSTRG.9193:MSTRG.10604:MSTRG.11379:MSTRG.22994:MSTRG.4327:MSTRG.19528:MSTRG.2656:MSTRG.2731:MSTRG.23472:MSTRG.5625:MSTRG.2171:MSTRG.22528:MSTRG.19546:MSTR…	znf596:Lox5a:Lox5b:barhl2-1:barhl2-2:barhl1:egr-5:znf362:zf-4:nkx5-3:rest-2:zfp560-1:zscan2-5:zscan2-8:zf-6:dbx:dll-1:coe:egr*-2:egr4-1:egr4-2:ets-3:ets-5:fli-2:fli-3:ets-1:etv4:elf1:fli-1:foxC1:foxC2:foxD1:foxD2:foxD3:foxG:foxL1:foxO:pou-p1:foxP:foxQ/D:foxJ1-1:foxJ1-2:foxJ1-3:foxJ1-4:foxJ1-5:foxN2/3-1:foxN2/3-2:foxN2/3-3:gcm-2:gli-1:gli-2:gli-3:nkx6-2:hnf4:Hox4b:hesl-2:atmin:zscan2-4:cbt:klf-1:l…	87
65	dd_Smes_g4_1	10725582	10726037	456	*	k27ac_pooled_april21_peak_683	3.88664	Promoter	1	10720217	10725751	5535	2	MSTRG.432	SMEST025574001.1	0	1.52994	0.272178	-0.206837	-0.0408044	0	0	0	0.189942	0.311478	ZNF384	zinc finger protein 384 [Source:HGNC Symbol;Acc:HGNC:11955]	MSTRG.4288:MSTRG.4289:MSTRG.22163:MSTRG.16827:MSTRG.9571:MSTRG.624:MSTRG.11386:MSTRG.22087:MSTRG.10044:MSTRG.5025:MSTRG.4403:MSTRG.19305:MSTRG.12851:MSTRG.17155:SMESG000049967.1:MSTRG.10215:MSTRG.10177:MSTRG.15979:MSTRG.14130:MSTRG.3824:MSTRG.5260:MSTRG.23512:MSTRG.9977:MSTRG.7606:MSTRG.396:MSTRG.15425:MSTRG.19918:MSTRG.2722:MSTRG.7487:MSTRG.16036:MSTRG.11197:MSTRG.22732:MSTRG.308:MSTRG.1201:MSTR…	hinfp-1:hinfp-2:rest-1:zfp674:znf-1:znf91:znf333-1:znf652:zscan2-2:zscan2-6:hnf4:hesl-2:nerfin2-1:atmin:zscan2-4:cbt:klf-3:klf-1:nf-ya1:nf-ya2:ctcf:zfp-10:zfp677:sp5:klf-2:sp6-9:sp8:znf143:zic-1:zic-2:egr-1:ovo-1:prdm13:gl:znf341:znf180:zscan2-3	17	MSTRG.7896:MSTRG.7998:MSTRG.23420:MSTRG.5414:MSTRG.12684:MSTRG.20458:MSTRG.22126:SMESG000049970.1:SMESG000031904.1:MSTRG.221:MSTRG.2221:MSTRG.10604:MSTRG.11379:MSTRG.22994:MSTRG.4327:MSTRG.19528:MSTRG.2656:MSTRG.2731:MSTRG.23472:MSTRG.9479:MSTRG.5625:MSTRG.2171:MSTRG.22528:MSTRG.19546:MSTRG.7741:MSTRG.22295:MSTRG.19765:MSTRG.3929:MSTRG.6819:MSTRG.11814:MSTRG.18815:MSTRG.21195:SMESG000072873.1:MST…	znf596:Lox5a:Lox5b:tlx-1:nkx5-3:rest-2:zfp560-1:zscan2-5:zscan2-8:zf-6:dbx:ets-3:ets-5:fli-2:fli-3:ets-1:etv4:elf1:fli-1:foxA(P):foxC1:foxC2:foxD1:foxD2:foxD3:foxF1 :foxF2:foxG:foxL1:foxO:foxQ/D:foxJ1-1:foxJ1-2:foxJ1-3:foxJ1-4:foxJ1-5:foxN2/3-1:foxN2/3-2:foxN2/3-3:foxK1:foxK2:foxK3:gcm-2:gli-1:gli-2:prdm14:nkx6-2:Hox4b:lbx:lhx2-3:lmx1-1:lhx1-3:lhx3:msx:mitfl-3:myoD:nr2f1:nr-1:nr2e1:tlx-2:hr51:neu…	74
66	dd_Smes_g4_1	11224341	11224950	610	*	k27ac_pooled_april21_peak_708	1.32612	Promoter	1	11224315	11224801	487	1	MSTRG.440	MSTRG.440.3	26	0.200279	0.00438393	-0.021605	-0.81808	0	0	0			-	-	-	-	0	MSTRG.7998:MSTRG.23420:MSTRG.21923:MSTRG.9638:MSTRG.4288:MSTRG.4289:MSTRG.22163:MSTRG.16827:MSTRG.9571:MSTRG.624:MSTRG.11386:MSTRG.22087:MSTRG.10044:MSTRG.5025:MSTRG.2221:MSTRG.19091:MSTRG.2484:MSTRG.1218:MSTRG.9193:MSTRG.9479:MSTRG.5625:MSTRG.2171:MSTRG.22528:MSTRG.19546:MSTRG.7741:MSTRG.22295:MSTRG.19765:MSTRG.3929:MSTRG.6819:MSTRG.11814:MSTRG.10087:MSTRG.20250:MSTRG.13758:MSTRG.18815:MSTRG.211…	Lox5a:Lox5b:barhl2-1:barhl2-2:hinfp-1:hinfp-2:rest-1:zfp674:znf-1:znf91:znf333-1:znf652:zscan2-2:zscan2-6:dbx:coe:egr*-2:egr4-1:egr4-2:foxA(P):foxC1:foxC2:foxD1:foxD2:foxD3:foxF1 :foxF2:foxG:foxL1:foxO:pou-p1:foxP:foxN(P):foxQ/D:foxJ1-1:foxJ1-2:foxJ1-3:foxJ1-4:foxJ1-5:foxN2/3-1:foxN2/3-2:foxN2/3-3:foxK1:foxK2:foxK3:gata123:gata456-3:gli-3:hesl-3:nkx6-2:hnf4:hesl-2:nerfin2-1:cbt:meis-1:sall4:fir1:…	61
67	dd_Smes_g4_1	11235011	11235316	306	*	k27ac_pooled_april21_peak_711	3.69099	Promoter	1	11234650	11237544	2895	1	MSTRG.442	MSTRG.442.4	361	1.64565	0.632688	-0.708259	-0.802301	0	0	0	0.338884	-0.81644	HOXD3	homeobox D3 [Source:HGNC Symbol;Acc:HGNC:5137]	-	-	0	MSTRG.23513:MSTRG.5414:MSTRG.4288:MSTRG.4289:MSTRG.22163:MSTRG.16827:MSTRG.9571:MSTRG.624:MSTRG.11386:MSTRG.22087:MSTRG.10044:MSTRG.5025:MSTRG.20458:MSTRG.2221:MSTRG.2484:MSTRG.1218:MSTRG.9193:MSTRG.11379:MSTRG.22994:MSTRG.4327:MSTRG.19528:MSTRG.2656:MSTRG.2731:MSTRG.23472:MSTRG.5625:MSTRG.2171:MSTRG.10087:MSTRG.20250:MSTRG.13758:MSTRG.18815:MSTRG.21195:SMESG000072873.1:MSTRG.19883:MSTRG.3843:MST…	e22/23:tlx-1:hinfp-1:hinfp-2:rest-1:zfp674:znf-1:znf91:znf333-1:znf652:zscan2-2:zscan2-6:rest-2:dbx:egr*-2:egr4-1:egr4-2:ets-5:fli-2:fli-3:ets-1:etv4:elf1:fli-1:foxC1:foxC2:pou-p1:foxP:foxN(P):foxQ/D:foxJ1-1:foxJ1-2:foxJ1-3:foxJ1-4:foxJ1-5:foxN2/3-1:foxN2/3-2:foxN2/3-3:foxK1:foxK2:foxK3:gata123:gata456-3:gcm-2:gata456-1:gata456-2:gata456-4:hesl-2:atmin:zscan2-4:cbt:klf-3:klf-1:lhx1-3:musculin:sma…	66
68	dd_Smes_g4_1	11235011	11235448	438	*	k27ac_pooled_april21_peak_712	5.21093	Promoter	1	11234650	11237544	2895	1	MSTRG.442	MSTRG.442.4	361	1.64565	0.632688	-0.708259	-0.802301	0	0	0	0.338884	-0.81644	HOXD3	homeobox D3 [Source:HGNC Symbol;Acc:HGNC:5137]	-	-	0	MSTRG.23513:MSTRG.5414:MSTRG.4288:MSTRG.4289:MSTRG.22163:MSTRG.16827:MSTRG.9571:MSTRG.624:MSTRG.11386:MSTRG.22087:MSTRG.10044:MSTRG.5025:MSTRG.20458:MSTRG.2221:MSTRG.2484:MSTRG.1218:MSTRG.9193:MSTRG.11379:MSTRG.22994:MSTRG.4327:MSTRG.19528:MSTRG.2656:MSTRG.2731:MSTRG.23472:MSTRG.5625:MSTRG.2171:MSTRG.10087:MSTRG.20250:MSTRG.13758:MSTRG.18815:MSTRG.21195:SMESG000072873.1:MSTRG.19883:MSTRG.3843:MST…	e22/23:tlx-1:hinfp-1:hinfp-2:rest-1:zfp674:znf-1:znf91:znf333-1:znf652:zscan2-2:zscan2-6:rest-2:dbx:egr*-2:egr4-1:egr4-2:ets-5:fli-2:fli-3:ets-1:etv4:elf1:fli-1:foxC1:foxC2:pou-p1:foxP:foxN(P):foxQ/D:foxJ1-1:foxJ1-2:foxJ1-3:foxJ1-4:foxJ1-5:foxN2/3-1:foxN2/3-2:foxN2/3-3:foxK1:foxK2:foxK3:gata123:gata456-3:gcm-2:gata456-1:gata456-2:gata456-4:hesl-2:atmin:zscan2-4:cbt:klf-3:klf-1:lhx1-3:musculin:sma…	66
69	dd_Smes_g4_1	11240150	11241003	854	*	k27ac_pooled_april21_peak_714	6.46028	Promoter	1	11241306	11274158	32853	1	MSTRG.444	SMEST025657002.1	-303	6.28096	0.211296	-0.763425	-0.49647	0	0	0	0.541264	-0.147927	FAM160A1	family with sequence similarity 160 member A1 [Source:HGNC Symbol;Acc:HGNC:34237]	MSTRG.7896:MSTRG.15425:MSTRG.19918	znf596:sp6-9:sp8	2	MSTRG.7896:MSTRG.7998:MSTRG.23420:MSTRG.12684:MSTRG.4288:MSTRG.4289:MSTRG.22163:MSTRG.16827:MSTRG.9571:MSTRG.624:MSTRG.11386:MSTRG.22087:MSTRG.10044:MSTRG.5025:MSTRG.20458:MSTRG.2221:MSTRG.14008:MSTRG.2484:MSTRG.1218:MSTRG.9193:MSTRG.11379:MSTRG.22994:MSTRG.4327:MSTRG.19528:MSTRG.2656:MSTRG.23472:MSTRG.18815:MSTRG.21195:SMESG000072873.1:MSTRG.19883:MSTRG.3843:MSTRG.5337:MSTRG.14880:MSTRG.5693:MST…	znf596:Lox5a:Lox5b:nkx5-3:hinfp-1:hinfp-2:rest-1:zfp674:znf-1:znf91:znf333-1:znf652:zscan2-2:zscan2-6:rest-2:dbx:dll-1:egr*-2:egr4-1:egr4-2:ets-5:fli-2:fli-3:ets-1:etv4:fli-1:foxQ/D:foxJ1-1:foxJ1-2:foxJ1-3:foxJ1-4:foxJ1-5:foxN2/3-1:foxN2/3-2:foxN2/3-3:gcm-2:gli-3:nkx6-2:Hox4b:nkx5-1:atmin:zscan2-4:cbt:klf-3:klf-1:lhx2-3:lmx1-1:lhx1-3:meis-1:meox:msx:myoD:neuroD-1:fer3l-3:nf-ya1:nf-ya2:nkx6-1:hr51…	73
70	dd_Smes_g4_1	11242531	11242736	206	*	k27ac_pooled_april21_peak_715	3.55399	Promoter	1	11242850	11274518	31669	1	MSTRG.444	MSTRG.444.9	-114	6.28096	0.211296	0.150901	-0.0115206	0	0	0	0.541264	-0.147927	FAM160A1	family with sequence similarity 160 member A1 [Source:HGNC Symbol;Acc:HGNC:34237]	MSTRG.1897:MSTRG.23026	meis-1:meis-2	2	MSTRG.7896:MSTRG.7998:MSTRG.23420:MSTRG.5414:MSTRG.12684:MSTRG.4288:MSTRG.4289:MSTRG.22163:MSTRG.16827:MSTRG.9571:MSTRG.624:MSTRG.11386:MSTRG.22087:MSTRG.10044:MSTRG.5025:MSTRG.20458:MSTRG.2221:MSTRG.19091:MSTRG.2484:MSTRG.1218:MSTRG.9193:MSTRG.20466:MSTRG.17923:MSTRG.7287:MSTRG.10592:MSTRG.10215:MSTRG.15979:MSTRG.18888:MSTRG.4069:MSTRG.17209:MSTRG.1469:MSTRG.12466:MSTRG.7427:MSTRG.20979:MSTRG.69…	znf596:Lox5a:Lox5b:tlx-1:nkx5-3:hinfp-1:hinfp-2:rest-1:zfp674:znf-1:znf91:znf333-1:znf652:zscan2-2:zscan2-6:rest-2:dbx:coe:egr*-2:egr4-1:egr4-2:gli-1:gli-2:nkx6-2:nkx5-1:cbt:klf-1:lbx:lhx2-1:lhx2-4:lhx2-3:lmx1-1:lhx1-3:lhx3:msx:sall4:fir1:zfp-8:zfp236-1:zfp354:znf101:znf425:znf660:lmpt-3:smad1:smad9:nkx6-1:nr2f1:nr4a-1:nr4a-2:hr51:neuroD-2:olig:pax2/5/8-1:phox:Xfin:zfp-4:zbed-1:zf-5:pou6-2:a:zfp-…	58
71	dd_Smes_g4_1	11245988	11246275	288	*	k27ac_pooled_april21_peak_718	5.47149	Promoter	1	11245629	11274158	28530	1	MSTRG.444	MSTRG.444.17	359	6.28096	0.211296	-0.256963	-0.303342	0	0	0	0.541264	-0.147927	FAM160A1	family with sequence similarity 160 member A1 [Source:HGNC Symbol;Acc:HGNC:34237]	MSTRG.3166:MSTRG.7853:MSTRG.4161:MSTRG.1496:MSTRG.16685:MSTRG.1504	onecut-1:onecut-2:onecut-3:onecut-5:hnf6:cux-2	1	MSTRG.7896:MSTRG.7998:MSTRG.23420:MSTRG.21923:MSTRG.9638:MSTRG.10410:MSTRG.1217:MSTRG.4483:MSTRG.17936:MSTRG.12684:MSTRG.4288:MSTRG.4289:MSTRG.22163:MSTRG.16827:MSTRG.9571:MSTRG.624:MSTRG.11386:MSTRG.22087:MSTRG.10044:MSTRG.5025:MSTRG.2221:MSTRG.2484:MSTRG.1218:MSTRG.9193:MSTRG.10604:MSTRG.2731:MSTRG.9479:MSTRG.13758:MSTRG.23309:MSTRG.9120:MSTRG.20466:MSTRG.17923:MSTRG.22990:MSTRG.7287:MSTRG.4403…	znf596:Lox5a:Lox5b:barhl2-1:barhl2-2:bsx:egr-5:znf362:zf-4:nkx5-3:hinfp-1:hinfp-2:rest-1:zfp674:znf-1:znf91:znf333-1:znf652:zscan2-2:zscan2-6:dbx:egr*-2:egr4-1:egr4-2:ets-3:elf1:foxA(P):foxN(P):gata123:gata456-3:gli-1:gli-2:gli-3:nkx6-2:hnf4:Hox4b:nerfin2-1:atmin:zscan2-4:cbt:klf-3:klf-1:egr-2:lbx:lhx1-3:lhx3:meox:musculin:msx:sall4:fir1:zfp-8:zfp236-1:zfp354:znf101:znf425:znf660:lmpt-3:smad1:sma…	79
72	dd_Smes_g4_1	11246448	11246776	329	*	k27ac_pooled_april21_peak_718	5.47149	Promoter	1	11245629	11274158	28530	1	MSTRG.444	MSTRG.444.17	819	6.28096	0.211296	-0.256963	-0.303342	0	0	0	0.541264	-0.147927	FAM160A1	family with sequence similarity 160 member A1 [Source:HGNC Symbol;Acc:HGNC:34237]	MSTRG.3166:MSTRG.7853:MSTRG.4161:MSTRG.1496:MSTRG.16685:MSTRG.1504	onecut-1:onecut-2:onecut-3:onecut-5:hnf6:cux-2	1	MSTRG.7896:MSTRG.9597:MSTRG.6974:MSTRG.7998:MSTRG.23420:MSTRG.21923:MSTRG.9638:MSTRG.10410:MSTRG.1217:MSTRG.4483:MSTRG.17936:MSTRG.12684:MSTRG.4288:MSTRG.4289:MSTRG.22163:MSTRG.16827:MSTRG.9571:MSTRG.624:MSTRG.11386:MSTRG.22087:MSTRG.10044:MSTRG.5025:MSTRG.2221:MSTRG.2484:MSTRG.1218:MSTRG.9193:MSTRG.10604:MSTRG.9479:MSTRG.22528:MSTRG.19546:MSTRG.7741:MSTRG.22295:MSTRG.19765:MSTRG.3929:MSTRG.6819:…	znf596:pax3/7-1:alx3-2:Lox5a:Lox5b:barhl2-1:barhl2-2:bsx:egr-5:znf362:zf-4:nkx5-3:hinfp-1:hinfp-2:rest-1:zfp674:znf-1:znf91:znf333-1:znf652:zscan2-2:zscan2-6:dbx:egr*-2:egr4-1:egr4-2:ets-3:foxA(P):foxD1:foxD2:foxD3:foxF1 :foxF2:foxG:foxL1:foxO:foxN(P):gata123:gata456-3:gcm-2:gli-1:gli-2:gli-3:prdm14:nkx6-2:hnf4:Hox4b:nerfin2-1:atmin:zscan2-4:cbt:klf-3:klf-1:egr-2:lbx:lhx1-3:lhx3:meox:musculin:msx…	89
73	dd_Smes_g4_1	11246448	11247408	961	*	k27ac_pooled_april21_peak_719	8.48777	Promoter	1	11245629	11274158	28530	1	MSTRG.444	MSTRG.444.17	819	6.28096	0.211296	-0.192111	-0.300827	0	0	0	0.541264	-0.147927	FAM160A1	family with sequence similarity 160 member A1 [Source:HGNC Symbol;Acc:HGNC:34237]	MSTRG.3166:MSTRG.7853:MSTRG.4161:MSTRG.1496:MSTRG.16685:MSTRG.1504	onecut-1:onecut-2:onecut-3:onecut-5:hnf6:cux-2	1	MSTRG.7896:MSTRG.9597:MSTRG.6974:MSTRG.7998:MSTRG.23420:MSTRG.21923:MSTRG.9638:MSTRG.10410:MSTRG.1217:MSTRG.4483:MSTRG.17936:MSTRG.12684:MSTRG.4288:MSTRG.4289:MSTRG.22163:MSTRG.16827:MSTRG.9571:MSTRG.624:MSTRG.11386:MSTRG.22087:MSTRG.10044:MSTRG.5025:MSTRG.2221:MSTRG.2484:MSTRG.1218:MSTRG.9193:MSTRG.10604:MSTRG.9479:MSTRG.22528:MSTRG.19546:MSTRG.7741:MSTRG.22295:MSTRG.19765:MSTRG.3929:MSTRG.6819:…	znf596:pax3/7-1:alx3-2:Lox5a:Lox5b:barhl2-1:barhl2-2:bsx:egr-5:znf362:zf-4:nkx5-3:hinfp-1:hinfp-2:rest-1:zfp674:znf-1:znf91:znf333-1:znf652:zscan2-2:zscan2-6:dbx:egr*-2:egr4-1:egr4-2:ets-3:foxA(P):foxD1:foxD2:foxD3:foxF1 :foxF2:foxG:foxL1:foxO:foxN(P):gata123:gata456-3:gcm-2:gli-1:gli-2:gli-3:prdm14:nkx6-2:hnf4:Hox4b:nerfin2-1:atmin:zscan2-4:cbt:klf-3:klf-1:egr-2:lbx:lhx1-3:lhx3:meox:musculin:msx…	89
74	dd_Smes_g4_1	11249943	11250824	882	*	k27ac_pooled_april21_peak_721	10.7343	Promoter	1	11250108	11269922	19815	1	MSTRG.444	MSTRG.444.18	0	6.28096	0.211296	-0.593998	-0.644779	0	0	0	0.541264	-0.147927	FAM160A1	family with sequence similarity 160 member A1 [Source:HGNC Symbol;Acc:HGNC:34237]	MSTRG.1217:MSTRG.4483:MSTRG.17936:MSTRG.10604:MSTRG.2656:MSTRG.2731:MSTRG.2111:MSTRG.12215:MSTRG.21546:MSTRG.5418	egr-5:znf362:zf-4:ets-3:etv4:elf1:pax2/5/8-1:pax6-1:pax6-2:rfx3	7	MSTRG.7998:MSTRG.23420:MSTRG.10410:SMESG000022963.1:MSTRG.20458:MSTRG.2221:MSTRG.14008:MSTRG.5081:MSTRG.10087:MSTRG.20250:MSTRG.18815:MSTRG.21195:SMESG000072873.1:MSTRG.19883:MSTRG.3843:MSTRG.5337:MSTRG.14880:MSTRG.5693:MSTRG.10837:MSTRG.23309:MSTRG.9120:MSTRG.12700:MSTRG.8018:MSTRG.11935:MSTRG.7287:MSTRG.19305:MSTRG.23578:MSTRG.20904:MSTRG.9913:MSTRG.4069:MSTRG.17209:MSTRG.20979:MSTRG.1897:MSTRG…	Lox5a:Lox5b:bsx:barhl1:rest-2:dbx:dll-1:emx1:pou-p1:foxP:foxQ/D:foxJ1-1:foxJ1-2:foxJ1-3:foxJ1-4:foxJ1-5:foxN2/3-1:foxN2/3-2:foxN2/3-3:gata123:gata456-3:gata456-1:gata456-2:gata456-4:nkx6-2:hesl-2:Hox1:Hox4a:Hox3a:lhx2-1:lhx2-4:lhx3:meis-1:meox:msx:smad1:smad9:nf-ya1:nf-ya2:nkx2l-1:a:phox:pou6-2:rfx4:rfx7:scratch-like:shox:six4:mitfl-2:uncx:vsx:egr-1:ovo-1:prdm13:gl:znf341:Lox4:irx-1:irx6-1:irx6-2…	44
75	dd_Smes_g4_1	11644913	11645146	234	*	k27ac_pooled_april21_peak_734	2.37436	Distal Intergenic	1	11633829	11643915	10087	1	MSTRG.457	MSTRG.457.4	11084	261.853	0.217549	-0.722755	-0.675731	0	0	0	0.710101	-0.0759794	-	-	-	-	0	MSTRG.7998:MSTRG.23420:MSTRG.10410:MSTRG.12684:MSTRG.19544:MSTRG.2221:MSTRG.2484:MSTRG.1218:MSTRG.9193:MSTRG.20466:MSTRG.17923:MSTRG.22990:MSTRG.23304:MSTRG.8862:MSTRG.5535:MSTRG.17691:MSTRG.16138:MSTRG.7287:MSTRG.19305:MSTRG.10592:MSTRG.9913:MSTRG.17155:SMESG000049967.1:MSTRG.10177:MSTRG.15979:MSTRG.18888:MSTRG.4069:MSTRG.17209:MSTRG.7427:MSTRG.20979:MSTRG.12930:MSTRG.12309:MSTRG.2947:MSTRG.6954…	Lox5a:Lox5b:bsx:nkx5-3:creb3l-1:dbx:egr*-2:egr4-1:egr4-2:gli-1:gli-2:gli-3:fezf2:gfi1:zfp541:zfhx3:prdm14:nkx6-2:hesl-2:nkx5-1:Hox3a:atmin:zscan2-4:klf-3:klf-1:lbx:lhx2-1:lhx2-4:lhx1-3:lhx3:Mef2-1:gtf2a1:Mef2-2:msx:nkx6-1:nr4a-1:nr4a-2:onecut-1:onecut-2:onecut-3:onecut-5:hnf6:cux-2:pax6-1:pax6-2:phox:pou4-1:pou4-2:a:gtf2b-4:ctcf:zfp-10:zfp677:rx:scratch-like:shox:sp5:klf-2:sp6-9:sp8:srebp:uncx:zn…	58
76	dd_Smes_g4_1	12506657	12506696	40	*	k27ac_pooled_april21_peak_751	6.19022	Promoter	1	12494706	12506892	12187	2	MSTRG.483	SMEST025835001.1	196	2.25368	0.15272	-0.248301	0.142649	1	1	0	0.0219109	0.979971	SVOP	SV2 related protein [Source:HGNC Symbol;Acc:HGNC:25417]	MSTRG.4403	hnf4	1	MSTRG.10887:MSTRG.7896:MSTRG.7998:MSTRG.23420:MSTRG.21923:MSTRG.9638:MSTRG.1217:MSTRG.4483:MSTRG.17936:MSTRG.5414:MSTRG.2221:MSTRG.10604:MSTRG.11379:MSTRG.22994:MSTRG.4327:MSTRG.19528:MSTRG.2656:MSTRG.2731:MSTRG.23472:MSTRG.5625:MSTRG.2171:MSTRG.22528:MSTRG.19546:MSTRG.7741:MSTRG.3929:MSTRG.6819:MSTRG.11814:MSTRG.10087:MSTRG.20250:MSTRG.13758:MSTRG.18815:MSTRG.21195:SMESG000072873.1:MSTRG.19883:M…	arnt-1:znf596:Lox5a:Lox5b:barhl2-1:barhl2-2:egr-5:znf362:zf-4:tlx-1:dbx:ets-3:ets-5:fli-2:fli-3:ets-1:etv4:elf1:fli-1:foxC1:foxC2:foxD1:foxD2:foxD3:foxG:foxL1:foxO:pou-p1:foxP:foxN(P):foxQ/D:foxJ1-1:foxJ1-2:foxJ1-3:foxJ1-4:foxJ1-5:foxN2/3-1:foxN2/3-2:foxN2/3-3:foxK1:foxK2:foxK3:gli-1:gli-2:prdm14:hesl-3:nkx6-2:hesl-2:nkx3-1:nkx5-2:isl-1:isl-2:atmin:zscan2-4:cbt:klf-3:klf-1:lbx:lhx2-3:lhx1-3:lhx3:…	71
77	dd_Smes_g4_1	12506657	12507365	709	*	k27ac_pooled_april21_peak_752	4.93787	Promoter	1	12494706	12506892	12187	2	MSTRG.483	SMEST025835001.1	0	2.25368	0.15272	-0.243988	0.0878141	1	1	0	0.0219109	0.979971	SVOP	SV2 related protein [Source:HGNC Symbol;Acc:HGNC:25417]	MSTRG.4403	hnf4	1	MSTRG.10887:MSTRG.7896:MSTRG.7998:MSTRG.23420:MSTRG.21923:MSTRG.9638:MSTRG.1217:MSTRG.4483:MSTRG.17936:MSTRG.5414:MSTRG.2221:MSTRG.10604:MSTRG.11379:MSTRG.22994:MSTRG.4327:MSTRG.19528:MSTRG.2656:MSTRG.2731:MSTRG.23472:MSTRG.5625:MSTRG.2171:MSTRG.22528:MSTRG.19546:MSTRG.7741:MSTRG.3929:MSTRG.6819:MSTRG.11814:MSTRG.10087:MSTRG.20250:MSTRG.13758:MSTRG.18815:MSTRG.21195:SMESG000072873.1:MSTRG.19883:M…	arnt-1:znf596:Lox5a:Lox5b:barhl2-1:barhl2-2:egr-5:znf362:zf-4:tlx-1:dbx:ets-3:ets-5:fli-2:fli-3:ets-1:etv4:elf1:fli-1:foxC1:foxC2:foxD1:foxD2:foxD3:foxG:foxL1:foxO:pou-p1:foxP:foxN(P):foxQ/D:foxJ1-1:foxJ1-2:foxJ1-3:foxJ1-4:foxJ1-5:foxN2/3-1:foxN2/3-2:foxN2/3-3:foxK1:foxK2:foxK3:gli-1:gli-2:prdm14:hesl-3:nkx6-2:hesl-2:nkx3-1:nkx5-2:isl-1:isl-2:atmin:zscan2-4:cbt:klf-3:klf-1:lbx:lhx2-3:lhx1-3:lhx3:…	71
78	dd_Smes_g4_1	12693176	12693736	561	*	k27ac_pooled_april21_peak_754	3.6245	Promoter	1	12693410	12713877	20468	1	MSTRG.491	SMEST025866001.1	0	6.46305	0.282912	0.201852	-0.069572	0	0	0	0.687654	-0.100639	OPLAH	5-oxoprolinase, ATP-hydrolysing [Source:HGNC Symbol;Acc:HGNC:8149]	-	-	0	MSTRG.9597:MSTRG.7998:MSTRG.23420:MSTRG.23513:MSTRG.10410:SMESG000022963.1:MSTRG.12684:MSTRG.4288:MSTRG.4289:MSTRG.22163:MSTRG.16827:MSTRG.9571:MSTRG.624:MSTRG.11386:MSTRG.22087:MSTRG.10044:MSTRG.5025:MSTRG.20458:MSTRG.2221:MSTRG.2484:MSTRG.1218:MSTRG.9193:MSTRG.11379:MSTRG.22994:MSTRG.4327:MSTRG.19528:MSTRG.2656:MSTRG.2731:MSTRG.23472:MSTRG.11405:MSTRG.20466:MSTRG.17923:MSTRG.22990:MSTRG.12700:M…	pax3/7-1:Lox5a:Lox5b:e22/23:bsx:barhl1:nkx5-3:hinfp-1:hinfp-2:rest-1:zfp674:znf-1:znf91:znf333-1:znf652:zscan2-2:zscan2-6:rest-2:dbx:egr*-2:egr4-1:egr4-2:ets-5:fli-2:fli-3:ets-1:etv4:elf1:fli-1:gcm-2:gli-1:gli-2:gli-3:gata456-1:gata456-2:gata456-4:nkx6-2:nkx3-1:nkx5-2:nerfin2-1:isl-1:isl-2:atmin:zscan2-4:klf-3:lhx2-3:lhx1-3:meis-1:musculin:msx:sall4:fir1:zfp-8:zfp236-1:zfp354:znf101:znf425:znf660…	74
79	dd_Smes_g4_1	12693717	12693736	20	*	k27ac_pooled_april21_peak_755	5.85043	Promoter	1	12693410	12713877	20468	1	MSTRG.491	SMEST025866001.1	307	6.46305	0.282912	0.0919	-0.114195	0	0	0	0.687654	-0.100639	OPLAH	5-oxoprolinase, ATP-hydrolysing [Source:HGNC Symbol;Acc:HGNC:8149]	-	-	0	MSTRG.9597:MSTRG.7998:MSTRG.23420:MSTRG.23513:MSTRG.10410:SMESG000022963.1:MSTRG.12684:MSTRG.4288:MSTRG.4289:MSTRG.22163:MSTRG.16827:MSTRG.9571:MSTRG.624:MSTRG.11386:MSTRG.22087:MSTRG.10044:MSTRG.5025:MSTRG.20458:MSTRG.2221:MSTRG.11379:MSTRG.22994:MSTRG.4327:MSTRG.19528:MSTRG.2731:MSTRG.23472:MSTRG.20466:MSTRG.17923:MSTRG.22990:MSTRG.7287:MSTRG.7792:MSTRG.6856:MSTRG.12851:MSTRG.17848:MSTRG.9911:M…	pax3/7-1:Lox5a:Lox5b:e22/23:bsx:barhl1:nkx5-3:hinfp-1:hinfp-2:rest-1:zfp674:znf-1:znf91:znf333-1:znf652:zscan2-2:zscan2-6:rest-2:dbx:ets-5:fli-2:fli-3:ets-1:elf1:fli-1:gli-1:gli-2:gli-3:nkx6-2:nkx3-1:nkx5-2:nerfin2-1:isl-1:isl-2:atmin:zscan2-4:klf-3:lhx1-3:meis-1:musculin:msx:sall4:fir1:zfp-8:zfp236-1:zfp354:znf101:znf425:znf660:lmpt-3:smad1:smad9:mitfl-3:myoD:neuroD-1:fer3l-3:nkx2l-1:a:nkx3-2:nk…	66
80	dd_Smes_g4_1	12735534	12735899	366	*	k27ac_pooled_april21_peak_763	3.92052	Intron (MSTRG.495.1/MSTRG.495, intron 1 of 3)	1	12734020	12747790	13771	1	MSTRG.495	SMEST025870001.1	1514	0.788649	0.0887525	-0.152806	-0.318431	0	0	0	0.161193	0.706148	SLC2A4RG	SLC2A4 regulator [Source:HGNC Symbol;Acc:HGNC:15930]	-	-	0	MSTRG.9597:MSTRG.6974:MSTRG.7998:MSTRG.23420:SMESG000022963.1:MSTRG.19544:MSTRG.2221:MSTRG.14008:MSTRG.2484:MSTRG.1218:MSTRG.9193:MSTRG.5081:MSTRG.11379:MSTRG.22994:MSTRG.4327:MSTRG.19528:MSTRG.2656:MSTRG.23472:MSTRG.18815:MSTRG.21195:SMESG000072873.1:MSTRG.19883:MSTRG.3843:MSTRG.5337:MSTRG.14880:MSTRG.5693:MSTRG.10837:MSTRG.11405:MSTRG.20466:MSTRG.17923:MSTRG.22990:MSTRG.3741:MSTRG.7287:MSTRG.10…	pax3/7-1:alx3-2:Lox5a:Lox5b:barhl1:creb3l-1:dbx:dll-1:egr*-2:egr4-1:egr4-2:emx1:ets-5:fli-2:fli-3:ets-1:etv4:fli-1:foxQ/D:foxJ1-1:foxJ1-2:foxJ1-3:foxJ1-4:foxJ1-5:foxN2/3-1:foxN2/3-2:foxN2/3-3:gcm-2:gli-1:gli-2:gli-3:hesl-3:nkx6-2:cbt:klf-3:klf-1:lhx2-1:lhx2-4:lmx1-2:lhx1-1:lhx1-4:lhx1-3:lhx3:Mef2-2:sall4:fir1:zfp-8:zfp236-1:zfp354:znf101:znf425:znf660:lmpt-3:nf-ya1:nf-ya2:nkx2l-1:nkx3-2:onecut-1:…	62
81	dd_Smes_g4_1	12803886	12804175	290	*	k27ac_pooled_april21_peak_768	2.55561	Promoter	1	12802693	12804282	1590	2	MSTRG.497	SMEST025873001.1	107	10.7379	0.206753	-0.224529	-0.217855	0	0	0	0.199405	-0.349099	FKRP	fukutin related protein [Source:HGNC Symbol;Acc:HGNC:17997]	MSTRG.23304:MSTRG.8862:MSTRG.5535:MSTRG.17691:MSTRG.16138:MSTRG.7792:MSTRG.6856:MSTRG.12623:MSTRG.17183:MSTRG.8827:MSTRG.4514:MSTRG.3909:MSTRG.3339	fezf2:gfi1:zfp541:zfhx3:prdm14:nkx3-1:nkx5-2:yy2:zbed8:egr4-3:ikzf1:zfp362:onecut-4	7	MSTRG.7896:MSTRG.7998:MSTRG.23420:MSTRG.21923:MSTRG.9638:MSTRG.1217:MSTRG.4483:MSTRG.17936:MSTRG.12684:MSTRG.14008:MSTRG.9479:MSTRG.22990:MSTRG.3741:MSTRG.7287:MSTRG.10592:MSTRG.23578:MSTRG.20904:MSTRG.1469:MSTRG.12466:MSTRG.7427:MSTRG.20979:MSTRG.6954:MSTRG.4208:MSTRG.16892:MSTRG.11214:MSTRG.14130:MSTRG.3824:MSTRG.3166:MSTRG.7853:MSTRG.4161:MSTRG.1496:MSTRG.16685:MSTRG.1504:MSTRG.3565:MSTRG.7049…	znf596:Lox5a:Lox5b:barhl2-1:barhl2-2:egr-5:znf362:zf-4:nkx5-3:dll-1:foxA(P):gli-3:hesl-3:nkx6-2:nkx5-1:Hox1:Hox4a:lhx2-3:lmx1-1:lhx1-3:lhx3:msx:smad1:smad9:myoD:nf-ya1:nf-ya2:onecut-1:onecut-2:onecut-3:onecut-5:hnf6:cux-2:Xfin:zfp-4:zbed-1:zf-5:zfp-7:shox:tal:ptf-4:uncx:znf207:Lox4:alx4:prdm1-1:zfp-3:zfp878:zbed1:zscan2-7:irx-1:irx6-1:irx6-2:irx6-3:foxA1:foxA2:arx:osr-1:osr-2:otp:ovo-2:ovo-3:tead…	39
82	dd_Smes_g4_1	12869344	12869551	208	*	k27ac_pooled_april21_peak_775	2.19864	Intron (MSTRG.502.1/MSTRG.502, intron 1 of 1)	1	12871700	12872001	302	2	MSTRG.504	MSTRG.504.1	2450	0.203838	1	-0.48731	-0.341531	0	0	0			-	-	MSTRG.9925	six4	1	MSTRG.7896:SMESG000022963.1:MSTRG.4288:MSTRG.4289:MSTRG.22163:MSTRG.16827:MSTRG.9571:MSTRG.624:MSTRG.11386:MSTRG.22087:MSTRG.10044:MSTRG.5025:MSTRG.2221:MSTRG.10604:MSTRG.11379:MSTRG.22994:MSTRG.4327:MSTRG.19528:MSTRG.2656:MSTRG.2731:MSTRG.23472:MSTRG.18451:MSTRG.12975:MSTRG.17474:MSTRG.13843:MSTRG.7792:MSTRG.6856:MSTRG.17848:MSTRG.9911:MSTRG.2271:MSTRG.1469:MSTRG.7427:MSTRG.372:MSTRG.6954:MSTRG.…	znf596:barhl1:hinfp-1:hinfp-2:rest-1:zfp674:znf-1:znf91:znf333-1:znf652:zscan2-2:zscan2-6:dbx:ets-3:ets-5:fli-2:fli-3:ets-1:etv4:elf1:fli-1:foxK1:foxK2:foxK3:Hox4b:nkx3-1:nkx5-2:isl-1:isl-2:egr-2:lhx2-3:lhx1-3:mlx:msx:sall4:fir1:zfp-8:zfp236-1:zfp354:znf101:znf425:znf660:lmpt-3:smad1:smad9:nkx2l-1:a:nr-1:nr2e1:tlx-2:onecut-1:onecut-2:onecut-3:onecut-5:hnf6:cux-2:pax2/5/8-1:pax6-1:pax6-2:Pbx-4:Pre…	48
83	dd_Smes_g4_1	12871751	12871991	241	*	k27ac_pooled_april21_peak_776	5.58179	Promoter	1	12871700	12872001	302	2	MSTRG.504	MSTRG.504.1	10	0.203838	1	-0.333425	-0.44079	0	0	0			-	-	-	-	0	MSTRG.10887:MSTRG.7998:MSTRG.23420:MSTRG.1217:MSTRG.4483:MSTRG.17936:MSTRG.12684:MSTRG.19544:MSTRG.4288:MSTRG.4289:MSTRG.22163:MSTRG.16827:MSTRG.9571:MSTRG.624:MSTRG.11386:MSTRG.22087:MSTRG.10044:MSTRG.5025:MSTRG.20458:MSTRG.2221:MSTRG.2484:MSTRG.1218:MSTRG.9193:MSTRG.22295:MSTRG.19765:MSTRG.10087:MSTRG.20250:MSTRG.11405:MSTRG.20466:MSTRG.17923:MSTRG.22990:MSTRG.23304:MSTRG.8862:MSTRG.5535:MSTRG.…	arnt-1:Lox5a:Lox5b:egr-5:znf362:zf-4:nkx5-3:creb3l-1:hinfp-1:hinfp-2:rest-1:zfp674:znf-1:znf91:znf333-1:znf652:zscan2-2:zscan2-6:rest-2:dbx:egr*-2:egr4-1:egr4-2:foxF1 :foxF2:pou-p1:foxP:gcm-2:gli-1:gli-2:gli-3:fezf2:gfi1:zfp541:zfhx3:prdm14:nkx6-2:nkx3-1:nkx5-2:nkx5-1:nerfin2-1:atmin:zscan2-4:cbt:klf-3:klf-1:egr-2:lhx1-3:musculin:smad1:smad9:myoD:nf-ya1:nf-ya2:nkx3-2:nr2f1:Xfin:zfp-4:zbed-1:zf-5:…	65
84	dd_Smes_g4_1	12886814	12887141	328	*	k27ac_pooled_april21_peak_781	4.54389	Intron (MSTRG.505.1/MSTRG.505, intron 1 of 1)	1	12884203	12889074	4872	2	MSTRG.506	SMEST025882001.1	1933	16.7463	0.268032	-0.264741	-0.0668586	1	1	1	3.68586e-06	-0.896992	LHFPL2	LHFPL tetraspan subfamily member 2 [Source:HGNC Symbol;Acc:HGNC:6588]	-	-	0	MSTRG.7896:MSTRG.7998:MSTRG.23420:MSTRG.1217:MSTRG.4483:MSTRG.17936:MSTRG.12684:MSTRG.4288:MSTRG.4289:MSTRG.22163:MSTRG.16827:MSTRG.9571:MSTRG.624:MSTRG.11386:MSTRG.22087:MSTRG.10044:MSTRG.5025:MSTRG.20458:MSTRG.22126:SMESG000049970.1:SMESG000031904.1:MSTRG.221:MSTRG.2221:MSTRG.2484:MSTRG.1218:MSTRG.9193:MSTRG.11379:MSTRG.22994:MSTRG.4327:MSTRG.2656:MSTRG.2731:MSTRG.23472:MSTRG.22295:MSTRG.19765:…	znf596:Lox5a:Lox5b:egr-5:znf362:zf-4:nkx5-3:hinfp-1:hinfp-2:rest-1:zfp674:znf-1:znf91:znf333-1:znf652:zscan2-2:zscan2-6:rest-2:zfp560-1:zscan2-5:zscan2-8:zf-6:dbx:egr*-2:egr4-1:egr4-2:ets-5:fli-2:fli-3:etv4:elf1:fli-1:foxF1 :foxF2:pou-p1:foxP:gcm-2:fezf2:gfi1:zfp541:zfhx3:prdm14:nkx6-2:Hox3a:nerfin2-1:isl-1:isl-2:cbt:egr-2:lhx1-3:lhx3:meis-1:sall4:fir1:zfp-8:zfp236-1:zfp354:znf101:znf425:znf660:l…	66
85	dd_Smes_g4_1	13246353	13246491	139	*	k27ac_pooled_april21_peak_795	5.99445	Intron (SMEST025925001.1/MSTRG.521, intron 1 of 7)	1	13235629	13259276	23648	2	MSTRG.521	MSTRG.521.7	12785	21.4361	0.338503	-0.156401	-0.126674	0	0	0	0.368355	-0.187902	AXIN1	axin 1 [Source:HGNC Symbol;Acc:HGNC:903]	-	-	0	MSTRG.7896:MSTRG.5414:MSTRG.12684:MSTRG.19544:MSTRG.4288:MSTRG.4289:MSTRG.22163:MSTRG.16827:MSTRG.9571:MSTRG.624:MSTRG.11386:MSTRG.22087:MSTRG.10044:MSTRG.5025:MSTRG.20458:MSTRG.2221:MSTRG.19091:MSTRG.2484:MSTRG.1218:MSTRG.9193:MSTRG.5625:MSTRG.2171:MSTRG.11405:MSTRG.22990:MSTRG.13843:MSTRG.7792:MSTRG.6856:MSTRG.12851:MSTRG.17155:SMESG000049967.1:MSTRG.10215:MSTRG.15979:MSTRG.2271:MSTRG.18888:MST…	znf596:tlx-1:nkx5-3:creb3l-1:hinfp-1:hinfp-2:rest-1:zfp674:znf-1:znf91:znf333-1:znf652:zscan2-2:zscan2-6:rest-2:dbx:coe:egr*-2:egr4-1:egr4-2:foxC1:foxC2:gcm-2:gli-3:Hox4b:nkx3-1:nkx5-2:nerfin2-1:atmin:zscan2-4:cbt:klf-1:egr-2:lbx:lmx1-1:lhx1-3:lhx3:mlx:musculin:sall4:fir1:zfp-8:zfp236-1:zfp354:znf101:znf425:znf660:lmpt-3:mitfl-3:myoD:nr4a-1:nr4a-2:nr-1:nr2e1:tlx-2:hr51:onecut-1:onecut-2:onecut-3:…	74
86	dd_Smes_g4_1	13246353	13246716	364	*	k27ac_pooled_april21_peak_796	6.56115	Intron (SMEST025925001.1/MSTRG.521, intron 1 of 7)	1	13235629	13259276	23648	2	MSTRG.521	MSTRG.521.7	12560	21.4361	0.338503	-0.172931	-0.318461	0	0	0	0.368355	-0.187902	AXIN1	axin 1 [Source:HGNC Symbol;Acc:HGNC:903]	-	-	0	MSTRG.7896:MSTRG.5414:MSTRG.12684:MSTRG.19544:MSTRG.4288:MSTRG.4289:MSTRG.22163:MSTRG.16827:MSTRG.9571:MSTRG.624:MSTRG.11386:MSTRG.22087:MSTRG.10044:MSTRG.5025:MSTRG.20458:MSTRG.2221:MSTRG.19091:MSTRG.2484:MSTRG.1218:MSTRG.9193:MSTRG.5625:MSTRG.2171:MSTRG.11405:MSTRG.22990:MSTRG.13843:MSTRG.7792:MSTRG.6856:MSTRG.12851:MSTRG.17155:SMESG000049967.1:MSTRG.10215:MSTRG.15979:MSTRG.2271:MSTRG.18888:MST…	znf596:tlx-1:nkx5-3:creb3l-1:hinfp-1:hinfp-2:rest-1:zfp674:znf-1:znf91:znf333-1:znf652:zscan2-2:zscan2-6:rest-2:dbx:coe:egr*-2:egr4-1:egr4-2:foxC1:foxC2:gcm-2:gli-3:Hox4b:nkx3-1:nkx5-2:nerfin2-1:atmin:zscan2-4:cbt:klf-1:egr-2:lbx:lmx1-1:lhx1-3:lhx3:mlx:musculin:sall4:fir1:zfp-8:zfp236-1:zfp354:znf101:znf425:znf660:lmpt-3:mitfl-3:myoD:nr4a-1:nr4a-2:nr-1:nr2e1:tlx-2:hr51:onecut-1:onecut-2:onecut-3:…	74
87	dd_Smes_g4_1	13248793	13248996	204	*	k27ac_pooled_april21_peak_797	4.69063	Intron (SMEST025925001.1/MSTRG.521, intron 1 of 7)	1	13235629	13259276	23648	2	MSTRG.521	MSTRG.521.7	10280	21.4361	0.338503	-0.269886	0.284617	0	0	0	0.368355	-0.187902	AXIN1	axin 1 [Source:HGNC Symbol;Acc:HGNC:903]	-	-	0	MSTRG.7896:MSTRG.7998:MSTRG.23420:MSTRG.1217:MSTRG.4483:MSTRG.17936:MSTRG.12684:MSTRG.22126:SMESG000049970.1:SMESG000031904.1:MSTRG.221:MSTRG.2221:MSTRG.2484:MSTRG.1218:MSTRG.9193:MSTRG.10604:MSTRG.11379:MSTRG.22994:MSTRG.4327:MSTRG.19528:MSTRG.2656:MSTRG.23472:MSTRG.10087:MSTRG.20250:MSTRG.22990:MSTRG.7287:MSTRG.4403:MSTRG.13843:MSTRG.7792:MSTRG.6856:MSTRG.23578:MSTRG.20904:MSTRG.9913:MSTRG.1285…	znf596:Lox5a:Lox5b:egr-5:znf362:zf-4:nkx5-3:zfp560-1:zscan2-5:zscan2-8:zf-6:dbx:egr*-2:egr4-1:egr4-2:ets-3:ets-5:fli-2:fli-3:ets-1:etv4:fli-1:pou-p1:foxP:gli-3:nkx6-2:hnf4:Hox4b:nkx3-1:nkx5-2:Hox1:Hox4a:Hox3a:nerfin2-1:atmin:zscan2-4:cbt:klf-3:klf-1:egr-2:lbx:lmx1-1:lhx1-3:lhx3:meis-1:meox:musculin:mitfl-3:neuroD-1:fer3l-3:a:nkx6-1:nr2f1:nr4a-1:nr4a-2:nr-1:nr2e1:tlx-2:neuroD-2:olig:onecut-1:onecu…	81
88	dd_Smes_g4_1	13259203	13259731	529	*	k27ac_pooled_april21_peak_798	6.01659	Promoter	1	13235629	13259276	23648	2	MSTRG.521	MSTRG.521.7	0	21.4361	0.338503	-0.24549	-0.275574	0	0	0	0.368355	-0.187902	AXIN1	axin 1 [Source:HGNC Symbol;Acc:HGNC:903]	-	-	0	MSTRG.10887:MSTRG.7896:MSTRG.7998:MSTRG.23420:MSTRG.21923:MSTRG.9638:SMESG000022963.1:MSTRG.12684:MSTRG.19544:MSTRG.4288:MSTRG.4289:MSTRG.22163:MSTRG.16827:MSTRG.9571:MSTRG.624:MSTRG.11386:MSTRG.22087:MSTRG.10044:MSTRG.5025:MSTRG.2221:MSTRG.2484:MSTRG.1218:MSTRG.9193:MSTRG.11405:MSTRG.20466:MSTRG.17923:MSTRG.12700:MSTRG.8018:MSTRG.11935:MSTRG.7287:MSTRG.19305:MSTRG.18888:MSTRG.4069:MSTRG.17209:MS…	arnt-1:znf596:Lox5a:Lox5b:barhl2-1:barhl2-2:barhl1:nkx5-3:creb3l-1:hinfp-1:hinfp-2:rest-1:zfp674:znf-1:znf91:znf333-1:znf652:zscan2-2:zscan2-6:dbx:egr*-2:egr4-1:egr4-2:gcm-2:gli-1:gli-2:gata456-1:gata456-2:gata456-4:nkx6-2:hesl-2:lbx:lhx2-1:lhx2-4:lhx1-3:lhx3:meis-1:meox:sall4:fir1:zfp-8:zfp236-1:zfp354:znf101:znf425:znf660:lmpt-3:smad1:smad9:nr4a-1:nr4a-2:pax2/5/8-1:pax6-1:pax6-2:Pbx-4:Prep:Xfin…	66
89	dd_Smes_g4_1	13260127	13260831	705	*	k27ac_pooled_april21_peak_799	3.09046	Promoter	1	13235629	13259276	23648	2	MSTRG.521	MSTRG.521.7	-851	21.4361	0.338503	-0.0515054	-0.270109	0	0	0	0.368355	-0.187902	AXIN1	axin 1 [Source:HGNC Symbol;Acc:HGNC:903]	-	-	0	MSTRG.10887:MSTRG.7896:MSTRG.21923:MSTRG.9638:SMESG000022963.1:MSTRG.12684:MSTRG.4288:MSTRG.4289:MSTRG.22163:MSTRG.16827:MSTRG.9571:MSTRG.624:MSTRG.11386:MSTRG.22087:MSTRG.10044:MSTRG.5025:MSTRG.2221:MSTRG.2484:MSTRG.1218:MSTRG.9193:MSTRG.23472:MSTRG.11405:MSTRG.20466:MSTRG.17923:MSTRG.12700:MSTRG.8018:MSTRG.11935:MSTRG.13843:MSTRG.19305:MSTRG.7792:MSTRG.6856:MSTRG.10592:MSTRG.17155:SMESG00004996…	arnt-1:znf596:barhl2-1:barhl2-2:barhl1:nkx5-3:hinfp-1:hinfp-2:rest-1:zfp674:znf-1:znf91:znf333-1:znf652:zscan2-2:zscan2-6:dbx:egr*-2:egr4-1:egr4-2:fli-1:gcm-2:gli-1:gli-2:gata456-1:gata456-2:gata456-4:Hox4b:hesl-2:nkx3-1:nkx5-2:nkx5-1:atmin:zscan2-4:klf-1:lbx:lmx1-1:lhx1-3:lhx3:meis-1:smad1:smad9:mitfl-3:myoD:onecut-1:onecut-2:onecut-3:onecut-5:hnf6:cux-2:pax2/5/8-1:pax6-1:pax6-2:Pbx-4:Prep:pou4-…	70
90	dd_Smes_g4_1	13783395	13784296	902	*	k27ac_pooled_april21_peak_811	6.69163	Intron (SMEST026000001.1/MSTRG.545, intron 8 of 17)	1	13770644	13793579	22936	1	MSTRG.545	MSTRG.545.9	12751	24.966	0.315052	-0.326086	-0.69126	1	1	1	6.6203e-24	-0.968078	ACTN1	actinin alpha 1 [Source:HGNC Symbol;Acc:HGNC:163]	MSTRG.22126:SMESG000049970.1:SMESG000031904.1:MSTRG.221:MSTRG.2484:MSTRG.1218:MSTRG.9193:MSTRG.20466:MSTRG.17923:MSTRG.13843:MSTRG.4208:MSTRG.16892:MSTRG.6003:a:MSTRG.18649:MSTRG.4755:MSTRG.9898:MSTRG.7450:MSTRG.5557:MSTRG.572:MSTRG.18286:MSTRG.3339:MSTRG.657	zfp560-1:zscan2-5:zscan2-8:zf-6:egr*-2:egr4-1:egr4-2:gli-1:gli-2:Hox4b:smad1:smad9:nkx2l-1:a:Pbx-4:Prep:smad4-1:irx-1:irx6-1:irx6-2:irx6-3:onecut-4:twist	13	MSTRG.10887:MSTRG.7896:SMESG000022963.1:MSTRG.1217:MSTRG.4483:MSTRG.17936:MSTRG.12684:MSTRG.2221:MSTRG.18815:MSTRG.21195:SMESG000072873.1:MSTRG.19883:MSTRG.3843:MSTRG.5337:MSTRG.14880:MSTRG.5693:MSTRG.10837:MSTRG.18451:MSTRG.12975:MSTRG.17474:MSTRG.11405:MSTRG.3741:MSTRG.19305:MSTRG.17848:MSTRG.9911:MSTRG.17155:SMESG000049967.1:MSTRG.10215:MSTRG.1469:MSTRG.12466:MSTRG.7427:MSTRG.12930:MSTRG.12309…	arnt-1:znf596:barhl1:egr-5:znf362:zf-4:nkx5-3:dbx:foxQ/D:foxJ1-1:foxJ1-2:foxJ1-3:foxJ1-4:foxJ1-5:foxN2/3-1:foxN2/3-2:foxN2/3-3:foxK1:foxK2:foxK3:gcm-2:hesl-3:hesl-2:isl-1:isl-2:atmin:zscan2-4:cbt:lhx2-3:lmx1-1:lhx1-3:Mef2-1:gtf2a1:mlx:msx:myoD:pdp1:nf-ya1:nf-ya2:nkx3-2:nr2f1:onecut-1:onecut-2:onecut-3:onecut-5:hnf6:cux-2:pax2/5/8-1:pax6-1:pax6-2:pou1:pou4-1:pou4-2:znf181:zbtb24:ski-1:shox:snail-1…	53
91	dd_Smes_g4_1	14083113	14083275	163	*	k27ac_pooled_april21_peak_830	6.13948	Distal Intergenic	1	14083647	14105491	21845	2	MSTRG.551	MSTRG.551.1	22216	6.33099	0.282908	-0.632048	-1.04769	1	1	1	1.80369e-06	-1.00509	ZMIZ2	zinc finger MIZ-type containing 2 [Source:HGNC Symbol;Acc:HGNC:22229]	a:MSTRG.10612	a:rx	2	MSTRG.7998:MSTRG.23420:MSTRG.5414:MSTRG.12684:MSTRG.19544:MSTRG.20458:MSTRG.2221:MSTRG.14008:MSTRG.10604:MSTRG.5081:MSTRG.23472:MSTRG.22528:MSTRG.19546:MSTRG.7741:MSTRG.6819:MSTRG.11814:MSTRG.13758:MSTRG.20466:MSTRG.17923:MSTRG.23304:MSTRG.8862:MSTRG.5535:MSTRG.17691:MSTRG.16138:MSTRG.7287:MSTRG.4403:MSTRG.10592:MSTRG.23578:MSTRG.20904:MSTRG.10215:MSTRG.10177:MSTRG.15979:MSTRG.2271:MSTRG.4069:MST…	Lox5a:Lox5b:tlx-1:nkx5-3:creb3l-1:rest-2:dbx:dll-1:ets-3:emx1:fli-1:foxD1:foxD2:foxD3:foxL1:foxO:foxN(P):gli-1:gli-2:fezf2:gfi1:zfp541:zfhx3:prdm14:nkx6-2:hnf4:nkx5-1:Hox1:Hox4a:cbt:klf-3:klf-1:egr-2:lhx2-1:lhx2-4:lhx3:Mef2-1:gtf2a1:meis-1:meox:musculin:smad1:smad9:nf-ya1:nf-ya2:nkx3-2:onecut-1:onecut-2:onecut-3:onecut-5:hnf6:cux-2:pax2/5/8-1:pou6-2:znf181:zbtb24:ski-1:zfp-7:rfx7:ctcf:zfp-10:zfp6…	70
92	dd_Smes_g4_1	14088948	14089029	82	*	k27ac_pooled_april21_peak_832	4.69771	Intron (MSTRG.551.1/MSTRG.551, intron 5 of 7)	1	14083647	14105491	21845	2	MSTRG.551	MSTRG.551.1	16462	6.33099	0.282908	-0.375505	-0.70033	1	1	1	1.80369e-06	-1.00509	ZMIZ2	zinc finger MIZ-type containing 2 [Source:HGNC Symbol;Acc:HGNC:22229]	MSTRG.11214:MSTRG.10086:MSTRG.18571:MSTRG.8960	myoD:da:ap4-1:rxra	4	MSTRG.7896:MSTRG.9597:MSTRG.10410:SMESG000022963.1:MSTRG.5414:MSTRG.12684:MSTRG.19544:MSTRG.4288:MSTRG.4289:MSTRG.22163:MSTRG.16827:MSTRG.9571:MSTRG.624:MSTRG.11386:MSTRG.22087:MSTRG.10044:MSTRG.5025:MSTRG.20458:MSTRG.22126:SMESG000049970.1:SMESG000031904.1:MSTRG.221:MSTRG.2221:MSTRG.14008:MSTRG.19091:MSTRG.2484:MSTRG.1218:MSTRG.9193:MSTRG.10604:MSTRG.5081:MSTRG.11379:MSTRG.22994:MSTRG.4327:MSTRG…	znf596:pax3/7-1:bsx:barhl1:tlx-1:nkx5-3:creb3l-1:hinfp-1:hinfp-2:rest-1:zfp674:znf-1:znf91:znf333-1:znf652:zscan2-2:zscan2-6:rest-2:zfp560-1:zscan2-5:zscan2-8:zf-6:dbx:dll-1:coe:egr*-2:egr4-1:egr4-2:ets-3:emx1:ets-5:fli-2:fli-3:ets-1:etv4:elf1:fli-1:foxC1:foxC2:gli-3:hesl-3:hnf4:Hox4b:atmin:zscan2-4:lhx2-1:lhx2-4:lhx2-3:lmx1-1:lhx1-1:lhx1-4:lhx1-3:meis-1:musculin:msx:smad1:smad9:neuroD-1:fer3l-3:…	79
93	dd_Smes_g4_1	14170754	14170916	163	*	k27ac_pooled_april21_peak_841	3.77214	Distal Intergenic	1	14194769	14195321	553	2	SMESG000026029.1	SMEST026029001.1	24405	0.252304	1	-0.860832	-0.112176	0	0	0			SART3	spliceosome associated factor 3, U4/U6 recycling protein [Source:HGNC Symbol;Acc:HGNC:16860]	-	-	0	MSTRG.10887:MSTRG.7998:MSTRG.23420:MSTRG.2484:MSTRG.1218:MSTRG.9193:MSTRG.19528:MSTRG.9479:MSTRG.5625:MSTRG.2171:MSTRG.22528:MSTRG.19546:MSTRG.7741:MSTRG.22295:MSTRG.19765:MSTRG.3929:MSTRG.6819:MSTRG.11814:MSTRG.10087:MSTRG.20250:MSTRG.13758:MSTRG.18815:MSTRG.21195:SMESG000072873.1:MSTRG.19883:MSTRG.3843:MSTRG.5337:MSTRG.14880:MSTRG.5693:MSTRG.10837:MSTRG.18451:MSTRG.12975:MSTRG.17474:MSTRG.23304…	arnt-1:Lox5a:Lox5b:egr*-2:egr4-1:egr4-2:ets-1:foxA(P):foxC1:foxC2:foxD1:foxD2:foxD3:foxF1 :foxF2:foxG:foxL1:foxO:pou-p1:foxP:foxN(P):foxQ/D:foxJ1-1:foxJ1-2:foxJ1-3:foxJ1-4:foxJ1-5:foxN2/3-1:foxN2/3-2:foxN2/3-3:foxK1:foxK2:foxK3:fezf2:gfi1:zfp541:zfhx3:nkx6-2:hnf4:Hox4b:hesl-2:nkx3-1:nkx5-2:nkx5-1:lhx1-3:meis-1:a:pax6-1:pax6-2:phox:rfx7:ctcf:zfp-10:zfp677:snail-1:snail-2:srebp:ap4-1:yy2:zbed8:zeb-…	43
94	dd_Smes_g4_1	14629765	14630031	267	*	k27ac_pooled_april21_peak_859	6.423	Promoter	1	14584582	14630670	46089	2	MSTRG.562	SMEST026079001.1	639	0.910808	0.100691	-0.234558	-0.48938	0	0	0	0.100227	-0.83115	CCDC73	coiled-coil domain containing 73 [Source:HGNC Symbol;Acc:HGNC:23261]	-	-	0	MSTRG.7998:MSTRG.23420:MSTRG.21923:MSTRG.9638:MSTRG.1217:MSTRG.4483:MSTRG.17936:MSTRG.19544:MSTRG.4288:MSTRG.4289:MSTRG.22163:MSTRG.16827:MSTRG.9571:MSTRG.624:MSTRG.11386:MSTRG.22087:MSTRG.10044:MSTRG.5025:MSTRG.20458:MSTRG.22126:SMESG000049970.1:SMESG000031904.1:MSTRG.221:MSTRG.2221:MSTRG.2484:MSTRG.1218:MSTRG.9193:MSTRG.10604:MSTRG.9479:MSTRG.5625:MSTRG.2171:MSTRG.22528:MSTRG.19546:MSTRG.7741:M…	Lox5a:Lox5b:barhl2-1:barhl2-2:egr-5:znf362:zf-4:creb3l-1:hinfp-1:hinfp-2:rest-1:zfp674:znf-1:znf91:znf333-1:znf652:zscan2-2:zscan2-6:rest-2:zfp560-1:zscan2-5:zscan2-8:zf-6:dbx:egr*-2:egr4-1:egr4-2:ets-3:foxA(P):foxC1:foxC2:foxD1:foxD2:foxD3:foxG:foxL1:foxO:foxN(P):foxK1:foxK2:foxK3:gata123:gata456-3:gcm-2:gli-1:gli-2:gli-3:fezf2:gfi1:zfp541:zfhx3:prdm14:nkx6-2:nerfin2-1:atmin:zscan2-4:klf-3:klf-1…	70
95	dd_Smes_g4_1	14752277	14752714	438	*	k27ac_pooled_april21_peak_863	2.86838	Intron (MSTRG.567.1/MSTRG.567, intron 2 of 2)	1	14732822	14750220	17399	2	MSTRG.567	MSTRG.567.3	-2057	34.214	0.203772	-0.165405	-0.100631	1	1	1	0.00522365	-0.567486	ELAPOR2	endosome-lysosome associated apoptosis and autophagy regulator family member 2 [Source:HGNC Symbol;Acc:HGNC:21945]	MSTRG.11405:MSTRG.4536	gcm-2:kdm5b	2	MSTRG.10887:MSTRG.7896:MSTRG.1217:MSTRG.4483:MSTRG.17936:MSTRG.19544:MSTRG.20458:MSTRG.2221:MSTRG.19091:MSTRG.9479:MSTRG.22528:MSTRG.19546:MSTRG.7741:MSTRG.22295:MSTRG.19765:MSTRG.3929:MSTRG.6819:MSTRG.11814:MSTRG.10087:MSTRG.20250:MSTRG.13758:MSTRG.20466:MSTRG.17923:MSTRG.19305:MSTRG.17848:MSTRG.9911:MSTRG.7427:MSTRG.1897:MSTRG.2717:MSTRG.586:MSTRG.14130:MSTRG.3824:MSTRG.6003:a:MSTRG.261:MSTRG.2…	arnt-1:znf596:egr-5:znf362:zf-4:creb3l-1:rest-2:dbx:coe:foxA(P):foxD1:foxD2:foxD3:foxF1 :foxF2:foxG:foxL1:foxO:pou-p1:foxP:foxN(P):gli-1:gli-2:hesl-2:isl-1:isl-2:lhx1-3:meis-1:mitfl-3:pdp1:nf-ya1:nf-ya2:nkx2l-1:a:nkx3-2:neuroD-2:olig:onecut-1:onecut-2:onecut-3:onecut-5:hnf6:cux-2:pax2/5/8-1:zfp-7:rfx7:snail-1:snail-2:srebp:six3:six6-2:six6-3:six4:Tbx-2/3a:Tbx-2/3c:ap4-1:znf143:egr-1:ovo-1:prdm13:…	51
96	dd_Smes_g4_1	14752309	14752714	406	*	k27ac_pooled_april21_peak_864	2.77115	Intron (MSTRG.567.1/MSTRG.567, intron 2 of 2)	1	14732304	14754772	22469	2	MSTRG.567	MSTRG.567.1	2058	34.214	0.203772	-0.146699	-0.102351	1	1	1	0.00522365	-0.567486	ELAPOR2	endosome-lysosome associated apoptosis and autophagy regulator family member 2 [Source:HGNC Symbol;Acc:HGNC:21945]	MSTRG.11405:MSTRG.4536	gcm-2:kdm5b	2	MSTRG.10887:MSTRG.7896:MSTRG.1217:MSTRG.4483:MSTRG.17936:MSTRG.19544:MSTRG.20458:MSTRG.2221:MSTRG.19091:MSTRG.9479:MSTRG.22528:MSTRG.19546:MSTRG.7741:MSTRG.22295:MSTRG.19765:MSTRG.3929:MSTRG.6819:MSTRG.11814:MSTRG.10087:MSTRG.20250:MSTRG.13758:MSTRG.20466:MSTRG.17923:MSTRG.19305:MSTRG.17848:MSTRG.9911:MSTRG.7427:MSTRG.1897:MSTRG.2717:MSTRG.586:MSTRG.14130:MSTRG.3824:MSTRG.6003:a:MSTRG.261:MSTRG.2…	arnt-1:znf596:egr-5:znf362:zf-4:creb3l-1:rest-2:dbx:coe:foxA(P):foxD1:foxD2:foxD3:foxF1 :foxF2:foxG:foxL1:foxO:pou-p1:foxP:foxN(P):gli-1:gli-2:hesl-2:isl-1:isl-2:lhx1-3:meis-1:mitfl-3:pdp1:nf-ya1:nf-ya2:nkx2l-1:a:nkx3-2:neuroD-2:olig:onecut-1:onecut-2:onecut-3:onecut-5:hnf6:cux-2:pax2/5/8-1:znf181:zbtb24:ski-1:zfp-7:rfx7:snail-1:snail-2:srebp:six3:six6-2:six6-3:six4:Tbx-2/3a:Tbx-2/3c:ap4-1:znf143…	52
97	dd_Smes_g4_1	14869693	14870255	563	*	k27ac_pooled_april21_peak_871	3.59791	Distal Intergenic	1	14875257	14876913	1657	2	MSTRG.572	SMEST026100001.1	6658	2.55006	0.524782	-0.350856	-0.193559	1	1	1	0.0111034	-0.584001	IRX6	iroquois homeobox 6 [Source:HGNC Symbol;Acc:HGNC:14675]	-	-	0	MSTRG.10887:MSTRG.7998:MSTRG.23420:MSTRG.5414:MSTRG.4288:MSTRG.4289:MSTRG.22163:MSTRG.16827:MSTRG.9571:MSTRG.624:MSTRG.11386:MSTRG.22087:MSTRG.10044:MSTRG.5025:MSTRG.20458:MSTRG.22126:SMESG000049970.1:SMESG000031904.1:MSTRG.221:MSTRG.19091:MSTRG.2484:MSTRG.1218:MSTRG.9193:MSTRG.18815:MSTRG.21195:SMESG000072873.1:MSTRG.19883:MSTRG.3843:MSTRG.5337:MSTRG.14880:MSTRG.5693:MSTRG.10837:MSTRG.20466:MSTR…	arnt-1:Lox5a:Lox5b:tlx-1:hinfp-1:hinfp-2:rest-1:zfp674:znf-1:znf91:znf333-1:znf652:zscan2-2:zscan2-6:rest-2:zfp560-1:zscan2-5:zscan2-8:zf-6:coe:egr*-2:egr4-1:egr4-2:foxQ/D:foxJ1-1:foxJ1-2:foxJ1-3:foxJ1-4:foxJ1-5:foxN2/3-1:foxN2/3-2:foxN2/3-3:gli-1:gli-2:gata456-1:gata456-2:gata456-4:hesl-3:nkx6-2:hnf4:hesl-2:nkx5-1:Hox1:Hox4a:nerfin2-1:atmin:zscan2-4:klf-3:klf-1:egr-2:lhx1-3:lhx3:meis-1:smad1:sma…	74
98	dd_Smes_g4_1	14875590	14875964	375	*	k27ac_pooled_april21_peak_873	10.8463	Promoter	1	14875257	14876913	1657	2	MSTRG.572	SMEST026100001.1	949	2.55006	0.524782	-0.133323	-0.461195	1	1	1	0.0111034	-0.584001	IRX6	iroquois homeobox 6 [Source:HGNC Symbol;Acc:HGNC:14675]	MSTRG.4288:MSTRG.4289:MSTRG.22163:MSTRG.16827:MSTRG.9571:MSTRG.624:MSTRG.11386:MSTRG.22087:MSTRG.10044:MSTRG.5025	hinfp-1:hinfp-2:rest-1:zfp674:znf-1:znf91:znf333-1:znf652:zscan2-2:zscan2-6	1	MSTRG.10887:MSTRG.7896:MSTRG.9597:MSTRG.6974:MSTRG.1217:MSTRG.4483:MSTRG.17936:MSTRG.5414:MSTRG.12684:MSTRG.20458:MSTRG.2221:MSTRG.2484:MSTRG.1218:MSTRG.9193:MSTRG.11379:MSTRG.22994:MSTRG.4327:MSTRG.19528:MSTRG.2656:MSTRG.23472:MSTRG.18815:MSTRG.21195:SMESG000072873.1:MSTRG.19883:MSTRG.3843:MSTRG.5337:MSTRG.14880:MSTRG.5693:MSTRG.10837:MSTRG.20466:MSTRG.17923:MSTRG.12700:MSTRG.8018:MSTRG.11935:MS…	arnt-1:znf596:pax3/7-1:alx3-2:egr-5:znf362:zf-4:tlx-1:nkx5-3:rest-2:dbx:egr*-2:egr4-1:egr4-2:ets-5:fli-2:fli-3:ets-1:etv4:fli-1:foxQ/D:foxJ1-1:foxJ1-2:foxJ1-3:foxJ1-4:foxJ1-5:foxN2/3-1:foxN2/3-2:foxN2/3-3:gli-1:gli-2:gata456-1:gata456-2:gata456-4:fezf2:gfi1:zfp541:zfhx3:hesl-2:Hox1:Hox4a:Hox3a:nerfin2-1:isl-1:isl-2:atmin:zscan2-4:cbt:klf-3:klf-1:egr-2:lhx2-3:lhx1-3:meis-1:msx:smad1:smad9:neuroD-1…	71
99	dd_Smes_g4_1	14877357	14877848	492	*	k27ac_pooled_april21_peak_874	4.07059	Promoter	1	14875299	14877219	1921	2	MSTRG.572	MSTRG.572.4	-138	2.55006	0.524782	-0.199887	-0.496773	1	1	1	0.0111034	-0.584001	IRX6	iroquois homeobox 6 [Source:HGNC Symbol;Acc:HGNC:14675]	-	-	0	MSTRG.9597:MSTRG.6974:MSTRG.21923:MSTRG.9638:MSTRG.23513:MSTRG.10410:SMESG000022963.1:MSTRG.1217:MSTRG.4483:MSTRG.17936:MSTRG.5414:MSTRG.12684:MSTRG.4288:MSTRG.4289:MSTRG.22163:MSTRG.16827:MSTRG.9571:MSTRG.624:MSTRG.11386:MSTRG.22087:MSTRG.10044:MSTRG.5025:MSTRG.20458:MSTRG.2484:MSTRG.1218:MSTRG.9193:MSTRG.11379:MSTRG.22994:MSTRG.4327:MSTRG.19528:MSTRG.2656:MSTRG.23472:MSTRG.22295:MSTRG.19765:MST…	pax3/7-1:alx3-2:barhl2-1:barhl2-2:e22/23:bsx:barhl1:egr-5:znf362:zf-4:tlx-1:nkx5-3:hinfp-1:hinfp-2:rest-1:zfp674:znf-1:znf91:znf333-1:znf652:zscan2-2:zscan2-6:rest-2:egr*-2:egr4-1:egr4-2:ets-5:fli-2:fli-3:ets-1:etv4:fli-1:foxF1 :foxF2:gcm-2:gli-3:hnf4:nkx5-1:Hox1:Hox4a:Hox3a:nerfin2-1:atmin:zscan2-4:cbt:klf-1:lbx:lhx2-3:lmx1-1:lhx1-1:lhx1-4:lhx1-3:lhx3:meis-1:musculin:msx:smad1:smad9:myoD:neuroD-…	88
100	dd_Smes_g4_1	14878539	14879092	554	*	k27ac_pooled_april21_peak_875	2.55561	Distal Intergenic	1	14875299	14877219	1921	2	MSTRG.572	MSTRG.572.4	-1320	2.55006	0.524782	-0.586518	-1.02151	1	1	1	0.0111034	-0.584001	IRX6	iroquois homeobox 6 [Source:HGNC Symbol;Acc:HGNC:14675]	-	-	0	MSTRG.10887:MSTRG.7896:MSTRG.7998:MSTRG.23420:MSTRG.23513:MSTRG.12684:MSTRG.4288:MSTRG.4289:MSTRG.22163:MSTRG.16827:MSTRG.9571:MSTRG.624:MSTRG.11386:MSTRG.22087:MSTRG.10044:MSTRG.5025:MSTRG.2221:MSTRG.2484:MSTRG.1218:MSTRG.9193:MSTRG.11379:MSTRG.22994:MSTRG.4327:MSTRG.19528:MSTRG.2656:MSTRG.2731:MSTRG.23472:MSTRG.5625:MSTRG.2171:MSTRG.10087:MSTRG.20250:MSTRG.18815:MSTRG.21195:SMESG000072873.1:MST…	arnt-1:znf596:Lox5a:Lox5b:e22/23:nkx5-3:hinfp-1:hinfp-2:rest-1:zfp674:znf-1:znf91:znf333-1:znf652:zscan2-2:zscan2-6:dbx:egr*-2:egr4-1:egr4-2:ets-5:fli-2:fli-3:ets-1:etv4:elf1:fli-1:foxC1:foxC2:pou-p1:foxP:foxQ/D:foxJ1-1:foxJ1-2:foxJ1-3:foxJ1-4:foxJ1-5:foxN2/3-1:foxN2/3-2:foxN2/3-3:foxK1:foxK2:foxK3:gcm-2:gli-3:prdm14:nkx6-2:Hox3a:nerfin2-1:atmin:zscan2-4:cbt:klf-1:egr-2:lhx1-3:meis-1:musculin:myo…	79
101	dd_Smes_g4_1	14878973	14879092	120	*	k27ac_pooled_april21_peak_876	8.42226	Distal Intergenic	1	14875299	14877219	1921	2	MSTRG.572	MSTRG.572.4	-1754	2.55006	0.524782	-0.650807	-1.10195	1	1	1	0.0111034	-0.584001	IRX6	iroquois homeobox 6 [Source:HGNC Symbol;Acc:HGNC:14675]	-	-	0	MSTRG.10887:MSTRG.7896:MSTRG.7998:MSTRG.23420:MSTRG.1217:MSTRG.4483:MSTRG.17936:MSTRG.12684:MSTRG.4288:MSTRG.4289:MSTRG.22163:MSTRG.16827:MSTRG.9571:MSTRG.624:MSTRG.11386:MSTRG.22087:MSTRG.10044:MSTRG.5025:MSTRG.20458:MSTRG.2221:MSTRG.5081:MSTRG.11379:MSTRG.22994:MSTRG.4327:MSTRG.19528:MSTRG.2656:MSTRG.2731:MSTRG.23472:MSTRG.5625:MSTRG.2171:MSTRG.10087:MSTRG.20250:MSTRG.18815:MSTRG.21195:SMESG000…	arnt-1:znf596:Lox5a:Lox5b:egr-5:znf362:zf-4:nkx5-3:hinfp-1:hinfp-2:rest-1:zfp674:znf-1:znf91:znf333-1:znf652:zscan2-2:zscan2-6:rest-2:dbx:emx1:ets-5:fli-2:fli-3:ets-1:etv4:elf1:fli-1:foxC1:foxC2:pou-p1:foxP:foxQ/D:foxJ1-1:foxJ1-2:foxJ1-3:foxJ1-4:foxJ1-5:foxN2/3-1:foxN2/3-2:foxN2/3-3:foxK1:foxK2:foxK3:gli-3:prdm14:nkx6-2:Hox1:Hox4a:Hox3a:egr-2:lhx1-3:meis-1:meox:musculin:myoD:nf-ya1:nf-ya2:nr2f1:n…	70
102	dd_Smes_g4_1	14879763	14879973	211	*	k27ac_pooled_april21_peak_876	8.42226	Distal Intergenic	1	14875299	14877219	1921	2	MSTRG.572	MSTRG.572.4	-2544	2.55006	0.524782	-0.650807	-1.10195	1	1	1	0.0111034	-0.584001	IRX6	iroquois homeobox 6 [Source:HGNC Symbol;Acc:HGNC:14675]	-	-	0	MSTRG.10887:MSTRG.7896:MSTRG.7998:MSTRG.23420:MSTRG.1217:MSTRG.4483:MSTRG.17936:MSTRG.12684:MSTRG.4288:MSTRG.4289:MSTRG.22163:MSTRG.16827:MSTRG.9571:MSTRG.624:MSTRG.11386:MSTRG.22087:MSTRG.10044:MSTRG.5025:MSTRG.20458:MSTRG.2221:MSTRG.5081:MSTRG.11379:MSTRG.22994:MSTRG.4327:MSTRG.19528:MSTRG.2656:MSTRG.2731:MSTRG.23472:MSTRG.5625:MSTRG.2171:MSTRG.10087:MSTRG.20250:MSTRG.18815:MSTRG.21195:SMESG000…	arnt-1:znf596:Lox5a:Lox5b:egr-5:znf362:zf-4:nkx5-3:hinfp-1:hinfp-2:rest-1:zfp674:znf-1:znf91:znf333-1:znf652:zscan2-2:zscan2-6:rest-2:dbx:emx1:ets-5:fli-2:fli-3:ets-1:etv4:elf1:fli-1:foxC1:foxC2:pou-p1:foxP:foxQ/D:foxJ1-1:foxJ1-2:foxJ1-3:foxJ1-4:foxJ1-5:foxN2/3-1:foxN2/3-2:foxN2/3-3:foxK1:foxK2:foxK3:gli-3:prdm14:nkx6-2:Hox1:Hox4a:Hox3a:klf-3:egr-2:lbx:lhx1-3:lhx3:meis-1:meox:musculin:myoD:nf-ya1…	73
103	dd_Smes_g4_1	14883310	14883543	234	*	k27ac_pooled_april21_peak_878	3.13277	Distal Intergenic	1	14888131	14888974	844	1	MSTRG.571	MSTRG.571.1	-4588	1.94565	0.608194	-0.580928	-0.601608	0	0	0	0.989081	0.019247	TRAF6	TNF receptor associated factor 6 [Source:HGNC Symbol;Acc:HGNC:12036]	-	-	0	MSTRG.7896:MSTRG.7998:MSTRG.23420:MSTRG.12684:MSTRG.4288:MSTRG.4289:MSTRG.22163:MSTRG.16827:MSTRG.9571:MSTRG.624:MSTRG.11386:MSTRG.22087:MSTRG.10044:MSTRG.5025:MSTRG.2221:MSTRG.14008:MSTRG.19091:MSTRG.10604:MSTRG.9479:MSTRG.5625:MSTRG.2171:MSTRG.22528:MSTRG.19546:MSTRG.7741:MSTRG.22295:MSTRG.19765:MSTRG.3929:MSTRG.6819:MSTRG.11814:MSTRG.10087:MSTRG.20250:MSTRG.13758:MSTRG.18815:MSTRG.21195:SMESG0…	znf596:Lox5a:Lox5b:nkx5-3:hinfp-1:hinfp-2:rest-1:zfp674:znf-1:znf91:znf333-1:znf652:zscan2-2:zscan2-6:dbx:dll-1:coe:ets-3:foxA(P):foxC1:foxC2:foxD1:foxD2:foxD3:foxF1 :foxF2:foxG:foxL1:foxO:pou-p1:foxP:foxN(P):foxQ/D:foxJ1-1:foxJ1-2:foxJ1-3:foxJ1-4:foxJ1-5:foxN2/3-1:foxN2/3-2:foxN2/3-3:foxK1:foxK2:foxK3:nkx6-2:Hox4b:hesl-2:nerfin2-1:egr-2:lbx:lhx2-3:lmx1-1:lhx1-3:lhx3:meis-1:mlx:msx:pdp1:nf-ya1:nf…	68
104	dd_Smes_g4_1	14884300	14884653	354	*	k27ac_pooled_april21_peak_879	6.44541	Distal Intergenic	1	14888131	14888974	844	1	MSTRG.571	MSTRG.571.1	-3478	1.94565	0.608194	-0.632512	-0.464565	0	0	0	0.989081	0.019247	TRAF6	TNF receptor associated factor 6 [Source:HGNC Symbol;Acc:HGNC:12036]	-	-	0	MSTRG.7896:MSTRG.7998:MSTRG.23420:MSTRG.12684:MSTRG.19544:MSTRG.20458:MSTRG.2221:MSTRG.14008:MSTRG.2484:MSTRG.1218:MSTRG.9193:MSTRG.10604:MSTRG.11379:MSTRG.22994:MSTRG.4327:MSTRG.19528:MSTRG.23472:MSTRG.9479:MSTRG.5625:MSTRG.2171:MSTRG.22528:MSTRG.19546:MSTRG.7741:MSTRG.22295:MSTRG.19765:MSTRG.3929:MSTRG.6819:MSTRG.11814:MSTRG.10087:MSTRG.20250:MSTRG.13758:MSTRG.18815:MSTRG.21195:SMESG000072873.1…	znf596:Lox5a:Lox5b:nkx5-3:creb3l-1:rest-2:dbx:dll-1:egr*-2:egr4-1:egr4-2:ets-3:ets-5:fli-2:fli-3:ets-1:fli-1:foxA(P):foxC1:foxC2:foxD1:foxD2:foxD3:foxF1 :foxF2:foxG:foxL1:foxO:pou-p1:foxP:foxN(P):foxQ/D:foxJ1-1:foxJ1-2:foxJ1-3:foxJ1-4:foxJ1-5:foxN2/3-1:foxN2/3-2:foxN2/3-3:foxK1:foxK2:foxK3:gata123:gata456-3:gata456-1:gata456-2:gata456-4:fezf2:gfi1:zfp541:zfhx3:hesl-3:nkx6-2:Hox4b:hesl-2:atmin:zsc…	100
105	dd_Smes_g4_1	14888691	14888715	25	*	k27ac_pooled_april21_peak_881	5.00233	Promoter	1	14888131	14888974	844	1	MSTRG.571	MSTRG.571.1	560	1.94565	0.608194	-0.075864	0.0506262	0	0	0	0.989081	0.019247	TRAF6	TNF receptor associated factor 6 [Source:HGNC Symbol;Acc:HGNC:12036]	MSTRG.3339	onecut-4	1	MSTRG.23513:MSTRG.20458:MSTRG.2221:MSTRG.19528:MSTRG.5625:MSTRG.2171:MSTRG.22528:MSTRG.19546:MSTRG.7741:MSTRG.22295:MSTRG.19765:MSTRG.3929:MSTRG.6819:MSTRG.11814:MSTRG.11405:MSTRG.12700:MSTRG.8018:MSTRG.11935:MSTRG.23304:MSTRG.8862:MSTRG.5535:MSTRG.17691:MSTRG.16138:MSTRG.7792:MSTRG.6856:MSTRG.10592:MSTRG.17155:SMESG000049967.1:MSTRG.10215:MSTRG.15979:MSTRG.7427:MSTRG.8925:MSTRG.4330:MSTRG.14931:…	e22/23:rest-2:dbx:ets-1:foxC1:foxC2:foxD1:foxD2:foxD3:foxF1 :foxF2:foxG:foxL1:foxO:gcm-2:gata456-1:gata456-2:gata456-4:fezf2:gfi1:zfp541:zfhx3:prdm14:nkx3-1:nkx5-2:nkx5-1:atmin:zscan2-4:cbt:klf-1:lhx1-3:sall4:fir1:zfp-8:zfp236-1:zfp354:znf101:znf425:znf660:lmpt-3:smad1:smad9:mitfl-3:nf-ya1:nf-ya2:nkx2l-1:a:nr2f1:nr4a-1:nr4a-2:nr-1:nr2e1:tlx-2:hr51:neuroD-2:olig:pax2/5/8-1:pou4-1:pou4-2:kdm5b:ctcf…	60
106	dd_Smes_g4_1	15077751	15078018	268	*	k27ac_pooled_april21_peak_892	3.70272	Promoter	1	15077021	15117512	40492	1	MSTRG.579	MSTRG.579.14	730	13.9566	0.375211	0.179566	-0.0634479	0	0	0	0.325636	-0.160772	TRPA1	transient receptor potential cation channel subfamily A member 1 [Source:HGNC Symbol;Acc:HGNC:497]	-	-	0	MSTRG.10887:MSTRG.7896:MSTRG.7998:MSTRG.23420:MSTRG.21923:MSTRG.9638:SMESG000022963.1:MSTRG.12684:MSTRG.19544:MSTRG.4288:MSTRG.4289:MSTRG.22163:MSTRG.16827:MSTRG.9571:MSTRG.624:MSTRG.11386:MSTRG.22087:MSTRG.10044:MSTRG.5025:MSTRG.20458:MSTRG.2221:MSTRG.14008:MSTRG.2484:MSTRG.1218:MSTRG.9193:MSTRG.10087:MSTRG.20250:MSTRG.18451:MSTRG.12975:MSTRG.17474:MSTRG.23309:MSTRG.9120:MSTRG.20466:MSTRG.17923:…	arnt-1:znf596:Lox5a:Lox5b:barhl2-1:barhl2-2:barhl1:nkx5-3:creb3l-1:hinfp-1:hinfp-2:rest-1:zfp674:znf-1:znf91:znf333-1:znf652:zscan2-2:zscan2-6:rest-2:dbx:dll-1:egr*-2:egr4-1:egr4-2:pou-p1:foxP:foxK1:foxK2:foxK3:gata123:gata456-3:gli-1:gli-2:gli-3:gata456-1:gata456-2:gata456-4:prdm14:hesl-3:nkx6-2:hnf4:Hox4b:nkx3-1:nkx5-2:nkx5-1:atmin:zscan2-4:cbt:klf-3:klf-1:lhx2-1:lhx2-4:lhx2-3:lmx1-1:lhx1-3:mei…	79
107	dd_Smes_g4_1	15273805	15274020	216	*	k27ac_pooled_april21_peak_905	9.8237	Distal Intergenic	1	15261805	15266045	4241	2	MSTRG.585	MSTRG.585.4	-7760	13.9472	0.477701	-0.108533	-0.528976	1	1	1	0.0368457	-0.290372	WDR46	WD repeat domain 46 [Source:HGNC Symbol;Acc:HGNC:13923]	-	-	0	MSTRG.7896:MSTRG.9597:MSTRG.6974:MSTRG.21923:MSTRG.9638:MSTRG.1217:MSTRG.4483:MSTRG.17936:MSTRG.12684:MSTRG.4288:MSTRG.4289:MSTRG.22163:MSTRG.16827:MSTRG.9571:MSTRG.624:MSTRG.11386:MSTRG.22087:MSTRG.10044:MSTRG.5025:MSTRG.20458:MSTRG.22126:SMESG000049970.1:SMESG000031904.1:MSTRG.221:MSTRG.2221:MSTRG.2484:MSTRG.1218:MSTRG.9193:MSTRG.10604:MSTRG.5081:MSTRG.2731:MSTRG.22295:MSTRG.19765:MSTRG.10087:M…	znf596:pax3/7-1:alx3-2:barhl2-1:barhl2-2:egr-5:znf362:zf-4:nkx5-3:hinfp-1:hinfp-2:rest-1:zfp674:znf-1:znf91:znf333-1:znf652:zscan2-2:zscan2-6:rest-2:zfp560-1:zscan2-5:zscan2-8:zf-6:dbx:egr*-2:egr4-1:egr4-2:ets-3:emx1:elf1:foxF1 :foxF2:pou-p1:foxP:hnf4:hesl-2:Hox3a:nerfin2-1:cbt:klf-3:klf-1:lbx:lhx2-1:lhx2-4:lhx1-3:lhx3:Mef2-2:meis-1:meox:myoD:pdp1:nf-ya1:nf-ya2:a:otx-1:otx-2:pitx:Pbx-4:Prep:Xfin:…	71
108	dd_Smes_g4_1	15276117	15276383	267	*	k27ac_pooled_april21_peak_907	6.50095	Distal Intergenic	1	15283770	15287089	3320	1	MSTRG.586	SMEST026144001.1	-7387	2.35968	0.115273	-0.38553	-0.466346	1	1	1	7.88101e-06	-1.18218	DBP	D-box binding PAR bZIP transcription factor [Source:HGNC Symbol;Acc:HGNC:2697]	MSTRG.10887:MSTRG.22126:SMESG000049970.1:SMESG000031904.1:MSTRG.221:MSTRG.2484:MSTRG.1218:MSTRG.9193:MSTRG.9479:MSTRG.20466:MSTRG.17923:MSTRG.19305:MSTRG.12851:MSTRG.2717:MSTRG.19581:MSTRG.18805:MSTRG.261:MSTRG.22726:MSTRG.17998:MSTRG.2111:MSTRG.5260:MSTRG.23512:MSTRG.9977:MSTRG.22489:MSTRG.17678:MSTRG.7606:MSTRG.396:MSTRG.22605:MSTRG.11197:MSTRG.22732:MSTRG.308:MSTRG.1201:MSTRG.8933:MSTRG.8827:M…	arnt-1:zfp560-1:zscan2-5:zscan2-8:zf-6:egr*-2:egr4-1:egr4-2:foxA(P):gli-1:gli-2:hesl-2:nerfin2-1:mitfl-3:neuroD-1:fer3l-3:nkx3-2:neuroD-2:olig:pax2/5/8-1:ctcf:zfp-10:zfp677:snail-1:snail-2:sp5:klf-2:mitfl-2:egr-1:ovo-1:prdm13:gl:znf341:egr4-3:irx-1:irx6-1:irx6-2:irx6-3:znf180:zscan2-3	21	MSTRG.10887:MSTRG.10410:SMESG000022963.1:MSTRG.5414:MSTRG.2221:MSTRG.14008:MSTRG.5081:MSTRG.11405:MSTRG.12700:MSTRG.8018:MSTRG.11935:MSTRG.16138:MSTRG.4403:MSTRG.13843:MSTRG.7792:MSTRG.6856:MSTRG.10592:MSTRG.23578:MSTRG.20904:MSTRG.9913:MSTRG.2271:MSTRG.4069:MSTRG.17209:MSTRG.1469:MSTRG.13692:MSTRG.5965:MSTRG.7427:MSTRG.20979:MSTRG.1897:MSTRG.18714:MSTRG.6954:MSTRG.4208:MSTRG.16892:MSTRG.14130:MS…	arnt-1:bsx:barhl1:tlx-1:dbx:dll-1:emx1:gcm-2:gata456-1:gata456-2:gata456-4:prdm14:hnf4:Hox4b:nkx3-1:nkx5-2:nkx5-1:Hox1:Hox4a:Hox3a:egr-2:lhx2-1:lhx2-4:lhx2-3:lhx1-1:lhx1-4:lhx1-3:lhx3:meis-1:meox:msx:smad1:smad9:nf-ya1:nf-ya2:pax6-1:pax6-2:pou4-1:pou4-2:znf181:zbtb24:ski-1:rfx3:kdm5b:rx:shox:six4:uncx:yy2:zbed8:rreb1:zfp-6:zf-2:zf-8:alx4:prdm1-1:zfp-3:zfp878:zbed1:zscan2-7:Pbx-1:Pbx-2:hb-1:hb-2:m…	48
109	dd_Smes_g4_1	15276934	15277603	670	*	k27ac_pooled_april21_peak_908	6.84727	Distal Intergenic	1	15283770	15287089	3320	1	MSTRG.586	SMEST026144001.1	-6167	2.35968	0.115273	-0.330748	-0.622046	1	1	1	7.88101e-06	-1.18218	DBP	D-box binding PAR bZIP transcription factor [Source:HGNC Symbol;Acc:HGNC:2697]	MSTRG.10887:MSTRG.22126:SMESG000049970.1:SMESG000031904.1:MSTRG.221:MSTRG.2484:MSTRG.1218:MSTRG.9193:MSTRG.9479:MSTRG.20466:MSTRG.17923:MSTRG.19305:MSTRG.12851:MSTRG.2717:MSTRG.19581:MSTRG.18805:MSTRG.261:MSTRG.22726:MSTRG.17998:MSTRG.2111:MSTRG.5260:MSTRG.23512:MSTRG.9977:MSTRG.22489:MSTRG.17678:MSTRG.7606:MSTRG.396:MSTRG.22605:MSTRG.11197:MSTRG.22732:MSTRG.308:MSTRG.1201:MSTRG.8933:MSTRG.8827:M…	arnt-1:zfp560-1:zscan2-5:zscan2-8:zf-6:egr*-2:egr4-1:egr4-2:foxA(P):gli-1:gli-2:hesl-2:nerfin2-1:mitfl-3:neuroD-1:fer3l-3:nkx3-2:neuroD-2:olig:pax2/5/8-1:ctcf:zfp-10:zfp677:snail-1:snail-2:sp5:klf-2:mitfl-2:egr-1:ovo-1:prdm13:gl:znf341:egr4-3:irx-1:irx6-1:irx6-2:irx6-3:znf180:zscan2-3	21	MSTRG.10887:MSTRG.21923:MSTRG.9638:MSTRG.10410:SMESG000022963.1:MSTRG.5414:MSTRG.12684:MSTRG.19544:MSTRG.2221:MSTRG.14008:MSTRG.10604:MSTRG.5081:MSTRG.11379:MSTRG.22994:MSTRG.4327:MSTRG.19528:MSTRG.23472:MSTRG.11405:MSTRG.23304:MSTRG.8862:MSTRG.5535:MSTRG.17691:MSTRG.16138:MSTRG.3741:MSTRG.4403:MSTRG.13843:MSTRG.7792:MSTRG.6856:MSTRG.10592:MSTRG.23578:MSTRG.20904:MSTRG.9913:MSTRG.4069:MSTRG.17209…	arnt-1:barhl2-1:barhl2-2:bsx:barhl1:tlx-1:nkx5-3:creb3l-1:dbx:dll-1:ets-3:emx1:ets-5:fli-2:fli-3:ets-1:fli-1:gcm-2:fezf2:gfi1:zfp541:zfhx3:prdm14:hesl-3:hnf4:Hox4b:nkx3-1:nkx5-2:nkx5-1:Hox1:Hox4a:Hox3a:lhx2-1:lhx2-4:lhx2-3:lhx1-1:lhx1-4:lhx1-3:lhx3:meis-1:meox:msx:smad1:smad9:nf-ya1:nf-ya2:Xfin:zfp-4:zbed-1:zf-5:pou4-1:pou4-2:znf181:zbtb24:ski-1:zfp-7:rfx3:kdm5b:rx:shox:six4:uncx:yy2:zbed8:rreb1:…	60
110	dd_Smes_g4_1	15277389	15277822	434	*	k27ac_pooled_april21_peak_909	6.01707	Distal Intergenic	1	15283770	15287089	3320	1	MSTRG.586	SMEST026144001.1	-5948	2.35968	0.115273	-0.29436	-0.619583	1	1	1	7.88101e-06	-1.18218	DBP	D-box binding PAR bZIP transcription factor [Source:HGNC Symbol;Acc:HGNC:2697]	MSTRG.10887:MSTRG.22126:SMESG000049970.1:SMESG000031904.1:MSTRG.221:MSTRG.2484:MSTRG.1218:MSTRG.9193:MSTRG.9479:MSTRG.20466:MSTRG.17923:MSTRG.19305:MSTRG.12851:MSTRG.2717:MSTRG.19581:MSTRG.18805:MSTRG.261:MSTRG.22726:MSTRG.17998:MSTRG.2111:MSTRG.5260:MSTRG.23512:MSTRG.9977:MSTRG.22489:MSTRG.17678:MSTRG.7606:MSTRG.396:MSTRG.22605:MSTRG.11197:MSTRG.22732:MSTRG.308:MSTRG.1201:MSTRG.8933:MSTRG.8827:M…	arnt-1:zfp560-1:zscan2-5:zscan2-8:zf-6:egr*-2:egr4-1:egr4-2:foxA(P):gli-1:gli-2:hesl-2:nerfin2-1:mitfl-3:neuroD-1:fer3l-3:nkx3-2:neuroD-2:olig:pax2/5/8-1:ctcf:zfp-10:zfp677:snail-1:snail-2:sp5:klf-2:mitfl-2:egr-1:ovo-1:prdm13:gl:znf341:egr4-3:irx-1:irx6-1:irx6-2:irx6-3:znf180:zscan2-3	21	MSTRG.10887:MSTRG.21923:MSTRG.9638:MSTRG.5414:MSTRG.12684:MSTRG.19544:MSTRG.2221:MSTRG.10604:MSTRG.11379:MSTRG.22994:MSTRG.4327:MSTRG.19528:MSTRG.23472:MSTRG.11405:MSTRG.23304:MSTRG.8862:MSTRG.5535:MSTRG.17691:MSTRG.3741:MSTRG.4403:MSTRG.9913:MSTRG.4069:MSTRG.17209:MSTRG.7427:MSTRG.20979:MSTRG.1897:MSTRG.4208:MSTRG.16892:MSTRG.14130:MSTRG.3824:MSTRG.6003:a:MSTRG.3565:MSTRG.7049:MSTRG.19418:MSTRG.…	arnt-1:barhl2-1:barhl2-2:tlx-1:nkx5-3:creb3l-1:dbx:ets-3:ets-5:fli-2:fli-3:ets-1:fli-1:gcm-2:fezf2:gfi1:zfp541:zfhx3:hesl-3:hnf4:Hox3a:lhx2-1:lhx2-4:lhx1-3:lhx3:meis-1:smad1:smad9:nf-ya1:nf-ya2:nkx2l-1:a:Xfin:zfp-4:zbed-1:zf-5:pou4-1:pou4-2:znf181:zbtb24:ski-1:zfp-7:gtf2b-4:kdm5b:scratch-like:smad4-1:six4:ap4-1:yy2:zbed8:rreb1:zfp-6:zf-2:zf-8:prdm15:zfp112:zfp408:znf486:alx4:prdm1-1:zfp-3:zfp878:…	48
111	dd_Smes_g4_1	15280595	15281483	889	*	k27ac_pooled_april21_peak_910	8.19825	Distal Intergenic	1	15283770	15287089	3320	1	MSTRG.586	SMEST026144001.1	-2287	2.35968	0.115273	-0.687274	-1.10419	1	1	1	7.88101e-06	-1.18218	DBP	D-box binding PAR bZIP transcription factor [Source:HGNC Symbol;Acc:HGNC:2697]	MSTRG.7998:MSTRG.23420:MSTRG.22295:MSTRG.19765:MSTRG.18815:MSTRG.21195:SMESG000072873.1:MSTRG.19883:MSTRG.3843:MSTRG.5337:MSTRG.14880:MSTRG.5693:MSTRG.10837:MSTRG.7287:MSTRG.1897:MSTRG.17044:MSTRG.18823:MSTRG.8332:MSTRG.2111:MSTRG.11128:MSTRG.13724:MSTRG.23026:MSTRG.1402:MSTRG.1743	Lox5a:Lox5b:foxF1 :foxF2:foxQ/D:foxJ1-1:foxJ1-2:foxJ1-3:foxJ1-4:foxJ1-5:foxN2/3-1:foxN2/3-2:foxN2/3-3:nkx6-2:meis-1:nr2f1:nr4a-1:nr4a-2:pax2/5/8-1:gtf2b-4:Lox4:meis-2:six1/2-2:six1/2-3	12	MSTRG.7896:MSTRG.5414:MSTRG.20458:MSTRG.22126:SMESG000049970.1:SMESG000031904.1:MSTRG.221:MSTRG.2221:MSTRG.11379:MSTRG.22994:MSTRG.4327:MSTRG.19528:MSTRG.2656:MSTRG.23472:MSTRG.11405:MSTRG.16138:MSTRG.19305:MSTRG.12851:MSTRG.15979:MSTRG.7427:MSTRG.4208:MSTRG.16892:MSTRG.2717:MSTRG.586:MSTRG.14130:MSTRG.3824:MSTRG.6003:a:MSTRG.23136:MSTRG.12215:MSTRG.21546:MSTRG.18649:MSTRG.4755:MSTRG.15832:MSTRG.…	znf596:tlx-1:rest-2:zfp560-1:zscan2-5:zscan2-8:zf-6:dbx:ets-5:fli-2:fli-3:ets-1:etv4:fli-1:gcm-2:prdm14:hesl-2:nerfin2-1:klf-1:lhx1-3:smad1:smad9:mitfl-3:pdp1:nf-ya1:nf-ya2:nkx2l-1:a:hr51:pax6-1:pax6-2:Pbx-4:Prep:pou1:zfp-7:rfx4:ctcf:zfp-10:zfp677:klf-2:six4:Tbx-1/10:Tbx-20:Tbx-2/3a:Tbx-2/3c:mitfl-2:zfp-2:zfp236-2:zfp560-2:znf799:zscan2-1:prdm15:zfp112:zfp408:znf486:alx4:irx-1:irx6-1:irx6-2:irx6-…	45
112	dd_Smes_g4_1	15284030	15284643	614	*	k27ac_pooled_april21_peak_911	5.7917	Promoter	1	15283770	15287089	3320	1	MSTRG.586	SMEST026144001.1	260	2.35968	0.115273	-0.48051	-0.454124	1	1	1	7.88101e-06	-1.18218	DBP	D-box binding PAR bZIP transcription factor [Source:HGNC Symbol;Acc:HGNC:2697]	MSTRG.7998:MSTRG.23420:MSTRG.2221:MSTRG.22295:MSTRG.19765:MSTRG.7287:MSTRG.13843:MSTRG.17155:SMESG000049967.1:MSTRG.15979:MSTRG.2717:MSTRG.5349:MSTRG.6378:MSTRG.19902:MSTRG.5260:MSTRG.23512:MSTRG.9977:MSTRG.9898:MSTRG.7606:MSTRG.15425:MSTRG.19918:MSTRG.21005:MSTRG.11197:MSTRG.22732:MSTRG.308:MSTRG.1201:MSTRG.8933:MSTRG.13724:MSTRG.19125:MSTRG.2385:MSTRG.22069:MSTRG.1684:SMESG000061747.1:MSTRG.451…	Lox5a:Lox5b:dbx:foxF1 :foxF2:nkx6-2:Hox4b:atmin:zscan2-4:klf-1:mitfl-3:znf181:zbtb24:ski-1:ctcf:zfp-10:zfp677:smad4-1:sp5:sp6-9:sp8:Tbx-20:egr-1:ovo-1:prdm13:gl:znf341:Lox4:prdm1-1:zfp-3:zfp878:zbed1:zscan2-7:ikzf1:zfp362:gcm-1:onecut-4:twist:pou2/3-1:pou2/3-2	22	MSTRG.7896:MSTRG.5414:MSTRG.19091:MSTRG.2484:MSTRG.1218:MSTRG.9193:MSTRG.10087:MSTRG.20250:MSTRG.18815:MSTRG.21195:SMESG000072873.1:MSTRG.19883:MSTRG.3843:MSTRG.5337:MSTRG.14880:MSTRG.5693:MSTRG.10837:MSTRG.20466:MSTRG.17923:MSTRG.2271:MSTRG.18888:MSTRG.4069:MSTRG.17209:MSTRG.7427:MSTRG.20979:MSTRG.18714:MSTRG.8925:MSTRG.4330:MSTRG.14931:MSTRG.12358:MSTRG.19417:MSTRG.432:MSTRG.21315:MSTRG.6529:MS…	znf596:tlx-1:coe:egr*-2:egr4-1:egr4-2:pou-p1:foxP:foxQ/D:foxJ1-1:foxJ1-2:foxJ1-3:foxJ1-4:foxJ1-5:foxN2/3-1:foxN2/3-2:foxN2/3-3:gli-1:gli-2:egr-2:lbx:lhx2-1:lhx2-4:lhx1-3:lhx3:meox:sall4:fir1:zfp-8:zfp236-1:zfp354:znf101:znf425:znf660:lmpt-3:a:nr2f1:nr4a-1:nr4a-2:pax6-1:pax6-2:pou4-1:pou4-2:pou6-2:gtf2b-4:scratch-like:klf-2:six4:alx4:irx-1:irx6-1:irx6-2:irx6-3:osr-1:osr-2:otp:ovo-2:ovo-3:rxra	30
113	dd_Smes_g4_1	15285494	15285858	365	*	k27ac_pooled_april21_peak_912	12.1006	Promoter	1	15285379	15287089	1711	1	MSTRG.586	MSTRG.586.2	115	2.35968	0.115273	-0.202765	-0.32875	1	1	1	7.88101e-06	-1.18218	DBP	D-box binding PAR bZIP transcription factor [Source:HGNC Symbol;Acc:HGNC:2697]	MSTRG.7998:MSTRG.23420:MSTRG.2221:MSTRG.2484:MSTRG.1218:MSTRG.9193:MSTRG.22295:MSTRG.19765:MSTRG.7287:MSTRG.13843:MSTRG.17155:SMESG000049967.1:MSTRG.10177:MSTRG.15979:MSTRG.4208:MSTRG.16892:MSTRG.2717:MSTRG.5349:MSTRG.6378:MSTRG.19902:MSTRG.5260:MSTRG.23512:MSTRG.9977:MSTRG.9898:MSTRG.7606:MSTRG.396:MSTRG.15425:MSTRG.19918:MSTRG.21005:MSTRG.11197:MSTRG.22732:MSTRG.308:MSTRG.1201:MSTRG.8933:MSTRG.…	Lox5a:Lox5b:dbx:egr*-2:egr4-1:egr4-2:foxF1 :foxF2:nkx6-2:Hox4b:atmin:zscan2-4:klf-3:klf-1:smad1:smad9:mitfl-3:znf181:zbtb24:ski-1:ctcf:zfp-10:zfp677:smad4-1:sp5:klf-2:sp6-9:sp8:Tbx-20:egr-1:ovo-1:prdm13:gl:znf341:Lox4:prdm1-1:zfp-3:zfp878:zbed1:zscan2-7:ikzf1:zfp362:gcm-1:onecut-4:twist:pou2/3-1:pou2/3-2	26	MSTRG.10887:MSTRG.6974:MSTRG.12684:MSTRG.19544:MSTRG.19091:MSTRG.10604:MSTRG.11379:MSTRG.22994:MSTRG.4327:MSTRG.19528:MSTRG.2656:MSTRG.2731:MSTRG.23472:MSTRG.10087:MSTRG.20250:MSTRG.22990:MSTRG.23304:MSTRG.8862:MSTRG.5535:MSTRG.17691:MSTRG.16138:MSTRG.7792:MSTRG.6856:MSTRG.23578:MSTRG.20904:MSTRG.9913:MSTRG.12851:MSTRG.10215:MSTRG.2271:MSTRG.7427:MSTRG.8925:MSTRG.4330:MSTRG.14931:MSTRG.12358:MSTR…	arnt-1:alx3-2:nkx5-3:creb3l-1:coe:ets-3:ets-5:fli-2:fli-3:ets-1:etv4:elf1:fli-1:pou-p1:foxP:gli-3:fezf2:gfi1:zfp541:zfhx3:prdm14:nkx3-1:nkx5-2:Hox1:Hox4a:Hox3a:nerfin2-1:cbt:egr-2:lhx1-3:sall4:fir1:zfp-8:zfp236-1:zfp354:znf101:znf425:znf660:lmpt-3:pdp1:nf-ya1:nf-ya2:nkx6-1:onecut-1:onecut-2:onecut-3:onecut-5:hnf6:cux-2:pax6-1:pax6-2:Xfin:zfp-4:zbed-1:zf-5:zfp-7:rfx3:rfx4:six4:tal:ptf-4:ap4-1:yy2:…	47
114	dd_Smes_g4_1	15544843	15544988	146	*	k27ac_pooled_april21_peak_921	7.78565	Intron (MSTRG.602.5/MSTRG.602, intron 8 of 18)	1	15529578	15552948	23371	1	MSTRG.602	MSTRG.602.9	15265	14.2043	0.174489	-0.371017	-0.477643	0	0	0	0.366605	0.210954	ADGRG4	adhesion G protein-coupled receptor G4 [Source:HGNC Symbol;Acc:HGNC:18992]	MSTRG.1217:MSTRG.4483:MSTRG.17936	egr-5:znf362:zf-4	1	MSTRG.7896:MSTRG.7998:MSTRG.23420:MSTRG.21923:MSTRG.9638:MSTRG.12684:MSTRG.4288:MSTRG.4289:MSTRG.22163:MSTRG.16827:MSTRG.9571:MSTRG.624:MSTRG.11386:MSTRG.22087:MSTRG.10044:MSTRG.5025:MSTRG.20458:MSTRG.22126:SMESG000049970.1:SMESG000031904.1:MSTRG.221:MSTRG.2221:MSTRG.2484:MSTRG.1218:MSTRG.9193:MSTRG.10604:MSTRG.5081:MSTRG.2656:MSTRG.2731:MSTRG.23472:MSTRG.9479:MSTRG.5625:MSTRG.2171:MSTRG.22528:MS…	znf596:Lox5a:Lox5b:barhl2-1:barhl2-2:nkx5-3:hinfp-1:hinfp-2:rest-1:zfp674:znf-1:znf91:znf333-1:znf652:zscan2-2:zscan2-6:rest-2:zfp560-1:zscan2-5:zscan2-8:zf-6:dbx:egr*-2:egr4-1:egr4-2:ets-3:emx1:etv4:elf1:fli-1:foxA(P):foxC1:foxC2:foxD1:foxD2:foxD3:foxG:foxL1:foxO:pou-p1:foxP:foxQ/D:foxJ1-1:foxJ1-2:foxJ1-3:foxJ1-4:foxJ1-5:foxN2/3-1:foxN2/3-2:foxN2/3-3:foxK1:foxK2:foxK3:gata123:gata456-3:gli-1:gli…	87
115	dd_Smes_g4_1	15545036	15545786	751	*	k27ac_pooled_april21_peak_922	4.64758	Intron (MSTRG.602.5/MSTRG.602, intron 8 of 18)	1	15529578	15552948	23371	1	MSTRG.602	MSTRG.602.9	15458	14.2043	0.174489	-0.236435	-0.29042	0	0	0	0.366605	0.210954	ADGRG4	adhesion G protein-coupled receptor G4 [Source:HGNC Symbol;Acc:HGNC:18992]	MSTRG.1217:MSTRG.4483:MSTRG.17936	egr-5:znf362:zf-4	1	MSTRG.7896:MSTRG.7998:MSTRG.23420:MSTRG.21923:MSTRG.9638:MSTRG.12684:MSTRG.4288:MSTRG.4289:MSTRG.22163:MSTRG.16827:MSTRG.9571:MSTRG.624:MSTRG.11386:MSTRG.22087:MSTRG.10044:MSTRG.5025:MSTRG.20458:MSTRG.22126:SMESG000049970.1:SMESG000031904.1:MSTRG.221:MSTRG.2221:MSTRG.2484:MSTRG.1218:MSTRG.9193:MSTRG.10604:MSTRG.5081:MSTRG.2656:MSTRG.2731:MSTRG.23472:MSTRG.9479:MSTRG.5625:MSTRG.2171:MSTRG.22528:MS…	znf596:Lox5a:Lox5b:barhl2-1:barhl2-2:nkx5-3:hinfp-1:hinfp-2:rest-1:zfp674:znf-1:znf91:znf333-1:znf652:zscan2-2:zscan2-6:rest-2:zfp560-1:zscan2-5:zscan2-8:zf-6:dbx:egr*-2:egr4-1:egr4-2:ets-3:emx1:etv4:elf1:fli-1:foxA(P):foxC1:foxC2:foxD1:foxD2:foxD3:foxG:foxL1:foxO:pou-p1:foxP:foxQ/D:foxJ1-1:foxJ1-2:foxJ1-3:foxJ1-4:foxJ1-5:foxN2/3-1:foxN2/3-2:foxN2/3-3:foxK1:foxK2:foxK3:gata123:gata456-3:gli-1:gli…	86
116	dd_Smes_g4_1	15564522	15565469	948	*	k27ac_pooled_april21_peak_925	4.63576	Distal Intergenic	1	15569179	15569515	337	1	MSTRG.596	MSTRG.596.1	-3710	0.363943	0.11978	-0.767208	-0.628897	0	0	0			GATB	glutamyl-tRNA amidotransferase subunit B [Source:HGNC Symbol;Acc:HGNC:8849]	-	-	0	MSTRG.7998:MSTRG.23420:SMESG000022963.1:MSTRG.4288:MSTRG.4289:MSTRG.22163:MSTRG.16827:MSTRG.9571:MSTRG.624:MSTRG.11386:MSTRG.22087:MSTRG.10044:MSTRG.5025:MSTRG.20458:MSTRG.2484:MSTRG.1218:MSTRG.9193:MSTRG.10604:MSTRG.11379:MSTRG.22994:MSTRG.4327:MSTRG.19528:MSTRG.2656:MSTRG.2731:MSTRG.23472:MSTRG.22528:MSTRG.19546:MSTRG.7741:MSTRG.3929:MSTRG.6819:MSTRG.11814:MSTRG.10087:MSTRG.20250:MSTRG.13758:MS…	Lox5a:Lox5b:barhl1:hinfp-1:hinfp-2:rest-1:zfp674:znf-1:znf91:znf333-1:znf652:zscan2-2:zscan2-6:rest-2:egr*-2:egr4-1:egr4-2:ets-3:ets-5:fli-2:fli-3:ets-1:etv4:elf1:fli-1:foxD1:foxD2:foxD3:foxG:foxL1:foxO:pou-p1:foxP:foxN(P):foxQ/D:foxJ1-1:foxJ1-2:foxJ1-3:foxJ1-4:foxJ1-5:foxN2/3-1:foxN2/3-2:foxN2/3-3:foxK1:foxK2:foxK3:gli-3:gata456-1:gata456-2:gata456-4:nkx6-2:Hox4b:nerfin2-1:isl-1:isl-2:atmin:zsca…	77
117	dd_Smes_g4_1	15566214	15566608	395	*	k27ac_pooled_april21_peak_926	3.05676	Distal Intergenic	1	15569179	15569515	337	1	MSTRG.596	MSTRG.596.1	-2571	0.363943	0.11978	-0.647707	-0.1275	0	0	0			GATB	glutamyl-tRNA amidotransferase subunit B [Source:HGNC Symbol;Acc:HGNC:8849]	-	-	0	MSTRG.7998:MSTRG.23420:MSTRG.21923:MSTRG.9638:SMESG000022963.1:MSTRG.4288:MSTRG.4289:MSTRG.22163:MSTRG.16827:MSTRG.9571:MSTRG.624:MSTRG.11386:MSTRG.22087:MSTRG.10044:MSTRG.5025:MSTRG.20458:MSTRG.19091:MSTRG.2484:MSTRG.1218:MSTRG.9193:MSTRG.22528:MSTRG.19546:MSTRG.7741:MSTRG.3929:MSTRG.6819:MSTRG.11814:MSTRG.13758:MSTRG.18815:MSTRG.21195:SMESG000072873.1:MSTRG.19883:MSTRG.3843:MSTRG.5337:MSTRG.148…	Lox5a:Lox5b:barhl2-1:barhl2-2:barhl1:hinfp-1:hinfp-2:rest-1:zfp674:znf-1:znf91:znf333-1:znf652:zscan2-2:zscan2-6:rest-2:coe:egr*-2:egr4-1:egr4-2:foxD1:foxD2:foxD3:foxG:foxL1:foxO:foxN(P):foxQ/D:foxJ1-1:foxJ1-2:foxJ1-3:foxJ1-4:foxJ1-5:foxN2/3-1:foxN2/3-2:foxN2/3-3:gata123:gata456-3:gli-3:gata456-1:gata456-2:gata456-4:nkx6-2:nerfin2-1:isl-1:isl-2:atmin:zscan2-4:cbt:klf-3:klf-1:lhx1-3:lhx3:meis-1:me…	71
118	dd_Smes_g4_1	15884845	15885116	272	*	k27ac_pooled_april21_peak_933	4.78426	Intron (MSTRG.611.1/MSTRG.611, intron 3 of 7)	1	15870325	15886405	16081	2	MSTRG.611	MSTRG.611.1	1289	50.6315	0.26605	-0.114679	-0.0686639	1	1	1	0.0459561	-0.268208	ADD1	adducin 1 [Source:HGNC Symbol;Acc:HGNC:243]	-	-	0	MSTRG.7896:MSTRG.7998:MSTRG.23420:MSTRG.21923:MSTRG.9638:SMESG000022963.1:MSTRG.12684:MSTRG.19544:MSTRG.4288:MSTRG.4289:MSTRG.22163:MSTRG.16827:MSTRG.9571:MSTRG.624:MSTRG.11386:MSTRG.22087:MSTRG.10044:MSTRG.5025:MSTRG.20458:MSTRG.2221:MSTRG.19091:MSTRG.2484:MSTRG.1218:MSTRG.9193:MSTRG.11379:MSTRG.22994:MSTRG.4327:MSTRG.19528:MSTRG.23472:MSTRG.10087:MSTRG.20250:MSTRG.20466:MSTRG.17923:MSTRG.22990:…	znf596:Lox5a:Lox5b:barhl2-1:barhl2-2:barhl1:nkx5-3:creb3l-1:hinfp-1:hinfp-2:rest-1:zfp674:znf-1:znf91:znf333-1:znf652:zscan2-2:zscan2-6:rest-2:dbx:coe:egr*-2:egr4-1:egr4-2:ets-5:fli-2:fli-3:ets-1:fli-1:pou-p1:foxP:gli-1:gli-2:gli-3:prdm14:nkx6-2:hnf4:Hox4b:nkx3-1:nkx5-2:nkx5-1:nerfin2-1:atmin:zscan2-4:cbt:klf-3:klf-1:egr-2:lhx1-3:musculin:nf-ya1:nf-ya2:nr4a-1:nr4a-2:onecut-1:onecut-2:onecut-3:one…	70
119	dd_Smes_g4_1	15908133	15908484	352	*	k27ac_pooled_april21_peak_935	14.1327	Distal Intergenic	1	15870331	15886405	16075	2	MSTRG.611	SMEST026208001.1	-21728	50.6315	0.26605	-0.293654	-0.48861	1	1	1	0.0459561	-0.268208	ADD1	adducin 1 [Source:HGNC Symbol;Acc:HGNC:243]	-	-	0	MSTRG.10887:MSTRG.7896:MSTRG.7998:MSTRG.23420:MSTRG.12684:MSTRG.19544:MSTRG.4288:MSTRG.4289:MSTRG.22163:MSTRG.16827:MSTRG.9571:MSTRG.624:MSTRG.11386:MSTRG.22087:MSTRG.10044:MSTRG.5025:MSTRG.2221:MSTRG.2484:MSTRG.1218:MSTRG.9193:MSTRG.5625:MSTRG.2171:MSTRG.22528:MSTRG.19546:MSTRG.7741:MSTRG.3929:MSTRG.6819:MSTRG.11814:MSTRG.10087:MSTRG.20250:MSTRG.13758:MSTRG.18815:MSTRG.21195:SMESG000072873.1:MST…	arnt-1:znf596:Lox5a:Lox5b:nkx5-3:creb3l-1:hinfp-1:hinfp-2:rest-1:zfp674:znf-1:znf91:znf333-1:znf652:zscan2-2:zscan2-6:dbx:egr*-2:egr4-1:egr4-2:foxC1:foxC2:foxD1:foxD2:foxD3:foxG:foxL1:foxO:pou-p1:foxP:foxN(P):foxQ/D:foxJ1-1:foxJ1-2:foxJ1-3:foxJ1-4:foxJ1-5:foxN2/3-1:foxN2/3-2:foxN2/3-3:foxK1:foxK2:foxK3:gcm-2:fezf2:gfi1:zfp541:zfhx3:prdm14:hesl-3:nkx6-2:hesl-2:nkx3-1:nkx5-2:nkx5-1:atmin:zscan2-4:k…	72
120	dd_Smes_g4_1	15990202	15990405	204	*	k27ac_pooled_april21_peak_942	5.11264	Intron (SMEST026219001.1/MSTRG.616, intron 7 of 18)	1	15974866	16000729	25864	2	MSTRG.616	MSTRG.616.3	10324	0.721129	0.221241	-0.161599	0.0527574	0	0	0	0.90164	-0.0881601	ENPEP	glutamyl aminopeptidase [Source:HGNC Symbol;Acc:HGNC:3355]	-	-	0	MSTRG.7896:MSTRG.7998:MSTRG.23420:SMESG000022963.1:MSTRG.1217:MSTRG.4483:MSTRG.17936:MSTRG.4288:MSTRG.4289:MSTRG.22163:MSTRG.16827:MSTRG.9571:MSTRG.624:MSTRG.11386:MSTRG.22087:MSTRG.10044:MSTRG.5025:MSTRG.20458:MSTRG.22126:SMESG000049970.1:SMESG000031904.1:MSTRG.221:MSTRG.19091:MSTRG.5081:MSTRG.5625:MSTRG.2171:MSTRG.18815:MSTRG.21195:SMESG000072873.1:MSTRG.19883:MSTRG.3843:MSTRG.5337:MSTRG.14880:…	znf596:Lox5a:Lox5b:barhl1:egr-5:znf362:zf-4:hinfp-1:hinfp-2:rest-1:zfp674:znf-1:znf91:znf333-1:znf652:zscan2-2:zscan2-6:rest-2:zfp560-1:zscan2-5:zscan2-8:zf-6:coe:emx1:foxC1:foxC2:foxQ/D:foxJ1-1:foxJ1-2:foxJ1-3:foxJ1-4:foxJ1-5:foxN2/3-1:foxN2/3-2:foxN2/3-3:gata123:gata456-3:gcm-2:gata456-1:gata456-2:gata456-4:nkx6-2:nkx3-1:nkx5-2:nerfin2-1:isl-1:isl-2:klf-3:lhx2-3:lhx1-3:meis-1:msx:mitfl-3:myoD:n…	62
121	dd_Smes_g4_1	16126615	16126816	202	*	k27ac_pooled_april21_peak_951	2.20259	Promoter	1	16127164	16184272	57109	1	MSTRG.621	MSTRG.621.1	-348	6.53923	0.109306	-0.0137338	0.142159	1	1	0	0.00430409	0.466715	SHB	SH2 domain containing adaptor protein B [Source:HGNC Symbol;Acc:HGNC:10838]	MSTRG.9479:MSTRG.16138:MSTRG.6445:MSTRG.11214:MSTRG.14130:MSTRG.3824:MSTRG.5349:MSTRG.6378:MSTRG.19902:MSTRG.18571:MSTRG.22605:MSTRG.12572:MSTRG.7450:MSTRG.5557:MSTRG.572:MSTRG.18286:MSTRG.5364:MSTRG.18607:MSTRG.17449:MSTRG.15548:MSTRG.22352:MSTRG.2646	foxA(P):prdm14:musculin:myoD:nf-ya1:nf-ya2:znf181:zbtb24:ski-1:ap4-1:mitfl-2:ptf-5:irx-1:irx6-1:irx6-2:irx6-3:hb-1:hb-2:znf180:zscan2-3:pou2/3-1:pou2/3-2	13	MSTRG.10887:MSTRG.7896:MSTRG.1217:MSTRG.4483:MSTRG.17936:MSTRG.19544:MSTRG.2221:MSTRG.2484:MSTRG.1218:MSTRG.9193:MSTRG.5625:MSTRG.2171:MSTRG.22528:MSTRG.19546:MSTRG.7741:MSTRG.3929:MSTRG.6819:MSTRG.11814:MSTRG.10087:MSTRG.20250:MSTRG.18815:MSTRG.21195:SMESG000072873.1:MSTRG.19883:MSTRG.3843:MSTRG.5337:MSTRG.14880:MSTRG.5693:MSTRG.10837:MSTRG.18451:MSTRG.12975:MSTRG.17474:MSTRG.22990:MSTRG.3741:MS…	arnt-1:znf596:egr-5:znf362:zf-4:creb3l-1:dbx:egr*-2:egr4-1:egr4-2:foxC1:foxC2:foxD1:foxD2:foxD3:foxG:foxL1:foxO:pou-p1:foxP:foxQ/D:foxJ1-1:foxJ1-2:foxJ1-3:foxJ1-4:foxJ1-5:foxN2/3-1:foxN2/3-2:foxN2/3-3:foxK1:foxK2:foxK3:gli-3:hesl-3:hnf4:hesl-2:nkx3-1:nkx5-2:nkx5-1:nerfin2-1:egr-2:lhx1-3:meis-1:sall4:fir1:zfp-8:zfp236-1:zfp354:znf101:znf425:znf660:lmpt-3:smad1:smad9:mitfl-3:nkx2l-1:onecut-1:onecut…	51
122	dd_Smes_g4_1	16127084	16127338	255	*	k27ac_pooled_april21_peak_951	2.20259	Promoter	1	16127164	16184272	57109	1	MSTRG.621	MSTRG.621.1	0	6.53923	0.109306	-0.0137338	0.142159	1	1	0	0.00430409	0.466715	SHB	SH2 domain containing adaptor protein B [Source:HGNC Symbol;Acc:HGNC:10838]	MSTRG.1217:MSTRG.4483:MSTRG.17936:MSTRG.2484:MSTRG.1218:MSTRG.9193:MSTRG.10087:MSTRG.20250:MSTRG.16138:MSTRG.17155:SMESG000049967.1:MSTRG.10215:MSTRG.15979:MSTRG.6445:MSTRG.11214:MSTRG.14130:MSTRG.3824:MSTRG.5349:MSTRG.6378:MSTRG.19902:MSTRG.5260:MSTRG.23512:MSTRG.9977:MSTRG.7606:MSTRG.396:MSTRG.15425:MSTRG.19918:MSTRG.18571:MSTRG.12572:MSTRG.7450:MSTRG.5557:MSTRG.572:MSTRG.18286:MSTRG.17449:MSTR…	egr-5:znf362:zf-4:egr*-2:egr4-1:egr4-2:pou-p1:foxP:prdm14:atmin:zscan2-4:cbt:klf-1:musculin:myoD:nf-ya1:nf-ya2:znf181:zbtb24:ski-1:ctcf:zfp-10:zfp677:sp5:klf-2:sp6-9:sp8:ap4-1:ptf-5:irx-1:irx6-1:irx6-2:irx6-3:znf180:zscan2-3:pou2/3-1:pou2/3-2	20	MSTRG.10887:MSTRG.7896:MSTRG.19544:MSTRG.2221:MSTRG.9479:MSTRG.5625:MSTRG.2171:MSTRG.22528:MSTRG.19546:MSTRG.7741:MSTRG.3929:MSTRG.6819:MSTRG.11814:MSTRG.18815:MSTRG.21195:SMESG000072873.1:MSTRG.19883:MSTRG.3843:MSTRG.5337:MSTRG.14880:MSTRG.5693:MSTRG.10837:MSTRG.18451:MSTRG.12975:MSTRG.17474:MSTRG.22990:MSTRG.3741:MSTRG.4403:MSTRG.13843:MSTRG.19305:MSTRG.7792:MSTRG.6856:MSTRG.10592:MSTRG.12851:M…	arnt-1:znf596:creb3l-1:dbx:foxA(P):foxC1:foxC2:foxD1:foxD2:foxD3:foxG:foxL1:foxO:foxQ/D:foxJ1-1:foxJ1-2:foxJ1-3:foxJ1-4:foxJ1-5:foxN2/3-1:foxN2/3-2:foxN2/3-3:foxK1:foxK2:foxK3:gli-3:hesl-3:hnf4:Hox4b:hesl-2:nkx3-1:nkx5-2:nkx5-1:nerfin2-1:lhx1-3:meis-1:sall4:fir1:zfp-8:zfp236-1:zfp354:znf101:znf425:znf660:lmpt-3:smad1:smad9:mitfl-3:nkx2l-1:onecut-1:onecut-2:onecut-3:onecut-5:hnf6:cux-2:pax2/5/8-1:…	53
123	dd_Smes_g4_1	16181833	16182626	794	*	k27ac_pooled_april21_peak_954	2.94004	Intron (MSTRG.621.1/MSTRG.621, intron 7 of 7)	1	16198215	16204998	6784	1	MSTRG.622	MSTRG.622.1	-15589	62.5464	0.216761	-0.65831	-0.417868	0	0	0	0.434548	0.163238	TMED2	transmembrane p24 trafficking protein 2 [Source:HGNC Symbol;Acc:HGNC:16996]	-	-	0	MSTRG.7896:MSTRG.7998:MSTRG.23420:MSTRG.23513:SMESG000022963.1:MSTRG.12684:MSTRG.4288:MSTRG.4289:MSTRG.22163:MSTRG.16827:MSTRG.9571:MSTRG.624:MSTRG.11386:MSTRG.22087:MSTRG.10044:MSTRG.5025:MSTRG.20458:MSTRG.14008:MSTRG.2484:MSTRG.1218:MSTRG.9193:MSTRG.5081:MSTRG.20466:MSTRG.17923:MSTRG.23304:MSTRG.8862:MSTRG.5535:MSTRG.17691:MSTRG.7287:MSTRG.19305:MSTRG.17155:SMESG000049967.1:MSTRG.10215:MSTRG.10…	znf596:Lox5a:Lox5b:e22/23:barhl1:nkx5-3:hinfp-1:hinfp-2:rest-1:zfp674:znf-1:znf91:znf333-1:znf652:zscan2-2:zscan2-6:rest-2:dll-1:egr*-2:egr4-1:egr4-2:emx1:gli-1:gli-2:fezf2:gfi1:zfp541:zfhx3:nkx6-2:hesl-2:atmin:zscan2-4:cbt:klf-3:klf-1:lhx2-1:lhx2-4:lhx2-3:lmx1-1:lhx1-3:meis-1:meox:msx:sall4:fir1:zfp-8:zfp236-1:zfp354:znf101:znf425:znf660:lmpt-3:smad1:smad9:mitfl-3:myoD:neuroD-1:fer3l-3:nf-ya1:nf…	60
124	dd_Smes_g4_1	16264884	16265224	341	*	k27ac_pooled_april21_peak_961	7.68082	Promoter	1	16216609	16264189	47581	2	MSTRG.624	SMEST026243001.1	-695	13.222	0.205674	0.00703057	-0.235371	0	0	0	0.981738	-0.00737706	ZNF91	zinc finger protein 91 [Source:HGNC Symbol;Acc:HGNC:13166]	-	-	0	MSTRG.7896:MSTRG.7998:MSTRG.23420:MSTRG.1217:MSTRG.4483:MSTRG.17936:MSTRG.4288:MSTRG.4289:MSTRG.22163:MSTRG.16827:MSTRG.9571:MSTRG.624:MSTRG.11386:MSTRG.22087:MSTRG.10044:MSTRG.5025:MSTRG.2221:MSTRG.2484:MSTRG.1218:MSTRG.9193:MSTRG.22528:MSTRG.19546:MSTRG.7741:MSTRG.22295:MSTRG.19765:MSTRG.3929:MSTRG.6819:MSTRG.11814:MSTRG.10087:MSTRG.20250:MSTRG.13758:MSTRG.18815:MSTRG.21195:SMESG000072873.1:MST…	znf596:Lox5a:Lox5b:egr-5:znf362:zf-4:hinfp-1:hinfp-2:rest-1:zfp674:znf-1:znf91:znf333-1:znf652:zscan2-2:zscan2-6:dbx:egr*-2:egr4-1:egr4-2:foxD1:foxD2:foxD3:foxF1 :foxF2:foxG:foxL1:foxO:pou-p1:foxP:foxN(P):foxQ/D:foxJ1-1:foxJ1-2:foxJ1-3:foxJ1-4:foxJ1-5:foxN2/3-1:foxN2/3-2:foxN2/3-3:gcm-2:gli-3:prdm14:nkx6-2:hnf4:Hox4b:hesl-2:atmin:zscan2-4:cbt:klf-3:klf-1:lhx1-3:Mef2-1:gtf2a1:Mef2-2:musculin:sall4…	65
125	dd_Smes_g4_1	17074943	17075221	279	*	k27ac_pooled_april21_peak_1015	3.86507	Intron (SMEST026362002.1/SMESG000026362.1, intron 1 of 5)	1	17073911	17084906	10996	1	SMESG000026362.1	SMEST026362002.1	1032	0.0781308	0.236521	-0.331963	-0.0538966	0	0	0	0.0796902	0.991849	TCAF2	TRPM8 channel associated factor 2 [Source:HGNC Symbol;Acc:HGNC:26878]	-	-	0	MSTRG.10887:MSTRG.7998:MSTRG.23420:MSTRG.21923:MSTRG.9638:MSTRG.10410:SMESG000022963.1:MSTRG.12684:MSTRG.19544:MSTRG.4288:MSTRG.4289:MSTRG.22163:MSTRG.16827:MSTRG.9571:MSTRG.624:MSTRG.11386:MSTRG.22087:MSTRG.10044:MSTRG.5025:MSTRG.20458:MSTRG.2221:MSTRG.14008:MSTRG.19091:MSTRG.2484:MSTRG.1218:MSTRG.9193:MSTRG.10604:MSTRG.11379:MSTRG.22994:MSTRG.4327:MSTRG.19528:MSTRG.2656:MSTRG.2731:MSTRG.23472:M…	arnt-1:Lox5a:Lox5b:barhl2-1:barhl2-2:bsx:barhl1:nkx5-3:creb3l-1:hinfp-1:hinfp-2:rest-1:zfp674:znf-1:znf91:znf333-1:znf652:zscan2-2:zscan2-6:rest-2:dbx:dll-1:coe:egr*-2:egr4-1:egr4-2:ets-3:ets-5:fli-2:fli-3:ets-1:etv4:elf1:fli-1:gcm-2:gli-1:gli-2:gli-3:gata456-1:gata456-2:gata456-4:fezf2:gfi1:zfp541:zfhx3:prdm14:hesl-3:nkx6-2:Hox4b:hesl-2:nkx3-1:nkx5-2:nkx5-1:nerfin2-1:isl-1:isl-2:atmin:zscan2-4:c…	95
126	dd_Smes_g4_1	17549262	17549556	295	*	k27ac_pooled_april21_peak_1032	7.86139	Promoter	1	17548526	17578046	29521	1	MSTRG.670	MSTRG.670.8	736	19.6783	0.315344	0.330305	-0.0245123	0	0	0	0.714158	0.0914339	ESYT2	extended synaptotagmin 2 [Source:HGNC Symbol;Acc:HGNC:22211]	-	-	0	MSTRG.7896:MSTRG.7998:MSTRG.23420:MSTRG.1217:MSTRG.4483:MSTRG.17936:MSTRG.5414:MSTRG.2221:MSTRG.14008:MSTRG.2484:MSTRG.1218:MSTRG.9193:MSTRG.10604:MSTRG.5081:MSTRG.22528:MSTRG.19546:MSTRG.7741:MSTRG.22295:MSTRG.19765:MSTRG.3929:MSTRG.6819:MSTRG.11814:MSTRG.13758:MSTRG.18815:MSTRG.21195:SMESG000072873.1:MSTRG.19883:MSTRG.3843:MSTRG.5337:MSTRG.14880:MSTRG.5693:MSTRG.10837:MSTRG.18451:MSTRG.12975:MS…	znf596:Lox5a:Lox5b:egr-5:znf362:zf-4:tlx-1:dbx:dll-1:egr*-2:egr4-1:egr4-2:ets-3:emx1:foxD1:foxD2:foxD3:foxF1 :foxF2:foxG:foxL1:foxO:foxN(P):foxQ/D:foxJ1-1:foxJ1-2:foxJ1-3:foxJ1-4:foxJ1-5:foxN2/3-1:foxN2/3-2:foxN2/3-3:foxK1:foxK2:foxK3:gata123:gata456-3:gata456-1:gata456-2:gata456-4:fezf2:gfi1:zfp541:zfhx3:prdm14:nkx6-2:hnf4:Hox4b:nkx3-1:nkx5-2:nkx5-1:Hox1:Hox4a:nerfin2-1:lbx:lhx2-1:lhx2-4:lhx1-3:…	65
127	dd_Smes_g4_1	17560203	17560882	680	*	k27ac_pooled_april21_peak_1033	3.17426	Intron (SMEST026412001.1/MSTRG.670, intron 7 of 20)	1	17563258	17573182	9925	1	MSTRG.670	MSTRG.670.17	-2376	19.6783	0.315344	-0.555896	-0.62066	0	0	0	0.714158	0.0914339	ESYT2	extended synaptotagmin 2 [Source:HGNC Symbol;Acc:HGNC:22211]	-	-	0	MSTRG.7998:MSTRG.23420:MSTRG.11379:MSTRG.22994:MSTRG.4327:MSTRG.19528:MSTRG.23472:MSTRG.22528:MSTRG.19546:MSTRG.7741:MSTRG.3929:MSTRG.6819:MSTRG.11814:MSTRG.10087:MSTRG.20250:MSTRG.13758:MSTRG.18815:MSTRG.21195:SMESG000072873.1:MSTRG.19883:MSTRG.3843:MSTRG.5337:MSTRG.14880:MSTRG.5693:MSTRG.10837:MSTRG.18451:MSTRG.12975:MSTRG.17474:MSTRG.23309:MSTRG.9120:MSTRG.23304:MSTRG.8862:MSTRG.5535:MSTRG.176…	Lox5a:Lox5b:ets-5:fli-2:fli-3:ets-1:fli-1:foxD1:foxD2:foxD3:foxG:foxL1:foxO:pou-p1:foxP:foxN(P):foxQ/D:foxJ1-1:foxJ1-2:foxJ1-3:foxJ1-4:foxJ1-5:foxN2/3-1:foxN2/3-2:foxN2/3-3:foxK1:foxK2:foxK3:gata123:gata456-3:fezf2:gfi1:zfp541:zfhx3:nkx6-2:nkx3-1:nkx5-2:nkx5-1:atmin:zscan2-4:lhx1-3:Mef2-1:gtf2a1:musculin:mitfl-3:nf-ya1:nf-ya2:nr2f1:nr4a-1:nr4a-2:onecut-1:onecut-2:onecut-3:onecut-5:hnf6:cux-2:pax6…	47
128	dd_Smes_g4_1	17601172	17601609	438	*	k27ac_pooled_april21_peak_1034	2.64856	Promoter	1	17601156	17604640	3485	1	MSTRG.671	MSTRG.671.7	16	7.15511	0.137414	-0.202063	0.0220924	1	1	0	0.0246375	0.452043	APLNR	apelin receptor [Source:HGNC Symbol;Acc:HGNC:339]	-	-	0	MSTRG.10887:MSTRG.2221:MSTRG.2484:MSTRG.1218:MSTRG.9193:MSTRG.9479:MSTRG.5625:MSTRG.2171:MSTRG.22528:MSTRG.19546:MSTRG.7741:MSTRG.3929:MSTRG.6819:MSTRG.11814:MSTRG.18815:MSTRG.21195:SMESG000072873.1:MSTRG.19883:MSTRG.3843:MSTRG.5337:MSTRG.14880:MSTRG.5693:MSTRG.10837:MSTRG.18451:MSTRG.12975:MSTRG.17474:MSTRG.23309:MSTRG.9120:MSTRG.20466:MSTRG.17923:MSTRG.12700:MSTRG.8018:MSTRG.11935:MSTRG.23304:M…	arnt-1:dbx:egr*-2:egr4-1:egr4-2:foxA(P):foxC1:foxC2:foxD1:foxD2:foxD3:foxG:foxL1:foxO:foxQ/D:foxJ1-1:foxJ1-2:foxJ1-3:foxJ1-4:foxJ1-5:foxN2/3-1:foxN2/3-2:foxN2/3-3:foxK1:foxK2:foxK3:gata123:gata456-3:gli-1:gli-2:gata456-1:gata456-2:gata456-4:fezf2:gfi1:zfp541:zfhx3:prdm14:hesl-3:hnf4:hesl-2:isl-1:isl-2:atmin:zscan2-4:cbt:egr-2:lhx1-3:meis-1:mlx:myoD:a:nkx3-2:nr2f1:nr4a-1:nr4a-2:otx-1:otx-2:pax2/5/…	57
129	dd_Smes_g4_1	17601172	17601609	438	*	k27ac_pooled_april21_peak_1035	8.16831	Promoter	1	17601156	17604640	3485	1	MSTRG.671	MSTRG.671.7	16	7.15511	0.137414	-0.202063	0.0220924	1	1	0	0.0246375	0.452043	APLNR	apelin receptor [Source:HGNC Symbol;Acc:HGNC:339]	-	-	0	MSTRG.10887:MSTRG.2221:MSTRG.2484:MSTRG.1218:MSTRG.9193:MSTRG.9479:MSTRG.5625:MSTRG.2171:MSTRG.22528:MSTRG.19546:MSTRG.7741:MSTRG.3929:MSTRG.6819:MSTRG.11814:MSTRG.18815:MSTRG.21195:SMESG000072873.1:MSTRG.19883:MSTRG.3843:MSTRG.5337:MSTRG.14880:MSTRG.5693:MSTRG.10837:MSTRG.18451:MSTRG.12975:MSTRG.17474:MSTRG.23309:MSTRG.9120:MSTRG.20466:MSTRG.17923:MSTRG.12700:MSTRG.8018:MSTRG.11935:MSTRG.23304:M…	arnt-1:dbx:egr*-2:egr4-1:egr4-2:foxA(P):foxC1:foxC2:foxD1:foxD2:foxD3:foxG:foxL1:foxO:foxQ/D:foxJ1-1:foxJ1-2:foxJ1-3:foxJ1-4:foxJ1-5:foxN2/3-1:foxN2/3-2:foxN2/3-3:foxK1:foxK2:foxK3:gata123:gata456-3:gli-1:gli-2:gata456-1:gata456-2:gata456-4:fezf2:gfi1:zfp541:zfhx3:prdm14:hesl-3:hnf4:hesl-2:isl-1:isl-2:atmin:zscan2-4:cbt:egr-2:lhx1-3:meis-1:mlx:myoD:a:nkx3-2:nr2f1:nr4a-1:nr4a-2:otx-1:otx-2:pax2/5/…	57
130	dd_Smes_g4_1	17601512	17601609	98	*	k27ac_pooled_april21_peak_1036	5.9673	Promoter	1	17601156	17604640	3485	1	MSTRG.671	MSTRG.671.7	356	7.15511	0.137414	-0.00756439	0.0120819	1	1	0	0.0246375	0.452043	APLNR	apelin receptor [Source:HGNC Symbol;Acc:HGNC:339]	-	-	0	MSTRG.10887:MSTRG.10410:MSTRG.2221:MSTRG.2484:MSTRG.1218:MSTRG.9193:MSTRG.9479:MSTRG.5625:MSTRG.2171:MSTRG.22528:MSTRG.19546:MSTRG.7741:MSTRG.22295:MSTRG.19765:MSTRG.3929:MSTRG.6819:MSTRG.11814:MSTRG.18815:MSTRG.21195:SMESG000072873.1:MSTRG.19883:MSTRG.3843:MSTRG.5337:MSTRG.14880:MSTRG.5693:MSTRG.10837:MSTRG.18451:MSTRG.12975:MSTRG.17474:MSTRG.23309:MSTRG.9120:MSTRG.20466:MSTRG.17923:MSTRG.12700:…	arnt-1:bsx:dbx:egr*-2:egr4-1:egr4-2:foxA(P):foxC1:foxC2:foxD1:foxD2:foxD3:foxF1 :foxF2:foxG:foxL1:foxO:foxQ/D:foxJ1-1:foxJ1-2:foxJ1-3:foxJ1-4:foxJ1-5:foxN2/3-1:foxN2/3-2:foxN2/3-3:foxK1:foxK2:foxK3:gata123:gata456-3:gli-1:gli-2:gata456-1:gata456-2:gata456-4:fezf2:gfi1:zfp541:zfhx3:prdm14:hesl-3:hnf4:hesl-2:isl-1:isl-2:atmin:zscan2-4:cbt:klf-1:egr-2:lhx1-3:meis-1:mlx:myoD:nf-ya1:nf-ya2:a:nkx3-2:nr…	66
131	dd_Smes_g4_10	206426	206862	437	*	k27ac_pooled_april21_peak_1053	4.75294	Promoter	2	206407	228350	21944	1	MSTRG.691	MSTRG.691.7	19	10.0281	0.214263	-0.224348	-0.32988	0	0	0	0.854972	-0.0532202	SNX13	sorting nexin 13 [Source:HGNC Symbol;Acc:HGNC:21335]	MSTRG.14619:MSTRG.7450:MSTRG.5557:MSTRG.572:MSTRG.18286	zfp-7:irx-1:irx6-1:irx6-2:irx6-3	2	MSTRG.7896:MSTRG.7998:MSTRG.23420:MSTRG.20458:MSTRG.2221:MSTRG.2484:MSTRG.1218:MSTRG.9193:MSTRG.9479:MSTRG.5625:MSTRG.2171:MSTRG.10087:MSTRG.20250:MSTRG.13758:MSTRG.11405:MSTRG.20466:MSTRG.17923:MSTRG.23304:MSTRG.8862:MSTRG.5535:MSTRG.17691:MSTRG.16138:MSTRG.7287:MSTRG.4403:MSTRG.7792:MSTRG.6856:MSTRG.10592:MSTRG.12851:MSTRG.17848:MSTRG.9911:MSTRG.17155:SMESG000049967.1:MSTRG.2271:MSTRG.1469:MSTR…	znf596:Lox5a:Lox5b:rest-2:dbx:egr*-2:egr4-1:egr4-2:foxA(P):foxC1:foxC2:pou-p1:foxP:foxN(P):gcm-2:gli-1:gli-2:fezf2:gfi1:zfp541:zfhx3:prdm14:nkx6-2:hnf4:nkx3-1:nkx5-2:nkx5-1:nerfin2-1:isl-1:isl-2:atmin:zscan2-4:egr-2:lhx2-3:lhx1-3:lhx3:meis-1:musculin:msx:sall4:fir1:zfp-8:zfp236-1:zfp354:znf101:znf425:znf660:lmpt-3:smad1:smad9:nf-ya1:nf-ya2:nr-1:nr2e1:tlx-2:pax2/5/8-1:pax6-1:pax6-2:Xfin:zfp-4:zbed…	61
132	dd_Smes_g4_10	285607	286069	463	*	k27ac_pooled_april21_peak_1054	4.00864	Promoter	2	278973	285608	6636	2	MSTRG.690	MSTRG.690.1	0	47.5701	0.362127	0.0906827	0.011449	1	0	0	0.0399197	0.288269	LCK	LCK proto-oncogene, Src family tyrosine kinase [Source:HGNC Symbol;Acc:HGNC:6524]	-	-	0	MSTRG.9597:MSTRG.6974:MSTRG.7998:MSTRG.23420:MSTRG.12684:MSTRG.4288:MSTRG.4289:MSTRG.22163:MSTRG.16827:MSTRG.9571:MSTRG.624:MSTRG.11386:MSTRG.22087:MSTRG.10044:MSTRG.5025:MSTRG.20458:MSTRG.2221:MSTRG.19091:MSTRG.2484:MSTRG.1218:MSTRG.9193:MSTRG.11379:MSTRG.22994:MSTRG.4327:MSTRG.19528:MSTRG.23472:MSTRG.22990:MSTRG.7287:MSTRG.4403:MSTRG.7792:MSTRG.6856:MSTRG.10592:MSTRG.23578:MSTRG.20904:MSTRG.128…	pax3/7-1:alx3-2:Lox5a:Lox5b:nkx5-3:hinfp-1:hinfp-2:rest-1:zfp674:znf-1:znf91:znf333-1:znf652:zscan2-2:zscan2-6:rest-2:dbx:coe:egr*-2:egr4-1:egr4-2:ets-5:fli-2:fli-3:ets-1:fli-1:gli-3:nkx6-2:hnf4:nkx3-1:nkx5-2:nkx5-1:Hox1:Hox4a:nerfin2-1:egr-2:lbx:lhx1-3:lhx3:meis-1:sall4:fir1:zfp-8:zfp236-1:zfp354:znf101:znf425:znf660:lmpt-3:smad1:smad9:mitfl-3:myoD:neuroD-1:fer3l-3:neuroD-2:olig:onecut-1:onecut-…	60
133	dd_Smes_g4_10	577085	577515	431	*	k27ac_pooled_april21_peak_1070	4.22618	Promoter	2	578080	582117	4038	1	MSTRG.697	MSTRG.697.2	-565	0.282772	0.163402	-0.382016	-0.768194	0	0	0			MSX1	msh homeobox 1 [Source:HGNC Symbol;Acc:HGNC:7391]	MSTRG.14619:MSTRG.11197:MSTRG.22732:MSTRG.308:MSTRG.1201:MSTRG.8933	zfp-7:egr-1:ovo-1:prdm13:gl:znf341	2	MSTRG.7896:MSTRG.7998:MSTRG.23420:MSTRG.10410:SMESG000022963.1:MSTRG.12684:MSTRG.19544:MSTRG.4288:MSTRG.4289:MSTRG.22163:MSTRG.16827:MSTRG.9571:MSTRG.624:MSTRG.11386:MSTRG.22087:MSTRG.10044:MSTRG.5025:MSTRG.20458:MSTRG.22126:SMESG000049970.1:SMESG000031904.1:MSTRG.221:MSTRG.2221:MSTRG.19091:MSTRG.2484:MSTRG.1218:MSTRG.9193:MSTRG.5081:MSTRG.19528:MSTRG.11405:MSTRG.20466:MSTRG.17923:MSTRG.23304:MST…	znf596:Lox5a:Lox5b:bsx:barhl1:nkx5-3:creb3l-1:hinfp-1:hinfp-2:rest-1:zfp674:znf-1:znf91:znf333-1:znf652:zscan2-2:zscan2-6:rest-2:zfp560-1:zscan2-5:zscan2-8:zf-6:dbx:coe:egr*-2:egr4-1:egr4-2:emx1:ets-1:gcm-2:gli-1:gli-2:fezf2:gfi1:zfp541:zfhx3:prdm14:hesl-3:nkx6-2:hnf4:hesl-2:isl-1:isl-2:atmin:zscan2-4:cbt:klf-3:klf-1:lbx:lhx2-3:lhx1-3:lhx3:Mef2-1:gtf2a1:Mef2-2:musculin:smad1:smad9:myoD:nf-ya1:nf-…	80
134	dd_Smes_g4_10	577085	577515	431	*	k27ac_pooled_april21_peak_1071	3.9851	Promoter	2	578080	582117	4038	1	MSTRG.697	MSTRG.697.2	-565	0.282772	0.163402	-0.382016	-0.768194	0	0	0			MSX1	msh homeobox 1 [Source:HGNC Symbol;Acc:HGNC:7391]	MSTRG.14619:MSTRG.11197:MSTRG.22732:MSTRG.308:MSTRG.1201:MSTRG.8933	zfp-7:egr-1:ovo-1:prdm13:gl:znf341	2	MSTRG.7896:MSTRG.7998:MSTRG.23420:MSTRG.10410:SMESG000022963.1:MSTRG.12684:MSTRG.19544:MSTRG.4288:MSTRG.4289:MSTRG.22163:MSTRG.16827:MSTRG.9571:MSTRG.624:MSTRG.11386:MSTRG.22087:MSTRG.10044:MSTRG.5025:MSTRG.20458:MSTRG.22126:SMESG000049970.1:SMESG000031904.1:MSTRG.221:MSTRG.2221:MSTRG.19091:MSTRG.2484:MSTRG.1218:MSTRG.9193:MSTRG.5081:MSTRG.19528:MSTRG.11405:MSTRG.20466:MSTRG.17923:MSTRG.23304:MST…	znf596:Lox5a:Lox5b:bsx:barhl1:nkx5-3:creb3l-1:hinfp-1:hinfp-2:rest-1:zfp674:znf-1:znf91:znf333-1:znf652:zscan2-2:zscan2-6:rest-2:zfp560-1:zscan2-5:zscan2-8:zf-6:dbx:coe:egr*-2:egr4-1:egr4-2:emx1:ets-1:gcm-2:gli-1:gli-2:fezf2:gfi1:zfp541:zfhx3:prdm14:hesl-3:nkx6-2:hnf4:hesl-2:isl-1:isl-2:atmin:zscan2-4:cbt:klf-3:klf-1:lbx:lhx2-3:lhx1-3:lhx3:Mef2-1:gtf2a1:Mef2-2:musculin:smad1:smad9:myoD:nf-ya1:nf-…	80
135	dd_Smes_g4_10	577740	577985	246	*	k27ac_pooled_april21_peak_1071	3.9851	Promoter	2	578080	582117	4038	1	MSTRG.697	MSTRG.697.2	-95	0.282772	0.163402	-0.382016	-0.768194	0	0	0			MSX1	msh homeobox 1 [Source:HGNC Symbol;Acc:HGNC:7391]	MSTRG.14619:MSTRG.11197:MSTRG.22732:MSTRG.308:MSTRG.1201:MSTRG.8933	zfp-7:egr-1:ovo-1:prdm13:gl:znf341	2	MSTRG.7896:MSTRG.7998:MSTRG.23420:MSTRG.21923:MSTRG.9638:MSTRG.10410:SMESG000022963.1:MSTRG.5414:MSTRG.12684:MSTRG.19544:MSTRG.4288:MSTRG.4289:MSTRG.22163:MSTRG.16827:MSTRG.9571:MSTRG.624:MSTRG.11386:MSTRG.22087:MSTRG.10044:MSTRG.5025:MSTRG.20458:MSTRG.19091:MSTRG.2484:MSTRG.1218:MSTRG.9193:MSTRG.5081:MSTRG.5625:MSTRG.2171:MSTRG.13758:MSTRG.11405:MSTRG.20466:MSTRG.17923:MSTRG.23304:MSTRG.8862:MST…	znf596:Lox5a:Lox5b:barhl2-1:barhl2-2:bsx:barhl1:tlx-1:nkx5-3:creb3l-1:hinfp-1:hinfp-2:rest-1:zfp674:znf-1:znf91:znf333-1:znf652:zscan2-2:zscan2-6:rest-2:coe:egr*-2:egr4-1:egr4-2:emx1:foxC1:foxC2:foxN(P):gcm-2:gli-1:gli-2:fezf2:gfi1:zfp541:zfhx3:prdm14:hesl-3:nkx6-2:Hox4b:hesl-2:nerfin2-1:isl-1:isl-2:atmin:zscan2-4:cbt:klf-3:klf-1:lbx:lhx2-3:lhx1-3:lhx3:meis-1:musculin:smad1:smad9:myoD:nf-ya1:nf-y…	78
136	dd_Smes_g4_10	577991	578199	209	*	k27ac_pooled_april21_peak_1072	4.93787	Promoter	2	578080	582117	4038	1	MSTRG.697	MSTRG.697.2	0	0.282772	0.163402	-0.427408	-0.591055	0	0	0			MSX1	msh homeobox 1 [Source:HGNC Symbol;Acc:HGNC:7391]	MSTRG.14619:MSTRG.11197:MSTRG.22732:MSTRG.308:MSTRG.1201:MSTRG.8933	zfp-7:egr-1:ovo-1:prdm13:gl:znf341	2	MSTRG.7896:MSTRG.7998:MSTRG.23420:MSTRG.21923:MSTRG.9638:MSTRG.10410:SMESG000022963.1:MSTRG.5414:MSTRG.12684:MSTRG.19544:MSTRG.4288:MSTRG.4289:MSTRG.22163:MSTRG.16827:MSTRG.9571:MSTRG.624:MSTRG.11386:MSTRG.22087:MSTRG.10044:MSTRG.5025:MSTRG.20458:MSTRG.19091:MSTRG.2484:MSTRG.1218:MSTRG.9193:MSTRG.5081:MSTRG.5625:MSTRG.2171:MSTRG.13758:MSTRG.23309:MSTRG.9120:MSTRG.11405:MSTRG.20466:MSTRG.17923:MST…	znf596:Lox5a:Lox5b:barhl2-1:barhl2-2:bsx:barhl1:tlx-1:nkx5-3:creb3l-1:hinfp-1:hinfp-2:rest-1:zfp674:znf-1:znf91:znf333-1:znf652:zscan2-2:zscan2-6:rest-2:coe:egr*-2:egr4-1:egr4-2:emx1:foxC1:foxC2:foxN(P):gata123:gata456-3:gcm-2:gli-1:gli-2:gata456-1:gata456-2:gata456-4:fezf2:gfi1:zfp541:zfhx3:prdm14:hesl-3:nkx6-2:Hox4b:hesl-2:nerfin2-1:isl-1:isl-2:atmin:zscan2-4:cbt:klf-3:klf-1:lbx:lhx2-3:lhx1-3:l…	80
137	dd_Smes_g4_10	964256	964968	713	*	k27ac_pooled_april21_peak_1099	15.8321	Promoter	2	964075	964538	464	2	MSTRG.705	MSTRG.705.1	0	2.49755	0.331358	-0.277564	-0.506925	0	0	0			-	-	MSTRG.10887:MSTRG.7998:MSTRG.23420:MSTRG.4288:MSTRG.4289:MSTRG.22163:MSTRG.16827:MSTRG.9571:MSTRG.624:MSTRG.11386:MSTRG.22087:MSTRG.10044:MSTRG.5025:MSTRG.3741:MSTRG.7287:MSTRG.19305:MSTRG.12851:MSTRG.1469:MSTRG.2717:MSTRG.14130:MSTRG.3824:MSTRG.764:MSTRG.2111:MSTRG.3565:MSTRG.7049:MSTRG.19418:MSTRG.20936:a:MSTRG.9027:MSTRG.9898:MSTRG.22489:MSTRG.17678:MSTRG.10086:MSTRG.18571:MSTRG.22605:MSTRG.46…	arnt-1:Lox5a:Lox5b:hinfp-1:hinfp-2:rest-1:zfp674:znf-1:znf91:znf333-1:znf652:zscan2-2:zscan2-6:hesl-3:nkx6-2:hesl-2:nerfin2-1:lhx2-3:mitfl-3:nf-ya1:nf-ya2:nkx6-1:pax2/5/8-1:Xfin:zfp-4:zbed-1:zf-5:a:scratch-like:smad4-1:snail-1:snail-2:da:ap4-1:mitfl-2:zeb-1:prdm15:zfp112:zfp408:znf486:Lox4:irx-1:irx6-1:irx6-2:irx6-3:znf180:zscan2-3:twist	26	MSTRG.10887:MSTRG.23513:MSTRG.1217:MSTRG.4483:MSTRG.17936:MSTRG.12684:MSTRG.2221:MSTRG.14008:MSTRG.10604:MSTRG.2731:MSTRG.13758:MSTRG.4403:MSTRG.13843:MSTRG.7792:MSTRG.6856:MSTRG.10592:MSTRG.7427:MSTRG.20979:MSTRG.2947:MSTRG.6445:MSTRG.8925:MSTRG.4330:MSTRG.14931:MSTRG.12358:MSTRG.19417:MSTRG.432:MSTRG.21315:MSTRG.6529:MSTRG.3802:MSTRG.11214:MSTRG.19581:MSTRG.18805:MSTRG.6003:MSTRG.22726:MSTRG.17…	arnt-1:e22/23:egr-5:znf362:zf-4:nkx5-3:dbx:dll-1:ets-3:elf1:foxN(P):hnf4:Hox4b:nkx3-1:nkx5-2:nkx5-1:lhx1-3:lhx3:Mef2-2:musculin:sall4:fir1:zfp-8:zfp236-1:zfp354:znf101:znf425:znf660:lmpt-3:myoD:neuroD-1:fer3l-3:nkx2l-1:neuroD-2:olig:phox:pou1:zfp-7:rfx3:ctcf:zfp-10:zfp677:sp5:tal:ptf-4:Tbx-20:Tbx-2/3a:Tbx-2/3c:ptf-5:vsx:rreb1:zfp-6:zf-2:zf-8:zfp-2:zfp236-2:zfp560-2:znf799:zscan2-1:alx4:Pbx-1:Pbx-…	46
138	dd_Smes_g4_10	965350	965910	561	*	k27ac_pooled_april21_peak_1100	3.88138	Promoter	2	964125	964538	414	2	MSTRG.705	MSTRG.705.3	-812	2.49755	0.331358	-0.056847	-0.0987999	0	0	0			-	-	MSTRG.10887:MSTRG.7998:MSTRG.23420:MSTRG.4288:MSTRG.4289:MSTRG.22163:MSTRG.16827:MSTRG.9571:MSTRG.624:MSTRG.11386:MSTRG.22087:MSTRG.10044:MSTRG.5025:MSTRG.3741:MSTRG.7287:MSTRG.19305:MSTRG.12851:MSTRG.1469:MSTRG.2717:MSTRG.14130:MSTRG.3824:MSTRG.764:MSTRG.2111:MSTRG.3565:MSTRG.7049:MSTRG.19418:MSTRG.20936:a:MSTRG.9027:MSTRG.9898:MSTRG.22489:MSTRG.17678:MSTRG.10086:MSTRG.18571:MSTRG.22605:MSTRG.46…	arnt-1:Lox5a:Lox5b:hinfp-1:hinfp-2:rest-1:zfp674:znf-1:znf91:znf333-1:znf652:zscan2-2:zscan2-6:hesl-3:nkx6-2:hesl-2:nerfin2-1:lhx2-3:mitfl-3:nf-ya1:nf-ya2:nkx6-1:pax2/5/8-1:Xfin:zfp-4:zbed-1:zf-5:a:scratch-like:smad4-1:snail-1:snail-2:da:ap4-1:mitfl-2:zeb-1:prdm15:zfp112:zfp408:znf486:Lox4:irx-1:irx6-1:irx6-2:irx6-3:znf180:zscan2-3:twist	26	MSTRG.10887:MSTRG.7896:MSTRG.23513:MSTRG.1217:MSTRG.4483:MSTRG.17936:MSTRG.20458:MSTRG.10604:MSTRG.2731:MSTRG.9479:MSTRG.5625:MSTRG.2171:MSTRG.22295:MSTRG.19765:MSTRG.18815:MSTRG.21195:SMESG000072873.1:MSTRG.19883:MSTRG.3843:MSTRG.5337:MSTRG.14880:MSTRG.5693:MSTRG.10837:MSTRG.18451:MSTRG.12975:MSTRG.17474:MSTRG.23309:MSTRG.9120:MSTRG.4403:MSTRG.13843:MSTRG.10592:MSTRG.2271:MSTRG.20979:MSTRG.4208:…	arnt-1:znf596:e22/23:egr-5:znf362:zf-4:rest-2:ets-3:elf1:foxA(P):foxC1:foxC2:foxF1 :foxF2:foxQ/D:foxJ1-1:foxJ1-2:foxJ1-3:foxJ1-4:foxJ1-5:foxN2/3-1:foxN2/3-2:foxN2/3-3:foxK1:foxK2:foxK3:gata123:gata456-3:hnf4:Hox4b:nkx5-1:egr-2:lhx3:smad1:smad9:neuroD-1:fer3l-3:pdp1:nkx2l-1:nr-1:nr2e1:tlx-2:neuroD-2:olig:otx-1:otx-2:pax6-1:pax6-2:znf181:zbtb24:ski-1:zfp-7:rfx3:sp6-9:sp8:Tbx-2/3a:Tbx-2/3c:vsx:yy2:z…	40
139	dd_Smes_g4_10	965402	965910	509	*	k27ac_pooled_april21_peak_1101	2.87379	Promoter	2	964125	964538	414	2	MSTRG.705	MSTRG.705.3	-864	2.49755	0.331358	-0.0617241	-0.10295	0	0	0			-	-	MSTRG.10887:MSTRG.7998:MSTRG.23420:MSTRG.4288:MSTRG.4289:MSTRG.22163:MSTRG.16827:MSTRG.9571:MSTRG.624:MSTRG.11386:MSTRG.22087:MSTRG.10044:MSTRG.5025:MSTRG.3741:MSTRG.7287:MSTRG.19305:MSTRG.12851:MSTRG.1469:MSTRG.2717:MSTRG.14130:MSTRG.3824:MSTRG.764:MSTRG.2111:MSTRG.3565:MSTRG.7049:MSTRG.19418:MSTRG.20936:a:MSTRG.9027:MSTRG.9898:MSTRG.22489:MSTRG.17678:MSTRG.10086:MSTRG.18571:MSTRG.22605:MSTRG.46…	arnt-1:Lox5a:Lox5b:hinfp-1:hinfp-2:rest-1:zfp674:znf-1:znf91:znf333-1:znf652:zscan2-2:zscan2-6:hesl-3:nkx6-2:hesl-2:nerfin2-1:lhx2-3:mitfl-3:nf-ya1:nf-ya2:nkx6-1:pax2/5/8-1:Xfin:zfp-4:zbed-1:zf-5:a:scratch-like:smad4-1:snail-1:snail-2:da:ap4-1:mitfl-2:zeb-1:prdm15:zfp112:zfp408:znf486:Lox4:irx-1:irx6-1:irx6-2:irx6-3:znf180:zscan2-3:twist	26	MSTRG.10887:MSTRG.7896:MSTRG.23513:MSTRG.1217:MSTRG.4483:MSTRG.17936:MSTRG.20458:MSTRG.10604:MSTRG.2731:MSTRG.9479:MSTRG.5625:MSTRG.2171:MSTRG.22295:MSTRG.19765:MSTRG.18815:MSTRG.21195:SMESG000072873.1:MSTRG.19883:MSTRG.3843:MSTRG.5337:MSTRG.14880:MSTRG.5693:MSTRG.10837:MSTRG.18451:MSTRG.12975:MSTRG.17474:MSTRG.23309:MSTRG.9120:MSTRG.4403:MSTRG.13843:MSTRG.10592:MSTRG.2271:MSTRG.20979:MSTRG.4208:…	arnt-1:znf596:e22/23:egr-5:znf362:zf-4:rest-2:ets-3:elf1:foxA(P):foxC1:foxC2:foxF1 :foxF2:foxQ/D:foxJ1-1:foxJ1-2:foxJ1-3:foxJ1-4:foxJ1-5:foxN2/3-1:foxN2/3-2:foxN2/3-3:foxK1:foxK2:foxK3:gata123:gata456-3:hnf4:Hox4b:nkx5-1:egr-2:lhx3:smad1:smad9:neuroD-1:fer3l-3:pdp1:nkx2l-1:nr-1:nr2e1:tlx-2:neuroD-2:olig:otx-1:otx-2:pax6-1:pax6-2:znf181:zbtb24:ski-1:zfp-7:rfx3:rfx7:sp6-9:sp8:Tbx-2/3a:Tbx-2/3c:vsx:…	40
140	dd_Smes_g4_10	1001831	1002061	231	*	k27ac_pooled_april21_peak_1104	4.78026	Distal Intergenic	2	1012212	1014697	2486	1	MSTRG.707	SMEST003328001.1	-10151	73.531	0.346358	-0.307012	-0.0920722	1	1	1	0.0156407	0.378478	ATF2	activating transcription factor 2 [Source:HGNC Symbol;Acc:HGNC:784]	MSTRG.4288:MSTRG.4289:MSTRG.22163:MSTRG.16827:MSTRG.9571:MSTRG.624:MSTRG.11386:MSTRG.22087:MSTRG.10044:MSTRG.5025:MSTRG.2717:MSTRG.9027:MSTRG.2722:MSTRG.11197:MSTRG.22732:MSTRG.308:MSTRG.1201:MSTRG.8933	hinfp-1:hinfp-2:rest-1:zfp674:znf-1:znf91:znf333-1:znf652:zscan2-2:zscan2-6:mitfl-3:scratch-like:znf143:egr-1:ovo-1:prdm13:gl:znf341	5	MSTRG.7896:MSTRG.7998:MSTRG.23420:SMESG000022963.1:MSTRG.5414:MSTRG.12684:MSTRG.20458:MSTRG.2221:MSTRG.14008:MSTRG.11379:MSTRG.22994:MSTRG.4327:MSTRG.2656:MSTRG.2731:MSTRG.23472:MSTRG.22528:MSTRG.19546:MSTRG.7741:MSTRG.22295:MSTRG.19765:MSTRG.3929:MSTRG.6819:MSTRG.11814:MSTRG.13758:MSTRG.18815:MSTRG.21195:SMESG000072873.1:MSTRG.19883:MSTRG.3843:MSTRG.5337:MSTRG.14880:MSTRG.5693:MSTRG.10837:MSTRG.…	znf596:Lox5a:Lox5b:barhl1:tlx-1:nkx5-3:rest-2:dbx:dll-1:ets-5:fli-2:fli-3:etv4:elf1:fli-1:foxD1:foxD2:foxD3:foxF1 :foxF2:foxG:foxL1:foxO:foxN(P):foxQ/D:foxJ1-1:foxJ1-2:foxJ1-3:foxJ1-4:foxJ1-5:foxN2/3-1:foxN2/3-2:foxN2/3-3:foxK1:foxK2:foxK3:gcm-2:gli-3:nkx6-2:nkx3-1:nkx5-2:nkx5-1:nerfin2-1:isl-1:isl-2:lhx1-3:mlx:myoD:nf-ya1:nf-ya2:nkx2l-1:a:nkx3-2:nr2f1:nr-1:nr2e1:tlx-2:hr51:onecut-1:onecut-2:onec…	62
141	dd_Smes_g4_10	1010680	1010909	230	*	k27ac_pooled_april21_peak_1106	4.50626	Distal Intergenic	2	1012212	1014697	2486	1	MSTRG.707	SMEST003328001.1	-1303	73.531	0.346358	-0.116512	-0.0680296	1	1	1	0.0156407	0.378478	ATF2	activating transcription factor 2 [Source:HGNC Symbol;Acc:HGNC:784]	-	-	0	MSTRG.10887:MSTRG.7896:MSTRG.10410:MSTRG.5414:MSTRG.12684:MSTRG.22126:SMESG000049970.1:SMESG000031904.1:MSTRG.221:MSTRG.2221:MSTRG.2484:MSTRG.1218:MSTRG.9193:MSTRG.10604:MSTRG.2731:MSTRG.9479:MSTRG.5625:MSTRG.2171:MSTRG.22528:MSTRG.19546:MSTRG.7741:MSTRG.22295:MSTRG.19765:MSTRG.3929:MSTRG.6819:MSTRG.11814:MSTRG.10087:MSTRG.20250:MSTRG.13758:MSTRG.18815:MSTRG.21195:SMESG000072873.1:MSTRG.19883:MST…	arnt-1:znf596:bsx:tlx-1:nkx5-3:zfp560-1:zscan2-5:zscan2-8:zf-6:dbx:egr*-2:egr4-1:egr4-2:ets-3:elf1:foxA(P):foxC1:foxC2:foxD1:foxD2:foxD3:foxF1 :foxF2:foxG:foxL1:foxO:pou-p1:foxP:foxN(P):foxQ/D:foxJ1-1:foxJ1-2:foxJ1-3:foxJ1-4:foxJ1-5:foxN2/3-1:foxN2/3-2:foxN2/3-3:foxK1:foxK2:foxK3:hesl-3:Hox4b:hesl-2:nerfin2-1:isl-1:isl-2:klf-3:klf-1:lbx:lhx1-3:lhx3:Mef2-1:gtf2a1:Mef2-2:meis-1:musculin:msx:smad1:s…	74
142	dd_Smes_g4_10	1076234	1076715	482	*	k27ac_pooled_april21_peak_1112	3.59791	Distal Intergenic	2	1097905	1098349	445	2	MSTRG.708	MSTRG.708.3	21634	8.47834	0.245327	-0.262186	-0.0834801	0	0	0	0.7421	0.405182	ACOX1	acyl-CoA oxidase 1 [Source:HGNC Symbol;Acc:HGNC:119]	MSTRG.7606	sp5	1	MSTRG.10887:MSTRG.7998:MSTRG.23420:MSTRG.21923:MSTRG.9638:SMESG000022963.1:MSTRG.12684:MSTRG.19544:MSTRG.4288:MSTRG.4289:MSTRG.22163:MSTRG.16827:MSTRG.9571:MSTRG.624:MSTRG.11386:MSTRG.22087:MSTRG.10044:MSTRG.5025:MSTRG.20458:MSTRG.2221:MSTRG.2484:MSTRG.1218:MSTRG.9193:MSTRG.5081:MSTRG.11405:MSTRG.20466:MSTRG.17923:MSTRG.22990:MSTRG.12700:MSTRG.8018:MSTRG.11935:MSTRG.23304:MSTRG.8862:MSTRG.5535:MS…	arnt-1:Lox5a:Lox5b:barhl2-1:barhl2-2:barhl1:nkx5-3:creb3l-1:hinfp-1:hinfp-2:rest-1:zfp674:znf-1:znf91:znf333-1:znf652:zscan2-2:zscan2-6:rest-2:dbx:egr*-2:egr4-1:egr4-2:emx1:gcm-2:gli-1:gli-2:gli-3:gata456-1:gata456-2:gata456-4:fezf2:gfi1:zfp541:zfhx3:prdm14:hesl-3:nkx6-2:hnf4:hesl-2:nkx3-1:nkx5-2:nkx5-1:nerfin2-1:isl-1:isl-2:atmin:zscan2-4:klf-3:klf-1:lhx2-3:lmx1-1:lhx1-3:lhx3:Mef2-1:gtf2a1:meox:…	96
143	dd_Smes_g4_10	2302058	2302305	248	*	k27ac_pooled_april21_peak_1139	4.64758	Intron (MSTRG.744.1/MSTRG.744, intron 2 of 2)	2	2297613	2305981	8369	2	MSTRG.744	MSTRG.744.1	3676	3.29863	0.428216	-0.565257	-0.795134	0	0	0	0.911915	0.0517886	GPR139	G protein-coupled receptor 139 [Source:HGNC Symbol;Acc:HGNC:19995]	-	-	0	MSTRG.7896:MSTRG.7998:MSTRG.23420:MSTRG.4288:MSTRG.4289:MSTRG.22163:MSTRG.16827:MSTRG.9571:MSTRG.624:MSTRG.11386:MSTRG.22087:MSTRG.10044:MSTRG.5025:MSTRG.20458:MSTRG.2484:MSTRG.1218:MSTRG.9193:MSTRG.9479:MSTRG.10087:MSTRG.20250:MSTRG.23309:MSTRG.9120:MSTRG.11405:MSTRG.20466:MSTRG.17923:MSTRG.22990:MSTRG.12700:MSTRG.8018:MSTRG.11935:MSTRG.7287:MSTRG.13843:MSTRG.23578:MSTRG.20904:MSTRG.12851:MSTRG.…	znf596:Lox5a:Lox5b:hinfp-1:hinfp-2:rest-1:zfp674:znf-1:znf91:znf333-1:znf652:zscan2-2:zscan2-6:rest-2:egr*-2:egr4-1:egr4-2:foxA(P):pou-p1:foxP:gata123:gata456-3:gcm-2:gli-1:gli-2:gli-3:gata456-1:gata456-2:gata456-4:nkx6-2:Hox4b:Hox1:Hox4a:nerfin2-1:atmin:zscan2-4:lhx1-3:lhx3:meis-1:meox:sall4:fir1:zfp-8:zfp236-1:zfp354:znf101:znf425:znf660:lmpt-3:nr2f1:hr51:onecut-1:onecut-2:onecut-3:onecut-5:hnf…	56
144	dd_Smes_g4_10	2309140	2309232	93	*	k27ac_pooled_april21_peak_1142	3.37382	Promoter	2	2308233	2308948	716	1	MSTRG.746	MSTRG.746.2	907	80.1017	0.255194	0.340075	0.0583801	0	0	0	0.935654	-0.0366593	HDC	histidine decarboxylase [Source:HGNC Symbol;Acc:HGNC:4855]	MSTRG.20466:MSTRG.17923:MSTRG.7450:MSTRG.5557:MSTRG.572:MSTRG.18286	gli-1:gli-2:irx-1:irx6-1:irx6-2:irx6-3	2	MSTRG.9597:MSTRG.6974:MSTRG.7998:MSTRG.23420:MSTRG.23513:MSTRG.5414:MSTRG.12684:MSTRG.19544:MSTRG.22126:SMESG000049970.1:SMESG000031904.1:MSTRG.221:MSTRG.11379:MSTRG.22994:MSTRG.4327:MSTRG.19528:MSTRG.2656:MSTRG.2731:MSTRG.23472:MSTRG.9479:MSTRG.5625:MSTRG.2171:MSTRG.10087:MSTRG.20250:MSTRG.18451:MSTRG.12975:MSTRG.17474:MSTRG.22990:MSTRG.12700:MSTRG.8018:MSTRG.11935:MSTRG.16138:MSTRG.3741:MSTRG.7…	pax3/7-1:alx3-2:Lox5a:Lox5b:e22/23:tlx-1:nkx5-3:creb3l-1:zfp560-1:zscan2-5:zscan2-8:zf-6:ets-5:fli-2:fli-3:ets-1:etv4:elf1:fli-1:foxA(P):foxC1:foxC2:pou-p1:foxP:foxK1:foxK2:foxK3:gli-3:gata456-1:gata456-2:gata456-4:prdm14:hesl-3:nkx6-2:Hox4b:hesl-2:Hox3a:nerfin2-1:cbt:lhx2-3:lmx1-1:lhx1-3:Mef2-1:gtf2a1:Mef2-2:msx:sall4:fir1:zfp-8:zfp236-1:zfp354:znf101:znf425:znf660:lmpt-3:neuroD-1:fer3l-3:nf-ya1…	71
145	dd_Smes_g4_10	2309473	2309483	11	*	k27ac_pooled_april21_peak_1143	3.43451	Distal Intergenic	2	2308233	2308948	716	1	MSTRG.746	MSTRG.746.2	1240	80.1017	0.255194	0.189994	-0.0155984	0	0	0	0.935654	-0.0366593	HDC	histidine decarboxylase [Source:HGNC Symbol;Acc:HGNC:4855]	MSTRG.20466:MSTRG.17923:MSTRG.7450:MSTRG.5557:MSTRG.572:MSTRG.18286	gli-1:gli-2:irx-1:irx6-1:irx6-2:irx6-3	2	MSTRG.9597:MSTRG.6974:MSTRG.7998:MSTRG.23420:MSTRG.23513:MSTRG.5414:MSTRG.12684:MSTRG.19544:MSTRG.22126:SMESG000049970.1:SMESG000031904.1:MSTRG.221:MSTRG.2221:MSTRG.11379:MSTRG.22994:MSTRG.4327:MSTRG.19528:MSTRG.2656:MSTRG.2731:MSTRG.23472:MSTRG.9479:MSTRG.5625:MSTRG.2171:MSTRG.11405:MSTRG.22990:MSTRG.12700:MSTRG.8018:MSTRG.11935:MSTRG.16138:MSTRG.3741:MSTRG.7287:MSTRG.13843:MSTRG.19305:MSTRG.991…	pax3/7-1:alx3-2:Lox5a:Lox5b:e22/23:tlx-1:nkx5-3:creb3l-1:zfp560-1:zscan2-5:zscan2-8:zf-6:dbx:ets-5:fli-2:fli-3:ets-1:etv4:elf1:fli-1:foxA(P):foxC1:foxC2:gcm-2:gli-3:gata456-1:gata456-2:gata456-4:prdm14:hesl-3:nkx6-2:Hox4b:hesl-2:Hox3a:nerfin2-1:cbt:lhx2-3:lmx1-1:lhx1-3:Mef2-1:gtf2a1:Mef2-2:msx:sall4:fir1:zfp-8:zfp236-1:zfp354:znf101:znf425:znf660:lmpt-3:neuroD-1:fer3l-3:nf-ya1:nf-ya2:neuroD-2:oli…	72
146	dd_Smes_g4_10	2439599	2440038	440	*	k27ac_pooled_april21_peak_1153	8.99753	Promoter	2	2439912	2440300	389	2	MSTRG.749	MSTRG.749.1	262	1.56784	0.506549	-0.539027	-0.648001	0	0	0			-	-	MSTRG.1217:MSTRG.4483:MSTRG.17936:MSTRG.11405:MSTRG.16974	egr-5:znf362:zf-4:gcm-2:gcm-1	3	MSTRG.6974:SMESG000022963.1:MSTRG.5414:MSTRG.12684:MSTRG.19544:MSTRG.4288:MSTRG.4289:MSTRG.22163:MSTRG.16827:MSTRG.9571:MSTRG.624:MSTRG.11386:MSTRG.22087:MSTRG.10044:MSTRG.5025:MSTRG.20458:MSTRG.2221:MSTRG.19091:MSTRG.2484:MSTRG.1218:MSTRG.9193:MSTRG.10604:MSTRG.11379:MSTRG.22994:MSTRG.4327:MSTRG.19528:MSTRG.2656:MSTRG.23472:MSTRG.22528:MSTRG.19546:MSTRG.7741:MSTRG.6819:MSTRG.11814:MSTRG.13758:MS…	alx3-2:barhl1:tlx-1:nkx5-3:creb3l-1:hinfp-1:hinfp-2:rest-1:zfp674:znf-1:znf91:znf333-1:znf652:zscan2-2:zscan2-6:rest-2:dbx:coe:egr*-2:egr4-1:egr4-2:ets-3:ets-5:fli-2:fli-3:ets-1:etv4:fli-1:foxD1:foxD2:foxD3:foxL1:foxO:foxN(P):foxK1:foxK2:foxK3:gata123:gata456-3:gata456-1:gata456-2:gata456-4:fezf2:gfi1:zfp541:zfhx3:prdm14:hesl-3:Hox4b:hesl-2:nkx3-1:nkx5-2:nerfin2-1:atmin:zscan2-4:cbt:klf-3:klf-1:e…	76
147	dd_Smes_g4_10	2603537	2603645	109	*	k27ac_pooled_april21_peak_1160	5.14493	Promoter	2	2556353	2603838	47486	2	MSTRG.753	SMEST002712002.1	193	1.5363	0.0756624	0.176078	-0.0450257	0	0	0	0.230714	0.42374	PCDH11Y	protocadherin 11 Y-linked [Source:HGNC Symbol;Acc:HGNC:15813]	-	-	0	MSTRG.10887:MSTRG.9597:MSTRG.6974:MSTRG.7998:MSTRG.23420:MSTRG.1217:MSTRG.4483:MSTRG.17936:MSTRG.12684:MSTRG.19544:MSTRG.2484:MSTRG.1218:MSTRG.9193:MSTRG.10604:MSTRG.11379:MSTRG.22994:MSTRG.4327:MSTRG.19528:MSTRG.2656:MSTRG.2731:MSTRG.23472:MSTRG.23309:MSTRG.9120:MSTRG.12700:MSTRG.8018:MSTRG.11935:MSTRG.23304:MSTRG.8862:MSTRG.5535:MSTRG.17691:MSTRG.7287:MSTRG.12851:MSTRG.2271:MSTRG.18888:MSTRG.14…	arnt-1:pax3/7-1:alx3-2:Lox5a:Lox5b:egr-5:znf362:zf-4:nkx5-3:creb3l-1:egr*-2:egr4-1:egr4-2:ets-3:ets-5:fli-2:fli-3:ets-1:etv4:elf1:fli-1:gata123:gata456-3:gata456-1:gata456-2:gata456-4:fezf2:gfi1:zfp541:zfhx3:nkx6-2:nerfin2-1:egr-2:lbx:lhx2-3:lmx1-1:lhx1-3:lhx3:meis-1:msx:sall4:fir1:zfp-8:zfp236-1:zfp354:znf101:znf425:znf660:lmpt-3:mitfl-3:nf-ya1:nf-ya2:nkx6-1:nr-1:nr2e1:tlx-2:otx-1:otx-2:pitx:Pre…	66
148	dd_Smes_g4_10	2603705	2603833	129	*	k27ac_pooled_april21_peak_1161	3.58622	Promoter	2	2556353	2603838	47486	2	MSTRG.753	SMEST002712002.1	5	1.5363	0.0756624	0.206422	-0.236539	0	0	0	0.230714	0.42374	PCDH11Y	protocadherin 11 Y-linked [Source:HGNC Symbol;Acc:HGNC:15813]	-	-	0	MSTRG.10887:MSTRG.9597:MSTRG.6974:MSTRG.7998:MSTRG.23420:MSTRG.23513:MSTRG.1217:MSTRG.4483:MSTRG.17936:MSTRG.12684:MSTRG.19544:MSTRG.2484:MSTRG.1218:MSTRG.9193:MSTRG.10604:MSTRG.11379:MSTRG.22994:MSTRG.4327:MSTRG.19528:MSTRG.2656:MSTRG.2731:MSTRG.23472:MSTRG.23309:MSTRG.9120:MSTRG.12700:MSTRG.8018:MSTRG.11935:MSTRG.23304:MSTRG.8862:MSTRG.5535:MSTRG.17691:MSTRG.7287:MSTRG.12851:MSTRG.17848:MSTRG.9…	arnt-1:pax3/7-1:alx3-2:Lox5a:Lox5b:e22/23:egr-5:znf362:zf-4:nkx5-3:creb3l-1:egr*-2:egr4-1:egr4-2:ets-3:ets-5:fli-2:fli-3:ets-1:etv4:elf1:fli-1:gata123:gata456-3:gata456-1:gata456-2:gata456-4:fezf2:gfi1:zfp541:zfhx3:nkx6-2:nerfin2-1:isl-1:isl-2:egr-2:lbx:lhx2-3:lmx1-1:lhx1-3:lhx3:meis-1:msx:mitfl-3:nf-ya1:nf-ya2:nkx2l-1:nkx3-2:nkx6-1:nr-1:nr2e1:tlx-2:hr51:otx-1:otx-2:pitx:Prep:pou1:pou4-1:pou4-2:z…	69
149	dd_Smes_g4_10	2618554	2618763	210	*	k27ac_pooled_april21_peak_1164	6.36931	Distal Intergenic	2	2597745	2603838	6094	2	MSTRG.753	MSTRG.753.7	-14716	1.5363	0.0756624	-0.437884	-0.493714	0	0	0	0.230714	0.42374	PCDH11Y	protocadherin 11 Y-linked [Source:HGNC Symbol;Acc:HGNC:15813]	-	-	0	MSTRG.7896:MSTRG.6974:MSTRG.7998:MSTRG.23420:SMESG000022963.1:MSTRG.12684:MSTRG.4288:MSTRG.4289:MSTRG.22163:MSTRG.16827:MSTRG.9571:MSTRG.624:MSTRG.11386:MSTRG.22087:MSTRG.10044:MSTRG.5025:MSTRG.19091:MSTRG.5625:MSTRG.2171:MSTRG.22528:MSTRG.19546:MSTRG.7741:MSTRG.22295:MSTRG.19765:MSTRG.3929:MSTRG.6819:MSTRG.11814:MSTRG.10087:MSTRG.20250:MSTRG.23304:MSTRG.8862:MSTRG.5535:MSTRG.17691:MSTRG.7287:MST…	znf596:alx3-2:Lox5a:Lox5b:barhl1:nkx5-3:hinfp-1:hinfp-2:rest-1:zfp674:znf-1:znf91:znf333-1:znf652:zscan2-2:zscan2-6:coe:foxC1:foxC2:foxD1:foxD2:foxD3:foxF1 :foxF2:foxG:foxL1:foxO:pou-p1:foxP:fezf2:gfi1:zfp541:zfhx3:nkx6-2:hnf4:Hox4b:nkx3-1:nkx5-2:lhx2-1:lhx2-4:lhx2-3:lmx1-1:Mef2-1:gtf2a1:Mef2-2:msx:sall4:fir1:zfp-8:zfp236-1:zfp354:znf101:znf425:znf660:lmpt-3:mitfl-3:myoD:nf-ya1:nf-ya2:pax2/5/8-1:…	53
150	dd_Smes_g4_10	3117760	3118014	255	*	k27ac_pooled_april21_peak_1215	5.05955	Distal Intergenic	2	3129666	3132888	3223	2	MSTRG.764	SMEST002774001.1	14874	3.90858	0.128571	-0.507807	-0.539291	0	0	0	0.222219	-0.391141	NKX6-1	NK6 homeobox 1 [Source:HGNC Symbol;Acc:HGNC:7839]	MSTRG.2731:MSTRG.10215:MSTRG.9898:MSTRG.11197:MSTRG.22732:MSTRG.308:MSTRG.1201:MSTRG.8933:MSTRG.4514:MSTRG.3909	elf1:cbt:smad4-1:egr-1:ovo-1:prdm13:gl:znf341:ikzf1:zfp362	5	MSTRG.9597:MSTRG.4288:MSTRG.4289:MSTRG.22163:MSTRG.16827:MSTRG.9571:MSTRG.624:MSTRG.11386:MSTRG.22087:MSTRG.10044:MSTRG.5025:MSTRG.19091:MSTRG.2484:MSTRG.1218:MSTRG.9193:MSTRG.11379:MSTRG.22994:MSTRG.4327:MSTRG.19528:MSTRG.2656:MSTRG.23472:MSTRG.22528:MSTRG.19546:MSTRG.7741:MSTRG.3929:MSTRG.6819:MSTRG.11814:MSTRG.23309:MSTRG.9120:MSTRG.11405:MSTRG.22990:MSTRG.23304:MSTRG.8862:MSTRG.5535:MSTRG.176…	pax3/7-1:hinfp-1:hinfp-2:rest-1:zfp674:znf-1:znf91:znf333-1:znf652:zscan2-2:zscan2-6:coe:egr*-2:egr4-1:egr4-2:ets-5:fli-2:fli-3:ets-1:etv4:fli-1:foxD1:foxD2:foxD3:foxG:foxL1:foxO:gata123:gata456-3:gcm-2:gli-3:fezf2:gfi1:zfp541:zfhx3:Hox4b:hesl-2:nkx3-1:nkx5-2:nerfin2-1:isl-1:isl-2:atmin:zscan2-4:klf-3:klf-1:egr-2:lhx1-3:lhx3:meis-1:mlx:smad1:smad9:mitfl-3:myoD:neuroD-1:fer3l-3:nf-ya1:nf-ya2:nkx2l…	72
151	dd_Smes_g4_10	3118193	3118463	271	*	k27ac_pooled_april21_peak_1215	5.05955	Distal Intergenic	2	3129666	3132888	3223	2	MSTRG.764	SMEST002774001.1	14425	3.90858	0.128571	-0.507807	-0.539291	0	0	0	0.222219	-0.391141	NKX6-1	NK6 homeobox 1 [Source:HGNC Symbol;Acc:HGNC:7839]	MSTRG.2731:MSTRG.10215:MSTRG.9898:MSTRG.11197:MSTRG.22732:MSTRG.308:MSTRG.1201:MSTRG.8933:MSTRG.4514:MSTRG.3909	elf1:cbt:smad4-1:egr-1:ovo-1:prdm13:gl:znf341:ikzf1:zfp362	5	MSTRG.7998:MSTRG.23420:MSTRG.12684:MSTRG.4288:MSTRG.4289:MSTRG.22163:MSTRG.16827:MSTRG.9571:MSTRG.624:MSTRG.11386:MSTRG.22087:MSTRG.10044:MSTRG.5025:MSTRG.19091:MSTRG.2484:MSTRG.1218:MSTRG.9193:MSTRG.11379:MSTRG.22994:MSTRG.4327:MSTRG.19528:MSTRG.2656:MSTRG.23472:MSTRG.23309:MSTRG.9120:MSTRG.11405:MSTRG.22990:MSTRG.23304:MSTRG.8862:MSTRG.5535:MSTRG.17691:MSTRG.7287:MSTRG.13843:MSTRG.19305:MSTRG.7…	Lox5a:Lox5b:nkx5-3:hinfp-1:hinfp-2:rest-1:zfp674:znf-1:znf91:znf333-1:znf652:zscan2-2:zscan2-6:coe:egr*-2:egr4-1:egr4-2:ets-5:fli-2:fli-3:ets-1:etv4:fli-1:gata123:gata456-3:gcm-2:gli-3:fezf2:gfi1:zfp541:zfhx3:nkx6-2:Hox4b:hesl-2:nkx3-1:nkx5-2:nerfin2-1:atmin:zscan2-4:klf-3:klf-1:egr-2:lhx1-3:lhx3:meis-1:mlx:smad1:smad9:mitfl-3:myoD:neuroD-1:fer3l-3:nf-ya1:nf-ya2:nkx2l-1:a:nkx6-1:nr2f1:onecut-1:on…	68
152	dd_Smes_g4_10	3128343	3128447	105	*	k27ac_pooled_april21_peak_1219	8.71968	Distal Intergenic	2	3129666	3132888	3223	2	MSTRG.764	SMEST002774001.1	4441	3.90858	0.128571	-0.414978	-0.753584	0	0	0	0.222219	-0.391141	NKX6-1	NK6 homeobox 1 [Source:HGNC Symbol;Acc:HGNC:7839]	MSTRG.19581:MSTRG.18805	neuroD-1:fer3l-3	1	MSTRG.10887:MSTRG.7998:MSTRG.23420:MSTRG.12684:MSTRG.4288:MSTRG.4289:MSTRG.22163:MSTRG.16827:MSTRG.9571:MSTRG.624:MSTRG.11386:MSTRG.22087:MSTRG.10044:MSTRG.5025:MSTRG.20458:MSTRG.9479:MSTRG.10087:MSTRG.20250:MSTRG.18815:MSTRG.21195:SMESG000072873.1:MSTRG.19883:MSTRG.3843:MSTRG.5337:MSTRG.14880:MSTRG.5693:MSTRG.10837:MSTRG.18451:MSTRG.12975:MSTRG.17474:MSTRG.23309:MSTRG.9120:MSTRG.20466:MSTRG.1792…	arnt-1:Lox5a:Lox5b:nkx5-3:hinfp-1:hinfp-2:rest-1:zfp674:znf-1:znf91:znf333-1:znf652:zscan2-2:zscan2-6:rest-2:foxA(P):pou-p1:foxP:foxQ/D:foxJ1-1:foxJ1-2:foxJ1-3:foxJ1-4:foxJ1-5:foxN2/3-1:foxN2/3-2:foxN2/3-3:foxK1:foxK2:foxK3:gata123:gata456-3:gli-1:gli-2:fezf2:gfi1:zfp541:zfhx3:prdm14:hesl-3:nkx6-2:hnf4:hesl-2:nkx3-1:nkx5-2:nkx5-1:Hox1:Hox4a:nerfin2-1:cbt:klf-1:lhx2-1:lhx2-4:lhx2-3:lmx1-1:lhx1-3:m…	67
153	dd_Smes_g4_10	3128754	3128967	214	*	k27ac_pooled_april21_peak_1219	8.71968	Distal Intergenic	2	3129666	3132888	3223	2	MSTRG.764	SMEST002774001.1	3921	3.90858	0.128571	-0.414978	-0.753584	0	0	0	0.222219	-0.391141	NKX6-1	NK6 homeobox 1 [Source:HGNC Symbol;Acc:HGNC:7839]	MSTRG.19581:MSTRG.18805	neuroD-1:fer3l-3	1	MSTRG.10887:MSTRG.7998:MSTRG.23420:MSTRG.21923:MSTRG.9638:MSTRG.12684:MSTRG.4288:MSTRG.4289:MSTRG.22163:MSTRG.16827:MSTRG.9571:MSTRG.624:MSTRG.11386:MSTRG.22087:MSTRG.10044:MSTRG.5025:MSTRG.20458:MSTRG.9479:MSTRG.18815:MSTRG.21195:SMESG000072873.1:MSTRG.19883:MSTRG.3843:MSTRG.5337:MSTRG.14880:MSTRG.5693:MSTRG.10837:MSTRG.18451:MSTRG.12975:MSTRG.17474:MSTRG.23309:MSTRG.9120:MSTRG.20466:MSTRG.17923…	arnt-1:Lox5a:Lox5b:barhl2-1:barhl2-2:nkx5-3:hinfp-1:hinfp-2:rest-1:zfp674:znf-1:znf91:znf333-1:znf652:zscan2-2:zscan2-6:rest-2:foxA(P):foxQ/D:foxJ1-1:foxJ1-2:foxJ1-3:foxJ1-4:foxJ1-5:foxN2/3-1:foxN2/3-2:foxN2/3-3:foxK1:foxK2:foxK3:gata123:gata456-3:gli-1:gli-2:gata456-1:gata456-2:gata456-4:fezf2:gfi1:zfp541:zfhx3:prdm14:hesl-3:nkx6-2:hnf4:hesl-2:nkx3-1:nkx5-2:nkx5-1:Hox1:Hox4a:nerfin2-1:cbt:klf-3:…	70
154	dd_Smes_g4_10	3132807	3133044	238	*	k27ac_pooled_april21_peak_1222	5.9903	Promoter	2	3129666	3132888	3223	2	MSTRG.764	SMEST002774001.1	0	3.90858	0.128571	-0.374611	-0.570538	0	0	0	0.222219	-0.391141	NKX6-1	NK6 homeobox 1 [Source:HGNC Symbol;Acc:HGNC:7839]	MSTRG.1217:MSTRG.4483:MSTRG.17936:MSTRG.4288:MSTRG.4289:MSTRG.22163:MSTRG.16827:MSTRG.9571:MSTRG.624:MSTRG.11386:MSTRG.22087:MSTRG.10044:MSTRG.5025:MSTRG.11379:MSTRG.22994:MSTRG.4327:MSTRG.19528:MSTRG.2656:MSTRG.2731:MSTRG.23472:MSTRG.20466:MSTRG.17923:MSTRG.23304:MSTRG.8862:MSTRG.5535:MSTRG.17691:MSTRG.16138:MSTRG.14130:MSTRG.3824:MSTRG.5260:MSTRG.23512:MSTRG.9977:MSTRG.2722:MSTRG.657	egr-5:znf362:zf-4:hinfp-1:hinfp-2:rest-1:zfp674:znf-1:znf91:znf333-1:znf652:zscan2-2:zscan2-6:ets-5:fli-2:fli-3:ets-1:etv4:elf1:fli-1:gli-1:gli-2:fezf2:gfi1:zfp541:zfhx3:prdm14:nf-ya1:nf-ya2:ctcf:zfp-10:zfp677:znf143:twist	14	MSTRG.21923:MSTRG.9638:MSTRG.5414:MSTRG.19544:MSTRG.2484:MSTRG.1218:MSTRG.9193:MSTRG.10604:MSTRG.5625:MSTRG.2171:MSTRG.10087:MSTRG.20250:MSTRG.4403:MSTRG.13843:MSTRG.12851:MSTRG.17848:MSTRG.9911:MSTRG.10215:MSTRG.10177:MSTRG.15979:MSTRG.2271:MSTRG.1469:MSTRG.7427:MSTRG.6954:MSTRG.4208:MSTRG.16892:MSTRG.11214:MSTRG.8071:MSTRG.22379:MSTRG.9335:MSTRG.23136:MSTRG.2111:MSTRG.12215:MSTRG.21546:MSTRG.15…	barhl2-1:barhl2-2:tlx-1:creb3l-1:egr*-2:egr4-1:egr4-2:ets-3:foxC1:foxC2:pou-p1:foxP:hnf4:Hox4b:nerfin2-1:isl-1:isl-2:cbt:klf-3:klf-1:egr-2:lhx2-3:lhx1-3:msx:smad1:smad9:myoD:nr-1:nr2e1:tlx-2:hr51:pax2/5/8-1:pax6-1:pax6-2:phox:pou4-1:pou4-2:zfp-7:rx:scratch-like:shox:smad4-1:klf-2:sp6-9:sp8:six4:Tbx-1/10:Tbx-2/3a:Tbx-2/3c:ap4-1:ptf-5:znf333-2:znf207:zeb-1:egr-1:ovo-1:prdm13:gl:znf341:alx4:egr4-3:i…	50
155	dd_Smes_g4_10	3132807	3133249	443	*	k27ac_pooled_april21_peak_1223	2.94004	Promoter	2	3129666	3132888	3223	2	MSTRG.764	SMEST002774001.1	0	3.90858	0.128571	-0.374611	-0.570538	0	0	0	0.222219	-0.391141	NKX6-1	NK6 homeobox 1 [Source:HGNC Symbol;Acc:HGNC:7839]	MSTRG.1217:MSTRG.4483:MSTRG.17936:MSTRG.4288:MSTRG.4289:MSTRG.22163:MSTRG.16827:MSTRG.9571:MSTRG.624:MSTRG.11386:MSTRG.22087:MSTRG.10044:MSTRG.5025:MSTRG.11379:MSTRG.22994:MSTRG.4327:MSTRG.19528:MSTRG.2656:MSTRG.2731:MSTRG.23472:MSTRG.20466:MSTRG.17923:MSTRG.23304:MSTRG.8862:MSTRG.5535:MSTRG.17691:MSTRG.16138:MSTRG.14130:MSTRG.3824:MSTRG.5260:MSTRG.23512:MSTRG.9977:MSTRG.2722:MSTRG.657	egr-5:znf362:zf-4:hinfp-1:hinfp-2:rest-1:zfp674:znf-1:znf91:znf333-1:znf652:zscan2-2:zscan2-6:ets-5:fli-2:fli-3:ets-1:etv4:elf1:fli-1:gli-1:gli-2:fezf2:gfi1:zfp541:zfhx3:prdm14:nf-ya1:nf-ya2:ctcf:zfp-10:zfp677:znf143:twist	14	MSTRG.21923:MSTRG.9638:MSTRG.5414:MSTRG.19544:MSTRG.2484:MSTRG.1218:MSTRG.9193:MSTRG.10604:MSTRG.5625:MSTRG.2171:MSTRG.10087:MSTRG.20250:MSTRG.4403:MSTRG.13843:MSTRG.12851:MSTRG.17848:MSTRG.9911:MSTRG.10215:MSTRG.10177:MSTRG.15979:MSTRG.2271:MSTRG.1469:MSTRG.7427:MSTRG.6954:MSTRG.4208:MSTRG.16892:MSTRG.11214:MSTRG.8071:MSTRG.22379:MSTRG.9335:MSTRG.23136:MSTRG.2111:MSTRG.12215:MSTRG.21546:MSTRG.15…	barhl2-1:barhl2-2:tlx-1:creb3l-1:egr*-2:egr4-1:egr4-2:ets-3:foxC1:foxC2:pou-p1:foxP:hnf4:Hox4b:nerfin2-1:isl-1:isl-2:cbt:klf-3:klf-1:egr-2:lhx2-3:lhx1-3:msx:smad1:smad9:myoD:nr-1:nr2e1:tlx-2:hr51:pax2/5/8-1:pax6-1:pax6-2:phox:pou4-1:pou4-2:zfp-7:rx:scratch-like:shox:smad4-1:klf-2:sp6-9:sp8:six4:Tbx-1/10:Tbx-2/3a:Tbx-2/3c:ap4-1:ptf-5:znf333-2:znf207:zeb-1:egr-1:ovo-1:prdm13:gl:znf341:alx4:egr4-3:i…	50
156	dd_Smes_g4_10	3137063	3137709	647	*	k27ac_pooled_april21_peak_1225	4.53251	Distal Intergenic	2	3129722	3132888	3167	2	MSTRG.764	MSTRG.764.3	-4175	3.90858	0.128571	-0.342647	-0.410472	0	0	0	0.222219	-0.391141	NKX6-1	NK6 homeobox 1 [Source:HGNC Symbol;Acc:HGNC:7839]	-	-	0	MSTRG.7896:MSTRG.23513:MSTRG.5414:MSTRG.12684:MSTRG.19544:MSTRG.4288:MSTRG.4289:MSTRG.22163:MSTRG.16827:MSTRG.9571:MSTRG.624:MSTRG.11386:MSTRG.22087:MSTRG.10044:MSTRG.5025:MSTRG.2221:MSTRG.2484:MSTRG.1218:MSTRG.9193:MSTRG.22528:MSTRG.19546:MSTRG.7741:MSTRG.3929:MSTRG.6819:MSTRG.11814:MSTRG.10087:MSTRG.20250:MSTRG.13758:MSTRG.18451:MSTRG.12975:MSTRG.17474:MSTRG.22990:MSTRG.23304:MSTRG.8862:MSTRG.5…	znf596:e22/23:tlx-1:nkx5-3:creb3l-1:hinfp-1:hinfp-2:rest-1:zfp674:znf-1:znf91:znf333-1:znf652:zscan2-2:zscan2-6:dbx:egr*-2:egr4-1:egr4-2:foxD1:foxD2:foxD3:foxG:foxL1:foxO:pou-p1:foxP:foxN(P):foxK1:foxK2:foxK3:gli-3:fezf2:gfi1:zfp541:zfhx3:hesl-3:hnf4:Hox4b:hesl-2:Hox1:Hox4a:Hox3a:nerfin2-1:atmin:zscan2-4:cbt:klf-3:klf-1:egr-2:lhx1-3:meis-1:musculin:sall4:fir1:zfp-8:zfp236-1:zfp354:znf101:znf425:z…	81
157	dd_Smes_g4_10	3218343	3218552	210	*	k27ac_pooled_april21_peak_1233	4.09983	Distal Intergenic	2	3216026	3217908	1883	1	MSTRG.770	SMEST002785001.1	2317	97.2453	0.580326	-0.416685	-0.126666	0	0	0	0.733036	0.0801502	EIF4E2	eukaryotic translation initiation factor 4E family member 2 [Source:HGNC Symbol;Acc:HGNC:3293]	MSTRG.22126:SMESG000049970.1:SMESG000031904.1:MSTRG.221:MSTRG.2484:MSTRG.1218:MSTRG.9193:MSTRG.17155:SMESG000049967.1:MSTRG.10215:MSTRG.261:MSTRG.2111:MSTRG.22605:MSTRG.20330:MSTRG.21518:MSTRG.8827	zfp560-1:zscan2-5:zscan2-8:zf-6:egr*-2:egr4-1:egr4-2:atmin:zscan2-4:cbt:nkx3-2:pax2/5/8-1:mitfl-2:znf333-2:znf207:egr4-3	10	MSTRG.10887:MSTRG.12684:MSTRG.20458:MSTRG.14008:MSTRG.19091:MSTRG.10604:MSTRG.11379:MSTRG.22994:MSTRG.4327:MSTRG.19528:MSTRG.2656:MSTRG.23472:MSTRG.5625:MSTRG.2171:MSTRG.10087:MSTRG.20250:MSTRG.11405:MSTRG.20466:MSTRG.17923:MSTRG.22990:MSTRG.12700:MSTRG.8018:MSTRG.11935:MSTRG.23304:MSTRG.8862:MSTRG.5535:MSTRG.17691:MSTRG.16138:MSTRG.13843:MSTRG.12851:MSTRG.15979:MSTRG.7427:MSTRG.1897:MSTRG.6445:M…	arnt-1:nkx5-3:rest-2:dll-1:coe:ets-3:ets-5:fli-2:fli-3:ets-1:etv4:fli-1:foxC1:foxC2:pou-p1:foxP:gcm-2:gli-1:gli-2:gli-3:gata456-1:gata456-2:gata456-4:fezf2:gfi1:zfp541:zfhx3:prdm14:Hox4b:nerfin2-1:klf-1:lhx1-3:meis-1:musculin:sall4:fir1:zfp-8:zfp236-1:zfp354:znf101:znf425:znf660:lmpt-3:smad1:smad9:myoD:nkx2l-1:nr2f1:nr4a-1:nr4a-2:nr-1:nr2e1:tlx-2:hr51:Pbx-4:Prep:Xfin:zfp-4:zbed-1:zf-5:pou4-1:pou4…	63
158	dd_Smes_g4_10	3269330	3269546	217	*	k27ac_pooled_april21_peak_1237	5.29633	Distal Intergenic	2	3263221	3267058	3838	2	MSTRG.771	SMEST002793001.1	-2272	0.346622	0.0249979	-0.434441	-0.567875	0	0	0	0.936452	0.129538	RBMS1	RNA binding motif single stranded interacting protein 1 [Source:HGNC Symbol;Acc:HGNC:9907]	-	-	0	MSTRG.10887:MSTRG.7998:MSTRG.23420:MSTRG.19544:MSTRG.4288:MSTRG.4289:MSTRG.22163:MSTRG.16827:MSTRG.9571:MSTRG.624:MSTRG.11386:MSTRG.22087:MSTRG.10044:MSTRG.5025:MSTRG.20458:MSTRG.2221:MSTRG.14008:MSTRG.2484:MSTRG.1218:MSTRG.9193:MSTRG.10604:MSTRG.19528:MSTRG.2656:MSTRG.2731:MSTRG.23472:MSTRG.10087:MSTRG.20250:MSTRG.18815:MSTRG.21195:SMESG000072873.1:MSTRG.19883:MSTRG.3843:MSTRG.5337:MSTRG.14880:M…	arnt-1:Lox5a:Lox5b:creb3l-1:hinfp-1:hinfp-2:rest-1:zfp674:znf-1:znf91:znf333-1:znf652:zscan2-2:zscan2-6:rest-2:dbx:dll-1:egr*-2:egr4-1:egr4-2:ets-3:ets-1:etv4:elf1:fli-1:pou-p1:foxP:foxQ/D:foxJ1-1:foxJ1-2:foxJ1-3:foxJ1-4:foxJ1-5:foxN2/3-1:foxN2/3-2:foxN2/3-3:foxK1:foxK2:foxK3:gcm-2:gli-3:hesl-3:nkx6-2:hnf4:hesl-2:nkx3-1:nkx5-2:cbt:lhx2-3:lhx1-3:sall4:fir1:zfp-8:zfp236-1:zfp354:znf101:znf425:znf66…	61
159	dd_Smes_g4_10	3731218	3731951	734	*	k27ac_pooled_april21_peak_1250	2.87379	Intron (MSTRG.779.1/MSTRG.779, intron 3 of 14)	2	3697429	3733673	36245	2	MSTRG.779	MSTRG.779.1	1722	5.83232	0.0822468	-0.7509	-1.2105	1	1	1	4.45559e-06	-0.839419	CLSTN2	calsyntenin 2 [Source:HGNC Symbol;Acc:HGNC:17448]	MSTRG.12684:MSTRG.5349:MSTRG.6378:MSTRG.19902:MSTRG.19125:MSTRG.2385:MSTRG.22069:MSTRG.1684:SMESG000061747.1:MSTRG.5091:MSTRG.8974:MSTRG.13371:SMESG000077917.1:MSTRG.22352:MSTRG.2646	nkx5-3:znf181:zbtb24:ski-1:prdm1-1:zfp-3:zfp878:zbed1:zscan2-7:arx:nkx1:nkx1-1:nkx1-2:pou2/3-1:pou2/3-2	6	MSTRG.7896:MSTRG.7998:MSTRG.23420:MSTRG.23513:MSTRG.2221:MSTRG.11379:MSTRG.22994:MSTRG.4327:MSTRG.19528:MSTRG.23472:MSTRG.9479:MSTRG.5625:MSTRG.2171:MSTRG.13758:MSTRG.18451:MSTRG.12975:MSTRG.17474:MSTRG.23304:MSTRG.8862:MSTRG.5535:MSTRG.17691:MSTRG.16138:MSTRG.7287:MSTRG.7792:MSTRG.6856:MSTRG.10592:MSTRG.10177:MSTRG.2271:MSTRG.18888:MSTRG.4069:MSTRG.17209:MSTRG.7427:MSTRG.20979:MSTRG.12930:MSTRG.…	znf596:Lox5a:Lox5b:e22/23:dbx:ets-5:fli-2:fli-3:ets-1:fli-1:foxA(P):foxC1:foxC2:foxN(P):foxK1:foxK2:foxK3:fezf2:gfi1:zfp541:zfhx3:prdm14:nkx6-2:nkx3-1:nkx5-2:nkx5-1:klf-3:egr-2:lbx:lhx2-1:lhx2-4:lhx1-3:lhx3:Mef2-1:gtf2a1:Mef2-2:meis-1:myoD:neuroD-1:fer3l-3:hr51:neuroD-2:olig:onecut-1:onecut-2:onecut-3:onecut-5:hnf6:cux-2:Pbx-4:Prep:Xfin:zfp-4:zbed-1:zf-5:pou4-1:pou4-2:pou6-2:zfp-7:klf-2:ap4-1:ptf…	57
160	dd_Smes_g4_10	3819757	3820102	346	*	k27ac_pooled_april21_peak_1261	3.70272	Promoter	2	3806107	3820699	14593	2	MSTRG.788	MSTRG.788.1	597	10.9456	0.244337	0.18215	-0.138925	0	0	0	0.811343	0.0624706	LRP12	LDL receptor related protein 12 [Source:HGNC Symbol;Acc:HGNC:31708]	-	-	0	MSTRG.7896:MSTRG.9597:MSTRG.7998:MSTRG.23420:MSTRG.1217:MSTRG.4483:MSTRG.17936:MSTRG.12684:MSTRG.19544:MSTRG.4288:MSTRG.4289:MSTRG.22163:MSTRG.16827:MSTRG.9571:MSTRG.624:MSTRG.11386:MSTRG.22087:MSTRG.10044:MSTRG.5025:MSTRG.20458:MSTRG.2221:MSTRG.5625:MSTRG.2171:MSTRG.22295:MSTRG.19765:MSTRG.10087:MSTRG.20250:MSTRG.18815:MSTRG.21195:SMESG000072873.1:MSTRG.19883:MSTRG.3843:MSTRG.5337:MSTRG.14880:MS…	znf596:pax3/7-1:Lox5a:Lox5b:egr-5:znf362:zf-4:nkx5-3:creb3l-1:hinfp-1:hinfp-2:rest-1:zfp674:znf-1:znf91:znf333-1:znf652:zscan2-2:zscan2-6:rest-2:dbx:foxC1:foxC2:foxF1 :foxF2:pou-p1:foxP:foxQ/D:foxJ1-1:foxJ1-2:foxJ1-3:foxJ1-4:foxJ1-5:foxN2/3-1:foxN2/3-2:foxN2/3-3:foxK1:foxK2:foxK3:gata123:gata456-3:gli-1:gli-2:fezf2:gfi1:zfp541:zfhx3:prdm14:nkx6-2:klf-3:klf-1:lhx2-3:lmx1-1:lhx1-3:Mef2-1:gtf2a1:mus…	59
161	dd_Smes_g4_10	4123107	4123134	28	*	k27ac_pooled_april21_peak_1278	3.20591	Promoter	2	4122352	4181982	59631	1	MSTRG.799	MSTRG.799.5	755	2.13621	0.221223	0.26143	0.0159601	1	0	0	0.000455084	-0.622142	FAT4	FAT atypical cadherin 4 [Source:HGNC Symbol;Acc:HGNC:23109]	MSTRG.10087:MSTRG.20250:MSTRG.16138:MSTRG.19305:MSTRG.14130:MSTRG.3824:MSTRG.6003:a:MSTRG.17044:MSTRG.18823:MSTRG.8332:MSTRG.3565:MSTRG.7049:MSTRG.19418:MSTRG.20936:MSTRG.14619:MSTRG.11128:MSTRG.7499:MSTRG.16707:MSTRG.22089:MSTRG.1069:MSTRG.10038:MSTRG.7450:MSTRG.5557:MSTRG.572:MSTRG.18286:MSTRG.10142:MSTRG.10139:MSTRG.22888:MSTRG.23238:MSTRG.18813:MSTRG.12028	pou-p1:foxP:prdm14:hesl-2:nf-ya1:nf-ya2:nkx2l-1:a:nr2f1:nr4a-1:nr4a-2:Xfin:zfp-4:zbed-1:zf-5:zfp-7:gtf2b-4:zfp-2:zfp236-2:zfp560-2:znf799:zscan2-1:irx-1:irx6-1:irx6-2:irx6-3:osr-1:osr-2:nkx2l-2:nkx2-2:nkx2-3:nkx2-4	15	MSTRG.7896:MSTRG.6974:MSTRG.5414:MSTRG.12684:MSTRG.2221:MSTRG.2484:MSTRG.1218:MSTRG.9193:MSTRG.10604:MSTRG.11379:MSTRG.22994:MSTRG.4327:MSTRG.19528:MSTRG.2656:MSTRG.2731:MSTRG.23472:MSTRG.9479:MSTRG.22528:MSTRG.19546:MSTRG.7741:MSTRG.6819:MSTRG.11814:MSTRG.13758:MSTRG.23304:MSTRG.8862:MSTRG.5535:MSTRG.17691:MSTRG.4403:MSTRG.9913:MSTRG.12851:MSTRG.2271:MSTRG.7427:MSTRG.8925:MSTRG.4330:MSTRG.14931:…	znf596:alx3-2:tlx-1:nkx5-3:dbx:egr*-2:egr4-1:egr4-2:ets-3:ets-5:fli-2:fli-3:ets-1:etv4:elf1:fli-1:foxA(P):foxD1:foxD2:foxD3:foxL1:foxO:foxN(P):fezf2:gfi1:zfp541:zfhx3:hnf4:Hox3a:nerfin2-1:egr-2:lhx1-3:sall4:fir1:zfp-8:zfp236-1:zfp354:znf101:znf425:znf660:lmpt-3:smad1:smad9:mitfl-3:pdp1:nr-1:nr2e1:tlx-2:onecut-1:onecut-2:onecut-3:onecut-5:hnf6:cux-2:otx-1:otx-2:pax6-1:pax6-2:pitx:pou1:pou4-1:pou4-…	56
162	dd_Smes_g4_10	4183536	4183838	303	*	k27ac_pooled_april21_peak_1290	3.05896	Distal Intergenic	2	4176980	4181982	5003	1	MSTRG.799	MSTRG.799.12	6556	2.13621	0.221223	-0.684631	-0.668754	1	1	1	0.000455084	-0.622142	FAT4	FAT atypical cadherin 4 [Source:HGNC Symbol;Acc:HGNC:23109]	-	-	0	MSTRG.7998:MSTRG.23420:MSTRG.23513:MSTRG.5414:MSTRG.12684:MSTRG.4288:MSTRG.4289:MSTRG.22163:MSTRG.16827:MSTRG.9571:MSTRG.624:MSTRG.11386:MSTRG.22087:MSTRG.10044:MSTRG.5025:MSTRG.2221:MSTRG.19091:MSTRG.9479:MSTRG.5625:MSTRG.2171:MSTRG.10087:MSTRG.20250:MSTRG.13758:MSTRG.11405:MSTRG.20466:MSTRG.17923:MSTRG.23304:MSTRG.8862:MSTRG.5535:MSTRG.17691:MSTRG.16138:MSTRG.3741:MSTRG.7287:MSTRG.10215:MSTRG.1…	Lox5a:Lox5b:e22/23:tlx-1:nkx5-3:hinfp-1:hinfp-2:rest-1:zfp674:znf-1:znf91:znf333-1:znf652:zscan2-2:zscan2-6:dbx:coe:foxA(P):foxC1:foxC2:pou-p1:foxP:foxN(P):gcm-2:gli-1:gli-2:fezf2:gfi1:zfp541:zfhx3:prdm14:hesl-3:nkx6-2:cbt:klf-1:egr-2:lbx:lhx2-3:lmx1-1:lhx1-3:lhx3:meis-1:musculin:msx:smad1:smad9:myoD:neuroD-1:fer3l-3:nf-ya1:nf-ya2:neuroD-2:olig:otx-1:otx-2:pitx:Pbx-4:Prep:Xfin:zfp-4:zbed-1:zf-5:p…	74
163	dd_Smes_g4_10	4223585	4223807	223	*	k27ac_pooled_april21_peak_1295	2.74511	Promoter	2	4223680	4223928	249	2	MSTRG.796	MSTRG.796.1	121	1.8357	1	-0.819915	-0.360311	0	0	0			PI4K2A	phosphatidylinositol 4-kinase type 2 alpha [Source:HGNC Symbol;Acc:HGNC:30031]	-	-	0	MSTRG.7896:MSTRG.7998:MSTRG.23420:MSTRG.1217:MSTRG.4483:MSTRG.17936:MSTRG.5414:MSTRG.12684:MSTRG.4288:MSTRG.4289:MSTRG.22163:MSTRG.16827:MSTRG.9571:MSTRG.624:MSTRG.11386:MSTRG.22087:MSTRG.10044:MSTRG.5025:MSTRG.20458:MSTRG.19091:MSTRG.2484:MSTRG.1218:MSTRG.9193:MSTRG.9479:MSTRG.5625:MSTRG.2171:MSTRG.22528:MSTRG.19546:MSTRG.7741:MSTRG.22295:MSTRG.19765:MSTRG.3929:MSTRG.6819:MSTRG.11814:MSTRG.10087…	znf596:Lox5a:Lox5b:egr-5:znf362:zf-4:tlx-1:nkx5-3:hinfp-1:hinfp-2:rest-1:zfp674:znf-1:znf91:znf333-1:znf652:zscan2-2:zscan2-6:rest-2:coe:egr*-2:egr4-1:egr4-2:foxA(P):foxC1:foxC2:foxD1:foxD2:foxD3:foxF1 :foxF2:foxG:foxL1:foxO:pou-p1:foxP:foxN(P):foxQ/D:foxJ1-1:foxJ1-2:foxJ1-3:foxJ1-4:foxJ1-5:foxN2/3-1:foxN2/3-2:foxN2/3-3:foxK1:foxK2:foxK3:gli-1:gli-2:nkx6-2:nkx3-1:nkx5-2:nkx5-1:nerfin2-1:atmin:zsc…	82
164	dd_Smes_g4_10	4315852	4316406	555	*	k27ac_pooled_april21_peak_1311	2.87462	Promoter	2	4302707	4315974	13268	2	MSTRG.804	SMEST002896001.1	0	5.24737	0.226245	-0.258173	-0.078303	1	1	1	0.0428523	-0.544675	DMRTC2	DMRT like family C2 [Source:HGNC Symbol;Acc:HGNC:13911]	MSTRG.14130:MSTRG.3824:MSTRG.5349:MSTRG.6378:MSTRG.19902:MSTRG.19125:MSTRG.2385:MSTRG.22069:MSTRG.1684:SMESG000061747.1:MSTRG.22352:MSTRG.2646	nf-ya1:nf-ya2:znf181:zbtb24:ski-1:prdm1-1:zfp-3:zfp878:zbed1:zscan2-7:pou2/3-1:pou2/3-2	4	MSTRG.7896:MSTRG.7998:MSTRG.23420:MSTRG.10410:SMESG000022963.1:MSTRG.19544:MSTRG.20458:MSTRG.14008:MSTRG.2484:MSTRG.1218:MSTRG.9193:MSTRG.10604:MSTRG.5081:MSTRG.2656:MSTRG.2731:MSTRG.5625:MSTRG.2171:MSTRG.18451:MSTRG.12975:MSTRG.17474:MSTRG.22990:MSTRG.7287:MSTRG.13843:MSTRG.23578:MSTRG.20904:MSTRG.9913:MSTRG.17155:SMESG000049967.1:MSTRG.10215:MSTRG.15979:MSTRG.4069:MSTRG.17209:MSTRG.7427:MSTRG.1…	znf596:Lox5a:Lox5b:bsx:barhl1:creb3l-1:rest-2:dll-1:egr*-2:egr4-1:egr4-2:ets-3:emx1:etv4:elf1:foxC1:foxC2:foxK1:foxK2:foxK3:gli-3:nkx6-2:Hox4b:Hox1:Hox4a:Hox3a:atmin:zscan2-4:cbt:klf-1:lhx2-1:lhx2-4:lhx1-3:Mef2-1:gtf2a1:Mef2-2:meis-1:msx:sall4:fir1:zfp-8:zfp236-1:zfp354:znf101:znf425:znf660:lmpt-3:smad1:smad9:nr-1:nr2e1:tlx-2:onecut-1:onecut-2:onecut-3:onecut-5:hnf6:cux-2:phox:pitx:Xfin:zfp-4:zbe…	57
165	dd_Smes_g4_10	4418001	4418411	411	*	k27ac_pooled_april21_peak_1321	12.8752	Promoter	2	4419350	4431849	12500	1	MSTRG.808	SMEST002905001.1	-939	148.359	0.337245	-0.283875	-0.5729	1	1	1	5.61511e-06	-0.531906	ACO2	aconitase 2 [Source:HGNC Symbol;Acc:HGNC:118]	MSTRG.7998:MSTRG.23420:MSTRG.7287:MSTRG.18823:MSTRG.8332:MSTRG.11128:MSTRG.13724	Lox5a:Lox5b:nkx6-2:nr4a-1:nr4a-2:gtf2b-4:Lox4	5	MSTRG.10887:MSTRG.21923:MSTRG.9638:MSTRG.1217:MSTRG.4483:MSTRG.17936:MSTRG.5414:MSTRG.12684:MSTRG.19544:MSTRG.4288:MSTRG.4289:MSTRG.22163:MSTRG.16827:MSTRG.9571:MSTRG.624:MSTRG.11386:MSTRG.22087:MSTRG.10044:MSTRG.5025:MSTRG.20458:MSTRG.19091:MSTRG.2484:MSTRG.1218:MSTRG.9193:MSTRG.9479:MSTRG.22528:MSTRG.19546:MSTRG.7741:MSTRG.22295:MSTRG.19765:MSTRG.3929:MSTRG.6819:MSTRG.11814:MSTRG.10087:MSTRG.20…	arnt-1:barhl2-1:barhl2-2:egr-5:znf362:zf-4:tlx-1:nkx5-3:creb3l-1:hinfp-1:hinfp-2:rest-1:zfp674:znf-1:znf91:znf333-1:znf652:zscan2-2:zscan2-6:rest-2:coe:egr*-2:egr4-1:egr4-2:foxA(P):foxD1:foxD2:foxD3:foxF1 :foxF2:foxG:foxL1:foxO:pou-p1:foxP:foxN(P):foxQ/D:foxJ1-1:foxJ1-2:foxJ1-3:foxJ1-4:foxJ1-5:foxN2/3-1:foxN2/3-2:foxN2/3-3:foxK1:foxK2:foxK3:gli-1:gli-2:gli-3:hesl-3:hnf4:hesl-2:nerfin2-1:cbt:klf-3…	82
166	dd_Smes_g4_10	4463446	4463771	326	*	k27ac_pooled_april21_peak_1325	3.09046	Distal Intergenic	2	4461284	4462137	854	1	MSTRG.811	MSTRG.811.2	2162	0.919754	0.0157948	-0.554579	-0.56956	0	0	0	0.666334	-0.440576	TNFAIP8L3	TNF alpha induced protein 8 like 3 [Source:HGNC Symbol;Acc:HGNC:20620]	-	-	0	MSTRG.7896:MSTRG.23513:SMESG000022963.1:MSTRG.5414:MSTRG.12684:MSTRG.19544:MSTRG.4288:MSTRG.4289:MSTRG.22163:MSTRG.16827:MSTRG.9571:MSTRG.624:MSTRG.11386:MSTRG.22087:MSTRG.10044:MSTRG.5025:MSTRG.20458:MSTRG.2221:MSTRG.2484:MSTRG.1218:MSTRG.9193:MSTRG.9479:MSTRG.5625:MSTRG.2171:MSTRG.22528:MSTRG.19546:MSTRG.7741:MSTRG.22295:MSTRG.19765:MSTRG.3929:MSTRG.6819:MSTRG.11814:MSTRG.10087:MSTRG.20250:MSTR…	znf596:e22/23:barhl1:tlx-1:nkx5-3:creb3l-1:hinfp-1:hinfp-2:rest-1:zfp674:znf-1:znf91:znf333-1:znf652:zscan2-2:zscan2-6:rest-2:dbx:egr*-2:egr4-1:egr4-2:foxA(P):foxC1:foxC2:foxD1:foxD2:foxD3:foxF1 :foxF2:foxG:foxL1:foxO:pou-p1:foxP:foxN(P):foxQ/D:foxJ1-1:foxJ1-2:foxJ1-3:foxJ1-4:foxJ1-5:foxN2/3-1:foxN2/3-2:foxN2/3-3:foxK1:foxK2:foxK3:gcm-2:hesl-3:hnf4:nkx3-1:nkx5-2:nkx5-1:atmin:zscan2-4:klf-3:lhx1-3…	70
167	dd_Smes_g4_10	4478799	4479488	690	*	k27ac_pooled_april21_peak_1329	4.62947	Intron (MSTRG.812.1/MSTRG.812, intron 10 of 17)	2	4464480	4490838	26359	2	MSTRG.812	MSTRG.812.4	11350	9.88751	0.193723	-0.671544	-0.605002	0	0	0	0.296576	-0.247913	CDON	cell adhesion associated, oncogene regulated [Source:HGNC Symbol;Acc:HGNC:17104]	-	-	0	MSTRG.10887:MSTRG.7896:MSTRG.9597:MSTRG.6974:MSTRG.7998:MSTRG.23420:MSTRG.21923:MSTRG.9638:MSTRG.10410:SMESG000022963.1:MSTRG.12684:MSTRG.22126:SMESG000049970.1:SMESG000031904.1:MSTRG.221:MSTRG.2484:MSTRG.1218:MSTRG.9193:MSTRG.10604:MSTRG.9479:MSTRG.22528:MSTRG.19546:MSTRG.7741:MSTRG.22295:MSTRG.19765:MSTRG.3929:MSTRG.6819:MSTRG.11814:MSTRG.10087:MSTRG.20250:MSTRG.13758:MSTRG.18815:MSTRG.21195:SM…	arnt-1:znf596:pax3/7-1:alx3-2:Lox5a:Lox5b:barhl2-1:barhl2-2:bsx:barhl1:nkx5-3:zfp560-1:zscan2-5:zscan2-8:zf-6:egr*-2:egr4-1:egr4-2:ets-3:foxA(P):foxD1:foxD2:foxD3:foxF1 :foxF2:foxG:foxL1:foxO:pou-p1:foxP:foxN(P):foxQ/D:foxJ1-1:foxJ1-2:foxJ1-3:foxJ1-4:foxJ1-5:foxN2/3-1:foxN2/3-2:foxN2/3-3:nkx6-2:hesl-2:nkx3-1:nkx5-2:nkx5-1:egr-2:lbx:lhx2-1:lhx2-4:lhx1-3:lhx3:mlx:msx:nf-ya1:nf-ya2:a:nkx6-1:pou1:pou…	56
168	dd_Smes_g4_10	5237620	5237917	298	*	k27ac_pooled_april21_peak_1353	4.33053	Promoter	2	5238091	5271760	33670	1	MSTRG.835	MSTRG.835.1	-174	26.2724	0.460752	-0.203525	-0.108395	1	1	1	0.0450441	-0.387946	SLC6A5	solute carrier family 6 member 5 [Source:HGNC Symbol;Acc:HGNC:11051]	MSTRG.23309:MSTRG.9120:MSTRG.5260:MSTRG.23512:MSTRG.9977	gata123:gata456-3:ctcf:zfp-10:zfp677	2	MSTRG.10887:MSTRG.7896:MSTRG.9597:MSTRG.6974:MSTRG.10410:MSTRG.1217:MSTRG.4483:MSTRG.17936:MSTRG.5414:MSTRG.12684:MSTRG.19544:MSTRG.4288:MSTRG.4289:MSTRG.22163:MSTRG.16827:MSTRG.9571:MSTRG.624:MSTRG.11386:MSTRG.22087:MSTRG.10044:MSTRG.5025:MSTRG.20458:MSTRG.2484:MSTRG.1218:MSTRG.9193:MSTRG.9479:MSTRG.5625:MSTRG.2171:MSTRG.22528:MSTRG.19546:MSTRG.7741:MSTRG.22295:MSTRG.19765:MSTRG.3929:MSTRG.6819:…	arnt-1:znf596:pax3/7-1:alx3-2:bsx:egr-5:znf362:zf-4:tlx-1:nkx5-3:creb3l-1:hinfp-1:hinfp-2:rest-1:zfp674:znf-1:znf91:znf333-1:znf652:zscan2-2:zscan2-6:rest-2:egr*-2:egr4-1:egr4-2:foxA(P):foxC1:foxC2:foxD1:foxD2:foxD3:foxF1 :foxF2:foxG:foxL1:foxO:pou-p1:foxP:foxN(P):foxQ/D:foxJ1-1:foxJ1-2:foxJ1-3:foxJ1-4:foxJ1-5:foxN2/3-1:foxN2/3-2:foxN2/3-3:foxK1:foxK2:foxK3:gli-1:gli-2:gli-3:prdm14:hesl-3:hnf4:Ho…	92
169	dd_Smes_g4_10	5872780	5873025	246	*	k27ac_pooled_april21_peak_1366	5.55412	Promoter	2	5855532	5873747	18216	2	MSTRG.854	SMEST003090001.1	722	0.969764	0.245373	-0.208523	-0.148707	1	1	1	0.0231888	-0.824746	ATP11A	ATPase phospholipid transporting 11A [Source:HGNC Symbol;Acc:HGNC:13552]	-	-	0	MSTRG.10887:MSTRG.9597:MSTRG.7998:MSTRG.23420:MSTRG.10410:MSTRG.1217:MSTRG.4483:MSTRG.17936:MSTRG.5414:MSTRG.12684:MSTRG.19544:MSTRG.4288:MSTRG.4289:MSTRG.22163:MSTRG.16827:MSTRG.9571:MSTRG.624:MSTRG.11386:MSTRG.22087:MSTRG.10044:MSTRG.5025:MSTRG.20458:MSTRG.2221:MSTRG.14008:MSTRG.2484:MSTRG.1218:MSTRG.9193:MSTRG.10604:MSTRG.5081:MSTRG.11379:MSTRG.22994:MSTRG.4327:MSTRG.19528:MSTRG.2656:MSTRG.273…	arnt-1:pax3/7-1:Lox5a:Lox5b:bsx:egr-5:znf362:zf-4:tlx-1:nkx5-3:creb3l-1:hinfp-1:hinfp-2:rest-1:zfp674:znf-1:znf91:znf333-1:znf652:zscan2-2:zscan2-6:rest-2:dbx:dll-1:egr*-2:egr4-1:egr4-2:ets-3:emx1:ets-5:fli-2:fli-3:ets-1:etv4:elf1:fli-1:foxA(P):foxC1:foxC2:foxD1:foxD2:foxD3:foxF1 :foxF2:foxG:foxL1:foxO:pou-p1:foxP:foxN(P):foxQ/D:foxJ1-1:foxJ1-2:foxJ1-3:foxJ1-4:foxJ1-5:foxN2/3-1:foxN2/3-2:foxN2/3-…	95
170	dd_Smes_g4_10	6948134	6948334	201	*	k27ac_pooled_april21_peak_1455	3.02596	Promoter	2	6947647	6959041	11395	1	MSTRG.889	SMEST003184004.1	487	4.6878	0.225368	-0.411438	-0.62104	0	0	0	0.782304	0.0658533	NF1	neurofibromin 1 [Source:HGNC Symbol;Acc:HGNC:7765]	-	-	0	MSTRG.7896:MSTRG.7998:MSTRG.23420:MSTRG.23513:SMESG000022963.1:MSTRG.5414:MSTRG.12684:MSTRG.19544:MSTRG.19091:MSTRG.11379:MSTRG.22994:MSTRG.4327:MSTRG.23472:MSTRG.9479:MSTRG.20466:MSTRG.17923:MSTRG.23304:MSTRG.8862:MSTRG.5535:MSTRG.17691:MSTRG.7287:MSTRG.4403:MSTRG.13843:MSTRG.7792:MSTRG.6856:MSTRG.10592:MSTRG.12851:MSTRG.17848:MSTRG.9911:MSTRG.15979:MSTRG.1469:MSTRG.12466:MSTRG.7427:MSTRG.6954:M…	znf596:Lox5a:Lox5b:e22/23:barhl1:tlx-1:nkx5-3:creb3l-1:coe:ets-5:fli-2:fli-3:fli-1:foxA(P):gli-1:gli-2:fezf2:gfi1:zfp541:zfhx3:nkx6-2:hnf4:Hox4b:nkx3-1:nkx5-2:nkx5-1:nerfin2-1:isl-1:isl-2:klf-1:lhx2-3:lmx1-1:lhx1-3:msx:pdp1:nf-ya1:nf-ya2:a:nkx3-2:nr-1:nr2e1:tlx-2:neuroD-2:olig:pax2/5/8-1:phox:Xfin:zfp-4:zbed-1:zf-5:znf181:zbtb24:ski-1:zfp-7:rfx4:gtf2b-4:kdm5b:ctcf:zfp-10:zfp677:rx:scratch-like:sh…	61
171	dd_Smes_g4_10	7122774	7123069	296	*	k27ac_pooled_april21_peak_1465	4.59145	Intron (SMEST003212001.1/MSTRG.882, intron 2 of 2)	2	7131715	7131997	283	1	MSTRG.881	MSTRG.881.1	-8646	6.75735	0.257723	-0.22252	0.104953	0	0	0			CCNT1	cyclin T1 [Source:HGNC Symbol;Acc:HGNC:1599]	-	-	0	MSTRG.10887:MSTRG.6974:MSTRG.21923:MSTRG.9638:MSTRG.5414:MSTRG.12684:MSTRG.4288:MSTRG.4289:MSTRG.22163:MSTRG.16827:MSTRG.9571:MSTRG.624:MSTRG.11386:MSTRG.22087:MSTRG.10044:MSTRG.5025:MSTRG.20458:MSTRG.2484:MSTRG.1218:MSTRG.9193:MSTRG.10604:MSTRG.19528:MSTRG.2656:MSTRG.23472:MSTRG.9479:MSTRG.22990:MSTRG.23304:MSTRG.8862:MSTRG.5535:MSTRG.17691:MSTRG.16138:MSTRG.3741:MSTRG.4403:MSTRG.19305:MSTRG.779…	arnt-1:alx3-2:barhl2-1:barhl2-2:tlx-1:nkx5-3:hinfp-1:hinfp-2:rest-1:zfp674:znf-1:znf91:znf333-1:znf652:zscan2-2:zscan2-6:rest-2:egr*-2:egr4-1:egr4-2:ets-3:ets-1:etv4:fli-1:foxA(P):gli-3:fezf2:gfi1:zfp541:zfhx3:prdm14:hesl-3:hnf4:hesl-2:nkx3-1:nkx5-2:nkx5-1:nerfin2-1:cbt:klf-1:egr-2:lmx1-1:lhx1-3:meis-1:smad1:smad9:myoD:nkx2l-1:a:nr2f1:phox:zfp-7:rfx3:rfx4:rx:sp5:klf-2:sp6-9:sp8:srebp:Tbx-20:znf14…	61
172	dd_Smes_g4_10	7136613	7136917	305	*	k27ac_pooled_april21_peak_1466	5.67089	Promoter	2	7136412	7137796	1385	1	MSTRG.884	MSTRG.884.2	201	1.98717	0.0371518	-0.178417	-0.303153	0	0	0	0.20223	0.86927	-	-	MSTRG.22990:MSTRG.4755:MSTRG.9925:MSTRG.17627:MSTRG.21005:MSTRG.23477:MSTRG.18243	gli-3:Prep:six4:Tbx-1/10:Tbx-20:Tbx-2/3a:Tbx-2/3c	6	MSTRG.10887:MSTRG.7896:MSTRG.7998:MSTRG.23420:MSTRG.23513:MSTRG.5414:MSTRG.12684:MSTRG.19544:MSTRG.4288:MSTRG.4289:MSTRG.22163:MSTRG.16827:MSTRG.9571:MSTRG.624:MSTRG.11386:MSTRG.22087:MSTRG.10044:MSTRG.5025:MSTRG.2221:MSTRG.19091:MSTRG.2484:MSTRG.1218:MSTRG.9193:MSTRG.2731:MSTRG.23472:MSTRG.22528:MSTRG.19546:MSTRG.7741:MSTRG.3929:MSTRG.6819:MSTRG.11814:MSTRG.23304:MSTRG.8862:MSTRG.5535:MSTRG.1769…	arnt-1:znf596:Lox5a:Lox5b:e22/23:tlx-1:nkx5-3:creb3l-1:hinfp-1:hinfp-2:rest-1:zfp674:znf-1:znf91:znf333-1:znf652:zscan2-2:zscan2-6:dbx:coe:egr*-2:egr4-1:egr4-2:elf1:fli-1:foxD1:foxD2:foxD3:foxG:foxL1:foxO:fezf2:gfi1:zfp541:zfhx3:hesl-3:nkx6-2:hesl-2:Hox1:Hox4a:nerfin2-1:cbt:klf-1:egr-2:lhx2-3:lhx1-3:meis-1:musculin:smad1:smad9:mitfl-3:myoD:neuroD-1:fer3l-3:nf-ya1:nf-ya2:nkx3-2:nr4a-1:nr4a-2:neuro…	74
173	dd_Smes_g4_10	7287185	7287614	430	*	k27ac_pooled_april21_peak_1482	4.30841	Intron (SMEST003235001.1/MSTRG.896, intron 10 of 17)	2	7279946	7291087	11142	1	MSTRG.896	MSTRG.896.4	7239	2.12905	0.809664	-0.465763	-0.0564398	1	1	1	0.000513479	0.577874	MME	membrane metalloendopeptidase [Source:HGNC Symbol;Acc:HGNC:7154]	SMESG000022963.1:MSTRG.4288:MSTRG.4289:MSTRG.22163:MSTRG.16827:MSTRG.9571:MSTRG.624:MSTRG.11386:MSTRG.22087:MSTRG.10044:MSTRG.5025:MSTRG.20458:MSTRG.2484:MSTRG.1218:MSTRG.9193:MSTRG.20466:MSTRG.17923:MSTRG.17155:SMESG000049967.1:MSTRG.15979:MSTRG.3565:MSTRG.7049:MSTRG.19418:MSTRG.20936:MSTRG.5418:MSTRG.15672:MSTRG.6725:MSTRG.7606:MSTRG.396:MSTRG.21308:MSTRG.14621:MSTRG.4068:MSTRG.20054:MSTRG.7450…	barhl1:hinfp-1:hinfp-2:rest-1:zfp674:znf-1:znf91:znf333-1:znf652:zscan2-2:zscan2-6:rest-2:egr*-2:egr4-1:egr4-2:gli-1:gli-2:atmin:zscan2-4:klf-1:Xfin:zfp-4:zbed-1:zf-5:rfx3:rfx4:rfx7:sp5:klf-2:prdm15:zfp112:zfp408:znf486:irx-1:irx6-1:irx6-2:irx6-3:znf180:zscan2-3:twist	17	MSTRG.7896:MSTRG.7998:MSTRG.23420:MSTRG.23513:MSTRG.1217:MSTRG.4483:MSTRG.17936:MSTRG.5414:MSTRG.19544:MSTRG.14008:MSTRG.19091:MSTRG.9479:MSTRG.10087:MSTRG.20250:MSTRG.11405:MSTRG.22990:MSTRG.7287:MSTRG.4403:MSTRG.7792:MSTRG.6856:MSTRG.9913:MSTRG.17848:MSTRG.9911:MSTRG.10177:MSTRG.7427:MSTRG.20979:MSTRG.1897:MSTRG.372:MSTRG.6445:MSTRG.8925:MSTRG.4330:MSTRG.14931:MSTRG.12358:MSTRG.19417:MSTRG.432:…	znf596:Lox5a:Lox5b:e22/23:egr-5:znf362:zf-4:tlx-1:creb3l-1:dll-1:coe:foxA(P):pou-p1:foxP:gcm-2:gli-3:nkx6-2:hnf4:nkx3-1:nkx5-2:Hox3a:isl-1:isl-2:klf-3:lhx1-3:lhx3:meis-1:mlx:musculin:sall4:fir1:zfp-8:zfp236-1:zfp354:znf101:znf425:znf660:lmpt-3:myoD:neuroD-1:fer3l-3:nf-ya1:nf-ya2:nkx2l-1:nkx3-2:nkx6-1:hr51:neuroD-2:olig:otx-1:otx-2:phox:pou4-1:pou4-2:zfp-7:kdm5b:ctcf:zfp-10:zfp677:scratch-like:sma…	65
174	dd_Smes_g4_10	7288030	7288305	276	*	k27ac_pooled_april21_peak_1483	9.34676	Intron (SMEST003235001.1/MSTRG.896, intron 10 of 17)	2	7279946	7291087	11142	1	MSTRG.896	MSTRG.896.4	8084	2.12905	0.809664	-0.638341	-0.255389	1	1	1	0.000513479	0.577874	MME	membrane metalloendopeptidase [Source:HGNC Symbol;Acc:HGNC:7154]	SMESG000022963.1:MSTRG.4288:MSTRG.4289:MSTRG.22163:MSTRG.16827:MSTRG.9571:MSTRG.624:MSTRG.11386:MSTRG.22087:MSTRG.10044:MSTRG.5025:MSTRG.20458:MSTRG.2484:MSTRG.1218:MSTRG.9193:MSTRG.19528:MSTRG.2656:MSTRG.2731:MSTRG.20466:MSTRG.17923:MSTRG.23304:MSTRG.8862:MSTRG.5535:MSTRG.17691:MSTRG.16138:MSTRG.17155:SMESG000049967.1:MSTRG.15979:MSTRG.8925:MSTRG.4330:MSTRG.14931:MSTRG.12358:MSTRG.19417:MSTRG.43…	barhl1:hinfp-1:hinfp-2:rest-1:zfp674:znf-1:znf91:znf333-1:znf652:zscan2-2:zscan2-6:rest-2:egr*-2:egr4-1:egr4-2:ets-1:etv4:elf1:gli-1:gli-2:fezf2:gfi1:zfp541:zfhx3:prdm14:atmin:zscan2-4:klf-1:sall4:fir1:zfp-8:zfp236-1:zfp354:znf101:znf425:znf660:lmpt-3:nr2f1:nr4a-1:nr4a-2:Xfin:zfp-4:zbed-1:zf-5:zfp-7:rfx3:rfx4:rfx7:gtf2b-4:sp5:klf-2:yy2:zbed8:prdm15:zfp112:zfp408:znf486:irx-1:irx6-1:irx6-2:irx6-3:…	30	MSTRG.7896:MSTRG.9597:MSTRG.7998:MSTRG.23420:MSTRG.23513:MSTRG.1217:MSTRG.4483:MSTRG.17936:MSTRG.5414:MSTRG.19544:MSTRG.2221:MSTRG.19091:MSTRG.11379:MSTRG.22994:MSTRG.4327:MSTRG.23472:MSTRG.10087:MSTRG.20250:MSTRG.22990:MSTRG.7287:MSTRG.4403:MSTRG.23578:MSTRG.20904:MSTRG.9913:MSTRG.17848:MSTRG.9911:MSTRG.10177:MSTRG.2271:MSTRG.7427:MSTRG.20979:MSTRG.1897:MSTRG.372:MSTRG.6445:MSTRG.19581:MSTRG.188…	znf596:pax3/7-1:Lox5a:Lox5b:e22/23:egr-5:znf362:zf-4:tlx-1:creb3l-1:dbx:coe:ets-5:fli-2:fli-3:fli-1:pou-p1:foxP:gli-3:nkx6-2:hnf4:Hox1:Hox4a:Hox3a:isl-1:isl-2:klf-3:egr-2:lhx1-3:lhx3:meis-1:mlx:musculin:neuroD-1:fer3l-3:nf-ya1:nf-ya2:nkx2l-1:nkx3-2:hr51:neuroD-2:olig:pou4-1:pou4-2:kdm5b:scratch-like:srebp:six3:six6-2:six6-3:six4:tal:ptf-4:ptf-5:znf207:zeb-1:Lox4:alx4:hb-1:hb-2:meis-2:osr-1:osr-2:…	50
175	dd_Smes_g4_10	7437437	7437776	340	*	k27ac_pooled_april21_peak_1501	9.03825	Intron (MSTRG.898.1/MSTRG.898, intron 2 of 2)	2	7409435	7439249	29815	1	MSTRG.898	MSTRG.898.3	28002	3.53301	0.219292	-0.371311	-0.353084	0	0	0	0.136895	0.966192	CPTP	ceramide-1-phosphate transfer protein [Source:HGNC Symbol;Acc:HGNC:28116]	-	-	0	MSTRG.10887:MSTRG.7896:MSTRG.6974:MSTRG.7998:MSTRG.23420:MSTRG.21923:MSTRG.9638:SMESG000022963.1:MSTRG.5414:MSTRG.12684:MSTRG.22528:MSTRG.19546:MSTRG.7741:MSTRG.22295:MSTRG.19765:MSTRG.3929:MSTRG.6819:MSTRG.11814:MSTRG.10087:MSTRG.20250:MSTRG.13758:MSTRG.23309:MSTRG.9120:MSTRG.20466:MSTRG.17923:MSTRG.12700:MSTRG.8018:MSTRG.11935:MSTRG.16138:MSTRG.7287:MSTRG.4403:MSTRG.13843:MSTRG.10592:MSTRG.1715…	arnt-1:znf596:alx3-2:Lox5a:Lox5b:barhl2-1:barhl2-2:barhl1:tlx-1:nkx5-3:foxD1:foxD2:foxD3:foxF1 :foxF2:foxG:foxL1:foxO:pou-p1:foxP:foxN(P):gata123:gata456-3:gli-1:gli-2:gata456-1:gata456-2:gata456-4:prdm14:nkx6-2:hnf4:Hox4b:nkx5-1:atmin:zscan2-4:lhx2-3:lmx1-1:lhx1-3:meis-1:msx:smad1:smad9:mitfl-3:nr4a-1:nr4a-2:Prep:a:rfx3:rfx4:rfx7:kdm5b:ctcf:zfp-10:zfp677:shox:smad4-1:da:uncx:yy2:zbed8:znf333-2:z…	60
176	dd_Smes_g4_10	9099638	9099800	163	*	k27ac_pooled_april21_peak_1569	3.52567	Distal Intergenic	2	9100016	9107832	7817	2	MSTRG.946	SMEST003425002.1	8032	25.5646	0.346841	-0.535955	-0.299357	1	1	1	0.00729068	-0.335906	SHF	Src homology 2 domain containing F [Source:HGNC Symbol;Acc:HGNC:25116]	MSTRG.7450:MSTRG.5557:MSTRG.572:MSTRG.18286	irx-1:irx6-1:irx6-2:irx6-3	1	MSTRG.7896:MSTRG.9597:MSTRG.6974:MSTRG.7998:MSTRG.23420:MSTRG.21923:MSTRG.9638:MSTRG.5414:MSTRG.19544:MSTRG.4288:MSTRG.4289:MSTRG.22163:MSTRG.16827:MSTRG.9571:MSTRG.624:MSTRG.11386:MSTRG.22087:MSTRG.10044:MSTRG.5025:MSTRG.20458:MSTRG.2221:MSTRG.19091:MSTRG.2484:MSTRG.1218:MSTRG.9193:MSTRG.10604:MSTRG.11379:MSTRG.22994:MSTRG.4327:MSTRG.19528:MSTRG.2656:MSTRG.2731:MSTRG.23472:MSTRG.22528:MSTRG.1954…	znf596:pax3/7-1:alx3-2:Lox5a:Lox5b:barhl2-1:barhl2-2:tlx-1:creb3l-1:hinfp-1:hinfp-2:rest-1:zfp674:znf-1:znf91:znf333-1:znf652:zscan2-2:zscan2-6:rest-2:dbx:coe:egr*-2:egr4-1:egr4-2:ets-3:ets-5:fli-2:fli-3:ets-1:etv4:elf1:fli-1:foxD1:foxD2:foxD3:foxF1 :foxF2:foxG:foxL1:foxO:gata123:gata456-3:gli-1:gli-2:gli-3:gata456-1:gata456-2:gata456-4:fezf2:gfi1:zfp541:zfhx3:prdm14:nkx6-2:hnf4:Hox4b:hesl-2:Hox3…	92
177	dd_Smes_g4_10	9329867	9330080	214	*	k27ac_pooled_april21_peak_1571	4.04211	Distal Intergenic	2	9330393	9331609	1217	2	MSTRG.953	MSTRG.953.1	1529	314.035	0.433318	0.314898	0.058922	0	0	0	0.0862234	-0.229417	PARK7	Parkinsonism associated deglycase [Source:HGNC Symbol;Acc:HGNC:16369]	MSTRG.10604:MSTRG.1897:MSTRG.23026	ets-3:meis-1:meis-2	3	MSTRG.1217:MSTRG.4483:MSTRG.17936:MSTRG.12684:MSTRG.4288:MSTRG.4289:MSTRG.22163:MSTRG.16827:MSTRG.9571:MSTRG.624:MSTRG.11386:MSTRG.22087:MSTRG.10044:MSTRG.5025:MSTRG.20458:MSTRG.2656:MSTRG.5625:MSTRG.2171:MSTRG.22528:MSTRG.19546:MSTRG.7741:MSTRG.3929:MSTRG.6819:MSTRG.11814:MSTRG.10087:MSTRG.20250:MSTRG.13758:MSTRG.20466:MSTRG.17923:MSTRG.22990:MSTRG.4403:MSTRG.12851:MSTRG.17155:SMESG000049967.1:M…	egr-5:znf362:zf-4:nkx5-3:hinfp-1:hinfp-2:rest-1:zfp674:znf-1:znf91:znf333-1:znf652:zscan2-2:zscan2-6:rest-2:etv4:foxC1:foxC2:foxD1:foxD2:foxD3:foxG:foxL1:foxO:pou-p1:foxP:foxN(P):gli-1:gli-2:gli-3:hnf4:nerfin2-1:atmin:zscan2-4:cbt:klf-3:klf-1:lhx2-3:lmx1-1:lhx1-3:lhx3:mlx:msx:smad1:smad9:mitfl-3:myoD:nkx3-2:nr2f1:nr4a-1:nr4a-2:onecut-1:onecut-2:onecut-3:onecut-5:hnf6:cux-2:pax2/5/8-1:pax6-1:pax6-…	73
178	dd_Smes_g4_100	107221	107586	366	*	k27ac_pooled_april21_peak_1581	1.93808	Promoter	3	107966	109566	1601	1	MSTRG.975	SMEST000088001.1	-380	0.200804	0.0474781	-0.480222	-0.511361	0	0	0			SVOPL	SVOP like [Source:HGNC Symbol;Acc:HGNC:27034]	MSTRG.11214	myoD	1	MSTRG.7896:MSTRG.7998:MSTRG.23420:MSTRG.5414:MSTRG.19544:MSTRG.22126:SMESG000049970.1:SMESG000031904.1:MSTRG.221:MSTRG.2221:MSTRG.2484:MSTRG.1218:MSTRG.9193:MSTRG.10604:MSTRG.2731:MSTRG.22295:MSTRG.19765:MSTRG.18451:MSTRG.12975:MSTRG.17474:MSTRG.22990:MSTRG.23304:MSTRG.8862:MSTRG.5535:MSTRG.17691:MSTRG.3741:MSTRG.7287:MSTRG.12930:MSTRG.12309:MSTRG.2947:MSTRG.18714:MSTRG.8925:MSTRG.4330:MSTRG.1493…	znf596:Lox5a:Lox5b:tlx-1:creb3l-1:zfp560-1:zscan2-5:zscan2-8:zf-6:dbx:egr*-2:egr4-1:egr4-2:ets-3:elf1:foxF1 :foxF2:foxK1:foxK2:foxK3:gli-3:fezf2:gfi1:zfp541:zfhx3:hesl-3:nkx6-2:Mef2-1:gtf2a1:Mef2-2:meox:sall4:fir1:zfp-8:zfp236-1:zfp354:znf101:znf425:znf660:lmpt-3:mitfl-3:nf-ya1:nf-ya2:nkx6-1:nr4a-1:nr4a-2:onecut-1:onecut-2:onecut-3:onecut-5:hnf6:cux-2:otx-1:otx-2:pax6-1:pax6-2:pitx:Xfin:zfp-4:zbe…	41
179	dd_Smes_g4_100	497898	498098	201	*	k27ac_pooled_april21_peak_1585	3.50766	Promoter	3	497164	497535	372	2	MSTRG.994	MSTRG.994.1	-363	22.2992	0.238783	-0.212672	-0.0706635	0	0	0			CHRNA7	cholinergic receptor nicotinic alpha 7 subunit [Source:HGNC Symbol;Acc:HGNC:1960]	-	-	0	MSTRG.10887:MSTRG.7998:MSTRG.23420:MSTRG.1217:MSTRG.4483:MSTRG.17936:MSTRG.12684:MSTRG.4288:MSTRG.4289:MSTRG.22163:MSTRG.16827:MSTRG.9571:MSTRG.624:MSTRG.11386:MSTRG.22087:MSTRG.10044:MSTRG.5025:MSTRG.2221:MSTRG.14008:MSTRG.2484:MSTRG.1218:MSTRG.9193:MSTRG.19528:MSTRG.2656:MSTRG.2731:MSTRG.5625:MSTRG.2171:MSTRG.10087:MSTRG.20250:MSTRG.18815:MSTRG.21195:SMESG000072873.1:MSTRG.19883:MSTRG.3843:MSTR…	arnt-1:Lox5a:Lox5b:egr-5:znf362:zf-4:nkx5-3:hinfp-1:hinfp-2:rest-1:zfp674:znf-1:znf91:znf333-1:znf652:zscan2-2:zscan2-6:dbx:dll-1:egr*-2:egr4-1:egr4-2:ets-1:etv4:elf1:foxC1:foxC2:pou-p1:foxP:foxQ/D:foxJ1-1:foxJ1-2:foxJ1-3:foxJ1-4:foxJ1-5:foxN2/3-1:foxN2/3-2:foxN2/3-3:gcm-2:gli-3:prdm14:nkx6-2:hnf4:atmin:zscan2-4:lmx1-1:lhx1-3:meis-1:otx-1:otx-2:pax2/5/8-1:pitx:Pbx-4:Prep:Xfin:zfp-4:zbed-1:zf-5:po…	55
180	dd_Smes_g4_100	2216484	2217061	578	*	k27ac_pooled_april21_peak_1615	5.89106	Promoter	3	2217143	2251411	34269	1	MSTRG.1046	MSTRG.1046.4	-82	3.20269	0.133762	-0.210388	-0.0865372	1	1	1	0.0477896	-0.403936	DAB2IP	DAB2 interacting protein [Source:HGNC Symbol;Acc:HGNC:17294]	-	-	0	MSTRG.6974:MSTRG.7998:MSTRG.23420:MSTRG.12684:MSTRG.4288:MSTRG.4289:MSTRG.22163:MSTRG.16827:MSTRG.9571:MSTRG.624:MSTRG.11386:MSTRG.22087:MSTRG.10044:MSTRG.5025:MSTRG.20458:MSTRG.2221:MSTRG.2484:MSTRG.1218:MSTRG.9193:MSTRG.11405:MSTRG.12700:MSTRG.8018:MSTRG.11935:MSTRG.16138:MSTRG.7287:MSTRG.23578:MSTRG.20904:MSTRG.7427:MSTRG.4208:MSTRG.16892:MSTRG.11214:MSTRG.14130:MSTRG.3824:a:MSTRG.764:MSTRG.18…	alx3-2:Lox5a:Lox5b:nkx5-3:hinfp-1:hinfp-2:rest-1:zfp674:znf-1:znf91:znf333-1:znf652:zscan2-2:zscan2-6:rest-2:dbx:egr*-2:egr4-1:egr4-2:gcm-2:gata456-1:gata456-2:gata456-4:prdm14:nkx6-2:Hox1:Hox4a:lhx1-3:smad1:smad9:myoD:nf-ya1:nf-ya2:a:nkx6-1:nr4a-1:nr4a-2:pax2/5/8-1:pitx:pou4-1:pou4-2:znf181:zbtb24:ski-1:zfp-7:rfx3:rfx7:gtf2b-4:ctcf:zfp-10:zfp677:smad4-1:sp5:six4:tal:ptf-4:Tbx-2/3a:Tbx-2/3c:da:ap…	52
181	dd_Smes_g4_100	2225077	2225412	336	*	k27ac_pooled_april21_peak_1617	2.34745	Intron (SMEST000171002.1/MSTRG.1046, intron 4 of 16)	3	2226939	2251411	24473	1	MSTRG.1046	MSTRG.1046.11	-1527	3.20269	0.133762	-0.43185	-0.65615	1	1	1	0.0477896	-0.403936	DAB2IP	DAB2 interacting protein [Source:HGNC Symbol;Acc:HGNC:17294]	SMESG000022963.1:MSTRG.14008:MSTRG.3565:MSTRG.7049:MSTRG.19418:MSTRG.20936:MSTRG.10612	barhl1:dll-1:Xfin:zfp-4:zbed-1:zf-5:rx	4	MSTRG.10887:MSTRG.7998:MSTRG.23420:MSTRG.23513:MSTRG.10410:MSTRG.12684:MSTRG.19544:MSTRG.4288:MSTRG.4289:MSTRG.22163:MSTRG.16827:MSTRG.9571:MSTRG.624:MSTRG.11386:MSTRG.22087:MSTRG.10044:MSTRG.5025:MSTRG.20458:MSTRG.22126:SMESG000049970.1:SMESG000031904.1:MSTRG.221:MSTRG.2221:MSTRG.10604:MSTRG.5081:MSTRG.2656:MSTRG.9479:MSTRG.11405:MSTRG.23304:MSTRG.8862:MSTRG.5535:MSTRG.17691:MSTRG.16138:MSTRG.72…	arnt-1:Lox5a:Lox5b:e22/23:bsx:nkx5-3:creb3l-1:hinfp-1:hinfp-2:rest-1:zfp674:znf-1:znf91:znf333-1:znf652:zscan2-2:zscan2-6:rest-2:zfp560-1:zscan2-5:zscan2-8:zf-6:dbx:ets-3:emx1:etv4:foxA(P):gcm-2:fezf2:gfi1:zfp541:zfhx3:prdm14:nkx6-2:nerfin2-1:egr-2:lhx2-1:lhx2-4:lhx1-3:meis-1:meox:musculin:msx:myoD:neuroD-1:fer3l-3:pdp1:nf-ya1:nf-ya2:nr4a-1:nr4a-2:hr51:neuroD-2:olig:otx-1:otx-2:pax6-1:pax6-2:Pbx-…	61
182	dd_Smes_g4_100	2233988	2234305	318	*	k27ac_pooled_april21_peak_1618	3.81571	Intron (SMEST000171002.1/MSTRG.1046, intron 9 of 16)	3	2235888	2238469	2582	1	MSTRG.1046	MSTRG.1046.12	-1583	3.20269	0.133762	-0.438997	-0.230292	1	1	1	0.0477896	-0.403936	DAB2IP	DAB2 interacting protein [Source:HGNC Symbol;Acc:HGNC:17294]	-	-	0	MSTRG.10887:MSTRG.7998:MSTRG.23420:MSTRG.1217:MSTRG.4483:MSTRG.17936:MSTRG.19544:MSTRG.4288:MSTRG.4289:MSTRG.22163:MSTRG.16827:MSTRG.9571:MSTRG.624:MSTRG.11386:MSTRG.22087:MSTRG.10044:MSTRG.5025:MSTRG.20458:MSTRG.2221:MSTRG.19091:MSTRG.2484:MSTRG.1218:MSTRG.9193:MSTRG.10604:MSTRG.2731:MSTRG.9479:MSTRG.11405:MSTRG.20466:MSTRG.17923:MSTRG.22990:MSTRG.23304:MSTRG.8862:MSTRG.5535:MSTRG.17691:MSTRG.16…	arnt-1:Lox5a:Lox5b:egr-5:znf362:zf-4:creb3l-1:hinfp-1:hinfp-2:rest-1:zfp674:znf-1:znf91:znf333-1:znf652:zscan2-2:zscan2-6:rest-2:dbx:coe:egr*-2:egr4-1:egr4-2:ets-3:elf1:foxA(P):gcm-2:gli-1:gli-2:gli-3:fezf2:gfi1:zfp541:zfhx3:prdm14:nkx6-2:hnf4:Hox4b:atmin:zscan2-4:cbt:klf-3:klf-1:lhx1-3:Mef2-2:musculin:sall4:fir1:zfp-8:zfp236-1:zfp354:znf101:znf425:znf660:lmpt-3:smad1:smad9:myoD:nf-ya1:nf-ya2:nkx…	65
183	dd_Smes_g4_100	2234579	2234730	152	*	k27ac_pooled_april21_peak_1618	3.81571	Intron (SMEST000171002.1/MSTRG.1046, intron 9 of 16)	3	2235888	2238469	2582	1	MSTRG.1046	MSTRG.1046.12	-1158	3.20269	0.133762	-0.438997	-0.230292	1	1	1	0.0477896	-0.403936	DAB2IP	DAB2 interacting protein [Source:HGNC Symbol;Acc:HGNC:17294]	-	-	0	MSTRG.10887:MSTRG.7998:MSTRG.23420:MSTRG.1217:MSTRG.4483:MSTRG.17936:MSTRG.5414:MSTRG.19544:MSTRG.4288:MSTRG.4289:MSTRG.22163:MSTRG.16827:MSTRG.9571:MSTRG.624:MSTRG.11386:MSTRG.22087:MSTRG.10044:MSTRG.5025:MSTRG.20458:MSTRG.2221:MSTRG.19091:MSTRG.2484:MSTRG.1218:MSTRG.9193:MSTRG.10604:MSTRG.11379:MSTRG.22994:MSTRG.4327:MSTRG.19528:MSTRG.2731:MSTRG.23472:MSTRG.9479:MSTRG.11405:MSTRG.22990:MSTRG.23…	arnt-1:Lox5a:Lox5b:egr-5:znf362:zf-4:tlx-1:creb3l-1:hinfp-1:hinfp-2:rest-1:zfp674:znf-1:znf91:znf333-1:znf652:zscan2-2:zscan2-6:rest-2:dbx:coe:egr*-2:egr4-1:egr4-2:ets-3:ets-5:fli-2:fli-3:ets-1:elf1:fli-1:foxA(P):gcm-2:gli-3:fezf2:gfi1:zfp541:zfhx3:prdm14:nkx6-2:hnf4:isl-1:isl-2:atmin:zscan2-4:cbt:klf-3:klf-1:egr-2:Mef2-1:gtf2a1:Mef2-2:musculin:sall4:fir1:zfp-8:zfp236-1:zfp354:znf101:znf425:znf66…	75
184	dd_Smes_g4_100	2234047	2234305	259	*	k27ac_pooled_april21_peak_1619	2.56119	Intron (SMEST000171002.1/MSTRG.1046, intron 9 of 16)	3	2235888	2238469	2582	1	MSTRG.1046	MSTRG.1046.12	-1583	3.20269	0.133762	-0.462788	-0.388934	1	1	1	0.0477896	-0.403936	DAB2IP	DAB2 interacting protein [Source:HGNC Symbol;Acc:HGNC:17294]	-	-	0	MSTRG.10887:MSTRG.7998:MSTRG.23420:MSTRG.1217:MSTRG.4483:MSTRG.17936:MSTRG.19544:MSTRG.4288:MSTRG.4289:MSTRG.22163:MSTRG.16827:MSTRG.9571:MSTRG.624:MSTRG.11386:MSTRG.22087:MSTRG.10044:MSTRG.5025:MSTRG.20458:MSTRG.2221:MSTRG.19091:MSTRG.2484:MSTRG.1218:MSTRG.9193:MSTRG.10604:MSTRG.2731:MSTRG.9479:MSTRG.11405:MSTRG.20466:MSTRG.17923:MSTRG.22990:MSTRG.23304:MSTRG.8862:MSTRG.5535:MSTRG.17691:MSTRG.16…	arnt-1:Lox5a:Lox5b:egr-5:znf362:zf-4:creb3l-1:hinfp-1:hinfp-2:rest-1:zfp674:znf-1:znf91:znf333-1:znf652:zscan2-2:zscan2-6:rest-2:dbx:coe:egr*-2:egr4-1:egr4-2:ets-3:elf1:foxA(P):gcm-2:gli-1:gli-2:gli-3:fezf2:gfi1:zfp541:zfhx3:prdm14:nkx6-2:hnf4:Hox4b:atmin:zscan2-4:cbt:klf-3:klf-1:lhx1-3:Mef2-2:musculin:sall4:fir1:zfp-8:zfp236-1:zfp354:znf101:znf425:znf660:lmpt-3:smad1:smad9:myoD:nf-ya1:nf-ya2:nkx…	67
185	dd_Smes_g4_100	2234579	2235047	469	*	k27ac_pooled_april21_peak_1619	2.56119	Promoter	3	2235888	2238469	2582	1	MSTRG.1046	MSTRG.1046.12	-841	3.20269	0.133762	-0.462788	-0.388934	1	1	1	0.0477896	-0.403936	DAB2IP	DAB2 interacting protein [Source:HGNC Symbol;Acc:HGNC:17294]	-	-	0	MSTRG.10887:MSTRG.7998:MSTRG.23420:MSTRG.1217:MSTRG.4483:MSTRG.17936:MSTRG.5414:MSTRG.19544:MSTRG.4288:MSTRG.4289:MSTRG.22163:MSTRG.16827:MSTRG.9571:MSTRG.624:MSTRG.11386:MSTRG.22087:MSTRG.10044:MSTRG.5025:MSTRG.20458:MSTRG.2221:MSTRG.19091:MSTRG.2484:MSTRG.1218:MSTRG.9193:MSTRG.10604:MSTRG.11379:MSTRG.22994:MSTRG.4327:MSTRG.19528:MSTRG.2731:MSTRG.23472:MSTRG.9479:MSTRG.11405:MSTRG.22990:MSTRG.23…	arnt-1:Lox5a:Lox5b:egr-5:znf362:zf-4:tlx-1:creb3l-1:hinfp-1:hinfp-2:rest-1:zfp674:znf-1:znf91:znf333-1:znf652:zscan2-2:zscan2-6:rest-2:dbx:coe:egr*-2:egr4-1:egr4-2:ets-3:ets-5:fli-2:fli-3:ets-1:elf1:fli-1:foxA(P):gcm-2:gli-3:fezf2:gfi1:zfp541:zfhx3:prdm14:nkx6-2:hnf4:isl-1:isl-2:atmin:zscan2-4:cbt:klf-3:klf-1:egr-2:Mef2-1:gtf2a1:Mef2-2:musculin:sall4:fir1:zfp-8:zfp236-1:zfp354:znf101:znf425:znf66…	75
186	dd_Smes_g4_100	2246800	2247032	233	*	k27ac_pooled_april21_peak_1620	4.40562	Intron (SMEST000171002.1/MSTRG.1046, intron 15 of 16)	3	2235888	2238469	2582	1	MSTRG.1046	MSTRG.1046.12	10912	3.20269	0.133762	-0.452664	-0.467367	1	1	1	0.0477896	-0.403936	DAB2IP	DAB2 interacting protein [Source:HGNC Symbol;Acc:HGNC:17294]	-	-	0	MSTRG.10887:MSTRG.7998:MSTRG.23420:MSTRG.21923:MSTRG.9638:MSTRG.23513:SMESG000022963.1:MSTRG.5414:MSTRG.12684:MSTRG.4288:MSTRG.4289:MSTRG.22163:MSTRG.16827:MSTRG.9571:MSTRG.624:MSTRG.11386:MSTRG.22087:MSTRG.10044:MSTRG.5025:MSTRG.20458:MSTRG.22126:SMESG000049970.1:SMESG000031904.1:MSTRG.221:MSTRG.2221:MSTRG.2484:MSTRG.1218:MSTRG.9193:MSTRG.19528:MSTRG.5625:MSTRG.2171:MSTRG.10087:MSTRG.20250:MSTRG…	arnt-1:Lox5a:Lox5b:barhl2-1:barhl2-2:e22/23:barhl1:tlx-1:nkx5-3:hinfp-1:hinfp-2:rest-1:zfp674:znf-1:znf91:znf333-1:znf652:zscan2-2:zscan2-6:rest-2:zfp560-1:zscan2-5:zscan2-8:zf-6:dbx:egr*-2:egr4-1:egr4-2:ets-1:foxC1:foxC2:pou-p1:foxP:foxQ/D:foxJ1-1:foxJ1-2:foxJ1-3:foxJ1-4:foxJ1-5:foxN2/3-1:foxN2/3-2:foxN2/3-3:foxK1:foxK2:foxK3:gata123:gata456-3:gcm-2:gli-1:gli-2:gli-3:gata456-1:gata456-2:gata456-…	82
187	dd_Smes_g4_101	244716	244926	211	*	k27ac_pooled_april21_peak_1633	3.55096	Intron (MSTRG.1058.1/MSTRG.1058, intron 3 of 3)	4	235247	261786	26540	2	MSTRG.1058	MSTRG.1058.1	16860	1.81261	0.188392	-0.288629	-0.221482	0	0	0	0.352324	-0.275794	ARHGAP20	Rho GTPase activating protein 20 [Source:HGNC Symbol;Acc:HGNC:18357]	MSTRG.2221:MSTRG.11379:MSTRG.22994:MSTRG.4327:MSTRG.19528:MSTRG.2656:MSTRG.2731:MSTRG.23472:MSTRG.10215:MSTRG.10177:MSTRG.11197:MSTRG.22732:MSTRG.308:MSTRG.1201:MSTRG.8933:MSTRG.7450:MSTRG.5557:MSTRG.572:MSTRG.18286:MSTRG.4514:MSTRG.3909:MSTRG.17449:MSTRG.15548	dbx:ets-5:fli-2:fli-3:ets-1:etv4:elf1:fli-1:cbt:klf-3:egr-1:ovo-1:prdm13:gl:znf341:irx-1:irx6-1:irx6-2:irx6-3:ikzf1:zfp362:znf180:zscan2-3	12	MSTRG.1217:MSTRG.4483:MSTRG.17936:MSTRG.12684:MSTRG.20458:MSTRG.22126:SMESG000049970.1:SMESG000031904.1:MSTRG.221:MSTRG.14008:MSTRG.19091:MSTRG.2484:MSTRG.1218:MSTRG.9193:MSTRG.5081:MSTRG.22295:MSTRG.19765:MSTRG.10087:MSTRG.20250:MSTRG.13758:MSTRG.18451:MSTRG.12975:MSTRG.17474:MSTRG.11405:MSTRG.20466:MSTRG.17923:MSTRG.4403:MSTRG.13843:MSTRG.19305:MSTRG.7792:MSTRG.6856:MSTRG.10592:MSTRG.12851:MSTR…	egr-5:znf362:zf-4:nkx5-3:rest-2:zfp560-1:zscan2-5:zscan2-8:zf-6:dll-1:coe:egr*-2:egr4-1:egr4-2:emx1:foxF1 :foxF2:pou-p1:foxP:foxN(P):foxK1:foxK2:foxK3:gcm-2:gli-1:gli-2:hnf4:Hox4b:hesl-2:nkx3-1:nkx5-2:nkx5-1:nerfin2-1:klf-1:egr-2:lhx2-1:lhx2-4:lhx2-3:lmx1-2:lmx1-1:lhx1-1:lhx1-4:lhx1-3:lhx3:Mef2-1:gtf2a1:Mef2-2:meox:msx:smad1:smad9:pdp1:nf-ya1:nf-ya2:nkx2l-1:a:onecut-1:onecut-2:onecut-3:onecut-5:h…	71
188	dd_Smes_g4_101	461424	461511	88	*	k27ac_pooled_april21_peak_1644	12.5196	Promoter	4	461739	557434	95696	1	MSTRG.1088	MSTRG.1088.20	-228	8.28282	0.301607	0.25269	-0.0584146	1	0	1	7.90056e-10	-0.755867	CACNA1S	calcium voltage-gated channel subunit alpha1 S [Source:HGNC Symbol;Acc:HGNC:1397]	MSTRG.19544:MSTRG.2484:MSTRG.1218:MSTRG.9193:MSTRG.11405:MSTRG.12851:MSTRG.4208:MSTRG.16892:MSTRG.11214:MSTRG.5260:MSTRG.23512:MSTRG.9977:MSTRG.396:MSTRG.15425:MSTRG.19918:MSTRG.21518:MSTRG.11197:MSTRG.22732:MSTRG.308:MSTRG.1201:MSTRG.8933:MSTRG.8960	creb3l-1:egr*-2:egr4-1:egr4-2:gcm-2:nerfin2-1:smad1:smad9:myoD:ctcf:zfp-10:zfp677:klf-2:sp6-9:sp8:znf207:egr-1:ovo-1:prdm13:gl:znf341:rxra	12	MSTRG.21923:MSTRG.9638:MSTRG.12684:MSTRG.4288:MSTRG.4289:MSTRG.22163:MSTRG.16827:MSTRG.9571:MSTRG.624:MSTRG.11386:MSTRG.22087:MSTRG.10044:MSTRG.5025:MSTRG.20458:MSTRG.2221:MSTRG.5625:MSTRG.2171:MSTRG.20466:MSTRG.17923:MSTRG.22990:MSTRG.16138:MSTRG.7792:MSTRG.6856:MSTRG.17848:MSTRG.9911:MSTRG.17155:SMESG000049967.1:MSTRG.2271:MSTRG.1469:MSTRG.20979:MSTRG.18714:MSTRG.14130:MSTRG.3824:MSTRG.6003:a:M…	barhl2-1:barhl2-2:nkx5-3:hinfp-1:hinfp-2:rest-1:zfp674:znf-1:znf91:znf333-1:znf652:zscan2-2:zscan2-6:rest-2:dbx:foxC1:foxC2:gli-1:gli-2:gli-3:prdm14:nkx3-1:nkx5-2:isl-1:isl-2:atmin:zscan2-4:egr-2:lhx2-3:lhx3:meox:nf-ya1:nf-ya2:nkx2l-1:a:nkx3-2:hr51:onecut-1:onecut-2:onecut-3:onecut-5:hnf6:cux-2:otx-1:otx-2:pax2/5/8-1:pitx:Xfin:zfp-4:zbed-1:zf-5:znf181:zbtb24:ski-1:zfp-7:rfx4:gtf2b-4:kdm5b:scratch…	50
189	dd_Smes_g4_101	533063	533386	324	*	k27ac_pooled_april21_peak_1647	3.24545	Intron (SMEST000524007.1/MSTRG.1088, intron 38 of 39)	4	538094	557434	19341	1	MSTRG.1088	SMEST000524022.1	-4708	8.28282	0.301607	-0.266683	-0.0847527	1	1	1	7.90056e-10	-0.755867	CACNA1S	calcium voltage-gated channel subunit alpha1 S [Source:HGNC Symbol;Acc:HGNC:1397]	-	-	0	MSTRG.7896:MSTRG.7998:MSTRG.23420:MSTRG.2484:MSTRG.1218:MSTRG.9193:MSTRG.10604:MSTRG.11379:MSTRG.22994:MSTRG.4327:MSTRG.19528:MSTRG.2656:MSTRG.2731:MSTRG.23472:MSTRG.22528:MSTRG.19546:MSTRG.7741:MSTRG.22295:MSTRG.19765:MSTRG.3929:MSTRG.6819:MSTRG.11814:MSTRG.10087:MSTRG.20250:MSTRG.13758:MSTRG.18815:MSTRG.21195:SMESG000072873.1:MSTRG.19883:MSTRG.3843:MSTRG.5337:MSTRG.14880:MSTRG.5693:MSTRG.10837:…	znf596:Lox5a:Lox5b:egr*-2:egr4-1:egr4-2:ets-3:ets-5:fli-2:fli-3:ets-1:etv4:elf1:fli-1:foxD1:foxD2:foxD3:foxF1 :foxF2:foxG:foxL1:foxO:pou-p1:foxP:foxN(P):foxQ/D:foxJ1-1:foxJ1-2:foxJ1-3:foxJ1-4:foxJ1-5:foxN2/3-1:foxN2/3-2:foxN2/3-3:foxK1:foxK2:foxK3:fezf2:gfi1:zfp541:zfhx3:prdm14:hesl-3:nkx6-2:hesl-2:Hox1:Hox4a:Hox3a:cbt:lhx1-3:Mef2-1:gtf2a1:Mef2-2:sall4:fir1:zfp-8:zfp236-1:zfp354:znf101:znf425:znf…	54
190	dd_Smes_g4_101	631325	631703	379	*	k27ac_pooled_april21_peak_1655	2.54223	Intron (MSTRG.1079.1/MSTRG.1079, intron 1 of 8)	4	592386	633456	41071	2	MSTRG.1079	MSTRG.1079.1	1753	6.36733	0.223207	-0.0721486	-0.0742038	0	0	0	0.202652	-0.313844	MLXIP	MLX interacting protein [Source:HGNC Symbol;Acc:HGNC:17055]	MSTRG.4288:MSTRG.4289:MSTRG.22163:MSTRG.16827:MSTRG.9571:MSTRG.624:MSTRG.11386:MSTRG.22087:MSTRG.10044:MSTRG.5025:MSTRG.2484:MSTRG.1218:MSTRG.9193:MSTRG.20466:MSTRG.17923:MSTRG.22990:MSTRG.3741:MSTRG.4403:MSTRG.19305:MSTRG.12851:MSTRG.17155:SMESG000049967.1:MSTRG.10215:MSTRG.10177:MSTRG.15979:MSTRG.2271:MSTRG.4208:MSTRG.16892:MSTRG.11214:MSTRG.19581:MSTRG.18805:MSTRG.6003:MSTRG.17044:MSTRG.18823:…	hinfp-1:hinfp-2:rest-1:zfp674:znf-1:znf91:znf333-1:znf652:zscan2-2:zscan2-6:egr*-2:egr4-1:egr4-2:gli-1:gli-2:gli-3:hesl-3:hnf4:hesl-2:nerfin2-1:atmin:zscan2-4:cbt:klf-3:klf-1:egr-2:smad1:smad9:myoD:neuroD-1:fer3l-3:nkx2l-1:nr2f1:nr4a-1:nr4a-2:Xfin:zfp-4:zbed-1:zf-5:a:zfp-7:gtf2b-4:kdm5b:scratch-like:sp5:klf-2:sp6-9:sp8:six3:six6-2:six6-3:mitfl-2:znf333-2:znf207:znf143:zic-1:zic-2:egr-1:ovo-1:prdm…	39	MSTRG.7998:MSTRG.23420:MSTRG.5414:MSTRG.12684:MSTRG.20458:MSTRG.19091:MSTRG.11405:MSTRG.7287:MSTRG.23578:MSTRG.20904:MSTRG.1469:MSTRG.12466:MSTRG.7427:MSTRG.20979:MSTRG.6445:MSTRG.6954:MSTRG.8925:MSTRG.4330:MSTRG.14931:MSTRG.12358:MSTRG.19417:MSTRG.432:MSTRG.21315:MSTRG.6529:MSTRG.3802:MSTRG.261:MSTRG.764:MSTRG.23136:MSTRG.2111:MSTRG.18649:MSTRG.4755:MSTRG.5349:MSTRG.6378:MSTRG.19902:MSTRG.5260:M…	Lox5a:Lox5b:tlx-1:nkx5-3:rest-2:coe:gcm-2:nkx6-2:Hox1:Hox4a:lhx2-3:lmx1-1:lhx1-3:lhx3:musculin:msx:sall4:fir1:zfp-8:zfp236-1:zfp354:znf101:znf425:znf660:lmpt-3:nkx3-2:nkx6-1:hr51:pax2/5/8-1:Pbx-4:Prep:znf181:zbtb24:ski-1:ctcf:zfp-10:zfp677:shox:smad4-1:tal:ptf-4:Tbx-20:da:ap4-1:ptf-5:uncx:yy2:zbed8:rreb1:zfp-6:zf-2:zf-8:Lox4:alx4:prdm1-1:zfp-3:zfp878:zbed1:zscan2-7:irx-1:irx6-1:irx6-2:irx6-3:ikzf…	43
191	dd_Smes_g4_101	1523824	1524045	222	*	k27ac_pooled_april21_peak_1662	4.33223	Intron (SMEST000377005.1/MSTRG.1107, intron 1 of 12)	4	1515160	1561178	46019	1	MSTRG.1107	MSTRG.1107.4	8664	0.239873	0.0263979	-0.253878	-0.350954	0	0	0	0.70165	-0.426856	KCNH7	potassium voltage-gated channel subfamily H member 7 [Source:HGNC Symbol;Acc:HGNC:18863]	MSTRG.20458:MSTRG.23304:MSTRG.8862:MSTRG.5535:MSTRG.17691:MSTRG.10215:MSTRG.10177:MSTRG.15979:a:MSTRG.7606:MSTRG.3785:MSTRG.6271:MSTRG.7110:MSTRG.20330	rest-2:fezf2:gfi1:zfp541:zfhx3:cbt:klf-3:klf-1:a:sp5:six3:six6-2:six6-3:znf333-2	9	MSTRG.7896:MSTRG.7998:MSTRG.23420:MSTRG.12684:MSTRG.19544:MSTRG.4288:MSTRG.4289:MSTRG.22163:MSTRG.16827:MSTRG.9571:MSTRG.624:MSTRG.11386:MSTRG.22087:MSTRG.10044:MSTRG.5025:MSTRG.2221:MSTRG.2484:MSTRG.1218:MSTRG.9193:MSTRG.13758:MSTRG.18815:MSTRG.21195:SMESG000072873.1:MSTRG.19883:MSTRG.3843:MSTRG.5337:MSTRG.14880:MSTRG.5693:MSTRG.10837:MSTRG.11405:MSTRG.20466:MSTRG.17923:MSTRG.22990:MSTRG.16138:M…	znf596:Lox5a:Lox5b:nkx5-3:creb3l-1:hinfp-1:hinfp-2:rest-1:zfp674:znf-1:znf91:znf333-1:znf652:zscan2-2:zscan2-6:dbx:egr*-2:egr4-1:egr4-2:foxN(P):foxQ/D:foxJ1-1:foxJ1-2:foxJ1-3:foxJ1-4:foxJ1-5:foxN2/3-1:foxN2/3-2:foxN2/3-3:gcm-2:gli-1:gli-2:gli-3:prdm14:hesl-3:nkx6-2:hnf4:hesl-2:nkx3-1:nkx5-2:nkx5-1:Hox3a:nerfin2-1:isl-1:isl-2:atmin:zscan2-4:egr-2:lmx1-1:lhx1-3:mlx:musculin:sall4:fir1:zfp-8:zfp236-…	71
192	dd_Smes_g4_101	1590574	1590728	155	*	k27ac_pooled_april21_peak_1667	9.34763	Promoter	4	1589940	1601538	11599	1	MSTRG.1108	MSTRG.1108.3	634	0.525435	0.112216	0.00647572	0.0314169	1	0	0	0.0358479	0.975945	ISLR	immunoglobulin superfamily containing leucine rich repeat [Source:HGNC Symbol;Acc:HGNC:6133]	-	-	0	MSTRG.7896:MSTRG.7998:MSTRG.23420:MSTRG.5414:MSTRG.12684:MSTRG.2221:MSTRG.14008:MSTRG.5081:MSTRG.11379:MSTRG.22994:MSTRG.4327:MSTRG.19528:MSTRG.2656:MSTRG.2731:MSTRG.23472:MSTRG.9479:MSTRG.5625:MSTRG.2171:MSTRG.22528:MSTRG.19546:MSTRG.7741:MSTRG.3929:MSTRG.6819:MSTRG.11814:MSTRG.10087:MSTRG.20250:MSTRG.13758:MSTRG.18451:MSTRG.12975:MSTRG.17474:MSTRG.20466:MSTRG.17923:MSTRG.12700:MSTRG.8018:MSTRG.…	znf596:Lox5a:Lox5b:tlx-1:nkx5-3:dbx:dll-1:emx1:ets-5:fli-2:fli-3:ets-1:etv4:elf1:fli-1:foxA(P):foxC1:foxC2:foxD1:foxD2:foxD3:foxG:foxL1:foxO:pou-p1:foxP:foxN(P):foxK1:foxK2:foxK3:gli-1:gli-2:gata456-1:gata456-2:gata456-4:fezf2:gfi1:zfp541:zfhx3:nkx6-2:hnf4:Hox1:Hox4a:atmin:zscan2-4:cbt:klf-1:lhx2-1:lhx2-4:lhx1-3:lhx3:meis-1:meox:nf-ya1:nf-ya2:nkx2l-1:a:nr2f1:nr4a-1:nr4a-2:onecut-1:onecut-2:onecut…	75
193	dd_Smes_g4_102	359593	360186	594	*	k27ac_pooled_april21_peak_1682	4.57788	Distal Intergenic	5	360753	362648	1896	2	MSTRG.1140	SMEST000703001.1	2462	2.54923	0.048791	-0.654277	-0.802328	0	0	0	0.62092	-0.173245	SLC37A3	solute carrier family 37 member 3 [Source:HGNC Symbol;Acc:HGNC:20651]	-	-	0	MSTRG.10887:MSTRG.7896:MSTRG.9597:MSTRG.6974:MSTRG.7998:MSTRG.23420:MSTRG.21923:MSTRG.9638:MSTRG.19544:MSTRG.4288:MSTRG.4289:MSTRG.22163:MSTRG.16827:MSTRG.9571:MSTRG.624:MSTRG.11386:MSTRG.22087:MSTRG.10044:MSTRG.5025:MSTRG.20458:MSTRG.2221:MSTRG.19091:MSTRG.2484:MSTRG.1218:MSTRG.9193:MSTRG.11379:MSTRG.22994:MSTRG.4327:MSTRG.19528:MSTRG.2656:MSTRG.10087:MSTRG.20250:MSTRG.3741:MSTRG.7287:MSTRG.1930…	arnt-1:znf596:pax3/7-1:alx3-2:Lox5a:Lox5b:barhl2-1:barhl2-2:creb3l-1:hinfp-1:hinfp-2:rest-1:zfp674:znf-1:znf91:znf333-1:znf652:zscan2-2:zscan2-6:rest-2:dbx:coe:egr*-2:egr4-1:egr4-2:ets-5:fli-2:fli-3:ets-1:etv4:pou-p1:foxP:hesl-3:nkx6-2:hesl-2:nkx5-1:Hox3a:nerfin2-1:atmin:zscan2-4:cbt:klf-3:klf-1:lhx1-3:Mef2-1:gtf2a1:Mef2-2:sall4:fir1:zfp-8:zfp236-1:zfp354:znf101:znf425:znf660:lmpt-3:smad1:smad9:m…	66
194	dd_Smes_g4_102	360729	361729	1001	*	k27ac_pooled_april21_peak_1683	5.7322	Promoter	5	360753	362648	1896	2	MSTRG.1140	SMEST000703001.1	919	2.54923	0.048791	-0.506027	-0.466313	0	0	0	0.62092	-0.173245	SLC37A3	solute carrier family 37 member 3 [Source:HGNC Symbol;Acc:HGNC:20651]	MSTRG.2484:MSTRG.1218:MSTRG.9193:MSTRG.11214:MSTRG.3565:MSTRG.7049:MSTRG.19418:MSTRG.20936:MSTRG.11197:MSTRG.22732:MSTRG.308:MSTRG.1201:MSTRG.8933	egr*-2:egr4-1:egr4-2:myoD:Xfin:zfp-4:zbed-1:zf-5:egr-1:ovo-1:prdm13:gl:znf341	4	MSTRG.7896:MSTRG.9597:MSTRG.7998:MSTRG.23420:MSTRG.23513:MSTRG.5414:MSTRG.19544:MSTRG.4288:MSTRG.4289:MSTRG.22163:MSTRG.16827:MSTRG.9571:MSTRG.624:MSTRG.11386:MSTRG.22087:MSTRG.10044:MSTRG.5025:MSTRG.20458:MSTRG.2221:MSTRG.19091:MSTRG.10604:MSTRG.11379:MSTRG.22994:MSTRG.4327:MSTRG.19528:MSTRG.2656:MSTRG.23472:MSTRG.10087:MSTRG.20250:MSTRG.20466:MSTRG.17923:MSTRG.22990:MSTRG.23304:MSTRG.8862:MSTRG…	znf596:pax3/7-1:Lox5a:Lox5b:e22/23:tlx-1:creb3l-1:hinfp-1:hinfp-2:rest-1:zfp674:znf-1:znf91:znf333-1:znf652:zscan2-2:zscan2-6:rest-2:dbx:coe:ets-3:ets-5:fli-2:fli-3:ets-1:etv4:fli-1:pou-p1:foxP:gli-1:gli-2:gli-3:fezf2:gfi1:zfp541:zfhx3:nkx6-2:hnf4:nerfin2-1:atmin:zscan2-4:cbt:klf-1:lhx1-3:Mef2-1:gtf2a1:Mef2-2:meis-1:mlx:sall4:fir1:zfp-8:zfp236-1:zfp354:znf101:znf425:znf660:lmpt-3:smad1:smad9:mitf…	73
195	dd_Smes_g4_102	361363	362049	687	*	k27ac_pooled_april21_peak_1684	3.70272	Promoter	5	360753	362648	1896	2	MSTRG.1140	SMEST000703001.1	599	2.54923	0.048791	-0.274181	-0.299302	0	0	0	0.62092	-0.173245	SLC37A3	solute carrier family 37 member 3 [Source:HGNC Symbol;Acc:HGNC:20651]	MSTRG.2484:MSTRG.1218:MSTRG.9193:MSTRG.11214:MSTRG.3565:MSTRG.7049:MSTRG.19418:MSTRG.20936:MSTRG.11197:MSTRG.22732:MSTRG.308:MSTRG.1201:MSTRG.8933:MSTRG.22352:MSTRG.2646	egr*-2:egr4-1:egr4-2:myoD:Xfin:zfp-4:zbed-1:zf-5:egr-1:ovo-1:prdm13:gl:znf341:pou2/3-1:pou2/3-2	5	MSTRG.7896:MSTRG.9597:MSTRG.6974:MSTRG.7998:MSTRG.23420:MSTRG.23513:MSTRG.10410:MSTRG.5414:MSTRG.19544:MSTRG.4288:MSTRG.4289:MSTRG.22163:MSTRG.16827:MSTRG.9571:MSTRG.624:MSTRG.11386:MSTRG.22087:MSTRG.10044:MSTRG.5025:MSTRG.2221:MSTRG.10604:MSTRG.11379:MSTRG.22994:MSTRG.4327:MSTRG.19528:MSTRG.2656:MSTRG.23472:MSTRG.20466:MSTRG.17923:MSTRG.22990:MSTRG.23304:MSTRG.8862:MSTRG.5535:MSTRG.17691:MSTRG.7…	znf596:pax3/7-1:alx3-2:Lox5a:Lox5b:e22/23:bsx:tlx-1:creb3l-1:hinfp-1:hinfp-2:rest-1:zfp674:znf-1:znf91:znf333-1:znf652:zscan2-2:zscan2-6:dbx:ets-3:ets-5:fli-2:fli-3:ets-1:etv4:fli-1:gli-1:gli-2:gli-3:fezf2:gfi1:zfp541:zfhx3:nkx6-2:hnf4:hesl-2:nkx5-1:nerfin2-1:isl-1:isl-2:atmin:zscan2-4:klf-1:lhx2-3:lhx1-1:lhx1-4:lhx1-3:Mef2-1:gtf2a1:Mef2-2:meis-1:mlx:msx:smad1:smad9:mitfl-3:neuroD-1:fer3l-3:nf-ya…	74
196	dd_Smes_g4_102	410798	411088	291	*	k27ac_pooled_april21_peak_1685	3.57831	Promoter	5	410231	411600	1370	1	MSTRG.1145	MSTRG.1145.8	567	15.1122	0.353099	-0.216513	-0.0285106	0	0	0	0.960851	-0.0186524	PIGG	phosphatidylinositol glycan anchor biosynthesis class G [Source:HGNC Symbol;Acc:HGNC:25985]	-	-	0	MSTRG.7998:MSTRG.23420:MSTRG.21923:MSTRG.9638:MSTRG.12684:MSTRG.4288:MSTRG.4289:MSTRG.22163:MSTRG.16827:MSTRG.9571:MSTRG.624:MSTRG.11386:MSTRG.22087:MSTRG.10044:MSTRG.5025:MSTRG.20458:MSTRG.14008:MSTRG.10604:MSTRG.19528:MSTRG.23309:MSTRG.9120:MSTRG.12700:MSTRG.8018:MSTRG.11935:MSTRG.3741:MSTRG.7287:MSTRG.4403:MSTRG.13843:MSTRG.7792:MSTRG.6856:MSTRG.10592:MSTRG.12851:MSTRG.17155:SMESG000049967.1:M…	Lox5a:Lox5b:barhl2-1:barhl2-2:nkx5-3:hinfp-1:hinfp-2:rest-1:zfp674:znf-1:znf91:znf333-1:znf652:zscan2-2:zscan2-6:rest-2:dll-1:ets-3:ets-1:gata123:gata456-3:gata456-1:gata456-2:gata456-4:hesl-3:nkx6-2:hnf4:Hox4b:nkx3-1:nkx5-2:nkx5-1:nerfin2-1:atmin:zscan2-4:egr-2:lbx:lmx1-1:lhx1-3:lhx3:meis-1:a:nr4a-1:nr4a-2:onecut-1:onecut-2:onecut-3:onecut-5:hnf6:cux-2:Prep:Xfin:zfp-4:zbed-1:zf-5:pou4-1:pou4-2:z…	58
197	dd_Smes_g4_102	431673	431889	217	*	k27ac_pooled_april21_peak_1686	6.55343	Intron (SMEST000709001.1/MSTRG.1146, intron 1 of 2)	5	429206	439457	10252	1	MSTRG.1146	MSTRG.1146.3	2467	0.071671	0.0205488	-0.515559	-0.105474	0	0	0			PANX2	pannexin 2 [Source:HGNC Symbol;Acc:HGNC:8600]	-	-	0	MSTRG.10887:MSTRG.7896:MSTRG.7998:MSTRG.23420:MSTRG.1217:MSTRG.4483:MSTRG.17936:MSTRG.5414:MSTRG.22126:SMESG000049970.1:SMESG000031904.1:MSTRG.221:MSTRG.2221:MSTRG.5625:MSTRG.2171:MSTRG.22528:MSTRG.19546:MSTRG.7741:MSTRG.22295:MSTRG.19765:MSTRG.3929:MSTRG.6819:MSTRG.11814:MSTRG.13758:MSTRG.18815:MSTRG.21195:SMESG000072873.1:MSTRG.19883:MSTRG.3843:MSTRG.5337:MSTRG.14880:MSTRG.5693:MSTRG.10837:MSTR…	arnt-1:znf596:Lox5a:Lox5b:egr-5:znf362:zf-4:tlx-1:zfp560-1:zscan2-5:zscan2-8:zf-6:dbx:foxC1:foxC2:foxD1:foxD2:foxD3:foxF1 :foxF2:foxG:foxL1:foxO:foxN(P):foxQ/D:foxJ1-1:foxJ1-2:foxJ1-3:foxJ1-4:foxJ1-5:foxN2/3-1:foxN2/3-2:foxN2/3-3:foxK1:foxK2:foxK3:gata123:gata456-3:gli-1:gli-2:gli-3:prdm14:nkx6-2:hesl-2:Hox1:Hox4a:Hox3a:egr-2:lhx1-3:meis-1:meox:mlx:musculin:mitfl-3:a:nkx6-1:hr51:pax2/5/8-1:pitx:P…	60
198	dd_Smes_g4_102	742841	743294	454	*	k27ac_pooled_april21_peak_1717	6.19022	Promoter	5	744011	744668	658	1	MSTRG.1157	MSTRG.1157.1	-717	0.95902	0.322668	-0.267809	-0.224932	0	0	0			-	-	-	-	0	MSTRG.7896:MSTRG.7998:MSTRG.23420:MSTRG.23513:MSTRG.10410:SMESG000022963.1:MSTRG.1217:MSTRG.4483:MSTRG.17936:MSTRG.4288:MSTRG.4289:MSTRG.22163:MSTRG.16827:MSTRG.9571:MSTRG.624:MSTRG.11386:MSTRG.22087:MSTRG.10044:MSTRG.5025:MSTRG.20458:MSTRG.2221:MSTRG.19091:MSTRG.2484:MSTRG.1218:MSTRG.9193:MSTRG.5081:MSTRG.2656:MSTRG.23472:MSTRG.9479:MSTRG.5625:MSTRG.2171:MSTRG.22528:MSTRG.19546:MSTRG.7741:MSTRG.…	znf596:Lox5a:Lox5b:e22/23:bsx:barhl1:egr-5:znf362:zf-4:hinfp-1:hinfp-2:rest-1:zfp674:znf-1:znf91:znf333-1:znf652:zscan2-2:zscan2-6:rest-2:dbx:coe:egr*-2:egr4-1:egr4-2:emx1:etv4:fli-1:foxA(P):foxC1:foxC2:foxD1:foxD2:foxD3:foxF1 :foxF2:foxG:foxL1:foxO:pou-p1:foxP:foxN(P):foxQ/D:foxJ1-1:foxJ1-2:foxJ1-3:foxJ1-4:foxJ1-5:foxN2/3-1:foxN2/3-2:foxN2/3-3:foxK1:foxK2:foxK3:gcm-2:fezf2:gfi1:zfp541:zfhx3:prdm…	85
199	dd_Smes_g4_102	1599801	1600014	214	*	k27ac_pooled_april21_peak_1758	5.29339	Intron (SMEST000615007.1/MSTRG.1185, intron 6 of 15)	5	1573779	1592774	18996	2	MSTRG.1185	SMEST000615003.1	-7027	1.12516	0.206439	-0.98796	-0.774035	0	0	0	0.563971	-0.438798	UNC5A	unc-5 netrin receptor A [Source:HGNC Symbol;Acc:HGNC:12567]	-	-	0	MSTRG.7896:MSTRG.7998:MSTRG.23420:MSTRG.21923:MSTRG.9638:MSTRG.5414:MSTRG.12684:MSTRG.19544:MSTRG.20458:MSTRG.2221:MSTRG.14008:MSTRG.9479:MSTRG.5625:MSTRG.2171:MSTRG.22528:MSTRG.19546:MSTRG.7741:MSTRG.22295:MSTRG.19765:MSTRG.3929:MSTRG.6819:MSTRG.11814:MSTRG.10087:MSTRG.20250:MSTRG.13758:MSTRG.18815:MSTRG.21195:SMESG000072873.1:MSTRG.19883:MSTRG.3843:MSTRG.5337:MSTRG.14880:MSTRG.5693:MSTRG.10837:…	znf596:Lox5a:Lox5b:barhl2-1:barhl2-2:tlx-1:nkx5-3:creb3l-1:rest-2:dbx:dll-1:foxA(P):foxC1:foxC2:foxD1:foxD2:foxD3:foxF1 :foxF2:foxG:foxL1:foxO:pou-p1:foxP:foxN(P):foxQ/D:foxJ1-1:foxJ1-2:foxJ1-3:foxJ1-4:foxJ1-5:foxN2/3-1:foxN2/3-2:foxN2/3-3:foxK1:foxK2:foxK3:gli-1:gli-2:gata456-1:gata456-2:gata456-4:nkx6-2:klf-3:lbx:lhx2-3:lmx1-1:lhx1-3:lhx3:meis-1:mlx:msx:smad1:smad9:pdp1:nf-ya1:nf-ya2:nr4a-1:nr4…	63
200	dd_Smes_g4_102	1606575	1606843	269	*	k27ac_pooled_april21_peak_1760	5.85043	Intron (SMEST000615007.1/MSTRG.1185, intron 4 of 15)	5	1573779	1592774	18996	2	MSTRG.1185	SMEST000615003.1	-13801	1.12516	0.206439	-0.204793	-0.328637	0	0	0	0.563971	-0.438798	UNC5A	unc-5 netrin receptor A [Source:HGNC Symbol;Acc:HGNC:12567]	MSTRG.12684:MSTRG.10592:MSTRG.5091:MSTRG.8974:MSTRG.13371:SMESG000077917.1:MSTRG.22352:MSTRG.2646	nkx5-3:nkx5-1:arx:nkx1:nkx1-1:nkx1-2:pou2/3-1:pou2/3-2	5	MSTRG.7896:MSTRG.9597:MSTRG.1217:MSTRG.4483:MSTRG.17936:MSTRG.5414:MSTRG.20458:MSTRG.2221:MSTRG.2484:MSTRG.1218:MSTRG.9193:MSTRG.22528:MSTRG.19546:MSTRG.7741:MSTRG.3929:MSTRG.6819:MSTRG.11814:MSTRG.10087:MSTRG.20250:MSTRG.22990:MSTRG.23304:MSTRG.8862:MSTRG.5535:MSTRG.17691:MSTRG.16138:MSTRG.7792:MSTRG.6856:MSTRG.12851:MSTRG.17848:MSTRG.9911:MSTRG.10177:MSTRG.7427:MSTRG.1897:MSTRG.6445:MSTRG.11214…	znf596:pax3/7-1:egr-5:znf362:zf-4:tlx-1:rest-2:dbx:egr*-2:egr4-1:egr4-2:foxD1:foxD2:foxD3:foxG:foxL1:foxO:pou-p1:foxP:gli-3:fezf2:gfi1:zfp541:zfhx3:prdm14:nkx3-1:nkx5-2:nerfin2-1:isl-1:isl-2:klf-3:lhx1-3:meis-1:musculin:myoD:nf-ya1:nf-ya2:nkx3-2:hr51:pitx:Pbx-4:Prep:pou1:a:gtf2b-4:kdm5b:ctcf:zfp-10:zfp677:rx:klf-2:six4:Tbx-1/10:Tbx-20:Tbx-2/3a:Tbx-2/3c:da:ap4-1:ptf-5:rreb1:zfp-6:zf-2:zf-8:znf333-…	60
201	dd_Smes_g4_102	1606575	1606843	269	*	k27ac_pooled_april21_peak_1761	5.49755	Intron (SMEST000615007.1/MSTRG.1185, intron 4 of 15)	5	1573779	1592774	18996	2	MSTRG.1185	SMEST000615003.1	-13801	1.12516	0.206439	-0.204793	-0.328637	0	0	0	0.563971	-0.438798	UNC5A	unc-5 netrin receptor A [Source:HGNC Symbol;Acc:HGNC:12567]	MSTRG.12684:MSTRG.10592:MSTRG.5091:MSTRG.8974:MSTRG.13371:SMESG000077917.1:MSTRG.22352:MSTRG.2646	nkx5-3:nkx5-1:arx:nkx1:nkx1-1:nkx1-2:pou2/3-1:pou2/3-2	5	MSTRG.7896:MSTRG.9597:MSTRG.1217:MSTRG.4483:MSTRG.17936:MSTRG.5414:MSTRG.20458:MSTRG.2221:MSTRG.2484:MSTRG.1218:MSTRG.9193:MSTRG.22528:MSTRG.19546:MSTRG.7741:MSTRG.3929:MSTRG.6819:MSTRG.11814:MSTRG.10087:MSTRG.20250:MSTRG.22990:MSTRG.23304:MSTRG.8862:MSTRG.5535:MSTRG.17691:MSTRG.16138:MSTRG.7792:MSTRG.6856:MSTRG.12851:MSTRG.17848:MSTRG.9911:MSTRG.10177:MSTRG.7427:MSTRG.1897:MSTRG.6445:MSTRG.11214…	znf596:pax3/7-1:egr-5:znf362:zf-4:tlx-1:rest-2:dbx:egr*-2:egr4-1:egr4-2:foxD1:foxD2:foxD3:foxG:foxL1:foxO:pou-p1:foxP:gli-3:fezf2:gfi1:zfp541:zfhx3:prdm14:nkx3-1:nkx5-2:nerfin2-1:isl-1:isl-2:klf-3:lhx1-3:meis-1:musculin:myoD:nf-ya1:nf-ya2:nkx3-2:hr51:pitx:Pbx-4:Prep:pou1:a:gtf2b-4:kdm5b:ctcf:zfp-10:zfp677:rx:klf-2:six4:Tbx-1/10:Tbx-20:Tbx-2/3a:Tbx-2/3c:da:ap4-1:ptf-5:rreb1:zfp-6:zf-2:zf-8:znf333-…	60
202	dd_Smes_g4_103	413619	413882	264	*	k27ac_pooled_april21_peak_1821	3.21588	Promoter	6	413658	414138	481	2	MSTRG.1216	MSTRG.1216.3	256	0.133881	0.0342375	-0.756596	-0.661357	0	0	0	0.850739	-0.208331	PTF1A	pancreas associated transcription factor 1a [Source:HGNC Symbol;Acc:HGNC:23734]	-	-	0	MSTRG.10887:MSTRG.7998:MSTRG.23420:MSTRG.10410:SMESG000022963.1:MSTRG.1217:MSTRG.4483:MSTRG.17936:MSTRG.12684:MSTRG.19544:MSTRG.4288:MSTRG.4289:MSTRG.22163:MSTRG.16827:MSTRG.9571:MSTRG.624:MSTRG.11386:MSTRG.22087:MSTRG.10044:MSTRG.5025:MSTRG.20458:MSTRG.5081:MSTRG.2656:MSTRG.23304:MSTRG.8862:MSTRG.5535:MSTRG.17691:MSTRG.3741:MSTRG.7287:MSTRG.17848:MSTRG.9911:MSTRG.2271:MSTRG.18888:MSTRG.4069:MSTR…	arnt-1:Lox5a:Lox5b:bsx:barhl1:egr-5:znf362:zf-4:nkx5-3:creb3l-1:hinfp-1:hinfp-2:rest-1:zfp674:znf-1:znf91:znf333-1:znf652:zscan2-2:zscan2-6:rest-2:emx1:etv4:fezf2:gfi1:zfp541:zfhx3:hesl-3:nkx6-2:isl-1:isl-2:egr-2:lbx:lhx2-1:lhx2-4:lhx2-3:lhx1-1:lhx1-4:lhx1-3:lhx3:meox:msx:sall4:fir1:zfp-8:zfp236-1:zfp354:znf101:znf425:znf660:lmpt-3:mitfl-3:neuroD-1:fer3l-3:nf-ya1:nf-ya2:nkx6-1:hr51:onecut-1:onecu…	56
203	dd_Smes_g4_103	414089	414398	310	*	k27ac_pooled_april21_peak_1821	3.21588	Promoter	6	405323	414393	9071	2	MSTRG.1216	MSTRG.1216.1	0	0.133881	0.0342375	-0.756596	-0.661357	0	0	0	0.850739	-0.208331	PTF1A	pancreas associated transcription factor 1a [Source:HGNC Symbol;Acc:HGNC:23734]	-	-	0	MSTRG.10887:MSTRG.7998:MSTRG.23420:MSTRG.10410:SMESG000022963.1:MSTRG.1217:MSTRG.4483:MSTRG.17936:MSTRG.12684:MSTRG.19544:MSTRG.4288:MSTRG.4289:MSTRG.22163:MSTRG.16827:MSTRG.9571:MSTRG.624:MSTRG.11386:MSTRG.22087:MSTRG.10044:MSTRG.5025:MSTRG.20458:MSTRG.19091:MSTRG.2484:MSTRG.1218:MSTRG.9193:MSTRG.5081:MSTRG.2656:MSTRG.20466:MSTRG.17923:MSTRG.22990:MSTRG.23304:MSTRG.8862:MSTRG.5535:MSTRG.17691:MS…	arnt-1:Lox5a:Lox5b:bsx:barhl1:egr-5:znf362:zf-4:nkx5-3:creb3l-1:hinfp-1:hinfp-2:rest-1:zfp674:znf-1:znf91:znf333-1:znf652:zscan2-2:zscan2-6:rest-2:coe:egr*-2:egr4-1:egr4-2:emx1:etv4:gli-1:gli-2:gli-3:fezf2:gfi1:zfp541:zfhx3:hesl-3:nkx6-2:hesl-2:isl-1:isl-2:atmin:zscan2-4:klf-1:egr-2:lhx2-1:lhx2-4:lhx2-3:lhx1-1:lhx1-4:lhx1-3:meox:msx:sall4:fir1:zfp-8:zfp236-1:zfp354:znf101:znf425:znf660:lmpt-3:mit…	75
204	dd_Smes_g4_103	414577	415577	1001	*	k27ac_pooled_april21_peak_1822	7.8271	Promoter	6	405372	414393	9022	2	MSTRG.1216	SMEST000956001.1	-184	0.133881	0.0342375	-0.743334	-0.723415	0	0	0	0.850739	-0.208331	PTF1A	pancreas associated transcription factor 1a [Source:HGNC Symbol;Acc:HGNC:23734]	-	-	0	MSTRG.7896:MSTRG.7998:MSTRG.23420:MSTRG.10410:SMESG000022963.1:MSTRG.1217:MSTRG.4483:MSTRG.17936:MSTRG.12684:MSTRG.4288:MSTRG.4289:MSTRG.22163:MSTRG.16827:MSTRG.9571:MSTRG.624:MSTRG.11386:MSTRG.22087:MSTRG.10044:MSTRG.5025:MSTRG.20458:MSTRG.19091:MSTRG.2484:MSTRG.1218:MSTRG.9193:MSTRG.10604:MSTRG.5081:MSTRG.11379:MSTRG.22994:MSTRG.4327:MSTRG.19528:MSTRG.2656:MSTRG.2731:MSTRG.23472:MSTRG.22528:MST…	znf596:Lox5a:Lox5b:bsx:barhl1:egr-5:znf362:zf-4:nkx5-3:hinfp-1:hinfp-2:rest-1:zfp674:znf-1:znf91:znf333-1:znf652:zscan2-2:zscan2-6:rest-2:coe:egr*-2:egr4-1:egr4-2:ets-3:emx1:ets-5:fli-2:fli-3:ets-1:etv4:elf1:fli-1:foxD1:foxD2:foxD3:foxF1 :foxF2:foxG:foxL1:foxO:pou-p1:foxP:foxN(P):foxQ/D:foxJ1-1:foxJ1-2:foxJ1-3:foxJ1-4:foxJ1-5:foxN2/3-1:foxN2/3-2:foxN2/3-3:foxK1:foxK2:foxK3:gli-1:gli-2:gli-3:fezf2…	92
205	dd_Smes_g4_103	415154	416154	1001	*	k27ac_pooled_april21_peak_1823	8.17456	Promoter	6	405372	414393	9022	2	MSTRG.1216	SMEST000956001.1	-761	0.133881	0.0342375	-0.675964	-0.523258	0	0	0	0.850739	-0.208331	PTF1A	pancreas associated transcription factor 1a [Source:HGNC Symbol;Acc:HGNC:23734]	-	-	0	MSTRG.7896:MSTRG.7998:MSTRG.23420:MSTRG.23513:MSTRG.10410:SMESG000022963.1:MSTRG.1217:MSTRG.4483:MSTRG.17936:MSTRG.12684:MSTRG.19544:MSTRG.4288:MSTRG.4289:MSTRG.22163:MSTRG.16827:MSTRG.9571:MSTRG.624:MSTRG.11386:MSTRG.22087:MSTRG.10044:MSTRG.5025:MSTRG.14008:MSTRG.19091:MSTRG.2484:MSTRG.1218:MSTRG.9193:MSTRG.10604:MSTRG.5081:MSTRG.11379:MSTRG.22994:MSTRG.4327:MSTRG.19528:MSTRG.2656:MSTRG.2731:MST…	znf596:Lox5a:Lox5b:e22/23:bsx:barhl1:egr-5:znf362:zf-4:nkx5-3:creb3l-1:hinfp-1:hinfp-2:rest-1:zfp674:znf-1:znf91:znf333-1:znf652:zscan2-2:zscan2-6:dll-1:coe:egr*-2:egr4-1:egr4-2:ets-3:emx1:ets-5:fli-2:fli-3:ets-1:etv4:elf1:fli-1:foxD1:foxD2:foxD3:foxF1 :foxF2:foxG:foxL1:foxO:pou-p1:foxP:foxN(P):foxQ/D:foxJ1-1:foxJ1-2:foxJ1-3:foxJ1-4:foxJ1-5:foxN2/3-1:foxN2/3-2:foxN2/3-3:foxK1:foxK2:foxK3:gli-1:gl…	112
206	dd_Smes_g4_103	422817	423126	310	*	k27ac_pooled_april21_peak_1824	4.40562	Distal Intergenic	6	424876	427260	2385	1	MSTRG.1217	SMEST000959001.1	-1750	39.936	0.247626	-0.900115	-0.768549	0	0	0	0.232054	-0.457802	EGR1	early growth response 1 [Source:HGNC Symbol;Acc:HGNC:3238]	-	-	0	MSTRG.10887:MSTRG.7998:MSTRG.23420:SMESG000022963.1:MSTRG.5414:MSTRG.12684:MSTRG.19544:MSTRG.2221:MSTRG.5081:MSTRG.11379:MSTRG.22994:MSTRG.4327:MSTRG.19528:MSTRG.2656:MSTRG.23472:MSTRG.23309:MSTRG.9120:MSTRG.16138:MSTRG.7287:MSTRG.4403:MSTRG.17848:MSTRG.9911:MSTRG.10177:MSTRG.4069:MSTRG.17209:MSTRG.7427:MSTRG.12930:MSTRG.12309:MSTRG.2947:MSTRG.372:MSTRG.4208:MSTRG.16892:MSTRG.261:MSTRG.8071:MSTRG…	arnt-1:Lox5a:Lox5b:barhl1:tlx-1:nkx5-3:creb3l-1:dbx:emx1:ets-5:fli-2:fli-3:ets-1:etv4:fli-1:gata123:gata456-3:prdm14:nkx6-2:hnf4:isl-1:isl-2:klf-3:lhx2-1:lhx2-4:lhx1-3:Mef2-1:gtf2a1:Mef2-2:mlx:smad1:smad9:nkx3-2:nr-1:nr2e1:tlx-2:onecut-1:onecut-2:onecut-3:onecut-5:hnf6:cux-2:pax2/5/8-1:pax6-1:pax6-2:Pbx-4:Prep:pou1:rx:mitfl-2:yy2:zbed8:rreb1:zfp-6:zf-2:zf-8:zfp-2:zfp236-2:zfp560-2:znf799:zscan2-1…	46
207	dd_Smes_g4_103	423439	423472	34	*	k27ac_pooled_april21_peak_1824	4.40562	Distal Intergenic	6	424876	427260	2385	1	MSTRG.1217	SMEST000959001.1	-1404	39.936	0.247626	-0.900115	-0.768549	0	0	0	0.232054	-0.457802	EGR1	early growth response 1 [Source:HGNC Symbol;Acc:HGNC:3238]	-	-	0	MSTRG.10887:MSTRG.7998:MSTRG.23420:SMESG000022963.1:MSTRG.5414:MSTRG.12684:MSTRG.19544:MSTRG.2221:MSTRG.2484:MSTRG.1218:MSTRG.9193:MSTRG.5081:MSTRG.11379:MSTRG.22994:MSTRG.4327:MSTRG.19528:MSTRG.2656:MSTRG.23472:MSTRG.10087:MSTRG.20250:MSTRG.23309:MSTRG.9120:MSTRG.23304:MSTRG.8862:MSTRG.5535:MSTRG.17691:MSTRG.16138:MSTRG.7287:MSTRG.4403:MSTRG.17848:MSTRG.9911:MSTRG.17155:SMESG000049967.1:MSTRG.10…	arnt-1:Lox5a:Lox5b:barhl1:tlx-1:nkx5-3:creb3l-1:dbx:egr*-2:egr4-1:egr4-2:emx1:ets-5:fli-2:fli-3:ets-1:etv4:fli-1:pou-p1:foxP:gata123:gata456-3:fezf2:gfi1:zfp541:zfhx3:prdm14:nkx6-2:hnf4:isl-1:isl-2:atmin:zscan2-4:klf-3:lhx2-1:lhx2-4:lhx2-3:lmx1-1:lhx1-3:mlx:msx:smad1:smad9:myoD:nr-1:nr2e1:tlx-2:onecut-1:onecut-2:onecut-3:onecut-5:hnf6:cux-2:pax2/5/8-1:pax6-1:pax6-2:Xfin:zfp-4:zbed-1:zf-5:znf181:z…	63
208	dd_Smes_g4_103	423439	423937	499	*	k27ac_pooled_april21_peak_1825	1.32612	Promoter	6	424876	427260	2385	1	MSTRG.1217	SMEST000959001.1	-939	39.936	0.247626	-0.911297	-0.681821	0	0	0	0.232054	-0.457802	EGR1	early growth response 1 [Source:HGNC Symbol;Acc:HGNC:3238]	-	-	0	MSTRG.10887:MSTRG.7998:MSTRG.23420:SMESG000022963.1:MSTRG.5414:MSTRG.12684:MSTRG.19544:MSTRG.2221:MSTRG.2484:MSTRG.1218:MSTRG.9193:MSTRG.5081:MSTRG.11379:MSTRG.22994:MSTRG.4327:MSTRG.19528:MSTRG.2656:MSTRG.23472:MSTRG.10087:MSTRG.20250:MSTRG.23309:MSTRG.9120:MSTRG.23304:MSTRG.8862:MSTRG.5535:MSTRG.17691:MSTRG.16138:MSTRG.7287:MSTRG.4403:MSTRG.17848:MSTRG.9911:MSTRG.17155:SMESG000049967.1:MSTRG.10…	arnt-1:Lox5a:Lox5b:barhl1:tlx-1:nkx5-3:creb3l-1:dbx:egr*-2:egr4-1:egr4-2:emx1:ets-5:fli-2:fli-3:ets-1:etv4:fli-1:pou-p1:foxP:gata123:gata456-3:fezf2:gfi1:zfp541:zfhx3:prdm14:nkx6-2:hnf4:isl-1:isl-2:atmin:zscan2-4:klf-3:lhx2-1:lhx2-4:lhx2-3:lmx1-1:lhx1-3:mlx:msx:smad1:smad9:myoD:nr-1:nr2e1:tlx-2:onecut-1:onecut-2:onecut-3:onecut-5:hnf6:cux-2:pax2/5/8-1:pax6-1:pax6-2:Xfin:zfp-4:zbed-1:zf-5:znf181:z…	63
209	dd_Smes_g4_103	608656	609170	515	*	k27ac_pooled_april21_peak_1830	2.93288	Intron (MSTRG.1221.1/MSTRG.1221, intron 3 of 5)	6	595997	636691	40695	2	MSTRG.1221	MSTRG.1221.2	27521	3.09121	0.0564146	-0.537685	-0.877767	0	0	0	0.360957	-0.348598	MCU	mitochondrial calcium uniporter [Source:HGNC Symbol;Acc:HGNC:23526]	-	-	0	MSTRG.7896:MSTRG.7998:MSTRG.23420:MSTRG.21923:MSTRG.9638:SMESG000022963.1:MSTRG.19544:MSTRG.14008:MSTRG.5081:MSTRG.22528:MSTRG.19546:MSTRG.7741:MSTRG.3929:MSTRG.6819:MSTRG.11814:MSTRG.10087:MSTRG.20250:MSTRG.12700:MSTRG.8018:MSTRG.11935:MSTRG.23304:MSTRG.8862:MSTRG.5535:MSTRG.17691:MSTRG.16138:MSTRG.7287:MSTRG.12851:MSTRG.17848:MSTRG.9911:MSTRG.1469:MSTRG.7427:MSTRG.12930:MSTRG.12309:MSTRG.2947:M…	znf596:Lox5a:Lox5b:barhl2-1:barhl2-2:barhl1:creb3l-1:dll-1:emx1:foxD1:foxD2:foxD3:foxG:foxL1:foxO:pou-p1:foxP:gata456-1:gata456-2:gata456-4:fezf2:gfi1:zfp541:zfhx3:prdm14:nkx6-2:nerfin2-1:isl-1:isl-2:lhx2-3:lhx1-3:Mef2-1:gtf2a1:Mef2-2:msx:Pbx-4:Prep:Xfin:zfp-4:zbed-1:zf-5:kdm5b:rx:shox:smad4-1:sp5:srebp:six4:egr-1:ovo-1:prdm13:gl:znf341:prdm15:zfp112:zfp408:znf486:Lox4:alx4:prdm1-1:zfp-3:zfp878:z…	45
210	dd_Smes_g4_103	812044	812109	66	*	k27ac_pooled_april21_peak_1850	1.32612	Intron (MSTRG.1233.2/MSTRG.1233, intron 4 of 6)	6	793097	808798	15702	2	MSTRG.1233	MSTRG.1233.1	-3246	15.7602	0.31558	-0.386534	-0.203269	0	0	0	0.809262	0.0708538	FNBP1	formin binding protein 1 [Source:HGNC Symbol;Acc:HGNC:17069]	-	-	0	MSTRG.10887:MSTRG.7896:MSTRG.7998:MSTRG.23420:MSTRG.5414:MSTRG.12684:MSTRG.19544:MSTRG.20458:MSTRG.10604:MSTRG.22528:MSTRG.19546:MSTRG.7741:MSTRG.22295:MSTRG.19765:MSTRG.3929:MSTRG.6819:MSTRG.11814:MSTRG.13758:MSTRG.18815:MSTRG.21195:SMESG000072873.1:MSTRG.19883:MSTRG.3843:MSTRG.5337:MSTRG.14880:MSTRG.5693:MSTRG.10837:MSTRG.18451:MSTRG.12975:MSTRG.17474:MSTRG.11405:MSTRG.22990:MSTRG.23304:MSTRG.8…	arnt-1:znf596:Lox5a:Lox5b:tlx-1:nkx5-3:creb3l-1:rest-2:ets-3:foxD1:foxD2:foxD3:foxF1 :foxF2:foxG:foxL1:foxO:foxN(P):foxQ/D:foxJ1-1:foxJ1-2:foxJ1-3:foxJ1-4:foxJ1-5:foxN2/3-1:foxN2/3-2:foxN2/3-3:foxK1:foxK2:foxK3:gcm-2:gli-3:fezf2:gfi1:zfp541:zfhx3:nkx6-2:hnf4:hesl-2:isl-1:isl-2:cbt:klf-3:lhx1-3:meis-1:mlx:nkx6-1:pax2/5/8-1:pax6-1:pax6-2:phox:pitx:pou4-1:pou4-2:znf181:zbtb24:ski-1:sp5:sp6-9:sp8:da:…	58
211	dd_Smes_g4_103	1918146	1918261	116	*	k27ac_pooled_april21_peak_1896	5.51464	Promoter	6	1914612	1918351	3740	2	MSTRG.1253	SMEST000883001.1	90	0.138409	0.0855738	-0.427366	-0.282604	0	0	0	0.716918	0.42124	CFAP92	cilia and flagella associated protein 92 (putative) [Source:HGNC Symbol;Acc:HGNC:29231]	-	-	0	MSTRG.10887:MSTRG.9597:MSTRG.6974:MSTRG.21923:MSTRG.9638:MSTRG.23513:MSTRG.12684:MSTRG.4288:MSTRG.4289:MSTRG.22163:MSTRG.16827:MSTRG.9571:MSTRG.624:MSTRG.11386:MSTRG.22087:MSTRG.10044:MSTRG.5025:MSTRG.20458:MSTRG.2221:MSTRG.2484:MSTRG.1218:MSTRG.9193:MSTRG.10087:MSTRG.20250:MSTRG.23309:MSTRG.9120:MSTRG.11405:MSTRG.20466:MSTRG.17923:MSTRG.23304:MSTRG.8862:MSTRG.5535:MSTRG.17691:MSTRG.16138:MSTRG.4…	arnt-1:pax3/7-1:alx3-2:barhl2-1:barhl2-2:e22/23:nkx5-3:hinfp-1:hinfp-2:rest-1:zfp674:znf-1:znf91:znf333-1:znf652:zscan2-2:zscan2-6:rest-2:dbx:egr*-2:egr4-1:egr4-2:pou-p1:foxP:gata123:gata456-3:gcm-2:gli-1:gli-2:fezf2:gfi1:zfp541:zfhx3:prdm14:hnf4:nkx3-1:nkx5-2:atmin:zscan2-4:cbt:klf-3:klf-1:egr-2:lhx2-3:lmx1-1:lhx1-3:meis-1:mlx:musculin:msx:sall4:fir1:zfp-8:zfp236-1:zfp354:znf101:znf425:znf660:lm…	72
212	dd_Smes_g4_105	665883	666511	629	*	k27ac_pooled_april21_peak_1962	1.89498	Distal Intergenic	8	630150	631956	1807	1	MSTRG.1343	SMEST001445001.1	35733	0.199706	0.0156107	-0.559248	-0.570203	0	0	0			ASB3	ankyrin repeat and SOCS box containing 3 [Source:HGNC Symbol;Acc:HGNC:16013]	-	-	0	MSTRG.7998:MSTRG.23420:MSTRG.1217:MSTRG.4483:MSTRG.17936:MSTRG.19544:MSTRG.22126:SMESG000049970.1:SMESG000031904.1:MSTRG.221:MSTRG.2221:MSTRG.10604:MSTRG.5081:MSTRG.20466:MSTRG.17923:MSTRG.22990:MSTRG.12700:MSTRG.8018:MSTRG.11935:MSTRG.7287:MSTRG.4403:MSTRG.23578:MSTRG.20904:MSTRG.12851:MSTRG.7427:MSTRG.18714:MSTRG.4208:MSTRG.16892:MSTRG.11214:MSTRG.14130:MSTRG.3824:MSTRG.18823:MSTRG.8332:MSTRG.2…	Lox5a:Lox5b:egr-5:znf362:zf-4:creb3l-1:zfp560-1:zscan2-5:zscan2-8:zf-6:dbx:ets-3:emx1:gli-1:gli-2:gli-3:gata456-1:gata456-2:gata456-4:nkx6-2:hnf4:Hox1:Hox4a:nerfin2-1:lhx1-3:meox:smad1:smad9:myoD:nf-ya1:nf-ya2:nr4a-1:nr4a-2:pax2/5/8-1:Pbx-4:Prep:pou4-1:pou4-2:zfp-7:kdm5b:smad4-1:six3:six6-2:six6-3:Tbx-20:ap4-1:yy2:zbed8:rreb1:zfp-6:zf-2:zf-8:znf143:egr-1:ovo-1:prdm13:gl:znf341:prdm15:zfp112:zfp40…	43
213	dd_Smes_g4_105	665883	666670	788	*	k27ac_pooled_april21_peak_1963	2.86165	Distal Intergenic	8	630150	631956	1807	1	MSTRG.1343	SMEST001445001.1	35733	0.199706	0.0156107	-0.559248	-0.570203	0	0	0			ASB3	ankyrin repeat and SOCS box containing 3 [Source:HGNC Symbol;Acc:HGNC:16013]	-	-	0	MSTRG.7998:MSTRG.23420:MSTRG.1217:MSTRG.4483:MSTRG.17936:MSTRG.19544:MSTRG.22126:SMESG000049970.1:SMESG000031904.1:MSTRG.221:MSTRG.2221:MSTRG.10604:MSTRG.5081:MSTRG.20466:MSTRG.17923:MSTRG.22990:MSTRG.12700:MSTRG.8018:MSTRG.11935:MSTRG.7287:MSTRG.4403:MSTRG.23578:MSTRG.20904:MSTRG.12851:MSTRG.7427:MSTRG.18714:MSTRG.4208:MSTRG.16892:MSTRG.11214:MSTRG.14130:MSTRG.3824:MSTRG.18823:MSTRG.8332:MSTRG.2…	Lox5a:Lox5b:egr-5:znf362:zf-4:creb3l-1:zfp560-1:zscan2-5:zscan2-8:zf-6:dbx:ets-3:emx1:gli-1:gli-2:gli-3:gata456-1:gata456-2:gata456-4:nkx6-2:hnf4:Hox1:Hox4a:nerfin2-1:lhx1-3:meox:smad1:smad9:myoD:nf-ya1:nf-ya2:nr4a-1:nr4a-2:pax2/5/8-1:Pbx-4:Prep:pou4-1:pou4-2:zfp-7:kdm5b:smad4-1:six3:six6-2:six6-3:Tbx-20:ap4-1:yy2:zbed8:rreb1:zfp-6:zf-2:zf-8:znf143:egr-1:ovo-1:prdm13:gl:znf341:prdm15:zfp112:zfp40…	43
214	dd_Smes_g4_105	1827323	1827644	322	*	k27ac_pooled_april21_peak_2016	2.55561	Promoter	8	1827557	1872730	45174	1	MSTRG.1373	MSTRG.1373.1	0	40.4592	0.688529	-0.349127	-0.65517	0	0	0	0.445532	-0.429948	-	-	-	-	0	MSTRG.7896:MSTRG.9597:MSTRG.6974:MSTRG.7998:MSTRG.23420:MSTRG.1217:MSTRG.4483:MSTRG.17936:MSTRG.12684:MSTRG.4288:MSTRG.4289:MSTRG.22163:MSTRG.16827:MSTRG.9571:MSTRG.624:MSTRG.11386:MSTRG.22087:MSTRG.10044:MSTRG.5025:MSTRG.20458:MSTRG.22126:SMESG000049970.1:SMESG000031904.1:MSTRG.221:MSTRG.2221:MSTRG.2731:MSTRG.12700:MSTRG.8018:MSTRG.11935:MSTRG.16138:MSTRG.3741:MSTRG.7287:MSTRG.17848:MSTRG.9911:M…	znf596:pax3/7-1:alx3-2:Lox5a:Lox5b:egr-5:znf362:zf-4:nkx5-3:hinfp-1:hinfp-2:rest-1:zfp674:znf-1:znf91:znf333-1:znf652:zscan2-2:zscan2-6:rest-2:zfp560-1:zscan2-5:zscan2-8:zf-6:dbx:elf1:gata456-1:gata456-2:gata456-4:prdm14:hesl-3:nkx6-2:isl-1:isl-2:lhx1-3:lhx3:mlx:pdp1:nf-ya1:nf-ya2:nkx2l-1:a:nkx3-2:hr51:onecut-1:onecut-2:onecut-3:onecut-5:hnf6:cux-2:pax2/5/8-1:Xfin:zfp-4:zbed-1:zf-5:pou4-1:pou4-2:…	46
215	dd_Smes_g4_106	330672	330877	206	*	k27ac_pooled_april21_peak_2026	4.75294	Intron (MSTRG.1399.1/MSTRG.1399, intron 6 of 6)	9	284593	349987	65395	2	MSTRG.1399	MSTRG.1399.1	19110	0.292216	0.13241	-0.101149	-0.496366	0	0	0			HHAT	hedgehog acyltransferase [Source:HGNC Symbol;Acc:HGNC:18270]	MSTRG.1217:MSTRG.4483:MSTRG.17936:MSTRG.19544:MSTRG.4403:MSTRG.17155:SMESG000049967.1:MSTRG.2271:MSTRG.4208:MSTRG.16892:MSTRG.2717:MSTRG.6003:a:MSTRG.261:MSTRG.17044:MSTRG.11128:MSTRG.4536:MSTRG.5260:MSTRG.23512:MSTRG.9977:MSTRG.9898:MSTRG.22489:MSTRG.17678:MSTRG.3785:MSTRG.6271:MSTRG.7110:MSTRG.20330:MSTRG.21518:MSTRG.4666:MSTRG.2722:MSTRG.7487:MSTRG.16036:MSTRG.7450:MSTRG.5557:MSTRG.572:MSTRG.1…	egr-5:znf362:zf-4:creb3l-1:hnf4:atmin:zscan2-4:egr-2:smad1:smad9:mitfl-3:nkx2l-1:a:nkx3-2:nr2f1:gtf2b-4:kdm5b:ctcf:zfp-10:zfp677:smad4-1:snail-1:snail-2:six3:six6-2:six6-3:znf333-2:znf207:zeb-1:znf143:zic-1:zic-2:irx-1:irx6-1:irx6-2:irx6-3:onecut-4:rxra:pou2/3-1:pou2/3-2	26	MSTRG.7896:MSTRG.7998:MSTRG.23420:MSTRG.4288:MSTRG.4289:MSTRG.22163:MSTRG.16827:MSTRG.9571:MSTRG.624:MSTRG.11386:MSTRG.22087:MSTRG.10044:MSTRG.5025:MSTRG.20458:MSTRG.19091:MSTRG.2484:MSTRG.1218:MSTRG.9193:MSTRG.2656:MSTRG.10087:MSTRG.20250:MSTRG.22990:MSTRG.23304:MSTRG.8862:MSTRG.5535:MSTRG.17691:MSTRG.7287:MSTRG.19305:MSTRG.10177:MSTRG.15979:MSTRG.7427:MSTRG.20979:MSTRG.19581:MSTRG.18805:MSTRG.8…	znf596:Lox5a:Lox5b:hinfp-1:hinfp-2:rest-1:zfp674:znf-1:znf91:znf333-1:znf652:zscan2-2:zscan2-6:rest-2:coe:egr*-2:egr4-1:egr4-2:etv4:pou-p1:foxP:gli-3:fezf2:gfi1:zfp541:zfhx3:nkx6-2:hesl-2:klf-3:klf-1:lhx1-3:lhx3:neuroD-1:fer3l-3:nr-1:nr2e1:tlx-2:pax2/5/8-1:Xfin:zfp-4:zbed-1:zf-5:pou1:zfp-7:rfx3:rfx4:rfx7:sp5:klf-2:sp6-9:sp8:yy2:zbed8:rreb1:zfp-6:zf-2:zf-8:egr-1:ovo-1:prdm13:gl:znf341:zfp-2:zfp236…	37
216	dd_Smes_g4_106	518448	518781	334	*	k27ac_pooled_april21_peak_2049	5.26738	Intron (SMEST001687001.1/MSTRG.1402, intron 1 of 1)	9	525325	526636	1312	1	MSTRG.1403	SMEST001688001.1	-6544	0.0156109	0.268909	-0.44419	-0.51159	0	0	0			ERVV-2	endogenous retrovirus group V member 2, envelope [Source:HGNC Symbol;Acc:HGNC:39051]	-	-	0	MSTRG.10887:MSTRG.7998:MSTRG.23420:MSTRG.1217:MSTRG.4483:MSTRG.17936:MSTRG.5414:MSTRG.12684:MSTRG.4288:MSTRG.4289:MSTRG.22163:MSTRG.16827:MSTRG.9571:MSTRG.624:MSTRG.11386:MSTRG.22087:MSTRG.10044:MSTRG.5025:MSTRG.20458:MSTRG.2484:MSTRG.1218:MSTRG.9193:MSTRG.9479:MSTRG.5625:MSTRG.2171:MSTRG.22528:MSTRG.19546:MSTRG.7741:MSTRG.22295:MSTRG.19765:MSTRG.3929:MSTRG.6819:MSTRG.11814:MSTRG.10087:MSTRG.2025…	arnt-1:Lox5a:Lox5b:egr-5:znf362:zf-4:tlx-1:nkx5-3:hinfp-1:hinfp-2:rest-1:zfp674:znf-1:znf91:znf333-1:znf652:zscan2-2:zscan2-6:rest-2:egr*-2:egr4-1:egr4-2:foxA(P):foxC1:foxC2:foxD1:foxD2:foxD3:foxF1 :foxF2:foxG:foxL1:foxO:pou-p1:foxP:gli-3:nkx6-2:hnf4:Hox4b:isl-1:isl-2:cbt:klf-3:klf-1:egr-2:lhx1-3:meis-1:smad1:smad9:nf-ya1:nf-ya2:nkx2l-1:nkx3-2:nkx6-1:phox:pou1:pou4-1:pou4-2:a:znf181:zbtb24:ski-1:…	50
217	dd_Smes_g4_106	525180	525471	292	*	k27ac_pooled_april21_peak_2052	4.94883	Promoter	9	525325	526636	1312	1	MSTRG.1403	SMEST001688001.1	0	0.0156109	0.268909	-0.781338	-0.432669	0	0	0			ERVV-2	endogenous retrovirus group V member 2, envelope [Source:HGNC Symbol;Acc:HGNC:39051]	MSTRG.5260:MSTRG.23512:MSTRG.9977:MSTRG.20330:MSTRG.19125:MSTRG.2385:MSTRG.22069:MSTRG.1684:SMESG000061747.1	ctcf:zfp-10:zfp677:znf333-2:prdm1-1:zfp-3:zfp878:zbed1:zscan2-7	3	MSTRG.7896:MSTRG.7998:MSTRG.23420:MSTRG.10410:SMESG000022963.1:MSTRG.12684:MSTRG.2221:MSTRG.14008:MSTRG.2484:MSTRG.1218:MSTRG.9193:MSTRG.10604:MSTRG.11379:MSTRG.22994:MSTRG.4327:MSTRG.2656:MSTRG.2731:MSTRG.5625:MSTRG.2171:MSTRG.22528:MSTRG.19546:MSTRG.7741:MSTRG.3929:MSTRG.6819:MSTRG.11814:MSTRG.11405:MSTRG.22990:MSTRG.12700:MSTRG.8018:MSTRG.11935:MSTRG.23304:MSTRG.8862:MSTRG.5535:MSTRG.17691:MST…	znf596:Lox5a:Lox5b:bsx:barhl1:nkx5-3:dbx:dll-1:egr*-2:egr4-1:egr4-2:ets-3:ets-5:fli-2:fli-3:etv4:elf1:foxC1:foxC2:foxD1:foxD2:foxD3:foxG:foxL1:foxO:gcm-2:gli-3:gata456-1:gata456-2:gata456-4:fezf2:gfi1:zfp541:zfhx3:nkx6-2:hnf4:hesl-2:isl-1:isl-2:egr-2:lhx1-3:meox:sall4:fir1:zfp-8:zfp236-1:zfp354:znf101:znf425:znf660:lmpt-3:smad1:smad9:neuroD-1:fer3l-3:nr2f1:nr-1:nr2e1:tlx-2:onecut-1:onecut-2:onecu…	55
218	dd_Smes_g4_106	527181	527680	500	*	k27ac_pooled_april21_peak_2054	16.3002	Promoter	9	513819	527822	14004	2	MSTRG.1402	SMEST001687001.1	142	3.02384	0.33425	-0.507264	-0.466928	0	0	0	0.554621	-0.279907	SIX1	SIX homeobox 1 [Source:HGNC Symbol;Acc:HGNC:10887]	MSTRG.7427:MSTRG.18714:MSTRG.23589:MSTRG.7450:MSTRG.5557:MSTRG.572:MSTRG.18286	lhx1-3:meox:alx4:irx-1:irx6-1:irx6-2:irx6-3	4	MSTRG.7896:MSTRG.10410:MSTRG.12684:MSTRG.19544:MSTRG.4288:MSTRG.4289:MSTRG.22163:MSTRG.16827:MSTRG.9571:MSTRG.624:MSTRG.11386:MSTRG.22087:MSTRG.10044:MSTRG.5025:MSTRG.2221:MSTRG.2484:MSTRG.1218:MSTRG.9193:MSTRG.10087:MSTRG.20250:MSTRG.22990:MSTRG.23304:MSTRG.8862:MSTRG.5535:MSTRG.17691:MSTRG.3741:MSTRG.4403:MSTRG.13843:MSTRG.19305:MSTRG.7792:MSTRG.6856:MSTRG.10592:MSTRG.12851:MSTRG.17155:SMESG000…	znf596:bsx:nkx5-3:creb3l-1:hinfp-1:hinfp-2:rest-1:zfp674:znf-1:znf91:znf333-1:znf652:zscan2-2:zscan2-6:dbx:egr*-2:egr4-1:egr4-2:pou-p1:foxP:gli-3:fezf2:gfi1:zfp541:zfhx3:hesl-3:hnf4:Hox4b:hesl-2:nkx3-1:nkx5-2:nkx5-1:nerfin2-1:atmin:zscan2-4:lhx2-3:lmx1-1:lhx1-1:lhx1-4:meis-1:musculin:msx:smad1:smad9:myoD:nf-ya1:nf-ya2:nr2f1:nr-1:nr2e1:tlx-2:hr51:onecut-1:onecut-2:onecut-3:onecut-5:hnf6:cux-2:pax2…	72
219	dd_Smes_g4_106	528169	528661	493	*	k27ac_pooled_april21_peak_2055	8.39403	Promoter	9	516143	527822	11680	2	MSTRG.1402	MSTRG.1402.2	-347	3.02384	0.33425	-0.813723	-0.507859	0	0	0	0.554621	-0.279907	SIX1	SIX homeobox 1 [Source:HGNC Symbol;Acc:HGNC:10887]	MSTRG.7427:MSTRG.18714:MSTRG.23589:MSTRG.7450:MSTRG.5557:MSTRG.572:MSTRG.18286	lhx1-3:meox:alx4:irx-1:irx6-1:irx6-2:irx6-3	4	MSTRG.7998:MSTRG.23420:MSTRG.21923:MSTRG.9638:MSTRG.5414:MSTRG.12684:MSTRG.4288:MSTRG.4289:MSTRG.22163:MSTRG.16827:MSTRG.9571:MSTRG.624:MSTRG.11386:MSTRG.22087:MSTRG.10044:MSTRG.5025:MSTRG.2221:MSTRG.14008:MSTRG.2484:MSTRG.1218:MSTRG.9193:MSTRG.23304:MSTRG.8862:MSTRG.5535:MSTRG.17691:MSTRG.16138:MSTRG.3741:MSTRG.7287:MSTRG.13843:MSTRG.19305:MSTRG.7792:MSTRG.6856:MSTRG.10592:MSTRG.12851:MSTRG.1715…	Lox5a:Lox5b:barhl2-1:barhl2-2:tlx-1:nkx5-3:hinfp-1:hinfp-2:rest-1:zfp674:znf-1:znf91:znf333-1:znf652:zscan2-2:zscan2-6:dbx:dll-1:egr*-2:egr4-1:egr4-2:fezf2:gfi1:zfp541:zfhx3:prdm14:hesl-3:nkx6-2:Hox4b:hesl-2:nkx3-1:nkx5-2:nkx5-1:nerfin2-1:atmin:zscan2-4:cbt:lhx2-3:lmx1-1:msx:smad1:smad9:mitfl-3:myoD:nf-ya1:nf-ya2:a:nr-1:nr2e1:tlx-2:hr51:onecut-1:onecut-2:onecut-3:onecut-5:hnf6:cux-2:pax2/5/8-1:pa…	64
220	dd_Smes_g4_106	716700	717050	351	*	k27ac_pooled_april21_peak_2096	4.93292	Intron (SMEST001708001.1/MSTRG.1408, intron 2 of 6)	9	715132	839046	123915	1	MSTRG.1408	MSTRG.1408.9	1568	334.1	0.308123	-0.188104	0.00310271	1	1	0	3.95962e-05	-0.505447	ALDH2	aldehyde dehydrogenase 2 family member [Source:HGNC Symbol;Acc:HGNC:404]	MSTRG.6445	musculin	1	MSTRG.10887:MSTRG.7896:MSTRG.7998:MSTRG.23420:MSTRG.19544:MSTRG.2221:MSTRG.14008:MSTRG.19091:MSTRG.11379:MSTRG.22994:MSTRG.4327:MSTRG.22528:MSTRG.19546:MSTRG.7741:MSTRG.22295:MSTRG.19765:MSTRG.3929:MSTRG.6819:MSTRG.11814:MSTRG.10087:MSTRG.20250:MSTRG.13758:MSTRG.18815:MSTRG.21195:SMESG000072873.1:MSTRG.19883:MSTRG.3843:MSTRG.5337:MSTRG.14880:MSTRG.5693:MSTRG.10837:MSTRG.18451:MSTRG.12975:MSTRG.17…	arnt-1:znf596:Lox5a:Lox5b:creb3l-1:dbx:dll-1:coe:ets-5:fli-2:fli-3:foxD1:foxD2:foxD3:foxF1 :foxF2:foxG:foxL1:foxO:pou-p1:foxP:foxN(P):foxQ/D:foxJ1-1:foxJ1-2:foxJ1-3:foxJ1-4:foxJ1-5:foxN2/3-1:foxN2/3-2:foxN2/3-3:foxK1:foxK2:foxK3:gata123:gata456-3:gcm-2:gli-3:prdm14:nkx6-2:hnf4:nkx3-1:nkx5-2:nkx5-1:isl-1:isl-2:cbt:egr-2:lhx1-3:mlx:myoD:pdp1:nf-ya1:nf-ya2:nkx3-2:nkx6-1:nr4a-1:nr4a-2:nr-1:nr2e1:tlx-…	63
221	dd_Smes_g4_106	869524	870159	636	*	k27ac_pooled_april21_peak_2108	3.92547	Promoter	9	870272	945046	74775	1	MSTRG.1412	MSTRG.1412.1	-113	3.3152	0.219191	-0.2531	-0.491344	0	0	0	0.932581	-0.0416204	PDE4D	phosphodiesterase 4D [Source:HGNC Symbol;Acc:HGNC:8783]	-	-	0	MSTRG.7896:MSTRG.7998:MSTRG.23420:MSTRG.10410:MSTRG.12684:MSTRG.4288:MSTRG.4289:MSTRG.22163:MSTRG.16827:MSTRG.9571:MSTRG.624:MSTRG.11386:MSTRG.22087:MSTRG.10044:MSTRG.5025:MSTRG.22126:SMESG000049970.1:SMESG000031904.1:MSTRG.221:MSTRG.2221:MSTRG.2484:MSTRG.1218:MSTRG.9193:MSTRG.11379:MSTRG.22994:MSTRG.4327:MSTRG.22295:MSTRG.19765:MSTRG.11405:MSTRG.20466:MSTRG.17923:MSTRG.22990:MSTRG.7287:MSTRG.440…	znf596:Lox5a:Lox5b:bsx:nkx5-3:hinfp-1:hinfp-2:rest-1:zfp674:znf-1:znf91:znf333-1:znf652:zscan2-2:zscan2-6:zfp560-1:zscan2-5:zscan2-8:zf-6:dbx:egr*-2:egr4-1:egr4-2:ets-5:fli-2:fli-3:foxF1 :foxF2:gcm-2:gli-1:gli-2:gli-3:nkx6-2:hnf4:Hox4b:hesl-2:atmin:zscan2-4:cbt:klf-1:lhx2-3:lhx1-3:Mef2-1:gtf2a1:nf-ya1:nf-ya2:otx-1:otx-2:pax2/5/8-1:Pbx-4:Prep:ctcf:zfp-10:zfp677:snail-1:snail-2:sp5:klf-2:six4:da:yy…	50
222	dd_Smes_g4_106	899530	899732	203	*	k27ac_pooled_april21_peak_2110	3.02596	Intron (MSTRG.1412.1/MSTRG.1412, intron 3 of 13)	9	905265	945046	39782	1	MSTRG.1412	MSTRG.1412.11	-5533	3.3152	0.219191	-0.431106	-0.100516	0	0	0	0.932581	-0.0416204	PDE4D	phosphodiesterase 4D [Source:HGNC Symbol;Acc:HGNC:8783]	-	-	0	MSTRG.7896:MSTRG.5414:MSTRG.12684:MSTRG.19544:MSTRG.4288:MSTRG.4289:MSTRG.22163:MSTRG.16827:MSTRG.9571:MSTRG.624:MSTRG.11386:MSTRG.22087:MSTRG.10044:MSTRG.5025:MSTRG.20458:MSTRG.2221:MSTRG.10604:MSTRG.22528:MSTRG.19546:MSTRG.7741:MSTRG.3929:MSTRG.6819:MSTRG.11814:MSTRG.10087:MSTRG.20250:MSTRG.13758:MSTRG.22990:MSTRG.16138:MSTRG.4403:MSTRG.13843:MSTRG.7792:MSTRG.6856:MSTRG.17848:MSTRG.9911:MSTRG.1…	znf596:tlx-1:nkx5-3:creb3l-1:hinfp-1:hinfp-2:rest-1:zfp674:znf-1:znf91:znf333-1:znf652:zscan2-2:zscan2-6:rest-2:dbx:ets-3:foxD1:foxD2:foxD3:foxG:foxL1:foxO:pou-p1:foxP:foxN(P):gli-3:prdm14:hnf4:Hox4b:nkx3-1:nkx5-2:isl-1:isl-2:klf-1:egr-2:lhx1-3:meis-1:smad1:smad9:myoD:neuroD-1:fer3l-3:nr2f1:pax2/5/8-1:pax6-1:pax6-2:phox:Pbx-4:Prep:pou4-1:pou4-2:rfx3:rfx4:rfx7:ctcf:zfp-10:zfp677:snail-1:snail-2:ta…	61
223	dd_Smes_g4_106	1477455	1478001	547	*	k27ac_pooled_april21_peak_2143	3.13819	Promoter	9	1475540	1477918	2379	2	MSTRG.1421	MSTRG.1421.8	0	14.0162	0.299246	-0.265643	-0.457726	1	1	1	0.00317795	-0.534589	IGSF10	immunoglobulin superfamily member 10 [Source:HGNC Symbol;Acc:HGNC:26384]	-	-	0	MSTRG.10887:MSTRG.7896:MSTRG.7998:MSTRG.23420:SMESG000022963.1:MSTRG.4288:MSTRG.4289:MSTRG.22163:MSTRG.16827:MSTRG.9571:MSTRG.624:MSTRG.11386:MSTRG.22087:MSTRG.10044:MSTRG.5025:MSTRG.14008:MSTRG.2484:MSTRG.1218:MSTRG.9193:MSTRG.9479:MSTRG.5625:MSTRG.2171:MSTRG.22528:MSTRG.19546:MSTRG.7741:MSTRG.3929:MSTRG.6819:MSTRG.11814:MSTRG.10087:MSTRG.20250:MSTRG.13758:MSTRG.18451:MSTRG.12975:MSTRG.17474:MST…	arnt-1:znf596:Lox5a:Lox5b:barhl1:hinfp-1:hinfp-2:rest-1:zfp674:znf-1:znf91:znf333-1:znf652:zscan2-2:zscan2-6:dll-1:egr*-2:egr4-1:egr4-2:foxA(P):foxC1:foxC2:foxD1:foxD2:foxD3:foxG:foxL1:foxO:pou-p1:foxP:foxN(P):foxK1:foxK2:foxK3:prdm14:hesl-3:nkx6-2:hnf4:nkx3-1:nkx5-2:isl-1:isl-2:lbx:lhx1-3:lhx3:Mef2-1:gtf2a1:Mef2-2:meis-1:mlx:sall4:fir1:zfp-8:zfp236-1:zfp354:znf101:znf425:znf660:lmpt-3:mitfl-3:my…	60
224	dd_Smes_g4_106	1477455	1478067	613	*	k27ac_pooled_april21_peak_2144	2.63308	Promoter	9	1475540	1477918	2379	2	MSTRG.1421	MSTRG.1421.8	0	14.0162	0.299246	-0.265643	-0.457726	1	1	1	0.00317795	-0.534589	IGSF10	immunoglobulin superfamily member 10 [Source:HGNC Symbol;Acc:HGNC:26384]	-	-	0	MSTRG.10887:MSTRG.7896:MSTRG.7998:MSTRG.23420:SMESG000022963.1:MSTRG.4288:MSTRG.4289:MSTRG.22163:MSTRG.16827:MSTRG.9571:MSTRG.624:MSTRG.11386:MSTRG.22087:MSTRG.10044:MSTRG.5025:MSTRG.14008:MSTRG.2484:MSTRG.1218:MSTRG.9193:MSTRG.9479:MSTRG.5625:MSTRG.2171:MSTRG.22528:MSTRG.19546:MSTRG.7741:MSTRG.3929:MSTRG.6819:MSTRG.11814:MSTRG.10087:MSTRG.20250:MSTRG.13758:MSTRG.18451:MSTRG.12975:MSTRG.17474:MST…	arnt-1:znf596:Lox5a:Lox5b:barhl1:hinfp-1:hinfp-2:rest-1:zfp674:znf-1:znf91:znf333-1:znf652:zscan2-2:zscan2-6:dll-1:egr*-2:egr4-1:egr4-2:foxA(P):foxC1:foxC2:foxD1:foxD2:foxD3:foxG:foxL1:foxO:pou-p1:foxP:foxN(P):foxK1:foxK2:foxK3:prdm14:hesl-3:nkx6-2:hnf4:nkx3-1:nkx5-2:isl-1:isl-2:lbx:lhx1-3:lhx3:Mef2-1:gtf2a1:Mef2-2:meis-1:mlx:sall4:fir1:zfp-8:zfp236-1:zfp354:znf101:znf425:znf660:lmpt-3:mitfl-3:my…	60
225	dd_Smes_g4_106	1555243	1555458	216	*	k27ac_pooled_april21_peak_2161	5.67089	Intron (MSTRG.1422.1/MSTRG.1422, intron 7 of 11)	9	1538227	1564302	26076	2	MSTRG.1422	MSTRG.1422.1	8844	1.63702	0.0928023	-0.547714	-0.621468	0	0	0	0.353767	-0.283993	EYA1	EYA transcriptional coactivator and phosphatase 1 [Source:HGNC Symbol;Acc:HGNC:3519]	MSTRG.9479:MSTRG.18451:MSTRG.12975:MSTRG.17474:MSTRG.15979:MSTRG.11197:MSTRG.22732:MSTRG.308:MSTRG.1201:MSTRG.8933:MSTRG.8827	foxA(P):foxK1:foxK2:foxK3:klf-1:egr-1:ovo-1:prdm13:gl:znf341:egr4-3	5	MSTRG.7896:MSTRG.7998:MSTRG.23420:MSTRG.5414:MSTRG.12684:MSTRG.19544:MSTRG.22528:MSTRG.19546:MSTRG.7741:MSTRG.22295:MSTRG.19765:MSTRG.3929:MSTRG.6819:MSTRG.11814:MSTRG.10087:MSTRG.20250:MSTRG.13758:MSTRG.18815:MSTRG.21195:SMESG000072873.1:MSTRG.19883:MSTRG.3843:MSTRG.5337:MSTRG.14880:MSTRG.5693:MSTRG.10837:MSTRG.23304:MSTRG.8862:MSTRG.5535:MSTRG.17691:MSTRG.16138:MSTRG.7287:MSTRG.10177:MSTRG.1469…	znf596:Lox5a:Lox5b:tlx-1:nkx5-3:creb3l-1:foxD1:foxD2:foxD3:foxF1 :foxF2:foxG:foxL1:foxO:pou-p1:foxP:foxN(P):foxQ/D:foxJ1-1:foxJ1-2:foxJ1-3:foxJ1-4:foxJ1-5:foxN2/3-1:foxN2/3-2:foxN2/3-3:fezf2:gfi1:zfp541:zfhx3:prdm14:nkx6-2:klf-3:lhx2-3:lmx1-1:lhx1-3:lhx3:msx:pou1:pou4-1:pou4-2:znf181:zbtb24:ski-1:kdm5b:shox:tal:ptf-4:Tbx-1/10:Tbx-2/3a:Tbx-2/3c:uncx:yy2:zbed8:rreb1:zfp-6:zf-2:zf-8:zeb-1:zic-1:zic-…	48
226	dd_Smes_g4_106	1555243	1555458	216	*	k27ac_pooled_april21_peak_2162	4.95	Intron (MSTRG.1422.1/MSTRG.1422, intron 7 of 11)	9	1538227	1564302	26076	2	MSTRG.1422	MSTRG.1422.1	8844	1.63702	0.0928023	-0.547714	-0.621468	0	0	0	0.353767	-0.283993	EYA1	EYA transcriptional coactivator and phosphatase 1 [Source:HGNC Symbol;Acc:HGNC:3519]	MSTRG.9479:MSTRG.18451:MSTRG.12975:MSTRG.17474:MSTRG.15979:MSTRG.11197:MSTRG.22732:MSTRG.308:MSTRG.1201:MSTRG.8933:MSTRG.8827	foxA(P):foxK1:foxK2:foxK3:klf-1:egr-1:ovo-1:prdm13:gl:znf341:egr4-3	5	MSTRG.7896:MSTRG.7998:MSTRG.23420:MSTRG.5414:MSTRG.12684:MSTRG.19544:MSTRG.22528:MSTRG.19546:MSTRG.7741:MSTRG.22295:MSTRG.19765:MSTRG.3929:MSTRG.6819:MSTRG.11814:MSTRG.10087:MSTRG.20250:MSTRG.13758:MSTRG.18815:MSTRG.21195:SMESG000072873.1:MSTRG.19883:MSTRG.3843:MSTRG.5337:MSTRG.14880:MSTRG.5693:MSTRG.10837:MSTRG.23304:MSTRG.8862:MSTRG.5535:MSTRG.17691:MSTRG.16138:MSTRG.7287:MSTRG.10177:MSTRG.1469…	znf596:Lox5a:Lox5b:tlx-1:nkx5-3:creb3l-1:foxD1:foxD2:foxD3:foxF1 :foxF2:foxG:foxL1:foxO:pou-p1:foxP:foxN(P):foxQ/D:foxJ1-1:foxJ1-2:foxJ1-3:foxJ1-4:foxJ1-5:foxN2/3-1:foxN2/3-2:foxN2/3-3:fezf2:gfi1:zfp541:zfhx3:prdm14:nkx6-2:klf-3:lhx2-3:lmx1-1:lhx1-3:lhx3:msx:pou1:pou4-1:pou4-2:znf181:zbtb24:ski-1:kdm5b:shox:tal:ptf-4:Tbx-1/10:Tbx-2/3a:Tbx-2/3c:uncx:yy2:zbed8:rreb1:zfp-6:zf-2:zf-8:zeb-1:zic-1:zic-…	48
227	dd_Smes_g4_106	1563262	1563690	429	*	k27ac_pooled_april21_peak_2165	3.29769	Promoter	9	1538227	1564302	26076	2	MSTRG.1422	MSTRG.1422.1	612	1.63702	0.0928023	-0.120737	-0.465297	0	0	0	0.353767	-0.283993	EYA1	EYA transcriptional coactivator and phosphatase 1 [Source:HGNC Symbol;Acc:HGNC:3519]	-	-	0	MSTRG.10887:MSTRG.7998:MSTRG.23420:MSTRG.23513:MSTRG.5414:MSTRG.12684:MSTRG.4288:MSTRG.4289:MSTRG.22163:MSTRG.16827:MSTRG.9571:MSTRG.624:MSTRG.11386:MSTRG.22087:MSTRG.10044:MSTRG.5025:MSTRG.2484:MSTRG.1218:MSTRG.9193:MSTRG.10604:MSTRG.11379:MSTRG.22994:MSTRG.4327:MSTRG.19528:MSTRG.2656:MSTRG.2731:MSTRG.23472:MSTRG.9479:MSTRG.5625:MSTRG.2171:MSTRG.22528:MSTRG.19546:MSTRG.7741:MSTRG.3929:MSTRG.6819…	arnt-1:Lox5a:Lox5b:e22/23:tlx-1:nkx5-3:hinfp-1:hinfp-2:rest-1:zfp674:znf-1:znf91:znf333-1:znf652:zscan2-2:zscan2-6:egr*-2:egr4-1:egr4-2:ets-3:ets-5:fli-2:fli-3:ets-1:etv4:elf1:fli-1:foxA(P):foxC1:foxC2:foxD1:foxD2:foxD3:foxG:foxL1:foxO:foxN(P):foxQ/D:foxJ1-1:foxJ1-2:foxJ1-3:foxJ1-4:foxJ1-5:foxN2/3-1:foxN2/3-2:foxN2/3-3:foxK1:foxK2:foxK3:gcm-2:gli-1:gli-2:fezf2:gfi1:zfp541:zfhx3:hesl-3:nkx6-2:Hox4…	81
228	dd_Smes_g4_106	2229513	2230195	683	*	k27ac_pooled_april21_peak_2187	10.072	Promoter	9	2230924	2231265	342	1	MSTRG.1443	MSTRG.1443.1	-729	1.9689	0.133514	-0.154744	-0.250635	0	0	0			KIAA1841	KIAA1841 [Source:HGNC Symbol;Acc:HGNC:29387]	MSTRG.19544:MSTRG.4208:MSTRG.16892:MSTRG.16922:MSTRG.20330:MSTRG.21518:MSTRG.7450:MSTRG.5557:MSTRG.572:MSTRG.18286	creb3l-1:smad1:smad9:srebp:znf333-2:znf207:irx-1:irx6-1:irx6-2:irx6-3	6	MSTRG.10887:MSTRG.5414:MSTRG.4288:MSTRG.4289:MSTRG.22163:MSTRG.16827:MSTRG.9571:MSTRG.624:MSTRG.11386:MSTRG.22087:MSTRG.10044:MSTRG.5025:MSTRG.20458:MSTRG.2221:MSTRG.19091:MSTRG.2484:MSTRG.1218:MSTRG.9193:MSTRG.22990:MSTRG.16138:MSTRG.3741:MSTRG.4403:MSTRG.19305:MSTRG.12851:MSTRG.17155:SMESG000049967.1:MSTRG.7427:MSTRG.372:MSTRG.2717:MSTRG.14130:MSTRG.3824:MSTRG.261:MSTRG.17044:MSTRG.8071:MSTRG.2…	arnt-1:tlx-1:hinfp-1:hinfp-2:rest-1:zfp674:znf-1:znf91:znf333-1:znf652:zscan2-2:zscan2-6:rest-2:dbx:coe:egr*-2:egr4-1:egr4-2:gli-3:prdm14:hesl-3:hnf4:hesl-2:nerfin2-1:atmin:zscan2-4:lhx1-3:mlx:mitfl-3:nf-ya1:nf-ya2:nkx3-2:nr2f1:nr-1:nr2e1:tlx-2:pax2/5/8-1:Pbx-4:Prep:Xfin:zfp-4:zbed-1:zf-5:pou4-1:pou4-2:a:zfp-7:kdm5b:scratch-like:smad4-1:sp5:sp6-9:sp8:six4:mitfl-2:ptf-5:rreb1:zfp-6:zf-2:zf-8:znf14…	46
229	dd_Smes_g4_106	2232836	2233481	646	*	k27ac_pooled_april21_peak_2189	3.5597	Promoter	9	2231462	2232773	1312	2	MSTRG.1441	SMEST001635001.1	-63	264.424	0.306404	-0.225777	-0.256193	1	1	1	0.000779249	-0.520117	RHOA	ras homolog family member A [Source:HGNC Symbol;Acc:HGNC:667]	MSTRG.19544:MSTRG.3741:MSTRG.18649:MSTRG.4755:MSTRG.22489:MSTRG.17678:MSTRG.9925:MSTRG.12623:MSTRG.17183:MSTRG.7450:MSTRG.5557:MSTRG.572:MSTRG.18286:MSTRG.657	creb3l-1:hesl-3:Pbx-4:Prep:snail-1:snail-2:six4:yy2:zbed8:irx-1:irx6-1:irx6-2:irx6-3:twist	9	MSTRG.7896:MSTRG.7998:MSTRG.23420:MSTRG.23513:MSTRG.1217:MSTRG.4483:MSTRG.17936:MSTRG.12684:MSTRG.4288:MSTRG.4289:MSTRG.22163:MSTRG.16827:MSTRG.9571:MSTRG.624:MSTRG.11386:MSTRG.22087:MSTRG.10044:MSTRG.5025:MSTRG.20458:MSTRG.2221:MSTRG.2731:MSTRG.9479:MSTRG.5625:MSTRG.2171:MSTRG.10087:MSTRG.20250:MSTRG.11405:MSTRG.7287:MSTRG.13843:MSTRG.23578:MSTRG.20904:MSTRG.9913:MSTRG.12851:MSTRG.2271:MSTRG.742…	znf596:Lox5a:Lox5b:e22/23:egr-5:znf362:zf-4:nkx5-3:hinfp-1:hinfp-2:rest-1:zfp674:znf-1:znf91:znf333-1:znf652:zscan2-2:zscan2-6:rest-2:dbx:elf1:foxA(P):foxC1:foxC2:pou-p1:foxP:gcm-2:nkx6-2:Hox4b:Hox1:Hox4a:Hox3a:nerfin2-1:egr-2:lhx1-3:Mef2-1:gtf2a1:Mef2-2:meis-1:meox:mitfl-3:myoD:neuroD-1:fer3l-3:pdp1:a:nr2f1:nr-1:nr2e1:tlx-2:neuroD-2:olig:pitx:zfp-7:rfx3:rfx4:rfx7:smad4-1:tal:ptf-4:Tbx-1/10:Tbx-2…	55
230	dd_Smes_g4_107	483185	483467	283	*	k27ac_pooled_april21_peak_2191	2.75137	Promoter	10	482193	526471	44279	1	MSTRG.1455	MSTRG.1455.3	992	39.2944	0.439666	-0.0276325	0.0961558	1	1	0	4.06907e-06	0.637619	PRKAG1	protein kinase AMP-activated non-catalytic subunit gamma 1 [Source:HGNC Symbol;Acc:HGNC:9385]	-	-	0	MSTRG.7896:MSTRG.7998:MSTRG.23420:MSTRG.10410:SMESG000022963.1:MSTRG.12684:MSTRG.2221:MSTRG.14008:MSTRG.10604:MSTRG.5081:MSTRG.11379:MSTRG.22994:MSTRG.4327:MSTRG.19528:MSTRG.2656:MSTRG.2731:MSTRG.23472:MSTRG.9479:MSTRG.11405:MSTRG.7287:MSTRG.4403:MSTRG.23578:MSTRG.20904:MSTRG.9913:MSTRG.18888:MSTRG.12466:MSTRG.7427:MSTRG.20979:MSTRG.18714:MSTRG.6954:MSTRG.4208:MSTRG.16892:a:MSTRG.764:MSTRG.8071:M…	znf596:Lox5a:Lox5b:bsx:barhl1:nkx5-3:dbx:dll-1:ets-3:emx1:ets-5:fli-2:fli-3:ets-1:etv4:elf1:fli-1:foxA(P):gcm-2:nkx6-2:hnf4:Hox1:Hox4a:Hox3a:lbx:lmx1-1:lhx1-3:lhx3:meox:msx:smad1:smad9:a:nkx6-1:nr-1:nr2e1:tlx-2:onecut-1:onecut-2:onecut-3:onecut-5:hnf6:cux-2:scratch-like:smad4-1:klf-2:Tbx-1/10:Tbx-20:Tbx-2/3a:Tbx-2/3c:znf143:zic-1:zic-2:egr-1:ovo-1:prdm13:gl:znf341:prdm15:zfp112:zfp408:znf486:Lox4…	50
231	dd_Smes_g4_107	483185	483467	283	*	k27ac_pooled_april21_peak_2192	2.45952	Promoter	10	482193	526471	44279	1	MSTRG.1455	MSTRG.1455.3	992	39.2944	0.439666	-0.0276325	0.0961558	1	1	0	4.06907e-06	0.637619	PRKAG1	protein kinase AMP-activated non-catalytic subunit gamma 1 [Source:HGNC Symbol;Acc:HGNC:9385]	-	-	0	MSTRG.7896:MSTRG.7998:MSTRG.23420:MSTRG.10410:SMESG000022963.1:MSTRG.12684:MSTRG.2221:MSTRG.14008:MSTRG.10604:MSTRG.5081:MSTRG.11379:MSTRG.22994:MSTRG.4327:MSTRG.19528:MSTRG.2656:MSTRG.2731:MSTRG.23472:MSTRG.9479:MSTRG.11405:MSTRG.7287:MSTRG.4403:MSTRG.23578:MSTRG.20904:MSTRG.9913:MSTRG.18888:MSTRG.12466:MSTRG.7427:MSTRG.20979:MSTRG.18714:MSTRG.6954:MSTRG.4208:MSTRG.16892:a:MSTRG.764:MSTRG.8071:M…	znf596:Lox5a:Lox5b:bsx:barhl1:nkx5-3:dbx:dll-1:ets-3:emx1:ets-5:fli-2:fli-3:ets-1:etv4:elf1:fli-1:foxA(P):gcm-2:nkx6-2:hnf4:Hox1:Hox4a:Hox3a:lbx:lmx1-1:lhx1-3:lhx3:meox:msx:smad1:smad9:a:nkx6-1:nr-1:nr2e1:tlx-2:onecut-1:onecut-2:onecut-3:onecut-5:hnf6:cux-2:scratch-like:smad4-1:klf-2:Tbx-1/10:Tbx-20:Tbx-2/3a:Tbx-2/3c:znf143:zic-1:zic-2:egr-1:ovo-1:prdm13:gl:znf341:prdm15:zfp112:zfp408:znf486:Lox4…	50
232	dd_Smes_g4_107	894064	894427	364	*	k27ac_pooled_april21_peak_2197	7.68082	Distal Intergenic	10	879053	879459	407	1	MSTRG.1459	MSTRG.1459.1	15011	1.56118	0.73379	-0.127535	-0.461424	0	0	0			CCNI2	cyclin I family member 2 [Source:HGNC Symbol;Acc:HGNC:33869]	-	-	0	MSTRG.9597:MSTRG.6974:MSTRG.7998:MSTRG.23420:MSTRG.21923:MSTRG.9638:MSTRG.12684:MSTRG.19544:MSTRG.4288:MSTRG.4289:MSTRG.22163:MSTRG.16827:MSTRG.9571:MSTRG.624:MSTRG.11386:MSTRG.22087:MSTRG.10044:MSTRG.5025:MSTRG.2484:MSTRG.1218:MSTRG.9193:MSTRG.11379:MSTRG.22994:MSTRG.4327:MSTRG.19528:MSTRG.2731:MSTRG.23472:MSTRG.5625:MSTRG.2171:MSTRG.22528:MSTRG.19546:MSTRG.7741:MSTRG.22295:MSTRG.19765:MSTRG.392…	pax3/7-1:alx3-2:Lox5a:Lox5b:barhl2-1:barhl2-2:nkx5-3:creb3l-1:hinfp-1:hinfp-2:rest-1:zfp674:znf-1:znf91:znf333-1:znf652:zscan2-2:zscan2-6:egr*-2:egr4-1:egr4-2:ets-5:fli-2:fli-3:ets-1:elf1:fli-1:foxC1:foxC2:foxD1:foxD2:foxD3:foxF1 :foxF2:foxG:foxL1:foxO:pou-p1:foxP:foxN(P):foxQ/D:foxJ1-1:foxJ1-2:foxJ1-3:foxJ1-4:foxJ1-5:foxN2/3-1:foxN2/3-2:foxN2/3-3:foxK1:foxK2:foxK3:gli-1:gli-2:fezf2:gfi1:zfp541:z…	74
233	dd_Smes_g4_107	1022892	1023564	673	*	k27ac_pooled_april21_peak_2208	6.21385	Promoter	10	1022842	1024860	2019	1	MSTRG.1465	MSTRG.1465.2	50	4.73277	0.74321	-0.441646	-0.0285113	0	0	0			MYO3A	myosin IIIA [Source:HGNC Symbol;Acc:HGNC:7601]	-	-	0	MSTRG.9597:MSTRG.6974:MSTRG.7998:MSTRG.23420:SMESG000022963.1:MSTRG.1217:MSTRG.4483:MSTRG.17936:MSTRG.12684:MSTRG.22126:SMESG000049970.1:SMESG000031904.1:MSTRG.221:MSTRG.2221:MSTRG.14008:MSTRG.11379:MSTRG.22994:MSTRG.4327:MSTRG.19528:MSTRG.23472:MSTRG.9479:MSTRG.5625:MSTRG.2171:MSTRG.22295:MSTRG.19765:MSTRG.10087:MSTRG.20250:MSTRG.22990:MSTRG.7287:MSTRG.13843:MSTRG.17155:SMESG000049967.1:MSTRG.10…	pax3/7-1:alx3-2:Lox5a:Lox5b:barhl1:egr-5:znf362:zf-4:nkx5-3:zfp560-1:zscan2-5:zscan2-8:zf-6:dbx:dll-1:ets-5:fli-2:fli-3:ets-1:fli-1:foxA(P):foxC1:foxC2:foxF1 :foxF2:pou-p1:foxP:gli-3:nkx6-2:Hox4b:atmin:zscan2-4:cbt:klf-1:lbx:lhx1-3:lhx3:Mef2-1:gtf2a1:Mef2-2:mlx:smad1:smad9:myoD:nf-ya1:nf-ya2:nkx2l-1:nkx3-2:nr2f1:nr-1:nr2e1:tlx-2:hr51:onecut-1:onecut-2:onecut-3:onecut-5:hnf6:cux-2:pax6-1:pax6-2:Pr…	66
234	dd_Smes_g4_107	1225192	1225430	239	*	k27ac_pooled_april21_peak_2218	9.25126	Intron (SMEST001774001.1/MSTRG.1469, intron 1 of 4)	10	1223506	1230025	6520	1	MSTRG.1469	MSTRG.1469.2	1686	0.083154	0.058731	-0.344458	-1.04997	0	0	0			LHX9	LIM homeobox 9 [Source:HGNC Symbol;Acc:HGNC:14222]	-	-	0	MSTRG.10887:MSTRG.7896:MSTRG.23513:SMESG000022963.1:MSTRG.5414:MSTRG.4288:MSTRG.4289:MSTRG.22163:MSTRG.16827:MSTRG.9571:MSTRG.624:MSTRG.11386:MSTRG.22087:MSTRG.10044:MSTRG.5025:MSTRG.20458:MSTRG.2484:MSTRG.1218:MSTRG.9193:MSTRG.5081:MSTRG.19528:MSTRG.2656:MSTRG.2731:MSTRG.9479:MSTRG.20466:MSTRG.17923:MSTRG.22990:MSTRG.12700:MSTRG.8018:MSTRG.11935:MSTRG.16138:MSTRG.3741:MSTRG.19305:MSTRG.7792:MSTR…	arnt-1:znf596:e22/23:barhl1:tlx-1:hinfp-1:hinfp-2:rest-1:zfp674:znf-1:znf91:znf333-1:znf652:zscan2-2:zscan2-6:rest-2:egr*-2:egr4-1:egr4-2:emx1:ets-1:etv4:elf1:foxA(P):gli-1:gli-2:gli-3:gata456-1:gata456-2:gata456-4:prdm14:hesl-3:hesl-2:nkx3-1:nkx5-2:nkx5-1:isl-1:isl-2:egr-2:lbx:lhx2-3:lhx1-3:lhx3:meis-1:msx:sall4:fir1:zfp-8:zfp236-1:zfp354:znf101:znf425:znf660:lmpt-3:smad1:smad9:mitfl-3:myoD:neur…	67
235	dd_Smes_g4_107	1308939	1309543	605	*	k27ac_pooled_april21_peak_2230	14.127	Promoter	10	1309247	1309912	666	1	MSTRG.1476	SMEST001793002.1	0	15.9714	0.186886	-0.204876	-0.101166	1	1	1	0.0341132	0.63363	FYCO1	FYVE and coiled-coil domain autophagy adaptor 1 [Source:HGNC Symbol;Acc:HGNC:14673]	-	-	0	MSTRG.9597:MSTRG.6974:MSTRG.21923:MSTRG.9638:MSTRG.1217:MSTRG.4483:MSTRG.17936:MSTRG.5414:MSTRG.19544:MSTRG.4288:MSTRG.4289:MSTRG.22163:MSTRG.16827:MSTRG.9571:MSTRG.624:MSTRG.11386:MSTRG.22087:MSTRG.10044:MSTRG.5025:MSTRG.2221:MSTRG.11379:MSTRG.22994:MSTRG.4327:MSTRG.2731:MSTRG.23472:MSTRG.9479:MSTRG.10087:MSTRG.20250:MSTRG.13758:MSTRG.18815:MSTRG.21195:SMESG000072873.1:MSTRG.19883:MSTRG.3843:MST…	pax3/7-1:alx3-2:barhl2-1:barhl2-2:egr-5:znf362:zf-4:tlx-1:creb3l-1:hinfp-1:hinfp-2:rest-1:zfp674:znf-1:znf91:znf333-1:znf652:zscan2-2:zscan2-6:dbx:ets-5:fli-2:fli-3:elf1:fli-1:foxA(P):pou-p1:foxP:foxN(P):foxQ/D:foxJ1-1:foxJ1-2:foxJ1-3:foxJ1-4:foxJ1-5:foxN2/3-1:foxN2/3-2:foxN2/3-3:foxK1:foxK2:foxK3:gli-1:gli-2:fezf2:gfi1:zfp541:zfhx3:hnf4:hesl-2:nkx3-1:nkx5-2:nkx5-1:Hox1:Hox4a:Hox3a:nerfin2-1:atmi…	79
236	dd_Smes_g4_107	1920206	1920906	701	*	k27ac_pooled_april21_peak_2242	8.24748	Promoter	10	1754306	1921499	167194	2	MSTRG.1495	MSTRG.1495.1	593	5.32776	0.0485065	-0.131716	-0.0185302	0	0	0	0.249801	-0.495324	ZDHHC5	zinc finger DHHC-type palmitoyltransferase 5 [Source:HGNC Symbol;Acc:HGNC:18472]	MSTRG.11379:MSTRG.22994:MSTRG.4327:MSTRG.19528:MSTRG.2656:MSTRG.23472:MSTRG.261:MSTRG.9925:MSTRG.19539:MSTRG.20157:MSTRG.22628	ets-5:fli-2:fli-3:ets-1:etv4:fli-1:nkx3-2:six4:foxA1:foxA2:tead1	8	MSTRG.10887:MSTRG.7998:MSTRG.23420:MSTRG.23513:MSTRG.2221:MSTRG.19091:MSTRG.2484:MSTRG.1218:MSTRG.9193:MSTRG.20466:MSTRG.17923:MSTRG.22990:MSTRG.23304:MSTRG.8862:MSTRG.5535:MSTRG.17691:MSTRG.16138:MSTRG.3741:MSTRG.7287:MSTRG.4403:MSTRG.19305:MSTRG.12851:MSTRG.17155:SMESG000049967.1:MSTRG.10215:MSTRG.7427:MSTRG.2947:MSTRG.1897:MSTRG.8925:MSTRG.4330:MSTRG.14931:MSTRG.12358:MSTRG.19417:MSTRG.432:MST…	arnt-1:Lox5a:Lox5b:e22/23:dbx:coe:egr*-2:egr4-1:egr4-2:gli-1:gli-2:gli-3:fezf2:gfi1:zfp541:zfhx3:prdm14:hesl-3:nkx6-2:hnf4:hesl-2:nerfin2-1:atmin:zscan2-4:cbt:lhx1-3:Mef2-2:meis-1:sall4:fir1:zfp-8:zfp236-1:zfp354:znf101:znf425:znf660:lmpt-3:myoD:neuroD-1:fer3l-3:nf-ya1:nf-ya2:nkx6-1:nr2f1:nr4a-1:nr4a-2:hr51:neuroD-2:olig:onecut-1:onecut-2:onecut-3:onecut-5:hnf6:cux-2:pax2/5/8-1:Pbx-4:Prep:Xfin:zf…	71
237	dd_Smes_g4_107	1920868	1920906	39	*	k27ac_pooled_april21_peak_2243	5.07998	Promoter	10	1754306	1921499	167194	2	MSTRG.1495	MSTRG.1495.1	593	5.32776	0.0485065	-0.00492875	-0.0620006	0	0	0	0.249801	-0.495324	ZDHHC5	zinc finger DHHC-type palmitoyltransferase 5 [Source:HGNC Symbol;Acc:HGNC:18472]	MSTRG.11379:MSTRG.22994:MSTRG.4327:MSTRG.19528:MSTRG.2656:MSTRG.23472:MSTRG.261:MSTRG.9925:MSTRG.19539:MSTRG.20157:MSTRG.22628	ets-5:fli-2:fli-3:ets-1:etv4:fli-1:nkx3-2:six4:foxA1:foxA2:tead1	8	MSTRG.10887:MSTRG.7998:MSTRG.23420:MSTRG.23513:MSTRG.2221:MSTRG.19091:MSTRG.2484:MSTRG.1218:MSTRG.9193:MSTRG.20466:MSTRG.17923:MSTRG.22990:MSTRG.23304:MSTRG.8862:MSTRG.5535:MSTRG.17691:MSTRG.16138:MSTRG.3741:MSTRG.7287:MSTRG.4403:MSTRG.13843:MSTRG.19305:MSTRG.12851:MSTRG.17155:SMESG000049967.1:MSTRG.10215:MSTRG.7427:MSTRG.2947:MSTRG.1897:MSTRG.8925:MSTRG.4330:MSTRG.14931:MSTRG.12358:MSTRG.19417:M…	arnt-1:Lox5a:Lox5b:e22/23:dbx:coe:egr*-2:egr4-1:egr4-2:gli-1:gli-2:gli-3:fezf2:gfi1:zfp541:zfhx3:prdm14:hesl-3:nkx6-2:hnf4:Hox4b:hesl-2:nerfin2-1:atmin:zscan2-4:cbt:lhx1-3:Mef2-2:meis-1:sall4:fir1:zfp-8:zfp236-1:zfp354:znf101:znf425:znf660:lmpt-3:myoD:neuroD-1:fer3l-3:pdp1:nf-ya1:nf-ya2:nkx6-1:nr2f1:nr4a-1:nr4a-2:hr51:neuroD-2:olig:pax2/5/8-1:Pbx-4:Prep:Xfin:zfp-4:zbed-1:zf-5:a:znf181:zbtb24:ski-…	70
238	dd_Smes_g4_108	207101	207193	93	*	k27ac_pooled_april21_peak_2254	3.18912	Intron (SMEST002031001.1/MSTRG.1519, intron 18 of 23)	11	235216	247949	12734	1	MSTRG.1521	SMEST002053001.1	-28023	1.76233	0.321672	-0.473893	-0.528013	0	0	0	0.868689	-0.094964	TCTN3	tectonic family member 3 [Source:HGNC Symbol;Acc:HGNC:24519]	-	-	0	MSTRG.7998:MSTRG.23420:MSTRG.21923:MSTRG.9638:MSTRG.5414:MSTRG.12684:MSTRG.19544:MSTRG.4288:MSTRG.4289:MSTRG.22163:MSTRG.16827:MSTRG.9571:MSTRG.624:MSTRG.11386:MSTRG.22087:MSTRG.10044:MSTRG.5025:MSTRG.20458:MSTRG.19091:MSTRG.10604:MSTRG.11379:MSTRG.22994:MSTRG.4327:MSTRG.19528:MSTRG.2656:MSTRG.2731:MSTRG.23472:MSTRG.18815:MSTRG.21195:SMESG000072873.1:MSTRG.19883:MSTRG.3843:MSTRG.5337:MSTRG.14880:…	Lox5a:Lox5b:barhl2-1:barhl2-2:tlx-1:nkx5-3:creb3l-1:hinfp-1:hinfp-2:rest-1:zfp674:znf-1:znf91:znf333-1:znf652:zscan2-2:zscan2-6:rest-2:coe:ets-3:ets-5:fli-2:fli-3:ets-1:etv4:elf1:fli-1:foxQ/D:foxJ1-1:foxJ1-2:foxJ1-3:foxJ1-4:foxJ1-5:foxN2/3-1:foxN2/3-2:foxN2/3-3:gcm-2:gli-1:gli-2:fezf2:gfi1:zfp541:zfhx3:prdm14:hesl-3:nkx6-2:hnf4:Hox4b:hesl-2:Hox1:Hox4a:nerfin2-1:egr-2:lhx2-3:lmx1-1:lhx1-3:Mef2-1:g…	71
239	dd_Smes_g4_108	241785	242369	585	*	k27ac_pooled_april21_peak_2255	7.63391	Promoter	11	241791	247949	6159	1	MSTRG.1521	MSTRG.1521.3	0	1.76233	0.321672	-0.336356	-0.208416	0	0	0	0.868689	-0.094964	TCTN3	tectonic family member 3 [Source:HGNC Symbol;Acc:HGNC:24519]	-	-	0	MSTRG.7896:MSTRG.10410:SMESG000022963.1:MSTRG.12684:MSTRG.4288:MSTRG.4289:MSTRG.22163:MSTRG.16827:MSTRG.9571:MSTRG.624:MSTRG.11386:MSTRG.22087:MSTRG.10044:MSTRG.5025:MSTRG.20458:MSTRG.14008:MSTRG.2484:MSTRG.1218:MSTRG.9193:MSTRG.10604:MSTRG.5081:MSTRG.11379:MSTRG.22994:MSTRG.4327:MSTRG.19528:MSTRG.2656:MSTRG.2731:MSTRG.23472:MSTRG.4403:MSTRG.13843:MSTRG.12851:MSTRG.17155:SMESG000049967.1:MSTRG.10…	znf596:bsx:barhl1:nkx5-3:hinfp-1:hinfp-2:rest-1:zfp674:znf-1:znf91:znf333-1:znf652:zscan2-2:zscan2-6:rest-2:dll-1:egr*-2:egr4-1:egr4-2:ets-3:emx1:ets-5:fli-2:fli-3:ets-1:etv4:elf1:fli-1:hnf4:Hox4b:nerfin2-1:atmin:zscan2-4:cbt:klf-3:klf-1:egr-2:lhx2-1:lhx2-4:lhx2-3:lhx1-1:lhx1-4:Mef2-1:gtf2a1:Mef2-2:meis-1:msx:nf-ya1:nf-ya2:nkx2l-1:a:nr2f1:nr-1:nr2e1:tlx-2:hr51:Pbx-4:Prep:Xfin:zfp-4:zbed-1:zf-5:zn…	68
240	dd_Smes_g4_108	250171	250345	175	*	k27ac_pooled_april21_peak_2259	6.14915	Intron (MSTRG.1520.1/MSTRG.1520, intron 4 of 5)	11	182641	252858	70218	2	MSTRG.1520	MSTRG.1520.1	2513	57.8428	0.327931	-0.0692418	-0.134717	0	0	0	0.227562	-0.187311	-	-	MSTRG.9597:MSTRG.7998:MSTRG.23420:MSTRG.4288:MSTRG.4289:MSTRG.22163:MSTRG.16827:MSTRG.9571:MSTRG.624:MSTRG.11386:MSTRG.22087:MSTRG.10044:MSTRG.5025:MSTRG.2484:MSTRG.1218:MSTRG.9193:MSTRG.10604:MSTRG.11379:MSTRG.22994:MSTRG.4327:MSTRG.19528:MSTRG.2656:MSTRG.2731:MSTRG.23472:MSTRG.9479:MSTRG.5625:MSTRG.2171:MSTRG.11405:MSTRG.20466:MSTRG.17923:MSTRG.22990:MSTRG.7287:MSTRG.23578:MSTRG.20904:MSTRG.991…	pax3/7-1:Lox5a:Lox5b:hinfp-1:hinfp-2:rest-1:zfp674:znf-1:znf91:znf333-1:znf652:zscan2-2:zscan2-6:egr*-2:egr4-1:egr4-2:ets-3:ets-5:fli-2:fli-3:ets-1:etv4:elf1:fli-1:foxA(P):foxC1:foxC2:gcm-2:gli-1:gli-2:gli-3:nkx6-2:Hox1:Hox4a:Hox3a:nerfin2-1:atmin:zscan2-4:klf-3:lhx2-1:lhx2-4:lhx1-3:meis-1:sall4:fir1:zfp-8:zfp236-1:zfp354:znf101:znf425:znf660:lmpt-3:pax2/5/8-1:a:zfp-7:kdm5b:ctcf:zfp-10:zfp677:klf…	43	MSTRG.10887:MSTRG.10410:MSTRG.19544:MSTRG.12700:MSTRG.8018:MSTRG.11935:MSTRG.3741:MSTRG.13843:MSTRG.19305:MSTRG.7792:MSTRG.6856:MSTRG.10592:MSTRG.10215:MSTRG.15979:MSTRG.372:MSTRG.6445:MSTRG.4208:MSTRG.16892:MSTRG.2717:MSTRG.11214:MSTRG.764:MSTRG.17044:MSTRG.10065:MSTRG.8421:MSTRG.18649:MSTRG.4755:MSTRG.3565:MSTRG.7049:MSTRG.19418:MSTRG.20936:MSTRG.9027:MSTRG.7606:MSTRG.15425:MSTRG.19918:MSTRG.16…	arnt-1:bsx:creb3l-1:gata456-1:gata456-2:gata456-4:hesl-3:Hox4b:hesl-2:nkx3-1:nkx5-2:nkx5-1:cbt:klf-1:mlx:musculin:smad1:smad9:mitfl-3:myoD:nkx6-1:nr2f1:otx-1:otx-2:Pbx-4:Prep:Xfin:zfp-4:zbed-1:zf-5:scratch-like:sp5:sp6-9:sp8:srebp:six4:tal:ptf-4:da:ap4-1:mitfl-2:ptf-5:znf143:prdm15:zfp112:zfp408:znf486:osr-1:osr-2:znf180:zscan2-3:twist:rxra	38
241	dd_Smes_g4_108	311926	312262	337	*	k27ac_pooled_april21_peak_2265	2.83706	Intron (SMEST002146001.1/MSTRG.1517, intron 5 of 11)	11	292450	329833	37384	1	MSTRG.1517	MSTRG.1517.5	19476	2.44554	0.0913025	-0.246369	-0.530918	0	0	0	0.946452	-0.0350099	RAPH1	Ras association (RalGDS/AF-6) and pleckstrin homology domains 1 [Source:HGNC Symbol;Acc:HGNC:14436]	-	-	0	MSTRG.10887:MSTRG.7998:MSTRG.23420:MSTRG.5414:MSTRG.20458:MSTRG.2221:MSTRG.2484:MSTRG.1218:MSTRG.9193:MSTRG.10604:MSTRG.5081:MSTRG.19528:MSTRG.2656:MSTRG.2731:MSTRG.9479:MSTRG.22528:MSTRG.19546:MSTRG.7741:MSTRG.22295:MSTRG.19765:MSTRG.3929:MSTRG.6819:MSTRG.11814:MSTRG.10087:MSTRG.20250:MSTRG.13758:MSTRG.18815:MSTRG.21195:SMESG000072873.1:MSTRG.19883:MSTRG.3843:MSTRG.5337:MSTRG.14880:MSTRG.5693:MS…	arnt-1:Lox5a:Lox5b:tlx-1:rest-2:dbx:egr*-2:egr4-1:egr4-2:ets-3:emx1:ets-1:etv4:elf1:foxA(P):foxD1:foxD2:foxD3:foxF1 :foxF2:foxG:foxL1:foxO:pou-p1:foxP:foxN(P):foxQ/D:foxJ1-1:foxJ1-2:foxJ1-3:foxJ1-4:foxJ1-5:foxN2/3-1:foxN2/3-2:foxN2/3-3:foxK1:foxK2:foxK3:gata123:gata456-3:gli-3:nkx6-2:Hox3a:atmin:zscan2-4:cbt:klf-3:egr-2:lbx:lhx2-1:lhx2-4:lhx1-3:lhx3:Mef2-1:gtf2a1:meis-1:musculin:sall4:fir1:zfp-8:…	76
242	dd_Smes_g4_108	322699	322940	242	*	k27ac_pooled_april21_peak_2268	3.66599	Intron (SMEST002146001.1/MSTRG.1517, intron 10 of 11)	11	292450	329833	37384	1	MSTRG.1517	MSTRG.1517.5	30249	2.44554	0.0913025	-0.66106	-0.633013	0	0	0	0.946452	-0.0350099	RAPH1	Ras association (RalGDS/AF-6) and pleckstrin homology domains 1 [Source:HGNC Symbol;Acc:HGNC:14436]	MSTRG.20466:MSTRG.17923:MSTRG.2271:MSTRG.2111:MSTRG.12215:MSTRG.21546:a:MSTRG.17627:MSTRG.21005:MSTRG.23477:MSTRG.18243:MSTRG.21518:MSTRG.8960	gli-1:gli-2:egr-2:pax2/5/8-1:pax6-1:pax6-2:a:Tbx-1/10:Tbx-20:Tbx-2/3a:Tbx-2/3c:znf207:rxra	10	MSTRG.7896:MSTRG.9597:MSTRG.6974:MSTRG.7998:MSTRG.23420:MSTRG.21923:MSTRG.9638:MSTRG.10410:MSTRG.12684:MSTRG.20458:MSTRG.2221:MSTRG.19091:MSTRG.11379:MSTRG.22994:MSTRG.4327:MSTRG.2656:MSTRG.23472:MSTRG.23309:MSTRG.9120:MSTRG.11405:MSTRG.16138:MSTRG.7287:MSTRG.13843:MSTRG.19305:MSTRG.9913:MSTRG.12851:MSTRG.17155:SMESG000049967.1:MSTRG.10215:MSTRG.15979:MSTRG.18888:MSTRG.1469:MSTRG.13692:MSTRG.5965…	znf596:pax3/7-1:alx3-2:Lox5a:Lox5b:barhl2-1:barhl2-2:bsx:nkx5-3:rest-2:dbx:coe:ets-5:fli-2:fli-3:etv4:fli-1:gata123:gata456-3:gcm-2:prdm14:nkx6-2:Hox4b:hesl-2:Hox3a:nerfin2-1:atmin:zscan2-4:cbt:klf-1:lbx:lhx2-3:lhx1-1:lhx1-4:lhx1-3:lhx3:meis-1:mlx:msx:sall4:fir1:zfp-8:zfp236-1:zfp354:znf101:znf425:znf660:lmpt-3:mitfl-3:myoD:nr4a-1:nr4a-2:otx-1:otx-2:phox:pitx:Xfin:zfp-4:zbed-1:zf-5:zfp-7:ctcf:zfp…	71
243	dd_Smes_g4_108	322699	323008	310	*	k27ac_pooled_april21_peak_2269	6.98109	Intron (SMEST002146001.1/MSTRG.1517, intron 10 of 11)	11	292450	329833	37384	1	MSTRG.1517	MSTRG.1517.5	30249	2.44554	0.0913025	-0.35317	-0.576978	0	0	0	0.946452	-0.0350099	RAPH1	Ras association (RalGDS/AF-6) and pleckstrin homology domains 1 [Source:HGNC Symbol;Acc:HGNC:14436]	MSTRG.20466:MSTRG.17923:MSTRG.2271:MSTRG.2111:MSTRG.12215:MSTRG.21546:a:MSTRG.17627:MSTRG.21005:MSTRG.23477:MSTRG.18243:MSTRG.21518:MSTRG.8960	gli-1:gli-2:egr-2:pax2/5/8-1:pax6-1:pax6-2:a:Tbx-1/10:Tbx-20:Tbx-2/3a:Tbx-2/3c:znf207:rxra	10	MSTRG.7896:MSTRG.9597:MSTRG.6974:MSTRG.7998:MSTRG.23420:MSTRG.21923:MSTRG.9638:MSTRG.10410:MSTRG.12684:MSTRG.20458:MSTRG.2221:MSTRG.19091:MSTRG.11379:MSTRG.22994:MSTRG.4327:MSTRG.2656:MSTRG.23472:MSTRG.23309:MSTRG.9120:MSTRG.11405:MSTRG.16138:MSTRG.7287:MSTRG.13843:MSTRG.19305:MSTRG.9913:MSTRG.12851:MSTRG.17155:SMESG000049967.1:MSTRG.10215:MSTRG.15979:MSTRG.18888:MSTRG.1469:MSTRG.13692:MSTRG.5965…	znf596:pax3/7-1:alx3-2:Lox5a:Lox5b:barhl2-1:barhl2-2:bsx:nkx5-3:rest-2:dbx:coe:ets-5:fli-2:fli-3:etv4:fli-1:gata123:gata456-3:gcm-2:prdm14:nkx6-2:Hox4b:hesl-2:Hox3a:nerfin2-1:atmin:zscan2-4:cbt:klf-1:lbx:lhx2-3:lhx1-1:lhx1-4:lhx1-3:lhx3:meis-1:mlx:msx:sall4:fir1:zfp-8:zfp236-1:zfp354:znf101:znf425:znf660:lmpt-3:mitfl-3:myoD:nr4a-1:nr4a-2:otx-1:otx-2:phox:pitx:Xfin:zfp-4:zbed-1:zf-5:zfp-7:ctcf:zfp…	71
244	dd_Smes_g4_108	375904	376397	494	*	k27ac_pooled_april21_peak_2274	10.0412	Intron (SMEST002154001.1/MSTRG.1522, intron 6 of 9)	11	378656	381357	2702	1	MSTRG.1522	MSTRG.1522.5	-2259	42.3369	0.216627	-0.138239	-0.20622	0	0	0	0.801042	-0.0701643	LASP1	LIM and SH3 protein 1 [Source:HGNC Symbol;Acc:HGNC:6513]	MSTRG.14130:MSTRG.3824	nf-ya1:nf-ya2	1	MSTRG.21923:MSTRG.9638:MSTRG.23513:SMESG000022963.1:MSTRG.1217:MSTRG.4483:MSTRG.17936:MSTRG.12684:MSTRG.4288:MSTRG.4289:MSTRG.22163:MSTRG.16827:MSTRG.9571:MSTRG.624:MSTRG.11386:MSTRG.22087:MSTRG.10044:MSTRG.5025:MSTRG.20458:MSTRG.22126:SMESG000049970.1:SMESG000031904.1:MSTRG.221:MSTRG.2221:MSTRG.14008:MSTRG.19091:MSTRG.2484:MSTRG.1218:MSTRG.9193:MSTRG.9479:MSTRG.23309:MSTRG.9120:MSTRG.20466:MSTRG…	barhl2-1:barhl2-2:e22/23:barhl1:egr-5:znf362:zf-4:nkx5-3:hinfp-1:hinfp-2:rest-1:zfp674:znf-1:znf91:znf333-1:znf652:zscan2-2:zscan2-6:rest-2:zfp560-1:zscan2-5:zscan2-8:zf-6:dbx:dll-1:coe:egr*-2:egr4-1:egr4-2:foxA(P):gata123:gata456-3:gli-1:gli-2:gli-3:gata456-1:gata456-2:gata456-4:hnf4:hesl-2:nerfin2-1:atmin:zscan2-4:cbt:klf-3:klf-1:lbx:lmx1-1:lhx1-3:lhx3:meis-1:meox:sall4:fir1:zfp-8:zfp236-1:zfp3…	87
245	dd_Smes_g4_108	380272	380789	518	*	k27ac_pooled_april21_peak_2275	2.83706	Promoter	11	378542	379843	1302	2	MSTRG.1523	MSTRG.1523.1	-429	1.1743	0.232083	-0.216278	-0.357403	0	0	0	0.443745	0.42227	-	-	-	-	0	MSTRG.21923:MSTRG.9638:MSTRG.12684:MSTRG.4288:MSTRG.4289:MSTRG.22163:MSTRG.16827:MSTRG.9571:MSTRG.624:MSTRG.11386:MSTRG.22087:MSTRG.10044:MSTRG.5025:MSTRG.20458:MSTRG.22126:SMESG000049970.1:SMESG000031904.1:MSTRG.221:MSTRG.2221:MSTRG.19091:MSTRG.2484:MSTRG.1218:MSTRG.9193:MSTRG.10604:MSTRG.11379:MSTRG.22994:MSTRG.4327:MSTRG.23472:MSTRG.22528:MSTRG.19546:MSTRG.7741:MSTRG.3929:MSTRG.6819:MSTRG.1181…	barhl2-1:barhl2-2:nkx5-3:hinfp-1:hinfp-2:rest-1:zfp674:znf-1:znf91:znf333-1:znf652:zscan2-2:zscan2-6:rest-2:zfp560-1:zscan2-5:zscan2-8:zf-6:dbx:coe:egr*-2:egr4-1:egr4-2:ets-3:ets-5:fli-2:fli-3:fli-1:foxD1:foxD2:foxD3:foxG:foxL1:foxO:foxQ/D:foxJ1-1:foxJ1-2:foxJ1-3:foxJ1-4:foxJ1-5:foxN2/3-1:foxN2/3-2:foxN2/3-3:foxK1:foxK2:foxK3:gcm-2:gli-1:gli-2:gli-3:gata456-1:gata456-2:gata456-4:fezf2:gfi1:zfp541…	88
246	dd_Smes_g4_108	522757	523194	438	*	k27ac_pooled_april21_peak_2295	8.24748	Intron (SMEST002159001.1/MSTRG.1526, intron 4 of 4)	11	521722	528256	6535	2	MSTRG.1526	MSTRG.1526.3	5062	16.7071	0.312598	-0.149408	-0.279253	0	0	0	0.504733	-0.333691	ADRA1B	adrenoceptor alpha 1B [Source:HGNC Symbol;Acc:HGNC:278]	MSTRG.8071:MSTRG.22379:MSTRG.9335	nr-1:nr2e1:tlx-2	1	MSTRG.10887:MSTRG.7896:MSTRG.7998:MSTRG.23420:MSTRG.10410:MSTRG.4288:MSTRG.4289:MSTRG.22163:MSTRG.16827:MSTRG.9571:MSTRG.624:MSTRG.11386:MSTRG.22087:MSTRG.10044:MSTRG.5025:MSTRG.2484:MSTRG.1218:MSTRG.9193:MSTRG.10087:MSTRG.20250:MSTRG.3741:MSTRG.7287:MSTRG.4403:MSTRG.13843:MSTRG.19305:MSTRG.9913:MSTRG.15979:MSTRG.7427:MSTRG.372:MSTRG.6445:MSTRG.8925:MSTRG.4330:MSTRG.14931:MSTRG.12358:MSTRG.19417:…	arnt-1:znf596:Lox5a:Lox5b:bsx:hinfp-1:hinfp-2:rest-1:zfp674:znf-1:znf91:znf333-1:znf652:zscan2-2:zscan2-6:egr*-2:egr4-1:egr4-2:pou-p1:foxP:hesl-3:nkx6-2:hnf4:Hox4b:hesl-2:Hox3a:klf-1:lhx1-3:mlx:musculin:sall4:fir1:zfp-8:zfp236-1:zfp354:znf101:znf425:znf660:lmpt-3:smad1:smad9:mitfl-3:myoD:nf-ya1:nf-ya2:a:nkx6-1:otx-1:otx-2:pitx:zfp-7:ctcf:zfp-10:zfp677:scratch-like:smad4-1:sp5:klf-2:sp6-9:sp8:mitf…	45
247	dd_Smes_g4_108	879352	879409	58	*	k27ac_pooled_april21_peak_2309	5.89106	Intron (SMEST002199002.1/MSTRG.1546, intron 1 of 9)	11	852202	885312	33111	2	MSTRG.1546	SMEST002199002.1	5903	26.068	0.414581	-0.136983	-0.595236	0	0	0	0.496434	-0.154095	AIFM1	apoptosis inducing factor mitochondria associated 1 [Source:HGNC Symbol;Acc:HGNC:8768]	-	-	0	MSTRG.10887:MSTRG.7896:MSTRG.7998:MSTRG.23420:MSTRG.12684:MSTRG.19544:MSTRG.2221:MSTRG.19091:MSTRG.2484:MSTRG.1218:MSTRG.9193:MSTRG.10604:MSTRG.10087:MSTRG.20250:MSTRG.11405:MSTRG.20466:MSTRG.17923:MSTRG.22990:MSTRG.7287:MSTRG.4403:MSTRG.13843:MSTRG.19305:MSTRG.7792:MSTRG.6856:MSTRG.10592:MSTRG.17848:MSTRG.9911:MSTRG.17155:SMESG000049967.1:MSTRG.10215:MSTRG.15979:MSTRG.7427:MSTRG.372:MSTRG.4208:M…	arnt-1:znf596:Lox5a:Lox5b:nkx5-3:creb3l-1:dbx:coe:egr*-2:egr4-1:egr4-2:ets-3:pou-p1:foxP:gcm-2:gli-1:gli-2:gli-3:nkx6-2:hnf4:Hox4b:hesl-2:nkx3-1:nkx5-2:nkx5-1:isl-1:isl-2:atmin:zscan2-4:cbt:klf-1:lhx1-3:mlx:smad1:smad9:nf-ya1:nf-ya2:nkx2l-1:a:nkx3-2:nr4a-1:nr4a-2:hr51:onecut-1:onecut-2:onecut-3:onecut-5:hnf6:cux-2:pax2/5/8-1:pax6-1:pax6-2:kdm5b:scratch-like:sp5:klf-2:sp6-9:sp8:six3:six6-2:six6-3:…	60
248	dd_Smes_g4_108	1175131	1175540	410	*	k27ac_pooled_april21_peak_2313	3.47328	Promoter	11	1168770	1174854	6085	2	MSTRG.1561	SMEST002021002.1	-277	81.8013	0.217964	-0.216309	-0.257851	0	0	0	0.183499	0.199101	MX2	MX dynamin like GTPase 2 [Source:HGNC Symbol;Acc:HGNC:7533]	-	-	0	MSTRG.7896:MSTRG.23513:MSTRG.1217:MSTRG.4483:MSTRG.17936:MSTRG.12684:MSTRG.4288:MSTRG.4289:MSTRG.22163:MSTRG.16827:MSTRG.9571:MSTRG.624:MSTRG.11386:MSTRG.22087:MSTRG.10044:MSTRG.5025:MSTRG.2221:MSTRG.2484:MSTRG.1218:MSTRG.9193:MSTRG.11379:MSTRG.22994:MSTRG.4327:MSTRG.19528:MSTRG.2656:MSTRG.23472:MSTRG.9479:MSTRG.16138:MSTRG.4403:MSTRG.13843:MSTRG.12851:MSTRG.17155:SMESG000049967.1:MSTRG.10215:MST…	znf596:e22/23:egr-5:znf362:zf-4:nkx5-3:hinfp-1:hinfp-2:rest-1:zfp674:znf-1:znf91:znf333-1:znf652:zscan2-2:zscan2-6:dbx:egr*-2:egr4-1:egr4-2:ets-5:fli-2:fli-3:ets-1:etv4:fli-1:foxA(P):prdm14:hnf4:Hox4b:nerfin2-1:atmin:zscan2-4:cbt:klf-1:egr-2:lhx1-3:myoD:nf-ya1:nf-ya2:a:nr2f1:nr4a-1:nr4a-2:nr-1:nr2e1:tlx-2:neuroD-2:olig:otx-1:otx-2:pax2/5/8-1:pitx:Xfin:zfp-4:zbed-1:zf-5:znf181:zbtb24:ski-1:zfp-7:r…	57
249	dd_Smes_g4_108	1343672	1343926	255	*	k27ac_pooled_april21_peak_2320	8.34896	Promoter	11	1295189	1344564	49376	2	MSTRG.1549	MSTRG.1549.1	638	2.34666	0.0727196	-0.268326	-0.0215009	0	0	0	0.962982	-0.0284732	MX2	MX dynamin like GTPase 2 [Source:HGNC Symbol;Acc:HGNC:7533]	MSTRG.10604:MSTRG.11379:MSTRG.22994:MSTRG.4327:MSTRG.2656:MSTRG.2731:MSTRG.4403:MSTRG.16922:MSTRG.9925:MSTRG.17627:MSTRG.23477:MSTRG.18243:MSTRG.19125:MSTRG.2385:MSTRG.22069:MSTRG.1684:SMESG000061747.1	ets-3:ets-5:fli-2:fli-3:etv4:elf1:hnf4:srebp:six4:Tbx-1/10:Tbx-2/3a:Tbx-2/3c:prdm1-1:zfp-3:zfp878:zbed1:zscan2-7	10	MSTRG.9597:MSTRG.7998:MSTRG.23420:SMESG000022963.1:MSTRG.5414:MSTRG.12684:MSTRG.4288:MSTRG.4289:MSTRG.22163:MSTRG.16827:MSTRG.9571:MSTRG.624:MSTRG.11386:MSTRG.22087:MSTRG.10044:MSTRG.5025:MSTRG.2221:MSTRG.14008:MSTRG.2484:MSTRG.1218:MSTRG.9193:MSTRG.7287:MSTRG.17155:SMESG000049967.1:MSTRG.10215:MSTRG.10177:MSTRG.15979:MSTRG.7427:MSTRG.20979:MSTRG.1897:MSTRG.2717:MSTRG.17044:MSTRG.3166:MSTRG.7853:…	pax3/7-1:Lox5a:Lox5b:barhl1:tlx-1:nkx5-3:hinfp-1:hinfp-2:rest-1:zfp674:znf-1:znf91:znf333-1:znf652:zscan2-2:zscan2-6:dbx:dll-1:egr*-2:egr4-1:egr4-2:nkx6-2:atmin:zscan2-4:cbt:klf-3:klf-1:lhx1-3:lhx3:meis-1:mitfl-3:nr2f1:onecut-1:onecut-2:onecut-3:onecut-5:hnf6:cux-2:pou1:a:znf181:zbtb24:ski-1:kdm5b:ctcf:zfp-10:zfp677:rx:scratch-like:sp5:klf-2:sp6-9:sp8:rreb1:zfp-6:zf-2:zf-8:znf333-2:znf207:znf143:…	48
250	dd_Smes_g4_108	1427763	1428498	736	*	k27ac_pooled_april21_peak_2322	3.32302	Promoter	11	1427925	1433057	5133	1	MSTRG.1551	SMEST002045001.1	0	19.3503	0.209404	-0.29069	-0.19749	0	0	0	0.152119	0.259329	DHDH	dihydrodiol dehydrogenase [Source:HGNC Symbol;Acc:HGNC:17887]	-	-	0	MSTRG.7998:MSTRG.23420:MSTRG.10410:SMESG000022963.1:MSTRG.19544:MSTRG.4288:MSTRG.4289:MSTRG.22163:MSTRG.16827:MSTRG.9571:MSTRG.624:MSTRG.11386:MSTRG.22087:MSTRG.10044:MSTRG.5025:MSTRG.20458:MSTRG.22126:SMESG000049970.1:SMESG000031904.1:MSTRG.221:MSTRG.2484:MSTRG.1218:MSTRG.9193:MSTRG.5625:MSTRG.2171:MSTRG.10087:MSTRG.20250:MSTRG.18815:MSTRG.21195:SMESG000072873.1:MSTRG.19883:MSTRG.3843:MSTRG.5337…	Lox5a:Lox5b:bsx:barhl1:creb3l-1:hinfp-1:hinfp-2:rest-1:zfp674:znf-1:znf91:znf333-1:znf652:zscan2-2:zscan2-6:rest-2:zfp560-1:zscan2-5:zscan2-8:zf-6:egr*-2:egr4-1:egr4-2:foxC1:foxC2:pou-p1:foxP:foxQ/D:foxJ1-1:foxJ1-2:foxJ1-3:foxJ1-4:foxJ1-5:foxN2/3-1:foxN2/3-2:foxN2/3-3:gcm-2:gata456-1:gata456-2:gata456-4:hesl-3:nkx6-2:hesl-2:atmin:zscan2-4:cbt:klf-3:klf-1:lhx2-3:lhx1-3:sall4:fir1:zfp-8:zfp236-1:zf…	54
251	dd_Smes_g4_108	1449068	1449550	483	*	k27ac_pooled_april21_peak_2324	3.27269	Promoter	11	1448302	1449778	1477	1	MSTRG.1553	MSTRG.1553.8	766	52.151	0.525327	0.118969	0.00936087	0	0	0	0.847999	-0.0509074	RNASEH1	ribonuclease H1 [Source:HGNC Symbol;Acc:HGNC:18466]	-	-	0	MSTRG.10887:MSTRG.7998:MSTRG.23420:MSTRG.21923:MSTRG.9638:MSTRG.10410:SMESG000022963.1:MSTRG.12684:MSTRG.19544:MSTRG.4288:MSTRG.4289:MSTRG.22163:MSTRG.16827:MSTRG.9571:MSTRG.624:MSTRG.11386:MSTRG.22087:MSTRG.10044:MSTRG.5025:MSTRG.20458:MSTRG.2221:MSTRG.19091:MSTRG.2484:MSTRG.1218:MSTRG.9193:MSTRG.11379:MSTRG.22994:MSTRG.4327:MSTRG.19528:MSTRG.2656:MSTRG.23472:MSTRG.22528:MSTRG.19546:MSTRG.7741:M…	arnt-1:Lox5a:Lox5b:barhl2-1:barhl2-2:bsx:barhl1:nkx5-3:creb3l-1:hinfp-1:hinfp-2:rest-1:zfp674:znf-1:znf91:znf333-1:znf652:zscan2-2:zscan2-6:rest-2:dbx:coe:egr*-2:egr4-1:egr4-2:ets-5:fli-2:fli-3:ets-1:etv4:fli-1:foxD1:foxD2:foxD3:foxG:foxL1:foxO:pou-p1:foxP:foxN(P):foxQ/D:foxJ1-1:foxJ1-2:foxJ1-3:foxJ1-4:foxJ1-5:foxN2/3-1:foxN2/3-2:foxN2/3-3:foxK1:foxK2:foxK3:hesl-3:nkx6-2:nkx3-1:nkx5-2:nerfin2-1:e…	71
252	dd_Smes_g4_108	1609631	1610421	791	*	k27ac_pooled_april21_peak_2335	4.12218	Intron (SMEST002059001.1/MSTRG.1558, intron 7 of 8)	11	1596507	1598789	2283	1	MSTRG.1558	MSTRG.1558.3	13124	25.327	0.24972	-0.221885	-0.40327	0	0	0	0.137271	-0.232089	MACO1	macoilin 1 [Source:HGNC Symbol;Acc:HGNC:25572]	MSTRG.9913:MSTRG.4208:MSTRG.16892:MSTRG.6003:a:MSTRG.261:MSTRG.18649:MSTRG.4755:MSTRG.3565:MSTRG.7049:MSTRG.19418:MSTRG.20936:MSTRG.10086:MSTRG.18571:MSTRG.12572:MSTRG.17449:MSTRG.15548	Hox3a:smad1:smad9:nkx2l-1:a:nkx3-2:Pbx-4:Prep:Xfin:zfp-4:zbed-1:zf-5:da:ap4-1:ptf-5:znf180:zscan2-3	12	MSTRG.10887:MSTRG.9597:MSTRG.7998:MSTRG.23420:MSTRG.4288:MSTRG.4289:MSTRG.22163:MSTRG.16827:MSTRG.9571:MSTRG.624:MSTRG.11386:MSTRG.22087:MSTRG.10044:MSTRG.5025:MSTRG.20458:MSTRG.22126:SMESG000049970.1:SMESG000031904.1:MSTRG.221:MSTRG.19091:MSTRG.2484:MSTRG.1218:MSTRG.9193:MSTRG.2731:MSTRG.9479:MSTRG.22990:MSTRG.12700:MSTRG.8018:MSTRG.11935:MSTRG.3741:MSTRG.7287:MSTRG.4403:MSTRG.12851:MSTRG.17848:…	arnt-1:pax3/7-1:Lox5a:Lox5b:hinfp-1:hinfp-2:rest-1:zfp674:znf-1:znf91:znf333-1:znf652:zscan2-2:zscan2-6:rest-2:zfp560-1:zscan2-5:zscan2-8:zf-6:coe:egr*-2:egr4-1:egr4-2:elf1:foxA(P):gli-3:gata456-1:gata456-2:gata456-4:hesl-3:nkx6-2:hnf4:nerfin2-1:isl-1:isl-2:atmin:zscan2-4:cbt:klf-3:klf-1:egr-2:lbx:lhx1-3:lhx3:meis-1:sall4:fir1:zfp-8:zfp236-1:zfp354:znf101:znf425:znf660:lmpt-3:myoD:nf-ya1:nf-ya2:n…	71
253	dd_Smes_g4_108	1609754	1610535	782	*	k27ac_pooled_april21_peak_2336	3.9851	Intron (SMEST002059001.1/MSTRG.1558, intron 7 of 8)	11	1596507	1598789	2283	1	MSTRG.1558	MSTRG.1558.3	13247	25.327	0.24972	-0.199348	-0.278634	0	0	0	0.137271	-0.232089	MACO1	macoilin 1 [Source:HGNC Symbol;Acc:HGNC:25572]	MSTRG.9913:MSTRG.4208:MSTRG.16892:MSTRG.6003:a:MSTRG.261:MSTRG.18649:MSTRG.4755:MSTRG.3565:MSTRG.7049:MSTRG.19418:MSTRG.20936:MSTRG.10086:MSTRG.18571:MSTRG.12572:MSTRG.17449:MSTRG.15548	Hox3a:smad1:smad9:nkx2l-1:a:nkx3-2:Pbx-4:Prep:Xfin:zfp-4:zbed-1:zf-5:da:ap4-1:ptf-5:znf180:zscan2-3	12	MSTRG.10887:MSTRG.9597:MSTRG.7998:MSTRG.23420:MSTRG.4288:MSTRG.4289:MSTRG.22163:MSTRG.16827:MSTRG.9571:MSTRG.624:MSTRG.11386:MSTRG.22087:MSTRG.10044:MSTRG.5025:MSTRG.20458:MSTRG.22126:SMESG000049970.1:SMESG000031904.1:MSTRG.221:MSTRG.19091:MSTRG.2484:MSTRG.1218:MSTRG.9193:MSTRG.2731:MSTRG.9479:MSTRG.22990:MSTRG.12700:MSTRG.8018:MSTRG.11935:MSTRG.3741:MSTRG.7287:MSTRG.4403:MSTRG.12851:MSTRG.17848:…	arnt-1:pax3/7-1:Lox5a:Lox5b:hinfp-1:hinfp-2:rest-1:zfp674:znf-1:znf91:znf333-1:znf652:zscan2-2:zscan2-6:rest-2:zfp560-1:zscan2-5:zscan2-8:zf-6:coe:egr*-2:egr4-1:egr4-2:elf1:foxA(P):gli-3:gata456-1:gata456-2:gata456-4:hesl-3:nkx6-2:hnf4:nerfin2-1:isl-1:isl-2:atmin:zscan2-4:cbt:klf-3:klf-1:egr-2:lbx:lhx1-3:lhx3:meis-1:sall4:fir1:zfp-8:zfp236-1:zfp354:znf101:znf425:znf660:lmpt-3:myoD:nf-ya1:nf-ya2:n…	72
254	dd_Smes_g4_108	1686450	1686752	303	*	k27ac_pooled_april21_peak_2342	5.93815	Promoter	11	1686445	1701061	14617	1	MSTRG.1559	SMEST002069001.1	5	0.166895	0.0123224	0.147894	-0.143229	0	0	0	0.501302	-0.58981	WNT2	Wnt family member 2 [Source:HGNC Symbol;Acc:HGNC:12780]	-	-	0	MSTRG.7896:MSTRG.10410:MSTRG.12684:MSTRG.2221:MSTRG.19091:MSTRG.2484:MSTRG.1218:MSTRG.9193:MSTRG.23472:MSTRG.12700:MSTRG.8018:MSTRG.11935:MSTRG.23304:MSTRG.8862:MSTRG.5535:MSTRG.17691:MSTRG.16138:MSTRG.3741:MSTRG.19305:MSTRG.7792:MSTRG.6856:MSTRG.23578:MSTRG.20904:MSTRG.17155:SMESG000049967.1:MSTRG.10215:MSTRG.10177:MSTRG.15979:MSTRG.7427:MSTRG.1897:MSTRG.18714:MSTRG.6445:MSTRG.8925:MSTRG.4330:MS…	znf596:bsx:nkx5-3:dbx:coe:egr*-2:egr4-1:egr4-2:fli-1:gata456-1:gata456-2:gata456-4:fezf2:gfi1:zfp541:zfhx3:prdm14:hesl-3:hesl-2:nkx3-1:nkx5-2:Hox1:Hox4a:atmin:zscan2-4:cbt:klf-3:klf-1:lhx1-3:meis-1:meox:musculin:sall4:fir1:zfp-8:zfp236-1:zfp354:znf101:znf425:znf660:lmpt-3:smad1:smad9:myoD:pdp1:hr51:pax2/5/8-1:pax6-1:pax6-2:phox:Pbx-4:Xfin:zfp-4:zbed-1:zf-5:ctcf:zfp-10:zfp677:scratch-like:sp5:klf-…	57
255	dd_Smes_g4_108	1714613	1715075	463	*	k27ac_pooled_april21_peak_2347	6.00769	Intron (SMEST002070001.1/MSTRG.1560, intron 4 of 7)	11	1706890	1716477	9588	1	MSTRG.1560	MSTRG.1560.6	7723	15.7855	0.174788	-0.359332	-0.109391	0	0	0	0.880143	0.0554409	SLC30A3	solute carrier family 30 member 3 [Source:HGNC Symbol;Acc:HGNC:11014]	-	-	0	MSTRG.7896:MSTRG.9597:MSTRG.6974:SMESG000022963.1:MSTRG.5414:MSTRG.4288:MSTRG.4289:MSTRG.22163:MSTRG.16827:MSTRG.9571:MSTRG.624:MSTRG.11386:MSTRG.22087:MSTRG.10044:MSTRG.5025:MSTRG.20458:MSTRG.2221:MSTRG.14008:MSTRG.2484:MSTRG.1218:MSTRG.9193:MSTRG.11405:MSTRG.22990:MSTRG.19305:MSTRG.12851:MSTRG.17848:MSTRG.9911:MSTRG.17155:SMESG000049967.1:MSTRG.10215:MSTRG.10177:MSTRG.15979:MSTRG.2271:MSTRG.146…	znf596:pax3/7-1:alx3-2:barhl1:tlx-1:hinfp-1:hinfp-2:rest-1:zfp674:znf-1:znf91:znf333-1:znf652:zscan2-2:zscan2-6:rest-2:dbx:dll-1:egr*-2:egr4-1:egr4-2:gcm-2:gli-3:hesl-2:nerfin2-1:isl-1:isl-2:atmin:zscan2-4:cbt:klf-3:klf-1:egr-2:lhx2-3:lhx1-3:msx:sall4:fir1:zfp-8:zfp236-1:zfp354:znf101:znf425:znf660:lmpt-3:smad1:smad9:nf-ya1:nf-ya2:hr51:onecut-1:onecut-2:onecut-3:onecut-5:hnf6:cux-2:otx-1:otx-2:pa…	57
256	dd_Smes_g4_108	1754611	1754655	45	*	k27ac_pooled_april21_peak_2358	2.74511	Intron (SMEST002074001.1/MSTRG.1571, intron 12 of 22)	11	1739925	1740485	561	1	MSTRG.1567	MSTRG.1567.4	14686	186.433	0.341513	-0.418882	-0.248027	0	0	0	0.397021	-0.170091	SRP9	signal recognition particle 9 [Source:HGNC Symbol;Acc:HGNC:11304]	MSTRG.3166:MSTRG.7853:MSTRG.4161:MSTRG.1496:MSTRG.16685:MSTRG.1504	onecut-1:onecut-2:onecut-3:onecut-5:hnf6:cux-2	1	MSTRG.7896:MSTRG.7998:MSTRG.23420:MSTRG.1217:MSTRG.4483:MSTRG.17936:MSTRG.12684:MSTRG.4288:MSTRG.4289:MSTRG.22163:MSTRG.16827:MSTRG.9571:MSTRG.624:MSTRG.11386:MSTRG.22087:MSTRG.10044:MSTRG.5025:MSTRG.2221:MSTRG.19091:MSTRG.10604:MSTRG.22528:MSTRG.19546:MSTRG.7741:MSTRG.22295:MSTRG.19765:MSTRG.6819:MSTRG.11814:MSTRG.10087:MSTRG.20250:MSTRG.13758:MSTRG.7287:MSTRG.4403:MSTRG.10592:MSTRG.12851:MSTRG.…	znf596:Lox5a:Lox5b:egr-5:znf362:zf-4:nkx5-3:hinfp-1:hinfp-2:rest-1:zfp674:znf-1:znf91:znf333-1:znf652:zscan2-2:zscan2-6:dbx:coe:ets-3:foxD1:foxD2:foxD3:foxF1 :foxF2:foxL1:foxO:pou-p1:foxP:foxN(P):nkx6-2:hnf4:nkx5-1:nerfin2-1:isl-1:isl-2:lhx1-3:lhx3:myoD:nf-ya1:nf-ya2:nr2f1:nr4a-1:nr4a-2:pax2/5/8-1:Prep:pou4-1:pou4-2:a:zfp-7:rfx4:gtf2b-4:kdm5b:ctcf:zfp-10:zfp677:snail-1:snail-2:srebp:six4:da:ap4-1…	55
257	dd_Smes_g4_108	1754611	1754899	289	*	k27ac_pooled_april21_peak_2359	5.8979	Intron (SMEST002074001.1/MSTRG.1571, intron 12 of 22)	11	1739925	1740485	561	1	MSTRG.1567	MSTRG.1567.4	14686	186.433	0.341513	-0.418882	-0.248027	0	0	0	0.397021	-0.170091	SRP9	signal recognition particle 9 [Source:HGNC Symbol;Acc:HGNC:11304]	MSTRG.3166:MSTRG.7853:MSTRG.4161:MSTRG.1496:MSTRG.16685:MSTRG.1504	onecut-1:onecut-2:onecut-3:onecut-5:hnf6:cux-2	1	MSTRG.7896:MSTRG.7998:MSTRG.23420:MSTRG.1217:MSTRG.4483:MSTRG.17936:MSTRG.12684:MSTRG.4288:MSTRG.4289:MSTRG.22163:MSTRG.16827:MSTRG.9571:MSTRG.624:MSTRG.11386:MSTRG.22087:MSTRG.10044:MSTRG.5025:MSTRG.2221:MSTRG.19091:MSTRG.10604:MSTRG.22528:MSTRG.19546:MSTRG.7741:MSTRG.22295:MSTRG.19765:MSTRG.6819:MSTRG.11814:MSTRG.10087:MSTRG.20250:MSTRG.13758:MSTRG.7287:MSTRG.4403:MSTRG.10592:MSTRG.12851:MSTRG.…	znf596:Lox5a:Lox5b:egr-5:znf362:zf-4:nkx5-3:hinfp-1:hinfp-2:rest-1:zfp674:znf-1:znf91:znf333-1:znf652:zscan2-2:zscan2-6:dbx:coe:ets-3:foxD1:foxD2:foxD3:foxF1 :foxF2:foxL1:foxO:pou-p1:foxP:foxN(P):nkx6-2:hnf4:nkx5-1:nerfin2-1:isl-1:isl-2:lhx1-3:lhx3:myoD:nf-ya1:nf-ya2:nr2f1:nr4a-1:nr4a-2:pax2/5/8-1:Prep:pou4-1:pou4-2:a:zfp-7:rfx4:gtf2b-4:kdm5b:ctcf:zfp-10:zfp677:snail-1:snail-2:srebp:six4:da:ap4-1…	55
258	dd_Smes_g4_109	1210424	1210732	309	*	k27ac_pooled_april21_peak_2377	3.80338	Intron (MSTRG.1601.1/MSTRG.1601, intron 1 of 2)	12	1208987	1303196	94210	1	MSTRG.1601	MSTRG.1601.1	1437	7.44555	0.365084	-1.22169	-0.7707	0	0	0	0.357167	0.332221	APOB	apolipoprotein B [Source:HGNC Symbol;Acc:HGNC:603]	-	-	0	MSTRG.7998:MSTRG.23420:MSTRG.5414:MSTRG.12684:MSTRG.19544:MSTRG.2221:MSTRG.19091:MSTRG.2484:MSTRG.1218:MSTRG.9193:MSTRG.10604:MSTRG.11379:MSTRG.22994:MSTRG.4327:MSTRG.19528:MSTRG.2656:MSTRG.2731:MSTRG.23472:MSTRG.9479:MSTRG.5625:MSTRG.2171:MSTRG.23304:MSTRG.8862:MSTRG.5535:MSTRG.17691:MSTRG.16138:MSTRG.7287:MSTRG.13843:MSTRG.12851:MSTRG.2271:MSTRG.18888:MSTRG.7427:MSTRG.20979:MSTRG.12930:MSTRG.12…	Lox5a:Lox5b:tlx-1:nkx5-3:creb3l-1:dbx:coe:egr*-2:egr4-1:egr4-2:ets-3:ets-5:fli-2:fli-3:ets-1:etv4:elf1:fli-1:foxA(P):foxC1:foxC2:fezf2:gfi1:zfp541:zfhx3:prdm14:nkx6-2:Hox4b:nerfin2-1:egr-2:lbx:lhx1-3:lhx3:Mef2-1:gtf2a1:Mef2-2:meis-1:mitfl-3:myoD:nf-ya1:nf-ya2:nr2f1:nr-1:nr2e1:tlx-2:hr51:Prep:pou6-2:znf181:zbtb24:ski-1:zfp-7:rfx4:gtf2b-4:kdm5b:ctcf:zfp-10:zfp677:smad4-1:rreb1:zfp-6:zf-2:zf-8:znf20…	61
259	dd_Smes_g4_109	1421545	1421947	403	*	k27ac_pooled_april21_peak_2380	5.11999	Intron (MSTRG.1604.1/MSTRG.1604, intron 3 of 9)	12	1423726	1472498	48773	1	MSTRG.1604	MSTRG.1604.10	-1779	2.69483	0.3709	-0.543704	-0.711176	0	0	0	0.94278	0.0470232	FBXW10	F-box and WD repeat domain containing 10 [Source:HGNC Symbol;Acc:HGNC:1211]	-	-	0	MSTRG.7896:MSTRG.9597:MSTRG.10410:SMESG000022963.1:MSTRG.5414:MSTRG.5081:MSTRG.16138:MSTRG.3741:MSTRG.13843:MSTRG.19305:MSTRG.12851:MSTRG.7427:MSTRG.20979:MSTRG.372:MSTRG.6445:MSTRG.2717:MSTRG.11214:MSTRG.23136:MSTRG.22726:MSTRG.17998:MSTRG.4755:MSTRG.3565:MSTRG.7049:MSTRG.19418:MSTRG.20936:a:MSTRG.5349:MSTRG.6378:MSTRG.19902:MSTRG.9027:MSTRG.22489:MSTRG.17678:MSTRG.9925:MSTRG.20131:MSTRG.23258:M…	znf596:pax3/7-1:bsx:barhl1:tlx-1:emx1:prdm14:hesl-3:Hox4b:hesl-2:nerfin2-1:lhx1-3:lhx3:mlx:musculin:mitfl-3:myoD:hr51:neuroD-2:olig:Prep:Xfin:zfp-4:zbed-1:zf-5:a:znf181:zbtb24:ski-1:scratch-like:snail-1:snail-2:six4:tal:ptf-4:da:ap4-1:mitfl-2:ptf-5:vsx:yy2:zbed8:rreb1:zfp-6:zf-2:zf-8:znf333-2:znf143:zic-1:zic-2:egr-1:ovo-1:prdm13:gl:znf341:prdm15:zfp112:zfp408:znf486:alx4:irx-1:irx6-1:irx6-2:irx6…	48
260	dd_Smes_g4_109	1422181	1422214	34	*	k27ac_pooled_april21_peak_2380	5.11999	Intron (MSTRG.1604.1/MSTRG.1604, intron 3 of 9)	12	1423726	1472498	48773	1	MSTRG.1604	MSTRG.1604.10	-1512	2.69483	0.3709	-0.543704	-0.711176	0	0	0	0.94278	0.0470232	FBXW10	F-box and WD repeat domain containing 10 [Source:HGNC Symbol;Acc:HGNC:1211]	-	-	0	MSTRG.7896:MSTRG.7998:MSTRG.23420:MSTRG.5414:MSTRG.12684:MSTRG.2221:MSTRG.5081:MSTRG.16138:MSTRG.3741:MSTRG.7287:MSTRG.13843:MSTRG.19305:MSTRG.12851:MSTRG.7427:MSTRG.20979:MSTRG.372:MSTRG.6445:MSTRG.2717:MSTRG.11214:MSTRG.6003:a:MSTRG.23136:MSTRG.22726:MSTRG.17998:MSTRG.15991:MSTRG.4755:MSTRG.3565:MSTRG.7049:MSTRG.19418:MSTRG.20936:MSTRG.5349:MSTRG.6378:MSTRG.19902:MSTRG.9027:MSTRG.22489:MSTRG.17…	znf596:Lox5a:Lox5b:tlx-1:nkx5-3:dbx:emx1:prdm14:hesl-3:nkx6-2:Hox4b:hesl-2:nerfin2-1:lhx1-3:lhx3:mlx:musculin:mitfl-3:myoD:nkx2l-1:a:hr51:neuroD-2:olig:phox:Prep:Xfin:zfp-4:zbed-1:zf-5:znf181:zbtb24:ski-1:scratch-like:snail-1:snail-2:six4:tal:ptf-4:da:ap4-1:mitfl-2:ptf-5:vsx:rreb1:zfp-6:zf-2:zf-8:znf333-2:znf143:zic-1:zic-2:egr-1:ovo-1:prdm13:gl:znf341:prdm15:zfp112:zfp408:znf486:Lox4:alx4:irx-1:…	55
261	dd_Smes_g4_109	1466199	1466667	469	*	k27ac_pooled_april21_peak_2381	5.21093	Promoter	12	1466151	1475046	8896	1	MSTRG.1604	MSTRG.1604.12	48	2.69483	0.3709	-0.450681	-0.175251	0	0	0	0.94278	0.0470232	FBXW10	F-box and WD repeat domain containing 10 [Source:HGNC Symbol;Acc:HGNC:1211]	-	-	0	MSTRG.7896:MSTRG.9597:MSTRG.6974:MSTRG.12684:MSTRG.19544:MSTRG.20458:MSTRG.14008:MSTRG.19091:MSTRG.2484:MSTRG.1218:MSTRG.9193:MSTRG.22528:MSTRG.19546:MSTRG.7741:MSTRG.3929:MSTRG.6819:MSTRG.11814:MSTRG.13758:MSTRG.20466:MSTRG.17923:MSTRG.22990:MSTRG.23304:MSTRG.8862:MSTRG.5535:MSTRG.17691:MSTRG.16138:MSTRG.4403:MSTRG.13843:MSTRG.19305:MSTRG.23578:MSTRG.20904:MSTRG.9913:MSTRG.12851:MSTRG.17848:MSTR…	znf596:pax3/7-1:alx3-2:nkx5-3:creb3l-1:rest-2:dll-1:coe:egr*-2:egr4-1:egr4-2:foxD1:foxD2:foxD3:foxG:foxL1:foxO:foxN(P):gli-1:gli-2:gli-3:fezf2:gfi1:zfp541:zfhx3:prdm14:hnf4:Hox4b:hesl-2:Hox1:Hox4a:Hox3a:nerfin2-1:isl-1:isl-2:atmin:zscan2-4:cbt:klf-3:klf-1:lbx:lhx1-3:lhx3:sall4:fir1:zfp-8:zfp236-1:zfp354:znf101:znf425:znf660:lmpt-3:mitfl-3:myoD:pdp1:nf-ya1:nf-ya2:nkx2l-1:a:nkx3-2:hr51:pax2/5/8-1:p…	79
262	dd_Smes_g4_109	1584609	1584734	126	*	k27ac_pooled_april21_peak_2382	3.5134	Distal Intergenic	12	1584843	1586309	1467	2	MSTRG.1606	MSTRG.1606.1	1575	143.915	0.486684	0.0348224	0.0155826	0	0	0	0.444679	-0.123242	U2AF1	U2 small nuclear RNA auxiliary factor 1 [Source:HGNC Symbol;Acc:HGNC:12453]	-	-	0	MSTRG.10887:MSTRG.7896:MSTRG.7998:MSTRG.23420:MSTRG.5414:MSTRG.12684:MSTRG.22126:SMESG000049970.1:SMESG000031904.1:MSTRG.221:MSTRG.2221:MSTRG.2484:MSTRG.1218:MSTRG.9193:MSTRG.10604:MSTRG.10087:MSTRG.20250:MSTRG.20466:MSTRG.17923:MSTRG.22990:MSTRG.12700:MSTRG.8018:MSTRG.11935:MSTRG.23304:MSTRG.8862:MSTRG.5535:MSTRG.17691:MSTRG.3741:MSTRG.7287:MSTRG.7792:MSTRG.6856:MSTRG.10592:MSTRG.12851:MSTRG.171…	arnt-1:znf596:Lox5a:Lox5b:tlx-1:nkx5-3:zfp560-1:zscan2-5:zscan2-8:zf-6:dbx:egr*-2:egr4-1:egr4-2:ets-3:pou-p1:foxP:gli-1:gli-2:gli-3:gata456-1:gata456-2:gata456-4:fezf2:gfi1:zfp541:zfhx3:hesl-3:nkx6-2:nkx3-1:nkx5-2:nkx5-1:nerfin2-1:atmin:zscan2-4:cbt:klf-3:klf-1:lmx1-1:lhx1-3:mlx:musculin:sall4:fir1:zfp-8:zfp236-1:zfp354:znf101:znf425:znf660:lmpt-3:smad1:smad9:pdp1:a:nkx6-1:nr2f1:hr51:onecut-1:one…	75
263	dd_Smes_g4_11	664644	664675	32	*	k27ac_pooled_april21_peak_2462	2.63686	Distal Intergenic	13	677990	678523	534	2	SMESG000005884.1	SMEST005884001.1	13848	1.58036	0.424572	-0.347788	0.0465619	0	0	0			UBAP1	ubiquitin associated protein 1 [Source:HGNC Symbol;Acc:HGNC:12461]	-	-	0	MSTRG.7896:MSTRG.7998:MSTRG.23420:MSTRG.12684:MSTRG.20458:MSTRG.2221:MSTRG.12700:MSTRG.8018:MSTRG.11935:MSTRG.7287:MSTRG.4403:MSTRG.2271:MSTRG.7427:MSTRG.20979:MSTRG.1897:MSTRG.6445:MSTRG.11214:MSTRG.14130:MSTRG.3824:MSTRG.6003:a:MSTRG.764:MSTRG.3166:MSTRG.7853:MSTRG.4161:MSTRG.1496:MSTRG.16685:MSTRG.1504:MSTRG.15991:MSTRG.18649:MSTRG.4755:MSTRG.3565:MSTRG.7049:MSTRG.19418:MSTRG.20936:MSTRG.4536:…	znf596:Lox5a:Lox5b:nkx5-3:rest-2:dbx:gata456-1:gata456-2:gata456-4:nkx6-2:hnf4:egr-2:lhx1-3:lhx3:meis-1:musculin:myoD:nf-ya1:nf-ya2:nkx2l-1:a:nkx6-1:onecut-1:onecut-2:onecut-3:onecut-5:hnf6:cux-2:phox:Pbx-4:Prep:Xfin:zfp-4:zbed-1:zf-5:kdm5b:smad4-1:snail-1:snail-2:srebp:six4:tal:ptf-4:Tbx-20:da:ap4-1:ptf-5:rreb1:zfp-6:zf-2:zf-8:Lox4:alx4:egr4-3:irx-1:irx6-1:irx6-2:irx6-3:arx:meis-2:osr-1:osr-2:ot…	46
264	dd_Smes_g4_11	664644	664956	313	*	k27ac_pooled_april21_peak_2463	3.86558	Distal Intergenic	13	677990	678523	534	2	SMESG000005884.1	SMEST005884001.1	13567	1.58036	0.424572	-0.347788	0.0465619	0	0	0			UBAP1	ubiquitin associated protein 1 [Source:HGNC Symbol;Acc:HGNC:12461]	-	-	0	MSTRG.7896:MSTRG.7998:MSTRG.23420:MSTRG.12684:MSTRG.20458:MSTRG.2221:MSTRG.12700:MSTRG.8018:MSTRG.11935:MSTRG.7287:MSTRG.4403:MSTRG.2271:MSTRG.7427:MSTRG.20979:MSTRG.1897:MSTRG.6445:MSTRG.11214:MSTRG.14130:MSTRG.3824:MSTRG.6003:a:MSTRG.764:MSTRG.3166:MSTRG.7853:MSTRG.4161:MSTRG.1496:MSTRG.16685:MSTRG.1504:MSTRG.15991:MSTRG.18649:MSTRG.4755:MSTRG.3565:MSTRG.7049:MSTRG.19418:MSTRG.20936:MSTRG.4536:…	znf596:Lox5a:Lox5b:nkx5-3:rest-2:dbx:gata456-1:gata456-2:gata456-4:nkx6-2:hnf4:egr-2:lhx1-3:lhx3:meis-1:musculin:myoD:nf-ya1:nf-ya2:nkx2l-1:a:nkx6-1:onecut-1:onecut-2:onecut-3:onecut-5:hnf6:cux-2:phox:Pbx-4:Prep:Xfin:zfp-4:zbed-1:zf-5:kdm5b:smad4-1:snail-1:snail-2:srebp:six4:tal:ptf-4:Tbx-20:da:ap4-1:ptf-5:rreb1:zfp-6:zf-2:zf-8:Lox4:alx4:egr4-3:irx-1:irx6-1:irx6-2:irx6-3:arx:meis-2:osr-1:osr-2:ot…	46
265	dd_Smes_g4_11	746285	747285	1001	*	k27ac_pooled_april21_peak_2468	11.7971	Promoter	13	745729	747642	1914	1	MSTRG.1632	MSTRG.1632.7	556	8.19575	0.231022	-0.193526	-0.274613	1	1	1	0.00156918	0.619373	EPM2AIP1	EPM2A interacting protein 1 [Source:HGNC Symbol;Acc:HGNC:19735]	-	-	0	MSTRG.7896:MSTRG.7998:MSTRG.23420:MSTRG.19544:MSTRG.2484:MSTRG.1218:MSTRG.9193:MSTRG.10604:MSTRG.9479:MSTRG.5625:MSTRG.2171:MSTRG.22528:MSTRG.19546:MSTRG.7741:MSTRG.3929:MSTRG.6819:MSTRG.11814:MSTRG.10087:MSTRG.20250:MSTRG.13758:MSTRG.18815:MSTRG.21195:SMESG000072873.1:MSTRG.19883:MSTRG.3843:MSTRG.5337:MSTRG.14880:MSTRG.5693:MSTRG.10837:MSTRG.18451:MSTRG.12975:MSTRG.17474:MSTRG.20466:MSTRG.17923:…	znf596:Lox5a:Lox5b:creb3l-1:egr*-2:egr4-1:egr4-2:ets-3:foxA(P):foxC1:foxC2:foxD1:foxD2:foxD3:foxG:foxL1:foxO:pou-p1:foxP:foxN(P):foxQ/D:foxJ1-1:foxJ1-2:foxJ1-3:foxJ1-4:foxJ1-5:foxN2/3-1:foxN2/3-2:foxN2/3-3:foxK1:foxK2:foxK3:gli-1:gli-2:gli-3:fezf2:gfi1:zfp541:zfhx3:nkx6-2:Hox4b:hesl-2:nerfin2-1:isl-1:isl-2:egr-2:lhx2-3:musculin:msx:smad1:smad9:myoD:nf-ya1:nf-ya2:nkx2l-1:a:nr2f1:hr51:pax2/5/8-1:pa…	62
266	dd_Smes_g4_11	747903	748409	507	*	k27ac_pooled_april21_peak_2469	4.40562	Downstream (<=300bp)	13	745729	747642	1914	1	MSTRG.1632	MSTRG.1632.7	2174	8.19575	0.231022	-0.310632	-0.303646	1	1	1	0.00156918	0.619373	EPM2AIP1	EPM2A interacting protein 1 [Source:HGNC Symbol;Acc:HGNC:19735]	MSTRG.18649:MSTRG.4755:MSTRG.16922	Pbx-4:Prep:srebp	3	MSTRG.10887:MSTRG.7998:MSTRG.23420:MSTRG.10410:MSTRG.1217:MSTRG.4483:MSTRG.17936:MSTRG.5414:MSTRG.4288:MSTRG.4289:MSTRG.22163:MSTRG.16827:MSTRG.9571:MSTRG.624:MSTRG.11386:MSTRG.22087:MSTRG.10044:MSTRG.5025:MSTRG.20458:MSTRG.14008:MSTRG.2484:MSTRG.1218:MSTRG.9193:MSTRG.10604:MSTRG.2731:MSTRG.18451:MSTRG.12975:MSTRG.17474:MSTRG.22990:MSTRG.23304:MSTRG.8862:MSTRG.5535:MSTRG.17691:MSTRG.3741:MSTRG.72…	arnt-1:Lox5a:Lox5b:bsx:egr-5:znf362:zf-4:tlx-1:hinfp-1:hinfp-2:rest-1:zfp674:znf-1:znf91:znf333-1:znf652:zscan2-2:zscan2-6:rest-2:dll-1:egr*-2:egr4-1:egr4-2:ets-3:elf1:foxK1:foxK2:foxK3:gli-3:fezf2:gfi1:zfp541:zfhx3:hesl-3:nkx6-2:Hox4b:hesl-2:nerfin2-1:atmin:zscan2-4:cbt:klf-3:klf-1:egr-2:lbx:lhx2-3:lhx1-3:lhx3:mlx:musculin:sall4:fir1:zfp-8:zfp236-1:zfp354:znf101:znf425:znf660:lmpt-3:smad1:smad9:…	76
267	dd_Smes_g4_11	773639	773751	113	*	k27ac_pooled_april21_peak_2470	4.82535	Distal Intergenic	13	777784	787103	9320	1	MSTRG.1635	MSTRG.1635.1	-4033	3.84516	0.311624	-0.586521	-0.509901	0	0	0	0.611319	-0.355754	PHRF1	PHD and ring finger domains 1 [Source:HGNC Symbol;Acc:HGNC:24351]	-	-	0	MSTRG.10887:MSTRG.7896:MSTRG.9597:MSTRG.6974:MSTRG.7998:MSTRG.23420:MSTRG.12684:MSTRG.19544:MSTRG.20458:MSTRG.19091:MSTRG.11379:MSTRG.22994:MSTRG.4327:MSTRG.19528:MSTRG.2656:MSTRG.23472:MSTRG.9479:MSTRG.5625:MSTRG.2171:MSTRG.22528:MSTRG.19546:MSTRG.7741:MSTRG.3929:MSTRG.6819:MSTRG.11814:MSTRG.10087:MSTRG.20250:MSTRG.18815:MSTRG.21195:SMESG000072873.1:MSTRG.19883:MSTRG.3843:MSTRG.5337:MSTRG.14880:…	arnt-1:znf596:pax3/7-1:alx3-2:Lox5a:Lox5b:nkx5-3:creb3l-1:rest-2:coe:ets-5:fli-2:fli-3:ets-1:etv4:fli-1:foxA(P):foxC1:foxC2:foxD1:foxD2:foxD3:foxG:foxL1:foxO:pou-p1:foxP:foxQ/D:foxJ1-1:foxJ1-2:foxJ1-3:foxJ1-4:foxJ1-5:foxN2/3-1:foxN2/3-2:foxN2/3-3:foxK1:foxK2:foxK3:gata123:gata456-3:gcm-2:fezf2:gfi1:zfp541:zfhx3:nkx6-2:hnf4:Hox4b:nkx3-1:nkx5-2:Hox3a:nerfin2-1:atmin:zscan2-4:klf-1:egr-2:lhx2-3:lmx1…	88
268	dd_Smes_g4_11	773992	774299	308	*	k27ac_pooled_april21_peak_2470	4.82535	Distal Intergenic	13	777784	787103	9320	1	MSTRG.1635	MSTRG.1635.1	-3485	3.84516	0.311624	-0.586521	-0.509901	0	0	0	0.611319	-0.355754	PHRF1	PHD and ring finger domains 1 [Source:HGNC Symbol;Acc:HGNC:24351]	-	-	0	MSTRG.10887:MSTRG.7896:MSTRG.9597:MSTRG.6974:MSTRG.7998:MSTRG.23420:MSTRG.12684:MSTRG.19544:MSTRG.20458:MSTRG.19091:MSTRG.11379:MSTRG.22994:MSTRG.4327:MSTRG.19528:MSTRG.2656:MSTRG.23472:MSTRG.9479:MSTRG.5625:MSTRG.2171:MSTRG.22528:MSTRG.19546:MSTRG.7741:MSTRG.3929:MSTRG.6819:MSTRG.11814:MSTRG.10087:MSTRG.20250:MSTRG.18815:MSTRG.21195:SMESG000072873.1:MSTRG.19883:MSTRG.3843:MSTRG.5337:MSTRG.14880:…	arnt-1:znf596:pax3/7-1:alx3-2:Lox5a:Lox5b:nkx5-3:creb3l-1:rest-2:coe:ets-5:fli-2:fli-3:ets-1:etv4:fli-1:foxA(P):foxC1:foxC2:foxD1:foxD2:foxD3:foxG:foxL1:foxO:pou-p1:foxP:foxQ/D:foxJ1-1:foxJ1-2:foxJ1-3:foxJ1-4:foxJ1-5:foxN2/3-1:foxN2/3-2:foxN2/3-3:foxK1:foxK2:foxK3:gata123:gata456-3:gcm-2:gata456-1:gata456-2:gata456-4:nkx6-2:hnf4:Hox4b:nkx3-1:nkx5-2:Hox3a:nerfin2-1:atmin:zscan2-4:cbt:klf-3:egr-2:l…	91
269	dd_Smes_g4_11	774638	774639	2	*	k27ac_pooled_april21_peak_2470	4.82535	Distal Intergenic	13	777784	787103	9320	1	MSTRG.1635	MSTRG.1635.1	-3145	3.84516	0.311624	-0.586521	-0.509901	0	0	0	0.611319	-0.355754	PHRF1	PHD and ring finger domains 1 [Source:HGNC Symbol;Acc:HGNC:24351]	-	-	0	MSTRG.7896:MSTRG.6974:MSTRG.7998:MSTRG.23420:MSTRG.12684:MSTRG.19544:MSTRG.11379:MSTRG.22994:MSTRG.4327:MSTRG.19528:MSTRG.2656:MSTRG.2731:MSTRG.23472:MSTRG.9479:MSTRG.5625:MSTRG.2171:MSTRG.22528:MSTRG.19546:MSTRG.7741:MSTRG.3929:MSTRG.6819:MSTRG.11814:MSTRG.10087:MSTRG.20250:MSTRG.18815:MSTRG.21195:SMESG000072873.1:MSTRG.19883:MSTRG.3843:MSTRG.5337:MSTRG.14880:MSTRG.5693:MSTRG.10837:MSTRG.18451:M…	znf596:alx3-2:Lox5a:Lox5b:nkx5-3:creb3l-1:ets-5:fli-2:fli-3:ets-1:etv4:elf1:fli-1:foxA(P):foxC1:foxC2:foxD1:foxD2:foxD3:foxG:foxL1:foxO:pou-p1:foxP:foxQ/D:foxJ1-1:foxJ1-2:foxJ1-3:foxJ1-4:foxJ1-5:foxN2/3-1:foxN2/3-2:foxN2/3-3:foxK1:foxK2:foxK3:gata123:gata456-3:gcm-2:gata456-1:gata456-2:gata456-4:nkx6-2:hnf4:Hox4b:nkx3-1:nkx5-2:atmin:zscan2-4:cbt:klf-3:egr-2:lbx:lhx2-3:lmx1-1:lhx1-3:lhx3:Mef2-1:gt…	85
270	dd_Smes_g4_11	783077	783379	303	*	k27ac_pooled_april21_peak_2472	1.58868	Intron (MSTRG.1635.1/MSTRG.1635, intron 1 of 1)	13	785141	787103	1963	1	MSTRG.1635	SMEST006039001.1	-1762	3.84516	0.311624	-0.486355	-0.69058	0	0	0	0.611319	-0.355754	PHRF1	PHD and ring finger domains 1 [Source:HGNC Symbol;Acc:HGNC:24351]	-	-	0	MSTRG.7896:MSTRG.7998:MSTRG.23420:MSTRG.21923:MSTRG.9638:MSTRG.12684:MSTRG.4288:MSTRG.4289:MSTRG.22163:MSTRG.16827:MSTRG.9571:MSTRG.624:MSTRG.11386:MSTRG.22087:MSTRG.10044:MSTRG.5025:MSTRG.10604:MSTRG.9479:MSTRG.5625:MSTRG.2171:MSTRG.22528:MSTRG.19546:MSTRG.7741:MSTRG.22295:MSTRG.19765:MSTRG.3929:MSTRG.6819:MSTRG.11814:MSTRG.7287:MSTRG.7792:MSTRG.6856:MSTRG.10592:MSTRG.9913:MSTRG.12851:MSTRG.1246…	znf596:Lox5a:Lox5b:barhl2-1:barhl2-2:nkx5-3:hinfp-1:hinfp-2:rest-1:zfp674:znf-1:znf91:znf333-1:znf652:zscan2-2:zscan2-6:ets-3:foxA(P):foxC1:foxC2:foxD1:foxD2:foxD3:foxF1 :foxF2:foxG:foxL1:foxO:nkx6-2:nkx3-1:nkx5-2:nkx5-1:Hox3a:nerfin2-1:lmx1-1:lhx1-3:lhx3:meis-1:nf-ya1:nf-ya2:pax2/5/8-1:phox:znf181:zbtb24:ski-1:kdm5b:scratch-like:six4:Tbx-1/10:Tbx-2/3a:Tbx-2/3c:yy2:zbed8:znf143:zic-1:zic-2:egr-1:…	48
271	dd_Smes_g4_11	786131	786979	849	*	k27ac_pooled_april21_peak_2473	15.1308	Promoter	13	785141	787103	1963	1	MSTRG.1635	SMEST006039002.1	990	3.84516	0.311624	-0.397516	-0.520271	0	0	0	0.611319	-0.355754	PHRF1	PHD and ring finger domains 1 [Source:HGNC Symbol;Acc:HGNC:24351]	MSTRG.7792:MSTRG.6856:MSTRG.17848:MSTRG.9911	nkx3-1:nkx5-2:isl-1:isl-2	2	MSTRG.7896:MSTRG.23513:MSTRG.4288:MSTRG.4289:MSTRG.22163:MSTRG.16827:MSTRG.9571:MSTRG.624:MSTRG.11386:MSTRG.22087:MSTRG.10044:MSTRG.5025:MSTRG.19091:MSTRG.2731:MSTRG.5625:MSTRG.2171:MSTRG.22528:MSTRG.19546:MSTRG.7741:MSTRG.22295:MSTRG.19765:MSTRG.3929:MSTRG.6819:MSTRG.11814:MSTRG.10087:MSTRG.20250:MSTRG.13758:MSTRG.18815:MSTRG.21195:SMESG000072873.1:MSTRG.19883:MSTRG.3843:MSTRG.5337:MSTRG.14880:M…	znf596:e22/23:hinfp-1:hinfp-2:rest-1:zfp674:znf-1:znf91:znf333-1:znf652:zscan2-2:zscan2-6:coe:elf1:foxC1:foxC2:foxD1:foxD2:foxD3:foxF1 :foxF2:foxG:foxL1:foxO:pou-p1:foxP:foxN(P):foxQ/D:foxJ1-1:foxJ1-2:foxJ1-3:foxJ1-4:foxJ1-5:foxN2/3-1:foxN2/3-2:foxN2/3-3:foxK1:foxK2:foxK3:gata123:gata456-3:gli-1:gli-2:fezf2:gfi1:zfp541:zfhx3:prdm14:lhx1-3:meis-1:smad1:smad9:mitfl-3:pdp1:neuroD-2:olig:onecut-1:one…	48
272	dd_Smes_g4_11	1257641	1257965	325	*	k27ac_pooled_april21_peak_2504	3.13277	Intron (MSTRG.1646.1/MSTRG.1646, intron 5 of 10)	13	1244577	1260108	15532	2	MSTRG.1646	MSTRG.1646.4	2143	7.39355	0.166614	-0.779806	-1.13385	0	0	0	0.476445	0.270506	CEP43	centrosomal protein 43 [Source:HGNC Symbol;Acc:HGNC:17012]	-	-	0	MSTRG.10887:MSTRG.5414:MSTRG.12684:MSTRG.19544:MSTRG.4288:MSTRG.4289:MSTRG.22163:MSTRG.16827:MSTRG.9571:MSTRG.624:MSTRG.11386:MSTRG.22087:MSTRG.10044:MSTRG.5025:MSTRG.2221:MSTRG.19091:MSTRG.2484:MSTRG.1218:MSTRG.9193:MSTRG.10604:MSTRG.11379:MSTRG.22994:MSTRG.4327:MSTRG.23472:MSTRG.5625:MSTRG.2171:MSTRG.22528:MSTRG.19546:MSTRG.7741:MSTRG.22295:MSTRG.19765:MSTRG.3929:MSTRG.6819:MSTRG.11814:MSTRG.10…	arnt-1:tlx-1:nkx5-3:creb3l-1:hinfp-1:hinfp-2:rest-1:zfp674:znf-1:znf91:znf333-1:znf652:zscan2-2:zscan2-6:dbx:coe:egr*-2:egr4-1:egr4-2:ets-3:ets-5:fli-2:fli-3:fli-1:foxC1:foxC2:foxD1:foxD2:foxD3:foxF1 :foxF2:foxG:foxL1:foxO:pou-p1:foxP:foxQ/D:foxJ1-1:foxJ1-2:foxJ1-3:foxJ1-4:foxJ1-5:foxN2/3-1:foxN2/3-2:foxN2/3-3:foxK1:foxK2:foxK3:gcm-2:gli-1:gli-2:fezf2:gfi1:zfp541:zfhx3:prdm14:hesl-3:hnf4:hesl-2:n…	79
273	dd_Smes_g4_11	1496912	1497126	215	*	k27ac_pooled_april21_peak_2523	3.05676	Intron (MSTRG.1653.1/MSTRG.1653, intron 4 of 11)	13	1502151	1502604	454	1	MSTRG.1654	MSTRG.1654.1	-5025	0.590376	0.222213	-0.298276	-0.571193	0	0	0			SLC45A4	solute carrier family 45 member 4 [Source:HGNC Symbol;Acc:HGNC:29196]	-	-	0	MSTRG.7896:MSTRG.7998:MSTRG.23420:MSTRG.23513:MSTRG.12684:MSTRG.2221:MSTRG.2484:MSTRG.1218:MSTRG.9193:MSTRG.10604:MSTRG.5081:MSTRG.13758:MSTRG.20466:MSTRG.17923:MSTRG.7287:MSTRG.13843:MSTRG.17155:SMESG000049967.1:MSTRG.10215:MSTRG.10177:MSTRG.15979:MSTRG.16327:MSTRG.13692:MSTRG.5965:MSTRG.7427:MSTRG.20979:MSTRG.12930:MSTRG.12309:MSTRG.372:MSTRG.4208:MSTRG.16892:MSTRG.19581:MSTRG.18805:MSTRG.586:M…	znf596:Lox5a:Lox5b:e22/23:nkx5-3:dbx:egr*-2:egr4-1:egr4-2:ets-3:emx1:foxN(P):gli-1:gli-2:nkx6-2:Hox4b:atmin:zscan2-4:cbt:klf-3:klf-1:lmx1-2:lhx1-1:lhx1-4:lhx1-3:lhx3:Mef2-1:gtf2a1:mlx:smad1:smad9:neuroD-1:fer3l-3:pdp1:nr4a-1:nr4a-2:hr51:neuroD-2:olig:pou1:znf181:zbtb24:ski-1:shox:smad4-1:sp5:klf-2:sp6-9:sp8:da:vsx:znf333-2:znf207:zeb-1:znf143:zic-1:zic-2:egr-1:ovo-1:prdm13:gl:znf341:zfp-2:zfp236-…	56
274	dd_Smes_g4_11	1753371	1753756	386	*	k27ac_pooled_april21_peak_2534	3.91712	Intron (SMEST005685004.1/MSTRG.1662, intron 4 of 7)	13	1751575	1819591	68017	1	MSTRG.1662	MSTRG.1662.8	1796	0.23821	0.122476	-0.283197	-0.462171	0	0	0			SLC6A6	solute carrier family 6 member 6 [Source:HGNC Symbol;Acc:HGNC:11052]	-	-	0	MSTRG.7896:MSTRG.9597:MSTRG.6974:MSTRG.7998:MSTRG.23420:MSTRG.23513:MSTRG.10410:MSTRG.12684:MSTRG.4288:MSTRG.4289:MSTRG.22163:MSTRG.16827:MSTRG.9571:MSTRG.624:MSTRG.11386:MSTRG.22087:MSTRG.10044:MSTRG.5025:MSTRG.20458:MSTRG.2221:MSTRG.2484:MSTRG.1218:MSTRG.9193:MSTRG.9479:MSTRG.5625:MSTRG.2171:MSTRG.22528:MSTRG.19546:MSTRG.7741:MSTRG.22295:MSTRG.19765:MSTRG.3929:MSTRG.6819:MSTRG.11814:MSTRG.10087…	znf596:pax3/7-1:alx3-2:Lox5a:Lox5b:e22/23:bsx:nkx5-3:hinfp-1:hinfp-2:rest-1:zfp674:znf-1:znf91:znf333-1:znf652:zscan2-2:zscan2-6:rest-2:dbx:egr*-2:egr4-1:egr4-2:foxA(P):foxC1:foxC2:foxD1:foxD2:foxD3:foxF1 :foxF2:foxG:foxL1:foxO:pou-p1:foxP:foxN(P):foxQ/D:foxJ1-1:foxJ1-2:foxJ1-3:foxJ1-4:foxJ1-5:foxN2/3-1:foxN2/3-2:foxN2/3-3:foxK1:foxK2:foxK3:gata123:gata456-3:gcm-2:nkx6-2:hnf4:Hox1:Hox4a:Hox3a:ner…	82
275	dd_Smes_g4_11	1753967	1754277	311	*	k27ac_pooled_april21_peak_2534	3.91712	Intron (SMEST005685004.1/MSTRG.1662, intron 4 of 7)	13	1751575	1819591	68017	1	MSTRG.1662	MSTRG.1662.8	2392	0.23821	0.122476	-0.283197	-0.462171	0	0	0			SLC6A6	solute carrier family 6 member 6 [Source:HGNC Symbol;Acc:HGNC:11052]	-	-	0	MSTRG.9597:MSTRG.6974:MSTRG.7998:MSTRG.23420:MSTRG.23513:MSTRG.10410:MSTRG.12684:MSTRG.4288:MSTRG.4289:MSTRG.22163:MSTRG.16827:MSTRG.9571:MSTRG.624:MSTRG.11386:MSTRG.22087:MSTRG.10044:MSTRG.5025:MSTRG.20458:MSTRG.2221:MSTRG.2484:MSTRG.1218:MSTRG.9193:MSTRG.9479:MSTRG.5625:MSTRG.2171:MSTRG.22528:MSTRG.19546:MSTRG.7741:MSTRG.22295:MSTRG.19765:MSTRG.3929:MSTRG.6819:MSTRG.11814:MSTRG.10087:MSTRG.2025…	pax3/7-1:alx3-2:Lox5a:Lox5b:e22/23:bsx:nkx5-3:hinfp-1:hinfp-2:rest-1:zfp674:znf-1:znf91:znf333-1:znf652:zscan2-2:zscan2-6:rest-2:dbx:egr*-2:egr4-1:egr4-2:foxA(P):foxC1:foxC2:foxD1:foxD2:foxD3:foxF1 :foxF2:foxG:foxL1:foxO:pou-p1:foxP:foxN(P):foxQ/D:foxJ1-1:foxJ1-2:foxJ1-3:foxJ1-4:foxJ1-5:foxN2/3-1:foxN2/3-2:foxN2/3-3:foxK1:foxK2:foxK3:gata123:gata456-3:gcm-2:nkx6-2:hnf4:Hox1:Hox4a:Hox3a:nerfin2-1:…	88
276	dd_Smes_g4_11	1753701	1753756	56	*	k27ac_pooled_april21_peak_2535	4.59145	Intron (SMEST005685004.1/MSTRG.1662, intron 4 of 7)	13	1751575	1819591	68017	1	MSTRG.1662	MSTRG.1662.8	2126	0.23821	0.122476	-0.277249	-0.414368	0	0	0			SLC6A6	solute carrier family 6 member 6 [Source:HGNC Symbol;Acc:HGNC:11052]	-	-	0	MSTRG.9597:MSTRG.6974:MSTRG.7998:MSTRG.23420:MSTRG.23513:MSTRG.10410:MSTRG.12684:MSTRG.4288:MSTRG.4289:MSTRG.22163:MSTRG.16827:MSTRG.9571:MSTRG.624:MSTRG.11386:MSTRG.22087:MSTRG.10044:MSTRG.5025:MSTRG.20458:MSTRG.2221:MSTRG.2484:MSTRG.1218:MSTRG.9193:MSTRG.9479:MSTRG.5625:MSTRG.2171:MSTRG.22528:MSTRG.19546:MSTRG.7741:MSTRG.22295:MSTRG.19765:MSTRG.3929:MSTRG.6819:MSTRG.11814:MSTRG.10087:MSTRG.2025…	pax3/7-1:alx3-2:Lox5a:Lox5b:e22/23:bsx:nkx5-3:hinfp-1:hinfp-2:rest-1:zfp674:znf-1:znf91:znf333-1:znf652:zscan2-2:zscan2-6:rest-2:dbx:egr*-2:egr4-1:egr4-2:foxA(P):foxC1:foxC2:foxD1:foxD2:foxD3:foxF1 :foxF2:foxG:foxL1:foxO:pou-p1:foxP:foxN(P):foxQ/D:foxJ1-1:foxJ1-2:foxJ1-3:foxJ1-4:foxJ1-5:foxN2/3-1:foxN2/3-2:foxN2/3-3:foxK1:foxK2:foxK3:gata123:gata456-3:gcm-2:nkx6-2:hnf4:Hox1:Hox4a:Hox3a:nerfin2-1:…	90
277	dd_Smes_g4_11	1753967	1754277	311	*	k27ac_pooled_april21_peak_2535	4.59145	Intron (SMEST005685004.1/MSTRG.1662, intron 4 of 7)	13	1751575	1819591	68017	1	MSTRG.1662	MSTRG.1662.8	2392	0.23821	0.122476	-0.277249	-0.414368	0	0	0			SLC6A6	solute carrier family 6 member 6 [Source:HGNC Symbol;Acc:HGNC:11052]	-	-	0	MSTRG.9597:MSTRG.6974:MSTRG.7998:MSTRG.23420:MSTRG.23513:MSTRG.10410:MSTRG.12684:MSTRG.4288:MSTRG.4289:MSTRG.22163:MSTRG.16827:MSTRG.9571:MSTRG.624:MSTRG.11386:MSTRG.22087:MSTRG.10044:MSTRG.5025:MSTRG.20458:MSTRG.2221:MSTRG.2484:MSTRG.1218:MSTRG.9193:MSTRG.9479:MSTRG.5625:MSTRG.2171:MSTRG.22528:MSTRG.19546:MSTRG.7741:MSTRG.22295:MSTRG.19765:MSTRG.3929:MSTRG.6819:MSTRG.11814:MSTRG.10087:MSTRG.2025…	pax3/7-1:alx3-2:Lox5a:Lox5b:e22/23:bsx:nkx5-3:hinfp-1:hinfp-2:rest-1:zfp674:znf-1:znf91:znf333-1:znf652:zscan2-2:zscan2-6:rest-2:dbx:egr*-2:egr4-1:egr4-2:foxA(P):foxC1:foxC2:foxD1:foxD2:foxD3:foxF1 :foxF2:foxG:foxL1:foxO:pou-p1:foxP:foxN(P):foxQ/D:foxJ1-1:foxJ1-2:foxJ1-3:foxJ1-4:foxJ1-5:foxN2/3-1:foxN2/3-2:foxN2/3-3:foxK1:foxK2:foxK3:gata123:gata456-3:gcm-2:nkx6-2:hnf4:Hox1:Hox4a:Hox3a:nerfin2-1:…	88
278	dd_Smes_g4_11	2079360	2079496	137	*	k27ac_pooled_april21_peak_2563	6.25125	Promoter	13	2078915	2079316	402	2	MSTRG.1677	MSTRG.1677.2	-44	1.45601	0.680568	-0.0611591	-0.174789	0	0	0	0.206745	1.21193	PGD	phosphogluconate dehydrogenase [Source:HGNC Symbol;Acc:HGNC:8891]	MSTRG.22528:MSTRG.19546:MSTRG.7741:MSTRG.22295:MSTRG.19765:MSTRG.3929:MSTRG.6819:MSTRG.11814:MSTRG.13758:MSTRG.2271	foxD1:foxD2:foxD3:foxF1 :foxF2:foxG:foxL1:foxO:foxN(P):egr-2	7	MSTRG.9597:MSTRG.6974:MSTRG.7998:MSTRG.23420:SMESG000022963.1:MSTRG.1217:MSTRG.4483:MSTRG.17936:MSTRG.12684:MSTRG.4288:MSTRG.4289:MSTRG.22163:MSTRG.16827:MSTRG.9571:MSTRG.624:MSTRG.11386:MSTRG.22087:MSTRG.10044:MSTRG.5025:MSTRG.20458:MSTRG.14008:MSTRG.2484:MSTRG.1218:MSTRG.9193:MSTRG.10604:MSTRG.5081:MSTRG.11379:MSTRG.22994:MSTRG.4327:MSTRG.19528:MSTRG.2656:MSTRG.2731:MSTRG.23472:MSTRG.5625:MSTRG…	pax3/7-1:alx3-2:Lox5a:Lox5b:barhl1:egr-5:znf362:zf-4:nkx5-3:hinfp-1:hinfp-2:rest-1:zfp674:znf-1:znf91:znf333-1:znf652:zscan2-2:zscan2-6:rest-2:dll-1:egr*-2:egr4-1:egr4-2:ets-3:emx1:ets-5:fli-2:fli-3:ets-1:etv4:elf1:fli-1:foxC1:foxC2:pou-p1:foxP:foxQ/D:foxJ1-1:foxJ1-2:foxJ1-3:foxJ1-4:foxJ1-5:foxN2/3-1:foxN2/3-2:foxN2/3-3:fezf2:gfi1:zfp541:zfhx3:prdm14:nkx6-2:Hox1:Hox4a:nerfin2-1:klf-1:lbx:lhx2-3:l…	75
279	dd_Smes_g4_11	2630135	2630977	843	*	k27ac_pooled_april21_peak_2642	5.54665	Distal Intergenic	13	2614789	2617556	2768	2	MSTRG.1696	SMEST005776001.1	-12579	0.0571645	0.0080014	-0.976722	-1.1389	0	0	0			ADRB2	adrenoceptor beta 2 [Source:HGNC Symbol;Acc:HGNC:286]	-	-	0	MSTRG.10410:MSTRG.1217:MSTRG.4483:MSTRG.17936:MSTRG.2221:MSTRG.10604:MSTRG.11379:MSTRG.22994:MSTRG.4327:MSTRG.19528:MSTRG.2656:MSTRG.2731:MSTRG.23472:MSTRG.23304:MSTRG.8862:MSTRG.5535:MSTRG.17691:MSTRG.16138:MSTRG.4403:MSTRG.12851:MSTRG.17155:SMESG000049967.1:MSTRG.10177:MSTRG.7427:MSTRG.12930:MSTRG.12309:MSTRG.2947:MSTRG.1897:MSTRG.4208:MSTRG.16892:MSTRG.11214:MSTRG.14130:MSTRG.3824:MSTRG.10065:…	bsx:egr-5:znf362:zf-4:dbx:ets-3:ets-5:fli-2:fli-3:ets-1:etv4:elf1:fli-1:fezf2:gfi1:zfp541:zfhx3:prdm14:hnf4:nerfin2-1:atmin:zscan2-4:klf-3:lhx1-3:Mef2-1:gtf2a1:Mef2-2:meis-1:smad1:smad9:myoD:nf-ya1:nf-ya2:otx-1:otx-2:pax6-1:pax6-2:Pbx-4:Prep:pou1:pou4-1:pou4-2:ctcf:zfp-10:zfp677:rx:klf-2:sp6-9:sp8:six4:Tbx-20:Tbx-2/3a:Tbx-2/3c:znf333-2:znf207:znf143:zic-1:zic-2:alx4:prdm1-1:zfp-3:zfp878:zbed1:zsc…	45
280	dd_Smes_g4_11	2777956	2778236	281	*	k27ac_pooled_april21_peak_2643	3.9851	Promoter	13	2777533	2782395	4863	1	MSTRG.1706	MSTRG.1706.7	423	2.36749	0.104199	-0.241585	-0.193298	0	0	0	0.407516	0.43632	SHISAL2B	shisa like 2B [Source:HGNC Symbol;Acc:HGNC:34236]	-	-	0	MSTRG.7896:MSTRG.7998:MSTRG.23420:MSTRG.10410:MSTRG.1217:MSTRG.4483:MSTRG.17936:MSTRG.19544:MSTRG.4288:MSTRG.4289:MSTRG.22163:MSTRG.16827:MSTRG.9571:MSTRG.624:MSTRG.11386:MSTRG.22087:MSTRG.10044:MSTRG.5025:MSTRG.20458:MSTRG.23309:MSTRG.9120:MSTRG.11405:MSTRG.20466:MSTRG.17923:MSTRG.22990:MSTRG.12700:MSTRG.8018:MSTRG.11935:MSTRG.16138:MSTRG.7287:MSTRG.4403:MSTRG.9913:MSTRG.12851:MSTRG.17155:SMESG0…	znf596:Lox5a:Lox5b:bsx:egr-5:znf362:zf-4:creb3l-1:hinfp-1:hinfp-2:rest-1:zfp674:znf-1:znf91:znf333-1:znf652:zscan2-2:zscan2-6:rest-2:gata123:gata456-3:gcm-2:gli-1:gli-2:gli-3:gata456-1:gata456-2:gata456-4:prdm14:nkx6-2:hnf4:Hox3a:nerfin2-1:atmin:zscan2-4:cbt:klf-3:klf-1:lhx1-3:Mef2-1:gtf2a1:sall4:fir1:zfp-8:zfp236-1:zfp354:znf101:znf425:znf660:lmpt-3:smad1:smad9:mitfl-3:nf-ya1:nf-ya2:nkx2l-1:nkx3…	52
281	dd_Smes_g4_11	3410737	3411119	383	*	k27ac_pooled_april21_peak_2651	3.21953	Promoter	13	3374754	3410875	36122	2	MSTRG.1718	MSTRG.1718.1	0	0.550003	0.0220404	-0.902592	-0.471031	0	0	0	0.999323	0.000367278	TLL1	tolloid like 1 [Source:HGNC Symbol;Acc:HGNC:11843]	-	-	0	MSTRG.7896:MSTRG.23513:MSTRG.5414:MSTRG.12684:MSTRG.22126:SMESG000049970.1:SMESG000031904.1:MSTRG.221:MSTRG.2221:MSTRG.14008:MSTRG.22295:MSTRG.19765:MSTRG.19305:MSTRG.17848:MSTRG.9911:MSTRG.10215:MSTRG.1469:MSTRG.12466:MSTRG.7427:MSTRG.12930:MSTRG.12309:MSTRG.6954:MSTRG.8925:MSTRG.4330:MSTRG.14931:MSTRG.12358:MSTRG.19417:MSTRG.432:MSTRG.21315:MSTRG.6529:MSTRG.3802:MSTRG.586:MSTRG.6003:a:MSTRG.261…	znf596:e22/23:tlx-1:nkx5-3:zfp560-1:zscan2-5:zscan2-8:zf-6:dbx:dll-1:foxF1 :foxF2:hesl-2:isl-1:isl-2:cbt:lhx2-3:lmx1-1:lhx1-3:Mef2-1:gtf2a1:msx:sall4:fir1:zfp-8:zfp236-1:zfp354:znf101:znf425:znf660:lmpt-3:pdp1:nkx2l-1:a:nkx3-2:pax2/5/8-1:pax6-1:pax6-2:Xfin:zfp-4:zbed-1:zf-5:pou1:pou4-1:pou4-2:znf181:zbtb24:ski-1:ctcf:zfp-10:zfp677:shox:sp5:six3:six6-2:six6-3:mitfl-2:uncx:rreb1:zfp-6:zf-2:zf-8:znf…	46
282	dd_Smes_g4_11	3651030	3651520	491	*	k27ac_pooled_april21_peak_2665	4.93292	Promoter	13	3640527	3651197	10671	2	MSTRG.1726	SMEST005914001.1	0	1.86071	0.491155	-0.328194	-0.272629	0	0	0	0.708974	-0.35701	CYP2R1	cytochrome P450 family 2 subfamily R member 1 [Source:HGNC Symbol;Acc:HGNC:20580]	-	-	0	MSTRG.7896:MSTRG.7998:MSTRG.23420:MSTRG.10410:SMESG000022963.1:MSTRG.19544:MSTRG.4288:MSTRG.4289:MSTRG.22163:MSTRG.16827:MSTRG.9571:MSTRG.624:MSTRG.11386:MSTRG.22087:MSTRG.10044:MSTRG.5025:MSTRG.20458:MSTRG.2221:MSTRG.19091:MSTRG.10087:MSTRG.20250:MSTRG.16138:MSTRG.3741:MSTRG.7287:MSTRG.12851:MSTRG.17848:MSTRG.9911:MSTRG.1469:MSTRG.13692:MSTRG.5965:MSTRG.7427:MSTRG.12930:MSTRG.12309:MSTRG.372:MST…	znf596:Lox5a:Lox5b:bsx:barhl1:creb3l-1:hinfp-1:hinfp-2:rest-1:zfp674:znf-1:znf91:znf333-1:znf652:zscan2-2:zscan2-6:rest-2:dbx:coe:pou-p1:foxP:prdm14:hesl-3:nkx6-2:nerfin2-1:isl-1:isl-2:lhx2-3:lhx1-1:lhx1-4:lhx1-3:Mef2-1:gtf2a1:mlx:msx:myoD:neuroD-1:fer3l-3:nkx2l-1:nkx3-2:nr-1:nr2e1:tlx-2:hr51:neuroD-2:olig:Pbx-4:Prep:pou4-1:pou4-2:ctcf:zfp-10:zfp677:rx:scratch-like:shox:srebp:six4:tal:ptf-4:ap4-1…	52
283	dd_Smes_g4_11	3651030	3651562	533	*	k27ac_pooled_april21_peak_2666	3.05676	Promoter	13	3640527	3651197	10671	2	MSTRG.1726	SMEST005914001.1	0	1.86071	0.491155	-0.328194	-0.272629	0	0	0	0.708974	-0.35701	CYP2R1	cytochrome P450 family 2 subfamily R member 1 [Source:HGNC Symbol;Acc:HGNC:20580]	-	-	0	MSTRG.7896:MSTRG.7998:MSTRG.23420:MSTRG.10410:SMESG000022963.1:MSTRG.19544:MSTRG.4288:MSTRG.4289:MSTRG.22163:MSTRG.16827:MSTRG.9571:MSTRG.624:MSTRG.11386:MSTRG.22087:MSTRG.10044:MSTRG.5025:MSTRG.20458:MSTRG.2221:MSTRG.19091:MSTRG.10087:MSTRG.20250:MSTRG.16138:MSTRG.3741:MSTRG.7287:MSTRG.12851:MSTRG.17848:MSTRG.9911:MSTRG.1469:MSTRG.13692:MSTRG.5965:MSTRG.7427:MSTRG.12930:MSTRG.12309:MSTRG.372:MST…	znf596:Lox5a:Lox5b:bsx:barhl1:creb3l-1:hinfp-1:hinfp-2:rest-1:zfp674:znf-1:znf91:znf333-1:znf652:zscan2-2:zscan2-6:rest-2:dbx:coe:pou-p1:foxP:prdm14:hesl-3:nkx6-2:nerfin2-1:isl-1:isl-2:lhx2-3:lhx1-1:lhx1-4:lhx1-3:Mef2-1:gtf2a1:mlx:msx:myoD:neuroD-1:fer3l-3:nkx2l-1:nkx3-2:nr-1:nr2e1:tlx-2:hr51:neuroD-2:olig:Pbx-4:Prep:pou4-1:pou4-2:ctcf:zfp-10:zfp677:rx:scratch-like:shox:srebp:six4:tal:ptf-4:ap4-1…	52
284	dd_Smes_g4_11	3887996	3888082	87	*	k27ac_pooled_april21_peak_2679	7.28206	Intron (SMEST005937001.1/MSTRG.1732, intron 11 of 11)	13	3900350	3917602	17253	2	MSTRG.1733	SMEST005938001.1	29520	1.26689	0.302614	-0.163478	0.0893588	0	0	0	0.947691	-0.0493475	SNX33	sorting nexin 33 [Source:HGNC Symbol;Acc:HGNC:28468]	MSTRG.21923:MSTRG.9638:MSTRG.7792:MSTRG.6856:MSTRG.10592:MSTRG.12851:MSTRG.7427:MSTRG.8925:MSTRG.4330:MSTRG.14931:MSTRG.12358:MSTRG.19417:MSTRG.432:MSTRG.21315:MSTRG.6529:MSTRG.3802:MSTRG.22605:MSTRG.23589	barhl2-1:barhl2-2:nkx3-1:nkx5-2:nkx5-1:nerfin2-1:lhx1-3:sall4:fir1:zfp-8:zfp236-1:zfp354:znf101:znf425:znf660:lmpt-3:mitfl-2:alx4	8	MSTRG.10887:MSTRG.7896:MSTRG.7998:MSTRG.23420:MSTRG.23513:MSTRG.10410:SMESG000022963.1:MSTRG.5414:MSTRG.12684:MSTRG.22126:SMESG000049970.1:SMESG000031904.1:MSTRG.221:MSTRG.14008:MSTRG.2484:MSTRG.1218:MSTRG.9193:MSTRG.5081:MSTRG.22295:MSTRG.19765:MSTRG.23309:MSTRG.9120:MSTRG.20466:MSTRG.17923:MSTRG.23304:MSTRG.8862:MSTRG.5535:MSTRG.17691:MSTRG.3741:MSTRG.7287:MSTRG.19305:MSTRG.17848:MSTRG.9911:MST…	arnt-1:znf596:Lox5a:Lox5b:e22/23:bsx:barhl1:tlx-1:nkx5-3:zfp560-1:zscan2-5:zscan2-8:zf-6:dll-1:egr*-2:egr4-1:egr4-2:emx1:foxF1 :foxF2:gata123:gata456-3:gli-1:gli-2:fezf2:gfi1:zfp541:zfhx3:hesl-3:nkx6-2:hesl-2:isl-1:isl-2:atmin:zscan2-4:klf-3:klf-1:lhx2-1:lhx2-4:lhx2-3:lhx1-1:lhx1-4:meis-1:mlx:musculin:msx:smad1:smad9:mitfl-3:neuroD-1:fer3l-3:nf-ya1:nf-ya2:nkx2l-1:nkx3-2:nkx6-1:hr51:neuroD-2:olig:…	72
285	dd_Smes_g4_11	3917974	3918380	407	*	k27ac_pooled_april21_peak_2681	1.78959	Promoter	13	3900350	3917602	17253	2	MSTRG.1733	SMEST005938001.1	-372	1.26689	0.302614	-0.38356	0.322542	0	0	0	0.947691	-0.0493475	SNX33	sorting nexin 33 [Source:HGNC Symbol;Acc:HGNC:28468]	-	-	0	MSTRG.7998:MSTRG.23420:MSTRG.1217:MSTRG.4483:MSTRG.17936:MSTRG.4288:MSTRG.4289:MSTRG.22163:MSTRG.16827:MSTRG.9571:MSTRG.624:MSTRG.11386:MSTRG.22087:MSTRG.10044:MSTRG.5025:MSTRG.20458:MSTRG.22126:SMESG000049970.1:SMESG000031904.1:MSTRG.221:MSTRG.2221:MSTRG.14008:MSTRG.2484:MSTRG.1218:MSTRG.9193:MSTRG.10604:MSTRG.9479:MSTRG.5625:MSTRG.2171:MSTRG.10087:MSTRG.20250:MSTRG.13758:MSTRG.18815:MSTRG.21195…	Lox5a:Lox5b:egr-5:znf362:zf-4:hinfp-1:hinfp-2:rest-1:zfp674:znf-1:znf91:znf333-1:znf652:zscan2-2:zscan2-6:rest-2:zfp560-1:zscan2-5:zscan2-8:zf-6:dbx:dll-1:egr*-2:egr4-1:egr4-2:ets-3:foxA(P):foxC1:foxC2:pou-p1:foxP:foxN(P):foxQ/D:foxJ1-1:foxJ1-2:foxJ1-3:foxJ1-4:foxJ1-5:foxN2/3-1:foxN2/3-2:foxN2/3-3:foxK1:foxK2:foxK3:gcm-2:gli-1:gli-2:fezf2:gfi1:zfp541:zfhx3:prdm14:nkx6-2:atmin:zscan2-4:lhx1-3:sall…	63
286	dd_Smes_g4_11	3991599	3991921	323	*	k27ac_pooled_april21_peak_2690	4.40562	Promoter	13	3947361	3990832	43472	2	MSTRG.1735	MSTRG.1735.9	-767	2.02865	0.116334	-0.309921	-0.10593	0	0	0	0.846279	-0.104163	RBMS1	RNA binding motif single stranded interacting protein 1 [Source:HGNC Symbol;Acc:HGNC:9907]	-	-	0	MSTRG.10887:MSTRG.9597:MSTRG.6974:MSTRG.7998:MSTRG.23420:MSTRG.10410:MSTRG.1217:MSTRG.4483:MSTRG.17936:MSTRG.5414:MSTRG.12684:MSTRG.4288:MSTRG.4289:MSTRG.22163:MSTRG.16827:MSTRG.9571:MSTRG.624:MSTRG.11386:MSTRG.22087:MSTRG.10044:MSTRG.5025:MSTRG.20458:MSTRG.22126:SMESG000049970.1:SMESG000031904.1:MSTRG.221:MSTRG.2221:MSTRG.19091:MSTRG.11379:MSTRG.22994:MSTRG.4327:MSTRG.23472:MSTRG.20466:MSTRG.179…	arnt-1:pax3/7-1:alx3-2:Lox5a:Lox5b:bsx:egr-5:znf362:zf-4:tlx-1:nkx5-3:hinfp-1:hinfp-2:rest-1:zfp674:znf-1:znf91:znf333-1:znf652:zscan2-2:zscan2-6:rest-2:zfp560-1:zscan2-5:zscan2-8:zf-6:dbx:coe:ets-5:fli-2:fli-3:fli-1:gli-1:gli-2:hesl-3:nkx6-2:hnf4:hesl-2:nerfin2-1:isl-1:isl-2:atmin:zscan2-4:cbt:klf-3:klf-1:egr-2:lbx:lhx2-3:lhx1-1:lhx1-4:lhx1-3:lhx3:mlx:msx:sall4:fir1:zfp-8:zfp236-1:zfp354:znf101:…	73
287	dd_Smes_g4_11	3993170	3993645	476	*	k27ac_pooled_april21_peak_2691	5.11999	Distal Intergenic	13	3947361	3990832	43472	2	MSTRG.1735	MSTRG.1735.9	-2338	2.02865	0.116334	-0.412387	0.26957	0	0	0	0.846279	-0.104163	RBMS1	RNA binding motif single stranded interacting protein 1 [Source:HGNC Symbol;Acc:HGNC:9907]	-	-	0	MSTRG.10887:MSTRG.7896:MSTRG.9597:MSTRG.7998:MSTRG.23420:MSTRG.1217:MSTRG.4483:MSTRG.17936:MSTRG.20458:MSTRG.2221:MSTRG.19091:MSTRG.11379:MSTRG.22994:MSTRG.4327:MSTRG.23472:MSTRG.18451:MSTRG.12975:MSTRG.17474:MSTRG.20466:MSTRG.17923:MSTRG.23304:MSTRG.8862:MSTRG.5535:MSTRG.17691:MSTRG.16138:MSTRG.3741:MSTRG.7287:MSTRG.19305:MSTRG.23578:MSTRG.20904:MSTRG.9913:MSTRG.12851:MSTRG.17155:SMESG000049967.…	arnt-1:znf596:pax3/7-1:Lox5a:Lox5b:egr-5:znf362:zf-4:rest-2:dbx:coe:ets-5:fli-2:fli-3:fli-1:foxK1:foxK2:foxK3:gli-1:gli-2:fezf2:gfi1:zfp541:zfhx3:prdm14:hesl-3:nkx6-2:hesl-2:Hox1:Hox4a:Hox3a:nerfin2-1:atmin:zscan2-4:cbt:klf-3:klf-1:lbx:lhx2-1:lhx2-4:lhx1-3:lhx3:meis-1:mlx:sall4:fir1:zfp-8:zfp236-1:zfp354:znf101:znf425:znf660:lmpt-3:smad1:smad9:mitfl-3:myoD:nf-ya1:nf-ya2:nkx6-1:nr2f1:nr4a-1:nr4a-2…	76
288	dd_Smes_g4_11	4281023	4281545	523	*	k27ac_pooled_april21_peak_2711	6.84727	Promoter	13	4281645	4286901	5257	1	MSTRG.1744	SMEST005970001.1	-100	5.19055	0.358917	-0.170614	0.0421419	0	0	0	0.643638	0.198221	-	-	-	-	0	MSTRG.10887:MSTRG.7896:MSTRG.7998:MSTRG.23420:MSTRG.10410:SMESG000022963.1:MSTRG.12684:MSTRG.14008:MSTRG.19091:MSTRG.2484:MSTRG.1218:MSTRG.9193:MSTRG.10604:MSTRG.5081:MSTRG.10087:MSTRG.20250:MSTRG.23309:MSTRG.9120:MSTRG.20466:MSTRG.17923:MSTRG.22990:MSTRG.12700:MSTRG.8018:MSTRG.11935:MSTRG.16138:MSTRG.7287:MSTRG.13843:MSTRG.10592:MSTRG.23578:MSTRG.20904:MSTRG.9913:MSTRG.12851:MSTRG.17848:MSTRG.99…	arnt-1:znf596:Lox5a:Lox5b:bsx:barhl1:nkx5-3:dll-1:coe:egr*-2:egr4-1:egr4-2:ets-3:emx1:pou-p1:foxP:gata123:gata456-3:gli-1:gli-2:gli-3:gata456-1:gata456-2:gata456-4:prdm14:nkx6-2:Hox4b:nkx5-1:Hox1:Hox4a:Hox3a:nerfin2-1:isl-1:isl-2:egr-2:lhx2-1:lhx2-4:lhx1-3:lhx3:Mef2-1:gtf2a1:Mef2-2:meis-1:meox:musculin:sall4:fir1:zfp-8:zfp236-1:zfp354:znf101:znf425:znf660:lmpt-3:myoD:nf-ya1:nf-ya2:nkx3-2:nkx6-1:n…	82
289	dd_Smes_g4_11	4282363	4282585	223	*	k27ac_pooled_april21_peak_2712	6.24513	Promoter	13	4281915	4286901	4987	1	MSTRG.1744	MSTRG.1744.4	448	5.19055	0.358917	0.0331343	-0.0542683	0	0	0	0.643638	0.198221	-	-	-	-	0	MSTRG.7896:MSTRG.7998:MSTRG.23420:MSTRG.1217:MSTRG.4483:MSTRG.17936:MSTRG.12684:MSTRG.20458:MSTRG.22126:SMESG000049970.1:SMESG000031904.1:MSTRG.221:MSTRG.2484:MSTRG.1218:MSTRG.9193:MSTRG.11379:MSTRG.22994:MSTRG.4327:MSTRG.19528:MSTRG.2656:MSTRG.23472:MSTRG.22528:MSTRG.19546:MSTRG.7741:MSTRG.22295:MSTRG.19765:MSTRG.3929:MSTRG.6819:MSTRG.11814:MSTRG.10087:MSTRG.20250:MSTRG.13758:MSTRG.18451:MSTRG.1…	znf596:Lox5a:Lox5b:egr-5:znf362:zf-4:nkx5-3:rest-2:zfp560-1:zscan2-5:zscan2-8:zf-6:egr*-2:egr4-1:egr4-2:ets-5:fli-2:fli-3:ets-1:etv4:fli-1:foxD1:foxD2:foxD3:foxF1 :foxF2:foxG:foxL1:foxO:pou-p1:foxP:foxN(P):foxK1:foxK2:foxK3:gli-1:gli-2:nkx6-2:hesl-2:nkx3-1:nkx5-2:nkx5-1:isl-1:isl-2:cbt:klf-1:lhx1-3:lhx3:Mef2-1:gtf2a1:Mef2-2:meis-1:musculin:myoD:nf-ya1:nf-ya2:nkx6-1:hr51:onecut-1:onecut-2:onecut-3…	65
290	dd_Smes_g4_11	4312537	4313061	525	*	k27ac_pooled_april21_peak_2716	8.82087	Intron (MSTRG.1743.2/MSTRG.1743, intron 1 of 7)	13	4264369	4321492	57124	2	MSTRG.1743	MSTRG.1743.3	8431	78.7002	0.33487	-0.349086	-0.522151	0	0	0	0.98291	0.0231371	DDX17	DEAD-box helicase 17 [Source:HGNC Symbol;Acc:HGNC:2740]	MSTRG.15832	pou1	1	MSTRG.7896:MSTRG.7998:MSTRG.23420:MSTRG.21923:MSTRG.9638:SMESG000022963.1:MSTRG.12684:MSTRG.4288:MSTRG.4289:MSTRG.22163:MSTRG.16827:MSTRG.9571:MSTRG.624:MSTRG.11386:MSTRG.22087:MSTRG.10044:MSTRG.5025:MSTRG.2221:MSTRG.14008:MSTRG.19091:MSTRG.5081:MSTRG.11379:MSTRG.22994:MSTRG.4327:MSTRG.19528:MSTRG.2656:MSTRG.23472:MSTRG.9479:MSTRG.5625:MSTRG.2171:MSTRG.22528:MSTRG.19546:MSTRG.7741:MSTRG.3929:MSTR…	znf596:Lox5a:Lox5b:barhl2-1:barhl2-2:barhl1:nkx5-3:hinfp-1:hinfp-2:rest-1:zfp674:znf-1:znf91:znf333-1:znf652:zscan2-2:zscan2-6:dbx:dll-1:coe:emx1:ets-5:fli-2:fli-3:ets-1:etv4:fli-1:foxA(P):foxC1:foxC2:foxD1:foxD2:foxD3:foxG:foxL1:foxO:pou-p1:foxP:foxN(P):foxQ/D:foxJ1-1:foxJ1-2:foxJ1-3:foxJ1-4:foxJ1-5:foxN2/3-1:foxN2/3-2:foxN2/3-3:foxK1:foxK2:foxK3:gli-1:gli-2:gli-3:prdm14:nkx6-2:hnf4:hesl-2:klf-1…	75
291	dd_Smes_g4_11	4321427	4321542	116	*	k27ac_pooled_april21_peak_2719	12.3425	Promoter	13	4264369	4321492	57124	2	MSTRG.1743	MSTRG.1743.3	0	78.7002	0.33487	-0.566771	-0.353281	0	0	0	0.98291	0.0231371	DDX17	DEAD-box helicase 17 [Source:HGNC Symbol;Acc:HGNC:2740]	-	-	0	MSTRG.9597:MSTRG.6974:MSTRG.7998:MSTRG.23420:MSTRG.21923:MSTRG.9638:MSTRG.1217:MSTRG.4483:MSTRG.17936:MSTRG.12684:MSTRG.4288:MSTRG.4289:MSTRG.22163:MSTRG.16827:MSTRG.9571:MSTRG.624:MSTRG.11386:MSTRG.22087:MSTRG.10044:MSTRG.5025:MSTRG.20458:MSTRG.2221:MSTRG.5081:MSTRG.9479:MSTRG.22528:MSTRG.19546:MSTRG.7741:MSTRG.22295:MSTRG.19765:MSTRG.3929:MSTRG.6819:MSTRG.11814:MSTRG.13758:MSTRG.20466:MSTRG.179…	pax3/7-1:alx3-2:Lox5a:Lox5b:barhl2-1:barhl2-2:egr-5:znf362:zf-4:nkx5-3:hinfp-1:hinfp-2:rest-1:zfp674:znf-1:znf91:znf333-1:znf652:zscan2-2:zscan2-6:rest-2:dbx:emx1:foxA(P):foxD1:foxD2:foxD3:foxF1 :foxF2:foxG:foxL1:foxO:foxN(P):gli-1:gli-2:fezf2:gfi1:zfp541:zfhx3:prdm14:nkx6-2:hnf4:hesl-2:nerfin2-1:klf-3:lbx:lhx1-3:lhx3:meox:nf-ya1:nf-ya2:nkx3-2:hr51:Xfin:zfp-4:zbed-1:zf-5:a:znf181:zbtb24:ski-1:ctc…	61
292	dd_Smes_g4_11	4326135	4326209	75	*	k27ac_pooled_april21_peak_2720	3.32302	Distal Intergenic	13	4317027	4321573	4547	2	MSTRG.1743	SMEST005975001.1	-4562	78.7002	0.33487	-0.833263	-0.50118	0	0	0	0.98291	0.0231371	DDX17	DEAD-box helicase 17 [Source:HGNC Symbol;Acc:HGNC:2740]	-	-	0	MSTRG.10887:MSTRG.7896:MSTRG.1217:MSTRG.4483:MSTRG.17936:MSTRG.12684:MSTRG.20458:MSTRG.2221:MSTRG.22528:MSTRG.19546:MSTRG.7741:MSTRG.3929:MSTRG.6819:MSTRG.11814:MSTRG.13758:MSTRG.18451:MSTRG.12975:MSTRG.17474:MSTRG.3741:MSTRG.19305:MSTRG.12851:MSTRG.10215:MSTRG.7427:MSTRG.20979:MSTRG.1897:MSTRG.8925:MSTRG.4330:MSTRG.14931:MSTRG.12358:MSTRG.19417:MSTRG.432:MSTRG.21315:MSTRG.6529:MSTRG.3802:MSTRG.4…	arnt-1:znf596:egr-5:znf362:zf-4:nkx5-3:rest-2:dbx:foxD1:foxD2:foxD3:foxG:foxL1:foxO:foxN(P):foxK1:foxK2:foxK3:hesl-3:hesl-2:nerfin2-1:cbt:lhx1-3:lhx3:meis-1:sall4:fir1:zfp-8:zfp236-1:zfp354:znf101:znf425:znf660:lmpt-3:smad1:smad9:mitfl-3:myoD:nr2f1:onecut-1:onecut-2:onecut-3:onecut-5:hnf6:cux-2:pax2/5/8-1:phox:Pbx-4:Prep:Xfin:zfp-4:zbed-1:zf-5:a:zfp-7:kdm5b:ctcf:zfp-10:zfp677:scratch-like:smad4-1…	56
293	dd_Smes_g4_11	4326135	4326741	607	*	k27ac_pooled_april21_peak_2721	8.82394	Distal Intergenic	13	4317027	4321573	4547	2	MSTRG.1743	SMEST005975001.1	-4562	78.7002	0.33487	-0.833263	-0.50118	0	0	0	0.98291	0.0231371	DDX17	DEAD-box helicase 17 [Source:HGNC Symbol;Acc:HGNC:2740]	-	-	0	MSTRG.10887:MSTRG.7896:MSTRG.1217:MSTRG.4483:MSTRG.17936:MSTRG.12684:MSTRG.20458:MSTRG.2221:MSTRG.22528:MSTRG.19546:MSTRG.7741:MSTRG.3929:MSTRG.6819:MSTRG.11814:MSTRG.13758:MSTRG.18451:MSTRG.12975:MSTRG.17474:MSTRG.3741:MSTRG.19305:MSTRG.12851:MSTRG.10215:MSTRG.7427:MSTRG.20979:MSTRG.1897:MSTRG.8925:MSTRG.4330:MSTRG.14931:MSTRG.12358:MSTRG.19417:MSTRG.432:MSTRG.21315:MSTRG.6529:MSTRG.3802:MSTRG.4…	arnt-1:znf596:egr-5:znf362:zf-4:nkx5-3:rest-2:dbx:foxD1:foxD2:foxD3:foxG:foxL1:foxO:foxN(P):foxK1:foxK2:foxK3:hesl-3:hesl-2:nerfin2-1:cbt:lhx1-3:lhx3:meis-1:sall4:fir1:zfp-8:zfp236-1:zfp354:znf101:znf425:znf660:lmpt-3:smad1:smad9:mitfl-3:myoD:nr2f1:onecut-1:onecut-2:onecut-3:onecut-5:hnf6:cux-2:pax2/5/8-1:phox:Pbx-4:Prep:Xfin:zfp-4:zbed-1:zf-5:a:zfp-7:kdm5b:ctcf:zfp-10:zfp677:scratch-like:smad4-1…	56
294	dd_Smes_g4_11	4333791	4334041	251	*	k27ac_pooled_april21_peak_2725	6.84725	Distal Intergenic	13	4343659	4345457	1799	2	SMESG000005977.1	SMEST005977001.1	11416	0.104527	0.332193	-0.524173	-0.615795	0	0	0			ZNF862	zinc finger protein 862 [Source:HGNC Symbol;Acc:HGNC:34519]	-	-	0	MSTRG.7896:MSTRG.7998:MSTRG.23420:MSTRG.1217:MSTRG.4483:MSTRG.17936:MSTRG.12684:MSTRG.4288:MSTRG.4289:MSTRG.22163:MSTRG.16827:MSTRG.9571:MSTRG.624:MSTRG.11386:MSTRG.22087:MSTRG.10044:MSTRG.5025:MSTRG.20458:MSTRG.2484:MSTRG.1218:MSTRG.9193:MSTRG.10604:MSTRG.2731:MSTRG.22528:MSTRG.19546:MSTRG.7741:MSTRG.3929:MSTRG.6819:MSTRG.11814:MSTRG.10087:MSTRG.20250:MSTRG.13758:MSTRG.18815:MSTRG.21195:SMESG000…	znf596:Lox5a:Lox5b:egr-5:znf362:zf-4:nkx5-3:hinfp-1:hinfp-2:rest-1:zfp674:znf-1:znf91:znf333-1:znf652:zscan2-2:zscan2-6:rest-2:egr*-2:egr4-1:egr4-2:ets-3:elf1:foxD1:foxD2:foxD3:foxG:foxL1:foxO:pou-p1:foxP:foxN(P):foxQ/D:foxJ1-1:foxJ1-2:foxJ1-3:foxJ1-4:foxJ1-5:foxN2/3-1:foxN2/3-2:foxN2/3-3:gcm-2:gli-1:gli-2:gli-3:fezf2:gfi1:zfp541:zfhx3:hesl-3:nkx6-2:Hox4b:hesl-2:Hox1:Hox4a:nerfin2-1:isl-1:isl-2:a…	86
295	dd_Smes_g4_11	4357259	4357743	485	*	k27ac_pooled_april21_peak_2728	3.00798	Distal Intergenic	13	4359666	4364039	4374	2	MSTRG.1745	MSTRG.1745.1	6296	0.590076	0.0537405	-0.303484	0.00839288	0	0	0	0.174105	1.26794	RHAG	Rh associated glycoprotein [Source:HGNC Symbol;Acc:HGNC:10006]	-	-	0	MSTRG.10410:MSTRG.1217:MSTRG.4483:MSTRG.17936:MSTRG.5414:MSTRG.12684:MSTRG.2221:MSTRG.18815:MSTRG.21195:SMESG000072873.1:MSTRG.19883:MSTRG.3843:MSTRG.5337:MSTRG.14880:MSTRG.5693:MSTRG.10837:MSTRG.18451:MSTRG.12975:MSTRG.17474:MSTRG.23304:MSTRG.8862:MSTRG.5535:MSTRG.17691:MSTRG.16138:MSTRG.13843:MSTRG.19305:MSTRG.10592:MSTRG.10215:MSTRG.10177:MSTRG.15979:MSTRG.1469:MSTRG.12466:MSTRG.6445:MSTRG.695…	bsx:egr-5:znf362:zf-4:tlx-1:nkx5-3:dbx:foxQ/D:foxJ1-1:foxJ1-2:foxJ1-3:foxJ1-4:foxJ1-5:foxN2/3-1:foxN2/3-2:foxN2/3-3:foxK1:foxK2:foxK3:fezf2:gfi1:zfp541:zfhx3:prdm14:Hox4b:hesl-2:nkx5-1:cbt:klf-3:klf-1:lhx2-3:lmx1-1:musculin:msx:nf-ya1:nf-ya2:nkx2l-1:a:nr-1:nr2e1:tlx-2:pax2/5/8-1:pax6-1:pax6-2:phox:Pbx-4:Prep:Xfin:zfp-4:zbed-1:zf-5:pou4-1:pou4-2:ctcf:zfp-10:zfp677:shox:smad4-1:klf-2:sp6-9:sp8:six4…	47
296	dd_Smes_g4_11	4694612	4694834	223	*	k27ac_pooled_april21_peak_2747	4.22618	Intron (MSTRG.1762.2/MSTRG.1762, intron 2 of 2)	13	4691234	4693233	2000	2	MSTRG.1762	SMEST006014001.1	-1379	0.179554	0.00787513	-0.427452	-0.211712	0	0	0			PKM	pyruvate kinase M1/2 [Source:HGNC Symbol;Acc:HGNC:9021]	-	-	0	MSTRG.7998:MSTRG.23420:SMESG000022963.1:MSTRG.1217:MSTRG.4483:MSTRG.17936:MSTRG.20458:MSTRG.14008:MSTRG.2484:MSTRG.1218:MSTRG.9193:MSTRG.10604:MSTRG.11379:MSTRG.22994:MSTRG.4327:MSTRG.19528:MSTRG.2656:MSTRG.2731:MSTRG.23472:MSTRG.23309:MSTRG.9120:MSTRG.20466:MSTRG.17923:MSTRG.22990:MSTRG.23304:MSTRG.8862:MSTRG.5535:MSTRG.17691:MSTRG.7287:MSTRG.13843:MSTRG.9913:MSTRG.17848:MSTRG.9911:MSTRG.10215:M…	Lox5a:Lox5b:barhl1:egr-5:znf362:zf-4:rest-2:dll-1:egr*-2:egr4-1:egr4-2:ets-3:ets-5:fli-2:fli-3:ets-1:etv4:elf1:fli-1:gata123:gata456-3:gli-1:gli-2:gli-3:fezf2:gfi1:zfp541:zfhx3:nkx6-2:Hox4b:Hox3a:isl-1:isl-2:cbt:klf-1:lhx1-3:lhx3:Mef2-1:gtf2a1:Mef2-2:meis-1:sall4:fir1:zfp-8:zfp236-1:zfp354:znf101:znf425:znf660:lmpt-3:smad1:smad9:myoD:nkx2l-1:nkx3-2:nr-1:nr2e1:tlx-2:hr51:onecut-1:onecut-2:onecut-3…	65
297	dd_Smes_g4_11	4896990	4897301	312	*	k27ac_pooled_april21_peak_2758	8.13343	Promoter	13	4897684	4899922	2239	1	MSTRG.1771	MSTRG.1771.1	-383	15.8629	0.344173	0.576923	0.0688497	0	0	0	0.198541	0.566071	H2AC20	H2A clustered histone 20 [Source:HGNC Symbol;Acc:HGNC:4738]	MSTRG.7896:MSTRG.10604:MSTRG.11379:MSTRG.22994:MSTRG.4327:MSTRG.19528:MSTRG.2656:MSTRG.2731:MSTRG.23472	znf596:ets-3:ets-5:fli-2:fli-3:ets-1:etv4:elf1:fli-1	7	MSTRG.10887:MSTRG.12684:MSTRG.20458:MSTRG.19091:MSTRG.2484:MSTRG.1218:MSTRG.9193:MSTRG.9479:MSTRG.23309:MSTRG.9120:MSTRG.11405:MSTRG.20466:MSTRG.17923:MSTRG.22990:MSTRG.19305:MSTRG.7792:MSTRG.6856:MSTRG.10592:MSTRG.10177:MSTRG.15979:MSTRG.1469:MSTRG.12466:MSTRG.7427:MSTRG.6445:MSTRG.6954:MSTRG.8925:MSTRG.4330:MSTRG.14931:MSTRG.12358:MSTRG.19417:MSTRG.432:MSTRG.21315:MSTRG.6529:MSTRG.3802:MSTRG.11…	arnt-1:nkx5-3:rest-2:coe:egr*-2:egr4-1:egr4-2:foxA(P):gata123:gata456-3:gcm-2:gli-1:gli-2:gli-3:hesl-2:nkx3-1:nkx5-2:nkx5-1:klf-3:klf-1:lhx2-3:lmx1-1:lhx1-3:musculin:msx:sall4:fir1:zfp-8:zfp236-1:zfp354:znf101:znf425:znf660:lmpt-3:myoD:nf-ya1:nf-ya2:nr4a-1:nr4a-2:pax6-1:pax6-2:pitx:Xfin:zfp-4:zbed-1:zf-5:pou1:a:znf181:zbtb24:ski-1:rfx7:ctcf:zfp-10:zfp677:shox:smad4-1:snail-1:snail-2:six3:six6-2:s…	56
298	dd_Smes_g4_11	5163803	5163863	61	*	k27ac_pooled_april21_peak_2773	3.18912	Promoter	13	5162995	5163639	645	1	MSTRG.1784	MSTRG.1784.3	808	108.759	0.458503	-0.130652	-0.0663791	0	0	0	0.607618	0.165845	MRPL36	mitochondrial ribosomal protein L36 [Source:HGNC Symbol;Acc:HGNC:14490]	-	-	0	MSTRG.10887:MSTRG.7998:MSTRG.23420:MSTRG.1217:MSTRG.4483:MSTRG.17936:MSTRG.12684:MSTRG.19544:MSTRG.4288:MSTRG.4289:MSTRG.22163:MSTRG.16827:MSTRG.9571:MSTRG.624:MSTRG.11386:MSTRG.22087:MSTRG.10044:MSTRG.5025:MSTRG.20458:MSTRG.2221:MSTRG.19091:MSTRG.2484:MSTRG.1218:MSTRG.9193:MSTRG.18451:MSTRG.12975:MSTRG.17474:MSTRG.23309:MSTRG.9120:MSTRG.20466:MSTRG.17923:MSTRG.22990:MSTRG.16138:MSTRG.7287:MSTRG.…	arnt-1:Lox5a:Lox5b:egr-5:znf362:zf-4:nkx5-3:creb3l-1:hinfp-1:hinfp-2:rest-1:zfp674:znf-1:znf91:znf333-1:znf652:zscan2-2:zscan2-6:rest-2:dbx:coe:egr*-2:egr4-1:egr4-2:foxK1:foxK2:foxK3:gata123:gata456-3:gli-1:gli-2:gli-3:prdm14:nkx6-2:Hox4b:hesl-2:nerfin2-1:atmin:zscan2-4:cbt:klf-3:klf-1:egr-2:lmx1-1:lhx1-3:lhx3:meis-1:mlx:sall4:fir1:zfp-8:zfp236-1:zfp354:znf101:znf425:znf660:lmpt-3:smad1:smad9:nkx…	70
299	dd_Smes_g4_11	5493946	5494684	739	*	k27ac_pooled_april21_peak_2804	2.36525	Intron (MSTRG.1796.1/MSTRG.1796, intron 2 of 7)	13	5490999	5515533	24535	1	MSTRG.1796	MSTRG.1796.5	2947	6.52798	0.197182	-0.377064	-0.24671	1	1	1	0.0347131	-0.518076	ZBED1	zinc finger BED-type containing 1 [Source:HGNC Symbol;Acc:HGNC:447]	-	-	0	MSTRG.10887:MSTRG.5414:MSTRG.12684:MSTRG.4288:MSTRG.4289:MSTRG.22163:MSTRG.16827:MSTRG.9571:MSTRG.624:MSTRG.11386:MSTRG.22087:MSTRG.10044:MSTRG.5025:MSTRG.20458:MSTRG.22126:SMESG000049970.1:SMESG000031904.1:MSTRG.221:MSTRG.2221:MSTRG.10604:MSTRG.11379:MSTRG.22994:MSTRG.4327:MSTRG.19528:MSTRG.2656:MSTRG.2731:MSTRG.23472:MSTRG.13843:MSTRG.10592:MSTRG.17848:MSTRG.9911:MSTRG.10215:MSTRG.15979:MSTRG.8…	arnt-1:tlx-1:nkx5-3:hinfp-1:hinfp-2:rest-1:zfp674:znf-1:znf91:znf333-1:znf652:zscan2-2:zscan2-6:rest-2:zfp560-1:zscan2-5:zscan2-8:zf-6:dbx:ets-3:ets-5:fli-2:fli-3:ets-1:etv4:elf1:fli-1:Hox4b:nkx5-1:isl-1:isl-2:cbt:klf-1:sall4:fir1:zfp-8:zfp236-1:zfp354:znf101:znf425:znf660:lmpt-3:smad1:smad9:myoD:nr2f1:nr-1:nr2e1:tlx-2:onecut-1:onecut-2:onecut-3:onecut-5:hnf6:cux-2:pax6-1:pax6-2:pitx:a:znf181:zbt…	46
300	dd_Smes_g4_11	5690639	5691186	548	*	k27ac_pooled_april21_peak_2820	3.70272	Intron (SMEST006149001.1/MSTRG.1803, intron 1 of 2)	13	5689501	5698177	8677	1	MSTRG.1803	SMEST006149001.1	1138	0.0885534	0.0223488	-0.701541	-1.24113	0	0	0			ATXN1	ataxin 1 [Source:HGNC Symbol;Acc:HGNC:10548]	-	-	0	SMESG000022963.1:MSTRG.5414:MSTRG.12684:MSTRG.2221:MSTRG.10604:MSTRG.9479:MSTRG.5625:MSTRG.2171:MSTRG.23304:MSTRG.8862:MSTRG.5535:MSTRG.17691:MSTRG.16138:MSTRG.3741:MSTRG.12851:MSTRG.18888:MSTRG.4069:MSTRG.17209:MSTRG.1469:MSTRG.12466:MSTRG.7427:MSTRG.20979:MSTRG.6954:MSTRG.11214:MSTRG.14130:MSTRG.3824:MSTRG.8071:MSTRG.22379:MSTRG.9335:MSTRG.3166:MSTRG.7853:MSTRG.4161:MSTRG.1496:MSTRG.16685:MSTRG…	barhl1:tlx-1:nkx5-3:dbx:ets-3:foxA(P):foxC1:foxC2:fezf2:gfi1:zfp541:zfhx3:prdm14:hesl-3:nerfin2-1:lbx:lhx2-1:lhx2-4:lhx2-3:lmx1-1:lhx1-3:lhx3:msx:myoD:nf-ya1:nf-ya2:nr-1:nr2e1:tlx-2:onecut-1:onecut-2:onecut-3:onecut-5:hnf6:cux-2:pax2/5/8-1:Pbx-4:Prep:pou6-2:ctcf:zfp-10:zfp677:rx:scratch-like:shox:smad4-1:snail-1:snail-2:six4:da:ap4-1:uncx:znf333-2:znf207:alx4:prdm1-1:zfp-3:zfp878:zbed1:zscan2-7:i…	48
301	dd_Smes_g4_11	5692597	5693015	419	*	k27ac_pooled_april21_peak_2821	7.28206	Intron (SMEST006149001.1/MSTRG.1803, intron 1 of 2)	13	5694162	5698177	4016	1	MSTRG.1803	MSTRG.1803.2	-1147	0.0885534	0.0223488	-0.363902	-0.238367	0	0	0			ATXN1	ataxin 1 [Source:HGNC Symbol;Acc:HGNC:10548]	-	-	0	MSTRG.9597:MSTRG.6974:MSTRG.7998:MSTRG.23420:MSTRG.12684:MSTRG.4288:MSTRG.4289:MSTRG.22163:MSTRG.16827:MSTRG.9571:MSTRG.624:MSTRG.11386:MSTRG.22087:MSTRG.10044:MSTRG.5025:MSTRG.2221:MSTRG.14008:MSTRG.2484:MSTRG.1218:MSTRG.9193:MSTRG.19528:MSTRG.9479:MSTRG.5625:MSTRG.2171:MSTRG.13758:MSTRG.18815:MSTRG.21195:SMESG000072873.1:MSTRG.19883:MSTRG.3843:MSTRG.5337:MSTRG.14880:MSTRG.5693:MSTRG.10837:MSTRG…	pax3/7-1:alx3-2:Lox5a:Lox5b:nkx5-3:hinfp-1:hinfp-2:rest-1:zfp674:znf-1:znf91:znf333-1:znf652:zscan2-2:zscan2-6:dbx:dll-1:egr*-2:egr4-1:egr4-2:ets-1:foxA(P):foxC1:foxC2:foxN(P):foxQ/D:foxJ1-1:foxJ1-2:foxJ1-3:foxJ1-4:foxJ1-5:foxN2/3-1:foxN2/3-2:foxN2/3-3:foxK1:foxK2:foxK3:gcm-2:gli-3:nkx6-2:hnf4:hesl-2:nkx3-1:nkx5-2:nkx5-1:atmin:zscan2-4:cbt:klf-3:klf-1:lhx2-3:lmx1-1:lhx1-3:lhx3:meis-1:msx:smad1:sm…	70
302	dd_Smes_g4_11	5694983	5695090	108	*	k27ac_pooled_april21_peak_2822	7.68082	Promoter	13	5694162	5698177	4016	1	MSTRG.1803	MSTRG.1803.2	821	0.0885534	0.0223488	-0.767018	-0.260511	0	0	0			ATXN1	ataxin 1 [Source:HGNC Symbol;Acc:HGNC:10548]	-	-	0	MSTRG.10887:MSTRG.7998:MSTRG.23420:MSTRG.21923:MSTRG.9638:MSTRG.23513:MSTRG.10410:MSTRG.12684:MSTRG.19544:MSTRG.11379:MSTRG.22994:MSTRG.4327:MSTRG.19528:MSTRG.2656:MSTRG.23472:MSTRG.9479:MSTRG.5625:MSTRG.2171:MSTRG.18451:MSTRG.12975:MSTRG.17474:MSTRG.22990:MSTRG.16138:MSTRG.7287:MSTRG.19305:MSTRG.7792:MSTRG.6856:MSTRG.10592:MSTRG.17155:SMESG000049967.1:MSTRG.10215:MSTRG.15979:MSTRG.2271:MSTRG.742…	arnt-1:Lox5a:Lox5b:barhl2-1:barhl2-2:e22/23:bsx:nkx5-3:creb3l-1:ets-5:fli-2:fli-3:ets-1:etv4:fli-1:foxA(P):foxC1:foxC2:foxK1:foxK2:foxK3:gli-3:prdm14:nkx6-2:hesl-2:nkx3-1:nkx5-2:nkx5-1:atmin:zscan2-4:cbt:klf-1:egr-2:lhx1-3:meis-1:sall4:fir1:zfp-8:zfp236-1:zfp354:znf101:znf425:znf660:lmpt-3:smad1:smad9:mitfl-3:neuroD-1:fer3l-3:a:nr-1:nr2e1:tlx-2:hr51:neuroD-2:olig:pax2/5/8-1:pax6-1:pax6-2:phox:Pbx…	64
303	dd_Smes_g4_11	5694983	5695521	539	*	k27ac_pooled_april21_peak_2823	6.731	Promoter	13	5694162	5698177	4016	1	MSTRG.1803	MSTRG.1803.2	821	0.0885534	0.0223488	-0.767018	-0.260511	0	0	0			ATXN1	ataxin 1 [Source:HGNC Symbol;Acc:HGNC:10548]	-	-	0	MSTRG.10887:MSTRG.7998:MSTRG.23420:MSTRG.21923:MSTRG.9638:MSTRG.23513:MSTRG.10410:MSTRG.12684:MSTRG.19544:MSTRG.11379:MSTRG.22994:MSTRG.4327:MSTRG.19528:MSTRG.2656:MSTRG.23472:MSTRG.9479:MSTRG.5625:MSTRG.2171:MSTRG.18451:MSTRG.12975:MSTRG.17474:MSTRG.22990:MSTRG.16138:MSTRG.7287:MSTRG.19305:MSTRG.7792:MSTRG.6856:MSTRG.10592:MSTRG.17155:SMESG000049967.1:MSTRG.10215:MSTRG.15979:MSTRG.2271:MSTRG.742…	arnt-1:Lox5a:Lox5b:barhl2-1:barhl2-2:e22/23:bsx:nkx5-3:creb3l-1:ets-5:fli-2:fli-3:ets-1:etv4:fli-1:foxA(P):foxC1:foxC2:foxK1:foxK2:foxK3:gli-3:prdm14:nkx6-2:hesl-2:nkx3-1:nkx5-2:nkx5-1:atmin:zscan2-4:cbt:klf-1:egr-2:lhx1-3:meis-1:sall4:fir1:zfp-8:zfp236-1:zfp354:znf101:znf425:znf660:lmpt-3:smad1:smad9:mitfl-3:neuroD-1:fer3l-3:a:nr-1:nr2e1:tlx-2:hr51:neuroD-2:olig:pax2/5/8-1:pax6-1:pax6-2:phox:Pbx…	64
304	dd_Smes_g4_11	5695074	5695521	448	*	k27ac_pooled_april21_peak_2824	6.52734	Promoter	13	5694162	5698177	4016	1	MSTRG.1803	MSTRG.1803.2	912	0.0885534	0.0223488	-0.783489	-0.232391	0	0	0			ATXN1	ataxin 1 [Source:HGNC Symbol;Acc:HGNC:10548]	-	-	0	MSTRG.10887:MSTRG.7998:MSTRG.23420:MSTRG.21923:MSTRG.9638:MSTRG.23513:MSTRG.10410:MSTRG.12684:MSTRG.19544:MSTRG.11379:MSTRG.22994:MSTRG.4327:MSTRG.19528:MSTRG.2656:MSTRG.23472:MSTRG.9479:MSTRG.5625:MSTRG.2171:MSTRG.18451:MSTRG.12975:MSTRG.17474:MSTRG.22990:MSTRG.16138:MSTRG.7287:MSTRG.19305:MSTRG.7792:MSTRG.6856:MSTRG.10592:MSTRG.17155:SMESG000049967.1:MSTRG.10215:MSTRG.15979:MSTRG.2271:MSTRG.742…	arnt-1:Lox5a:Lox5b:barhl2-1:barhl2-2:e22/23:bsx:nkx5-3:creb3l-1:ets-5:fli-2:fli-3:ets-1:etv4:fli-1:foxA(P):foxC1:foxC2:foxK1:foxK2:foxK3:gli-3:prdm14:nkx6-2:hesl-2:nkx3-1:nkx5-2:nkx5-1:atmin:zscan2-4:cbt:klf-1:egr-2:lhx1-3:meis-1:sall4:fir1:zfp-8:zfp236-1:zfp354:znf101:znf425:znf660:lmpt-3:smad1:smad9:mitfl-3:neuroD-1:fer3l-3:a:nr-1:nr2e1:tlx-2:hr51:neuroD-2:olig:pax2/5/8-1:pax6-1:pax6-2:phox:Pbx…	64
305	dd_Smes_g4_11	5696608	5697292	685	*	k27ac_pooled_april21_peak_2825	8.24748	Promoter	13	5696598	5698177	1580	1	MSTRG.1803	MSTRG.1803.5	10	0.0885534	0.0223488	-0.602138	-0.315959	0	0	0			ATXN1	ataxin 1 [Source:HGNC Symbol;Acc:HGNC:10548]	-	-	0	MSTRG.7998:MSTRG.23420:MSTRG.1217:MSTRG.4483:MSTRG.17936:MSTRG.5414:MSTRG.12684:MSTRG.4288:MSTRG.4289:MSTRG.22163:MSTRG.16827:MSTRG.9571:MSTRG.624:MSTRG.11386:MSTRG.22087:MSTRG.10044:MSTRG.5025:MSTRG.20458:MSTRG.2221:MSTRG.2484:MSTRG.1218:MSTRG.9193:MSTRG.20466:MSTRG.17923:MSTRG.7287:MSTRG.1469:MSTRG.12466:MSTRG.7427:MSTRG.1897:MSTRG.6954:MSTRG.8925:MSTRG.4330:MSTRG.14931:MSTRG.12358:MSTRG.19417:…	Lox5a:Lox5b:egr-5:znf362:zf-4:tlx-1:nkx5-3:hinfp-1:hinfp-2:rest-1:zfp674:znf-1:znf91:znf333-1:znf652:zscan2-2:zscan2-6:rest-2:dbx:egr*-2:egr4-1:egr4-2:gli-1:gli-2:nkx6-2:lhx2-3:lmx1-1:lhx1-3:meis-1:msx:sall4:fir1:zfp-8:zfp236-1:zfp354:znf101:znf425:znf660:lmpt-3:mitfl-3:myoD:nf-ya1:nf-ya2:nr-1:nr2e1:tlx-2:otx-1:otx-2:pitx:znf181:zbtb24:ski-1:ctcf:zfp-10:zfp677:rx:scratch-like:shox:smad4-1:sp5:sre…	51
306	dd_Smes_g4_11	5707398	5707960	563	*	k27ac_pooled_april21_peak_2834	5.39301	Distal Intergenic	13	5696598	5698177	1580	1	MSTRG.1803	MSTRG.1803.5	10800	0.0885534	0.0223488	-0.574229	-0.78282	0	0	0			ATXN1	ataxin 1 [Source:HGNC Symbol;Acc:HGNC:10548]	-	-	0	MSTRG.9597:MSTRG.7998:MSTRG.23420:MSTRG.4288:MSTRG.4289:MSTRG.22163:MSTRG.16827:MSTRG.9571:MSTRG.624:MSTRG.11386:MSTRG.22087:MSTRG.10044:MSTRG.5025:MSTRG.20458:MSTRG.2484:MSTRG.1218:MSTRG.9193:MSTRG.5081:MSTRG.19528:MSTRG.22528:MSTRG.19546:MSTRG.7741:MSTRG.3929:MSTRG.6819:MSTRG.11814:MSTRG.10087:MSTRG.20250:MSTRG.18815:MSTRG.21195:SMESG000072873.1:MSTRG.19883:MSTRG.3843:MSTRG.5337:MSTRG.14880:MST…	pax3/7-1:Lox5a:Lox5b:hinfp-1:hinfp-2:rest-1:zfp674:znf-1:znf91:znf333-1:znf652:zscan2-2:zscan2-6:rest-2:egr*-2:egr4-1:egr4-2:emx1:ets-1:foxD1:foxD2:foxD3:foxG:foxL1:foxO:pou-p1:foxP:foxQ/D:foxJ1-1:foxJ1-2:foxJ1-3:foxJ1-4:foxJ1-5:foxN2/3-1:foxN2/3-2:foxN2/3-3:foxK1:foxK2:foxK3:gli-1:gli-2:nkx6-2:Hox1:Hox4a:Hox3a:nerfin2-1:isl-1:isl-2:atmin:zscan2-4:cbt:klf-3:klf-1:egr-2:lhx1-3:lhx3:meis-1:meox:sal…	56
307	dd_Smes_g4_11	5707937	5707960	24	*	k27ac_pooled_april21_peak_2835	5.29633	Distal Intergenic	13	5696598	5698177	1580	1	MSTRG.1803	MSTRG.1803.5	11339	0.0885534	0.0223488	-0.608332	-0.769485	0	0	0			ATXN1	ataxin 1 [Source:HGNC Symbol;Acc:HGNC:10548]	-	-	0	MSTRG.9597:MSTRG.7998:MSTRG.23420:MSTRG.4288:MSTRG.4289:MSTRG.22163:MSTRG.16827:MSTRG.9571:MSTRG.624:MSTRG.11386:MSTRG.22087:MSTRG.10044:MSTRG.5025:MSTRG.20458:MSTRG.2221:MSTRG.2484:MSTRG.1218:MSTRG.9193:MSTRG.5081:MSTRG.19528:MSTRG.22528:MSTRG.19546:MSTRG.7741:MSTRG.3929:MSTRG.6819:MSTRG.11814:MSTRG.10087:MSTRG.20250:MSTRG.13758:MSTRG.18815:MSTRG.21195:SMESG000072873.1:MSTRG.19883:MSTRG.3843:MST…	pax3/7-1:Lox5a:Lox5b:hinfp-1:hinfp-2:rest-1:zfp674:znf-1:znf91:znf333-1:znf652:zscan2-2:zscan2-6:rest-2:dbx:egr*-2:egr4-1:egr4-2:emx1:ets-1:foxD1:foxD2:foxD3:foxG:foxL1:foxO:pou-p1:foxP:foxN(P):foxQ/D:foxJ1-1:foxJ1-2:foxJ1-3:foxJ1-4:foxJ1-5:foxN2/3-1:foxN2/3-2:foxN2/3-3:foxK1:foxK2:foxK3:gli-1:gli-2:fezf2:gfi1:zfp541:zfhx3:nkx6-2:hnf4:Hox4b:Hox1:Hox4a:Hox3a:nerfin2-1:isl-1:isl-2:atmin:zscan2-4:cb…	64
308	dd_Smes_g4_11	6138614	6139049	436	*	k27ac_pooled_april21_peak_2855	3.86507	Promoter	13	6117991	6138598	20608	2	MSTRG.1817	MSTRG.1817.3	-16	1.48121	0.333386	-1.06992	-0.962962	0	0	0	0.929784	0.0526874	-	-	-	-	0	MSTRG.9597:MSTRG.6974:MSTRG.5414:MSTRG.12684:MSTRG.19544:MSTRG.5625:MSTRG.2171:MSTRG.22528:MSTRG.19546:MSTRG.7741:MSTRG.3929:MSTRG.6819:MSTRG.11814:MSTRG.10087:MSTRG.20250:MSTRG.13758:MSTRG.18815:MSTRG.21195:SMESG000072873.1:MSTRG.19883:MSTRG.3843:MSTRG.5337:MSTRG.14880:MSTRG.5693:MSTRG.10837:MSTRG.23309:MSTRG.9120:MSTRG.23304:MSTRG.8862:MSTRG.5535:MSTRG.17691:MSTRG.3741:MSTRG.4403:MSTRG.19305:MS…	pax3/7-1:alx3-2:tlx-1:nkx5-3:creb3l-1:foxC1:foxC2:foxD1:foxD2:foxD3:foxG:foxL1:foxO:pou-p1:foxP:foxN(P):foxQ/D:foxJ1-1:foxJ1-2:foxJ1-3:foxJ1-4:foxJ1-5:foxN2/3-1:foxN2/3-2:foxN2/3-3:gata123:gata456-3:fezf2:gfi1:zfp541:zfhx3:hesl-3:hnf4:hesl-2:Hox1:Hox4a:Hox3a:isl-1:isl-2:lbx:lhx2-1:lhx2-4:lhx1-3:lhx3:meis-1:musculin:myoD:pdp1:nr2f1:nr4a-1:nr4a-2:onecut-1:onecut-2:onecut-3:onecut-5:hnf6:cux-2:Pbx-4…	58
309	dd_Smes_g4_11	6174733	6175024	292	*	k27ac_pooled_april21_peak_2858	3.12358	Distal Intergenic	13	6207533	6208088	556	1	MSTRG.1819	MSTRG.1819.1	-32509	0.981853	0.29979	-0.50503	-0.661706	0	0	0			NIPAL2	NIPA like domain containing 2 [Source:HGNC Symbol;Acc:HGNC:25854]	MSTRG.5260:MSTRG.23512:MSTRG.9977:MSTRG.16922:MSTRG.22352:MSTRG.2646	ctcf:zfp-10:zfp677:srebp:pou2/3-1:pou2/3-2	3	MSTRG.7896:MSTRG.7998:MSTRG.23420:MSTRG.1217:MSTRG.4483:MSTRG.17936:MSTRG.12684:MSTRG.4288:MSTRG.4289:MSTRG.22163:MSTRG.16827:MSTRG.9571:MSTRG.624:MSTRG.11386:MSTRG.22087:MSTRG.10044:MSTRG.5025:MSTRG.2221:MSTRG.2484:MSTRG.1218:MSTRG.9193:MSTRG.11379:MSTRG.22994:MSTRG.4327:MSTRG.19528:MSTRG.2731:MSTRG.23472:MSTRG.9479:MSTRG.5625:MSTRG.2171:MSTRG.22528:MSTRG.19546:MSTRG.7741:MSTRG.3929:MSTRG.6819:M…	znf596:Lox5a:Lox5b:egr-5:znf362:zf-4:nkx5-3:hinfp-1:hinfp-2:rest-1:zfp674:znf-1:znf91:znf333-1:znf652:zscan2-2:zscan2-6:dbx:egr*-2:egr4-1:egr4-2:ets-5:fli-2:fli-3:ets-1:elf1:fli-1:foxA(P):foxC1:foxC2:foxD1:foxD2:foxD3:foxG:foxL1:foxO:pou-p1:foxP:foxN(P):gli-1:gli-2:gli-3:fezf2:gfi1:zfp541:zfhx3:prdm14:nkx6-2:lbx:lhx1-3:lhx3:Mef2-2:meis-1:smad1:smad9:pdp1:nr-1:nr2e1:tlx-2:hr51:pou6-2:znf181:zbtb24…	57
310	dd_Smes_g4_11	6214889	6215087	199	*	k27ac_pooled_april21_peak_2867	8.19825	Promoter	13	6207020	6214979	7960	2	MSTRG.1818	MSTRG.1818.4	0	8.24027	0.171534	-0.0687953	-0.159414	0	0	0	0.813508	0.109575	RGS10	regulator of G protein signaling 10 [Source:HGNC Symbol;Acc:HGNC:9992]	MSTRG.9913:MSTRG.21518:MSTRG.8960:MSTRG.22352:MSTRG.2646	Hox3a:znf207:rxra:pou2/3-1:pou2/3-2	4	MSTRG.7998:MSTRG.23420:MSTRG.1217:MSTRG.4483:MSTRG.17936:MSTRG.12684:MSTRG.22126:SMESG000049970.1:SMESG000031904.1:MSTRG.221:MSTRG.2221:MSTRG.9479:MSTRG.7287:MSTRG.4403:MSTRG.10592:MSTRG.17155:SMESG000049967.1:MSTRG.10215:MSTRG.10177:MSTRG.15979:MSTRG.2271:MSTRG.1469:MSTRG.12466:MSTRG.7427:MSTRG.2947:MSTRG.1897:MSTRG.6954:MSTRG.4208:MSTRG.16892:MSTRG.14130:MSTRG.3824:MSTRG.6003:MSTRG.8071:MSTRG.2…	Lox5a:Lox5b:egr-5:znf362:zf-4:nkx5-3:zfp560-1:zscan2-5:zscan2-8:zf-6:dbx:foxA(P):nkx6-2:hnf4:nkx5-1:atmin:zscan2-4:cbt:klf-3:klf-1:egr-2:lhx2-3:lmx1-1:lhx1-3:Mef2-2:meis-1:msx:smad1:smad9:nf-ya1:nf-ya2:nkx2l-1:nr-1:nr2e1:tlx-2:neuroD-2:olig:phox:Xfin:zfp-4:zbed-1:zf-5:pou1:pou4-1:pou4-2:zfp-7:ctcf:zfp-10:zfp677:shox:klf-2:uncx:zeb-1:zfp-2:zfp236-2:zfp560-2:znf799:zscan2-1:Lox4:alx4:egr4-3:irx-1:i…	47
311	dd_Smes_g4_11	6490960	6491050	91	*	k27ac_pooled_april21_peak_2873	3.32302	Promoter	13	6489874	6490542	669	2	MSTRG.1823	MSTRG.1823.1	-418	0	0	-0.117129	0.0169318	0	0	0				novel immunoglobulin kappa variable gene	MSTRG.22990:MSTRG.10215:MSTRG.10177:MSTRG.15979:MSTRG.3565:MSTRG.7049:MSTRG.19418:MSTRG.20936:MSTRG.396:MSTRG.15425:MSTRG.19918:MSTRG.16922:MSTRG.7499:MSTRG.16707:MSTRG.22089:MSTRG.1069:MSTRG.10038:MSTRG.22352:MSTRG.2646	gli-3:cbt:klf-3:klf-1:Xfin:zfp-4:zbed-1:zf-5:klf-2:sp6-9:sp8:srebp:zfp-2:zfp236-2:zfp560-2:znf799:zscan2-1:pou2/3-1:pou2/3-2	10	MSTRG.7896:MSTRG.7998:MSTRG.23420:MSTRG.1217:MSTRG.4483:MSTRG.17936:MSTRG.4288:MSTRG.4289:MSTRG.22163:MSTRG.16827:MSTRG.9571:MSTRG.624:MSTRG.11386:MSTRG.22087:MSTRG.10044:MSTRG.5025:MSTRG.20458:MSTRG.19091:MSTRG.10604:MSTRG.11379:MSTRG.22994:MSTRG.4327:MSTRG.19528:MSTRG.2656:MSTRG.23472:MSTRG.9479:MSTRG.5625:MSTRG.2171:MSTRG.22528:MSTRG.19546:MSTRG.7741:MSTRG.22295:MSTRG.19765:MSTRG.3929:MSTRG.68…	znf596:Lox5a:Lox5b:egr-5:znf362:zf-4:hinfp-1:hinfp-2:rest-1:zfp674:znf-1:znf91:znf333-1:znf652:zscan2-2:zscan2-6:rest-2:coe:ets-3:ets-5:fli-2:fli-3:ets-1:etv4:fli-1:foxA(P):foxC1:foxC2:foxD1:foxD2:foxD3:foxF1 :foxF2:foxG:foxL1:foxO:pou-p1:foxP:foxN(P):foxQ/D:foxJ1-1:foxJ1-2:foxJ1-3:foxJ1-4:foxJ1-5:foxN2/3-1:foxN2/3-2:foxN2/3-3:foxK1:foxK2:foxK3:gata123:gata456-3:gli-1:gli-2:gata456-1:gata456-2:ga…	66
312	dd_Smes_g4_11	7620556	7620767	212	*	k27ac_pooled_april21_peak_2896	3.0314	Intron (SMEST006381001.1/MSTRG.1852, intron 17 of 18)	13	7613318	7625811	12494	1	MSTRG.1852	MSTRG.1852.5	7238	0.429909	0.0163358	-0.41664	-0.180312	1	1	1	0.0131407	-1.48846	ANO7	anoctamin 7 [Source:HGNC Symbol;Acc:HGNC:31677]	-	-	0	MSTRG.7896:MSTRG.7998:MSTRG.23420:MSTRG.1217:MSTRG.4483:MSTRG.17936:MSTRG.4288:MSTRG.4289:MSTRG.22163:MSTRG.16827:MSTRG.9571:MSTRG.624:MSTRG.11386:MSTRG.22087:MSTRG.10044:MSTRG.5025:MSTRG.20458:MSTRG.2484:MSTRG.1218:MSTRG.9193:MSTRG.5625:MSTRG.2171:MSTRG.22295:MSTRG.19765:MSTRG.18815:MSTRG.21195:SMESG000072873.1:MSTRG.19883:MSTRG.3843:MSTRG.5337:MSTRG.14880:MSTRG.5693:MSTRG.10837:MSTRG.23309:MSTR…	znf596:Lox5a:Lox5b:egr-5:znf362:zf-4:hinfp-1:hinfp-2:rest-1:zfp674:znf-1:znf91:znf333-1:znf652:zscan2-2:zscan2-6:rest-2:egr*-2:egr4-1:egr4-2:foxC1:foxC2:foxF1 :foxF2:foxQ/D:foxJ1-1:foxJ1-2:foxJ1-3:foxJ1-4:foxJ1-5:foxN2/3-1:foxN2/3-2:foxN2/3-3:gata123:gata456-3:gli-1:gli-2:gata456-1:gata456-2:gata456-4:prdm14:nkx6-2:hesl-2:nerfin2-1:atmin:zscan2-4:klf-3:klf-1:lbx:lhx1-3:lhx3:smad1:smad9:pdp1:nkx2l…	55
313	dd_Smes_g4_11	8606153	8606348	196	*	k27ac_pooled_april21_peak_2923	3.5134	Promoter	13	8603696	8605214	1519	2	MSTRG.1891	SMEST006521001.1	-939	0.599268	0.45939	-0.49219	-0.784246	0	0	0	0.276168	0.601343	DMRTA1	DMRT like family A1 [Source:HGNC Symbol;Acc:HGNC:13826]	-	-	0	MSTRG.7896:MSTRG.21923:MSTRG.9638:MSTRG.5414:MSTRG.12684:MSTRG.22126:SMESG000049970.1:SMESG000031904.1:MSTRG.221:MSTRG.2221:MSTRG.9479:MSTRG.5625:MSTRG.2171:MSTRG.22528:MSTRG.19546:MSTRG.7741:MSTRG.22295:MSTRG.19765:MSTRG.3929:MSTRG.6819:MSTRG.11814:MSTRG.10087:MSTRG.20250:MSTRG.13758:MSTRG.18815:MSTRG.21195:SMESG000072873.1:MSTRG.19883:MSTRG.3843:MSTRG.5337:MSTRG.14880:MSTRG.5693:MSTRG.10837:MST…	znf596:barhl2-1:barhl2-2:tlx-1:nkx5-3:zfp560-1:zscan2-5:zscan2-8:zf-6:dbx:foxA(P):foxC1:foxC2:foxD1:foxD2:foxD3:foxF1 :foxF2:foxG:foxL1:foxO:pou-p1:foxP:foxN(P):foxQ/D:foxJ1-1:foxJ1-2:foxJ1-3:foxJ1-4:foxJ1-5:foxN2/3-1:foxN2/3-2:foxN2/3-3:foxK1:foxK2:foxK3:gli-1:gli-2:gli-3:fezf2:gfi1:zfp541:zfhx3:prdm14:nkx5-1:isl-1:isl-2:lhx1-3:lhx3:myoD:nf-ya1:nf-ya2:nkx2l-1:a:nkx3-2:otx-1:otx-2:pax6-1:pax6-2:p…	57
314	dd_Smes_g4_11	8706471	8706918	448	*	k27ac_pooled_april21_peak_2931	12.3964	Promoter	13	8706385	8707084	700	2	MSTRG.1897	MSTRG.1897.2	166	3.48972	0.266679	-0.580599	-0.381762	0	0	0	0.386352	-0.349331	CHD9	chromodomain helicase DNA binding protein 9 [Source:HGNC Symbol;Acc:HGNC:25701]	-	-	0	MSTRG.10887:MSTRG.7896:MSTRG.7998:MSTRG.23420:SMESG000022963.1:MSTRG.1217:MSTRG.4483:MSTRG.17936:MSTRG.4288:MSTRG.4289:MSTRG.22163:MSTRG.16827:MSTRG.9571:MSTRG.624:MSTRG.11386:MSTRG.22087:MSTRG.10044:MSTRG.5025:MSTRG.2221:MSTRG.14008:MSTRG.2484:MSTRG.1218:MSTRG.9193:MSTRG.5081:MSTRG.23472:MSTRG.9479:MSTRG.5625:MSTRG.2171:MSTRG.22528:MSTRG.19546:MSTRG.7741:MSTRG.22295:MSTRG.19765:MSTRG.3929:MSTRG.…	arnt-1:znf596:Lox5a:Lox5b:barhl1:egr-5:znf362:zf-4:hinfp-1:hinfp-2:rest-1:zfp674:znf-1:znf91:znf333-1:znf652:zscan2-2:zscan2-6:dbx:dll-1:egr*-2:egr4-1:egr4-2:emx1:fli-1:foxA(P):foxC1:foxC2:foxD1:foxD2:foxD3:foxF1 :foxF2:foxG:foxL1:foxO:pou-p1:foxP:foxN(P):foxQ/D:foxJ1-1:foxJ1-2:foxJ1-3:foxJ1-4:foxJ1-5:foxN2/3-1:foxN2/3-2:foxN2/3-3:foxK1:foxK2:foxK3:gcm-2:gli-1:gli-2:gli-3:fezf2:gfi1:zfp541:zfhx3:…	95
315	dd_Smes_g4_11	8721177	8721978	802	*	k27ac_pooled_april21_peak_2937	3.12358	Promoter	13	8706385	8722804	16420	2	MSTRG.1897	SMEST006530001.1	826	3.48972	0.266679	-0.872862	-0.673525	0	0	0	0.386352	-0.349331	CHD9	chromodomain helicase DNA binding protein 9 [Source:HGNC Symbol;Acc:HGNC:25701]	-	-	0	MSTRG.7896:MSTRG.9597:MSTRG.6974:MSTRG.21923:MSTRG.9638:MSTRG.1217:MSTRG.4483:MSTRG.17936:MSTRG.2484:MSTRG.1218:MSTRG.9193:MSTRG.13758:MSTRG.18451:MSTRG.12975:MSTRG.17474:MSTRG.11405:MSTRG.23304:MSTRG.8862:MSTRG.5535:MSTRG.17691:MSTRG.16138:MSTRG.19305:MSTRG.9913:MSTRG.17848:MSTRG.9911:MSTRG.17155:SMESG000049967.1:MSTRG.10215:MSTRG.18888:MSTRG.7427:MSTRG.20979:MSTRG.1897:MSTRG.2717:MSTRG.11214:MS…	znf596:pax3/7-1:alx3-2:barhl2-1:barhl2-2:egr-5:znf362:zf-4:egr*-2:egr4-1:egr4-2:foxN(P):foxK1:foxK2:foxK3:gcm-2:fezf2:gfi1:zfp541:zfhx3:prdm14:hesl-2:Hox3a:isl-1:isl-2:atmin:zscan2-4:cbt:lbx:lhx1-3:lhx3:meis-1:mitfl-3:myoD:nf-ya1:nf-ya2:nkx2l-1:nkx3-2:nr-1:nr2e1:tlx-2:onecut-1:onecut-2:onecut-3:onecut-5:hnf6:cux-2:pax2/5/8-1:Pbx-4:Prep:Xfin:zfp-4:zbed-1:zf-5:pou1:zfp-7:ctcf:zfp-10:zfp677:rx:scrat…	56
316	dd_Smes_g4_11	8724251	8724462	212	*	k27ac_pooled_april21_peak_2938	7.55508	Distal Intergenic	13	8706385	8722804	16420	2	MSTRG.1897	SMEST006530002.1	-1447	3.48972	0.266679	-1.03124	-0.507258	0	0	0	0.386352	-0.349331	CHD9	chromodomain helicase DNA binding protein 9 [Source:HGNC Symbol;Acc:HGNC:25701]	-	-	0	MSTRG.7896:MSTRG.1217:MSTRG.4483:MSTRG.17936:MSTRG.2484:MSTRG.1218:MSTRG.9193:MSTRG.10604:MSTRG.11379:MSTRG.22994:MSTRG.4327:MSTRG.2656:MSTRG.2731:MSTRG.23472:MSTRG.20466:MSTRG.17923:MSTRG.22990:MSTRG.23304:MSTRG.8862:MSTRG.5535:MSTRG.17691:MSTRG.13843:MSTRG.12851:MSTRG.15979:MSTRG.18888:MSTRG.7427:MSTRG.20979:MSTRG.1897:MSTRG.8925:MSTRG.4330:MSTRG.14931:MSTRG.12358:MSTRG.19417:MSTRG.432:MSTRG.21…	znf596:egr-5:znf362:zf-4:egr*-2:egr4-1:egr4-2:ets-3:ets-5:fli-2:fli-3:etv4:elf1:fli-1:gli-1:gli-2:gli-3:fezf2:gfi1:zfp541:zfhx3:Hox4b:nerfin2-1:klf-1:lbx:lhx1-3:lhx3:meis-1:sall4:fir1:zfp-8:zfp236-1:zfp354:znf101:znf425:znf660:lmpt-3:smad1:smad9:myoD:nr2f1:nr4a-1:nr4a-2:onecut-1:onecut-2:onecut-3:onecut-5:hnf6:cux-2:otx-1:otx-2:pax2/5/8-1:pitx:Xfin:zfp-4:zbed-1:zf-5:znf181:zbtb24:ski-1:zfp-7:gtf2…	55
317	dd_Smes_g4_11	8765886	8766300	415	*	k27ac_pooled_april21_peak_2954	2.88457	Distal Intergenic	13	8770532	8772182	1651	1	MSTRG.1898	SMEST006534001.1	-4232	0.846217	0.0410635	-0.277864	-0.0368063	0	0	0	0.903343	-0.180481	-	-	MSTRG.23304:MSTRG.8862:MSTRG.5535:MSTRG.17691	fezf2:gfi1:zfp541:zfhx3	1	MSTRG.10887:MSTRG.7896:MSTRG.9597:MSTRG.6974:MSTRG.7998:MSTRG.23420:MSTRG.21923:MSTRG.9638:MSTRG.10410:MSTRG.5414:MSTRG.19544:MSTRG.4288:MSTRG.4289:MSTRG.22163:MSTRG.16827:MSTRG.9571:MSTRG.624:MSTRG.11386:MSTRG.22087:MSTRG.10044:MSTRG.5025:MSTRG.20458:MSTRG.2221:MSTRG.2484:MSTRG.1218:MSTRG.9193:MSTRG.11405:MSTRG.20466:MSTRG.17923:MSTRG.7287:MSTRG.13843:MSTRG.19305:MSTRG.9913:MSTRG.12851:MSTRG.171…	arnt-1:znf596:pax3/7-1:alx3-2:Lox5a:Lox5b:barhl2-1:barhl2-2:bsx:tlx-1:creb3l-1:hinfp-1:hinfp-2:rest-1:zfp674:znf-1:znf91:znf333-1:znf652:zscan2-2:zscan2-6:rest-2:dbx:egr*-2:egr4-1:egr4-2:gcm-2:gli-1:gli-2:nkx6-2:Hox4b:hesl-2:Hox3a:nerfin2-1:atmin:zscan2-4:cbt:klf-3:klf-1:lbx:lhx1-3:lhx3:meis-1:mlx:sall4:fir1:zfp-8:zfp236-1:zfp354:znf101:znf425:znf660:lmpt-3:smad1:smad9:pdp1:nr-1:nr2e1:tlx-2:otx-1…	65
318	dd_Smes_g4_11	8767083	8767420	338	*	k27ac_pooled_april21_peak_2955	6.01659	Distal Intergenic	13	8770532	8772182	1651	1	MSTRG.1898	SMEST006534001.1	-3112	0.846217	0.0410635	-0.564068	-0.500236	0	0	0	0.903343	-0.180481	-	-	-	-	0	MSTRG.10887:MSTRG.7896:MSTRG.7998:MSTRG.23420:MSTRG.21923:MSTRG.9638:MSTRG.5414:MSTRG.12684:MSTRG.19544:MSTRG.4288:MSTRG.4289:MSTRG.22163:MSTRG.16827:MSTRG.9571:MSTRG.624:MSTRG.11386:MSTRG.22087:MSTRG.10044:MSTRG.5025:MSTRG.20458:MSTRG.2221:MSTRG.2484:MSTRG.1218:MSTRG.9193:MSTRG.5081:MSTRG.9479:MSTRG.22528:MSTRG.19546:MSTRG.7741:MSTRG.6819:MSTRG.11814:MSTRG.10087:MSTRG.20250:MSTRG.13758:MSTRG.188…	arnt-1:znf596:Lox5a:Lox5b:barhl2-1:barhl2-2:tlx-1:nkx5-3:creb3l-1:hinfp-1:hinfp-2:rest-1:zfp674:znf-1:znf91:znf333-1:znf652:zscan2-2:zscan2-6:rest-2:dbx:egr*-2:egr4-1:egr4-2:emx1:foxA(P):foxD1:foxD2:foxD3:foxL1:foxO:pou-p1:foxP:foxN(P):foxQ/D:foxJ1-1:foxJ1-2:foxJ1-3:foxJ1-4:foxJ1-5:foxN2/3-1:foxN2/3-2:foxN2/3-3:gli-3:hesl-3:nkx6-2:Hox4b:hesl-2:Hox1:Hox4a:Hox3a:isl-1:isl-2:cbt:klf-3:lbx:lhx2-3:lmx…	89
319	dd_Smes_g4_110	189689	190341	653	*	k27ac_pooled_april21_peak_2962	7.49563	Distal Intergenic	14	193526	200319	6794	1	MSTRG.1910	SMEST003594001.1	-3185	0.527137	0.453213	-0.64887	-0.0679233	0	0	0	0.305574	0.67053	-	-	MSTRG.7998:MSTRG.23420:MSTRG.10410:MSTRG.20466:MSTRG.17923:MSTRG.7287:MSTRG.586:MSTRG.23136:MSTRG.10065:MSTRG.8421:MSTRG.12215:MSTRG.21546:MSTRG.16922:MSTRG.12623:MSTRG.17183:MSTRG.20330:MSTRG.21518:MSTRG.13724:MSTRG.7450:MSTRG.5557:MSTRG.572:MSTRG.18286	Lox5a:Lox5b:bsx:gli-1:gli-2:nkx6-2:pdp1:hr51:otx-1:otx-2:pax6-1:pax6-2:srebp:yy2:zbed8:znf333-2:znf207:Lox4:irx-1:irx6-1:irx6-2:irx6-3	14	MSTRG.7998:MSTRG.23420:MSTRG.22126:SMESG000049970.1:SMESG000031904.1:MSTRG.221:MSTRG.14008:MSTRG.2484:MSTRG.1218:MSTRG.9193:MSTRG.22990:MSTRG.23304:MSTRG.8862:MSTRG.5535:MSTRG.17691:MSTRG.16138:MSTRG.12851:MSTRG.3166:MSTRG.7853:MSTRG.4161:MSTRG.1496:MSTRG.16685:MSTRG.1504:MSTRG.3565:MSTRG.7049:MSTRG.19418:MSTRG.20936:MSTRG.14619:MSTRG.5418:MSTRG.15672:MSTRG.6725:MSTRG.10612:MSTRG.22489:MSTRG.1767…	Lox5a:Lox5b:zfp560-1:zscan2-5:zscan2-8:zf-6:dll-1:egr*-2:egr4-1:egr4-2:gli-3:fezf2:gfi1:zfp541:zfhx3:prdm14:nerfin2-1:onecut-1:onecut-2:onecut-3:onecut-5:hnf6:cux-2:Xfin:zfp-4:zbed-1:zf-5:zfp-7:rfx3:rfx4:rfx7:rx:snail-1:snail-2:sp6-9:sp8:zeb-1:egr-1:ovo-1:prdm13:gl:znf341:zfp-2:zfp236-2:zfp560-2:znf799:zscan2-1:prdm1-1:zfp-3:zfp878:zbed1:zscan2-7:ikzf1:zfp362:gcm-1:osr-1:osr-2:six1/2-2:six1/2-3:n…	26
320	dd_Smes_g4_110	194195	194451	257	*	k27ac_pooled_april21_peak_2963	5.31577	Promoter	14	193526	200319	6794	1	MSTRG.1910	SMEST003594001.1	669	0.527137	0.453213	-0.491834	-0.345886	0	0	0	0.305574	0.67053	-	-	MSTRG.10887:MSTRG.7896:MSTRG.12684:MSTRG.4288:MSTRG.4289:MSTRG.22163:MSTRG.16827:MSTRG.9571:MSTRG.624:MSTRG.11386:MSTRG.22087:MSTRG.10044:MSTRG.5025:MSTRG.11405:MSTRG.23304:MSTRG.8862:MSTRG.5535:MSTRG.17691:MSTRG.16138:MSTRG.18888:MSTRG.1469:MSTRG.12466:MSTRG.7427:MSTRG.20979:MSTRG.6445:MSTRG.6954:MSTRG.4208:MSTRG.16892:MSTRG.11214:MSTRG.14130:MSTRG.3824:MSTRG.12215:MSTRG.21546:MSTRG.9027:MSTRG.1…	arnt-1:znf596:nkx5-3:hinfp-1:hinfp-2:rest-1:zfp674:znf-1:znf91:znf333-1:znf652:zscan2-2:zscan2-6:gcm-2:fezf2:gfi1:zfp541:zfhx3:prdm14:lbx:lhx2-3:lmx1-1:lhx1-3:lhx3:musculin:msx:smad1:smad9:myoD:nf-ya1:nf-ya2:pax6-1:pax6-2:scratch-like:shox:smad4-1:snail-1:snail-2:tal:ptf-4:da:ap4-1:ptf-5:uncx:alx4:foxA1:foxA2:hb-1:hb-2:arx:onecut-4:otp:nkx1:nkx1-1:nkx1-2:twist:pou2/3-1:pou2/3-2	36	MSTRG.10887:MSTRG.7998:MSTRG.23420:MSTRG.21923:MSTRG.9638:SMESG000022963.1:MSTRG.2484:MSTRG.1218:MSTRG.9193:MSTRG.11379:MSTRG.22994:MSTRG.4327:MSTRG.23472:MSTRG.20466:MSTRG.17923:MSTRG.22990:MSTRG.7287:MSTRG.4403:MSTRG.17155:SMESG000049967.1:MSTRG.10215:MSTRG.10177:MSTRG.15979:MSTRG.8925:MSTRG.4330:MSTRG.14931:MSTRG.12358:MSTRG.19417:MSTRG.432:MSTRG.21315:MSTRG.6529:MSTRG.3802:MSTRG.2717:MSTRG.60…	arnt-1:Lox5a:Lox5b:barhl2-1:barhl2-2:barhl1:egr*-2:egr4-1:egr4-2:ets-5:fli-2:fli-3:fli-1:gli-1:gli-2:gli-3:nkx6-2:hnf4:atmin:zscan2-4:cbt:klf-3:klf-1:sall4:fir1:zfp-8:zfp236-1:zfp354:znf101:znf425:znf660:lmpt-3:mitfl-3:nkx2l-1:a:pou4-1:pou4-2:zfp-7:kdm5b:sp5:klf-2:sp6-9:sp8:znf333-2:znf207:znf143:zic-1:zic-2:egr-1:ovo-1:prdm13:gl:znf341:Lox4:egr4-3:irx-1:irx6-1:irx6-2:irx6-3:six1/2-2:six1/2-3:rxra	35
321	dd_Smes_g4_110	484361	484704	344	*	k27ac_pooled_april21_peak_2970	10.1274	Intron (SMEST003706001.1/MSTRG.1930, intron 11 of 14)	14	480974	488524	7551	1	MSTRG.1930	MSTRG.1930.3	3387	14.1079	0.348216	-0.193121	-0.372959	0	0	0	0.421573	-0.159439	MERTK	MER proto-oncogene, tyrosine kinase [Source:HGNC Symbol;Acc:HGNC:7027]	MSTRG.21923:MSTRG.9638:MSTRG.10410:SMESG000022963.1:MSTRG.4288:MSTRG.4289:MSTRG.22163:MSTRG.16827:MSTRG.9571:MSTRG.624:MSTRG.11386:MSTRG.22087:MSTRG.10044:MSTRG.5025:MSTRG.20458:MSTRG.14008:MSTRG.19091:MSTRG.2484:MSTRG.1218:MSTRG.9193:MSTRG.5081:MSTRG.20466:MSTRG.17923:MSTRG.22990:MSTRG.17848:MSTRG.9911:MSTRG.4069:MSTRG.17209:MSTRG.1469:MSTRG.13692:MSTRG.5965:MSTRG.1897:MSTRG.18714:MSTRG.6954:MST…	barhl2-1:barhl2-2:bsx:barhl1:hinfp-1:hinfp-2:rest-1:zfp674:znf-1:znf91:znf333-1:znf652:zscan2-2:zscan2-6:rest-2:dll-1:coe:egr*-2:egr4-1:egr4-2:emx1:gli-1:gli-2:gli-3:isl-1:isl-2:lhx2-1:lhx2-4:lhx2-3:lhx1-1:lhx1-4:meis-1:meox:msx:smad1:smad9:myoD:neuroD-1:fer3l-3:nf-ya1:nf-ya2:nr2f1:nr4a-1:nr4a-2:onecut-1:onecut-2:onecut-3:onecut-5:hnf6:cux-2:pax2/5/8-1:pitx:Xfin:zfp-4:zbed-1:zf-5:a:zfp-7:rx:shox:…	46	MSTRG.10887:MSTRG.7998:MSTRG.23420:MSTRG.12684:MSTRG.19544:MSTRG.10604:MSTRG.11379:MSTRG.22994:MSTRG.4327:MSTRG.19528:MSTRG.2656:MSTRG.2731:MSTRG.23472:MSTRG.13758:MSTRG.11405:MSTRG.12700:MSTRG.8018:MSTRG.11935:MSTRG.23304:MSTRG.8862:MSTRG.5535:MSTRG.17691:MSTRG.16138:MSTRG.3741:MSTRG.7287:MSTRG.4403:MSTRG.19305:MSTRG.7792:MSTRG.6856:MSTRG.12851:MSTRG.17155:SMESG000049967.1:MSTRG.10215:MSTRG.1017…	arnt-1:Lox5a:Lox5b:nkx5-3:creb3l-1:ets-3:ets-5:fli-2:fli-3:ets-1:etv4:elf1:fli-1:foxN(P):gcm-2:gata456-1:gata456-2:gata456-4:fezf2:gfi1:zfp541:zfhx3:prdm14:hesl-3:nkx6-2:hnf4:hesl-2:nkx3-1:nkx5-2:nerfin2-1:atmin:zscan2-4:cbt:klf-3:klf-1:lhx3:sall4:fir1:zfp-8:zfp236-1:zfp354:znf101:znf425:znf660:lmpt-3:nkx6-1:otx-1:otx-2:pax6-1:pax6-2:pou4-1:pou4-2:rfx3:rfx4:rfx7:ctcf:zfp-10:zfp677:scratch-like:sn…	53
322	dd_Smes_g4_110	516748	517256	509	*	k27ac_pooled_april21_peak_2974	5.88684	Distal Intergenic	14	496298	496962	665	1	SMESG000003707.1	SMEST003707001.1	20450	0.0724434	0.767568	-0.399431	-0.413752	0	0	0			-	-	-	-	0	MSTRG.7896:MSTRG.7998:MSTRG.23420:MSTRG.10410:SMESG000022963.1:MSTRG.19544:MSTRG.4288:MSTRG.4289:MSTRG.22163:MSTRG.16827:MSTRG.9571:MSTRG.624:MSTRG.11386:MSTRG.22087:MSTRG.10044:MSTRG.5025:MSTRG.2221:MSTRG.2484:MSTRG.1218:MSTRG.9193:MSTRG.9479:MSTRG.5625:MSTRG.2171:MSTRG.22528:MSTRG.19546:MSTRG.7741:MSTRG.3929:MSTRG.6819:MSTRG.11814:MSTRG.10087:MSTRG.20250:MSTRG.13758:MSTRG.18815:MSTRG.21195:SMES…	znf596:Lox5a:Lox5b:bsx:barhl1:creb3l-1:hinfp-1:hinfp-2:rest-1:zfp674:znf-1:znf91:znf333-1:znf652:zscan2-2:zscan2-6:dbx:egr*-2:egr4-1:egr4-2:foxA(P):foxC1:foxC2:foxD1:foxD2:foxD3:foxG:foxL1:foxO:pou-p1:foxP:foxN(P):foxQ/D:foxJ1-1:foxJ1-2:foxJ1-3:foxJ1-4:foxJ1-5:foxN2/3-1:foxN2/3-2:foxN2/3-3:foxK1:foxK2:foxK3:gli-3:gata456-1:gata456-2:gata456-4:prdm14:hesl-3:nkx6-2:Hox4b:hesl-2:nerfin2-1:isl-1:isl-…	71
323	dd_Smes_g4_110	1145388	1146388	1001	*	k27ac_pooled_april21_peak_2995	6.67858	Distal Intergenic	14	1158496	1159119	624	2	MSTRG.1950	SMEST003538001.1	12731	3739.35	0.28289	-0.135607	0.0083982	0	0	0	0.710305	-0.0676851	ALDH1L2	aldehyde dehydrogenase 1 family member L2 [Source:HGNC Symbol;Acc:HGNC:26777]	MSTRG.10410:MSTRG.20466:MSTRG.17923:MSTRG.17155:SMESG000049967.1:MSTRG.1469:MSTRG.13692:MSTRG.5965:MSTRG.6954:MSTRG.4208:MSTRG.16892:MSTRG.14130:MSTRG.3824:MSTRG.18823:MSTRG.8332:MSTRG.3166:MSTRG.7853:MSTRG.4161:MSTRG.1496:MSTRG.16685:MSTRG.1504:MSTRG.2111:MSTRG.14619:MSTRG.5418:MSTRG.15672:MSTRG.6725:MSTRG.5260:MSTRG.23512:MSTRG.9977:MSTRG.10612:MSTRG.14638:MSTRG.396:MSTRG.15425:MSTRG.19918:MSTR…	bsx:gli-1:gli-2:atmin:zscan2-4:lhx2-3:lhx1-1:lhx1-4:msx:smad1:smad9:nf-ya1:nf-ya2:nr4a-1:nr4a-2:onecut-1:onecut-2:onecut-3:onecut-5:hnf6:cux-2:pax2/5/8-1:zfp-7:rfx3:rfx4:rfx7:ctcf:zfp-10:zfp677:rx:shox:klf-2:sp6-9:sp8:ptf-5:uncx:yy2:zbed8:znf333-2:znf207:znf143:prdm1-1:zfp-3:zfp878:zbed1:zscan2-7:irx-1:irx6-1:irx6-2:irx6-3:hb-1:hb-2:osr-1:osr-2:rxra	31	MSTRG.7896:MSTRG.12684:MSTRG.4288:MSTRG.4289:MSTRG.22163:MSTRG.16827:MSTRG.9571:MSTRG.624:MSTRG.11386:MSTRG.22087:MSTRG.10044:MSTRG.5025:MSTRG.20458:MSTRG.2221:MSTRG.19091:MSTRG.2484:MSTRG.1218:MSTRG.9193:MSTRG.9479:MSTRG.22295:MSTRG.19765:MSTRG.11405:MSTRG.22990:MSTRG.13843:MSTRG.12851:MSTRG.10215:MSTRG.10177:MSTRG.15979:MSTRG.2271:MSTRG.7427:MSTRG.1897:MSTRG.586:MSTRG.18649:MSTRG.3565:MSTRG.704…	znf596:nkx5-3:hinfp-1:hinfp-2:rest-1:zfp674:znf-1:znf91:znf333-1:znf652:zscan2-2:zscan2-6:rest-2:dbx:coe:egr*-2:egr4-1:egr4-2:foxA(P):foxF1 :foxF2:gcm-2:gli-3:Hox4b:nerfin2-1:cbt:klf-3:klf-1:egr-2:lhx1-3:meis-1:pdp1:Pbx-4:Xfin:zfp-4:zbed-1:zf-5:kdm5b:sp5:srebp:zic-1:zic-2:egr-1:ovo-1:prdm13:gl:znf341:alx4:egr4-3:Pbx-1:Pbx-2:gcm-1:arx:meis-2:onecut-4:ovo-2:ovo-3:tead1:nkx1:nkx1-1:nkx1-2	37
324	dd_Smes_g4_110	1264273	1264747	475	*	k27ac_pooled_april21_peak_3001	6.22046	Promoter	14	1264137	1265734	1598	1	MSTRG.1952	SMEST003548001.1	136	1.30019	0.160764	-0.223304	-0.228884	0	0	0	0.981577	0.021227	CALM3	calmodulin 3 [Source:HGNC Symbol;Acc:HGNC:1449]	-	-	0	MSTRG.10887:MSTRG.9597:MSTRG.7998:MSTRG.23420:MSTRG.21923:MSTRG.9638:SMESG000022963.1:MSTRG.1217:MSTRG.4483:MSTRG.17936:MSTRG.5414:MSTRG.12684:MSTRG.19544:MSTRG.4288:MSTRG.4289:MSTRG.22163:MSTRG.16827:MSTRG.9571:MSTRG.624:MSTRG.11386:MSTRG.22087:MSTRG.10044:MSTRG.5025:MSTRG.20458:MSTRG.2484:MSTRG.1218:MSTRG.9193:MSTRG.10604:MSTRG.2656:MSTRG.2731:MSTRG.5625:MSTRG.2171:MSTRG.22528:MSTRG.19546:MSTRG…	arnt-1:pax3/7-1:Lox5a:Lox5b:barhl2-1:barhl2-2:barhl1:egr-5:znf362:zf-4:tlx-1:nkx5-3:creb3l-1:hinfp-1:hinfp-2:rest-1:zfp674:znf-1:znf91:znf333-1:znf652:zscan2-2:zscan2-6:rest-2:egr*-2:egr4-1:egr4-2:ets-3:etv4:elf1:foxC1:foxC2:foxD1:foxD2:foxD3:foxG:foxL1:foxO:foxQ/D:foxJ1-1:foxJ1-2:foxJ1-3:foxJ1-4:foxJ1-5:foxN2/3-1:foxN2/3-2:foxN2/3-3:gata123:gata456-3:gli-1:gli-2:gli-3:gata456-1:gata456-2:gata456…	98
325	dd_Smes_g4_110	1449894	1450429	536	*	k27ac_pooled_april21_peak_3017	6.19022	Promoter	14	1449803	1450479	677	2	MSTRG.1962	MSTRG.1962.2	50	7.57262	0.205969	-0.377267	-0.611055	0	0	0	0.073358	-0.389245	PTCH1	patched 1 [Source:HGNC Symbol;Acc:HGNC:9585]	-	-	0	MSTRG.6974:MSTRG.19544:MSTRG.4288:MSTRG.4289:MSTRG.22163:MSTRG.16827:MSTRG.9571:MSTRG.624:MSTRG.11386:MSTRG.22087:MSTRG.10044:MSTRG.5025:MSTRG.20458:MSTRG.22126:SMESG000049970.1:SMESG000031904.1:MSTRG.221:MSTRG.2484:MSTRG.1218:MSTRG.9193:MSTRG.19528:MSTRG.23472:MSTRG.5625:MSTRG.2171:MSTRG.22295:MSTRG.19765:MSTRG.10087:MSTRG.20250:MSTRG.18815:MSTRG.21195:SMESG000072873.1:MSTRG.19883:MSTRG.3843:MST…	alx3-2:creb3l-1:hinfp-1:hinfp-2:rest-1:zfp674:znf-1:znf91:znf333-1:znf652:zscan2-2:zscan2-6:rest-2:zfp560-1:zscan2-5:zscan2-8:zf-6:egr*-2:egr4-1:egr4-2:ets-1:fli-1:foxC1:foxC2:foxF1 :foxF2:pou-p1:foxP:foxQ/D:foxJ1-1:foxJ1-2:foxJ1-3:foxJ1-4:foxJ1-5:foxN2/3-1:foxN2/3-2:foxN2/3-3:foxK1:foxK2:foxK3:gcm-2:gli-1:gli-2:gli-3:hesl-2:nkx3-1:nkx5-2:Hox3a:atmin:zscan2-4:cbt:lhx1-3:Mef2-1:gtf2a1:Mef2-2:meis-…	61
[truncated: 4,000 more rows]
