# Supplementary material for: Identification of putative enhancer-like elements predicts regulatory networks active in planarian adult stem cells
Source: eLife. 2022 Aug 23;11:e79675. doi: 10.7554/eLife.79675 (PMC9522251; doi:10.7554/eLife.79675)
Supplement: Supplementary file 3. [file elife-79675-supp3.xlsx]

## Sheet: Sheet1
	TFBS_chr	TFBS_start	TFBS_end	TFBS_name	TFBS_score	TFBS_strand	peak_chr	peak_start	peak_end	X1_score	X1_bound	GeneID	TF name
15	dd_Smes_g4_1	3643178	3643186	ARNTHIF1A_MA0259.1	8.69953	+	dd_Smes_g4_1	3641527	3643528	8.9886	1	MSTRG.10887	arnt-1
19	dd_Smes_g4_1	4704886	4704894	ARNTHIF1A_MA0259.1	8.13276	+	dd_Smes_g4_1	4703314	4708303	8.21769	1	MSTRG.10887	arnt-1
20	dd_Smes_g4_1	5109549	5109557	ARNTHIF1A_MA0259.1	8.69953	-	dd_Smes_g4_1	5109337	5111338	8.75516	1	MSTRG.10887	arnt-1
21	dd_Smes_g4_1	5109572	5109580	ARNTHIF1A_MA0259.1	7.99208	+	dd_Smes_g4_1	5109337	5111338	9.20798	1	MSTRG.10887	arnt-1
22	dd_Smes_g4_1	5109802	5109810	ARNTHIF1A_MA0259.1	10.3369	+	dd_Smes_g4_1	5109337	5111338	7.77506	1	MSTRG.10887	arnt-1
24	dd_Smes_g4_1	5122586	5122594	ARNTHIF1A_MA0259.1	10.7983	+	dd_Smes_g4_1	5121481	5123482	8.1374	1	MSTRG.10887	arnt-1
31	dd_Smes_g4_1	8172871	8172879	ARNTHIF1A_MA0259.1	8.36483	-	dd_Smes_g4_1	8170328	8172970	8.49376	1	MSTRG.10887	arnt-1
50	dd_Smes_g4_1	15276689	15276697	ARNTHIF1A_MA0259.1	7.99208	-	dd_Smes_g4_1	15275249	15278606	9.05646	1	MSTRG.10887	arnt-1
59	dd_Smes_g4_10	965087	965095	ARNTHIF1A_MA0259.1	9.13812	+	dd_Smes_g4_10	963611	966656	10.6189	1	MSTRG.10887	arnt-1
90	dd_Smes_g4_103	397245	397253	ARNTHIF1A_MA0259.1	7.99208	+	dd_Smes_g4_103	395679	397680	7.40762	1	MSTRG.10887	arnt-1
107	dd_Smes_g4_108	246769	246777	ARNTHIF1A_MA0259.1	7.81918	+	dd_Smes_g4_108	246534	251764	9.82687	1	MSTRG.10887	arnt-1
122	dd_Smes_g4_109	2110369	2110377	ARNTHIF1A_MA0259.1	8.00498	+	dd_Smes_g4_109	2109339	2111340	8.50055	1	MSTRG.10887	arnt-1
123	dd_Smes_g4_109	2110591	2110599	ARNTHIF1A_MA0259.1	7.90349	-	dd_Smes_g4_109	2109339	2111340	7.90162	1	MSTRG.10887	arnt-1
139	dd_Smes_g4_11	5697773	5697781	ARNTHIF1A_MA0259.1	7.99208	+	dd_Smes_g4_11	5694036	5697950	8.23081	1	MSTRG.10887	arnt-1
148	dd_Smes_g4_110	193845	193853	ARNTHIF1A_MA0259.1	8.67956	-	dd_Smes_g4_110	193322	195323	13.6132	1	MSTRG.10887	arnt-1
153	dd_Smes_g4_110	1486690	1486698	ARNTHIF1A_MA0259.1	7.99208	+	dd_Smes_g4_110	1486216	1489832	9.82184	1	MSTRG.10887	arnt-1
166	dd_Smes_g4_111	1403824	1403832	ARNTHIF1A_MA0259.1	9.23961	-	dd_Smes_g4_111	1402775	1405020	8.33442	1	MSTRG.10887	arnt-1
167	dd_Smes_g4_111	1403864	1403872	ARNTHIF1A_MA0259.1	8.69953	+	dd_Smes_g4_111	1402775	1405020	8.53179	1	MSTRG.10887	arnt-1
169	dd_Smes_g4_112	936134	936142	ARNTHIF1A_MA0259.1	7.75851	-	dd_Smes_g4_112	935661	938503	9.96311	1	MSTRG.10887	arnt-1
179	dd_Smes_g4_114	1178495	1178503	ARNTHIF1A_MA0259.1	9.49393	-	dd_Smes_g4_114	1176714	1179849	7.90044	1	MSTRG.10887	arnt-1
183	dd_Smes_g4_115	991427	991435	ARNTHIF1A_MA0259.1	8.83509	+	dd_Smes_g4_115	990187	992188	8.28047	1	MSTRG.10887	arnt-1
233	dd_Smes_g4_12	8178709	8178717	ARNTHIF1A_MA0259.1	8.30049	+	dd_Smes_g4_12	8177820	8179821	9.09869	1	MSTRG.10887	arnt-1
241	dd_Smes_g4_125	1047894	1047902	ARNTHIF1A_MA0259.1	8.06181	-	dd_Smes_g4_125	1046158	1050405	11.9476	1	MSTRG.10887	arnt-1
256	dd_Smes_g4_128	1408233	1408241	ARNTHIF1A_MA0259.1	7.81918	+	dd_Smes_g4_128	1406634	1411272	7.69739	1	MSTRG.10887	arnt-1
257	dd_Smes_g4_128	1408509	1408517	ARNTHIF1A_MA0259.1	9.13812	-	dd_Smes_g4_128	1406634	1411272	10.5712	1	MSTRG.10887	arnt-1
292	dd_Smes_g4_13	6624409	6624417	ARNTHIF1A_MA0259.1	9.13812	+	dd_Smes_g4_13	6623512	6625513	7.87586	1	MSTRG.10887	arnt-1
301	dd_Smes_g4_13	7892537	7892545	ARNTHIF1A_MA0259.1	10.2409	+	dd_Smes_g4_13	7891231	7893311	7.48656	1	MSTRG.10887	arnt-1
305	dd_Smes_g4_131	651014	651022	ARNTHIF1A_MA0259.1	9.49393	+	dd_Smes_g4_131	650818	652819	13.7166	1	MSTRG.10887	arnt-1
314	dd_Smes_g4_131	1686512	1686520	ARNTHIF1A_MA0259.1	8.30049	+	dd_Smes_g4_131	1684914	1687289	11.53	1	MSTRG.10887	arnt-1
320	dd_Smes_g4_133	485601	485609	ARNTHIF1A_MA0259.1	8.55482	+	dd_Smes_g4_133	485507	487508	9.18935	1	MSTRG.10887	arnt-1
352	dd_Smes_g4_134	953859	953867	ARNTHIF1A_MA0259.1	8.00498	-	dd_Smes_g4_134	952846	954847	7.84271	1	MSTRG.10887	arnt-1
360	dd_Smes_g4_134	1177986	1177994	ARNTHIF1A_MA0259.1	8.38709	+	dd_Smes_g4_134	1176085	1180208	7.42789	1	MSTRG.10887	arnt-1
363	dd_Smes_g4_134	1184025	1184033	ARNTHIF1A_MA0259.1	8.85784	+	dd_Smes_g4_134	1182978	1184979	8.41373	1	MSTRG.10887	arnt-1
371	dd_Smes_g4_134	1417853	1417861	ARNTHIF1A_MA0259.1	8.3965	-	dd_Smes_g4_134	1415842	1418595	9.29239	1	MSTRG.10887	arnt-1
379	dd_Smes_g4_134	1642981	1642989	ARNTHIF1A_MA0259.1	8.14218	-	dd_Smes_g4_134	1641685	1643747	7.8867	1	MSTRG.10887	arnt-1
384	dd_Smes_g4_137	1011482	1011490	ARNTHIF1A_MA0259.1	9.40534	-	dd_Smes_g4_137	1009361	1012065	7.83089	1	MSTRG.10887	arnt-1
390	dd_Smes_g4_138	1327006	1327014	ARNTHIF1A_MA0259.1	8.30049	+	dd_Smes_g4_138	1325790	1327791	8.14395	1	MSTRG.10887	arnt-1
405	dd_Smes_g4_14	2829938	2829946	ARNTHIF1A_MA0259.1	7.75851	-	dd_Smes_g4_14	2829773	2831774	7.41982	1	MSTRG.10887	arnt-1
409	dd_Smes_g4_14	3145725	3145733	ARNTHIF1A_MA0259.1	9.23961	+	dd_Smes_g4_14	3144647	3149033	7.36247	1	MSTRG.10887	arnt-1
430	dd_Smes_g4_14	5799322	5799330	ARNTHIF1A_MA0259.1	8.06181	-	dd_Smes_g4_14	5796354	5800763	7.4061	1	MSTRG.10887	arnt-1
436	dd_Smes_g4_14	7222934	7222942	ARNTHIF1A_MA0259.1	9.29643	+	dd_Smes_g4_14	7222479	7224480	9.86138	1	MSTRG.10887	arnt-1
488	dd_Smes_g4_15	3900135	3900143	ARNTHIF1A_MA0259.1	9.49393	-	dd_Smes_g4_15	3898291	3900292	7.90441	1	MSTRG.10887	arnt-1
489	dd_Smes_g4_15	3900184	3900192	ARNTHIF1A_MA0259.1	7.67823	-	dd_Smes_g4_15	3898291	3900292	8.44506	1	MSTRG.10887	arnt-1
515	dd_Smes_g4_15	6850847	6850855	ARNTHIF1A_MA0259.1	7.90349	-	dd_Smes_g4_15	6849827	6851828	7.43528	1	MSTRG.10887	arnt-1
523	dd_Smes_g4_15	7103668	7103676	ARNTHIF1A_MA0259.1	8.99341	+	dd_Smes_g4_15	7101015	7105970	8.70234	1	MSTRG.10887	arnt-1
529	dd_Smes_g4_15	7335134	7335142	ARNTHIF1A_MA0259.1	7.99208	+	dd_Smes_g4_15	7334382	7339739	8.56402	1	MSTRG.10887	arnt-1
541	dd_Smes_g4_15	7630253	7630261	ARNTHIF1A_MA0259.1	9.77959	-	dd_Smes_g4_15	7628502	7630503	7.7713	1	MSTRG.10887	arnt-1
544	dd_Smes_g4_15	7792030	7792038	ARNTHIF1A_MA0259.1	8.93658	+	dd_Smes_g4_15	7791332	7793333	9.48241	1	MSTRG.10887	arnt-1
558	dd_Smes_g4_155	292656	292664	ARNTHIF1A_MA0259.1	9.86668	-	dd_Smes_g4_155	292592	294593	7.50069	1	MSTRG.10887	arnt-1
575	dd_Smes_g4_157	662450	662458	ARNTHIF1A_MA0259.1	9.13812	-	dd_Smes_g4_157	661676	663677	8.29088	1	MSTRG.10887	arnt-1
576	dd_Smes_g4_157	662666	662674	ARNTHIF1A_MA0259.1	8.00498	-	dd_Smes_g4_157	661676	663677	8.38747	1	MSTRG.10887	arnt-1
582	dd_Smes_g4_157	892626	892634	ARNTHIF1A_MA0259.1	8.93658	+	dd_Smes_g4_157	890517	893056	8.67742	1	MSTRG.10887	arnt-1
585	dd_Smes_g4_157	1035515	1035523	ARNTHIF1A_MA0259.1	8.13276	+	dd_Smes_g4_157	1034475	1036476	17.2885	1	MSTRG.10887	arnt-1
611	dd_Smes_g4_16	3345971	3345979	ARNTHIF1A_MA0259.1	9.56366	+	dd_Smes_g4_16	3345672	3348469	7.58838	1	MSTRG.10887	arnt-1
642	dd_Smes_g4_17	1481615	1481623	ARNTHIF1A_MA0259.1	9.49393	-	dd_Smes_g4_17	1480754	1482755	12.0515	1	MSTRG.10887	arnt-1
665	dd_Smes_g4_172	208680	208688	ARNTHIF1A_MA0259.1	8.69953	-	dd_Smes_g4_172	208289	210290	8.85985	1	MSTRG.10887	arnt-1
675	dd_Smes_g4_172	824224	824232	ARNTHIF1A_MA0259.1	8.21822	+	dd_Smes_g4_172	823223	825387	7.40483	1	MSTRG.10887	arnt-1
676	dd_Smes_g4_172	824383	824391	ARNTHIF1A_MA0259.1	9.93791	-	dd_Smes_g4_172	823223	825387	8.60769	1	MSTRG.10887	arnt-1
677	dd_Smes_g4_172	824444	824452	ARNTHIF1A_MA0259.1	8.00498	+	dd_Smes_g4_172	823223	825387	7.8242	1	MSTRG.10887	arnt-1
688	dd_Smes_g4_172	893725	893733	ARNTHIF1A_MA0259.1	8.20652	-	dd_Smes_g4_172	892832	895000	7.56514	1	MSTRG.10887	arnt-1
690	dd_Smes_g4_172	894217	894225	ARNTHIF1A_MA0259.1	10.2409	+	dd_Smes_g4_172	892832	895000	9.08073	1	MSTRG.10887	arnt-1
695	dd_Smes_g4_172	978142	978150	ARNTHIF1A_MA0259.1	7.83915	-	dd_Smes_g4_172	976712	979136	8.70558	1	MSTRG.10887	arnt-1
699	dd_Smes_g4_172	1149102	1149110	ARNTHIF1A_MA0259.1	8.69953	-	dd_Smes_g4_172	1145202	1151492	7.79611	1	MSTRG.10887	arnt-1
700	dd_Smes_g4_172	1151296	1151304	ARNTHIF1A_MA0259.1	8.11812	+	dd_Smes_g4_172	1145202	1151492	8.19417	1	MSTRG.10887	arnt-1
753	dd_Smes_g4_18	5431518	5431526	ARNTHIF1A_MA0259.1	9.13812	-	dd_Smes_g4_18	5427546	5432583	7.42552	1	MSTRG.10887	arnt-1
759	dd_Smes_g4_18	6464912	6464920	ARNTHIF1A_MA0259.1	7.67823	-	dd_Smes_g4_18	6463707	6466388	8.49173	1	MSTRG.10887	arnt-1
760	dd_Smes_g4_18	6465103	6465111	ARNTHIF1A_MA0259.1	8.00498	-	dd_Smes_g4_18	6463707	6466388	7.78215	1	MSTRG.10887	arnt-1
761	dd_Smes_g4_18	6465118	6465126	ARNTHIF1A_MA0259.1	7.99208	-	dd_Smes_g4_18	6463707	6466388	7.88614	1	MSTRG.10887	arnt-1
774	dd_Smes_g4_18	7214485	7214493	ARNTHIF1A_MA0259.1	8.11812	+	dd_Smes_g4_18	7211532	7215371	11.9922	1	MSTRG.10887	arnt-1
788	dd_Smes_g4_189	365198	365206	ARNTHIF1A_MA0259.1	9.49393	-	dd_Smes_g4_189	362686	365596	7.67725	1	MSTRG.10887	arnt-1
795	dd_Smes_g4_189	872287	872295	ARNTHIF1A_MA0259.1	8.11812	-	dd_Smes_g4_189	871160	874452	7.47102	1	MSTRG.10887	arnt-1
796	dd_Smes_g4_189	873831	873839	ARNTHIF1A_MA0259.1	8.84799	-	dd_Smes_g4_189	871160	874452	8.66984	1	MSTRG.10887	arnt-1
829	dd_Smes_g4_195	523354	523362	ARNTHIF1A_MA0259.1	9.49393	-	dd_Smes_g4_195	522359	524360	7.62493	1	MSTRG.10887	arnt-1
913	dd_Smes_g4_205	415737	415745	ARNTHIF1A_MA0259.1	9.79696	+	dd_Smes_g4_205	415341	417342	9.96086	1	MSTRG.10887	arnt-1
936	dd_Smes_g4_21	6274270	6274278	ARNTHIF1A_MA0259.1	8.85784	+	dd_Smes_g4_21	6273384	6275385	7.49777	1	MSTRG.10887	arnt-1
940	dd_Smes_g4_210	511718	511726	ARNTHIF1A_MA0259.1	8.3965	-	dd_Smes_g4_210	509708	512988	8.1463	1	MSTRG.10887	arnt-1
943	dd_Smes_g4_213	237029	237037	ARNTHIF1A_MA0259.1	8.93658	-	dd_Smes_g4_213	236067	238068	8.09733	1	MSTRG.10887	arnt-1
945	dd_Smes_g4_213	535357	535365	ARNTHIF1A_MA0259.1	7.67823	-	dd_Smes_g4_213	534340	536341	7.45351	1	MSTRG.10887	arnt-1
958	dd_Smes_g4_218	456006	456014	ARNTHIF1A_MA0259.1	8.99341	-	dd_Smes_g4_218	454857	456913	8.21431	1	MSTRG.10887	arnt-1
964	dd_Smes_g4_219	289371	289379	ARNTHIF1A_MA0259.1	8.21822	-	dd_Smes_g4_219	288222	290738	7.38265	1	MSTRG.10887	arnt-1
1023	dd_Smes_g4_231	402750	402758	ARNTHIF1A_MA0259.1	9.93791	-	dd_Smes_g4_231	401888	403889	9.25174	1	MSTRG.10887	arnt-1
1025	dd_Smes_g4_231	407945	407953	ARNTHIF1A_MA0259.1	9.0063	-	dd_Smes_g4_231	406859	411405	7.80509	1	MSTRG.10887	arnt-1
1027	dd_Smes_g4_231	447791	447799	ARNTHIF1A_MA0259.1	8.21822	-	dd_Smes_g4_231	447492	449493	11.1653	1	MSTRG.10887	arnt-1
1033	dd_Smes_g4_232	58947	58955	ARNTHIF1A_MA0259.1	7.81918	-	dd_Smes_g4_232	57443	59918	9.5581	1	MSTRG.10887	arnt-1
1034	dd_Smes_g4_232	59025	59033	ARNTHIF1A_MA0259.1	8.20652	-	dd_Smes_g4_232	57443	59918	9.99895	1	MSTRG.10887	arnt-1
1039	dd_Smes_g4_232	80691	80699	ARNTHIF1A_MA0259.1	10.64	-	dd_Smes_g4_232	79545	81851	8.23376	1	MSTRG.10887	arnt-1
1040	dd_Smes_g4_232	80718	80726	ARNTHIF1A_MA0259.1	9.15101	-	dd_Smes_g4_232	79545	81851	8.16542	1	MSTRG.10887	arnt-1
1041	dd_Smes_g4_232	350197	350205	ARNTHIF1A_MA0259.1	10.3369	-	dd_Smes_g4_232	348897	352802	8.43024	1	MSTRG.10887	arnt-1
1042	dd_Smes_g4_232	354841	354849	ARNTHIF1A_MA0259.1	8.83509	+	dd_Smes_g4_232	354125	356126	16.9777	1	MSTRG.10887	arnt-1
1047	dd_Smes_g4_232	414915	414923	ARNTHIF1A_MA0259.1	7.82974	+	dd_Smes_g4_232	414171	416521	8.0413	1	MSTRG.10887	arnt-1
1048	dd_Smes_g4_232	415131	415139	ARNTHIF1A_MA0259.1	8.29511	+	dd_Smes_g4_232	414171	416521	13.2711	1	MSTRG.10887	arnt-1
1049	dd_Smes_g4_232	418277	418285	ARNTHIF1A_MA0259.1	10.3369	-	dd_Smes_g4_232	417051	419052	13.5321	1	MSTRG.10887	arnt-1
1053	dd_Smes_g4_232	594947	594955	ARNTHIF1A_MA0259.1	7.67823	-	dd_Smes_g4_232	594545	596546	10.038	1	MSTRG.10887	arnt-1
1054	dd_Smes_g4_232	595010	595018	ARNTHIF1A_MA0259.1	7.67823	-	dd_Smes_g4_232	594545	596546	15.2098	1	MSTRG.10887	arnt-1
1055	dd_Smes_g4_232	595031	595039	ARNTHIF1A_MA0259.1	7.67823	-	dd_Smes_g4_232	594545	596546	14.1736	1	MSTRG.10887	arnt-1
1056	dd_Smes_g4_232	595053	595061	ARNTHIF1A_MA0259.1	7.67823	-	dd_Smes_g4_232	594545	596546	12.1097	1	MSTRG.10887	arnt-1
1061	dd_Smes_g4_239	342712	342720	ARNTHIF1A_MA0259.1	8.21822	-	dd_Smes_g4_239	342608	345027	9.80555	1	MSTRG.10887	arnt-1
1073	dd_Smes_g4_24	3554155	3554163	ARNTHIF1A_MA0259.1	8.00498	+	dd_Smes_g4_24	3552980	3554981	9.36064	1	MSTRG.10887	arnt-1
1082	dd_Smes_g4_244	60451	60459	ARNTHIF1A_MA0259.1	7.67823	+	dd_Smes_g4_244	59512	61513	8.04029	1	MSTRG.10887	arnt-1
1085	dd_Smes_g4_25	435222	435230	ARNTHIF1A_MA0259.1	9.13812	+	dd_Smes_g4_25	433822	435823	8.32443	1	MSTRG.10887	arnt-1
1086	dd_Smes_g4_25	435423	435431	ARNTHIF1A_MA0259.1	7.99747	-	dd_Smes_g4_25	433822	435823	8.39755	1	MSTRG.10887	arnt-1
1113	dd_Smes_g4_257	485564	485572	ARNTHIF1A_MA0259.1	8.99341	+	dd_Smes_g4_257	484289	486290	10.5716	1	MSTRG.10887	arnt-1
1130	dd_Smes_g4_265	38231	38239	ARNTHIF1A_MA0259.1	7.67823	-	dd_Smes_g4_265	36093	43765	10.0092	1	MSTRG.10887	arnt-1
1135	dd_Smes_g4_265	58887	58895	ARNTHIF1A_MA0259.1	8.21822	+	dd_Smes_g4_265	57533	59534	8.87737	1	MSTRG.10887	arnt-1
1158	dd_Smes_g4_265	489598	489606	ARNTHIF1A_MA0259.1	7.99208	+	dd_Smes_g4_265	488380	490816	8.16499	1	MSTRG.10887	arnt-1
1161	dd_Smes_g4_265	498960	498968	ARNTHIF1A_MA0259.1	10.3369	-	dd_Smes_g4_265	494677	498996	10.0525	1	MSTRG.10887	arnt-1
1176	dd_Smes_g4_267	504122	504130	ARNTHIF1A_MA0259.1	10.64	-	dd_Smes_g4_267	504070	506197	8.87817	1	MSTRG.10887	arnt-1
1177	dd_Smes_g4_267	504251	504259	ARNTHIF1A_MA0259.1	9.13812	+	dd_Smes_g4_267	504070	506197	11.1783	1	MSTRG.10887	arnt-1
1215	dd_Smes_g4_29	2301909	2301917	ARNTHIF1A_MA0259.1	9.0063	-	dd_Smes_g4_29	2301154	2303155	8.38269	1	MSTRG.10887	arnt-1
1225	dd_Smes_g4_290	305396	305404	ARNTHIF1A_MA0259.1	7.75851	-	dd_Smes_g4_290	303900	305901	7.52056	1	MSTRG.10887	arnt-1
1228	dd_Smes_g4_297	109198	109206	ARNTHIF1A_MA0259.1	9.23961	+	dd_Smes_g4_297	108282	110401	8.0954	1	MSTRG.10887	arnt-1
1229	dd_Smes_g4_297	109825	109833	ARNTHIF1A_MA0259.1	9.49393	+	dd_Smes_g4_297	108282	110401	7.75871	1	MSTRG.10887	arnt-1
1243	dd_Smes_g4_297	327518	327526	ARNTHIF1A_MA0259.1	10.3369	+	dd_Smes_g4_297	326940	328941	9.44484	1	MSTRG.10887	arnt-1
1244	dd_Smes_g4_297	327651	327659	ARNTHIF1A_MA0259.1	8.83509	+	dd_Smes_g4_297	326940	328941	10.9816	1	MSTRG.10887	arnt-1
1258	dd_Smes_g4_3	2503515	2503523	ARNTHIF1A_MA0259.1	8.21822	+	dd_Smes_g4_3	2502571	2504572	7.37075	1	MSTRG.10887	arnt-1
1294	dd_Smes_g4_31	2467155	2467163	ARNTHIF1A_MA0259.1	7.67823	-	dd_Smes_g4_31	2465322	2467323	18.2862	1	MSTRG.10887	arnt-1
1330	dd_Smes_g4_35	1056123	1056131	ARNTHIF1A_MA0259.1	8.14218	+	dd_Smes_g4_35	1054281	1058123	9.49636	1	MSTRG.10887	arnt-1
1345	dd_Smes_g4_36	2816299	2816307	ARNTHIF1A_MA0259.1	9.49393	-	dd_Smes_g4_36	2815382	2818020	8.40797	1	MSTRG.10887	arnt-1
1348	dd_Smes_g4_36	3019599	3019607	ARNTHIF1A_MA0259.1	7.67823	+	dd_Smes_g4_36	3017952	3019953	12.7966	1	MSTRG.10887	arnt-1
1382	dd_Smes_g4_37	3603028	3603036	ARNTHIF1A_MA0259.1	8.93658	+	dd_Smes_g4_37	3602214	3604481	9.60452	1	MSTRG.10887	arnt-1
1383	dd_Smes_g4_37	3603061	3603069	ARNTHIF1A_MA0259.1	8.11812	+	dd_Smes_g4_37	3602214	3604481	8.44404	1	MSTRG.10887	arnt-1
1384	dd_Smes_g4_37	3603087	3603095	ARNTHIF1A_MA0259.1	8.37653	-	dd_Smes_g4_37	3602214	3604481	9.49208	1	MSTRG.10887	arnt-1
1407	dd_Smes_g4_38	4513196	4513204	ARNTHIF1A_MA0259.1	8.00498	-	dd_Smes_g4_38	4512448	4515216	8.09924	1	MSTRG.10887	arnt-1
1408	dd_Smes_g4_38	4513697	4513705	ARNTHIF1A_MA0259.1	8.21822	-	dd_Smes_g4_38	4512448	4515216	11.2363	1	MSTRG.10887	arnt-1
1468	dd_Smes_g4_42	1420058	1420066	ARNTHIF1A_MA0259.1	8.00498	+	dd_Smes_g4_42	1419144	1423518	7.84747	1	MSTRG.10887	arnt-1
1478	dd_Smes_g4_43	3581432	3581440	ARNTHIF1A_MA0259.1	8.29511	+	dd_Smes_g4_43	3580297	3582298	7.64211	1	MSTRG.10887	arnt-1
1491	dd_Smes_g4_45	2848373	2848381	ARNTHIF1A_MA0259.1	9.49393	-	dd_Smes_g4_45	2847392	2849393	8.43132	1	MSTRG.10887	arnt-1
1528	dd_Smes_g4_5	6325466	6325474	ARNTHIF1A_MA0259.1	8.85784	-	dd_Smes_g4_5	6323833	6325834	7.69872	1	MSTRG.10887	arnt-1
1532	dd_Smes_g4_5	9182904	9182912	ARNTHIF1A_MA0259.1	7.99208	-	dd_Smes_g4_5	9179200	9183143	9.15124	1	MSTRG.10887	arnt-1
1550	dd_Smes_g4_50	642888	642896	ARNTHIF1A_MA0259.1	9.86668	+	dd_Smes_g4_50	641648	643649	9.15813	1	MSTRG.10887	arnt-1
1552	dd_Smes_g4_50	1838820	1838828	ARNTHIF1A_MA0259.1	10.3369	-	dd_Smes_g4_50	1837170	1839171	7.89375	1	MSTRG.10887	arnt-1
1571	dd_Smes_g4_50	3572564	3572572	ARNTHIF1A_MA0259.1	7.81918	+	dd_Smes_g4_50	3570949	3573909	9.07401	1	MSTRG.10887	arnt-1
1572	dd_Smes_g4_50	3572576	3572584	ARNTHIF1A_MA0259.1	7.67823	+	dd_Smes_g4_50	3570949	3573909	9.07401	1	MSTRG.10887	arnt-1
1573	dd_Smes_g4_51	863432	863440	ARNTHIF1A_MA0259.1	9.13812	-	dd_Smes_g4_51	862420	864478	8.50248	1	MSTRG.10887	arnt-1
1576	dd_Smes_g4_51	1160195	1160203	ARNTHIF1A_MA0259.1	9.49393	+	dd_Smes_g4_51	1158779	1160780	8.15327	1	MSTRG.10887	arnt-1
1577	dd_Smes_g4_51	3086114	3086122	ARNTHIF1A_MA0259.1	10.0826	-	dd_Smes_g4_51	3084934	3086935	8.54518	1	MSTRG.10887	arnt-1
1623	dd_Smes_g4_57	1262392	1262400	ARNTHIF1A_MA0259.1	8.69953	+	dd_Smes_g4_57	1260604	1263302	7.40496	1	MSTRG.10887	arnt-1
1625	dd_Smes_g4_57	1759529	1759537	ARNTHIF1A_MA0259.1	8.85784	+	dd_Smes_g4_57	1759172	1761173	16.1915	1	MSTRG.10887	arnt-1
1626	dd_Smes_g4_57	1782231	1782239	ARNTHIF1A_MA0259.1	8.38709	-	dd_Smes_g4_57	1782010	1784011	11.0767	1	MSTRG.10887	arnt-1
1627	dd_Smes_g4_57	1782317	1782325	ARNTHIF1A_MA0259.1	8.21822	-	dd_Smes_g4_57	1782010	1784011	8.91421	1	MSTRG.10887	arnt-1
1628	dd_Smes_g4_57	1782372	1782380	ARNTHIF1A_MA0259.1	8.20652	-	dd_Smes_g4_57	1782010	1784011	9.1878	1	MSTRG.10887	arnt-1
1666	dd_Smes_g4_6	7365398	7365406	ARNTHIF1A_MA0259.1	8.308	+	dd_Smes_g4_6	7365039	7367040	9.40037	1	MSTRG.10887	arnt-1
1676	dd_Smes_g4_6	10493055	10493063	ARNTHIF1A_MA0259.1	8.20652	+	dd_Smes_g4_6	10492954	10496545	7.97534	1	MSTRG.10887	arnt-1
1679	dd_Smes_g4_60	519970	519978	ARNTHIF1A_MA0259.1	8.36483	+	dd_Smes_g4_60	518700	520701	7.37797	1	MSTRG.10887	arnt-1
1680	dd_Smes_g4_60	520315	520323	ARNTHIF1A_MA0259.1	9.29643	-	dd_Smes_g4_60	518700	520701	8.48553	1	MSTRG.10887	arnt-1
1693	dd_Smes_g4_60	3276710	3276718	ARNTHIF1A_MA0259.1	8.21822	+	dd_Smes_g4_60	3273252	3278168	8.60194	1	MSTRG.10887	arnt-1
1709	dd_Smes_g4_63	1228491	1228499	ARNTHIF1A_MA0259.1	8.3965	+	dd_Smes_g4_63	1226553	1229324	8.85385	1	MSTRG.10887	arnt-1
1716	dd_Smes_g4_64	1533278	1533286	ARNTHIF1A_MA0259.1	7.99208	-	dd_Smes_g4_64	1531804	1533805	7.79506	1	MSTRG.10887	arnt-1
1717	dd_Smes_g4_64	1533630	1533638	ARNTHIF1A_MA0259.1	10.4953	+	dd_Smes_g4_64	1531804	1533805	8.06115	1	MSTRG.10887	arnt-1
1773	dd_Smes_g4_7	4272848	4272856	ARNTHIF1A_MA0259.1	7.99208	-	dd_Smes_g4_7	4272764	4274765	8.27369	1	MSTRG.10887	arnt-1
1779	dd_Smes_g4_70	1050724	1050732	ARNTHIF1A_MA0259.1	8.3965	-	dd_Smes_g4_70	1050342	1052343	10.4548	1	MSTRG.10887	arnt-1
1788	dd_Smes_g4_72	2390558	2390566	ARNTHIF1A_MA0259.1	8.29511	-	dd_Smes_g4_72	2388898	2390899	8.65542	1	MSTRG.10887	arnt-1
1789	dd_Smes_g4_72	2390682	2390690	ARNTHIF1A_MA0259.1	8.3965	+	dd_Smes_g4_72	2388898	2390899	8.09335	1	MSTRG.10887	arnt-1
1792	dd_Smes_g4_73	727960	727968	ARNTHIF1A_MA0259.1	8.85784	-	dd_Smes_g4_73	726064	728176	7.38442	1	MSTRG.10887	arnt-1
1820	dd_Smes_g4_74	2877788	2877796	ARNTHIF1A_MA0259.1	7.99208	-	dd_Smes_g4_74	2876137	2878915	8.61586	1	MSTRG.10887	arnt-1
1832	dd_Smes_g4_76	2504943	2504951	ARNTHIF1A_MA0259.1	7.83915	+	dd_Smes_g4_76	2503447	2506090	7.69388	1	MSTRG.10887	arnt-1
1833	dd_Smes_g4_76	2507747	2507755	ARNTHIF1A_MA0259.1	8.67956	-	dd_Smes_g4_76	2506529	2509173	8.69578	1	MSTRG.10887	arnt-1
1837	dd_Smes_g4_76	2516093	2516101	ARNTHIF1A_MA0259.1	10.64	-	dd_Smes_g4_76	2514194	2518625	7.9923	1	MSTRG.10887	arnt-1
1845	dd_Smes_g4_76	2616364	2616372	ARNTHIF1A_MA0259.1	7.67823	-	dd_Smes_g4_76	2615494	2618812	8.83188	1	MSTRG.10887	arnt-1
1846	dd_Smes_g4_76	2616726	2616734	ARNTHIF1A_MA0259.1	10.3369	-	dd_Smes_g4_76	2615494	2618812	7.66576	1	MSTRG.10887	arnt-1
1847	dd_Smes_g4_76	2617095	2617103	ARNTHIF1A_MA0259.1	7.67823	+	dd_Smes_g4_76	2615494	2618812	8.01136	1	MSTRG.10887	arnt-1
1848	dd_Smes_g4_76	2843411	2843419	ARNTHIF1A_MA0259.1	8.93658	-	dd_Smes_g4_76	2842544	2844545	8.22746	1	MSTRG.10887	arnt-1
1853	dd_Smes_g4_77	804628	804636	ARNTHIF1A_MA0259.1	7.67823	+	dd_Smes_g4_77	802251	804679	7.4361	1	MSTRG.10887	arnt-1
1864	dd_Smes_g4_78	2186899	2186907	ARNTHIF1A_MA0259.1	9.77959	-	dd_Smes_g4_78	2185783	2187784	8.53099	1	MSTRG.10887	arnt-1
1879	dd_Smes_g4_8	828030	828038	ARNTHIF1A_MA0259.1	8.3965	+	dd_Smes_g4_8	826509	829088	9.20055	1	MSTRG.10887	arnt-1
1886	dd_Smes_g4_8	8597535	8597543	ARNTHIF1A_MA0259.1	8.21822	+	dd_Smes_g4_8	8596353	8599436	8.65197	1	MSTRG.10887	arnt-1
1887	dd_Smes_g4_8	8653197	8653205	ARNTHIF1A_MA0259.1	8.3965	-	dd_Smes_g4_8	8653169	8655170	10.6498	1	MSTRG.10887	arnt-1
1889	dd_Smes_g4_8	8670180	8670188	ARNTHIF1A_MA0259.1	7.99208	-	dd_Smes_g4_8	8668170	8671948	7.56117	1	MSTRG.10887	arnt-1
1892	dd_Smes_g4_8	8691431	8691439	ARNTHIF1A_MA0259.1	8.00498	+	dd_Smes_g4_8	8689734	8691735	11.0532	1	MSTRG.10887	arnt-1
1893	dd_Smes_g4_8	8691493	8691501	ARNTHIF1A_MA0259.1	8.37653	-	dd_Smes_g4_8	8689734	8691735	9.74489	1	MSTRG.10887	arnt-1
1909	dd_Smes_g4_83	737797	737805	ARNTHIF1A_MA0259.1	7.82974	+	dd_Smes_g4_83	737025	739026	9.79412	1	MSTRG.10887	arnt-1
1918	dd_Smes_g4_84	2142807	2142815	ARNTHIF1A_MA0259.1	8.14218	+	dd_Smes_g4_84	2141691	2144803	7.45044	1	MSTRG.10887	arnt-1
1919	dd_Smes_g4_84	2150391	2150399	ARNTHIF1A_MA0259.1	10.3369	+	dd_Smes_g4_84	2149219	2151220	12.947	1	MSTRG.10887	arnt-1
1931	dd_Smes_g4_86	1431146	1431154	ARNTHIF1A_MA0259.1	8.37653	+	dd_Smes_g4_86	1430880	1432881	9.56043	1	MSTRG.10887	arnt-1
1956	dd_Smes_g4_89	322809	322817	ARNTHIF1A_MA0259.1	7.99208	-	dd_Smes_g4_89	321722	323928	8.53055	1	MSTRG.10887	arnt-1
1992	dd_Smes_g4_91	1877558	1877566	ARNTHIF1A_MA0259.1	10.4953	+	dd_Smes_g4_91	1876567	1878730	7.67635	1	MSTRG.10887	arnt-1
1993	dd_Smes_g4_91	1877593	1877601	ARNTHIF1A_MA0259.1	9.86668	+	dd_Smes_g4_91	1876567	1878730	7.66068	1	MSTRG.10887	arnt-1
1999	dd_Smes_g4_93	1066817	1066825	ARNTHIF1A_MA0259.1	8.20652	+	dd_Smes_g4_93	1066490	1068491	7.98377	1	MSTRG.10887	arnt-1
2006	dd_Smes_g4_94	1957038	1957046	ARNTHIF1A_MA0259.1	7.9598	+	dd_Smes_g4_94	1956166	1958971	15.1409	1	MSTRG.10887	arnt-1
2071	dd_Smes_g4_1	4013149	4013158	AZF1_MA0277.1	7.64103	-	dd_Smes_g4_1	4011925	4013926	7.6027	1	MSTRG.7896	znf596
2080	dd_Smes_g4_1	5122472	5122481	AZF1_MA0277.1	8.14201	-	dd_Smes_g4_1	5121481	5123482	8.39114	1	MSTRG.7896	znf596
2091	dd_Smes_g4_1	8170778	8170787	AZF1_MA0277.1	8.29734	+	dd_Smes_g4_1	8170328	8172970	7.9474	1	MSTRG.7896	znf596
2107	dd_Smes_g4_1	11240569	11240578	AZF1_MA0277.1	7.64103	-	dd_Smes_g4_1	11239576	11241577	7.60124	1	MSTRG.7896	znf596
2305	dd_Smes_g4_11	4897910	4897919	AZF1_MA0277.1	8.14201	+	dd_Smes_g4_11	4896145	4898146	10.2288	1	MSTRG.7896	znf596
2329	dd_Smes_g4_110	194488	194497	AZF1_MA0277.1	7.64103	+	dd_Smes_g4_110	193322	195323	11.2538	1	MSTRG.7896	znf596
2628	dd_Smes_g4_131	816383	816392	AZF1_MA0277.1	7.64103	-	dd_Smes_g4_131	815370	817371	7.95815	1	MSTRG.7896	znf596
2726	dd_Smes_g4_138	844348	844357	AZF1_MA0277.1	8.29734	-	dd_Smes_g4_138	844260	846261	7.4028	1	MSTRG.7896	znf596
2942	dd_Smes_g4_15	3468498	3468507	AZF1_MA0277.1	8.14201	+	dd_Smes_g4_15	3467898	3470034	7.71818	1	MSTRG.7896	znf596
2949	dd_Smes_g4_15	3968772	3968781	AZF1_MA0277.1	7.64103	-	dd_Smes_g4_15	3967050	3969051	8.01256	1	MSTRG.7896	znf596
2982	dd_Smes_g4_15	6070251	6070260	AZF1_MA0277.1	7.64103	+	dd_Smes_g4_15	6070228	6072260	8.06225	1	MSTRG.7896	znf596
2984	dd_Smes_g4_15	6115493	6115502	AZF1_MA0277.1	7.64103	+	dd_Smes_g4_15	6115432	6117433	7.83067	1	MSTRG.7896	znf596
3016	dd_Smes_g4_15	7135197	7135206	AZF1_MA0277.1	8.29734	+	dd_Smes_g4_15	7133254	7136195	8.08465	1	MSTRG.7896	znf596
3018	dd_Smes_g4_15	7175816	7175825	AZF1_MA0277.1	7.64103	-	dd_Smes_g4_15	7174007	7176205	7.67266	1	MSTRG.7896	znf596
3028	dd_Smes_g4_15	7549156	7549165	AZF1_MA0277.1	7.64103	+	dd_Smes_g4_15	7548811	7550812	9.04298	1	MSTRG.7896	znf596
3072	dd_Smes_g4_157	1098494	1098503	AZF1_MA0277.1	8.29734	-	dd_Smes_g4_157	1097757	1100946	7.72536	1	MSTRG.7896	znf596
3489	dd_Smes_g4_196	155168	155177	AZF1_MA0277.1	7.64103	+	dd_Smes_g4_196	150950	155352	10.8453	1	MSTRG.7896	znf596
3854	dd_Smes_g4_232	498745	498754	AZF1_MA0277.1	7.64103	+	dd_Smes_g4_232	495426	499108	7.38715	1	MSTRG.7896	znf596
3863	dd_Smes_g4_239	342642	342651	AZF1_MA0277.1	8.29734	+	dd_Smes_g4_239	342608	345027	7.68397	1	MSTRG.7896	znf596
3896	dd_Smes_g4_241	473533	473542	AZF1_MA0277.1	7.64103	-	dd_Smes_g4_241	472070	474071	8.37765	1	MSTRG.7896	znf596
3970	dd_Smes_g4_262	31387	31396	AZF1_MA0277.1	7.64103	+	dd_Smes_g4_262	29407	32207	8.79471	1	MSTRG.7896	znf596
3975	dd_Smes_g4_265	39329	39338	AZF1_MA0277.1	7.64103	-	dd_Smes_g4_265	36093	43765	8.50377	1	MSTRG.7896	znf596
3987	dd_Smes_g4_265	562508	562517	AZF1_MA0277.1	8.14201	+	dd_Smes_g4_265	561815	564725	7.5818	1	MSTRG.7896	znf596
4066	dd_Smes_g4_29	1795764	1795773	AZF1_MA0277.1	8.29734	-	dd_Smes_g4_29	1794818	1796819	7.59626	1	MSTRG.7896	znf596
4092	dd_Smes_g4_290	143512	143521	AZF1_MA0277.1	8.29734	+	dd_Smes_g4_290	143432	145433	8.54964	1	MSTRG.7896	znf596
4325	dd_Smes_g4_37	586528	586537	AZF1_MA0277.1	7.64103	+	dd_Smes_g4_37	585958	587959	8.21558	1	MSTRG.7896	znf596
4552	dd_Smes_g4_43	2386955	2386964	AZF1_MA0277.1	8.14201	-	dd_Smes_g4_43	2385602	2388740	8.93977	1	MSTRG.7896	znf596
4571	dd_Smes_g4_44	1484012	1484021	AZF1_MA0277.1	8.29734	+	dd_Smes_g4_44	1483679	1485680	10.0414	1	MSTRG.7896	znf596
4702	dd_Smes_g4_50	642559	642568	AZF1_MA0277.1	8.29734	+	dd_Smes_g4_50	641648	643649	10.7647	1	MSTRG.7896	znf596
4703	dd_Smes_g4_50	642649	642658	AZF1_MA0277.1	8.29734	+	dd_Smes_g4_50	641648	643649	13.024	1	MSTRG.7896	znf596
4868	dd_Smes_g4_57	1755154	1755163	AZF1_MA0277.1	8.14201	-	dd_Smes_g4_57	1753613	1755614	7.50289	1	MSTRG.7896	znf596
4907	dd_Smes_g4_59	1827915	1827924	AZF1_MA0277.1	7.64103	-	dd_Smes_g4_59	1826861	1828862	7.47909	1	MSTRG.7896	znf596
4915	dd_Smes_g4_6	620586	620595	AZF1_MA0277.1	8.29734	+	dd_Smes_g4_6	619284	621327	7.77679	1	MSTRG.7896	znf596
4967	dd_Smes_g4_6	10495611	10495620	AZF1_MA0277.1	7.64103	-	dd_Smes_g4_6	10492954	10496545	8.54969	1	MSTRG.7896	znf596
5162	dd_Smes_g4_70	553511	553520	AZF1_MA0277.1	7.64103	-	dd_Smes_g4_70	552701	554844	7.8305	1	MSTRG.7896	znf596
5252	dd_Smes_g4_75	2473057	2473066	AZF1_MA0277.1	8.29734	-	dd_Smes_g4_75	2471849	2473850	7.81916	1	MSTRG.7896	znf596
5281	dd_Smes_g4_77	2929079	2929088	AZF1_MA0277.1	7.64103	-	dd_Smes_g4_77	2927233	2929234	8.37426	1	MSTRG.7896	znf596
5317	dd_Smes_g4_8	5084470	5084479	AZF1_MA0277.1	8.14201	-	dd_Smes_g4_8	5082625	5084626	10.3286	1	MSTRG.7896	znf596
5418	dd_Smes_g4_86	1431023	1431032	AZF1_MA0277.1	8.29734	+	dd_Smes_g4_86	1430880	1432881	7.37446	1	MSTRG.7896	znf596
5419	dd_Smes_g4_86	1882659	1882668	AZF1_MA0277.1	7.64103	-	dd_Smes_g4_86	1882409	1884410	8.57249	1	MSTRG.7896	znf596
5560	dd_Smes_g4_93	474348	474357	AZF1_MA0277.1	7.64103	-	dd_Smes_g4_93	473321	475322	8.81857	1	MSTRG.7896	znf596
5563	dd_Smes_g4_93	1066825	1066834	AZF1_MA0277.1	8.29734	+	dd_Smes_g4_93	1066490	1068491	8.34922	1	MSTRG.7896	znf596
5645	dd_Smes_g4_1	2911885	2911902	Alx1_MA0854.1	7.40895	-	dd_Smes_g4_1	2909301	2914441	9.04998	1	MSTRG.9597	pax3/7-1
5686	dd_Smes_g4_103	396330	396347	Alx1_MA0854.1	8.42196	+	dd_Smes_g4_103	395679	397680	7.75063	1	MSTRG.9597	pax3/7-1
5692	dd_Smes_g4_105	1815577	1815594	Alx1_MA0854.1	10.1963	-	dd_Smes_g4_105	1814564	1816565	7.6562	1	MSTRG.9597	pax3/7-1
5698	dd_Smes_g4_108	250708	250725	Alx1_MA0854.1	7.60294	+	dd_Smes_g4_108	246534	251764	9.03776	1	MSTRG.9597	pax3/7-1
5714	dd_Smes_g4_11	5439296	5439313	Alx1_MA0854.1	7.79453	+	dd_Smes_g4_11	5439289	5441290	8.25909	1	MSTRG.9597	pax3/7-1
5725	dd_Smes_g4_110	1486906	1486923	Alx1_MA0854.1	7.28432	-	dd_Smes_g4_110	1486216	1489832	8.81193	1	MSTRG.9597	pax3/7-1
5760	dd_Smes_g4_117	1527771	1527788	Alx1_MA0854.1	7.6019	+	dd_Smes_g4_117	1527032	1529238	7.37559	1	MSTRG.9597	pax3/7-1
5797	dd_Smes_g4_13	6212210	6212227	Alx1_MA0854.1	7.2541	-	dd_Smes_g4_13	6211334	6213335	7.6457	1	MSTRG.9597	pax3/7-1
5822	dd_Smes_g4_133	1454960	1454977	Alx1_MA0854.1	7.45954	+	dd_Smes_g4_133	1453547	1455646	8.23141	1	MSTRG.9597	pax3/7-1
5881	dd_Smes_g4_148	617872	617889	Alx1_MA0854.1	9.44798	+	dd_Smes_g4_148	616366	618367	7.50038	1	MSTRG.9597	pax3/7-1
5923	dd_Smes_g4_15	6213961	6213978	Alx1_MA0854.1	8.10586	+	dd_Smes_g4_15	6212383	6214384	7.68503	1	MSTRG.9597	pax3/7-1
5930	dd_Smes_g4_15	6865233	6865250	Alx1_MA0854.1	7.46583	-	dd_Smes_g4_15	6863894	6865895	7.71989	1	MSTRG.9597	pax3/7-1
6012	dd_Smes_g4_172	893870	893887	Alx1_MA0854.1	7.80478	+	dd_Smes_g4_172	892832	895000	8.72495	1	MSTRG.9597	pax3/7-1
6085	dd_Smes_g4_2	7557828	7557845	Alx1_MA0854.1	7.60996	-	dd_Smes_g4_2	7556540	7558541	8.04799	1	MSTRG.9597	pax3/7-1
6163	dd_Smes_g4_23	2078287	2078304	Alx1_MA0854.1	7.46448	-	dd_Smes_g4_23	2074359	2078615	7.45164	1	MSTRG.9597	pax3/7-1
6185	dd_Smes_g4_239	344404	344421	Alx1_MA0854.1	7.45086	-	dd_Smes_g4_239	342608	345027	9.75713	1	MSTRG.9597	pax3/7-1
6222	dd_Smes_g4_265	311700	311717	Alx1_MA0854.1	7.78379	-	dd_Smes_g4_265	311281	313334	8.83041	1	MSTRG.9597	pax3/7-1
6238	dd_Smes_g4_286	127903	127920	Alx1_MA0854.1	7.3167	+	dd_Smes_g4_286	127580	129803	7.59731	1	MSTRG.9597	pax3/7-1
6267	dd_Smes_g4_30	1669885	1669902	Alx1_MA0854.1	8.38356	+	dd_Smes_g4_30	1669480	1671481	9.11703	1	MSTRG.9597	pax3/7-1
6284	dd_Smes_g4_31	3744734	3744751	Alx1_MA0854.1	7.47133	+	dd_Smes_g4_31	3742976	3747666	7.44194	1	MSTRG.9597	pax3/7-1
6302	dd_Smes_g4_36	3293451	3293468	Alx1_MA0854.1	8.07333	+	dd_Smes_g4_36	3292451	3294452	8.48106	1	MSTRG.9597	pax3/7-1
6305	dd_Smes_g4_36	3563913	3563930	Alx1_MA0854.1	8.06432	+	dd_Smes_g4_36	3561870	3564328	8.11658	1	MSTRG.9597	pax3/7-1
6307	dd_Smes_g4_37	2183753	2183770	Alx1_MA0854.1	9.38316	-	dd_Smes_g4_37	2181046	2183923	8.55863	1	MSTRG.9597	pax3/7-1
6320	dd_Smes_g4_38	3281973	3281990	Alx1_MA0854.1	7.337	+	dd_Smes_g4_38	3280470	3283282	7.57551	1	MSTRG.9597	pax3/7-1
6323	dd_Smes_g4_38	4513605	4513622	Alx1_MA0854.1	7.9352	+	dd_Smes_g4_38	4512448	4515216	9.2767	1	MSTRG.9597	pax3/7-1
6363	dd_Smes_g4_428	28750	28767	Alx1_MA0854.1	8.38356	-	dd_Smes_g4_428	27933	29934	59.5206	1	MSTRG.9597	pax3/7-1
6368	dd_Smes_g4_434	40299	40316	Alx1_MA0854.1	7.67831	+	dd_Smes_g4_434	39483	41484	8.69301	1	MSTRG.9597	pax3/7-1
6371	dd_Smes_g4_44	1485100	1485117	Alx1_MA0854.1	9.22589	-	dd_Smes_g4_44	1483679	1485680	9.78936	1	MSTRG.9597	pax3/7-1
6402	dd_Smes_g4_5	9182598	9182615	Alx1_MA0854.1	9.09913	+	dd_Smes_g4_5	9179200	9183143	7.42968	1	MSTRG.9597	pax3/7-1
6464	dd_Smes_g4_57	2950083	2950100	Alx1_MA0854.1	8.23762	-	dd_Smes_g4_57	2948820	2950821	7.95955	1	MSTRG.9597	pax3/7-1
6470	dd_Smes_g4_59	1380093	1380110	Alx1_MA0854.1	7.80802	+	dd_Smes_g4_59	1378073	1381410	8.09459	1	MSTRG.9597	pax3/7-1
6486	dd_Smes_g4_6	10313490	10313507	Alx1_MA0854.1	7.55968	+	dd_Smes_g4_6	10313263	10315264	7.85936	1	MSTRG.9597	pax3/7-1
6495	dd_Smes_g4_61	2461665	2461682	Alx1_MA0854.1	7.35325	-	dd_Smes_g4_61	2460160	2462161	7.44809	1	MSTRG.9597	pax3/7-1
6506	dd_Smes_g4_64	1533265	1533282	Alx1_MA0854.1	7.83974	+	dd_Smes_g4_64	1531804	1533805	7.80872	1	MSTRG.9597	pax3/7-1
6522	dd_Smes_g4_67	502848	502865	Alx1_MA0854.1	7.96042	-	dd_Smes_g4_67	502123	504124	8.96208	1	MSTRG.9597	pax3/7-1
6547	dd_Smes_g4_70	1170663	1170680	Alx1_MA0854.1	7.77768	-	dd_Smes_g4_70	1168980	1172645	7.58063	1	MSTRG.9597	pax3/7-1
6606	dd_Smes_g4_83	290330	290347	Alx1_MA0854.1	9.01976	-	dd_Smes_g4_83	289642	291643	7.66981	1	MSTRG.9597	pax3/7-1
6608	dd_Smes_g4_83	600050	600067	Alx1_MA0854.1	8.86945	-	dd_Smes_g4_83	597872	601272	7.53837	1	MSTRG.9597	pax3/7-1
6623	dd_Smes_g4_85	481061	481078	Alx1_MA0854.1	7.28705	+	dd_Smes_g4_85	479944	481945	9.63169	1	MSTRG.9597	pax3/7-1
6656	dd_Smes_g4_90	546151	546168	Alx1_MA0854.1	8.39997	-	dd_Smes_g4_90	545326	548276	7.46862	1	MSTRG.9597	pax3/7-1
6662	dd_Smes_g4_91	323265	323282	Alx1_MA0854.1	7.46929	+	dd_Smes_g4_91	322950	327001	10.1503	1	MSTRG.9597	pax3/7-1
6665	dd_Smes_g4_91	2032603	2032620	Alx1_MA0854.1	7.69471	+	dd_Smes_g4_91	2031259	2033260	7.58623	1	MSTRG.9597	pax3/7-1
6680	dd_Smes_g4_97	1055751	1055768	Alx1_MA0854.1	10.169	-	dd_Smes_g4_97	1053840	1059480	9.9959	1	MSTRG.9597	pax3/7-1
6682	dd_Smes_g4_97	1390740	1390757	Alx1_MA0854.1	7.519	+	dd_Smes_g4_97	1389285	1391286	8.7967	1	MSTRG.9597	pax3/7-1
6734	dd_Smes_g4_103	396330	396347	Alx4_MA0853.1	9.17845	+	dd_Smes_g4_103	395679	397680	7.75063	1	MSTRG.6974	alx3-2
6739	dd_Smes_g4_105	1815577	1815594	Alx4_MA0853.1	11.0175	-	dd_Smes_g4_105	1814564	1816565	7.6562	1	MSTRG.6974	alx3-2
6759	dd_Smes_g4_11	5439296	5439313	Alx4_MA0853.1	7.94214	+	dd_Smes_g4_11	5439289	5441290	8.25909	1	MSTRG.6974	alx3-2
6767	dd_Smes_g4_110	1486906	1486923	Alx4_MA0853.1	7.2984	-	dd_Smes_g4_110	1486216	1489832	8.81193	1	MSTRG.6974	alx3-2
6802	dd_Smes_g4_117	1494161	1494178	Alx4_MA0853.1	7.27134	-	dd_Smes_g4_117	1493759	1495760	7.95014	1	MSTRG.6974	alx3-2
6870	dd_Smes_g4_135	1503339	1503356	Alx4_MA0853.1	7.57433	+	dd_Smes_g4_135	1501449	1504094	9.69159	1	MSTRG.6974	alx3-2
6884	dd_Smes_g4_14	3585809	3585826	Alx4_MA0853.1	8.14542	+	dd_Smes_g4_14	3585251	3587252	8.72038	1	MSTRG.6974	alx3-2
6907	dd_Smes_g4_145	1512637	1512654	Alx4_MA0853.1	7.39918	+	dd_Smes_g4_145	1511751	1513752	7.94244	1	MSTRG.6974	alx3-2
6919	dd_Smes_g4_148	617872	617889	Alx4_MA0853.1	8.03509	+	dd_Smes_g4_148	616366	618367	7.50038	1	MSTRG.6974	alx3-2
6955	dd_Smes_g4_15	6213961	6213978	Alx4_MA0853.1	7.93514	+	dd_Smes_g4_15	6212383	6214384	7.68503	1	MSTRG.6974	alx3-2
7034	dd_Smes_g4_172	893869	893886	Alx4_MA0853.1	7.27685	-	dd_Smes_g4_172	892832	895000	8.72495	1	MSTRG.6974	alx3-2
7106	dd_Smes_g4_2	7557828	7557845	Alx4_MA0853.1	8.23247	-	dd_Smes_g4_2	7556540	7558541	8.04799	1	MSTRG.6974	alx3-2
7184	dd_Smes_g4_23	2078287	2078304	Alx4_MA0853.1	8.029	-	dd_Smes_g4_23	2074359	2078615	7.45164	1	MSTRG.6974	alx3-2
7201	dd_Smes_g4_232	417675	417692	Alx4_MA0853.1	7.42783	-	dd_Smes_g4_232	417051	419052	9.82309	1	MSTRG.6974	alx3-2
7204	dd_Smes_g4_232	526688	526705	Alx4_MA0853.1	7.41758	+	dd_Smes_g4_232	525341	527342	8.5566	1	MSTRG.6974	alx3-2
7211	dd_Smes_g4_239	343007	343024	Alx4_MA0853.1	7.82413	-	dd_Smes_g4_239	342608	345027	8.18908	1	MSTRG.6974	alx3-2
7212	dd_Smes_g4_239	344404	344421	Alx4_MA0853.1	7.41593	-	dd_Smes_g4_239	342608	345027	9.75713	1	MSTRG.6974	alx3-2
7241	dd_Smes_g4_265	311700	311717	Alx4_MA0853.1	8.08207	-	dd_Smes_g4_265	311281	313334	8.83041	1	MSTRG.6974	alx3-2
7260	dd_Smes_g4_286	127903	127920	Alx4_MA0853.1	7.89851	+	dd_Smes_g4_286	127580	129803	7.59731	1	MSTRG.6974	alx3-2
7286	dd_Smes_g4_30	1669884	1669901	Alx4_MA0853.1	7.68555	-	dd_Smes_g4_30	1669480	1671481	9.12658	1	MSTRG.6974	alx3-2
7299	dd_Smes_g4_31	3744734	3744751	Alx4_MA0853.1	8.40313	+	dd_Smes_g4_31	3742976	3747666	7.44194	1	MSTRG.6974	alx3-2
7317	dd_Smes_g4_36	3563913	3563930	Alx4_MA0853.1	7.19058	+	dd_Smes_g4_36	3561870	3564328	8.11658	1	MSTRG.6974	alx3-2
7322	dd_Smes_g4_37	2183753	2183770	Alx4_MA0853.1	9.19883	-	dd_Smes_g4_37	2181046	2183923	8.55863	1	MSTRG.6974	alx3-2
7360	dd_Smes_g4_4	9686125	9686142	Alx4_MA0853.1	7.18948	+	dd_Smes_g4_4	9685045	9687046	8.12419	1	MSTRG.6974	alx3-2
7380	dd_Smes_g4_428	28751	28768	Alx4_MA0853.1	7.68555	+	dd_Smes_g4_428	27933	29934	59.5206	1	MSTRG.6974	alx3-2
7385	dd_Smes_g4_434	40299	40316	Alx4_MA0853.1	7.4143	+	dd_Smes_g4_434	39483	41484	8.69301	1	MSTRG.6974	alx3-2
7418	dd_Smes_g4_5	9182598	9182615	Alx4_MA0853.1	8.7125	+	dd_Smes_g4_5	9179200	9183143	7.42968	1	MSTRG.6974	alx3-2
7469	dd_Smes_g4_57	2950083	2950100	Alx4_MA0853.1	8.04815	-	dd_Smes_g4_57	2948820	2950821	7.95955	1	MSTRG.6974	alx3-2
7478	dd_Smes_g4_59	1380093	1380110	Alx4_MA0853.1	8.03808	+	dd_Smes_g4_59	1378073	1381410	8.09459	1	MSTRG.6974	alx3-2
7496	dd_Smes_g4_6	10313490	10313507	Alx4_MA0853.1	7.8662	+	dd_Smes_g4_6	10313263	10315264	7.85936	1	MSTRG.6974	alx3-2
7505	dd_Smes_g4_61	2461665	2461682	Alx4_MA0853.1	7.32001	-	dd_Smes_g4_61	2460160	2462161	7.44809	1	MSTRG.6974	alx3-2
7517	dd_Smes_g4_64	1533265	1533282	Alx4_MA0853.1	8.29366	+	dd_Smes_g4_64	1531804	1533805	7.80872	1	MSTRG.6974	alx3-2
7532	dd_Smes_g4_67	502848	502865	Alx4_MA0853.1	7.763	-	dd_Smes_g4_67	502123	504124	8.96208	1	MSTRG.6974	alx3-2
7556	dd_Smes_g4_70	1170664	1170681	Alx4_MA0853.1	7.74259	+	dd_Smes_g4_70	1168980	1172645	7.97322	1	MSTRG.6974	alx3-2
7608	dd_Smes_g4_83	290330	290347	Alx4_MA0853.1	7.5604	-	dd_Smes_g4_83	289642	291643	7.66981	1	MSTRG.6974	alx3-2
7610	dd_Smes_g4_83	600050	600067	Alx4_MA0853.1	8.35888	-	dd_Smes_g4_83	597872	601272	7.53837	1	MSTRG.6974	alx3-2
7632	dd_Smes_g4_86	1882564	1882581	Alx4_MA0853.1	7.47802	+	dd_Smes_g4_86	1882409	1884410	8.63266	1	MSTRG.6974	alx3-2
7659	dd_Smes_g4_91	323265	323282	Alx4_MA0853.1	7.4058	+	dd_Smes_g4_91	322950	327001	10.1503	1	MSTRG.6974	alx3-2
7675	dd_Smes_g4_97	1055751	1055768	Alx4_MA0853.1	8.77055	-	dd_Smes_g4_97	1053840	1059480	9.9959	1	MSTRG.6974	alx3-2
7678	dd_Smes_g4_97	1390740	1390757	Alx4_MA0853.1	8.04369	+	dd_Smes_g4_97	1389285	1391286	8.7967	1	MSTRG.6974	alx3-2
7687	dd_Smes_g4_1	863412	863419	Antp_MA0166.1	7.305	-	dd_Smes_g4_1	862317	864318	9.14494	1	MSTRG.7998:MSTRG.23420	Lox5a:Lox5b
7782	dd_Smes_g4_1	15280770	15280777	Antp_MA0166.1	7.305	-	dd_Smes_g4_1	15280038	15282039	7.36795	1	MSTRG.7998:MSTRG.23420	Lox5a:Lox5b
7784	dd_Smes_g4_1	15284785	15284792	Antp_MA0166.1	7.305	+	dd_Smes_g4_1	15283336	15286676	8.56934	1	MSTRG.7998:MSTRG.23420	Lox5a:Lox5b
7812	dd_Smes_g4_10	965103	965110	Antp_MA0166.1	7.305	-	dd_Smes_g4_10	963611	966656	12.363	1	MSTRG.7998:MSTRG.23420	Lox5a:Lox5b
7840	dd_Smes_g4_10	4154505	4154512	Antp_MA0166.1	7.305	+	dd_Smes_g4_10	4153456	4155457	7.62226	1	MSTRG.7998:MSTRG.23420	Lox5a:Lox5b
7849	dd_Smes_g4_10	4418210	4418217	Antp_MA0166.1	7.305	+	dd_Smes_g4_10	4417205	4419206	8.36677	1	MSTRG.7998:MSTRG.23420	Lox5a:Lox5b
7960	dd_Smes_g4_108	246831	246838	Antp_MA0166.1	7.305	+	dd_Smes_g4_108	246534	251764	9.15799	1	MSTRG.7998:MSTRG.23420	Lox5a:Lox5b
7964	dd_Smes_g4_108	250518	250525	Antp_MA0166.1	7.305	-	dd_Smes_g4_108	246534	251764	8.88126	1	MSTRG.7998:MSTRG.23420	Lox5a:Lox5b
8051	dd_Smes_g4_11	6643382	6643389	Antp_MA0166.1	7.305	-	dd_Smes_g4_11	6642564	6644565	7.74834	1	MSTRG.7998:MSTRG.23420	Lox5a:Lox5b
8058	dd_Smes_g4_110	189891	189898	Antp_MA0166.1	7.305	+	dd_Smes_g4_110	189014	191015	9.16855	1	MSTRG.7998:MSTRG.23420	Lox5a:Lox5b
8076	dd_Smes_g4_110	1486548	1486555	Antp_MA0166.1	7.305	+	dd_Smes_g4_110	1486216	1489832	8.594	1	MSTRG.7998:MSTRG.23420	Lox5a:Lox5b
8077	dd_Smes_g4_110	1487603	1487610	Antp_MA0166.1	7.305	+	dd_Smes_g4_110	1486216	1489832	8.78777	1	MSTRG.7998:MSTRG.23420	Lox5a:Lox5b
8081	dd_Smes_g4_110	1664637	1664644	Antp_MA0166.1	7.305	+	dd_Smes_g4_110	1663629	1666267	7.94744	1	MSTRG.7998:MSTRG.23420	Lox5a:Lox5b
8106	dd_Smes_g4_112	937202	937209	Antp_MA0166.1	7.305	+	dd_Smes_g4_112	935661	938503	8.90702	1	MSTRG.7998:MSTRG.23420	Lox5a:Lox5b
8195	dd_Smes_g4_117	1302056	1302063	Antp_MA0166.1	7.305	+	dd_Smes_g4_117	1301468	1303469	12.074	1	MSTRG.7998:MSTRG.23420	Lox5a:Lox5b
8363	dd_Smes_g4_13	683146	683153	Antp_MA0166.1	7.305	+	dd_Smes_g4_13	681880	683881	8.46564	1	MSTRG.7998:MSTRG.23420	Lox5a:Lox5b
8378	dd_Smes_g4_13	5719076	5719083	Antp_MA0166.1	7.305	+	dd_Smes_g4_13	5718030	5720152	7.59281	1	MSTRG.7998:MSTRG.23420	Lox5a:Lox5b
8438	dd_Smes_g4_132	1179622	1179629	Antp_MA0166.1	7.305	-	dd_Smes_g4_132	1177367	1182100	7.66082	1	MSTRG.7998:MSTRG.23420	Lox5a:Lox5b
8452	dd_Smes_g4_133	486761	486768	Antp_MA0166.1	7.305	-	dd_Smes_g4_133	485507	487508	7.66872	1	MSTRG.7998:MSTRG.23420	Lox5a:Lox5b
8495	dd_Smes_g4_134	1097736	1097743	Antp_MA0166.1	7.305	+	dd_Smes_g4_134	1096506	1098507	9.93774	1	MSTRG.7998:MSTRG.23420	Lox5a:Lox5b
8503	dd_Smes_g4_134	1431649	1431656	Antp_MA0166.1	7.305	-	dd_Smes_g4_134	1431526	1433527	8.30447	1	MSTRG.7998:MSTRG.23420	Lox5a:Lox5b
8594	dd_Smes_g4_14	4861415	4861422	Antp_MA0166.1	7.305	+	dd_Smes_g4_14	4859852	4861957	7.6412	1	MSTRG.7998:MSTRG.23420	Lox5a:Lox5b
8629	dd_Smes_g4_141	1384017	1384024	Antp_MA0166.1	7.305	-	dd_Smes_g4_141	1383605	1385771	7.38546	1	MSTRG.7998:MSTRG.23420	Lox5a:Lox5b
8745	dd_Smes_g4_15	2427017	2427024	Antp_MA0166.1	7.305	-	dd_Smes_g4_15	2425750	2427806	8.00732	1	MSTRG.7998:MSTRG.23420	Lox5a:Lox5b
8905	dd_Smes_g4_15	7549147	7549154	Antp_MA0166.1	7.305	+	dd_Smes_g4_15	7548811	7550812	9.04298	1	MSTRG.7998:MSTRG.23420	Lox5a:Lox5b
9031	dd_Smes_g4_16	2316900	2316907	Antp_MA0166.1	7.305	-	dd_Smes_g4_16	2315065	2317066	9.08461	1	MSTRG.7998:MSTRG.23420	Lox5a:Lox5b
9190	dd_Smes_g4_172	841299	841306	Antp_MA0166.1	7.305	-	dd_Smes_g4_172	840456	842646	8.17902	1	MSTRG.7998:MSTRG.23420	Lox5a:Lox5b
9248	dd_Smes_g4_175	179095	179102	Antp_MA0166.1	7.305	-	dd_Smes_g4_175	176370	179278	7.89201	1	MSTRG.7998:MSTRG.23420	Lox5a:Lox5b
9577	dd_Smes_g4_2	9726595	9726602	Antp_MA0166.1	7.305	+	dd_Smes_g4_2	9725091	9727300	8.35591	1	MSTRG.7998:MSTRG.23420	Lox5a:Lox5b
9726	dd_Smes_g4_202	533809	533816	Antp_MA0166.1	7.305	+	dd_Smes_g4_202	533688	535755	7.51204	1	MSTRG.7998:MSTRG.23420	Lox5a:Lox5b
9727	dd_Smes_g4_202	829658	829665	Antp_MA0166.1	7.305	+	dd_Smes_g4_202	827988	829989	8.27728	1	MSTRG.7998:MSTRG.23420	Lox5a:Lox5b
9728	dd_Smes_g4_204	166941	166948	Antp_MA0166.1	7.305	+	dd_Smes_g4_204	166208	168209	8.57392	1	MSTRG.7998:MSTRG.23420	Lox5a:Lox5b
9979	dd_Smes_g4_232	368245	368252	Antp_MA0166.1	7.305	+	dd_Smes_g4_232	366510	368511	7.58341	1	MSTRG.7998:MSTRG.23420	Lox5a:Lox5b
10022	dd_Smes_g4_24	1932099	1932106	Antp_MA0166.1	7.305	+	dd_Smes_g4_24	1931449	1933450	9.49108	1	MSTRG.7998:MSTRG.23420	Lox5a:Lox5b
10024	dd_Smes_g4_24	2229383	2229390	Antp_MA0166.1	7.305	+	dd_Smes_g4_24	2228822	2230823	7.76249	1	MSTRG.7998:MSTRG.23420	Lox5a:Lox5b
10036	dd_Smes_g4_24	6008387	6008394	Antp_MA0166.1	7.305	-	dd_Smes_g4_24	6008240	6010241	7.3704	1	MSTRG.7998:MSTRG.23420	Lox5a:Lox5b
10087	dd_Smes_g4_25	4244763	4244770	Antp_MA0166.1	7.305	+	dd_Smes_g4_25	4243228	4245229	7.9353	1	MSTRG.7998:MSTRG.23420	Lox5a:Lox5b
10097	dd_Smes_g4_25	5281014	5281021	Antp_MA0166.1	7.305	-	dd_Smes_g4_25	5279456	5281457	7.78867	1	MSTRG.7998:MSTRG.23420	Lox5a:Lox5b
10122	dd_Smes_g4_257	485622	485629	Antp_MA0166.1	7.305	-	dd_Smes_g4_257	484289	486290	12.2895	1	MSTRG.7998:MSTRG.23420	Lox5a:Lox5b
10130	dd_Smes_g4_26	2441212	2441219	Antp_MA0166.1	7.305	-	dd_Smes_g4_26	2438648	2441499	7.88391	1	MSTRG.7998:MSTRG.23420	Lox5a:Lox5b
10158	dd_Smes_g4_264	289865	289872	Antp_MA0166.1	7.305	+	dd_Smes_g4_264	288881	290882	7.47462	1	MSTRG.7998:MSTRG.23420	Lox5a:Lox5b
10159	dd_Smes_g4_265	38369	38376	Antp_MA0166.1	7.305	+	dd_Smes_g4_265	36093	43765	12.9077	1	MSTRG.7998:MSTRG.23420	Lox5a:Lox5b
10177	dd_Smes_g4_265	314162	314169	Antp_MA0166.1	7.305	+	dd_Smes_g4_265	314128	316129	8.07538	1	MSTRG.7998:MSTRG.23420	Lox5a:Lox5b
10293	dd_Smes_g4_29	1777361	1777368	Antp_MA0166.1	7.305	-	dd_Smes_g4_29	1775923	1777924	8.00159	1	MSTRG.7998:MSTRG.23420	Lox5a:Lox5b
10319	dd_Smes_g4_290	144035	144042	Antp_MA0166.1	7.305	+	dd_Smes_g4_290	143432	145433	8.33571	1	MSTRG.7998:MSTRG.23420	Lox5a:Lox5b
10340	dd_Smes_g4_3	26074	26081	Antp_MA0166.1	7.305	-	dd_Smes_g4_3	24655	26656	8.7509	1	MSTRG.7998:MSTRG.23420	Lox5a:Lox5b
10391	dd_Smes_g4_3	8695153	8695160	Antp_MA0166.1	7.305	+	dd_Smes_g4_3	8693174	8695175	9.043	1	MSTRG.7998:MSTRG.23420	Lox5a:Lox5b
10411	dd_Smes_g4_30	1670798	1670805	Antp_MA0166.1	7.305	-	dd_Smes_g4_30	1669480	1671481	7.4224	1	MSTRG.7998:MSTRG.23420	Lox5a:Lox5b
10561	dd_Smes_g4_354	8974	8981	Antp_MA0166.1	7.305	+	dd_Smes_g4_354	8039	10040	7.81246	1	MSTRG.7998:MSTRG.23420	Lox5a:Lox5b
10566	dd_Smes_g4_36	2109558	2109565	Antp_MA0166.1	7.305	+	dd_Smes_g4_36	2108188	2110189	7.5795	1	MSTRG.7998:MSTRG.23420	Lox5a:Lox5b
10582	dd_Smes_g4_36	3563921	3563928	Antp_MA0166.1	7.305	+	dd_Smes_g4_36	3561870	3564328	8.07886	1	MSTRG.7998:MSTRG.23420	Lox5a:Lox5b
10594	dd_Smes_g4_37	587476	587483	Antp_MA0166.1	7.305	+	dd_Smes_g4_37	585958	587959	10.3736	1	MSTRG.7998:MSTRG.23420	Lox5a:Lox5b
10729	dd_Smes_g4_4	4211092	4211099	Antp_MA0166.1	7.305	+	dd_Smes_g4_4	4210095	4212096	9.15617	1	MSTRG.7998:MSTRG.23420	Lox5a:Lox5b
10845	dd_Smes_g4_40	3437680	3437687	Antp_MA0166.1	7.305	-	dd_Smes_g4_40	3436840	3438841	8.11504	1	MSTRG.7998:MSTRG.23420	Lox5a:Lox5b
10932	dd_Smes_g4_44	1484299	1484306	Antp_MA0166.1	7.305	-	dd_Smes_g4_44	1483679	1485680	9.38287	1	MSTRG.7998:MSTRG.23420	Lox5a:Lox5b
10933	dd_Smes_g4_44	1484402	1484409	Antp_MA0166.1	7.305	+	dd_Smes_g4_44	1483679	1485680	12.6303	1	MSTRG.7998:MSTRG.23420	Lox5a:Lox5b
10934	dd_Smes_g4_44	1485457	1485464	Antp_MA0166.1	7.305	+	dd_Smes_g4_44	1483679	1485680	9.3037	1	MSTRG.7998:MSTRG.23420	Lox5a:Lox5b
10935	dd_Smes_g4_44	1485520	1485527	Antp_MA0166.1	7.305	+	dd_Smes_g4_44	1483679	1485680	11.8597	1	MSTRG.7998:MSTRG.23420	Lox5a:Lox5b
10946	dd_Smes_g4_45	2389690	2389697	Antp_MA0166.1	7.305	-	dd_Smes_g4_45	2388689	2390690	8.00569	1	MSTRG.7998:MSTRG.23420	Lox5a:Lox5b
10976	dd_Smes_g4_47	2376784	2376791	Antp_MA0166.1	7.305	+	dd_Smes_g4_47	2376733	2378734	7.38446	1	MSTRG.7998:MSTRG.23420	Lox5a:Lox5b
10999	dd_Smes_g4_49	2818695	2818702	Antp_MA0166.1	7.305	-	dd_Smes_g4_49	2817435	2819436	7.75213	1	MSTRG.7998:MSTRG.23420	Lox5a:Lox5b
11001	dd_Smes_g4_49	2983076	2983083	Antp_MA0166.1	7.305	-	dd_Smes_g4_49	2981723	2983724	8.83169	1	MSTRG.7998:MSTRG.23420	Lox5a:Lox5b
11067	dd_Smes_g4_5	9180783	9180790	Antp_MA0166.1	7.305	+	dd_Smes_g4_5	9179200	9183143	7.91038	1	MSTRG.7998:MSTRG.23420	Lox5a:Lox5b
11102	dd_Smes_g4_50	2020874	2020881	Antp_MA0166.1	7.305	-	dd_Smes_g4_50	2020031	2022403	7.99456	1	MSTRG.7998:MSTRG.23420	Lox5a:Lox5b
11143	dd_Smes_g4_51	3086189	3086196	Antp_MA0166.1	7.305	-	dd_Smes_g4_51	3084934	3086935	7.87698	1	MSTRG.7998:MSTRG.23420	Lox5a:Lox5b
11266	dd_Smes_g4_55	5971	5978	Antp_MA0166.1	7.305	+	dd_Smes_g4_55	5096	7097	20.5375	1	MSTRG.7998:MSTRG.23420	Lox5a:Lox5b
11267	dd_Smes_g4_55	6323	6330	Antp_MA0166.1	7.305	+	dd_Smes_g4_55	5096	7097	42.0868	1	MSTRG.7998:MSTRG.23420	Lox5a:Lox5b
11621	dd_Smes_g4_69	1332368	1332375	Antp_MA0166.1	7.305	+	dd_Smes_g4_69	1331407	1333449	7.67392	1	MSTRG.7998:MSTRG.23420	Lox5a:Lox5b
11687	dd_Smes_g4_70	1485393	1485400	Antp_MA0166.1	7.305	-	dd_Smes_g4_70	1483936	1485937	8.17577	1	MSTRG.7998:MSTRG.23420	Lox5a:Lox5b
11764	dd_Smes_g4_74	114701	114708	Antp_MA0166.1	7.305	+	dd_Smes_g4_74	113299	115300	7.77614	1	MSTRG.7998:MSTRG.23420	Lox5a:Lox5b
11805	dd_Smes_g4_76	1593372	1593379	Antp_MA0166.1	7.305	+	dd_Smes_g4_76	1593109	1595110	8.36367	1	MSTRG.7998:MSTRG.23420	Lox5a:Lox5b
11811	dd_Smes_g4_76	2849062	2849069	Antp_MA0166.1	7.305	+	dd_Smes_g4_76	2848657	2850658	8.57232	1	MSTRG.7998:MSTRG.23420	Lox5a:Lox5b
11844	dd_Smes_g4_78	2567547	2567554	Antp_MA0166.1	7.305	+	dd_Smes_g4_78	2566299	2568300	7.95976	1	MSTRG.7998:MSTRG.23420	Lox5a:Lox5b
11923	dd_Smes_g4_81	2594914	2594921	Antp_MA0166.1	7.305	+	dd_Smes_g4_81	2593387	2595427	8.09399	1	MSTRG.7998:MSTRG.23420	Lox5a:Lox5b
11945	dd_Smes_g4_83	600052	600059	Antp_MA0166.1	7.305	-	dd_Smes_g4_83	597872	601272	7.36791	1	MSTRG.7998:MSTRG.23420	Lox5a:Lox5b
12031	dd_Smes_g4_87	1168014	1168021	Antp_MA0166.1	7.305	+	dd_Smes_g4_87	1164470	1168436	10.0758	1	MSTRG.7998:MSTRG.23420	Lox5a:Lox5b
12187	dd_Smes_g4_93	500594	500601	Antp_MA0166.1	7.305	-	dd_Smes_g4_93	499177	501879	8.00417	1	MSTRG.7998:MSTRG.23420	Lox5a:Lox5b
12207	dd_Smes_g4_94	1957310	1957317	Antp_MA0166.1	7.305	+	dd_Smes_g4_94	1956166	1958971	8.07518	1	MSTRG.7998:MSTRG.23420	Lox5a:Lox5b
12216	dd_Smes_g4_94	2259122	2259129	Antp_MA0166.1	7.305	-	dd_Smes_g4_94	2258119	2260219	14.3682	1	MSTRG.7998:MSTRG.23420	Lox5a:Lox5b
12218	dd_Smes_g4_94	2315553	2315560	Antp_MA0166.1	7.305	+	dd_Smes_g4_94	2315153	2317154	7.98858	1	MSTRG.7998:MSTRG.23420	Lox5a:Lox5b
12301	dd_Smes_g4_1	2151167	2151177	BARHL2_MA0635.1	7.40005	-	dd_Smes_g4_1	2150212	2152213	7.51559	1	MSTRG.21923:MSTRG.9638	barhl2-1:barhl2-2
12314	dd_Smes_g4_1	8172451	8172461	BARHL2_MA0635.1	7.67175	+	dd_Smes_g4_1	8170328	8172970	11.2665	1	MSTRG.21923:MSTRG.9638	barhl2-1:barhl2-2
12377	dd_Smes_g4_11	3888270	3888280	BARHL2_MA0635.1	7.20816	+	dd_Smes_g4_11	3887038	3889039	7.86672	1	MSTRG.21923:MSTRG.9638	barhl2-1:barhl2-2
12387	dd_Smes_g4_110	485307	485317	BARHL2_MA0635.1	7.28361	+	dd_Smes_g4_110	483532	485533	8.47154	1	MSTRG.21923:MSTRG.9638	barhl2-1:barhl2-2
12418	dd_Smes_g4_117	998652	998662	BARHL2_MA0635.1	8.58114	+	dd_Smes_g4_117	998359	1000489	8.64215	1	MSTRG.21923:MSTRG.9638	barhl2-1:barhl2-2
12420	dd_Smes_g4_117	1302471	1302481	BARHL2_MA0635.1	7.53521	+	dd_Smes_g4_117	1301468	1303469	8.16504	1	MSTRG.21923:MSTRG.9638	barhl2-1:barhl2-2
12430	dd_Smes_g4_12	893911	893921	BARHL2_MA0635.1	7.6162	+	dd_Smes_g4_12	892042	894043	8.29105	1	MSTRG.21923:MSTRG.9638	barhl2-1:barhl2-2
12437	dd_Smes_g4_12	8178622	8178632	BARHL2_MA0635.1	7.94018	+	dd_Smes_g4_12	8177820	8179821	7.77647	1	MSTRG.21923:MSTRG.9638	barhl2-1:barhl2-2
12438	dd_Smes_g4_12	8178643	8178653	BARHL2_MA0635.1	7.32174	+	dd_Smes_g4_12	8177820	8179821	10.428	1	MSTRG.21923:MSTRG.9638	barhl2-1:barhl2-2
12457	dd_Smes_g4_129	403880	403890	BARHL2_MA0635.1	7.99323	+	dd_Smes_g4_129	402386	404511	8.31912	1	MSTRG.21923:MSTRG.9638	barhl2-1:barhl2-2
12469	dd_Smes_g4_13	1070407	1070417	BARHL2_MA0635.1	7.20816	-	dd_Smes_g4_13	1069373	1071374	8.93537	1	MSTRG.21923:MSTRG.9638	barhl2-1:barhl2-2
12508	dd_Smes_g4_134	656333	656343	BARHL2_MA0635.1	7.44054	-	dd_Smes_g4_134	654898	656899	7.38403	1	MSTRG.21923:MSTRG.9638	barhl2-1:barhl2-2
12510	dd_Smes_g4_134	790124	790134	BARHL2_MA0635.1	7.32174	-	dd_Smes_g4_134	789453	791696	8.34287	1	MSTRG.21923:MSTRG.9638	barhl2-1:barhl2-2
12518	dd_Smes_g4_138	154561	154571	BARHL2_MA0635.1	7.27863	+	dd_Smes_g4_138	153494	155495	7.8668	1	MSTRG.21923:MSTRG.9638	barhl2-1:barhl2-2
12583	dd_Smes_g4_15	1176228	1176238	BARHL2_MA0635.1	7.17841	+	dd_Smes_g4_15	1174545	1177781	8.15401	1	MSTRG.21923:MSTRG.9638	barhl2-1:barhl2-2
12596	dd_Smes_g4_15	3468770	3468780	BARHL2_MA0635.1	7.43248	-	dd_Smes_g4_15	3467898	3470034	7.60485	1	MSTRG.21923:MSTRG.9638	barhl2-1:barhl2-2
12619	dd_Smes_g4_15	6256344	6256354	BARHL2_MA0635.1	7.39788	+	dd_Smes_g4_15	6254719	6256720	8.90863	1	MSTRG.21923:MSTRG.9638	barhl2-1:barhl2-2
12630	dd_Smes_g4_15	7531737	7531747	BARHL2_MA0635.1	7.20816	-	dd_Smes_g4_15	7528944	7532541	7.41708	1	MSTRG.21923:MSTRG.9638	barhl2-1:barhl2-2
12640	dd_Smes_g4_157	312941	312951	BARHL2_MA0635.1	8.60275	+	dd_Smes_g4_157	311794	313965	9.99741	1	MSTRG.21923:MSTRG.9638	barhl2-1:barhl2-2
12645	dd_Smes_g4_157	622905	622915	BARHL2_MA0635.1	7.33347	-	dd_Smes_g4_157	621624	623625	9.4734	1	MSTRG.21923:MSTRG.9638	barhl2-1:barhl2-2
12697	dd_Smes_g4_172	209664	209674	BARHL2_MA0635.1	7.55295	+	dd_Smes_g4_172	208289	210290	7.69679	1	MSTRG.21923:MSTRG.9638	barhl2-1:barhl2-2
12703	dd_Smes_g4_172	884586	884596	BARHL2_MA0635.1	7.35975	-	dd_Smes_g4_172	878072	888187	7.55086	1	MSTRG.21923:MSTRG.9638	barhl2-1:barhl2-2
12706	dd_Smes_g4_172	893873	893883	BARHL2_MA0635.1	7.51482	-	dd_Smes_g4_172	892832	895000	8.72495	1	MSTRG.21923:MSTRG.9638	barhl2-1:barhl2-2
12758	dd_Smes_g4_186	100314	100324	BARHL2_MA0635.1	7.63623	+	dd_Smes_g4_186	99012	101013	7.74797	1	MSTRG.21923:MSTRG.9638	barhl2-1:barhl2-2
12764	dd_Smes_g4_186	924586	924596	BARHL2_MA0635.1	7.30636	+	dd_Smes_g4_186	921000	925162	8.16874	1	MSTRG.21923:MSTRG.9638	barhl2-1:barhl2-2
12768	dd_Smes_g4_187	490533	490543	BARHL2_MA0635.1	7.43248	-	dd_Smes_g4_187	489628	492457	10.7366	1	MSTRG.21923:MSTRG.9638	barhl2-1:barhl2-2
12864	dd_Smes_g4_21	1763549	1763559	BARHL2_MA0635.1	8.50003	-	dd_Smes_g4_21	1762581	1764582	7.63932	1	MSTRG.21923:MSTRG.9638	barhl2-1:barhl2-2
12916	dd_Smes_g4_232	415338	415348	BARHL2_MA0635.1	7.24497	-	dd_Smes_g4_232	414171	416521	9.7379	1	MSTRG.21923:MSTRG.9638	barhl2-1:barhl2-2
12975	dd_Smes_g4_265	256841	256851	BARHL2_MA0635.1	7.45409	+	dd_Smes_g4_265	255462	257463	7.76864	1	MSTRG.21923:MSTRG.9638	barhl2-1:barhl2-2
12978	dd_Smes_g4_265	312154	312164	BARHL2_MA0635.1	7.47017	-	dd_Smes_g4_265	311281	313334	7.94341	1	MSTRG.21923:MSTRG.9638	barhl2-1:barhl2-2
13016	dd_Smes_g4_297	76722	76732	BARHL2_MA0635.1	7.13216	+	dd_Smes_g4_297	75458	77459	7.94344	1	MSTRG.21923:MSTRG.9638	barhl2-1:barhl2-2
13051	dd_Smes_g4_31	2466205	2466215	BARHL2_MA0635.1	7.75647	-	dd_Smes_g4_31	2465322	2467323	8.49424	1	MSTRG.21923:MSTRG.9638	barhl2-1:barhl2-2
13052	dd_Smes_g4_31	2467028	2467038	BARHL2_MA0635.1	7.55295	-	dd_Smes_g4_31	2465322	2467323	13.6274	1	MSTRG.21923:MSTRG.9638	barhl2-1:barhl2-2
13073	dd_Smes_g4_34	788230	788240	BARHL2_MA0635.1	7.08555	+	dd_Smes_g4_34	787148	789149	7.89401	1	MSTRG.21923:MSTRG.9638	barhl2-1:barhl2-2
13096	dd_Smes_g4_37	587641	587651	BARHL2_MA0635.1	7.1963	+	dd_Smes_g4_37	585958	587959	7.43776	1	MSTRG.21923:MSTRG.9638	barhl2-1:barhl2-2
13136	dd_Smes_g4_4	6755999	6756009	BARHL2_MA0635.1	7.51211	+	dd_Smes_g4_4	6754106	6756107	7.71407	1	MSTRG.21923:MSTRG.9638	barhl2-1:barhl2-2
13147	dd_Smes_g4_4	12518844	12518854	BARHL2_MA0635.1	7.51482	+	dd_Smes_g4_4	12517132	12519133	8.24002	1	MSTRG.21923:MSTRG.9638	barhl2-1:barhl2-2
13171	dd_Smes_g4_428	28807	28817	BARHL2_MA0635.1	7.15599	-	dd_Smes_g4_428	27933	29934	132.465	1	MSTRG.21923:MSTRG.9638	barhl2-1:barhl2-2
13176	dd_Smes_g4_44	1484535	1484545	BARHL2_MA0635.1	8.0429	-	dd_Smes_g4_44	1483679	1485680	14.0457	1	MSTRG.21923:MSTRG.9638	barhl2-1:barhl2-2
13200	dd_Smes_g4_49	2746973	2746983	BARHL2_MA0635.1	7.58657	-	dd_Smes_g4_49	2746303	2748304	7.59801	1	MSTRG.21923:MSTRG.9638	barhl2-1:barhl2-2
13215	dd_Smes_g4_5	8484086	8484096	BARHL2_MA0635.1	8.81452	-	dd_Smes_g4_5	8483233	8485234	9.84706	1	MSTRG.21923:MSTRG.9638	barhl2-1:barhl2-2
13218	dd_Smes_g4_5	10631749	10631759	BARHL2_MA0635.1	8.68387	-	dd_Smes_g4_5	10629669	10633621	7.8502	1	MSTRG.21923:MSTRG.9638	barhl2-1:barhl2-2
13221	dd_Smes_g4_50	642235	642245	BARHL2_MA0635.1	7.94018	+	dd_Smes_g4_50	641648	643649	7.73168	1	MSTRG.21923:MSTRG.9638	barhl2-1:barhl2-2
13222	dd_Smes_g4_50	642264	642274	BARHL2_MA0635.1	7.23814	-	dd_Smes_g4_50	641648	643649	7.58755	1	MSTRG.21923:MSTRG.9638	barhl2-1:barhl2-2
13263	dd_Smes_g4_55	169267	169277	BARHL2_MA0635.1	8.50841	+	dd_Smes_g4_55	167082	169869	9.08373	1	MSTRG.21923:MSTRG.9638	barhl2-1:barhl2-2
13282	dd_Smes_g4_57	2949864	2949874	BARHL2_MA0635.1	7.51079	-	dd_Smes_g4_57	2948820	2950821	8.30776	1	MSTRG.21923:MSTRG.9638	barhl2-1:barhl2-2
13284	dd_Smes_g4_57	3474602	3474612	BARHL2_MA0635.1	7.43248	+	dd_Smes_g4_57	3473840	3475841	8.12113	1	MSTRG.21923:MSTRG.9638	barhl2-1:barhl2-2
13373	dd_Smes_g4_7	2355534	2355544	BARHL2_MA0635.1	7.47433	-	dd_Smes_g4_7	2354291	2356849	72.2466	1	MSTRG.21923:MSTRG.9638	barhl2-1:barhl2-2
13410	dd_Smes_g4_76	2519238	2519248	BARHL2_MA0635.1	7.17841	+	dd_Smes_g4_76	2518637	2521940	10.3361	1	MSTRG.21923:MSTRG.9638	barhl2-1:barhl2-2
13420	dd_Smes_g4_78	41544	41554	BARHL2_MA0635.1	7.23814	-	dd_Smes_g4_78	40670	42671	13.1031	1	MSTRG.21923:MSTRG.9638	barhl2-1:barhl2-2
13456	dd_Smes_g4_84	2143666	2143676	BARHL2_MA0635.1	8.58114	-	dd_Smes_g4_84	2141691	2144803	9.31918	1	MSTRG.21923:MSTRG.9638	barhl2-1:barhl2-2
13501	dd_Smes_g4_91	323143	323153	BARHL2_MA0635.1	7.29902	+	dd_Smes_g4_91	322950	327001	8.72124	1	MSTRG.21923:MSTRG.9638	barhl2-1:barhl2-2
13543	dd_Smes_g4_1	7402490	7402502	BHLHE23_MA0817.1	6.48331	+	dd_Smes_g4_1	7401940	7403993	9.70771	1	MSTRG.23513	e22/23
13597	dd_Smes_g4_114	1178638	1178650	BHLHE23_MA0817.1	10.3665	-	dd_Smes_g4_114	1176714	1179849	8.78319	1	MSTRG.23513	e22/23
13612	dd_Smes_g4_12	6465069	6465081	BHLHE23_MA0817.1	7.84858	+	dd_Smes_g4_12	6464370	6466371	9.07811	1	MSTRG.23513	e22/23
13640	dd_Smes_g4_133	1557783	1557795	BHLHE23_MA0817.1	9.50393	+	dd_Smes_g4_133	1555855	1557856	7.51598	1	MSTRG.23513	e22/23
13673	dd_Smes_g4_144	838955	838967	BHLHE23_MA0817.1	6.94821	+	dd_Smes_g4_144	838175	840176	8.53227	1	MSTRG.23513	e22/23
13692	dd_Smes_g4_15	7407031	7407043	BHLHE23_MA0817.1	6.42653	-	dd_Smes_g4_15	7405851	7407861	7.7119	1	MSTRG.23513	e22/23
13699	dd_Smes_g4_154	1121200	1121212	BHLHE23_MA0817.1	6.4628	+	dd_Smes_g4_154	1120088	1122089	8.8259	1	MSTRG.23513	e22/23
13702	dd_Smes_g4_157	465273	465285	BHLHE23_MA0817.1	7.51588	-	dd_Smes_g4_157	465024	467128	9.92796	1	MSTRG.23513	e22/23
13704	dd_Smes_g4_157	1129664	1129676	BHLHE23_MA0817.1	6.46046	+	dd_Smes_g4_157	1129508	1131509	7.98492	1	MSTRG.23513	e22/23
13711	dd_Smes_g4_16	2558849	2558861	BHLHE23_MA0817.1	6.8325	-	dd_Smes_g4_16	2557713	2559714	10.028	1	MSTRG.23513	e22/23
13715	dd_Smes_g4_16	3984405	3984417	BHLHE23_MA0817.1	10.8207	-	dd_Smes_g4_16	3983471	3985472	7.68744	1	MSTRG.23513	e22/23
13720	dd_Smes_g4_164	792538	792550	BHLHE23_MA0817.1	7.26836	+	dd_Smes_g4_164	790716	794548	11.5708	1	MSTRG.23513	e22/23
13760	dd_Smes_g4_186	937499	937511	BHLHE23_MA0817.1	8.40807	-	dd_Smes_g4_186	931928	938875	7.4336	1	MSTRG.23513	e22/23
13767	dd_Smes_g4_19	790553	790565	BHLHE23_MA0817.1	7.52136	-	dd_Smes_g4_19	790497	792498	7.9164	1	MSTRG.23513	e22/23
13770	dd_Smes_g4_19	1551430	1551442	BHLHE23_MA0817.1	10.5242	-	dd_Smes_g4_19	1550218	1554331	7.73361	1	MSTRG.23513	e22/23
13773	dd_Smes_g4_19	3810348	3810360	BHLHE23_MA0817.1	7.40918	+	dd_Smes_g4_19	3809359	3811360	7.48093	1	MSTRG.23513	e22/23
13823	dd_Smes_g4_219	290369	290381	BHLHE23_MA0817.1	7.15046	+	dd_Smes_g4_219	288222	290738	7.40335	1	MSTRG.23513	e22/23
13839	dd_Smes_g4_231	448487	448499	BHLHE23_MA0817.1	9.9499	-	dd_Smes_g4_231	447492	449493	8.25756	1	MSTRG.23513	e22/23
13848	dd_Smes_g4_24	2133761	2133773	BHLHE23_MA0817.1	8.06611	-	dd_Smes_g4_24	2132331	2134332	8.15463	1	MSTRG.23513	e22/23
13896	dd_Smes_g4_3	3453428	3453440	BHLHE23_MA0817.1	6.86656	+	dd_Smes_g4_3	3452669	3454810	8.13728	1	MSTRG.23513	e22/23
13904	dd_Smes_g4_30	3015395	3015407	BHLHE23_MA0817.1	10.1117	+	dd_Smes_g4_30	3014058	3016998	8.5753	1	MSTRG.23513	e22/23
13921	dd_Smes_g4_35	1403507	1403519	BHLHE23_MA0817.1	6.53445	-	dd_Smes_g4_35	1403280	1405309	8.73109	1	MSTRG.23513	e22/23
13948	dd_Smes_g4_4	9686114	9686126	BHLHE23_MA0817.1	7.7678	+	dd_Smes_g4_4	9685045	9687046	7.58256	1	MSTRG.23513	e22/23
13953	dd_Smes_g4_40	3063902	3063914	BHLHE23_MA0817.1	10.6181	+	dd_Smes_g4_40	3063250	3065251	8.59381	1	MSTRG.23513	e22/23
13965	dd_Smes_g4_43	2387799	2387811	BHLHE23_MA0817.1	6.86904	+	dd_Smes_g4_43	2385602	2388740	9.93149	1	MSTRG.23513	e22/23
13984	dd_Smes_g4_49	2985811	2985823	BHLHE23_MA0817.1	9.1816	+	dd_Smes_g4_49	2984822	2989039	8.289	1	MSTRG.23513	e22/23
13999	dd_Smes_g4_52	675384	675396	BHLHE23_MA0817.1	8.93247	-	dd_Smes_g4_52	674438	676439	7.49555	1	MSTRG.23513	e22/23
14003	dd_Smes_g4_53	2351119	2351131	BHLHE23_MA0817.1	7.89105	+	dd_Smes_g4_53	2345424	2352507	7.85029	1	MSTRG.23513	e22/23
14016	dd_Smes_g4_57	1782785	1782797	BHLHE23_MA0817.1	9.82326	+	dd_Smes_g4_57	1782010	1784011	8.37598	1	MSTRG.23513	e22/23
14035	dd_Smes_g4_61	2568963	2568975	BHLHE23_MA0817.1	6.86904	-	dd_Smes_g4_61	2565341	2569020	12.4698	1	MSTRG.23513	e22/23
14062	dd_Smes_g4_70	942388	942400	BHLHE23_MA0817.1	6.86656	-	dd_Smes_g4_70	941655	943703	8.66552	1	MSTRG.23513	e22/23
14084	dd_Smes_g4_8	827928	827940	BHLHE23_MA0817.1	7.22331	-	dd_Smes_g4_8	826509	829088	8.54786	1	MSTRG.23513	e22/23
14101	dd_Smes_g4_86	1431583	1431595	BHLHE23_MA0817.1	6.51022	-	dd_Smes_g4_86	1430880	1432881	7.78957	1	MSTRG.23513	e22/23
14148	dd_Smes_g4_1	4704859	4704867	BSX_MA0876.1	7.33512	+	dd_Smes_g4_1	4703314	4708303	8.73489	1	MSTRG.10410	bsx
14185	dd_Smes_g4_105	1815667	1815675	BSX_MA0876.1	7.33512	-	dd_Smes_g4_105	1814564	1816565	7.86808	1	MSTRG.10410	bsx
14217	dd_Smes_g4_110	189651	189659	BSX_MA0876.1	7.66135	-	dd_Smes_g4_110	189014	191015	8.09932	1	MSTRG.10410	bsx
14219	dd_Smes_g4_110	485308	485316	BSX_MA0876.1	7.35507	-	dd_Smes_g4_110	483532	485533	8.47154	1	MSTRG.10410	bsx
14222	dd_Smes_g4_110	1145847	1145855	BSX_MA0876.1	7.35507	+	dd_Smes_g4_110	1144887	1146888	7.9144	1	MSTRG.10410	bsx
14263	dd_Smes_g4_12	893912	893920	BSX_MA0876.1	7.66135	-	dd_Smes_g4_12	892042	894043	8.29105	1	MSTRG.10410	bsx
14285	dd_Smes_g4_127	1868195	1868203	BSX_MA0876.1	7.24552	-	dd_Smes_g4_127	1867600	1869601	7.57383	1	MSTRG.10410	bsx
14295	dd_Smes_g4_129	322856	322864	BSX_MA0876.1	7.35507	-	dd_Smes_g4_129	321945	323946	7.48589	1	MSTRG.10410	bsx
14310	dd_Smes_g4_13	6009397	6009405	BSX_MA0876.1	7.22557	-	dd_Smes_g4_13	6008305	6010306	7.7603	1	MSTRG.10410	bsx
14314	dd_Smes_g4_13	6624463	6624471	BSX_MA0876.1	7.33512	+	dd_Smes_g4_13	6623512	6625513	8.11202	1	MSTRG.10410	bsx
14351	dd_Smes_g4_133	1454942	1454950	BSX_MA0876.1	7.24552	+	dd_Smes_g4_133	1453547	1455646	7.39724	1	MSTRG.10410	bsx
14354	dd_Smes_g4_133	1557791	1557799	BSX_MA0876.1	7.22557	+	dd_Smes_g4_133	1555855	1557856	9.02248	1	MSTRG.10410	bsx
14364	dd_Smes_g4_134	1378350	1378358	BSX_MA0876.1	7.10385	+	dd_Smes_g4_134	1377261	1380860	7.43135	1	MSTRG.10410	bsx
14368	dd_Smes_g4_134	1416887	1416895	BSX_MA0876.1	7.22557	-	dd_Smes_g4_134	1415842	1418595	8.44626	1	MSTRG.10410	bsx
14370	dd_Smes_g4_135	1503343	1503351	BSX_MA0876.1	7.35507	-	dd_Smes_g4_135	1501449	1504094	9.69159	1	MSTRG.10410	bsx
14419	dd_Smes_g4_145	1512641	1512649	BSX_MA0876.1	7.35507	-	dd_Smes_g4_145	1511751	1513752	7.94244	1	MSTRG.10410	bsx
14452	dd_Smes_g4_15	5820344	5820352	BSX_MA0876.1	7.33512	-	dd_Smes_g4_15	5819026	5821446	9.15335	1	MSTRG.10410	bsx
14461	dd_Smes_g4_15	6213889	6213897	BSX_MA0876.1	7.10385	+	dd_Smes_g4_15	6212383	6214384	8.44049	1	MSTRG.10410	bsx
14480	dd_Smes_g4_15	7630460	7630468	BSX_MA0876.1	7.33512	-	dd_Smes_g4_15	7628502	7630503	8.37884	1	MSTRG.10410	bsx
14482	dd_Smes_g4_15	7792420	7792428	BSX_MA0876.1	7.78307	-	dd_Smes_g4_15	7791332	7793333	7.40523	1	MSTRG.10410	bsx
14497	dd_Smes_g4_157	494314	494322	BSX_MA0876.1	7.24552	-	dd_Smes_g4_157	493965	495966	7.38872	1	MSTRG.10410	bsx
14551	dd_Smes_g4_17	4654719	4654727	BSX_MA0876.1	7.76311	+	dd_Smes_g4_17	4653330	4655331	8.39528	1	MSTRG.10410	bsx
14558	dd_Smes_g4_172	11377	11385	BSX_MA0876.1	7.35507	-	dd_Smes_g4_172	9473	11474	18.4634	1	MSTRG.10410	bsx
14569	dd_Smes_g4_172	884587	884595	BSX_MA0876.1	7.66135	+	dd_Smes_g4_172	878072	888187	7.55086	1	MSTRG.10410	bsx
14572	dd_Smes_g4_172	893874	893882	BSX_MA0876.1	7.66135	+	dd_Smes_g4_172	892832	895000	8.72495	1	MSTRG.10410	bsx
14575	dd_Smes_g4_172	1146505	1146513	BSX_MA0876.1	7.76311	-	dd_Smes_g4_172	1145202	1151492	8.25846	1	MSTRG.10410	bsx
14592	dd_Smes_g4_175	683386	683394	BSX_MA0876.1	7.33512	+	dd_Smes_g4_175	682414	684415	7.47025	1	MSTRG.10410	bsx
14687	dd_Smes_g4_2	9726562	9726570	BSX_MA0876.1	7.76311	+	dd_Smes_g4_2	9725091	9727300	7.52694	1	MSTRG.10410	bsx
14732	dd_Smes_g4_205	415697	415705	BSX_MA0876.1	7.24552	-	dd_Smes_g4_205	415341	417342	8.31587	1	MSTRG.10410	bsx
14787	dd_Smes_g4_231	407935	407943	BSX_MA0876.1	7.76311	+	dd_Smes_g4_231	406859	411405	8.31617	1	MSTRG.10410	bsx
14790	dd_Smes_g4_231	448938	448946	BSX_MA0876.1	7.22557	-	dd_Smes_g4_231	447492	449493	7.93739	1	MSTRG.10410	bsx
14795	dd_Smes_g4_232	77760	77768	BSX_MA0876.1	7.76311	+	dd_Smes_g4_232	75777	77778	8.63719	1	MSTRG.10410	bsx
14801	dd_Smes_g4_232	526744	526752	BSX_MA0876.1	7.76311	-	dd_Smes_g4_232	525341	527342	8.02407	1	MSTRG.10410	bsx
14827	dd_Smes_g4_245	163955	163963	BSX_MA0876.1	7.35507	-	dd_Smes_g4_245	162341	164491	8.25332	1	MSTRG.10410	bsx
14860	dd_Smes_g4_262	101868	101876	BSX_MA0876.1	7.33512	+	dd_Smes_g4_262	101672	104853	7.50465	1	MSTRG.10410	bsx
14867	dd_Smes_g4_265	253595	253603	BSX_MA0876.1	7.66135	-	dd_Smes_g4_265	251808	253809	8.88063	1	MSTRG.10410	bsx
14871	dd_Smes_g4_265	312155	312163	BSX_MA0876.1	7.6414	+	dd_Smes_g4_265	311281	313334	7.94341	1	MSTRG.10410	bsx
14878	dd_Smes_g4_265	497432	497440	BSX_MA0876.1	7.33512	+	dd_Smes_g4_265	494677	498996	10.0591	1	MSTRG.10410	bsx
14882	dd_Smes_g4_265	571522	571530	BSX_MA0876.1	7.33512	+	dd_Smes_g4_265	570177	572178	7.68119	1	MSTRG.10410	bsx
14911	dd_Smes_g4_29	1796632	1796640	BSX_MA0876.1	7.35507	+	dd_Smes_g4_29	1794818	1796819	7.93355	1	MSTRG.10410	bsx
14918	dd_Smes_g4_29	2302080	2302088	BSX_MA0876.1	7.22557	+	dd_Smes_g4_29	2301154	2303155	7.97159	1	MSTRG.10410	bsx
14977	dd_Smes_g4_31	3744834	3744842	BSX_MA0876.1	7.22557	-	dd_Smes_g4_31	3742976	3747666	7.46594	1	MSTRG.10410	bsx
14981	dd_Smes_g4_31	4390243	4390251	BSX_MA0876.1	7.35507	-	dd_Smes_g4_31	4389148	4391149	7.70117	1	MSTRG.10410	bsx
15011	dd_Smes_g4_354	9773	9781	BSX_MA0876.1	7.33512	-	dd_Smes_g4_354	8039	10040	9.39371	1	MSTRG.10410	bsx
15012	dd_Smes_g4_36	1487981	1487989	BSX_MA0876.1	7.33512	-	dd_Smes_g4_36	1487559	1489560	10.576	1	MSTRG.10410	bsx
15037	dd_Smes_g4_37	3013207	3013215	BSX_MA0876.1	7.24552	+	dd_Smes_g4_37	3010441	3017220	7.64105	1	MSTRG.10410	bsx
15047	dd_Smes_g4_37	3226386	3226394	BSX_MA0876.1	7.12381	+	dd_Smes_g4_37	3223866	3227332	7.65033	1	MSTRG.10410	bsx
15048	dd_Smes_g4_37	3603081	3603089	BSX_MA0876.1	7.6414	+	dd_Smes_g4_37	3602214	3604481	9.04831	1	MSTRG.10410	bsx
15054	dd_Smes_g4_37	4695287	4695295	BSX_MA0876.1	7.76311	-	dd_Smes_g4_37	4694420	4696421	7.45237	1	MSTRG.10410	bsx
15055	dd_Smes_g4_37	4696316	4696324	BSX_MA0876.1	7.24552	+	dd_Smes_g4_37	4694420	4696421	16.1482	1	MSTRG.10410	bsx
15064	dd_Smes_g4_38	4631210	4631218	BSX_MA0876.1	7.66135	-	dd_Smes_g4_38	4626523	4633586	7.56013	1	MSTRG.10410	bsx
15078	dd_Smes_g4_4	4501941	4501949	BSX_MA0876.1	7.33512	-	dd_Smes_g4_4	4499941	4503058	8.05822	1	MSTRG.10410	bsx
15079	dd_Smes_g4_4	4501952	4501960	BSX_MA0876.1	7.33512	-	dd_Smes_g4_4	4499941	4503058	8.05822	1	MSTRG.10410	bsx
15095	dd_Smes_g4_4	10379166	10379174	BSX_MA0876.1	7.66135	+	dd_Smes_g4_4	10378904	10380905	7.82575	1	MSTRG.10410	bsx
15101	dd_Smes_g4_4	12518845	12518853	BSX_MA0876.1	7.66135	-	dd_Smes_g4_4	12517132	12519133	8.24002	1	MSTRG.10410	bsx
15137	dd_Smes_g4_44	96726	96734	BSX_MA0876.1	7.22557	+	dd_Smes_g4_44	96532	98533	7.53491	1	MSTRG.10410	bsx
15140	dd_Smes_g4_44	3132311	3132319	BSX_MA0876.1	7.33512	+	dd_Smes_g4_44	3130747	3133648	8.61003	1	MSTRG.10410	bsx
15182	dd_Smes_g4_5	9182828	9182836	BSX_MA0876.1	7.12381	-	dd_Smes_g4_5	9179200	9183143	9.49642	1	MSTRG.10410	bsx
15190	dd_Smes_g4_50	642348	642356	BSX_MA0876.1	7.22557	-	dd_Smes_g4_50	641648	643649	9.692	1	MSTRG.10410	bsx
15251	dd_Smes_g4_57	2949865	2949873	BSX_MA0876.1	7.12381	+	dd_Smes_g4_57	2948820	2950821	8.30776	1	MSTRG.10410	bsx
15276	dd_Smes_g4_6	7365985	7365993	BSX_MA0876.1	7.24552	+	dd_Smes_g4_6	7365039	7367040	9.03642	1	MSTRG.10410	bsx
15282	dd_Smes_g4_6	10313494	10313502	BSX_MA0876.1	7.35507	-	dd_Smes_g4_6	10313263	10315264	7.85936	1	MSTRG.10410	bsx
15307	dd_Smes_g4_64	1533609	1533617	BSX_MA0876.1	7.33512	-	dd_Smes_g4_64	1531804	1533805	8.06115	1	MSTRG.10410	bsx
15326	dd_Smes_g4_67	1472811	1472819	BSX_MA0876.1	7.78307	-	dd_Smes_g4_67	1471111	1473809	7.77922	1	MSTRG.10410	bsx
15328	dd_Smes_g4_68	421852	421860	BSX_MA0876.1	7.33512	-	dd_Smes_g4_68	421293	423466	7.72493	1	MSTRG.10410	bsx
15356	dd_Smes_g4_70	1170668	1170676	BSX_MA0876.1	7.35507	+	dd_Smes_g4_70	1168980	1172645	7.97322	1	MSTRG.10410	bsx
15385	dd_Smes_g4_76	2503604	2503612	BSX_MA0876.1	7.78307	+	dd_Smes_g4_76	2503447	2506090	8.16336	1	MSTRG.10410	bsx
15398	dd_Smes_g4_78	2574712	2574720	BSX_MA0876.1	7.6414	+	dd_Smes_g4_78	2573713	2575714	11.3643	1	MSTRG.10410	bsx
15492	dd_Smes_g4_91	323269	323277	BSX_MA0876.1	7.33512	+	dd_Smes_g4_91	322950	327001	10.1503	1	MSTRG.10410	bsx
15501	dd_Smes_g4_94	1958297	1958305	BSX_MA0876.1	7.35507	-	dd_Smes_g4_94	1956166	1958971	7.61002	1	MSTRG.10410	bsx
15505	dd_Smes_g4_94	2191351	2191359	BSX_MA0876.1	7.35507	+	dd_Smes_g4_94	2190289	2193585	9.21332	1	MSTRG.10410	bsx
15531	dd_Smes_g4_1	2151167	2151177	Barhl1_MA0877.1	7.5669	-	dd_Smes_g4_1	2150212	2152213	7.51559	1	SMESG000022963.1	barhl1
15573	dd_Smes_g4_1	15885949	15885959	Barhl1_MA0877.1	6.99372	+	dd_Smes_g4_1	15883980	15885981	8.67375	1	SMESG000022963.1	barhl1
15588	dd_Smes_g4_10	7288135	7288145	Barhl1_MA0877.1	7.71616	-	dd_Smes_g4_10	7286399	7289582	9.84099	1	SMESG000022963.1	barhl1
15592	dd_Smes_g4_100	2225371	2225381	Barhl1_MA0877.1	6.69174	-	dd_Smes_g4_100	2224244	2226245	7.62249	1	SMESG000022963.1	barhl1
15596	dd_Smes_g4_103	400287	400297	Barhl1_MA0877.1	6.6808	+	dd_Smes_g4_103	399399	401400	7.54704	1	SMESG000022963.1	barhl1
15637	dd_Smes_g4_110	485307	485317	Barhl1_MA0877.1	8.37728	+	dd_Smes_g4_110	483532	485533	8.47154	1	SMESG000022963.1	barhl1
15641	dd_Smes_g4_110	1486441	1486451	Barhl1_MA0877.1	7.20166	-	dd_Smes_g4_110	1486216	1489832	8.01115	1	SMESG000022963.1	barhl1
15642	dd_Smes_g4_110	1486910	1486920	Barhl1_MA0877.1	6.99372	+	dd_Smes_g4_110	1486216	1489832	8.81193	1	SMESG000022963.1	barhl1
15672	dd_Smes_g4_116	922369	922379	Barhl1_MA0877.1	6.66643	+	dd_Smes_g4_116	922356	924357	10.2816	1	SMESG000022963.1	barhl1
15690	dd_Smes_g4_12	893911	893921	Barhl1_MA0877.1	7.50996	+	dd_Smes_g4_12	892042	894043	8.29105	1	SMESG000022963.1	barhl1
15714	dd_Smes_g4_127	1868194	1868204	Barhl1_MA0877.1	7.59827	+	dd_Smes_g4_127	1867600	1869601	7.57383	1	SMESG000022963.1	barhl1
15721	dd_Smes_g4_128	1408249	1408259	Barhl1_MA0877.1	6.68488	+	dd_Smes_g4_128	1406634	1411272	7.78282	1	SMESG000022963.1	barhl1
15725	dd_Smes_g4_129	322855	322865	Barhl1_MA0877.1	6.63048	+	dd_Smes_g4_129	321945	323946	7.48589	1	SMESG000022963.1	barhl1
15777	dd_Smes_g4_133	1427238	1427248	Barhl1_MA0877.1	6.66663	-	dd_Smes_g4_133	1426901	1428902	7.51028	1	SMESG000022963.1	barhl1
15778	dd_Smes_g4_133	1454941	1454951	Barhl1_MA0877.1	6.7705	-	dd_Smes_g4_133	1453547	1455646	7.39724	1	SMESG000022963.1	barhl1
15780	dd_Smes_g4_133	1556942	1556952	Barhl1_MA0877.1	6.93579	-	dd_Smes_g4_133	1555855	1557856	8.32191	1	SMESG000022963.1	barhl1
15800	dd_Smes_g4_138	154561	154571	Barhl1_MA0877.1	7.75588	+	dd_Smes_g4_138	153494	155495	7.8668	1	SMESG000022963.1	barhl1
15828	dd_Smes_g4_14	7782095	7782105	Barhl1_MA0877.1	6.71099	-	dd_Smes_g4_14	7780952	7782953	8.22092	1	SMESG000022963.1	barhl1
15847	dd_Smes_g4_145	646994	647004	Barhl1_MA0877.1	7.85327	-	dd_Smes_g4_145	646535	648536	7.56894	1	SMESG000022963.1	barhl1
15893	dd_Smes_g4_15	5820343	5820353	Barhl1_MA0877.1	7.07363	+	dd_Smes_g4_15	5819026	5821446	9.15335	1	SMESG000022963.1	barhl1
15900	dd_Smes_g4_15	6213888	6213898	Barhl1_MA0877.1	6.96793	-	dd_Smes_g4_15	6212383	6214384	8.44049	1	SMESG000022963.1	barhl1
15938	dd_Smes_g4_157	312961	312971	Barhl1_MA0877.1	7.45047	+	dd_Smes_g4_157	311794	313965	9.99741	1	SMESG000022963.1	barhl1
15969	dd_Smes_g4_157	1472623	1472633	Barhl1_MA0877.1	7.20166	-	dd_Smes_g4_157	1471581	1473582	8.4482	1	SMESG000022963.1	barhl1
16028	dd_Smes_g4_172	893873	893883	Barhl1_MA0877.1	6.70065	-	dd_Smes_g4_172	892832	895000	8.72495	1	SMESG000022963.1	barhl1
16031	dd_Smes_g4_172	1146504	1146514	Barhl1_MA0877.1	6.83709	+	dd_Smes_g4_172	1145202	1151492	8.25846	1	SMESG000022963.1	barhl1
16085	dd_Smes_g4_186	100314	100324	Barhl1_MA0877.1	7.83417	+	dd_Smes_g4_186	99012	101013	7.74797	1	SMESG000022963.1	barhl1
16089	dd_Smes_g4_186	923415	923425	Barhl1_MA0877.1	6.6808	+	dd_Smes_g4_186	921000	925162	7.60429	1	SMESG000022963.1	barhl1
16203	dd_Smes_g4_205	415696	415706	Barhl1_MA0877.1	7.59827	+	dd_Smes_g4_205	415341	417342	8.31587	1	SMESG000022963.1	barhl1
16281	dd_Smes_g4_232	415338	415348	Barhl1_MA0877.1	6.93331	-	dd_Smes_g4_232	414171	416521	9.7379	1	SMESG000022963.1	barhl1
16282	dd_Smes_g4_232	417705	417715	Barhl1_MA0877.1	6.57122	-	dd_Smes_g4_232	417051	419052	12.2707	1	SMESG000022963.1	barhl1
16283	dd_Smes_g4_232	494073	494083	Barhl1_MA0877.1	6.82153	-	dd_Smes_g4_232	493017	495018	7.631	1	SMESG000022963.1	barhl1
16285	dd_Smes_g4_232	526743	526753	Barhl1_MA0877.1	6.56982	+	dd_Smes_g4_232	525341	527342	8.02407	1	SMESG000022963.1	barhl1
16315	dd_Smes_g4_245	163954	163964	Barhl1_MA0877.1	7.9925	+	dd_Smes_g4_245	162341	164491	8.25332	1	SMESG000022963.1	barhl1
16320	dd_Smes_g4_246	444170	444180	Barhl1_MA0877.1	7.83525	+	dd_Smes_g4_246	442812	444813	7.77781	1	SMESG000022963.1	barhl1
16344	dd_Smes_g4_257	485589	485599	Barhl1_MA0877.1	6.82799	+	dd_Smes_g4_257	484289	486290	12.2895	1	SMESG000022963.1	barhl1
16367	dd_Smes_g4_265	247968	247978	Barhl1_MA0877.1	6.66626	-	dd_Smes_g4_265	247342	249343	7.40924	1	SMESG000022963.1	barhl1
16369	dd_Smes_g4_265	256841	256851	Barhl1_MA0877.1	6.83593	+	dd_Smes_g4_265	255462	257463	7.76864	1	SMESG000022963.1	barhl1
16374	dd_Smes_g4_265	312154	312164	Barhl1_MA0877.1	6.60954	-	dd_Smes_g4_265	311281	313334	7.94341	1	SMESG000022963.1	barhl1
16381	dd_Smes_g4_265	497431	497441	Barhl1_MA0877.1	7.09208	-	dd_Smes_g4_265	494677	498996	10.0591	1	SMESG000022963.1	barhl1
16417	dd_Smes_g4_29	1796631	1796641	Barhl1_MA0877.1	7.47643	-	dd_Smes_g4_29	1794818	1796819	7.93355	1	SMESG000022963.1	barhl1
16434	dd_Smes_g4_297	134149	134159	Barhl1_MA0877.1	7.18256	-	dd_Smes_g4_297	126643	134885	7.50478	1	SMESG000022963.1	barhl1
16437	dd_Smes_g4_298	95492	95502	Barhl1_MA0877.1	6.79445	-	dd_Smes_g4_298	94854	96855	10.6206	1	SMESG000022963.1	barhl1
16522	dd_Smes_g4_36	1487914	1487924	Barhl1_MA0877.1	7.18321	+	dd_Smes_g4_36	1487559	1489560	8.83822	1	SMESG000022963.1	barhl1
16558	dd_Smes_g4_37	3226385	3226395	Barhl1_MA0877.1	6.81022	-	dd_Smes_g4_37	3223866	3227332	7.65033	1	SMESG000022963.1	barhl1
16563	dd_Smes_g4_37	4649090	4649100	Barhl1_MA0877.1	6.82622	+	dd_Smes_g4_37	4645956	4650730	8.00721	1	SMESG000022963.1	barhl1
16564	dd_Smes_g4_37	4667640	4667650	Barhl1_MA0877.1	6.66853	-	dd_Smes_g4_37	4666271	4668272	8.18693	1	SMESG000022963.1	barhl1
16571	dd_Smes_g4_38	4629061	4629071	Barhl1_MA0877.1	7.56798	+	dd_Smes_g4_38	4626523	4633586	7.43191	1	SMESG000022963.1	barhl1
16588	dd_Smes_g4_4	4211716	4211726	Barhl1_MA0877.1	8.10208	-	dd_Smes_g4_4	4210095	4212096	7.45698	1	SMESG000022963.1	barhl1
16614	dd_Smes_g4_4	12518844	12518854	Barhl1_MA0877.1	6.70065	+	dd_Smes_g4_4	12517132	12519133	8.24002	1	SMESG000022963.1	barhl1
16648	dd_Smes_g4_43	2387709	2387719	Barhl1_MA0877.1	7.07003	-	dd_Smes_g4_43	2385602	2388740	10.6015	1	SMESG000022963.1	barhl1
16654	dd_Smes_g4_44	96725	96735	Barhl1_MA0877.1	6.92821	-	dd_Smes_g4_44	96532	98533	7.53491	1	SMESG000022963.1	barhl1
16657	dd_Smes_g4_44	3132310	3132320	Barhl1_MA0877.1	7.09208	-	dd_Smes_g4_44	3130747	3133648	8.61003	1	SMESG000022963.1	barhl1
16671	dd_Smes_g4_47	2376231	2376241	Barhl1_MA0877.1	8.21959	-	dd_Smes_g4_47	2374451	2376452	9.59676	1	SMESG000022963.1	barhl1
16686	dd_Smes_g4_49	2746973	2746983	Barhl1_MA0877.1	7.33981	-	dd_Smes_g4_49	2746303	2748304	7.59801	1	SMESG000022963.1	barhl1
16691	dd_Smes_g4_5	8484086	8484096	Barhl1_MA0877.1	7.35163	-	dd_Smes_g4_5	8483233	8485234	9.84706	1	SMESG000022963.1	barhl1
16695	dd_Smes_g4_5	9182827	9182837	Barhl1_MA0877.1	7.61954	+	dd_Smes_g4_5	9179200	9183143	9.49642	1	SMESG000022963.1	barhl1
16699	dd_Smes_g4_5	9186958	9186968	Barhl1_MA0877.1	8.10208	-	dd_Smes_g4_5	9184801	9189613	7.45095	1	SMESG000022963.1	barhl1
16783	dd_Smes_g4_57	1759584	1759594	Barhl1_MA0877.1	6.776	+	dd_Smes_g4_57	1759172	1761173	9.76287	1	SMESG000022963.1	barhl1
16784	dd_Smes_g4_57	1782810	1782820	Barhl1_MA0877.1	7.71616	+	dd_Smes_g4_57	1782010	1784011	8.04553	1	SMESG000022963.1	barhl1
16790	dd_Smes_g4_57	2949864	2949874	Barhl1_MA0877.1	7.37073	-	dd_Smes_g4_57	2948820	2950821	8.30776	1	SMESG000022963.1	barhl1
16804	dd_Smes_g4_6	3674613	3674623	Barhl1_MA0877.1	6.79621	-	dd_Smes_g4_6	3673996	3675997	7.36907	1	SMESG000022963.1	barhl1
16857	dd_Smes_g4_67	1472810	1472820	Barhl1_MA0877.1	7.4887	+	dd_Smes_g4_67	1471111	1473809	7.77922	1	SMESG000022963.1	barhl1
16886	dd_Smes_g4_70	1170667	1170677	Barhl1_MA0877.1	7.9925	-	dd_Smes_g4_70	1168980	1172645	7.97322	1	SMESG000022963.1	barhl1
16928	dd_Smes_g4_76	2503603	2503613	Barhl1_MA0877.1	7.4887	-	dd_Smes_g4_76	2503447	2506090	8.16336	1	SMESG000022963.1	barhl1
16936	dd_Smes_g4_76	2617507	2617517	Barhl1_MA0877.1	6.6808	-	dd_Smes_g4_76	2615494	2618812	9.0134	1	SMESG000022963.1	barhl1
16947	dd_Smes_g4_77	2928388	2928398	Barhl1_MA0877.1	7.16078	-	dd_Smes_g4_77	2927233	2929234	7.44563	1	SMESG000022963.1	barhl1
17000	dd_Smes_g4_86	1882567	1882577	Barhl1_MA0877.1	6.99372	+	dd_Smes_g4_86	1882409	1884410	8.63266	1	SMESG000022963.1	barhl1
17055	dd_Smes_g4_93	500882	500892	Barhl1_MA0877.1	6.64716	+	dd_Smes_g4_93	499177	501879	10.5501	1	SMESG000022963.1	barhl1
17067	dd_Smes_g4_94	2316306	2316316	Barhl1_MA0877.1	7.4696	-	dd_Smes_g4_94	2315153	2317154	8.72627	1	SMESG000022963.1	barhl1
17099	dd_Smes_g4_1	3173831	3173845	Bcl6_MA0463.1	8.89516	-	dd_Smes_g4_1	3173694	3175695	7.39146	1	MSTRG.1217:MSTRG.4483:MSTRG.17936	egr-5:znf362:zf-4
17103	dd_Smes_g4_1	4012991	4013005	Bcl6_MA0463.1	6.95765	-	dd_Smes_g4_1	4011925	4013926	7.75623	1	MSTRG.1217:MSTRG.4483:MSTRG.17936	egr-5:znf362:zf-4
17127	dd_Smes_g4_1	11250179	11250193	Bcl6_MA0463.1	7.62232	-	dd_Smes_g4_1	11249383	11251384	9.70912	1	MSTRG.1217:MSTRG.4483:MSTRG.17936	egr-5:znf362:zf-4
17137	dd_Smes_g4_1	13784400	13784414	Bcl6_MA0463.1	7.44537	-	dd_Smes_g4_1	13782845	13784846	8.27988	1	MSTRG.1217:MSTRG.4483:MSTRG.17936	egr-5:znf362:zf-4
17145	dd_Smes_g4_1	15544402	15544416	Bcl6_MA0463.1	6.99986	+	dd_Smes_g4_1	15543915	15546411	8.07814	1	MSTRG.1217:MSTRG.4483:MSTRG.17936	egr-5:znf362:zf-4
17149	dd_Smes_g4_1	16127723	16127737	Bcl6_MA0463.1	7.3559	-	dd_Smes_g4_1	16125715	16128211	7.59363	1	MSTRG.1217:MSTRG.4483:MSTRG.17936	egr-5:znf362:zf-4
17158	dd_Smes_g4_10	2440053	2440067	Bcl6_MA0463.1	8.4608	+	dd_Smes_g4_10	2438818	2440819	7.45557	1	MSTRG.1217:MSTRG.4483:MSTRG.17936	egr-5:znf362:zf-4
17160	dd_Smes_g4_10	3132015	3132029	Bcl6_MA0463.1	8.2267	+	dd_Smes_g4_10	3131925	3134028	8.45039	1	MSTRG.1217:MSTRG.4483:MSTRG.17936	egr-5:znf362:zf-4
17187	dd_Smes_g4_103	400319	400333	Bcl6_MA0463.1	7.20565	-	dd_Smes_g4_103	399399	401400	7.95747	1	MSTRG.1217:MSTRG.4483:MSTRG.17936	egr-5:znf362:zf-4
17197	dd_Smes_g4_106	331175	331189	Bcl6_MA0463.1	8.95404	-	dd_Smes_g4_106	329774	331775	7.67755	1	MSTRG.1217:MSTRG.4483:MSTRG.17936	egr-5:znf362:zf-4
17216	dd_Smes_g4_109	2110776	2110790	Bcl6_MA0463.1	7.63394	-	dd_Smes_g4_109	2109339	2111340	10.2624	1	MSTRG.1217:MSTRG.4483:MSTRG.17936	egr-5:znf362:zf-4
17255	dd_Smes_g4_110	1476234	1476248	Bcl6_MA0463.1	6.82696	-	dd_Smes_g4_110	1474406	1476407	7.37792	1	MSTRG.1217:MSTRG.4483:MSTRG.17936	egr-5:znf362:zf-4
17271	dd_Smes_g4_112	937221	937235	Bcl6_MA0463.1	6.99142	+	dd_Smes_g4_112	935661	938503	9.07105	1	MSTRG.1217:MSTRG.4483:MSTRG.17936	egr-5:znf362:zf-4
17285	dd_Smes_g4_114	1577404	1577418	Bcl6_MA0463.1	7.64074	-	dd_Smes_g4_114	1575839	1577840	9.18928	1	MSTRG.1217:MSTRG.4483:MSTRG.17936	egr-5:znf362:zf-4
17290	dd_Smes_g4_116	731344	731358	Bcl6_MA0463.1	11.1447	-	dd_Smes_g4_116	729840	731841	7.64632	1	MSTRG.1217:MSTRG.4483:MSTRG.17936	egr-5:znf362:zf-4
17308	dd_Smes_g4_117	1302760	1302774	Bcl6_MA0463.1	7.69368	-	dd_Smes_g4_117	1301468	1303469	7.63612	1	MSTRG.1217:MSTRG.4483:MSTRG.17936	egr-5:znf362:zf-4
17345	dd_Smes_g4_12	8178556	8178570	Bcl6_MA0463.1	6.83664	-	dd_Smes_g4_12	8177820	8179821	7.62246	1	MSTRG.1217:MSTRG.4483:MSTRG.17936	egr-5:znf362:zf-4
17346	dd_Smes_g4_12	8178922	8178936	Bcl6_MA0463.1	7.62053	+	dd_Smes_g4_12	8177820	8179821	8.20498	1	MSTRG.1217:MSTRG.4483:MSTRG.17936	egr-5:znf362:zf-4
17360	dd_Smes_g4_125	1047729	1047743	Bcl6_MA0463.1	7.15309	+	dd_Smes_g4_125	1046158	1050405	7.75925	1	MSTRG.1217:MSTRG.4483:MSTRG.17936	egr-5:znf362:zf-4
17379	dd_Smes_g4_129	341215	341229	Bcl6_MA0463.1	6.97859	-	dd_Smes_g4_129	339375	341376	7.69576	1	MSTRG.1217:MSTRG.4483:MSTRG.17936	egr-5:znf362:zf-4
17446	dd_Smes_g4_131	1685519	1685533	Bcl6_MA0463.1	6.76647	+	dd_Smes_g4_131	1684914	1687289	7.79335	1	MSTRG.1217:MSTRG.4483:MSTRG.17936	egr-5:znf362:zf-4
17447	dd_Smes_g4_131	1686281	1686295	Bcl6_MA0463.1	7.86546	+	dd_Smes_g4_131	1684914	1687289	7.95094	1	MSTRG.1217:MSTRG.4483:MSTRG.17936	egr-5:znf362:zf-4
17448	dd_Smes_g4_131	1686467	1686481	Bcl6_MA0463.1	7.25993	+	dd_Smes_g4_131	1684914	1687289	10.9263	1	MSTRG.1217:MSTRG.4483:MSTRG.17936	egr-5:znf362:zf-4
17491	dd_Smes_g4_134	1214249	1214263	Bcl6_MA0463.1	6.83293	-	dd_Smes_g4_134	1213092	1215093	7.92563	1	MSTRG.1217:MSTRG.4483:MSTRG.17936	egr-5:znf362:zf-4
17559	dd_Smes_g4_14	5938897	5938911	Bcl6_MA0463.1	7.71733	+	dd_Smes_g4_14	5937151	5939152	8.54037	1	MSTRG.1217:MSTRG.4483:MSTRG.17936	egr-5:znf362:zf-4
17560	dd_Smes_g4_14	6017124	6017138	Bcl6_MA0463.1	7.42371	+	dd_Smes_g4_14	6015358	6017545	8.51432	1	MSTRG.1217:MSTRG.4483:MSTRG.17936	egr-5:znf362:zf-4
17571	dd_Smes_g4_141	1383908	1383922	Bcl6_MA0463.1	7.95727	-	dd_Smes_g4_141	1383605	1385771	8.2258	1	MSTRG.1217:MSTRG.4483:MSTRG.17936	egr-5:znf362:zf-4
17593	dd_Smes_g4_145	1190561	1190575	Bcl6_MA0463.1	10.4466	+	dd_Smes_g4_145	1189584	1191585	7.70195	1	MSTRG.1217:MSTRG.4483:MSTRG.17936	egr-5:znf362:zf-4
17596	dd_Smes_g4_145	1194755	1194769	Bcl6_MA0463.1	7.28323	+	dd_Smes_g4_145	1193687	1195688	7.4294	1	MSTRG.1217:MSTRG.4483:MSTRG.17936	egr-5:znf362:zf-4
17624	dd_Smes_g4_15	2427028	2427042	Bcl6_MA0463.1	10.6854	+	dd_Smes_g4_15	2425750	2427806	7.47604	1	MSTRG.1217:MSTRG.4483:MSTRG.17936	egr-5:znf362:zf-4
17630	dd_Smes_g4_15	3264366	3264380	Bcl6_MA0463.1	7.64441	-	dd_Smes_g4_15	3262758	3265761	8.44286	1	MSTRG.1217:MSTRG.4483:MSTRG.17936	egr-5:znf362:zf-4
17638	dd_Smes_g4_15	3967514	3967528	Bcl6_MA0463.1	10.4704	+	dd_Smes_g4_15	3967050	3969051	8.55227	1	MSTRG.1217:MSTRG.4483:MSTRG.17936	egr-5:znf362:zf-4
17640	dd_Smes_g4_15	4487084	4487098	Bcl6_MA0463.1	8.31215	+	dd_Smes_g4_15	4486621	4488622	8.15838	1	MSTRG.1217:MSTRG.4483:MSTRG.17936	egr-5:znf362:zf-4
17655	dd_Smes_g4_15	5347036	5347050	Bcl6_MA0463.1	8.44144	-	dd_Smes_g4_15	5345975	5349549	7.88637	1	MSTRG.1217:MSTRG.4483:MSTRG.17936	egr-5:znf362:zf-4
17691	dd_Smes_g4_15	7630064	7630078	Bcl6_MA0463.1	6.80387	-	dd_Smes_g4_15	7628502	7630503	8.38365	1	MSTRG.1217:MSTRG.4483:MSTRG.17936	egr-5:znf362:zf-4
17696	dd_Smes_g4_15	7792295	7792309	Bcl6_MA0463.1	9.08137	-	dd_Smes_g4_15	7791332	7793333	7.65102	1	MSTRG.1217:MSTRG.4483:MSTRG.17936	egr-5:znf362:zf-4
17841	dd_Smes_g4_172	184825	184839	Bcl6_MA0463.1	7.01183	-	dd_Smes_g4_172	184110	186111	7.57825	1	MSTRG.1217:MSTRG.4483:MSTRG.17936	egr-5:znf362:zf-4
17853	dd_Smes_g4_172	885349	885363	Bcl6_MA0463.1	8.36671	-	dd_Smes_g4_172	878072	888187	7.60422	1	MSTRG.1217:MSTRG.4483:MSTRG.17936	egr-5:znf362:zf-4
17854	dd_Smes_g4_172	887090	887104	Bcl6_MA0463.1	7.50289	-	dd_Smes_g4_172	878072	888187	8.24916	1	MSTRG.1217:MSTRG.4483:MSTRG.17936	egr-5:znf362:zf-4
17920	dd_Smes_g4_18	4438408	4438422	Bcl6_MA0463.1	7.95744	+	dd_Smes_g4_18	4437293	4439294	7.36715	1	MSTRG.1217:MSTRG.4483:MSTRG.17936	egr-5:znf362:zf-4
17980	dd_Smes_g4_188	621852	621866	Bcl6_MA0463.1	8.0538	+	dd_Smes_g4_188	620836	622837	7.89638	1	MSTRG.1217:MSTRG.4483:MSTRG.17936	egr-5:znf362:zf-4
17997	dd_Smes_g4_189	874059	874073	Bcl6_MA0463.1	9.33371	-	dd_Smes_g4_189	871160	874452	10.2227	1	MSTRG.1217:MSTRG.4483:MSTRG.17936	egr-5:znf362:zf-4
18103	dd_Smes_g4_2	15745896	15745910	Bcl6_MA0463.1	6.79738	-	dd_Smes_g4_2	15744535	15746536	7.3828	1	MSTRG.1217:MSTRG.4483:MSTRG.17936	egr-5:znf362:zf-4
18159	dd_Smes_g4_21	895060	895074	Bcl6_MA0463.1	7.53947	-	dd_Smes_g4_21	893312	895950	8.60537	1	MSTRG.1217:MSTRG.4483:MSTRG.17936	egr-5:znf362:zf-4
18236	dd_Smes_g4_23	468916	468930	Bcl6_MA0463.1	8.63809	+	dd_Smes_g4_23	467815	469816	9.62935	1	MSTRG.1217:MSTRG.4483:MSTRG.17936	egr-5:znf362:zf-4
18266	dd_Smes_g4_232	81352	81366	Bcl6_MA0463.1	7.45546	-	dd_Smes_g4_232	79545	81851	7.97605	1	MSTRG.1217:MSTRG.4483:MSTRG.17936	egr-5:znf362:zf-4
18272	dd_Smes_g4_232	414861	414875	Bcl6_MA0463.1	8.03312	+	dd_Smes_g4_232	414171	416521	9.30124	1	MSTRG.1217:MSTRG.4483:MSTRG.17936	egr-5:znf362:zf-4
18273	dd_Smes_g4_232	417885	417899	Bcl6_MA0463.1	9.57545	+	dd_Smes_g4_232	417051	419052	9.04854	1	MSTRG.1217:MSTRG.4483:MSTRG.17936	egr-5:znf362:zf-4
18274	dd_Smes_g4_232	417992	418006	Bcl6_MA0463.1	7.70319	+	dd_Smes_g4_232	417051	419052	9.25503	1	MSTRG.1217:MSTRG.4483:MSTRG.17936	egr-5:znf362:zf-4
18283	dd_Smes_g4_232	498975	498989	Bcl6_MA0463.1	7.43669	-	dd_Smes_g4_232	495426	499108	7.36873	1	MSTRG.1217:MSTRG.4483:MSTRG.17936	egr-5:znf362:zf-4
18341	dd_Smes_g4_257	121072	121086	Bcl6_MA0463.1	6.85703	-	dd_Smes_g4_257	119420	121490	8.0631	1	MSTRG.1217:MSTRG.4483:MSTRG.17936	egr-5:znf362:zf-4
18342	dd_Smes_g4_257	151462	151476	Bcl6_MA0463.1	7.48578	-	dd_Smes_g4_257	151369	153370	7.63948	1	MSTRG.1217:MSTRG.4483:MSTRG.17936	egr-5:znf362:zf-4
18344	dd_Smes_g4_257	487599	487613	Bcl6_MA0463.1	7.90694	-	dd_Smes_g4_257	486765	488766	7.56747	1	MSTRG.1217:MSTRG.4483:MSTRG.17936	egr-5:znf362:zf-4
18359	dd_Smes_g4_26	4672821	4672835	Bcl6_MA0463.1	7.04786	-	dd_Smes_g4_26	4672166	4674167	9.71284	1	MSTRG.1217:MSTRG.4483:MSTRG.17936	egr-5:znf362:zf-4
18365	dd_Smes_g4_265	58909	58923	Bcl6_MA0463.1	8.03383	-	dd_Smes_g4_265	57533	59534	8.74145	1	MSTRG.1217:MSTRG.4483:MSTRG.17936	egr-5:znf362:zf-4
18377	dd_Smes_g4_265	336884	336898	Bcl6_MA0463.1	6.78387	-	dd_Smes_g4_265	335942	337943	8.19619	1	MSTRG.1217:MSTRG.4483:MSTRG.17936	egr-5:znf362:zf-4
18380	dd_Smes_g4_265	499850	499864	Bcl6_MA0463.1	8.06246	+	dd_Smes_g4_265	499740	501741	7.48157	1	MSTRG.1217:MSTRG.4483:MSTRG.17936	egr-5:znf362:zf-4
18434	dd_Smes_g4_29	2302358	2302372	Bcl6_MA0463.1	9.49401	+	dd_Smes_g4_29	2301154	2303155	7.97498	1	MSTRG.1217:MSTRG.4483:MSTRG.17936	egr-5:znf362:zf-4
18446	dd_Smes_g4_297	109408	109422	Bcl6_MA0463.1	6.93442	-	dd_Smes_g4_297	108282	110401	7.41279	1	MSTRG.1217:MSTRG.4483:MSTRG.17936	egr-5:znf362:zf-4
18469	dd_Smes_g4_3	3520490	3520504	Bcl6_MA0463.1	10.6473	+	dd_Smes_g4_3	3519590	3522037	7.96216	1	MSTRG.1217:MSTRG.4483:MSTRG.17936	egr-5:znf362:zf-4
18491	dd_Smes_g4_30	2155281	2155295	Bcl6_MA0463.1	7.22168	+	dd_Smes_g4_30	2154241	2156242	7.50751	1	MSTRG.1217:MSTRG.4483:MSTRG.17936	egr-5:znf362:zf-4
18610	dd_Smes_g4_37	4767778	4767792	Bcl6_MA0463.1	7.29826	-	dd_Smes_g4_37	4766656	4768657	7.83784	1	MSTRG.1217:MSTRG.4483:MSTRG.17936	egr-5:znf362:zf-4
18620	dd_Smes_g4_38	4616072	4616086	Bcl6_MA0463.1	8.05293	+	dd_Smes_g4_38	4615843	4617974	7.67139	1	MSTRG.1217:MSTRG.4483:MSTRG.17936	egr-5:znf362:zf-4
18638	dd_Smes_g4_39	4438326	4438340	Bcl6_MA0463.1	7.83928	+	dd_Smes_g4_39	4437566	4439567	7.47715	1	MSTRG.1217:MSTRG.4483:MSTRG.17936	egr-5:znf362:zf-4
18661	dd_Smes_g4_4	9605158	9605172	Bcl6_MA0463.1	8.45918	+	dd_Smes_g4_4	9603698	9609186	8.23718	1	MSTRG.1217:MSTRG.4483:MSTRG.17936	egr-5:znf362:zf-4
18663	dd_Smes_g4_4	9686134	9686148	Bcl6_MA0463.1	7.23817	+	dd_Smes_g4_4	9685045	9687046	7.62521	1	MSTRG.1217:MSTRG.4483:MSTRG.17936	egr-5:znf362:zf-4
18693	dd_Smes_g4_40	4423557	4423571	Bcl6_MA0463.1	9.73794	-	dd_Smes_g4_40	4422415	4424416	8.35509	1	MSTRG.1217:MSTRG.4483:MSTRG.17936	egr-5:znf362:zf-4
18696	dd_Smes_g4_41	784406	784420	Bcl6_MA0463.1	8.24274	+	dd_Smes_g4_41	784118	786119	7.43086	1	MSTRG.1217:MSTRG.4483:MSTRG.17936	egr-5:znf362:zf-4
18771	dd_Smes_g4_49	303717	303731	Bcl6_MA0463.1	6.89008	-	dd_Smes_g4_49	302520	304521	8.72707	1	MSTRG.1217:MSTRG.4483:MSTRG.17936	egr-5:znf362:zf-4
18791	dd_Smes_g4_5	9186697	9186711	Bcl6_MA0463.1	7.63188	-	dd_Smes_g4_5	9184801	9189613	7.60095	1	MSTRG.1217:MSTRG.4483:MSTRG.17936	egr-5:znf362:zf-4
18920	dd_Smes_g4_59	1827916	1827930	Bcl6_MA0463.1	8.13354	-	dd_Smes_g4_59	1826861	1828862	7.47909	1	MSTRG.1217:MSTRG.4483:MSTRG.17936	egr-5:znf362:zf-4
18986	dd_Smes_g4_63	2472970	2472984	Bcl6_MA0463.1	7.05786	-	dd_Smes_g4_63	2471981	2473982	9.69427	1	MSTRG.1217:MSTRG.4483:MSTRG.17936	egr-5:znf362:zf-4
18990	dd_Smes_g4_64	1533093	1533107	Bcl6_MA0463.1	7.13122	+	dd_Smes_g4_64	1531804	1533805	8.50913	1	MSTRG.1217:MSTRG.4483:MSTRG.17936	egr-5:znf362:zf-4
18994	dd_Smes_g4_64	1825236	1825250	Bcl6_MA0463.1	8.98982	-	dd_Smes_g4_64	1824191	1826192	7.92751	1	MSTRG.1217:MSTRG.4483:MSTRG.17936	egr-5:znf362:zf-4
19023	dd_Smes_g4_67	234089	234103	Bcl6_MA0463.1	7.15742	-	dd_Smes_g4_67	233188	235189	9.24278	1	MSTRG.1217:MSTRG.4483:MSTRG.17936	egr-5:znf362:zf-4
19050	dd_Smes_g4_7	2355201	2355215	Bcl6_MA0463.1	7.74028	-	dd_Smes_g4_7	2354291	2356849	37.8302	1	MSTRG.1217:MSTRG.4483:MSTRG.17936	egr-5:znf362:zf-4
19076	dd_Smes_g4_70	3202318	3202332	Bcl6_MA0463.1	8.80342	+	dd_Smes_g4_70	3200517	3202518	8.48496	1	MSTRG.1217:MSTRG.4483:MSTRG.17936	egr-5:znf362:zf-4
19119	dd_Smes_g4_76	2506726	2506740	Bcl6_MA0463.1	9.48088	+	dd_Smes_g4_76	2506529	2509173	7.40204	1	MSTRG.1217:MSTRG.4483:MSTRG.17936	egr-5:znf362:zf-4
19121	dd_Smes_g4_76	2520834	2520848	Bcl6_MA0463.1	9.27311	+	dd_Smes_g4_76	2518637	2521940	9.14493	1	MSTRG.1217:MSTRG.4483:MSTRG.17936	egr-5:znf362:zf-4
19123	dd_Smes_g4_76	2541936	2541950	Bcl6_MA0463.1	8.37161	-	dd_Smes_g4_76	2540949	2542950	8.65463	1	MSTRG.1217:MSTRG.4483:MSTRG.17936	egr-5:znf362:zf-4
19128	dd_Smes_g4_76	2848810	2848824	Bcl6_MA0463.1	9.15146	+	dd_Smes_g4_76	2848657	2850658	8.41595	1	MSTRG.1217:MSTRG.4483:MSTRG.17936	egr-5:znf362:zf-4
19134	dd_Smes_g4_77	803391	803405	Bcl6_MA0463.1	6.91288	-	dd_Smes_g4_77	802251	804679	7.48435	1	MSTRG.1217:MSTRG.4483:MSTRG.17936	egr-5:znf362:zf-4
19143	dd_Smes_g4_78	2186373	2186387	Bcl6_MA0463.1	7.07164	-	dd_Smes_g4_78	2185783	2187784	7.44548	1	MSTRG.1217:MSTRG.4483:MSTRG.17936	egr-5:znf362:zf-4
19146	dd_Smes_g4_78	2574820	2574834	Bcl6_MA0463.1	7.72521	-	dd_Smes_g4_78	2573713	2575714	7.81094	1	MSTRG.1217:MSTRG.4483:MSTRG.17936	egr-5:znf362:zf-4
19148	dd_Smes_g4_79	1113718	1113732	Bcl6_MA0463.1	9.57856	+	dd_Smes_g4_79	1112491	1114492	7.82636	1	MSTRG.1217:MSTRG.4483:MSTRG.17936	egr-5:znf362:zf-4
19186	dd_Smes_g4_83	601065	601079	Bcl6_MA0463.1	6.76496	+	dd_Smes_g4_83	597872	601272	7.73103	1	MSTRG.1217:MSTRG.4483:MSTRG.17936	egr-5:znf362:zf-4
19191	dd_Smes_g4_83	2403051	2403065	Bcl6_MA0463.1	7.03992	+	dd_Smes_g4_83	2401732	2407858	7.87302	1	MSTRG.1217:MSTRG.4483:MSTRG.17936	egr-5:znf362:zf-4
19287	dd_Smes_g4_93	500158	500172	Bcl6_MA0463.1	13.0361	-	dd_Smes_g4_93	499177	501879	9.79924	1	MSTRG.1217:MSTRG.4483:MSTRG.17936	egr-5:znf362:zf-4
19346	dd_Smes_g4_1	7548756	7548763	C15_MA0170.1	6.33015	+	dd_Smes_g4_1	7547260	7550328	7.78655	1	MSTRG.5414	tlx-1
19348	dd_Smes_g4_1	8090574	8090581	C15_MA0170.1	6.33015	-	dd_Smes_g4_1	8090032	8092033	7.53555	1	MSTRG.5414	tlx-1
19427	dd_Smes_g4_105	1815345	1815352	C15_MA0170.1	6.33015	+	dd_Smes_g4_105	1814564	1816565	7.46485	1	MSTRG.5414	tlx-1
19484	dd_Smes_g4_110	1487584	1487591	C15_MA0170.1	6.33015	+	dd_Smes_g4_110	1486216	1489832	8.78777	1	MSTRG.5414	tlx-1
19486	dd_Smes_g4_110	1605336	1605343	C15_MA0170.1	6.33015	-	dd_Smes_g4_110	1603714	1606680	7.62738	1	MSTRG.5414	tlx-1
19511	dd_Smes_g4_113	847811	847818	C15_MA0170.1	6.33015	+	dd_Smes_g4_113	846680	848681	7.67121	1	MSTRG.5414	tlx-1
19543	dd_Smes_g4_117	1302542	1302549	C15_MA0170.1	6.33015	+	dd_Smes_g4_117	1301468	1303469	9.12421	1	MSTRG.5414	tlx-1
19576	dd_Smes_g4_127	1868526	1868533	C15_MA0170.1	6.33015	+	dd_Smes_g4_127	1867600	1869601	7.72087	1	MSTRG.5414	tlx-1
19581	dd_Smes_g4_128	1408357	1408364	C15_MA0170.1	6.33015	-	dd_Smes_g4_128	1406634	1411272	8.21362	1	MSTRG.5414	tlx-1
19706	dd_Smes_g4_14	7222950	7222957	C15_MA0170.1	6.33015	+	dd_Smes_g4_14	7222479	7224480	9.85848	1	MSTRG.5414	tlx-1
19710	dd_Smes_g4_142	1034173	1034180	C15_MA0170.1	6.33015	+	dd_Smes_g4_142	1033975	1035976	8.57761	1	MSTRG.5414	tlx-1
19807	dd_Smes_g4_15	7392304	7392311	C15_MA0170.1	6.33015	+	dd_Smes_g4_15	7391276	7393277	7.40462	1	MSTRG.5414	tlx-1
19828	dd_Smes_g4_154	717828	717835	C15_MA0170.1	6.33015	+	dd_Smes_g4_154	716016	718017	7.7818	1	MSTRG.5414	tlx-1
19954	dd_Smes_g4_172	975191	975198	C15_MA0170.1	6.33015	-	dd_Smes_g4_172	972613	976453	8.33155	1	MSTRG.5414	tlx-1
20002	dd_Smes_g4_18	7125758	7125765	C15_MA0170.1	6.33015	+	dd_Smes_g4_18	7125523	7127979	9.33785	1	MSTRG.5414	tlx-1
20012	dd_Smes_g4_183	222763	222770	C15_MA0170.1	6.33015	+	dd_Smes_g4_183	221981	223982	7.9761	1	MSTRG.5414	tlx-1
20238	dd_Smes_g4_232	415311	415318	C15_MA0170.1	6.33015	-	dd_Smes_g4_232	414171	416521	7.39562	1	MSTRG.5414	tlx-1
20239	dd_Smes_g4_232	420605	420612	C15_MA0170.1	6.33015	-	dd_Smes_g4_232	419474	421475	10.3493	1	MSTRG.5414	tlx-1
20249	dd_Smes_g4_239	344413	344420	C15_MA0170.1	6.33015	+	dd_Smes_g4_239	342608	345027	9.94162	1	MSTRG.5414	tlx-1
20255	dd_Smes_g4_24	2133679	2133686	C15_MA0170.1	6.33015	+	dd_Smes_g4_24	2132331	2134332	8.53278	1	MSTRG.5414	tlx-1
20281	dd_Smes_g4_257	488198	488205	C15_MA0170.1	6.33015	-	dd_Smes_g4_257	486765	488766	8.27931	1	MSTRG.5414	tlx-1
20307	dd_Smes_g4_265	562419	562426	C15_MA0170.1	6.33015	+	dd_Smes_g4_265	561815	564725	8.46717	1	MSTRG.5414	tlx-1
20308	dd_Smes_g4_265	563602	563609	C15_MA0170.1	6.33015	-	dd_Smes_g4_265	561815	564725	7.56291	1	MSTRG.5414	tlx-1
20317	dd_Smes_g4_269	495856	495863	C15_MA0170.1	6.33015	+	dd_Smes_g4_269	494717	496829	7.46756	1	MSTRG.5414	tlx-1
20425	dd_Smes_g4_317	249119	249126	C15_MA0170.1	6.33015	+	dd_Smes_g4_317	249104	251105	8.19948	1	MSTRG.5414	tlx-1
20441	dd_Smes_g4_34	4127416	4127423	C15_MA0170.1	6.33015	-	dd_Smes_g4_34	4126465	4128466	8.44745	1	MSTRG.5414	tlx-1
20553	dd_Smes_g4_4	6817129	6817136	C15_MA0170.1	6.33015	-	dd_Smes_g4_4	6814452	6818026	9.2659	1	MSTRG.5414	tlx-1
20672	dd_Smes_g4_50	642257	642264	C15_MA0170.1	6.33015	-	dd_Smes_g4_50	641648	643649	7.39311	1	MSTRG.5414	tlx-1
20683	dd_Smes_g4_50	3030025	3030032	C15_MA0170.1	6.33015	-	dd_Smes_g4_50	3028167	3030168	8.2864	1	MSTRG.5414	tlx-1
20706	dd_Smes_g4_52	2627970	2627977	C15_MA0170.1	6.33015	+	dd_Smes_g4_52	2627040	2629041	9.11892	1	MSTRG.5414	tlx-1
20719	dd_Smes_g4_53	2351162	2351169	C15_MA0170.1	6.33015	+	dd_Smes_g4_53	2345424	2352507	7.49919	1	MSTRG.5414	tlx-1
20758	dd_Smes_g4_57	2351494	2351501	C15_MA0170.1	6.33015	+	dd_Smes_g4_57	2350879	2352880	7.97571	1	MSTRG.5414	tlx-1
20768	dd_Smes_g4_59	1380975	1380982	C15_MA0170.1	6.33015	-	dd_Smes_g4_59	1378073	1381410	7.56061	1	MSTRG.5414	tlx-1
20780	dd_Smes_g4_6	3674615	3674622	C15_MA0170.1	6.33015	-	dd_Smes_g4_6	3673996	3675997	7.36907	1	MSTRG.5414	tlx-1
20813	dd_Smes_g4_60	3276423	3276430	C15_MA0170.1	6.33015	-	dd_Smes_g4_60	3273252	3278168	8.04489	1	MSTRG.5414	tlx-1
21022	dd_Smes_g4_86	2442849	2442856	C15_MA0170.1	6.33015	+	dd_Smes_g4_86	2441614	2443873	8.00587	1	MSTRG.5414	tlx-1
21046	dd_Smes_g4_9	3073202	3073209	C15_MA0170.1	6.33015	+	dd_Smes_g4_9	3072346	3074347	7.48232	1	MSTRG.5414	tlx-1
21067	dd_Smes_g4_91	313647	313654	C15_MA0170.1	6.33015	-	dd_Smes_g4_91	309663	314777	8.24187	1	MSTRG.5414	tlx-1
21070	dd_Smes_g4_93	501038	501045	C15_MA0170.1	6.33015	-	dd_Smes_g4_93	499177	501879	9.31282	1	MSTRG.5414	tlx-1
21126	dd_Smes_g4_1	2911894	2911901	CG34031_MA0444.1	7.27146	+	dd_Smes_g4_1	2909301	2914441	9.04998	1	MSTRG.12684	nkx5-3
21283	dd_Smes_g4_10	3730643	3730650	CG34031_MA0444.1	7.27146	+	dd_Smes_g4_10	3730584	3732585	7.8923	1	MSTRG.12684	nkx5-3
21327	dd_Smes_g4_100	777980	777987	CG34031_MA0444.1	7.27146	+	dd_Smes_g4_100	776999	779000	9.26717	1	MSTRG.12684	nkx5-3
21350	dd_Smes_g4_102	1606736	1606743	CG34031_MA0444.1	7.27146	+	dd_Smes_g4_102	1605708	1607709	7.58845	1	MSTRG.12684	nkx5-3
21370	dd_Smes_g4_105	1815582	1815589	CG34031_MA0444.1	7.27146	+	dd_Smes_g4_105	1814564	1816565	7.6562	1	MSTRG.12684	nkx5-3
21424	dd_Smes_g4_109	2110708	2110715	CG34031_MA0444.1	7.27146	+	dd_Smes_g4_109	2109339	2111340	8.80154	1	MSTRG.12684	nkx5-3
21472	dd_Smes_g4_11	5439301	5439308	CG34031_MA0444.1	7.27146	-	dd_Smes_g4_11	5439289	5441290	8.25909	1	MSTRG.12684	nkx5-3
21495	dd_Smes_g4_110	193852	193859	CG34031_MA0444.1	7.27146	-	dd_Smes_g4_110	193322	195323	13.4657	1	MSTRG.12684	nkx5-3
21529	dd_Smes_g4_111	1496109	1496116	CG34031_MA0444.1	7.27146	-	dd_Smes_g4_111	1495416	1497417	7.6476	1	MSTRG.12684	nkx5-3
21532	dd_Smes_g4_112	935809	935816	CG34031_MA0444.1	7.27146	-	dd_Smes_g4_112	935661	938503	10.4621	1	MSTRG.12684	nkx5-3
21599	dd_Smes_g4_116	922370	922377	CG34031_MA0444.1	7.27146	+	dd_Smes_g4_116	922356	924357	10.2816	1	MSTRG.12684	nkx5-3
21722	dd_Smes_g4_12	7498754	7498761	CG34031_MA0444.1	7.27146	-	dd_Smes_g4_12	7498160	7500161	7.75703	1	MSTRG.12684	nkx5-3
21784	dd_Smes_g4_128	1408250	1408257	CG34031_MA0444.1	7.27146	+	dd_Smes_g4_128	1406634	1411272	7.78282	1	MSTRG.12684	nkx5-3
21856	dd_Smes_g4_13	5784420	5784427	CG34031_MA0444.1	7.27146	+	dd_Smes_g4_13	5783669	5785670	7.37227	1	MSTRG.12684	nkx5-3
21995	dd_Smes_g4_133	1557832	1557839	CG34031_MA0444.1	7.27146	+	dd_Smes_g4_133	1555855	1557856	9.02248	1	MSTRG.12684	nkx5-3
22011	dd_Smes_g4_134	656367	656374	CG34031_MA0444.1	7.27146	+	dd_Smes_g4_134	654898	656899	7.38403	1	MSTRG.12684	nkx5-3
22168	dd_Smes_g4_14	5938455	5938462	CG34031_MA0444.1	7.27146	+	dd_Smes_g4_14	5937151	5939152	11.4519	1	MSTRG.12684	nkx5-3
22331	dd_Smes_g4_15	2426125	2426132	CG34031_MA0444.1	7.27146	+	dd_Smes_g4_15	2425750	2427806	9.17873	1	MSTRG.12684	nkx5-3
22358	dd_Smes_g4_15	3264382	3264389	CG34031_MA0444.1	7.27146	-	dd_Smes_g4_15	3262758	3265761	8.47344	1	MSTRG.12684	nkx5-3
22442	dd_Smes_g4_15	6115470	6115477	CG34031_MA0444.1	7.27146	-	dd_Smes_g4_15	6115432	6117433	7.80945	1	MSTRG.12684	nkx5-3
22489	dd_Smes_g4_15	7531572	7531579	CG34031_MA0444.1	7.27146	-	dd_Smes_g4_15	7528944	7532541	8.14596	1	MSTRG.12684	nkx5-3
22638	dd_Smes_g4_16	2316858	2316865	CG34031_MA0444.1	7.27146	+	dd_Smes_g4_16	2315065	2317066	8.19899	1	MSTRG.12684	nkx5-3
22671	dd_Smes_g4_16	3954310	3954317	CG34031_MA0444.1	7.27146	+	dd_Smes_g4_16	3952821	3954822	9.09217	1	MSTRG.12684	nkx5-3
22842	dd_Smes_g4_172	823414	823421	CG34031_MA0444.1	7.27146	+	dd_Smes_g4_172	823223	825387	8.60496	1	MSTRG.12684	nkx5-3
22857	dd_Smes_g4_172	887118	887125	CG34031_MA0444.1	7.27146	+	dd_Smes_g4_172	878072	888187	9.44518	1	MSTRG.12684	nkx5-3
23017	dd_Smes_g4_18	4127778	4127785	CG34031_MA0444.1	7.27146	+	dd_Smes_g4_18	4126689	4128690	8.15069	1	MSTRG.12684	nkx5-3
23152	dd_Smes_g4_186	937428	937435	CG34031_MA0444.1	7.27146	+	dd_Smes_g4_186	931928	938875	8.68934	1	MSTRG.12684	nkx5-3
23212	dd_Smes_g4_19	1552130	1552137	CG34031_MA0444.1	7.27146	+	dd_Smes_g4_19	1550218	1554331	7.55754	1	MSTRG.12684	nkx5-3
23352	dd_Smes_g4_2	7557834	7557841	CG34031_MA0444.1	7.27146	-	dd_Smes_g4_2	7556540	7558541	8.04799	1	MSTRG.12684	nkx5-3
23355	dd_Smes_g4_2	8522936	8522943	CG34031_MA0444.1	7.27146	-	dd_Smes_g4_2	8520781	8523966	7.71057	1	MSTRG.12684	nkx5-3
23393	dd_Smes_g4_2	12203405	12203412	CG34031_MA0444.1	7.27146	+	dd_Smes_g4_2	12202518	12204519	7.71994	1	MSTRG.12684	nkx5-3
23475	dd_Smes_g4_20	4323713	4323720	CG34031_MA0444.1	7.27146	+	dd_Smes_g4_20	4323295	4325547	7.74672	1	MSTRG.12684	nkx5-3
23484	dd_Smes_g4_20	6633882	6633889	CG34031_MA0444.1	7.27146	-	dd_Smes_g4_20	6629278	6635123	8.14102	1	MSTRG.12684	nkx5-3
23528	dd_Smes_g4_201	229322	229329	CG34031_MA0444.1	7.27146	+	dd_Smes_g4_201	228930	230931	7.47031	1	MSTRG.12684	nkx5-3
23543	dd_Smes_g4_202	134251	134258	CG34031_MA0444.1	7.27146	-	dd_Smes_g4_202	133209	135815	7.43563	1	MSTRG.12684	nkx5-3
23557	dd_Smes_g4_204	723243	723250	CG34031_MA0444.1	7.27146	-	dd_Smes_g4_204	722097	724098	8.93571	1	MSTRG.12684	nkx5-3
23708	dd_Smes_g4_22	2593869	2593876	CG34031_MA0444.1	7.27146	+	dd_Smes_g4_22	2593139	2595140	8.11847	1	MSTRG.12684	nkx5-3
23835	dd_Smes_g4_232	416289	416296	CG34031_MA0444.1	7.27146	+	dd_Smes_g4_232	414171	416521	7.55107	1	MSTRG.12684	nkx5-3
23838	dd_Smes_g4_232	420433	420440	CG34031_MA0444.1	7.27146	-	dd_Smes_g4_232	419474	421475	8.66579	1	MSTRG.12684	nkx5-3
23886	dd_Smes_g4_24	2133430	2133437	CG34031_MA0444.1	7.27146	-	dd_Smes_g4_24	2132331	2134332	7.43319	1	MSTRG.12684	nkx5-3
23936	dd_Smes_g4_25	248058	248065	CG34031_MA0444.1	7.27146	+	dd_Smes_g4_25	246711	248712	7.705	1	MSTRG.12684	nkx5-3
24211	dd_Smes_g4_298	95494	95501	CG34031_MA0444.1	7.27146	-	dd_Smes_g4_298	94854	96855	10.6206	1	MSTRG.12684	nkx5-3
24212	dd_Smes_g4_298	95509	95516	CG34031_MA0444.1	7.27146	-	dd_Smes_g4_298	94854	96855	10.6206	1	MSTRG.12684	nkx5-3
24214	dd_Smes_g4_3	25485	25492	CG34031_MA0444.1	7.27146	-	dd_Smes_g4_3	24655	26656	13.6829	1	MSTRG.12684	nkx5-3
24215	dd_Smes_g4_3	25766	25773	CG34031_MA0444.1	7.27146	-	dd_Smes_g4_3	24655	26656	20.8869	1	MSTRG.12684	nkx5-3
24216	dd_Smes_g4_3	26255	26262	CG34031_MA0444.1	7.27146	+	dd_Smes_g4_3	24655	26656	8.84699	1	MSTRG.12684	nkx5-3
24392	dd_Smes_g4_31	4349446	4349453	CG34031_MA0444.1	7.27146	-	dd_Smes_g4_31	4348690	4350796	8.00748	1	MSTRG.12684	nkx5-3
24495	dd_Smes_g4_35	1546399	1546406	CG34031_MA0444.1	7.27146	-	dd_Smes_g4_35	1545201	1547202	8.60892	1	MSTRG.12684	nkx5-3
24540	dd_Smes_g4_36	3563747	3563754	CG34031_MA0444.1	7.27146	+	dd_Smes_g4_36	3561870	3564328	8.92984	1	MSTRG.12684	nkx5-3
24555	dd_Smes_g4_37	586860	586867	CG34031_MA0444.1	7.27146	+	dd_Smes_g4_37	585958	587959	7.53634	1	MSTRG.12684	nkx5-3
24596	dd_Smes_g4_37	2759397	2759404	CG34031_MA0444.1	7.27146	+	dd_Smes_g4_37	2759340	2763011	7.76979	1	MSTRG.12684	nkx5-3
24656	dd_Smes_g4_38	4513353	4513360	CG34031_MA0444.1	7.27146	-	dd_Smes_g4_38	4512448	4515216	8.25296	1	MSTRG.12684	nkx5-3
24850	dd_Smes_g4_41	782054	782061	CG34031_MA0444.1	7.27146	+	dd_Smes_g4_41	781939	783940	7.40836	1	MSTRG.12684	nkx5-3
24904	dd_Smes_g4_428	28962	28969	CG34031_MA0444.1	7.27146	+	dd_Smes_g4_428	27933	29934	50.1703	1	MSTRG.12684	nkx5-3
24913	dd_Smes_g4_43	2387006	2387013	CG34031_MA0444.1	7.27146	+	dd_Smes_g4_43	2385602	2388740	8.39148	1	MSTRG.12684	nkx5-3
24942	dd_Smes_g4_44	1484525	1484532	CG34031_MA0444.1	7.27146	-	dd_Smes_g4_44	1483679	1485680	14.0457	1	MSTRG.12684	nkx5-3
25091	dd_Smes_g4_5	9186715	9186722	CG34031_MA0444.1	7.27146	+	dd_Smes_g4_5	9184801	9189613	7.60095	1	MSTRG.12684	nkx5-3
25115	dd_Smes_g4_50	642461	642468	CG34031_MA0444.1	7.27146	+	dd_Smes_g4_50	641648	643649	15.9526	1	MSTRG.12684	nkx5-3
25175	dd_Smes_g4_51	1160285	1160292	CG34031_MA0444.1	7.27146	+	dd_Smes_g4_51	1158779	1160780	7.64582	1	MSTRG.12684	nkx5-3
25322	dd_Smes_g4_55	1588308	1588315	CG34031_MA0444.1	7.27146	-	dd_Smes_g4_55	1587912	1589913	8.28233	1	MSTRG.12684	nkx5-3
25368	dd_Smes_g4_57	1759585	1759592	CG34031_MA0444.1	7.27146	+	dd_Smes_g4_57	1759172	1761173	9.76287	1	MSTRG.12684	nkx5-3
25374	dd_Smes_g4_57	1973513	1973520	CG34031_MA0444.1	7.27146	+	dd_Smes_g4_57	1972296	1974297	8.26429	1	MSTRG.12684	nkx5-3
25384	dd_Smes_g4_57	2950092	2950099	CG34031_MA0444.1	7.27146	+	dd_Smes_g4_57	2948820	2950821	7.93052	1	MSTRG.12684	nkx5-3
25517	dd_Smes_g4_60	3248994	3249001	CG34031_MA0444.1	7.27146	-	dd_Smes_g4_60	3247858	3251533	8.65641	1	MSTRG.12684	nkx5-3
25550	dd_Smes_g4_62	752579	752586	CG34031_MA0444.1	7.27146	-	dd_Smes_g4_62	750824	757294	8.22403	1	MSTRG.12684	nkx5-3
25588	dd_Smes_g4_64	1818253	1818260	CG34031_MA0444.1	7.27146	-	dd_Smes_g4_64	1815869	1820034	8.41071	1	MSTRG.12684	nkx5-3
25735	dd_Smes_g4_69	694325	694332	CG34031_MA0444.1	7.27146	-	dd_Smes_g4_69	693513	696337	8.16055	1	MSTRG.12684	nkx5-3
25795	dd_Smes_g4_70	2318718	2318725	CG34031_MA0444.1	7.27146	+	dd_Smes_g4_70	2318038	2320365	7.3916	1	MSTRG.12684	nkx5-3
25852	dd_Smes_g4_73	896206	896213	CG34031_MA0444.1	7.27146	+	dd_Smes_g4_73	893613	896270	8.11683	1	MSTRG.12684	nkx5-3
25853	dd_Smes_g4_73	896229	896236	CG34031_MA0444.1	7.27146	-	dd_Smes_g4_73	893613	896270	7.55955	1	MSTRG.12684	nkx5-3
25915	dd_Smes_g4_76	2507540	2507547	CG34031_MA0444.1	7.27146	+	dd_Smes_g4_76	2506529	2509173	7.55795	1	MSTRG.12684	nkx5-3
25918	dd_Smes_g4_76	2519197	2519204	CG34031_MA0444.1	7.27146	-	dd_Smes_g4_76	2518637	2521940	10.0582	1	MSTRG.12684	nkx5-3
25945	dd_Smes_g4_77	2918516	2918523	CG34031_MA0444.1	7.27146	+	dd_Smes_g4_77	2917351	2920445	9.47022	1	MSTRG.12684	nkx5-3
25946	dd_Smes_g4_77	2928390	2928397	CG34031_MA0444.1	7.27146	-	dd_Smes_g4_77	2927233	2929234	7.44563	1	MSTRG.12684	nkx5-3
26064	dd_Smes_g4_81	2593568	2593575	CG34031_MA0444.1	7.27146	-	dd_Smes_g4_81	2593387	2595427	11.8015	1	MSTRG.12684	nkx5-3
26065	dd_Smes_g4_81	2593776	2593783	CG34031_MA0444.1	7.27146	+	dd_Smes_g4_81	2593387	2595427	10.2499	1	MSTRG.12684	nkx5-3
26126	dd_Smes_g4_85	481019	481026	CG34031_MA0444.1	7.27146	+	dd_Smes_g4_85	479944	481945	7.52919	1	MSTRG.12684	nkx5-3
26360	dd_Smes_g4_93	499299	499306	CG34031_MA0444.1	7.27146	-	dd_Smes_g4_93	499177	501879	12.4114	1	MSTRG.12684	nkx5-3
26361	dd_Smes_g4_93	499774	499781	CG34031_MA0444.1	7.27146	+	dd_Smes_g4_93	499177	501879	8.89835	1	MSTRG.12684	nkx5-3
26398	dd_Smes_g4_94	2270790	2270797	CG34031_MA0444.1	7.27146	+	dd_Smes_g4_94	2268785	2271144	9.91283	1	MSTRG.12684	nkx5-3
26461	dd_Smes_g4_97	1390745	1390752	CG34031_MA0444.1	7.27146	-	dd_Smes_g4_97	1389285	1391286	8.7967	1	MSTRG.12684	nkx5-3
26488	dd_Smes_g4_99	1249469	1249476	CG34031_MA0444.1	7.27146	-	dd_Smes_g4_99	1248962	1250963	7.5137	1	MSTRG.12684	nkx5-3
26489	dd_Smes_g4_99	1249542	1249549	CG34031_MA0444.1	7.27146	-	dd_Smes_g4_99	1248962	1250963	8.81107	1	MSTRG.12684	nkx5-3
26494	dd_Smes_g4_1	863404	863418	CREB3L1_MA0839.1	5.09637	+	dd_Smes_g4_1	862317	864318	9.12482	1	MSTRG.19544	creb3l-1
26515	dd_Smes_g4_1	5109546	5109560	CREB3L1_MA0839.1	5.05422	-	dd_Smes_g4_1	5109337	5111338	8.75516	1	MSTRG.19544	creb3l-1
26528	dd_Smes_g4_1	8172248	8172262	CREB3L1_MA0839.1	6.82947	-	dd_Smes_g4_1	8170328	8172970	7.57389	1	MSTRG.19544	creb3l-1
26536	dd_Smes_g4_1	10346570	10346584	CREB3L1_MA0839.1	9.18094	-	dd_Smes_g4_1	10345531	10347532	7.86275	1	MSTRG.19544	creb3l-1
26539	dd_Smes_g4_1	11642464	11642478	CREB3L1_MA0839.1	6.77922	-	dd_Smes_g4_1	11641940	11643941	7.64163	1	MSTRG.19544	creb3l-1
26541	dd_Smes_g4_1	12160095	12160109	CREB3L1_MA0839.1	4.83772	+	dd_Smes_g4_1	12158759	12160907	8.63075	1	MSTRG.19544	creb3l-1
26548	dd_Smes_g4_1	13784419	13784433	CREB3L1_MA0839.1	6.39539	+	dd_Smes_g4_1	13782845	13784846	8.5821	1	MSTRG.19544	creb3l-1
26561	dd_Smes_g4_1	15735524	15735538	CREB3L1_MA0839.1	4.85599	+	dd_Smes_g4_1	15734614	15736615	8.87783	1	MSTRG.19544	creb3l-1
26601	dd_Smes_g4_100	778020	778034	CREB3L1_MA0839.1	5.6396	+	dd_Smes_g4_100	776999	779000	9.99793	1	MSTRG.19544	creb3l-1
26604	dd_Smes_g4_101	461496	461510	CREB3L1_MA0839.1	5.232	-	dd_Smes_g4_101	460467	462468	7.4132	1	MSTRG.19544	creb3l-1
26613	dd_Smes_g4_103	400370	400384	CREB3L1_MA0839.1	7.37676	-	dd_Smes_g4_103	399399	401400	8.68739	1	MSTRG.19544	creb3l-1
26624	dd_Smes_g4_106	331572	331586	CREB3L1_MA0839.1	12.8579	+	dd_Smes_g4_106	329774	331775	10.1953	1	MSTRG.19544	creb3l-1
26633	dd_Smes_g4_106	2229670	2229684	CREB3L1_MA0839.1	4.93814	+	dd_Smes_g4_106	2228853	2230854	7.40122	1	MSTRG.19544	creb3l-1
26635	dd_Smes_g4_106	2233805	2233819	CREB3L1_MA0839.1	5.95335	-	dd_Smes_g4_106	2232158	2234159	7.5921	1	MSTRG.19544	creb3l-1
26646	dd_Smes_g4_108	1330470	1330484	CREB3L1_MA0839.1	4.90465	-	dd_Smes_g4_108	1328618	1330619	7.58293	1	MSTRG.19544	creb3l-1
26657	dd_Smes_g4_109	2110366	2110380	CREB3L1_MA0839.1	4.97315	-	dd_Smes_g4_109	2109339	2111340	8.50055	1	MSTRG.19544	creb3l-1
26686	dd_Smes_g4_111	210023	210037	CREB3L1_MA0839.1	7.89674	-	dd_Smes_g4_111	208242	211063	7.43388	1	MSTRG.19544	creb3l-1
26693	dd_Smes_g4_112	936131	936145	CREB3L1_MA0839.1	5.75497	+	dd_Smes_g4_112	935661	938503	9.96311	1	MSTRG.19544	creb3l-1
26707	dd_Smes_g4_114	1577348	1577362	CREB3L1_MA0839.1	4.45209	-	dd_Smes_g4_114	1575839	1577840	7.7193	1	MSTRG.19544	creb3l-1
26724	dd_Smes_g4_117	998992	999006	CREB3L1_MA0839.1	9.27385	-	dd_Smes_g4_117	998359	1000489	7.70916	1	MSTRG.19544	creb3l-1
26733	dd_Smes_g4_117	1383616	1383630	CREB3L1_MA0839.1	8.73107	+	dd_Smes_g4_117	1379948	1384071	7.37196	1	MSTRG.19544	creb3l-1
26735	dd_Smes_g4_117	1494875	1494889	CREB3L1_MA0839.1	4.76788	-	dd_Smes_g4_117	1493759	1495760	8.84117	1	MSTRG.19544	creb3l-1
26768	dd_Smes_g4_12	8178471	8178485	CREB3L1_MA0839.1	6.16213	-	dd_Smes_g4_12	8177820	8179821	8.0518	1	MSTRG.19544	creb3l-1
26769	dd_Smes_g4_12	8178706	8178720	CREB3L1_MA0839.1	5.8316	+	dd_Smes_g4_12	8177820	8179821	9.09869	1	MSTRG.19544	creb3l-1
26782	dd_Smes_g4_125	1047312	1047326	CREB3L1_MA0839.1	7.48563	-	dd_Smes_g4_125	1046158	1050405	9.47797	1	MSTRG.19544	creb3l-1
26783	dd_Smes_g4_125	1047416	1047430	CREB3L1_MA0839.1	4.97559	-	dd_Smes_g4_125	1046158	1050405	11.5353	1	MSTRG.19544	creb3l-1
26784	dd_Smes_g4_125	1047917	1047931	CREB3L1_MA0839.1	5.18966	+	dd_Smes_g4_125	1046158	1050405	11.12	1	MSTRG.19544	creb3l-1
26790	dd_Smes_g4_125	1066954	1066968	CREB3L1_MA0839.1	5.27758	-	dd_Smes_g4_125	1065957	1069998	9.14775	1	MSTRG.19544	creb3l-1
26796	dd_Smes_g4_127	1868286	1868300	CREB3L1_MA0839.1	5.68051	-	dd_Smes_g4_127	1867600	1869601	8.24564	1	MSTRG.19544	creb3l-1
26801	dd_Smes_g4_128	1408520	1408534	CREB3L1_MA0839.1	7.3691	-	dd_Smes_g4_128	1406634	1411272	13.1254	1	MSTRG.19544	creb3l-1
26815	dd_Smes_g4_129	928203	928217	CREB3L1_MA0839.1	6.00608	+	dd_Smes_g4_129	927533	929534	7.8956	1	MSTRG.19544	creb3l-1
26828	dd_Smes_g4_13	5193429	5193443	CREB3L1_MA0839.1	8.46853	+	dd_Smes_g4_13	5192196	5194197	7.85158	1	MSTRG.19544	creb3l-1
26840	dd_Smes_g4_13	6212336	6212350	CREB3L1_MA0839.1	5.25942	-	dd_Smes_g4_13	6211334	6213335	7.39674	1	MSTRG.19544	creb3l-1
26853	dd_Smes_g4_13	7394009	7394023	CREB3L1_MA0839.1	7.11789	-	dd_Smes_g4_13	7392259	7394775	7.39574	1	MSTRG.19544	creb3l-1
26869	dd_Smes_g4_131	724581	724595	CREB3L1_MA0839.1	4.79694	-	dd_Smes_g4_131	719448	725309	8.86243	1	MSTRG.19544	creb3l-1
26886	dd_Smes_g4_131	1686509	1686523	CREB3L1_MA0839.1	4.88451	-	dd_Smes_g4_131	1684914	1687289	11.53	1	MSTRG.19544	creb3l-1
26926	dd_Smes_g4_134	953831	953845	CREB3L1_MA0839.1	5.49662	+	dd_Smes_g4_134	952846	954847	7.62654	1	MSTRG.19544	creb3l-1
26927	dd_Smes_g4_134	953877	953891	CREB3L1_MA0839.1	6.13178	+	dd_Smes_g4_134	952846	954847	7.75771	1	MSTRG.19544	creb3l-1
26928	dd_Smes_g4_134	1056135	1056149	CREB3L1_MA0839.1	6.2373	-	dd_Smes_g4_134	1055204	1057665	9.4717	1	MSTRG.19544	creb3l-1
26936	dd_Smes_g4_134	1416723	1416737	CREB3L1_MA0839.1	5.77577	-	dd_Smes_g4_134	1415842	1418595	8.20425	1	MSTRG.19544	creb3l-1
26941	dd_Smes_g4_134	1642978	1642992	CREB3L1_MA0839.1	9.73115	-	dd_Smes_g4_134	1641685	1643747	7.8867	1	MSTRG.19544	creb3l-1
26955	dd_Smes_g4_138	1327003	1327017	CREB3L1_MA0839.1	7.36189	-	dd_Smes_g4_138	1325790	1327791	8.14395	1	MSTRG.19544	creb3l-1
26978	dd_Smes_g4_14	4475896	4475910	CREB3L1_MA0839.1	7.93621	+	dd_Smes_g4_14	4474597	4476598	7.54558	1	MSTRG.19544	creb3l-1
26991	dd_Smes_g4_14	5938984	5938998	CREB3L1_MA0839.1	4.76054	-	dd_Smes_g4_14	5937151	5939152	7.4398	1	MSTRG.19544	creb3l-1
27047	dd_Smes_g4_15	3900104	3900118	CREB3L1_MA0839.1	5.29387	-	dd_Smes_g4_15	3898291	3900292	7.58428	1	MSTRG.19544	creb3l-1
27061	dd_Smes_g4_15	5347096	5347110	CREB3L1_MA0839.1	7.62604	-	dd_Smes_g4_15	5345975	5349549	9.28197	1	MSTRG.19544	creb3l-1
27063	dd_Smes_g4_15	5348463	5348477	CREB3L1_MA0839.1	4.4895	+	dd_Smes_g4_15	5345975	5349549	7.66665	1	MSTRG.19544	creb3l-1
27118	dd_Smes_g4_15	7826868	7826882	CREB3L1_MA0839.1	4.4793	-	dd_Smes_g4_15	7826618	7828669	12.4911	1	MSTRG.19544	creb3l-1
27130	dd_Smes_g4_155	292653	292667	CREB3L1_MA0839.1	8.64787	+	dd_Smes_g4_155	292592	294593	7.50069	1	MSTRG.19544	creb3l-1
27138	dd_Smes_g4_156	1183915	1183929	CREB3L1_MA0839.1	5.02297	-	dd_Smes_g4_156	1182668	1184669	7.823	1	MSTRG.19544	creb3l-1
27139	dd_Smes_g4_157	247582	247596	CREB3L1_MA0839.1	5.99096	-	dd_Smes_g4_157	246758	248759	8.33447	1	MSTRG.19544	creb3l-1
27141	dd_Smes_g4_157	465326	465340	CREB3L1_MA0839.1	6.72111	-	dd_Smes_g4_157	465024	467128	8.04533	1	MSTRG.19544	creb3l-1
27145	dd_Smes_g4_157	490578	490592	CREB3L1_MA0839.1	4.77122	+	dd_Smes_g4_157	488604	490908	7.47507	1	MSTRG.19544	creb3l-1
27146	dd_Smes_g4_157	495795	495809	CREB3L1_MA0839.1	6.50671	+	dd_Smes_g4_157	493965	495966	7.74592	1	MSTRG.19544	creb3l-1
27167	dd_Smes_g4_157	892540	892554	CREB3L1_MA0839.1	6.35302	-	dd_Smes_g4_157	890517	893056	9.75788	1	MSTRG.19544	creb3l-1
27191	dd_Smes_g4_16	2317006	2317020	CREB3L1_MA0839.1	5.04614	+	dd_Smes_g4_16	2315065	2317066	8.18596	1	MSTRG.19544	creb3l-1
27217	dd_Smes_g4_162	1133854	1133868	CREB3L1_MA0839.1	5.06061	-	dd_Smes_g4_162	1132812	1134813	7.43272	1	MSTRG.19544	creb3l-1
27260	dd_Smes_g4_172	209929	209943	CREB3L1_MA0839.1	5.79579	+	dd_Smes_g4_172	208289	210290	7.8333	1	MSTRG.19544	creb3l-1
27262	dd_Smes_g4_172	268519	268533	CREB3L1_MA0839.1	5.35756	-	dd_Smes_g4_172	267287	270094	8.21027	1	MSTRG.19544	creb3l-1
27267	dd_Smes_g4_172	632265	632279	CREB3L1_MA0839.1	4.72917	+	dd_Smes_g4_172	630825	634126	9.71595	1	MSTRG.19544	creb3l-1
27269	dd_Smes_g4_172	705243	705257	CREB3L1_MA0839.1	4.62258	+	dd_Smes_g4_172	703375	705376	7.53599	1	MSTRG.19544	creb3l-1
27294	dd_Smes_g4_172	974939	974953	CREB3L1_MA0839.1	4.86033	+	dd_Smes_g4_172	972613	976453	8.0482	1	MSTRG.19544	creb3l-1
27383	dd_Smes_g4_18	6634542	6634556	CREB3L1_MA0839.1	5.16897	+	dd_Smes_g4_18	6633489	6635490	8.47838	1	MSTRG.19544	creb3l-1
27387	dd_Smes_g4_18	7213262	7213276	CREB3L1_MA0839.1	4.75435	-	dd_Smes_g4_18	7211532	7215371	9.33718	1	MSTRG.19544	creb3l-1
27388	dd_Smes_g4_18	7214200	7214214	CREB3L1_MA0839.1	7.00364	-	dd_Smes_g4_18	7211532	7215371	8.13407	1	MSTRG.19544	creb3l-1
27389	dd_Smes_g4_18	7448011	7448025	CREB3L1_MA0839.1	4.49423	+	dd_Smes_g4_18	7446761	7449474	7.67369	1	MSTRG.19544	creb3l-1
27443	dd_Smes_g4_19	1406078	1406092	CREB3L1_MA0839.1	5.69371	+	dd_Smes_g4_19	1404876	1406877	7.93963	1	MSTRG.19544	creb3l-1
27464	dd_Smes_g4_190	613056	613070	CREB3L1_MA0839.1	4.55273	+	dd_Smes_g4_190	611341	613342	7.85719	1	MSTRG.19544	creb3l-1
27476	dd_Smes_g4_196	154259	154273	CREB3L1_MA0839.1	8.78327	+	dd_Smes_g4_196	150950	155352	7.44194	1	MSTRG.19544	creb3l-1
27505	dd_Smes_g4_2	7557758	7557772	CREB3L1_MA0839.1	4.51265	+	dd_Smes_g4_2	7556540	7558541	7.43719	1	MSTRG.19544	creb3l-1
27508	dd_Smes_g4_2	7810764	7810778	CREB3L1_MA0839.1	4.77865	+	dd_Smes_g4_2	7809435	7811507	8.79407	1	MSTRG.19544	creb3l-1
27518	dd_Smes_g4_2	12015422	12015436	CREB3L1_MA0839.1	6.14105	-	dd_Smes_g4_2	12014876	12016877	7.47071	1	MSTRG.19544	creb3l-1
27563	dd_Smes_g4_202	269594	269608	CREB3L1_MA0839.1	8.49353	-	dd_Smes_g4_202	269059	271060	7.72074	1	MSTRG.19544	creb3l-1
27566	dd_Smes_g4_202	535712	535726	CREB3L1_MA0839.1	4.80297	-	dd_Smes_g4_202	533688	535755	7.64477	1	MSTRG.19544	creb3l-1
27567	dd_Smes_g4_202	702507	702521	CREB3L1_MA0839.1	4.70935	+	dd_Smes_g4_202	701647	703648	7.73788	1	MSTRG.19544	creb3l-1
27594	dd_Smes_g4_21	4604909	4604923	CREB3L1_MA0839.1	6.77296	-	dd_Smes_g4_21	4603645	4605646	7.67882	1	MSTRG.19544	creb3l-1
27630	dd_Smes_g4_219	222177	222191	CREB3L1_MA0839.1	5.17182	-	dd_Smes_g4_219	220406	222407	10.8654	1	MSTRG.19544	creb3l-1
27700	dd_Smes_g4_231	116922	116936	CREB3L1_MA0839.1	5.30029	+	dd_Smes_g4_231	115917	118604	7.67007	1	MSTRG.19544	creb3l-1
27701	dd_Smes_g4_231	402895	402909	CREB3L1_MA0839.1	6.04724	-	dd_Smes_g4_231	401888	403889	7.80238	1	MSTRG.19544	creb3l-1
27702	dd_Smes_g4_231	407942	407956	CREB3L1_MA0839.1	4.93353	+	dd_Smes_g4_231	406859	411405	7.80509	1	MSTRG.19544	creb3l-1
27714	dd_Smes_g4_232	58939	58953	CREB3L1_MA0839.1	6.11177	+	dd_Smes_g4_232	57443	59918	9.44586	1	MSTRG.19544	creb3l-1
27715	dd_Smes_g4_232	59022	59036	CREB3L1_MA0839.1	6.06277	+	dd_Smes_g4_232	57443	59918	9.99895	1	MSTRG.19544	creb3l-1
27720	dd_Smes_g4_232	80715	80729	CREB3L1_MA0839.1	8.72497	+	dd_Smes_g4_232	79545	81851	8.16542	1	MSTRG.19544	creb3l-1
27723	dd_Smes_g4_232	350799	350813	CREB3L1_MA0839.1	7.64946	+	dd_Smes_g4_232	348897	352802	8.0005	1	MSTRG.19544	creb3l-1
27724	dd_Smes_g4_232	350895	350909	CREB3L1_MA0839.1	5.37036	-	dd_Smes_g4_232	348897	352802	7.56028	1	MSTRG.19544	creb3l-1
27726	dd_Smes_g4_232	354704	354718	CREB3L1_MA0839.1	8.34496	-	dd_Smes_g4_232	354125	356126	14.4755	1	MSTRG.19544	creb3l-1
27730	dd_Smes_g4_232	410466	410480	CREB3L1_MA0839.1	5.51806	-	dd_Smes_g4_232	408917	411088	7.96642	1	MSTRG.19544	creb3l-1
27735	dd_Smes_g4_232	417663	417677	CREB3L1_MA0839.1	6.55705	+	dd_Smes_g4_232	417051	419052	9.89699	1	MSTRG.19544	creb3l-1
27737	dd_Smes_g4_232	497954	497968	CREB3L1_MA0839.1	6.06681	-	dd_Smes_g4_232	495426	499108	10.9758	1	MSTRG.19544	creb3l-1
27742	dd_Smes_g4_232	526531	526545	CREB3L1_MA0839.1	9.2874	+	dd_Smes_g4_232	525341	527342	8.52087	1	MSTRG.19544	creb3l-1
27743	dd_Smes_g4_232	594944	594958	CREB3L1_MA0839.1	4.56262	+	dd_Smes_g4_232	594545	596546	10.038	1	MSTRG.19544	creb3l-1
27744	dd_Smes_g4_232	595619	595633	CREB3L1_MA0839.1	7.94981	-	dd_Smes_g4_232	594545	596546	8.78471	1	MSTRG.19544	creb3l-1
27771	dd_Smes_g4_245	150246	150260	CREB3L1_MA0839.1	8.36172	+	dd_Smes_g4_245	148380	151898	9.44267	1	MSTRG.19544	creb3l-1
27813	dd_Smes_g4_265	36901	36915	CREB3L1_MA0839.1	4.61783	-	dd_Smes_g4_265	36093	43765	8.40635	1	MSTRG.19544	creb3l-1
27815	dd_Smes_g4_265	38219	38233	CREB3L1_MA0839.1	4.52624	-	dd_Smes_g4_265	36093	43765	12.1244	1	MSTRG.19544	creb3l-1
27816	dd_Smes_g4_265	38980	38994	CREB3L1_MA0839.1	5.29438	+	dd_Smes_g4_265	36093	43765	8.18861	1	MSTRG.19544	creb3l-1
27817	dd_Smes_g4_265	52888	52902	CREB3L1_MA0839.1	4.83628	-	dd_Smes_g4_265	49999	53312	7.61376	1	MSTRG.19544	creb3l-1
27819	dd_Smes_g4_265	58086	58100	CREB3L1_MA0839.1	4.4485	-	dd_Smes_g4_265	57533	59534	7.8605	1	MSTRG.19544	creb3l-1
27828	dd_Smes_g4_265	238563	238577	CREB3L1_MA0839.1	10.1876	-	dd_Smes_g4_265	238492	240493	10.4035	1	MSTRG.19544	creb3l-1
27829	dd_Smes_g4_265	238577	238591	CREB3L1_MA0839.1	5.86265	+	dd_Smes_g4_265	238492	240493	9.01474	1	MSTRG.19544	creb3l-1
27832	dd_Smes_g4_265	282550	282564	CREB3L1_MA0839.1	6.03373	+	dd_Smes_g4_265	282457	285094	9.4284	1	MSTRG.19544	creb3l-1
27833	dd_Smes_g4_265	283215	283229	CREB3L1_MA0839.1	4.44155	+	dd_Smes_g4_265	282457	285094	7.71243	1	MSTRG.19544	creb3l-1
27842	dd_Smes_g4_265	351974	351988	CREB3L1_MA0839.1	7.17487	-	dd_Smes_g4_265	349928	351999	8.65275	1	MSTRG.19544	creb3l-1
27843	dd_Smes_g4_265	421104	421118	CREB3L1_MA0839.1	5.38303	-	dd_Smes_g4_265	417866	422224	8.51663	1	MSTRG.19544	creb3l-1
27847	dd_Smes_g4_265	528754	528768	CREB3L1_MA0839.1	9.01643	+	dd_Smes_g4_265	527663	529704	8.08978	1	MSTRG.19544	creb3l-1
27875	dd_Smes_g4_27	5810674	5810688	CREB3L1_MA0839.1	8.0589	-	dd_Smes_g4_27	5808859	5810860	8.56295	1	MSTRG.19544	creb3l-1
27897	dd_Smes_g4_29	1147872	1147886	CREB3L1_MA0839.1	5.66778	+	dd_Smes_g4_29	1147773	1149774	10.7816	1	MSTRG.19544	creb3l-1
27922	dd_Smes_g4_290	305393	305407	CREB3L1_MA0839.1	10.4045	+	dd_Smes_g4_290	303900	305901	7.52056	1	MSTRG.19544	creb3l-1
27925	dd_Smes_g4_297	109860	109874	CREB3L1_MA0839.1	9.52166	+	dd_Smes_g4_297	108282	110401	8.51932	1	MSTRG.19544	creb3l-1
27970	dd_Smes_g4_297	327114	327128	CREB3L1_MA0839.1	5.75672	+	dd_Smes_g4_297	326940	328941	9.14415	1	MSTRG.19544	creb3l-1
27971	dd_Smes_g4_297	327532	327546	CREB3L1_MA0839.1	7.42049	-	dd_Smes_g4_297	326940	328941	13.4836	1	MSTRG.19544	creb3l-1
27972	dd_Smes_g4_297	327665	327679	CREB3L1_MA0839.1	7.42049	-	dd_Smes_g4_297	326940	328941	10.9816	1	MSTRG.19544	creb3l-1
27974	dd_Smes_g4_298	105398	105412	CREB3L1_MA0839.1	5.66319	-	dd_Smes_g4_298	105076	108302	7.75577	1	MSTRG.19544	creb3l-1
27990	dd_Smes_g4_3	1719213	1719227	CREB3L1_MA0839.1	6.22301	+	dd_Smes_g4_3	1717442	1719443	8.37222	1	MSTRG.19544	creb3l-1
28003	dd_Smes_g4_3	6286507	6286521	CREB3L1_MA0839.1	4.71428	-	dd_Smes_g4_3	6285402	6287403	7.78276	1	MSTRG.19544	creb3l-1
28023	dd_Smes_g4_30	1669877	1669891	CREB3L1_MA0839.1	10.0216	+	dd_Smes_g4_30	1669480	1671481	9.6176	1	MSTRG.19544	creb3l-1
28052	dd_Smes_g4_31	3257268	3257282	CREB3L1_MA0839.1	5.46641	-	dd_Smes_g4_31	3255171	3258843	7.6706	1	MSTRG.19544	creb3l-1
28085	dd_Smes_g4_33	2930333	2930347	CREB3L1_MA0839.1	4.97702	+	dd_Smes_g4_33	2929283	2931284	7.44285	1	MSTRG.19544	creb3l-1
28117	dd_Smes_g4_354	9156	9170	CREB3L1_MA0839.1	8.32472	-	dd_Smes_g4_354	8039	10040	22.0391	1	MSTRG.19544	creb3l-1
28135	dd_Smes_g4_37	587628	587642	CREB3L1_MA0839.1	4.90609	-	dd_Smes_g4_37	585958	587959	7.97393	1	MSTRG.19544	creb3l-1
28148	dd_Smes_g4_37	2762077	2762091	CREB3L1_MA0839.1	5.14706	-	dd_Smes_g4_37	2759340	2763011	7.50942	1	MSTRG.19544	creb3l-1
28149	dd_Smes_g4_37	2764618	2764632	CREB3L1_MA0839.1	6.37876	-	dd_Smes_g4_37	2763925	2765926	9.66979	1	MSTRG.19544	creb3l-1
28160	dd_Smes_g4_37	3603048	3603062	CREB3L1_MA0839.1	5.76686	-	dd_Smes_g4_37	3602214	3604481	9.52692	1	MSTRG.19544	creb3l-1
28165	dd_Smes_g4_37	4342959	4342973	CREB3L1_MA0839.1	4.65336	+	dd_Smes_g4_37	4341579	4343580	8.10348	1	MSTRG.19544	creb3l-1
28169	dd_Smes_g4_37	4667734	4667748	CREB3L1_MA0839.1	7.33581	-	dd_Smes_g4_37	4666271	4668272	7.68922	1	MSTRG.19544	creb3l-1
28184	dd_Smes_g4_38	4513747	4513761	CREB3L1_MA0839.1	5.40033	+	dd_Smes_g4_38	4512448	4515216	7.78043	1	MSTRG.19544	creb3l-1
28251	dd_Smes_g4_4	13892511	13892525	CREB3L1_MA0839.1	6.97393	-	dd_Smes_g4_4	13891459	13893460	7.71281	1	MSTRG.19544	creb3l-1
28266	dd_Smes_g4_40	3437135	3437149	CREB3L1_MA0839.1	7.52807	-	dd_Smes_g4_40	3436840	3438841	8.02814	1	MSTRG.19544	creb3l-1
28269	dd_Smes_g4_41	781984	781998	CREB3L1_MA0839.1	7.53194	-	dd_Smes_g4_41	781939	783940	9.604	1	MSTRG.19544	creb3l-1
28293	dd_Smes_g4_428	28761	28775	CREB3L1_MA0839.1	10.0216	-	dd_Smes_g4_428	27933	29934	59.5206	1	MSTRG.19544	creb3l-1
28324	dd_Smes_g4_47	2900113	2900127	CREB3L1_MA0839.1	6.19567	+	dd_Smes_g4_47	2899017	2901018	8.81428	1	MSTRG.19544	creb3l-1
28331	dd_Smes_g4_49	303390	303404	CREB3L1_MA0839.1	7.14273	+	dd_Smes_g4_49	302520	304521	7.70084	1	MSTRG.19544	creb3l-1
28332	dd_Smes_g4_49	303438	303452	CREB3L1_MA0839.1	7.14273	+	dd_Smes_g4_49	302520	304521	7.43036	1	MSTRG.19544	creb3l-1
28340	dd_Smes_g4_49	2983032	2983046	CREB3L1_MA0839.1	5.05976	-	dd_Smes_g4_49	2981723	2983724	10.9858	1	MSTRG.19544	creb3l-1
28342	dd_Smes_g4_49	2993405	2993419	CREB3L1_MA0839.1	5.92267	-	dd_Smes_g4_49	2993331	2995332	8.13436	1	MSTRG.19544	creb3l-1
28373	dd_Smes_g4_50	642885	642899	CREB3L1_MA0839.1	7.3058	-	dd_Smes_g4_50	641648	643649	9.15813	1	MSTRG.19544	creb3l-1
28398	dd_Smes_g4_51	3237854	3237868	CREB3L1_MA0839.1	7.40996	+	dd_Smes_g4_51	3236834	3239556	7.64524	1	MSTRG.19544	creb3l-1
28430	dd_Smes_g4_53	2351056	2351070	CREB3L1_MA0839.1	5.70659	-	dd_Smes_g4_53	2345424	2352507	9.23523	1	MSTRG.19544	creb3l-1
28455	dd_Smes_g4_55	167140	167154	CREB3L1_MA0839.1	4.60504	-	dd_Smes_g4_55	167082	169869	8.01872	1	MSTRG.19544	creb3l-1
28481	dd_Smes_g4_57	1759526	1759540	CREB3L1_MA0839.1	7.56106	-	dd_Smes_g4_57	1759172	1761173	16.1915	1	MSTRG.19544	creb3l-1
28489	dd_Smes_g4_57	2949881	2949895	CREB3L1_MA0839.1	7.08753	-	dd_Smes_g4_57	2948820	2950821	7.42594	1	MSTRG.19544	creb3l-1
28534	dd_Smes_g4_6	7365395	7365409	CREB3L1_MA0839.1	7.91223	-	dd_Smes_g4_6	7365039	7367040	9.40037	1	MSTRG.19544	creb3l-1
28568	dd_Smes_g4_61	1863357	1863371	CREB3L1_MA0839.1	6.94236	+	dd_Smes_g4_61	1862453	1865546	7.44518	1	MSTRG.19544	creb3l-1
28598	dd_Smes_g4_64	1532641	1532655	CREB3L1_MA0839.1	5.42113	-	dd_Smes_g4_64	1531804	1533805	8.01037	1	MSTRG.19544	creb3l-1
28603	dd_Smes_g4_64	1825280	1825294	CREB3L1_MA0839.1	8.38886	+	dd_Smes_g4_64	1824191	1826192	8.41739	1	MSTRG.19544	creb3l-1
28646	dd_Smes_g4_67	2965773	2965787	CREB3L1_MA0839.1	7.19769	-	dd_Smes_g4_67	2963845	2966604	7.84118	1	MSTRG.19544	creb3l-1
28680	dd_Smes_g4_7	2355019	2355033	CREB3L1_MA0839.1	4.95617	-	dd_Smes_g4_7	2354291	2356849	9.39225	1	MSTRG.19544	creb3l-1
28693	dd_Smes_g4_70	553494	553508	CREB3L1_MA0839.1	4.40088	+	dd_Smes_g4_70	552701	554844	7.8305	1	MSTRG.19544	creb3l-1
28741	dd_Smes_g4_74	2316107	2316121	CREB3L1_MA0839.1	4.52079	-	dd_Smes_g4_74	2314738	2318799	7.93207	1	MSTRG.19544	creb3l-1
28758	dd_Smes_g4_76	2503626	2503640	CREB3L1_MA0839.1	6.52248	+	dd_Smes_g4_76	2503447	2506090	7.42598	1	MSTRG.19544	creb3l-1
28759	dd_Smes_g4_76	2504107	2504121	CREB3L1_MA0839.1	8.11815	-	dd_Smes_g4_76	2503447	2506090	8.49837	1	MSTRG.19544	creb3l-1
28761	dd_Smes_g4_76	2514742	2514756	CREB3L1_MA0839.1	4.44227	+	dd_Smes_g4_76	2514194	2518625	7.55132	1	MSTRG.19544	creb3l-1
28762	dd_Smes_g4_76	2514757	2514771	CREB3L1_MA0839.1	5.44827	+	dd_Smes_g4_76	2514194	2518625	7.84319	1	MSTRG.19544	creb3l-1
28767	dd_Smes_g4_76	2521486	2521500	CREB3L1_MA0839.1	9.71277	+	dd_Smes_g4_76	2518637	2521940	9.25106	1	MSTRG.19544	creb3l-1
28774	dd_Smes_g4_76	2849770	2849784	CREB3L1_MA0839.1	4.90834	+	dd_Smes_g4_76	2848657	2850658	8.71374	1	MSTRG.19544	creb3l-1
28781	dd_Smes_g4_77	2515061	2515075	CREB3L1_MA0839.1	8.56179	+	dd_Smes_g4_77	2512984	2516057	10.5415	1	MSTRG.19544	creb3l-1
28782	dd_Smes_g4_77	2927339	2927353	CREB3L1_MA0839.1	6.88232	+	dd_Smes_g4_77	2927233	2929234	8.05956	1	MSTRG.19544	creb3l-1
28797	dd_Smes_g4_78	2901153	2901167	CREB3L1_MA0839.1	4.61574	-	dd_Smes_g4_78	2900350	2903685	7.48862	1	MSTRG.19544	creb3l-1
28823	dd_Smes_g4_8	8653270	8653284	CREB3L1_MA0839.1	7.00299	+	dd_Smes_g4_8	8653169	8655170	10.4823	1	MSTRG.19544	creb3l-1
28829	dd_Smes_g4_80	1880135	1880149	CREB3L1_MA0839.1	5.76852	-	dd_Smes_g4_80	1879337	1881338	9.19309	1	MSTRG.19544	creb3l-1
28841	dd_Smes_g4_82	1547835	1547849	CREB3L1_MA0839.1	4.48419	-	dd_Smes_g4_82	1546192	1548917	9.72098	1	MSTRG.19544	creb3l-1
28858	dd_Smes_g4_83	2403914	2403928	CREB3L1_MA0839.1	5.66037	-	dd_Smes_g4_83	2401732	2407858	7.54517	1	MSTRG.19544	creb3l-1
28863	dd_Smes_g4_84	2142804	2142818	CREB3L1_MA0839.1	5.76828	+	dd_Smes_g4_84	2141691	2144803	7.45044	1	MSTRG.19544	creb3l-1
28883	dd_Smes_g4_86	1431601	1431615	CREB3L1_MA0839.1	5.23206	-	dd_Smes_g4_86	1430880	1432881	8.37245	1	MSTRG.19544	creb3l-1
28887	dd_Smes_g4_86	1883178	1883192	CREB3L1_MA0839.1	10.4485	-	dd_Smes_g4_86	1882409	1884410	7.48254	1	MSTRG.19544	creb3l-1
28888	dd_Smes_g4_86	1883192	1883206	CREB3L1_MA0839.1	4.60841	-	dd_Smes_g4_86	1882409	1884410	7.38941	1	MSTRG.19544	creb3l-1
28894	dd_Smes_g4_86	2340809	2340823	CREB3L1_MA0839.1	4.66742	+	dd_Smes_g4_86	2340789	2342790	8.52964	1	MSTRG.19544	creb3l-1
28908	dd_Smes_g4_87	2683353	2683367	CREB3L1_MA0839.1	6.33827	-	dd_Smes_g4_87	2682936	2684937	7.55331	1	MSTRG.19544	creb3l-1
28918	dd_Smes_g4_89	323200	323214	CREB3L1_MA0839.1	7.62795	-	dd_Smes_g4_89	321722	323928	8.2652	1	MSTRG.19544	creb3l-1
28957	dd_Smes_g4_91	1877590	1877604	CREB3L1_MA0839.1	7.49507	-	dd_Smes_g4_91	1876567	1878730	7.66068	1	MSTRG.19544	creb3l-1
28958	dd_Smes_g4_93	500419	500433	CREB3L1_MA0839.1	4.80411	+	dd_Smes_g4_93	499177	501879	10.0054	1	MSTRG.19544	creb3l-1
28959	dd_Smes_g4_93	501858	501872	CREB3L1_MA0839.1	5.23444	-	dd_Smes_g4_93	499177	501879	7.49846	1	MSTRG.19544	creb3l-1
28964	dd_Smes_g4_94	1957195	1957209	CREB3L1_MA0839.1	4.66258	+	dd_Smes_g4_94	1956166	1958971	30.1776	1	MSTRG.19544	creb3l-1
28974	dd_Smes_g4_94	2270772	2270786	CREB3L1_MA0839.1	8.01391	-	dd_Smes_g4_94	2268785	2271144	9.97043	1	MSTRG.19544	creb3l-1
28975	dd_Smes_g4_94	2317013	2317027	CREB3L1_MA0839.1	5.30988	-	dd_Smes_g4_94	2315153	2317154	8.34706	1	MSTRG.19544	creb3l-1
28994	dd_Smes_g4_97	1054488	1054502	CREB3L1_MA0839.1	5.44448	-	dd_Smes_g4_97	1053840	1059480	8.24475	1	MSTRG.19544	creb3l-1
29006	dd_Smes_g4_99	1249695	1249709	CREB3L1_MA0839.1	10.7158	-	dd_Smes_g4_99	1248962	1250963	10.014	1	MSTRG.19544	creb3l-1
29027	dd_Smes_g4_1	2911801	2911820	CTCF_MA0139.1	5.34936	-	dd_Smes_g4_1	2909301	2914441	9.42233	1	MSTRG.4288:MSTRG.4289:MSTRG.22163:MSTRG.16827:MSTRG.9571:MSTRG.624:MSTRG.11386:MSTRG.22087:MSTRG.10044:MSTRG.5025	hinfp-1:hinfp-2:rest-1:zfp674:znf-1:znf91:znf333-1:znf652:zscan2-2:zscan2-6
29030	dd_Smes_g4_1	2912282	2912301	CTCF_MA0139.1	6.87267	+	dd_Smes_g4_1	2909301	2914441	7.91113	1	MSTRG.4288:MSTRG.4289:MSTRG.22163:MSTRG.16827:MSTRG.9571:MSTRG.624:MSTRG.11386:MSTRG.22087:MSTRG.10044:MSTRG.5025	hinfp-1:hinfp-2:rest-1:zfp674:znf-1:znf91:znf333-1:znf652:zscan2-2:zscan2-6
29052	dd_Smes_g4_1	4703871	4703890	CTCF_MA0139.1	3.94256	-	dd_Smes_g4_1	4703314	4708303	7.49441	1	MSTRG.4288:MSTRG.4289:MSTRG.22163:MSTRG.16827:MSTRG.9571:MSTRG.624:MSTRG.11386:MSTRG.22087:MSTRG.10044:MSTRG.5025	hinfp-1:hinfp-2:rest-1:zfp674:znf-1:znf91:znf333-1:znf652:zscan2-2:zscan2-6
29078	dd_Smes_g4_1	7586928	7586947	CTCF_MA0139.1	3.91795	-	dd_Smes_g4_1	7586024	7588025	8.38803	1	MSTRG.4288:MSTRG.4289:MSTRG.22163:MSTRG.16827:MSTRG.9571:MSTRG.624:MSTRG.11386:MSTRG.22087:MSTRG.10044:MSTRG.5025	hinfp-1:hinfp-2:rest-1:zfp674:znf-1:znf91:znf333-1:znf652:zscan2-2:zscan2-6
29079	dd_Smes_g4_1	7587013	7587032	CTCF_MA0139.1	4.13353	+	dd_Smes_g4_1	7586024	7588025	8.11472	1	MSTRG.4288:MSTRG.4289:MSTRG.22163:MSTRG.16827:MSTRG.9571:MSTRG.624:MSTRG.11386:MSTRG.22087:MSTRG.10044:MSTRG.5025	hinfp-1:hinfp-2:rest-1:zfp674:znf-1:znf91:znf333-1:znf652:zscan2-2:zscan2-6
29092	dd_Smes_g4_1	8172847	8172866	CTCF_MA0139.1	3.9173	-	dd_Smes_g4_1	8170328	8172970	10.6407	1	MSTRG.4288:MSTRG.4289:MSTRG.22163:MSTRG.16827:MSTRG.9571:MSTRG.624:MSTRG.11386:MSTRG.22087:MSTRG.10044:MSTRG.5025	hinfp-1:hinfp-2:rest-1:zfp674:znf-1:znf91:znf333-1:znf652:zscan2-2:zscan2-6
29102	dd_Smes_g4_1	10346574	10346593	CTCF_MA0139.1	3.7232	-	dd_Smes_g4_1	10345531	10347532	7.86275	1	MSTRG.4288:MSTRG.4289:MSTRG.22163:MSTRG.16827:MSTRG.9571:MSTRG.624:MSTRG.11386:MSTRG.22087:MSTRG.10044:MSTRG.5025	hinfp-1:hinfp-2:rest-1:zfp674:znf-1:znf91:znf333-1:znf652:zscan2-2:zscan2-6
29107	dd_Smes_g4_1	10725730	10725749	CTCF_MA0139.1	8.84868	+	dd_Smes_g4_1	10724809	10726810	8.58036	1	MSTRG.4288:MSTRG.4289:MSTRG.22163:MSTRG.16827:MSTRG.9571:MSTRG.624:MSTRG.11386:MSTRG.22087:MSTRG.10044:MSTRG.5025	hinfp-1:hinfp-2:rest-1:zfp674:znf-1:znf91:znf333-1:znf652:zscan2-2:zscan2-6
29137	dd_Smes_g4_1	14876044	14876063	CTCF_MA0139.1	3.97555	-	dd_Smes_g4_1	14874776	14880868	7.51423	1	MSTRG.4288:MSTRG.4289:MSTRG.22163:MSTRG.16827:MSTRG.9571:MSTRG.624:MSTRG.11386:MSTRG.22087:MSTRG.10044:MSTRG.5025	hinfp-1:hinfp-2:rest-1:zfp674:znf-1:znf91:znf333-1:znf652:zscan2-2:zscan2-6
29168	dd_Smes_g4_10	964679	964698	CTCF_MA0139.1	4.52121	-	dd_Smes_g4_10	963611	966656	9.58399	1	MSTRG.4288:MSTRG.4289:MSTRG.22163:MSTRG.16827:MSTRG.9571:MSTRG.624:MSTRG.11386:MSTRG.22087:MSTRG.10044:MSTRG.5025	hinfp-1:hinfp-2:rest-1:zfp674:znf-1:znf91:znf333-1:znf652:zscan2-2:zscan2-6
29171	dd_Smes_g4_10	1001919	1001938	CTCF_MA0139.1	4.12852	+	dd_Smes_g4_10	1000945	1002946	7.66531	1	MSTRG.4288:MSTRG.4289:MSTRG.22163:MSTRG.16827:MSTRG.9571:MSTRG.624:MSTRG.11386:MSTRG.22087:MSTRG.10044:MSTRG.5025	hinfp-1:hinfp-2:rest-1:zfp674:znf-1:znf91:znf333-1:znf652:zscan2-2:zscan2-6
29185	dd_Smes_g4_10	3132822	3132841	CTCF_MA0139.1	4.29028	+	dd_Smes_g4_10	3131925	3134028	7.9868	1	MSTRG.4288:MSTRG.4289:MSTRG.22163:MSTRG.16827:MSTRG.9571:MSTRG.624:MSTRG.11386:MSTRG.22087:MSTRG.10044:MSTRG.5025	hinfp-1:hinfp-2:rest-1:zfp674:znf-1:znf91:znf333-1:znf652:zscan2-2:zscan2-6
29203	dd_Smes_g4_10	4303689	4303708	CTCF_MA0139.1	4.37197	-	dd_Smes_g4_10	4302932	4304933	8.98917	1	MSTRG.4288:MSTRG.4289:MSTRG.22163:MSTRG.16827:MSTRG.9571:MSTRG.624:MSTRG.11386:MSTRG.22087:MSTRG.10044:MSTRG.5025	hinfp-1:hinfp-2:rest-1:zfp674:znf-1:znf91:znf333-1:znf652:zscan2-2:zscan2-6
29223	dd_Smes_g4_10	7288134	7288153	CTCF_MA0139.1	6.31381	+	dd_Smes_g4_10	7286399	7289582	10.2612	1	MSTRG.4288:MSTRG.4289:MSTRG.22163:MSTRG.16827:MSTRG.9571:MSTRG.624:MSTRG.11386:MSTRG.22087:MSTRG.10044:MSTRG.5025	hinfp-1:hinfp-2:rest-1:zfp674:znf-1:znf91:znf333-1:znf652:zscan2-2:zscan2-6
29224	dd_Smes_g4_10	7288686	7288705	CTCF_MA0139.1	6.75401	+	dd_Smes_g4_10	7286399	7289582	9.69973	1	MSTRG.4288:MSTRG.4289:MSTRG.22163:MSTRG.16827:MSTRG.9571:MSTRG.624:MSTRG.11386:MSTRG.22087:MSTRG.10044:MSTRG.5025	hinfp-1:hinfp-2:rest-1:zfp674:znf-1:znf91:znf333-1:znf652:zscan2-2:zscan2-6
29230	dd_Smes_g4_100	777997	778016	CTCF_MA0139.1	5.26843	+	dd_Smes_g4_100	776999	779000	9.5761	1	MSTRG.4288:MSTRG.4289:MSTRG.22163:MSTRG.16827:MSTRG.9571:MSTRG.624:MSTRG.11386:MSTRG.22087:MSTRG.10044:MSTRG.5025	hinfp-1:hinfp-2:rest-1:zfp674:znf-1:znf91:znf333-1:znf652:zscan2-2:zscan2-6
29245	dd_Smes_g4_101	631667	631686	CTCF_MA0139.1	9.5145	-	dd_Smes_g4_101	630513	632514	7.76616	1	MSTRG.4288:MSTRG.4289:MSTRG.22163:MSTRG.16827:MSTRG.9571:MSTRG.624:MSTRG.11386:MSTRG.22087:MSTRG.10044:MSTRG.5025	hinfp-1:hinfp-2:rest-1:zfp674:znf-1:znf91:znf333-1:znf652:zscan2-2:zscan2-6
29246	dd_Smes_g4_101	631687	631706	CTCF_MA0139.1	6.05393	-	dd_Smes_g4_101	630513	632514	7.76616	1	MSTRG.4288:MSTRG.4289:MSTRG.22163:MSTRG.16827:MSTRG.9571:MSTRG.624:MSTRG.11386:MSTRG.22087:MSTRG.10044:MSTRG.5025	hinfp-1:hinfp-2:rest-1:zfp674:znf-1:znf91:znf333-1:znf652:zscan2-2:zscan2-6
29258	dd_Smes_g4_101	1648001	1648020	CTCF_MA0139.1	4.28194	+	dd_Smes_g4_101	1647170	1649171	7.7653	1	MSTRG.4288:MSTRG.4289:MSTRG.22163:MSTRG.16827:MSTRG.9571:MSTRG.624:MSTRG.11386:MSTRG.22087:MSTRG.10044:MSTRG.5025	hinfp-1:hinfp-2:rest-1:zfp674:znf-1:znf91:znf333-1:znf652:zscan2-2:zscan2-6
29259	dd_Smes_g4_101	1648026	1648045	CTCF_MA0139.1	5.70591	+	dd_Smes_g4_101	1647170	1649171	7.96165	1	MSTRG.4288:MSTRG.4289:MSTRG.22163:MSTRG.16827:MSTRG.9571:MSTRG.624:MSTRG.11386:MSTRG.22087:MSTRG.10044:MSTRG.5025	hinfp-1:hinfp-2:rest-1:zfp674:znf-1:znf91:znf333-1:znf652:zscan2-2:zscan2-6
29261	dd_Smes_g4_101	1648116	1648135	CTCF_MA0139.1	7.28304	+	dd_Smes_g4_101	1647170	1649171	7.59352	1	MSTRG.4288:MSTRG.4289:MSTRG.22163:MSTRG.16827:MSTRG.9571:MSTRG.624:MSTRG.11386:MSTRG.22087:MSTRG.10044:MSTRG.5025	hinfp-1:hinfp-2:rest-1:zfp674:znf-1:znf91:znf333-1:znf652:zscan2-2:zscan2-6
29271	dd_Smes_g4_103	400378	400397	CTCF_MA0139.1	5.68082	-	dd_Smes_g4_103	399399	401400	7.87789	1	MSTRG.4288:MSTRG.4289:MSTRG.22163:MSTRG.16827:MSTRG.9571:MSTRG.624:MSTRG.11386:MSTRG.22087:MSTRG.10044:MSTRG.5025	hinfp-1:hinfp-2:rest-1:zfp674:znf-1:znf91:znf333-1:znf652:zscan2-2:zscan2-6
29316	dd_Smes_g4_108	246756	246775	CTCF_MA0139.1	7.21918	-	dd_Smes_g4_108	246534	251764	10.9544	1	MSTRG.4288:MSTRG.4289:MSTRG.22163:MSTRG.16827:MSTRG.9571:MSTRG.624:MSTRG.11386:MSTRG.22087:MSTRG.10044:MSTRG.5025	hinfp-1:hinfp-2:rest-1:zfp674:znf-1:znf91:znf333-1:znf652:zscan2-2:zscan2-6
29318	dd_Smes_g4_108	249056	249075	CTCF_MA0139.1	5.61102	+	dd_Smes_g4_108	246534	251764	8.20193	1	MSTRG.4288:MSTRG.4289:MSTRG.22163:MSTRG.16827:MSTRG.9571:MSTRG.624:MSTRG.11386:MSTRG.22087:MSTRG.10044:MSTRG.5025	hinfp-1:hinfp-2:rest-1:zfp674:znf-1:znf91:znf333-1:znf652:zscan2-2:zscan2-6
29322	dd_Smes_g4_108	250583	250602	CTCF_MA0139.1	5.8985	+	dd_Smes_g4_108	246534	251764	9.10894	1	MSTRG.4288:MSTRG.4289:MSTRG.22163:MSTRG.16827:MSTRG.9571:MSTRG.624:MSTRG.11386:MSTRG.22087:MSTRG.10044:MSTRG.5025	hinfp-1:hinfp-2:rest-1:zfp674:znf-1:znf91:znf333-1:znf652:zscan2-2:zscan2-6
29362	dd_Smes_g4_109	2110374	2110393	CTCF_MA0139.1	8.58434	-	dd_Smes_g4_109	2109339	2111340	8.28827	1	MSTRG.4288:MSTRG.4289:MSTRG.22163:MSTRG.16827:MSTRG.9571:MSTRG.624:MSTRG.11386:MSTRG.22087:MSTRG.10044:MSTRG.5025	hinfp-1:hinfp-2:rest-1:zfp674:znf-1:znf91:znf333-1:znf652:zscan2-2:zscan2-6
29391	dd_Smes_g4_11	5440134	5440153	CTCF_MA0139.1	7.4933	-	dd_Smes_g4_11	5439289	5441290	7.52828	1	MSTRG.4288:MSTRG.4289:MSTRG.22163:MSTRG.16827:MSTRG.9571:MSTRG.624:MSTRG.11386:MSTRG.22087:MSTRG.10044:MSTRG.5025	hinfp-1:hinfp-2:rest-1:zfp674:znf-1:znf91:znf333-1:znf652:zscan2-2:zscan2-6
29408	dd_Smes_g4_110	194467	194486	CTCF_MA0139.1	7.8373	+	dd_Smes_g4_110	193322	195323	13.0331	1	MSTRG.4288:MSTRG.4289:MSTRG.22163:MSTRG.16827:MSTRG.9571:MSTRG.624:MSTRG.11386:MSTRG.22087:MSTRG.10044:MSTRG.5025	hinfp-1:hinfp-2:rest-1:zfp674:znf-1:znf91:znf333-1:znf652:zscan2-2:zscan2-6
29413	dd_Smes_g4_110	484586	484605	CTCF_MA0139.1	8.65916	+	dd_Smes_g4_110	483532	485533	8.15816	1	MSTRG.4288:MSTRG.4289:MSTRG.22163:MSTRG.16827:MSTRG.9571:MSTRG.624:MSTRG.11386:MSTRG.22087:MSTRG.10044:MSTRG.5025	hinfp-1:hinfp-2:rest-1:zfp674:znf-1:znf91:znf333-1:znf652:zscan2-2:zscan2-6
29415	dd_Smes_g4_110	485310	485329	CTCF_MA0139.1	5.72505	-	dd_Smes_g4_110	483532	485533	8.47154	1	MSTRG.4288:MSTRG.4289:MSTRG.22163:MSTRG.16827:MSTRG.9571:MSTRG.624:MSTRG.11386:MSTRG.22087:MSTRG.10044:MSTRG.5025	hinfp-1:hinfp-2:rest-1:zfp674:znf-1:znf91:znf333-1:znf652:zscan2-2:zscan2-6
29435	dd_Smes_g4_110	1486629	1486648	CTCF_MA0139.1	5.2008	-	dd_Smes_g4_110	1486216	1489832	8.33179	1	MSTRG.4288:MSTRG.4289:MSTRG.22163:MSTRG.16827:MSTRG.9571:MSTRG.624:MSTRG.11386:MSTRG.22087:MSTRG.10044:MSTRG.5025	hinfp-1:hinfp-2:rest-1:zfp674:znf-1:znf91:znf333-1:znf652:zscan2-2:zscan2-6
29449	dd_Smes_g4_110	1664654	1664673	CTCF_MA0139.1	6.22393	-	dd_Smes_g4_110	1663629	1666267	7.52902	1	MSTRG.4288:MSTRG.4289:MSTRG.22163:MSTRG.16827:MSTRG.9571:MSTRG.624:MSTRG.11386:MSTRG.22087:MSTRG.10044:MSTRG.5025	hinfp-1:hinfp-2:rest-1:zfp674:znf-1:znf91:znf333-1:znf652:zscan2-2:zscan2-6
29453	dd_Smes_g4_111	208820	208839	CTCF_MA0139.1	5.87572	-	dd_Smes_g4_111	208242	211063	7.43029	1	MSTRG.4288:MSTRG.4289:MSTRG.22163:MSTRG.16827:MSTRG.9571:MSTRG.624:MSTRG.11386:MSTRG.22087:MSTRG.10044:MSTRG.5025	hinfp-1:hinfp-2:rest-1:zfp674:znf-1:znf91:znf333-1:znf652:zscan2-2:zscan2-6
29457	dd_Smes_g4_111	916036	916055	CTCF_MA0139.1	6.1227	+	dd_Smes_g4_111	915144	917145	7.38195	1	MSTRG.4288:MSTRG.4289:MSTRG.22163:MSTRG.16827:MSTRG.9571:MSTRG.624:MSTRG.11386:MSTRG.22087:MSTRG.10044:MSTRG.5025	hinfp-1:hinfp-2:rest-1:zfp674:znf-1:znf91:znf333-1:znf652:zscan2-2:zscan2-6
29460	dd_Smes_g4_111	1144685	1144704	CTCF_MA0139.1	8.44175	-	dd_Smes_g4_111	1143333	1145334	9.52122	1	MSTRG.4288:MSTRG.4289:MSTRG.22163:MSTRG.16827:MSTRG.9571:MSTRG.624:MSTRG.11386:MSTRG.22087:MSTRG.10044:MSTRG.5025	hinfp-1:hinfp-2:rest-1:zfp674:znf-1:znf91:znf333-1:znf652:zscan2-2:zscan2-6
29467	dd_Smes_g4_111	1403808	1403827	CTCF_MA0139.1	4.06592	+	dd_Smes_g4_111	1402775	1405020	7.40679	1	MSTRG.4288:MSTRG.4289:MSTRG.22163:MSTRG.16827:MSTRG.9571:MSTRG.624:MSTRG.11386:MSTRG.22087:MSTRG.10044:MSTRG.5025	hinfp-1:hinfp-2:rest-1:zfp674:znf-1:znf91:znf333-1:znf652:zscan2-2:zscan2-6
29474	dd_Smes_g4_112	935899	935918	CTCF_MA0139.1	4.92994	+	dd_Smes_g4_112	935661	938503	10.7353	1	MSTRG.4288:MSTRG.4289:MSTRG.22163:MSTRG.16827:MSTRG.9571:MSTRG.624:MSTRG.11386:MSTRG.22087:MSTRG.10044:MSTRG.5025	hinfp-1:hinfp-2:rest-1:zfp674:znf-1:znf91:znf333-1:znf652:zscan2-2:zscan2-6
29475	dd_Smes_g4_112	936210	936229	CTCF_MA0139.1	5.63416	-	dd_Smes_g4_112	935661	938503	8.16472	1	MSTRG.4288:MSTRG.4289:MSTRG.22163:MSTRG.16827:MSTRG.9571:MSTRG.624:MSTRG.11386:MSTRG.22087:MSTRG.10044:MSTRG.5025	hinfp-1:hinfp-2:rest-1:zfp674:znf-1:znf91:znf333-1:znf652:zscan2-2:zscan2-6
29511	dd_Smes_g4_114	1177496	1177515	CTCF_MA0139.1	4.02287	+	dd_Smes_g4_114	1176714	1179849	7.46205	1	MSTRG.4288:MSTRG.4289:MSTRG.22163:MSTRG.16827:MSTRG.9571:MSTRG.624:MSTRG.11386:MSTRG.22087:MSTRG.10044:MSTRG.5025	hinfp-1:hinfp-2:rest-1:zfp674:znf-1:znf91:znf333-1:znf652:zscan2-2:zscan2-6
29517	dd_Smes_g4_114	1789871	1789890	CTCF_MA0139.1	10.1668	-	dd_Smes_g4_114	1788792	1790793	8.25663	1	MSTRG.4288:MSTRG.4289:MSTRG.22163:MSTRG.16827:MSTRG.9571:MSTRG.624:MSTRG.11386:MSTRG.22087:MSTRG.10044:MSTRG.5025	hinfp-1:hinfp-2:rest-1:zfp674:znf-1:znf91:znf333-1:znf652:zscan2-2:zscan2-6
29531	dd_Smes_g4_116	731239	731258	CTCF_MA0139.1	6.21794	+	dd_Smes_g4_116	729840	731841	8.32228	1	MSTRG.4288:MSTRG.4289:MSTRG.22163:MSTRG.16827:MSTRG.9571:MSTRG.624:MSTRG.11386:MSTRG.22087:MSTRG.10044:MSTRG.5025	hinfp-1:hinfp-2:rest-1:zfp674:znf-1:znf91:znf333-1:znf652:zscan2-2:zscan2-6
29608	dd_Smes_g4_12	5057837	5057856	CTCF_MA0139.1	4.71286	+	dd_Smes_g4_12	5056941	5059926	8.68832	1	MSTRG.4288:MSTRG.4289:MSTRG.22163:MSTRG.16827:MSTRG.9571:MSTRG.624:MSTRG.11386:MSTRG.22087:MSTRG.10044:MSTRG.5025	hinfp-1:hinfp-2:rest-1:zfp674:znf-1:znf91:znf333-1:znf652:zscan2-2:zscan2-6
29631	dd_Smes_g4_125	1047309	1047328	CTCF_MA0139.1	4.81183	+	dd_Smes_g4_125	1046158	1050405	9.47797	1	MSTRG.4288:MSTRG.4289:MSTRG.22163:MSTRG.16827:MSTRG.9571:MSTRG.624:MSTRG.11386:MSTRG.22087:MSTRG.10044:MSTRG.5025	hinfp-1:hinfp-2:rest-1:zfp674:znf-1:znf91:znf333-1:znf652:zscan2-2:zscan2-6
29632	dd_Smes_g4_125	1047644	1047663	CTCF_MA0139.1	6.392	-	dd_Smes_g4_125	1046158	1050405	9.25305	1	MSTRG.4288:MSTRG.4289:MSTRG.22163:MSTRG.16827:MSTRG.9571:MSTRG.624:MSTRG.11386:MSTRG.22087:MSTRG.10044:MSTRG.5025	hinfp-1:hinfp-2:rest-1:zfp674:znf-1:znf91:znf333-1:znf652:zscan2-2:zscan2-6
29637	dd_Smes_g4_125	1067007	1067026	CTCF_MA0139.1	8.26091	-	dd_Smes_g4_125	1065957	1069998	8.10584	1	MSTRG.4288:MSTRG.4289:MSTRG.22163:MSTRG.16827:MSTRG.9571:MSTRG.624:MSTRG.11386:MSTRG.22087:MSTRG.10044:MSTRG.5025	hinfp-1:hinfp-2:rest-1:zfp674:znf-1:znf91:znf333-1:znf652:zscan2-2:zscan2-6
29638	dd_Smes_g4_125	1067142	1067161	CTCF_MA0139.1	8.25754	-	dd_Smes_g4_125	1065957	1069998	9.97715	1	MSTRG.4288:MSTRG.4289:MSTRG.22163:MSTRG.16827:MSTRG.9571:MSTRG.624:MSTRG.11386:MSTRG.22087:MSTRG.10044:MSTRG.5025	hinfp-1:hinfp-2:rest-1:zfp674:znf-1:znf91:znf333-1:znf652:zscan2-2:zscan2-6
29716	dd_Smes_g4_13	2271521	2271540	CTCF_MA0139.1	6.0435	+	dd_Smes_g4_13	2269894	2272075	8.82159	1	MSTRG.4288:MSTRG.4289:MSTRG.22163:MSTRG.16827:MSTRG.9571:MSTRG.624:MSTRG.11386:MSTRG.22087:MSTRG.10044:MSTRG.5025	hinfp-1:hinfp-2:rest-1:zfp674:znf-1:znf91:znf333-1:znf652:zscan2-2:zscan2-6
29746	dd_Smes_g4_13	7393276	7393295	CTCF_MA0139.1	4.31905	-	dd_Smes_g4_13	7392259	7394775	8.40167	1	MSTRG.4288:MSTRG.4289:MSTRG.22163:MSTRG.16827:MSTRG.9571:MSTRG.624:MSTRG.11386:MSTRG.22087:MSTRG.10044:MSTRG.5025	hinfp-1:hinfp-2:rest-1:zfp674:znf-1:znf91:znf333-1:znf652:zscan2-2:zscan2-6
29749	dd_Smes_g4_13	7684197	7684216	CTCF_MA0139.1	5.09427	-	dd_Smes_g4_13	7683214	7685215	8.3501	1	MSTRG.4288:MSTRG.4289:MSTRG.22163:MSTRG.16827:MSTRG.9571:MSTRG.624:MSTRG.11386:MSTRG.22087:MSTRG.10044:MSTRG.5025	hinfp-1:hinfp-2:rest-1:zfp674:znf-1:znf91:znf333-1:znf652:zscan2-2:zscan2-6
29797	dd_Smes_g4_131	846304	846323	CTCF_MA0139.1	4.80893	+	dd_Smes_g4_131	845491	847492	8.28014	1	MSTRG.4288:MSTRG.4289:MSTRG.22163:MSTRG.16827:MSTRG.9571:MSTRG.624:MSTRG.11386:MSTRG.22087:MSTRG.10044:MSTRG.5025	hinfp-1:hinfp-2:rest-1:zfp674:znf-1:znf91:znf333-1:znf652:zscan2-2:zscan2-6
29814	dd_Smes_g4_131	1417668	1417687	CTCF_MA0139.1	5.54354	-	dd_Smes_g4_131	1415487	1421818	9.58566	1	MSTRG.4288:MSTRG.4289:MSTRG.22163:MSTRG.16827:MSTRG.9571:MSTRG.624:MSTRG.11386:MSTRG.22087:MSTRG.10044:MSTRG.5025	hinfp-1:hinfp-2:rest-1:zfp674:znf-1:znf91:znf333-1:znf652:zscan2-2:zscan2-6
29830	dd_Smes_g4_131	1685561	1685580	CTCF_MA0139.1	3.93235	-	dd_Smes_g4_131	1684914	1687289	9.22714	1	MSTRG.4288:MSTRG.4289:MSTRG.22163:MSTRG.16827:MSTRG.9571:MSTRG.624:MSTRG.11386:MSTRG.22087:MSTRG.10044:MSTRG.5025	hinfp-1:hinfp-2:rest-1:zfp674:znf-1:znf91:znf333-1:znf652:zscan2-2:zscan2-6
29831	dd_Smes_g4_131	1685593	1685612	CTCF_MA0139.1	5.21571	-	dd_Smes_g4_131	1684914	1687289	7.66931	1	MSTRG.4288:MSTRG.4289:MSTRG.22163:MSTRG.16827:MSTRG.9571:MSTRG.624:MSTRG.11386:MSTRG.22087:MSTRG.10044:MSTRG.5025	hinfp-1:hinfp-2:rest-1:zfp674:znf-1:znf91:znf333-1:znf652:zscan2-2:zscan2-6
29832	dd_Smes_g4_131	1685943	1685962	CTCF_MA0139.1	4.65489	-	dd_Smes_g4_131	1684914	1687289	7.39352	1	MSTRG.4288:MSTRG.4289:MSTRG.22163:MSTRG.16827:MSTRG.9571:MSTRG.624:MSTRG.11386:MSTRG.22087:MSTRG.10044:MSTRG.5025	hinfp-1:hinfp-2:rest-1:zfp674:znf-1:znf91:znf333-1:znf652:zscan2-2:zscan2-6
29835	dd_Smes_g4_131	1686426	1686445	CTCF_MA0139.1	5.30958	-	dd_Smes_g4_131	1684914	1687289	9.57858	1	MSTRG.4288:MSTRG.4289:MSTRG.22163:MSTRG.16827:MSTRG.9571:MSTRG.624:MSTRG.11386:MSTRG.22087:MSTRG.10044:MSTRG.5025	hinfp-1:hinfp-2:rest-1:zfp674:znf-1:znf91:znf333-1:znf652:zscan2-2:zscan2-6
29843	dd_Smes_g4_132	1181403	1181422	CTCF_MA0139.1	4.10837	+	dd_Smes_g4_132	1177367	1182100	7.88165	1	MSTRG.4288:MSTRG.4289:MSTRG.22163:MSTRG.16827:MSTRG.9571:MSTRG.624:MSTRG.11386:MSTRG.22087:MSTRG.10044:MSTRG.5025	hinfp-1:hinfp-2:rest-1:zfp674:znf-1:znf91:znf333-1:znf652:zscan2-2:zscan2-6
29844	dd_Smes_g4_132	1181434	1181453	CTCF_MA0139.1	5.70943	+	dd_Smes_g4_132	1177367	1182100	7.54375	1	MSTRG.4288:MSTRG.4289:MSTRG.22163:MSTRG.16827:MSTRG.9571:MSTRG.624:MSTRG.11386:MSTRG.22087:MSTRG.10044:MSTRG.5025	hinfp-1:hinfp-2:rest-1:zfp674:znf-1:znf91:znf333-1:znf652:zscan2-2:zscan2-6
29852	dd_Smes_g4_133	485576	485595	CTCF_MA0139.1	4.24986	+	dd_Smes_g4_133	485507	487508	9.15744	1	MSTRG.4288:MSTRG.4289:MSTRG.22163:MSTRG.16827:MSTRG.9571:MSTRG.624:MSTRG.11386:MSTRG.22087:MSTRG.10044:MSTRG.5025	hinfp-1:hinfp-2:rest-1:zfp674:znf-1:znf91:znf333-1:znf652:zscan2-2:zscan2-6
29865	dd_Smes_g4_133	1136753	1136772	CTCF_MA0139.1	4.2772	+	dd_Smes_g4_133	1135620	1137621	8.39898	1	MSTRG.4288:MSTRG.4289:MSTRG.22163:MSTRG.16827:MSTRG.9571:MSTRG.624:MSTRG.11386:MSTRG.22087:MSTRG.10044:MSTRG.5025	hinfp-1:hinfp-2:rest-1:zfp674:znf-1:znf91:znf333-1:znf652:zscan2-2:zscan2-6
29874	dd_Smes_g4_133	1427716	1427735	CTCF_MA0139.1	5.36096	+	dd_Smes_g4_133	1426901	1428902	7.6076	1	MSTRG.4288:MSTRG.4289:MSTRG.22163:MSTRG.16827:MSTRG.9571:MSTRG.624:MSTRG.11386:MSTRG.22087:MSTRG.10044:MSTRG.5025	hinfp-1:hinfp-2:rest-1:zfp674:znf-1:znf91:znf333-1:znf652:zscan2-2:zscan2-6
29884	dd_Smes_g4_133	1454419	1454438	CTCF_MA0139.1	3.88459	-	dd_Smes_g4_133	1453547	1455646	7.62961	1	MSTRG.4288:MSTRG.4289:MSTRG.22163:MSTRG.16827:MSTRG.9571:MSTRG.624:MSTRG.11386:MSTRG.22087:MSTRG.10044:MSTRG.5025	hinfp-1:hinfp-2:rest-1:zfp674:znf-1:znf91:znf333-1:znf652:zscan2-2:zscan2-6
29959	dd_Smes_g4_134	953842	953861	CTCF_MA0139.1	4.52999	-	dd_Smes_g4_134	952846	954847	7.84271	1	MSTRG.4288:MSTRG.4289:MSTRG.22163:MSTRG.16827:MSTRG.9571:MSTRG.624:MSTRG.11386:MSTRG.22087:MSTRG.10044:MSTRG.5025	hinfp-1:hinfp-2:rest-1:zfp674:znf-1:znf91:znf333-1:znf652:zscan2-2:zscan2-6
29960	dd_Smes_g4_134	954159	954178	CTCF_MA0139.1	5.37369	+	dd_Smes_g4_134	952846	954847	7.45612	1	MSTRG.4288:MSTRG.4289:MSTRG.22163:MSTRG.16827:MSTRG.9571:MSTRG.624:MSTRG.11386:MSTRG.22087:MSTRG.10044:MSTRG.5025	hinfp-1:hinfp-2:rest-1:zfp674:znf-1:znf91:znf333-1:znf652:zscan2-2:zscan2-6
29963	dd_Smes_g4_134	1056198	1056217	CTCF_MA0139.1	5.70971	-	dd_Smes_g4_134	1055204	1057665	7.37681	1	MSTRG.4288:MSTRG.4289:MSTRG.22163:MSTRG.16827:MSTRG.9571:MSTRG.624:MSTRG.11386:MSTRG.22087:MSTRG.10044:MSTRG.5025	hinfp-1:hinfp-2:rest-1:zfp674:znf-1:znf91:znf333-1:znf652:zscan2-2:zscan2-6
29966	dd_Smes_g4_134	1056580	1056599	CTCF_MA0139.1	5.63194	+	dd_Smes_g4_134	1055204	1057665	11.1601	1	MSTRG.4288:MSTRG.4289:MSTRG.22163:MSTRG.16827:MSTRG.9571:MSTRG.624:MSTRG.11386:MSTRG.22087:MSTRG.10044:MSTRG.5025	hinfp-1:hinfp-2:rest-1:zfp674:znf-1:znf91:znf333-1:znf652:zscan2-2:zscan2-6
29975	dd_Smes_g4_134	1177892	1177911	CTCF_MA0139.1	4.2396	-	dd_Smes_g4_134	1176085	1180208	8.22942	1	MSTRG.4288:MSTRG.4289:MSTRG.22163:MSTRG.16827:MSTRG.9571:MSTRG.624:MSTRG.11386:MSTRG.22087:MSTRG.10044:MSTRG.5025	hinfp-1:hinfp-2:rest-1:zfp674:znf-1:znf91:znf333-1:znf652:zscan2-2:zscan2-6
29987	dd_Smes_g4_134	1229817	1229836	CTCF_MA0139.1	5.2805	+	dd_Smes_g4_134	1228304	1230343	7.81685	1	MSTRG.4288:MSTRG.4289:MSTRG.22163:MSTRG.16827:MSTRG.9571:MSTRG.624:MSTRG.11386:MSTRG.22087:MSTRG.10044:MSTRG.5025	hinfp-1:hinfp-2:rest-1:zfp674:znf-1:znf91:znf333-1:znf652:zscan2-2:zscan2-6
30000	dd_Smes_g4_134	1416596	1416615	CTCF_MA0139.1	5.3196	-	dd_Smes_g4_134	1415842	1418595	9.42653	1	MSTRG.4288:MSTRG.4289:MSTRG.22163:MSTRG.16827:MSTRG.9571:MSTRG.624:MSTRG.11386:MSTRG.22087:MSTRG.10044:MSTRG.5025	hinfp-1:hinfp-2:rest-1:zfp674:znf-1:znf91:znf333-1:znf652:zscan2-2:zscan2-6
30001	dd_Smes_g4_134	1416823	1416842	CTCF_MA0139.1	13.632	+	dd_Smes_g4_134	1415842	1418595	8.20358	1	MSTRG.4288:MSTRG.4289:MSTRG.22163:MSTRG.16827:MSTRG.9571:MSTRG.624:MSTRG.11386:MSTRG.22087:MSTRG.10044:MSTRG.5025	hinfp-1:hinfp-2:rest-1:zfp674:znf-1:znf91:znf333-1:znf652:zscan2-2:zscan2-6
30004	dd_Smes_g4_134	1417276	1417295	CTCF_MA0139.1	4.46927	-	dd_Smes_g4_134	1415842	1418595	8.90811	1	MSTRG.4288:MSTRG.4289:MSTRG.22163:MSTRG.16827:MSTRG.9571:MSTRG.624:MSTRG.11386:MSTRG.22087:MSTRG.10044:MSTRG.5025	hinfp-1:hinfp-2:rest-1:zfp674:znf-1:znf91:znf333-1:znf652:zscan2-2:zscan2-6
30006	dd_Smes_g4_134	1417385	1417404	CTCF_MA0139.1	4.36966	+	dd_Smes_g4_134	1415842	1418595	8.3309	1	MSTRG.4288:MSTRG.4289:MSTRG.22163:MSTRG.16827:MSTRG.9571:MSTRG.624:MSTRG.11386:MSTRG.22087:MSTRG.10044:MSTRG.5025	hinfp-1:hinfp-2:rest-1:zfp674:znf-1:znf91:znf333-1:znf652:zscan2-2:zscan2-6
30009	dd_Smes_g4_134	1417805	1417824	CTCF_MA0139.1	7.01192	+	dd_Smes_g4_134	1415842	1418595	7.59754	1	MSTRG.4288:MSTRG.4289:MSTRG.22163:MSTRG.16827:MSTRG.9571:MSTRG.624:MSTRG.11386:MSTRG.22087:MSTRG.10044:MSTRG.5025	hinfp-1:hinfp-2:rest-1:zfp674:znf-1:znf91:znf333-1:znf652:zscan2-2:zscan2-6
30011	dd_Smes_g4_134	1418072	1418091	CTCF_MA0139.1	3.6941	-	dd_Smes_g4_134	1415842	1418595	9.08341	1	MSTRG.4288:MSTRG.4289:MSTRG.22163:MSTRG.16827:MSTRG.9571:MSTRG.624:MSTRG.11386:MSTRG.22087:MSTRG.10044:MSTRG.5025	hinfp-1:hinfp-2:rest-1:zfp674:znf-1:znf91:znf333-1:znf652:zscan2-2:zscan2-6
30036	dd_Smes_g4_137	1010937	1010956	CTCF_MA0139.1	5.17476	+	dd_Smes_g4_137	1009361	1012065	7.89336	1	MSTRG.4288:MSTRG.4289:MSTRG.22163:MSTRG.16827:MSTRG.9571:MSTRG.624:MSTRG.11386:MSTRG.22087:MSTRG.10044:MSTRG.5025	hinfp-1:hinfp-2:rest-1:zfp674:znf-1:znf91:znf333-1:znf652:zscan2-2:zscan2-6
30039	dd_Smes_g4_137	1435134	1435153	CTCF_MA0139.1	7.50585	-	dd_Smes_g4_137	1433499	1435500	7.62732	1	MSTRG.4288:MSTRG.4289:MSTRG.22163:MSTRG.16827:MSTRG.9571:MSTRG.624:MSTRG.11386:MSTRG.22087:MSTRG.10044:MSTRG.5025	hinfp-1:hinfp-2:rest-1:zfp674:znf-1:znf91:znf333-1:znf652:zscan2-2:zscan2-6
30054	dd_Smes_g4_138	1326910	1326929	CTCF_MA0139.1	5.2362	+	dd_Smes_g4_138	1325790	1327791	7.74549	1	MSTRG.4288:MSTRG.4289:MSTRG.22163:MSTRG.16827:MSTRG.9571:MSTRG.624:MSTRG.11386:MSTRG.22087:MSTRG.10044:MSTRG.5025	hinfp-1:hinfp-2:rest-1:zfp674:znf-1:znf91:znf333-1:znf652:zscan2-2:zscan2-6
30097	dd_Smes_g4_14	3098327	3098346	CTCF_MA0139.1	9.55583	-	dd_Smes_g4_14	3096943	3098944	9.37185	1	MSTRG.4288:MSTRG.4289:MSTRG.22163:MSTRG.16827:MSTRG.9571:MSTRG.624:MSTRG.11386:MSTRG.22087:MSTRG.10044:MSTRG.5025	hinfp-1:hinfp-2:rest-1:zfp674:znf-1:znf91:znf333-1:znf652:zscan2-2:zscan2-6
30106	dd_Smes_g4_14	3659057	3659076	CTCF_MA0139.1	6.60498	-	dd_Smes_g4_14	3658183	3660184	7.65505	1	MSTRG.4288:MSTRG.4289:MSTRG.22163:MSTRG.16827:MSTRG.9571:MSTRG.624:MSTRG.11386:MSTRG.22087:MSTRG.10044:MSTRG.5025	hinfp-1:hinfp-2:rest-1:zfp674:znf-1:znf91:znf333-1:znf652:zscan2-2:zscan2-6
30120	dd_Smes_g4_14	4860738	4860757	CTCF_MA0139.1	5.84642	+	dd_Smes_g4_14	4859852	4861957	8.09185	1	MSTRG.4288:MSTRG.4289:MSTRG.22163:MSTRG.16827:MSTRG.9571:MSTRG.624:MSTRG.11386:MSTRG.22087:MSTRG.10044:MSTRG.5025	hinfp-1:hinfp-2:rest-1:zfp674:znf-1:znf91:znf333-1:znf652:zscan2-2:zscan2-6
30137	dd_Smes_g4_14	5794305	5794324	CTCF_MA0139.1	3.96983	+	dd_Smes_g4_14	5791752	5795187	7.89537	1	MSTRG.4288:MSTRG.4289:MSTRG.22163:MSTRG.16827:MSTRG.9571:MSTRG.624:MSTRG.11386:MSTRG.22087:MSTRG.10044:MSTRG.5025	hinfp-1:hinfp-2:rest-1:zfp674:znf-1:znf91:znf333-1:znf652:zscan2-2:zscan2-6
30145	dd_Smes_g4_14	5938933	5938952	CTCF_MA0139.1	6.41233	-	dd_Smes_g4_14	5937151	5939152	11.0286	1	MSTRG.4288:MSTRG.4289:MSTRG.22163:MSTRG.16827:MSTRG.9571:MSTRG.624:MSTRG.11386:MSTRG.22087:MSTRG.10044:MSTRG.5025	hinfp-1:hinfp-2:rest-1:zfp674:znf-1:znf91:znf333-1:znf652:zscan2-2:zscan2-6
30156	dd_Smes_g4_14	7223163	7223182	CTCF_MA0139.1	6.48064	+	dd_Smes_g4_14	7222479	7224480	8.02913	1	MSTRG.4288:MSTRG.4289:MSTRG.22163:MSTRG.16827:MSTRG.9571:MSTRG.624:MSTRG.11386:MSTRG.22087:MSTRG.10044:MSTRG.5025	hinfp-1:hinfp-2:rest-1:zfp674:znf-1:znf91:znf333-1:znf652:zscan2-2:zscan2-6
30168	dd_Smes_g4_14	7782119	7782138	CTCF_MA0139.1	7.89328	-	dd_Smes_g4_14	7780952	7782953	7.93642	1	MSTRG.4288:MSTRG.4289:MSTRG.22163:MSTRG.16827:MSTRG.9571:MSTRG.624:MSTRG.11386:MSTRG.22087:MSTRG.10044:MSTRG.5025	hinfp-1:hinfp-2:rest-1:zfp674:znf-1:znf91:znf333-1:znf652:zscan2-2:zscan2-6
30215	dd_Smes_g4_145	648172	648191	CTCF_MA0139.1	5.59381	-	dd_Smes_g4_145	646535	648536	7.81163	1	MSTRG.4288:MSTRG.4289:MSTRG.22163:MSTRG.16827:MSTRG.9571:MSTRG.624:MSTRG.11386:MSTRG.22087:MSTRG.10044:MSTRG.5025	hinfp-1:hinfp-2:rest-1:zfp674:znf-1:znf91:znf333-1:znf652:zscan2-2:zscan2-6
30226	dd_Smes_g4_145	1529570	1529589	CTCF_MA0139.1	4.67812	+	dd_Smes_g4_145	1528596	1530597	8.10534	1	MSTRG.4288:MSTRG.4289:MSTRG.22163:MSTRG.16827:MSTRG.9571:MSTRG.624:MSTRG.11386:MSTRG.22087:MSTRG.10044:MSTRG.5025	hinfp-1:hinfp-2:rest-1:zfp674:znf-1:znf91:znf333-1:znf652:zscan2-2:zscan2-6
30259	dd_Smes_g4_15	1170116	1170135	CTCF_MA0139.1	4.72123	+	dd_Smes_g4_15	1169700	1171701	7.59646	1	MSTRG.4288:MSTRG.4289:MSTRG.22163:MSTRG.16827:MSTRG.9571:MSTRG.624:MSTRG.11386:MSTRG.22087:MSTRG.10044:MSTRG.5025	hinfp-1:hinfp-2:rest-1:zfp674:znf-1:znf91:znf333-1:znf652:zscan2-2:zscan2-6
30263	dd_Smes_g4_15	1176175	1176194	CTCF_MA0139.1	4.04897	-	dd_Smes_g4_15	1174545	1177781	8.39823	1	MSTRG.4288:MSTRG.4289:MSTRG.22163:MSTRG.16827:MSTRG.9571:MSTRG.624:MSTRG.11386:MSTRG.22087:MSTRG.10044:MSTRG.5025	hinfp-1:hinfp-2:rest-1:zfp674:znf-1:znf91:znf333-1:znf652:zscan2-2:zscan2-6
30286	dd_Smes_g4_15	2851012	2851031	CTCF_MA0139.1	5.18775	+	dd_Smes_g4_15	2850206	2852207	7.70775	1	MSTRG.4288:MSTRG.4289:MSTRG.22163:MSTRG.16827:MSTRG.9571:MSTRG.624:MSTRG.11386:MSTRG.22087:MSTRG.10044:MSTRG.5025	hinfp-1:hinfp-2:rest-1:zfp674:znf-1:znf91:znf333-1:znf652:zscan2-2:zscan2-6
30337	dd_Smes_g4_15	5518180	5518199	CTCF_MA0139.1	13.5706	+	dd_Smes_g4_15	5517550	5519551	9.87615	1	MSTRG.4288:MSTRG.4289:MSTRG.22163:MSTRG.16827:MSTRG.9571:MSTRG.624:MSTRG.11386:MSTRG.22087:MSTRG.10044:MSTRG.5025	hinfp-1:hinfp-2:rest-1:zfp674:znf-1:znf91:znf333-1:znf652:zscan2-2:zscan2-6
30357	dd_Smes_g4_15	6213911	6213930	CTCF_MA0139.1	3.73223	-	dd_Smes_g4_15	6212383	6214384	7.95982	1	MSTRG.4288:MSTRG.4289:MSTRG.22163:MSTRG.16827:MSTRG.9571:MSTRG.624:MSTRG.11386:MSTRG.22087:MSTRG.10044:MSTRG.5025	hinfp-1:hinfp-2:rest-1:zfp674:znf-1:znf91:znf333-1:znf652:zscan2-2:zscan2-6
30400	dd_Smes_g4_15	7103424	7103443	CTCF_MA0139.1	4.09362	+	dd_Smes_g4_15	7101015	7105970	7.60698	1	MSTRG.4288:MSTRG.4289:MSTRG.22163:MSTRG.16827:MSTRG.9571:MSTRG.624:MSTRG.11386:MSTRG.22087:MSTRG.10044:MSTRG.5025	hinfp-1:hinfp-2:rest-1:zfp674:znf-1:znf91:znf333-1:znf652:zscan2-2:zscan2-6
30425	dd_Smes_g4_15	7328128	7328147	CTCF_MA0139.1	6.32927	-	dd_Smes_g4_15	7326581	7328582	10.4776	1	MSTRG.4288:MSTRG.4289:MSTRG.22163:MSTRG.16827:MSTRG.9571:MSTRG.624:MSTRG.11386:MSTRG.22087:MSTRG.10044:MSTRG.5025	hinfp-1:hinfp-2:rest-1:zfp674:znf-1:znf91:znf333-1:znf652:zscan2-2:zscan2-6
30428	dd_Smes_g4_15	7337487	7337506	CTCF_MA0139.1	6.71444	-	dd_Smes_g4_15	7334382	7339739	7.6308	1	MSTRG.4288:MSTRG.4289:MSTRG.22163:MSTRG.16827:MSTRG.9571:MSTRG.624:MSTRG.11386:MSTRG.22087:MSTRG.10044:MSTRG.5025	hinfp-1:hinfp-2:rest-1:zfp674:znf-1:znf91:znf333-1:znf652:zscan2-2:zscan2-6
30434	dd_Smes_g4_15	7474176	7474195	CTCF_MA0139.1	4.11566	-	dd_Smes_g4_15	7474148	7476149	7.66159	1	MSTRG.4288:MSTRG.4289:MSTRG.22163:MSTRG.16827:MSTRG.9571:MSTRG.624:MSTRG.11386:MSTRG.22087:MSTRG.10044:MSTRG.5025	hinfp-1:hinfp-2:rest-1:zfp674:znf-1:znf91:znf333-1:znf652:zscan2-2:zscan2-6
30466	dd_Smes_g4_15	7630139	7630158	CTCF_MA0139.1	3.7179	+	dd_Smes_g4_15	7628502	7630503	7.65849	1	MSTRG.4288:MSTRG.4289:MSTRG.22163:MSTRG.16827:MSTRG.9571:MSTRG.624:MSTRG.11386:MSTRG.22087:MSTRG.10044:MSTRG.5025	hinfp-1:hinfp-2:rest-1:zfp674:znf-1:znf91:znf333-1:znf652:zscan2-2:zscan2-6
30468	dd_Smes_g4_15	7698733	7698752	CTCF_MA0139.1	3.6763	+	dd_Smes_g4_15	7696779	7698780	14.7109	1	MSTRG.4288:MSTRG.4289:MSTRG.22163:MSTRG.16827:MSTRG.9571:MSTRG.624:MSTRG.11386:MSTRG.22087:MSTRG.10044:MSTRG.5025	hinfp-1:hinfp-2:rest-1:zfp674:znf-1:znf91:znf333-1:znf652:zscan2-2:zscan2-6
30469	dd_Smes_g4_15	7698760	7698779	CTCF_MA0139.1	4.19268	-	dd_Smes_g4_15	7696779	7698780	14.7109	1	MSTRG.4288:MSTRG.4289:MSTRG.22163:MSTRG.16827:MSTRG.9571:MSTRG.624:MSTRG.11386:MSTRG.22087:MSTRG.10044:MSTRG.5025	hinfp-1:hinfp-2:rest-1:zfp674:znf-1:znf91:znf333-1:znf652:zscan2-2:zscan2-6
30476	dd_Smes_g4_15	7792983	7793002	CTCF_MA0139.1	8.8961	-	dd_Smes_g4_15	7791332	7793333	7.42937	1	MSTRG.4288:MSTRG.4289:MSTRG.22163:MSTRG.16827:MSTRG.9571:MSTRG.624:MSTRG.11386:MSTRG.22087:MSTRG.10044:MSTRG.5025	hinfp-1:hinfp-2:rest-1:zfp674:znf-1:znf91:znf333-1:znf652:zscan2-2:zscan2-6
30493	dd_Smes_g4_150	1464705	1464724	CTCF_MA0139.1	7.66816	+	dd_Smes_g4_150	1464145	1466146	9.69688	1	MSTRG.4288:MSTRG.4289:MSTRG.22163:MSTRG.16827:MSTRG.9571:MSTRG.624:MSTRG.11386:MSTRG.22087:MSTRG.10044:MSTRG.5025	hinfp-1:hinfp-2:rest-1:zfp674:znf-1:znf91:znf333-1:znf652:zscan2-2:zscan2-6
30511	dd_Smes_g4_154	1121197	1121216	CTCF_MA0139.1	5.61358	-	dd_Smes_g4_154	1120088	1122089	8.8259	1	MSTRG.4288:MSTRG.4289:MSTRG.22163:MSTRG.16827:MSTRG.9571:MSTRG.624:MSTRG.11386:MSTRG.22087:MSTRG.10044:MSTRG.5025	hinfp-1:hinfp-2:rest-1:zfp674:znf-1:znf91:znf333-1:znf652:zscan2-2:zscan2-6
30517	dd_Smes_g4_155	293561	293580	CTCF_MA0139.1	5.21197	-	dd_Smes_g4_155	292592	294593	7.56542	1	MSTRG.4288:MSTRG.4289:MSTRG.22163:MSTRG.16827:MSTRG.9571:MSTRG.624:MSTRG.11386:MSTRG.22087:MSTRG.10044:MSTRG.5025	hinfp-1:hinfp-2:rest-1:zfp674:znf-1:znf91:znf333-1:znf652:zscan2-2:zscan2-6
30529	dd_Smes_g4_156	1183925	1183944	CTCF_MA0139.1	4.44355	+	dd_Smes_g4_156	1182668	1184669	8.14542	1	MSTRG.4288:MSTRG.4289:MSTRG.22163:MSTRG.16827:MSTRG.9571:MSTRG.624:MSTRG.11386:MSTRG.22087:MSTRG.10044:MSTRG.5025	hinfp-1:hinfp-2:rest-1:zfp674:znf-1:znf91:znf333-1:znf652:zscan2-2:zscan2-6
30550	dd_Smes_g4_157	495929	495948	CTCF_MA0139.1	4.10492	-	dd_Smes_g4_157	493965	495966	7.59031	1	MSTRG.4288:MSTRG.4289:MSTRG.22163:MSTRG.16827:MSTRG.9571:MSTRG.624:MSTRG.11386:MSTRG.22087:MSTRG.10044:MSTRG.5025	hinfp-1:hinfp-2:rest-1:zfp674:znf-1:znf91:znf333-1:znf652:zscan2-2:zscan2-6
30565	dd_Smes_g4_157	650471	650490	CTCF_MA0139.1	6.16859	+	dd_Smes_g4_157	650232	652233	8.12608	1	MSTRG.4288:MSTRG.4289:MSTRG.22163:MSTRG.16827:MSTRG.9571:MSTRG.624:MSTRG.11386:MSTRG.22087:MSTRG.10044:MSTRG.5025	hinfp-1:hinfp-2:rest-1:zfp674:znf-1:znf91:znf333-1:znf652:zscan2-2:zscan2-6
30589	dd_Smes_g4_157	870869	870888	CTCF_MA0139.1	8.61879	-	dd_Smes_g4_157	868907	870908	7.55231	1	MSTRG.4288:MSTRG.4289:MSTRG.22163:MSTRG.16827:MSTRG.9571:MSTRG.624:MSTRG.11386:MSTRG.22087:MSTRG.10044:MSTRG.5025	hinfp-1:hinfp-2:rest-1:zfp674:znf-1:znf91:znf333-1:znf652:zscan2-2:zscan2-6
30600	dd_Smes_g4_157	892604	892623	CTCF_MA0139.1	4.26834	-	dd_Smes_g4_157	890517	893056	8.67742	1	MSTRG.4288:MSTRG.4289:MSTRG.22163:MSTRG.16827:MSTRG.9571:MSTRG.624:MSTRG.11386:MSTRG.22087:MSTRG.10044:MSTRG.5025	hinfp-1:hinfp-2:rest-1:zfp674:znf-1:znf91:znf333-1:znf652:zscan2-2:zscan2-6
30601	dd_Smes_g4_157	1034531	1034550	CTCF_MA0139.1	9.12361	-	dd_Smes_g4_157	1034475	1036476	7.78916	1	MSTRG.4288:MSTRG.4289:MSTRG.22163:MSTRG.16827:MSTRG.9571:MSTRG.624:MSTRG.11386:MSTRG.22087:MSTRG.10044:MSTRG.5025	hinfp-1:hinfp-2:rest-1:zfp674:znf-1:znf91:znf333-1:znf652:zscan2-2:zscan2-6
30606	dd_Smes_g4_157	1098918	1098937	CTCF_MA0139.1	9.50755	-	dd_Smes_g4_157	1097757	1100946	8.54201	1	MSTRG.4288:MSTRG.4289:MSTRG.22163:MSTRG.16827:MSTRG.9571:MSTRG.624:MSTRG.11386:MSTRG.22087:MSTRG.10044:MSTRG.5025	hinfp-1:hinfp-2:rest-1:zfp674:znf-1:znf91:znf333-1:znf652:zscan2-2:zscan2-6
30619	dd_Smes_g4_157	1286235	1286254	CTCF_MA0139.1	3.7669	-	dd_Smes_g4_157	1285490	1287491	8.048	1	MSTRG.4288:MSTRG.4289:MSTRG.22163:MSTRG.16827:MSTRG.9571:MSTRG.624:MSTRG.11386:MSTRG.22087:MSTRG.10044:MSTRG.5025	hinfp-1:hinfp-2:rest-1:zfp674:znf-1:znf91:znf333-1:znf652:zscan2-2:zscan2-6
30625	dd_Smes_g4_157	1409357	1409376	CTCF_MA0139.1	8.01684	-	dd_Smes_g4_157	1405424	1409507	7.44346	1	MSTRG.4288:MSTRG.4289:MSTRG.22163:MSTRG.16827:MSTRG.9571:MSTRG.624:MSTRG.11386:MSTRG.22087:MSTRG.10044:MSTRG.5025	hinfp-1:hinfp-2:rest-1:zfp674:znf-1:znf91:znf333-1:znf652:zscan2-2:zscan2-6
30627	dd_Smes_g4_157	1443854	1443873	CTCF_MA0139.1	5.46754	+	dd_Smes_g4_157	1443397	1445513	7.82027	1	MSTRG.4288:MSTRG.4289:MSTRG.22163:MSTRG.16827:MSTRG.9571:MSTRG.624:MSTRG.11386:MSTRG.22087:MSTRG.10044:MSTRG.5025	hinfp-1:hinfp-2:rest-1:zfp674:znf-1:znf91:znf333-1:znf652:zscan2-2:zscan2-6
30638	dd_Smes_g4_157	1472740	1472759	CTCF_MA0139.1	5.92282	+	dd_Smes_g4_157	1471581	1473582	7.68618	1	MSTRG.4288:MSTRG.4289:MSTRG.22163:MSTRG.16827:MSTRG.9571:MSTRG.624:MSTRG.11386:MSTRG.22087:MSTRG.10044:MSTRG.5025	hinfp-1:hinfp-2:rest-1:zfp674:znf-1:znf91:znf333-1:znf652:zscan2-2:zscan2-6
30650	dd_Smes_g4_16	948266	948285	CTCF_MA0139.1	6.08073	+	dd_Smes_g4_16	947212	949213	7.60852	1	MSTRG.4288:MSTRG.4289:MSTRG.22163:MSTRG.16827:MSTRG.9571:MSTRG.624:MSTRG.11386:MSTRG.22087:MSTRG.10044:MSTRG.5025	hinfp-1:hinfp-2:rest-1:zfp674:znf-1:znf91:znf333-1:znf652:zscan2-2:zscan2-6
30670	dd_Smes_g4_16	2442455	2442474	CTCF_MA0139.1	5.63514	+	dd_Smes_g4_16	2440333	2443036	7.78016	1	MSTRG.4288:MSTRG.4289:MSTRG.22163:MSTRG.16827:MSTRG.9571:MSTRG.624:MSTRG.11386:MSTRG.22087:MSTRG.10044:MSTRG.5025	hinfp-1:hinfp-2:rest-1:zfp674:znf-1:znf91:znf333-1:znf652:zscan2-2:zscan2-6
30675	dd_Smes_g4_16	3345925	3345944	CTCF_MA0139.1	5.79306	-	dd_Smes_g4_16	3345672	3348469	7.46574	1	MSTRG.4288:MSTRG.4289:MSTRG.22163:MSTRG.16827:MSTRG.9571:MSTRG.624:MSTRG.11386:MSTRG.22087:MSTRG.10044:MSTRG.5025	hinfp-1:hinfp-2:rest-1:zfp674:znf-1:znf91:znf333-1:znf652:zscan2-2:zscan2-6
30728	dd_Smes_g4_164	792535	792554	CTCF_MA0139.1	5.16518	-	dd_Smes_g4_164	790716	794548	11.5708	1	MSTRG.4288:MSTRG.4289:MSTRG.22163:MSTRG.16827:MSTRG.9571:MSTRG.624:MSTRG.11386:MSTRG.22087:MSTRG.10044:MSTRG.5025	hinfp-1:hinfp-2:rest-1:zfp674:znf-1:znf91:znf333-1:znf652:zscan2-2:zscan2-6
30741	dd_Smes_g4_167	410414	410433	CTCF_MA0139.1	5.21223	+	dd_Smes_g4_167	410144	412145	7.45342	1	MSTRG.4288:MSTRG.4289:MSTRG.22163:MSTRG.16827:MSTRG.9571:MSTRG.624:MSTRG.11386:MSTRG.22087:MSTRG.10044:MSTRG.5025	hinfp-1:hinfp-2:rest-1:zfp674:znf-1:znf91:znf333-1:znf652:zscan2-2:zscan2-6
30742	dd_Smes_g4_167	410851	410870	CTCF_MA0139.1	5.32152	-	dd_Smes_g4_167	410144	412145	8.22155	1	MSTRG.4288:MSTRG.4289:MSTRG.22163:MSTRG.16827:MSTRG.9571:MSTRG.624:MSTRG.11386:MSTRG.22087:MSTRG.10044:MSTRG.5025	hinfp-1:hinfp-2:rest-1:zfp674:znf-1:znf91:znf333-1:znf652:zscan2-2:zscan2-6
30754	dd_Smes_g4_17	1060052	1060071	CTCF_MA0139.1	8.04211	-	dd_Smes_g4_17	1058970	1060971	8.53053	1	MSTRG.4288:MSTRG.4289:MSTRG.22163:MSTRG.16827:MSTRG.9571:MSTRG.624:MSTRG.11386:MSTRG.22087:MSTRG.10044:MSTRG.5025	hinfp-1:hinfp-2:rest-1:zfp674:znf-1:znf91:znf333-1:znf652:zscan2-2:zscan2-6
30762	dd_Smes_g4_17	1481653	1481672	CTCF_MA0139.1	5.29837	-	dd_Smes_g4_17	1480754	1482755	8.32841	1	MSTRG.4288:MSTRG.4289:MSTRG.22163:MSTRG.16827:MSTRG.9571:MSTRG.624:MSTRG.11386:MSTRG.22087:MSTRG.10044:MSTRG.5025	hinfp-1:hinfp-2:rest-1:zfp674:znf-1:znf91:znf333-1:znf652:zscan2-2:zscan2-6
30801	dd_Smes_g4_172	209692	209711	CTCF_MA0139.1	4.38616	-	dd_Smes_g4_172	208289	210290	9.18054	1	MSTRG.4288:MSTRG.4289:MSTRG.22163:MSTRG.16827:MSTRG.9571:MSTRG.624:MSTRG.11386:MSTRG.22087:MSTRG.10044:MSTRG.5025	hinfp-1:hinfp-2:rest-1:zfp674:znf-1:znf91:znf333-1:znf652:zscan2-2:zscan2-6
30802	dd_Smes_g4_172	209855	209874	CTCF_MA0139.1	6.10124	-	dd_Smes_g4_172	208289	210290	9.6798	1	MSTRG.4288:MSTRG.4289:MSTRG.22163:MSTRG.16827:MSTRG.9571:MSTRG.624:MSTRG.11386:MSTRG.22087:MSTRG.10044:MSTRG.5025	hinfp-1:hinfp-2:rest-1:zfp674:znf-1:znf91:znf333-1:znf652:zscan2-2:zscan2-6
30803	dd_Smes_g4_172	267657	267676	CTCF_MA0139.1	6.49218	+	dd_Smes_g4_172	267287	270094	7.44356	1	MSTRG.4288:MSTRG.4289:MSTRG.22163:MSTRG.16827:MSTRG.9571:MSTRG.624:MSTRG.11386:MSTRG.22087:MSTRG.10044:MSTRG.5025	hinfp-1:hinfp-2:rest-1:zfp674:znf-1:znf91:znf333-1:znf652:zscan2-2:zscan2-6
30804	dd_Smes_g4_172	268435	268454	CTCF_MA0139.1	4.70161	+	dd_Smes_g4_172	267287	270094	7.65209	1	MSTRG.4288:MSTRG.4289:MSTRG.22163:MSTRG.16827:MSTRG.9571:MSTRG.624:MSTRG.11386:MSTRG.22087:MSTRG.10044:MSTRG.5025	hinfp-1:hinfp-2:rest-1:zfp674:znf-1:znf91:znf333-1:znf652:zscan2-2:zscan2-6
30805	dd_Smes_g4_172	268553	268572	CTCF_MA0139.1	7.28424	+	dd_Smes_g4_172	267287	270094	7.89574	1	MSTRG.4288:MSTRG.4289:MSTRG.22163:MSTRG.16827:MSTRG.9571:MSTRG.624:MSTRG.11386:MSTRG.22087:MSTRG.10044:MSTRG.5025	hinfp-1:hinfp-2:rest-1:zfp674:znf-1:znf91:znf333-1:znf652:zscan2-2:zscan2-6
30808	dd_Smes_g4_172	592520	592539	CTCF_MA0139.1	5.29209	+	dd_Smes_g4_172	590676	594885	9.34759	1	MSTRG.4288:MSTRG.4289:MSTRG.22163:MSTRG.16827:MSTRG.9571:MSTRG.624:MSTRG.11386:MSTRG.22087:MSTRG.10044:MSTRG.5025	hinfp-1:hinfp-2:rest-1:zfp674:znf-1:znf91:znf333-1:znf652:zscan2-2:zscan2-6
30817	dd_Smes_g4_172	704120	704139	CTCF_MA0139.1	3.98358	-	dd_Smes_g4_172	703375	705376	7.53677	1	MSTRG.4288:MSTRG.4289:MSTRG.22163:MSTRG.16827:MSTRG.9571:MSTRG.624:MSTRG.11386:MSTRG.22087:MSTRG.10044:MSTRG.5025	hinfp-1:hinfp-2:rest-1:zfp674:znf-1:znf91:znf333-1:znf652:zscan2-2:zscan2-6
30819	dd_Smes_g4_172	704412	704431	CTCF_MA0139.1	4.32033	+	dd_Smes_g4_172	703375	705376	7.65787	1	MSTRG.4288:MSTRG.4289:MSTRG.22163:MSTRG.16827:MSTRG.9571:MSTRG.624:MSTRG.11386:MSTRG.22087:MSTRG.10044:MSTRG.5025	hinfp-1:hinfp-2:rest-1:zfp674:znf-1:znf91:znf333-1:znf652:zscan2-2:zscan2-6
30844	dd_Smes_g4_172	823428	823447	CTCF_MA0139.1	4.41863	-	dd_Smes_g4_172	823223	825387	8.60496	1	MSTRG.4288:MSTRG.4289:MSTRG.22163:MSTRG.16827:MSTRG.9571:MSTRG.624:MSTRG.11386:MSTRG.22087:MSTRG.10044:MSTRG.5025	hinfp-1:hinfp-2:rest-1:zfp674:znf-1:znf91:znf333-1:znf652:zscan2-2:zscan2-6
30848	dd_Smes_g4_172	824307	824326	CTCF_MA0139.1	9.0702	+	dd_Smes_g4_172	823223	825387	8.61325	1	MSTRG.4288:MSTRG.4289:MSTRG.22163:MSTRG.16827:MSTRG.9571:MSTRG.624:MSTRG.11386:MSTRG.22087:MSTRG.10044:MSTRG.5025	hinfp-1:hinfp-2:rest-1:zfp674:znf-1:znf91:znf333-1:znf652:zscan2-2:zscan2-6
30849	dd_Smes_g4_172	824338	824357	CTCF_MA0139.1	10.2006	-	dd_Smes_g4_172	823223	825387	7.44442	1	MSTRG.4288:MSTRG.4289:MSTRG.22163:MSTRG.16827:MSTRG.9571:MSTRG.624:MSTRG.11386:MSTRG.22087:MSTRG.10044:MSTRG.5025	hinfp-1:hinfp-2:rest-1:zfp674:znf-1:znf91:znf333-1:znf652:zscan2-2:zscan2-6
30854	dd_Smes_g4_172	841044	841063	CTCF_MA0139.1	4.19429	-	dd_Smes_g4_172	840456	842646	8.08024	1	MSTRG.4288:MSTRG.4289:MSTRG.22163:MSTRG.16827:MSTRG.9571:MSTRG.624:MSTRG.11386:MSTRG.22087:MSTRG.10044:MSTRG.5025	hinfp-1:hinfp-2:rest-1:zfp674:znf-1:znf91:znf333-1:znf652:zscan2-2:zscan2-6
30855	dd_Smes_g4_172	841092	841111	CTCF_MA0139.1	7.4574	-	dd_Smes_g4_172	840456	842646	8.3143	1	MSTRG.4288:MSTRG.4289:MSTRG.22163:MSTRG.16827:MSTRG.9571:MSTRG.624:MSTRG.11386:MSTRG.22087:MSTRG.10044:MSTRG.5025	hinfp-1:hinfp-2:rest-1:zfp674:znf-1:znf91:znf333-1:znf652:zscan2-2:zscan2-6
30877	dd_Smes_g4_172	885344	885363	CTCF_MA0139.1	4.09391	-	dd_Smes_g4_172	878072	888187	8.18547	1	MSTRG.4288:MSTRG.4289:MSTRG.22163:MSTRG.16827:MSTRG.9571:MSTRG.624:MSTRG.11386:MSTRG.22087:MSTRG.10044:MSTRG.5025	hinfp-1:hinfp-2:rest-1:zfp674:znf-1:znf91:znf333-1:znf652:zscan2-2:zscan2-6
30878	dd_Smes_g4_172	887088	887107	CTCF_MA0139.1	3.84301	+	dd_Smes_g4_172	878072	888187	8.24916	1	MSTRG.4288:MSTRG.4289:MSTRG.22163:MSTRG.16827:MSTRG.9571:MSTRG.624:MSTRG.11386:MSTRG.22087:MSTRG.10044:MSTRG.5025	hinfp-1:hinfp-2:rest-1:zfp674:znf-1:znf91:znf333-1:znf652:zscan2-2:zscan2-6
30907	dd_Smes_g4_172	967833	967852	CTCF_MA0139.1	9.27169	-	dd_Smes_g4_172	966179	970890	7.42449	1	MSTRG.4288:MSTRG.4289:MSTRG.22163:MSTRG.16827:MSTRG.9571:MSTRG.624:MSTRG.11386:MSTRG.22087:MSTRG.10044:MSTRG.5025	hinfp-1:hinfp-2:rest-1:zfp674:znf-1:znf91:znf333-1:znf652:zscan2-2:zscan2-6
30911	dd_Smes_g4_172	974895	974914	CTCF_MA0139.1	10.9524	-	dd_Smes_g4_172	972613	976453	8.61221	1	MSTRG.4288:MSTRG.4289:MSTRG.22163:MSTRG.16827:MSTRG.9571:MSTRG.624:MSTRG.11386:MSTRG.22087:MSTRG.10044:MSTRG.5025	hinfp-1:hinfp-2:rest-1:zfp674:znf-1:znf91:znf333-1:znf652:zscan2-2:zscan2-6
30912	dd_Smes_g4_172	974927	974946	CTCF_MA0139.1	9.36002	-	dd_Smes_g4_172	972613	976453	8.78905	1	MSTRG.4288:MSTRG.4289:MSTRG.22163:MSTRG.16827:MSTRG.9571:MSTRG.624:MSTRG.11386:MSTRG.22087:MSTRG.10044:MSTRG.5025	hinfp-1:hinfp-2:rest-1:zfp674:znf-1:znf91:znf333-1:znf652:zscan2-2:zscan2-6
30914	dd_Smes_g4_172	975209	975228	CTCF_MA0139.1	4.28695	+	dd_Smes_g4_172	972613	976453	9.65602	1	MSTRG.4288:MSTRG.4289:MSTRG.22163:MSTRG.16827:MSTRG.9571:MSTRG.624:MSTRG.11386:MSTRG.22087:MSTRG.10044:MSTRG.5025	hinfp-1:hinfp-2:rest-1:zfp674:znf-1:znf91:znf333-1:znf652:zscan2-2:zscan2-6
30915	dd_Smes_g4_172	975242	975261	CTCF_MA0139.1	5.76368	+	dd_Smes_g4_172	972613	976453	8.43657	1	MSTRG.4288:MSTRG.4289:MSTRG.22163:MSTRG.16827:MSTRG.9571:MSTRG.624:MSTRG.11386:MSTRG.22087:MSTRG.10044:MSTRG.5025	hinfp-1:hinfp-2:rest-1:zfp674:znf-1:znf91:znf333-1:znf652:zscan2-2:zscan2-6
30921	dd_Smes_g4_172	978158	978177	CTCF_MA0139.1	3.90559	+	dd_Smes_g4_172	976712	979136	8.29761	1	MSTRG.4288:MSTRG.4289:MSTRG.22163:MSTRG.16827:MSTRG.9571:MSTRG.624:MSTRG.11386:MSTRG.22087:MSTRG.10044:MSTRG.5025	hinfp-1:hinfp-2:rest-1:zfp674:znf-1:znf91:znf333-1:znf652:zscan2-2:zscan2-6
30924	dd_Smes_g4_172	978958	978977	CTCF_MA0139.1	5.8269	-	dd_Smes_g4_172	976712	979136	8.23524	1	MSTRG.4288:MSTRG.4289:MSTRG.22163:MSTRG.16827:MSTRG.9571:MSTRG.624:MSTRG.11386:MSTRG.22087:MSTRG.10044:MSTRG.5025	hinfp-1:hinfp-2:rest-1:zfp674:znf-1:znf91:znf333-1:znf652:zscan2-2:zscan2-6
30925	dd_Smes_g4_172	979014	979033	CTCF_MA0139.1	6.51468	-	dd_Smes_g4_172	976712	979136	7.7992	1	MSTRG.4288:MSTRG.4289:MSTRG.22163:MSTRG.16827:MSTRG.9571:MSTRG.624:MSTRG.11386:MSTRG.22087:MSTRG.10044:MSTRG.5025	hinfp-1:hinfp-2:rest-1:zfp674:znf-1:znf91:znf333-1:znf652:zscan2-2:zscan2-6
30938	dd_Smes_g4_172	1149760	1149779	CTCF_MA0139.1	5.19994	-	dd_Smes_g4_172	1145202	1151492	7.8847	1	MSTRG.4288:MSTRG.4289:MSTRG.22163:MSTRG.16827:MSTRG.9571:MSTRG.624:MSTRG.11386:MSTRG.22087:MSTRG.10044:MSTRG.5025	hinfp-1:hinfp-2:rest-1:zfp674:znf-1:znf91:znf333-1:znf652:zscan2-2:zscan2-6
30944	dd_Smes_g4_172	1150904	1150923	CTCF_MA0139.1	9.67999	+	dd_Smes_g4_172	1145202	1151492	7.78505	1	MSTRG.4288:MSTRG.4289:MSTRG.22163:MSTRG.16827:MSTRG.9571:MSTRG.624:MSTRG.11386:MSTRG.22087:MSTRG.10044:MSTRG.5025	hinfp-1:hinfp-2:rest-1:zfp674:znf-1:znf91:znf333-1:znf652:zscan2-2:zscan2-6
30946	dd_Smes_g4_172	1171653	1171672	CTCF_MA0139.1	3.91683	-	dd_Smes_g4_172	1171033	1173158	8.11365	1	MSTRG.4288:MSTRG.4289:MSTRG.22163:MSTRG.16827:MSTRG.9571:MSTRG.624:MSTRG.11386:MSTRG.22087:MSTRG.10044:MSTRG.5025	hinfp-1:hinfp-2:rest-1:zfp674:znf-1:znf91:znf333-1:znf652:zscan2-2:zscan2-6
31023	dd_Smes_g4_18	3804862	3804881	CTCF_MA0139.1	4.6839	-	dd_Smes_g4_18	3803698	3805699	8.08266	1	MSTRG.4288:MSTRG.4289:MSTRG.22163:MSTRG.16827:MSTRG.9571:MSTRG.624:MSTRG.11386:MSTRG.22087:MSTRG.10044:MSTRG.5025	hinfp-1:hinfp-2:rest-1:zfp674:znf-1:znf91:znf333-1:znf652:zscan2-2:zscan2-6
31058	dd_Smes_g4_18	5220357	5220376	CTCF_MA0139.1	3.88714	+	dd_Smes_g4_18	5219408	5222110	7.37825	1	MSTRG.4288:MSTRG.4289:MSTRG.22163:MSTRG.16827:MSTRG.9571:MSTRG.624:MSTRG.11386:MSTRG.22087:MSTRG.10044:MSTRG.5025	hinfp-1:hinfp-2:rest-1:zfp674:znf-1:znf91:znf333-1:znf652:zscan2-2:zscan2-6
31060	dd_Smes_g4_18	5321553	5321572	CTCF_MA0139.1	4.16348	+	dd_Smes_g4_18	5321062	5323222	7.51521	1	MSTRG.4288:MSTRG.4289:MSTRG.22163:MSTRG.16827:MSTRG.9571:MSTRG.624:MSTRG.11386:MSTRG.22087:MSTRG.10044:MSTRG.5025	hinfp-1:hinfp-2:rest-1:zfp674:znf-1:znf91:znf333-1:znf652:zscan2-2:zscan2-6
31089	dd_Smes_g4_18	7213515	7213534	CTCF_MA0139.1	5.90264	+	dd_Smes_g4_18	7211532	7215371	9.63327	1	MSTRG.4288:MSTRG.4289:MSTRG.22163:MSTRG.16827:MSTRG.9571:MSTRG.624:MSTRG.11386:MSTRG.22087:MSTRG.10044:MSTRG.5025	hinfp-1:hinfp-2:rest-1:zfp674:znf-1:znf91:znf333-1:znf652:zscan2-2:zscan2-6
31141	dd_Smes_g4_186	935941	935960	CTCF_MA0139.1	6.57883	+	dd_Smes_g4_186	931928	938875	8.6622	1	MSTRG.4288:MSTRG.4289:MSTRG.22163:MSTRG.16827:MSTRG.9571:MSTRG.624:MSTRG.11386:MSTRG.22087:MSTRG.10044:MSTRG.5025	hinfp-1:hinfp-2:rest-1:zfp674:znf-1:znf91:znf333-1:znf652:zscan2-2:zscan2-6
31161	dd_Smes_g4_189	699116	699135	CTCF_MA0139.1	4.68476	+	dd_Smes_g4_189	697910	707079	8.03983	1	MSTRG.4288:MSTRG.4289:MSTRG.22163:MSTRG.16827:MSTRG.9571:MSTRG.624:MSTRG.11386:MSTRG.22087:MSTRG.10044:MSTRG.5025	hinfp-1:hinfp-2:rest-1:zfp674:znf-1:znf91:znf333-1:znf652:zscan2-2:zscan2-6
31194	dd_Smes_g4_189	872247	872266	CTCF_MA0139.1	5.92923	+	dd_Smes_g4_189	871160	874452	9.54421	1	MSTRG.4288:MSTRG.4289:MSTRG.22163:MSTRG.16827:MSTRG.9571:MSTRG.624:MSTRG.11386:MSTRG.22087:MSTRG.10044:MSTRG.5025	hinfp-1:hinfp-2:rest-1:zfp674:znf-1:znf91:znf333-1:znf652:zscan2-2:zscan2-6
31197	dd_Smes_g4_189	873845	873864	CTCF_MA0139.1	4.85541	+	dd_Smes_g4_189	871160	874452	8.54765	1	MSTRG.4288:MSTRG.4289:MSTRG.22163:MSTRG.16827:MSTRG.9571:MSTRG.624:MSTRG.11386:MSTRG.22087:MSTRG.10044:MSTRG.5025	hinfp-1:hinfp-2:rest-1:zfp674:znf-1:znf91:znf333-1:znf652:zscan2-2:zscan2-6
31203	dd_Smes_g4_19	1046151	1046170	CTCF_MA0139.1	4.72309	+	dd_Smes_g4_19	1044344	1047071	8.19698	1	MSTRG.4288:MSTRG.4289:MSTRG.22163:MSTRG.16827:MSTRG.9571:MSTRG.624:MSTRG.11386:MSTRG.22087:MSTRG.10044:MSTRG.5025	hinfp-1:hinfp-2:rest-1:zfp674:znf-1:znf91:znf333-1:znf652:zscan2-2:zscan2-6
31206	dd_Smes_g4_19	1548157	1548176	CTCF_MA0139.1	4.46691	-	dd_Smes_g4_19	1547024	1549025	7.78581	1	MSTRG.4288:MSTRG.4289:MSTRG.22163:MSTRG.16827:MSTRG.9571:MSTRG.624:MSTRG.11386:MSTRG.22087:MSTRG.10044:MSTRG.5025	hinfp-1:hinfp-2:rest-1:zfp674:znf-1:znf91:znf333-1:znf652:zscan2-2:zscan2-6
31208	dd_Smes_g4_19	1552144	1552163	CTCF_MA0139.1	4.17902	+	dd_Smes_g4_19	1550218	1554331	7.9132	1	MSTRG.4288:MSTRG.4289:MSTRG.22163:MSTRG.16827:MSTRG.9571:MSTRG.624:MSTRG.11386:MSTRG.22087:MSTRG.10044:MSTRG.5025	hinfp-1:hinfp-2:rest-1:zfp674:znf-1:znf91:znf333-1:znf652:zscan2-2:zscan2-6
31209	dd_Smes_g4_19	1555975	1555994	CTCF_MA0139.1	6.14057	-	dd_Smes_g4_19	1555339	1557340	7.65794	1	MSTRG.4288:MSTRG.4289:MSTRG.22163:MSTRG.16827:MSTRG.9571:MSTRG.624:MSTRG.11386:MSTRG.22087:MSTRG.10044:MSTRG.5025	hinfp-1:hinfp-2:rest-1:zfp674:znf-1:znf91:znf333-1:znf652:zscan2-2:zscan2-6
31224	dd_Smes_g4_19	3571364	3571383	CTCF_MA0139.1	5.59555	+	dd_Smes_g4_19	3570506	3572507	9.26276	1	MSTRG.4288:MSTRG.4289:MSTRG.22163:MSTRG.16827:MSTRG.9571:MSTRG.624:MSTRG.11386:MSTRG.22087:MSTRG.10044:MSTRG.5025	hinfp-1:hinfp-2:rest-1:zfp674:znf-1:znf91:znf333-1:znf652:zscan2-2:zscan2-6
31240	dd_Smes_g4_19	5970700	5970719	CTCF_MA0139.1	5.66423	+	dd_Smes_g4_19	5969648	5971649	8.38457	1	MSTRG.4288:MSTRG.4289:MSTRG.22163:MSTRG.16827:MSTRG.9571:MSTRG.624:MSTRG.11386:MSTRG.22087:MSTRG.10044:MSTRG.5025	hinfp-1:hinfp-2:rest-1:zfp674:znf-1:znf91:znf333-1:znf652:zscan2-2:zscan2-6
31273	dd_Smes_g4_195	523315	523334	CTCF_MA0139.1	5.29623	+	dd_Smes_g4_195	522359	524360	7.57829	1	MSTRG.4288:MSTRG.4289:MSTRG.22163:MSTRG.16827:MSTRG.9571:MSTRG.624:MSTRG.11386:MSTRG.22087:MSTRG.10044:MSTRG.5025	hinfp-1:hinfp-2:rest-1:zfp674:znf-1:znf91:znf333-1:znf652:zscan2-2:zscan2-6
31284	dd_Smes_g4_198	59055	59074	CTCF_MA0139.1	7.04991	-	dd_Smes_g4_198	57982	59983	8.05707	1	MSTRG.4288:MSTRG.4289:MSTRG.22163:MSTRG.16827:MSTRG.9571:MSTRG.624:MSTRG.11386:MSTRG.22087:MSTRG.10044:MSTRG.5025	hinfp-1:hinfp-2:rest-1:zfp674:znf-1:znf91:znf333-1:znf652:zscan2-2:zscan2-6
31336	dd_Smes_g4_2	12015419	12015438	CTCF_MA0139.1	4.79307	+	dd_Smes_g4_2	12014876	12016877	7.47755	1	MSTRG.4288:MSTRG.4289:MSTRG.22163:MSTRG.16827:MSTRG.9571:MSTRG.624:MSTRG.11386:MSTRG.22087:MSTRG.10044:MSTRG.5025	hinfp-1:hinfp-2:rest-1:zfp674:znf-1:znf91:znf333-1:znf652:zscan2-2:zscan2-6
31427	dd_Smes_g4_202	134183	134202	CTCF_MA0139.1	7.35065	+	dd_Smes_g4_202	133209	135815	9.381	1	MSTRG.4288:MSTRG.4289:MSTRG.22163:MSTRG.16827:MSTRG.9571:MSTRG.624:MSTRG.11386:MSTRG.22087:MSTRG.10044:MSTRG.5025	hinfp-1:hinfp-2:rest-1:zfp674:znf-1:znf91:znf333-1:znf652:zscan2-2:zscan2-6
31433	dd_Smes_g4_202	269564	269583	CTCF_MA0139.1	4.40984	+	dd_Smes_g4_202	269059	271060	7.42667	1	MSTRG.4288:MSTRG.4289:MSTRG.22163:MSTRG.16827:MSTRG.9571:MSTRG.624:MSTRG.11386:MSTRG.22087:MSTRG.10044:MSTRG.5025	hinfp-1:hinfp-2:rest-1:zfp674:znf-1:znf91:znf333-1:znf652:zscan2-2:zscan2-6
31437	dd_Smes_g4_202	702509	702528	CTCF_MA0139.1	7.51368	+	dd_Smes_g4_202	701647	703648	7.73788	1	MSTRG.4288:MSTRG.4289:MSTRG.22163:MSTRG.16827:MSTRG.9571:MSTRG.624:MSTRG.11386:MSTRG.22087:MSTRG.10044:MSTRG.5025	hinfp-1:hinfp-2:rest-1:zfp674:znf-1:znf91:znf333-1:znf652:zscan2-2:zscan2-6
31455	dd_Smes_g4_207	252098	252117	CTCF_MA0139.1	14.6629	+	dd_Smes_g4_207	250704	252705	7.91732	1	MSTRG.4288:MSTRG.4289:MSTRG.22163:MSTRG.16827:MSTRG.9571:MSTRG.624:MSTRG.11386:MSTRG.22087:MSTRG.10044:MSTRG.5025	hinfp-1:hinfp-2:rest-1:zfp674:znf-1:znf91:znf333-1:znf652:zscan2-2:zscan2-6
31456	dd_Smes_g4_207	252167	252186	CTCF_MA0139.1	3.70079	-	dd_Smes_g4_207	250704	252705	8.03031	1	MSTRG.4288:MSTRG.4289:MSTRG.22163:MSTRG.16827:MSTRG.9571:MSTRG.624:MSTRG.11386:MSTRG.22087:MSTRG.10044:MSTRG.5025	hinfp-1:hinfp-2:rest-1:zfp674:znf-1:znf91:znf333-1:znf652:zscan2-2:zscan2-6
31463	dd_Smes_g4_208	314063	314082	CTCF_MA0139.1	5.06681	+	dd_Smes_g4_208	313072	315073	7.3939	1	MSTRG.4288:MSTRG.4289:MSTRG.22163:MSTRG.16827:MSTRG.9571:MSTRG.624:MSTRG.11386:MSTRG.22087:MSTRG.10044:MSTRG.5025	hinfp-1:hinfp-2:rest-1:zfp674:znf-1:znf91:znf333-1:znf652:zscan2-2:zscan2-6
31485	dd_Smes_g4_21	3054577	3054596	CTCF_MA0139.1	4.93633	-	dd_Smes_g4_21	3053884	3055885	7.44152	1	MSTRG.4288:MSTRG.4289:MSTRG.22163:MSTRG.16827:MSTRG.9571:MSTRG.624:MSTRG.11386:MSTRG.22087:MSTRG.10044:MSTRG.5025	hinfp-1:hinfp-2:rest-1:zfp674:znf-1:znf91:znf333-1:znf652:zscan2-2:zscan2-6
31493	dd_Smes_g4_21	4604898	4604917	CTCF_MA0139.1	6.37853	+	dd_Smes_g4_21	4603645	4605646	8.60605	1	MSTRG.4288:MSTRG.4289:MSTRG.22163:MSTRG.16827:MSTRG.9571:MSTRG.624:MSTRG.11386:MSTRG.22087:MSTRG.10044:MSTRG.5025	hinfp-1:hinfp-2:rest-1:zfp674:znf-1:znf91:znf333-1:znf652:zscan2-2:zscan2-6
31516	dd_Smes_g4_213	237032	237051	CTCF_MA0139.1	5.16584	-	dd_Smes_g4_213	236067	238068	8.22742	1	MSTRG.4288:MSTRG.4289:MSTRG.22163:MSTRG.16827:MSTRG.9571:MSTRG.624:MSTRG.11386:MSTRG.22087:MSTRG.10044:MSTRG.5025	hinfp-1:hinfp-2:rest-1:zfp674:znf-1:znf91:znf333-1:znf652:zscan2-2:zscan2-6
31531	dd_Smes_g4_216	150462	150481	CTCF_MA0139.1	6.81649	-	dd_Smes_g4_216	149595	151596	8.35315	1	MSTRG.4288:MSTRG.4289:MSTRG.22163:MSTRG.16827:MSTRG.9571:MSTRG.624:MSTRG.11386:MSTRG.22087:MSTRG.10044:MSTRG.5025	hinfp-1:hinfp-2:rest-1:zfp674:znf-1:znf91:znf333-1:znf652:zscan2-2:zscan2-6
31588	dd_Smes_g4_219	491479	491498	CTCF_MA0139.1	7.37372	+	dd_Smes_g4_219	488630	492856	8.68712	1	MSTRG.4288:MSTRG.4289:MSTRG.22163:MSTRG.16827:MSTRG.9571:MSTRG.624:MSTRG.11386:MSTRG.22087:MSTRG.10044:MSTRG.5025	hinfp-1:hinfp-2:rest-1:zfp674:znf-1:znf91:znf333-1:znf652:zscan2-2:zscan2-6
31602	dd_Smes_g4_22	793785	793804	CTCF_MA0139.1	3.98646	+	dd_Smes_g4_22	793479	795480	7.86218	1	MSTRG.4288:MSTRG.4289:MSTRG.22163:MSTRG.16827:MSTRG.9571:MSTRG.624:MSTRG.11386:MSTRG.22087:MSTRG.10044:MSTRG.5025	hinfp-1:hinfp-2:rest-1:zfp674:znf-1:znf91:znf333-1:znf652:zscan2-2:zscan2-6
31633	dd_Smes_g4_220	345437	345456	CTCF_MA0139.1	4.48125	+	dd_Smes_g4_220	344497	346498	232.81	1	MSTRG.4288:MSTRG.4289:MSTRG.22163:MSTRG.16827:MSTRG.9571:MSTRG.624:MSTRG.11386:MSTRG.22087:MSTRG.10044:MSTRG.5025	hinfp-1:hinfp-2:rest-1:zfp674:znf-1:znf91:znf333-1:znf652:zscan2-2:zscan2-6
31634	dd_Smes_g4_220	345647	345666	CTCF_MA0139.1	4.48848	+	dd_Smes_g4_220	344497	346498	52.0948	1	MSTRG.4288:MSTRG.4289:MSTRG.22163:MSTRG.16827:MSTRG.9571:MSTRG.624:MSTRG.11386:MSTRG.22087:MSTRG.10044:MSTRG.5025	hinfp-1:hinfp-2:rest-1:zfp674:znf-1:znf91:znf333-1:znf652:zscan2-2:zscan2-6
31640	dd_Smes_g4_221	795842	795861	CTCF_MA0139.1	4.68991	-	dd_Smes_g4_221	794707	797031	7.46111	1	MSTRG.4288:MSTRG.4289:MSTRG.22163:MSTRG.16827:MSTRG.9571:MSTRG.624:MSTRG.11386:MSTRG.22087:MSTRG.10044:MSTRG.5025	hinfp-1:hinfp-2:rest-1:zfp674:znf-1:znf91:znf333-1:znf652:zscan2-2:zscan2-6
31647	dd_Smes_g4_225	439751	439770	CTCF_MA0139.1	10.5328	-	dd_Smes_g4_225	438527	440528	7.6191	1	MSTRG.4288:MSTRG.4289:MSTRG.22163:MSTRG.16827:MSTRG.9571:MSTRG.624:MSTRG.11386:MSTRG.22087:MSTRG.10044:MSTRG.5025	hinfp-1:hinfp-2:rest-1:zfp674:znf-1:znf91:znf333-1:znf652:zscan2-2:zscan2-6
31673	dd_Smes_g4_23	2619699	2619718	CTCF_MA0139.1	4.61853	-	dd_Smes_g4_23	2618749	2620750	7.49036	1	MSTRG.4288:MSTRG.4289:MSTRG.22163:MSTRG.16827:MSTRG.9571:MSTRG.624:MSTRG.11386:MSTRG.22087:MSTRG.10044:MSTRG.5025	hinfp-1:hinfp-2:rest-1:zfp674:znf-1:znf91:znf333-1:znf652:zscan2-2:zscan2-6
31706	dd_Smes_g4_231	402890	402909	CTCF_MA0139.1	8.82924	-	dd_Smes_g4_231	401888	403889	7.80238	1	MSTRG.4288:MSTRG.4289:MSTRG.22163:MSTRG.16827:MSTRG.9571:MSTRG.624:MSTRG.11386:MSTRG.22087:MSTRG.10044:MSTRG.5025	hinfp-1:hinfp-2:rest-1:zfp674:znf-1:znf91:znf333-1:znf652:zscan2-2:zscan2-6
31720	dd_Smes_g4_231	407930	407949	CTCF_MA0139.1	4.49574	-	dd_Smes_g4_231	406859	411405	8.31617	1	MSTRG.4288:MSTRG.4289:MSTRG.22163:MSTRG.16827:MSTRG.9571:MSTRG.624:MSTRG.11386:MSTRG.22087:MSTRG.10044:MSTRG.5025	hinfp-1:hinfp-2:rest-1:zfp674:znf-1:znf91:znf333-1:znf652:zscan2-2:zscan2-6
31724	dd_Smes_g4_231	447977	447996	CTCF_MA0139.1	9.43226	+	dd_Smes_g4_231	447492	449493	8.28177	1	MSTRG.4288:MSTRG.4289:MSTRG.22163:MSTRG.16827:MSTRG.9571:MSTRG.624:MSTRG.11386:MSTRG.22087:MSTRG.10044:MSTRG.5025	hinfp-1:hinfp-2:rest-1:zfp674:znf-1:znf91:znf333-1:znf652:zscan2-2:zscan2-6
31726	dd_Smes_g4_231	448260	448279	CTCF_MA0139.1	5.54179	-	dd_Smes_g4_231	447492	449493	9.1135	1	MSTRG.4288:MSTRG.4289:MSTRG.22163:MSTRG.16827:MSTRG.9571:MSTRG.624:MSTRG.11386:MSTRG.22087:MSTRG.10044:MSTRG.5025	hinfp-1:hinfp-2:rest-1:zfp674:znf-1:znf91:znf333-1:znf652:zscan2-2:zscan2-6
31729	dd_Smes_g4_231	448484	448503	CTCF_MA0139.1	6.26944	-	dd_Smes_g4_231	447492	449493	8.25756	1	MSTRG.4288:MSTRG.4289:MSTRG.22163:MSTRG.16827:MSTRG.9571:MSTRG.624:MSTRG.11386:MSTRG.22087:MSTRG.10044:MSTRG.5025	hinfp-1:hinfp-2:rest-1:zfp674:znf-1:znf91:znf333-1:znf652:zscan2-2:zscan2-6
31730	dd_Smes_g4_231	448570	448589	CTCF_MA0139.1	7.64818	-	dd_Smes_g4_231	447492	449493	7.6431	1	MSTRG.4288:MSTRG.4289:MSTRG.22163:MSTRG.16827:MSTRG.9571:MSTRG.624:MSTRG.11386:MSTRG.22087:MSTRG.10044:MSTRG.5025	hinfp-1:hinfp-2:rest-1:zfp674:znf-1:znf91:znf333-1:znf652:zscan2-2:zscan2-6
31732	dd_Smes_g4_231	448640	448659	CTCF_MA0139.1	3.99962	-	dd_Smes_g4_231	447492	449493	8.99279	1	MSTRG.4288:MSTRG.4289:MSTRG.22163:MSTRG.16827:MSTRG.9571:MSTRG.624:MSTRG.11386:MSTRG.22087:MSTRG.10044:MSTRG.5025	hinfp-1:hinfp-2:rest-1:zfp674:znf-1:znf91:znf333-1:znf652:zscan2-2:zscan2-6
31764	dd_Smes_g4_232	58889	58908	CTCF_MA0139.1	5.94227	-	dd_Smes_g4_232	57443	59918	10.6293	1	MSTRG.4288:MSTRG.4289:MSTRG.22163:MSTRG.16827:MSTRG.9571:MSTRG.624:MSTRG.11386:MSTRG.22087:MSTRG.10044:MSTRG.5025	hinfp-1:hinfp-2:rest-1:zfp674:znf-1:znf91:znf333-1:znf652:zscan2-2:zscan2-6
31765	dd_Smes_g4_232	58929	58948	CTCF_MA0139.1	3.71897	+	dd_Smes_g4_232	57443	59918	8.22991	1	MSTRG.4288:MSTRG.4289:MSTRG.22163:MSTRG.16827:MSTRG.9571:MSTRG.624:MSTRG.11386:MSTRG.22087:MSTRG.10044:MSTRG.5025	hinfp-1:hinfp-2:rest-1:zfp674:znf-1:znf91:znf333-1:znf652:zscan2-2:zscan2-6
31766	dd_Smes_g4_232	58977	58996	CTCF_MA0139.1	4.00634	-	dd_Smes_g4_232	57443	59918	9.82534	1	MSTRG.4288:MSTRG.4289:MSTRG.22163:MSTRG.16827:MSTRG.9571:MSTRG.624:MSTRG.11386:MSTRG.22087:MSTRG.10044:MSTRG.5025	hinfp-1:hinfp-2:rest-1:zfp674:znf-1:znf91:znf333-1:znf652:zscan2-2:zscan2-6
31767	dd_Smes_g4_232	59011	59030	CTCF_MA0139.1	4.07021	+	dd_Smes_g4_232	57443	59918	9.99895	1	MSTRG.4288:MSTRG.4289:MSTRG.22163:MSTRG.16827:MSTRG.9571:MSTRG.624:MSTRG.11386:MSTRG.22087:MSTRG.10044:MSTRG.5025	hinfp-1:hinfp-2:rest-1:zfp674:znf-1:znf91:znf333-1:znf652:zscan2-2:zscan2-6
31769	dd_Smes_g4_232	76658	76677	CTCF_MA0139.1	5.33607	-	dd_Smes_g4_232	75777	77778	7.48751	1	MSTRG.4288:MSTRG.4289:MSTRG.22163:MSTRG.16827:MSTRG.9571:MSTRG.624:MSTRG.11386:MSTRG.22087:MSTRG.10044:MSTRG.5025	hinfp-1:hinfp-2:rest-1:zfp674:znf-1:znf91:znf333-1:znf652:zscan2-2:zscan2-6
31777	dd_Smes_g4_232	80701	80720	CTCF_MA0139.1	4.27886	+	dd_Smes_g4_232	79545	81851	7.37698	1	MSTRG.4288:MSTRG.4289:MSTRG.22163:MSTRG.16827:MSTRG.9571:MSTRG.624:MSTRG.11386:MSTRG.22087:MSTRG.10044:MSTRG.5025	hinfp-1:hinfp-2:rest-1:zfp674:znf-1:znf91:znf333-1:znf652:zscan2-2:zscan2-6
31779	dd_Smes_g4_232	349750	349769	CTCF_MA0139.1	9.53613	+	dd_Smes_g4_232	348897	352802	7.69257	1	MSTRG.4288:MSTRG.4289:MSTRG.22163:MSTRG.16827:MSTRG.9571:MSTRG.624:MSTRG.11386:MSTRG.22087:MSTRG.10044:MSTRG.5025	hinfp-1:hinfp-2:rest-1:zfp674:znf-1:znf91:znf333-1:znf652:zscan2-2:zscan2-6
31780	dd_Smes_g4_232	349890	349909	CTCF_MA0139.1	5.0752	+	dd_Smes_g4_232	348897	352802	8.78052	1	MSTRG.4288:MSTRG.4289:MSTRG.22163:MSTRG.16827:MSTRG.9571:MSTRG.624:MSTRG.11386:MSTRG.22087:MSTRG.10044:MSTRG.5025	hinfp-1:hinfp-2:rest-1:zfp674:znf-1:znf91:znf333-1:znf652:zscan2-2:zscan2-6
31781	dd_Smes_g4_232	350137	350156	CTCF_MA0139.1	5.87733	-	dd_Smes_g4_232	348897	352802	9.01881	1	MSTRG.4288:MSTRG.4289:MSTRG.22163:MSTRG.16827:MSTRG.9571:MSTRG.624:MSTRG.11386:MSTRG.22087:MSTRG.10044:MSTRG.5025	hinfp-1:hinfp-2:rest-1:zfp674:znf-1:znf91:znf333-1:znf652:zscan2-2:zscan2-6
31782	dd_Smes_g4_232	350791	350810	CTCF_MA0139.1	7.34556	-	dd_Smes_g4_232	348897	352802	7.74141	1	MSTRG.4288:MSTRG.4289:MSTRG.22163:MSTRG.16827:MSTRG.9571:MSTRG.624:MSTRG.11386:MSTRG.22087:MSTRG.10044:MSTRG.5025	hinfp-1:hinfp-2:rest-1:zfp674:znf-1:znf91:znf333-1:znf652:zscan2-2:zscan2-6
31787	dd_Smes_g4_232	351951	351970	CTCF_MA0139.1	6.01272	+	dd_Smes_g4_232	348897	352802	8.22742	1	MSTRG.4288:MSTRG.4289:MSTRG.22163:MSTRG.16827:MSTRG.9571:MSTRG.624:MSTRG.11386:MSTRG.22087:MSTRG.10044:MSTRG.5025	hinfp-1:hinfp-2:rest-1:zfp674:znf-1:znf91:znf333-1:znf652:zscan2-2:zscan2-6
31793	dd_Smes_g4_232	410419	410438	CTCF_MA0139.1	3.76047	+	dd_Smes_g4_232	408917	411088	8.10488	1	MSTRG.4288:MSTRG.4289:MSTRG.22163:MSTRG.16827:MSTRG.9571:MSTRG.624:MSTRG.11386:MSTRG.22087:MSTRG.10044:MSTRG.5025	hinfp-1:hinfp-2:rest-1:zfp674:znf-1:znf91:znf333-1:znf652:zscan2-2:zscan2-6
31795	dd_Smes_g4_232	420399	420418	CTCF_MA0139.1	6.84681	+	dd_Smes_g4_232	419474	421475	9.50039	1	MSTRG.4288:MSTRG.4289:MSTRG.22163:MSTRG.16827:MSTRG.9571:MSTRG.624:MSTRG.11386:MSTRG.22087:MSTRG.10044:MSTRG.5025	hinfp-1:hinfp-2:rest-1:zfp674:znf-1:znf91:znf333-1:znf652:zscan2-2:zscan2-6
31796	dd_Smes_g4_232	420541	420560	CTCF_MA0139.1	5.57086	-	dd_Smes_g4_232	419474	421475	9.47342	1	MSTRG.4288:MSTRG.4289:MSTRG.22163:MSTRG.16827:MSTRG.9571:MSTRG.624:MSTRG.11386:MSTRG.22087:MSTRG.10044:MSTRG.5025	hinfp-1:hinfp-2:rest-1:zfp674:znf-1:znf91:znf333-1:znf652:zscan2-2:zscan2-6
31807	dd_Smes_g4_232	500377	500396	CTCF_MA0139.1	7.13559	+	dd_Smes_g4_232	499361	503489	7.75894	1	MSTRG.4288:MSTRG.4289:MSTRG.22163:MSTRG.16827:MSTRG.9571:MSTRG.624:MSTRG.11386:MSTRG.22087:MSTRG.10044:MSTRG.5025	hinfp-1:hinfp-2:rest-1:zfp674:znf-1:znf91:znf333-1:znf652:zscan2-2:zscan2-6
31818	dd_Smes_g4_232	595595	595614	CTCF_MA0139.1	4.75865	-	dd_Smes_g4_232	594545	596546	7.66299	1	MSTRG.4288:MSTRG.4289:MSTRG.22163:MSTRG.16827:MSTRG.9571:MSTRG.624:MSTRG.11386:MSTRG.22087:MSTRG.10044:MSTRG.5025	hinfp-1:hinfp-2:rest-1:zfp674:znf-1:znf91:znf333-1:znf652:zscan2-2:zscan2-6
31819	dd_Smes_g4_232	595658	595677	CTCF_MA0139.1	4.08251	-	dd_Smes_g4_232	594545	596546	9.19263	1	MSTRG.4288:MSTRG.4289:MSTRG.22163:MSTRG.16827:MSTRG.9571:MSTRG.624:MSTRG.11386:MSTRG.22087:MSTRG.10044:MSTRG.5025	hinfp-1:hinfp-2:rest-1:zfp674:znf-1:znf91:znf333-1:znf652:zscan2-2:zscan2-6
31829	dd_Smes_g4_238	225908	225927	CTCF_MA0139.1	4.65497	-	dd_Smes_g4_238	225351	227352	7.93159	1	MSTRG.4288:MSTRG.4289:MSTRG.22163:MSTRG.16827:MSTRG.9571:MSTRG.624:MSTRG.11386:MSTRG.22087:MSTRG.10044:MSTRG.5025	hinfp-1:hinfp-2:rest-1:zfp674:znf-1:znf91:znf333-1:znf652:zscan2-2:zscan2-6
31843	dd_Smes_g4_24	673959	673978	CTCF_MA0139.1	4.5201	-	dd_Smes_g4_24	672473	676048	8.40987	1	MSTRG.4288:MSTRG.4289:MSTRG.22163:MSTRG.16827:MSTRG.9571:MSTRG.624:MSTRG.11386:MSTRG.22087:MSTRG.10044:MSTRG.5025	hinfp-1:hinfp-2:rest-1:zfp674:znf-1:znf91:znf333-1:znf652:zscan2-2:zscan2-6
31850	dd_Smes_g4_24	1031261	1031280	CTCF_MA0139.1	3.94446	-	dd_Smes_g4_24	1030434	1032435	8.24454	1	MSTRG.4288:MSTRG.4289:MSTRG.22163:MSTRG.16827:MSTRG.9571:MSTRG.624:MSTRG.11386:MSTRG.22087:MSTRG.10044:MSTRG.5025	hinfp-1:hinfp-2:rest-1:zfp674:znf-1:znf91:znf333-1:znf652:zscan2-2:zscan2-6
31858	dd_Smes_g4_24	2229405	2229424	CTCF_MA0139.1	11.1829	-	dd_Smes_g4_24	2228822	2230823	8.25908	1	MSTRG.4288:MSTRG.4289:MSTRG.22163:MSTRG.16827:MSTRG.9571:MSTRG.624:MSTRG.11386:MSTRG.22087:MSTRG.10044:MSTRG.5025	hinfp-1:hinfp-2:rest-1:zfp674:znf-1:znf91:znf333-1:znf652:zscan2-2:zscan2-6
31861	dd_Smes_g4_24	2356658	2356677	CTCF_MA0139.1	5.89414	-	dd_Smes_g4_24	2355479	2357480	8.42455	1	MSTRG.4288:MSTRG.4289:MSTRG.22163:MSTRG.16827:MSTRG.9571:MSTRG.624:MSTRG.11386:MSTRG.22087:MSTRG.10044:MSTRG.5025	hinfp-1:hinfp-2:rest-1:zfp674:znf-1:znf91:znf333-1:znf652:zscan2-2:zscan2-6
31863	dd_Smes_g4_24	3554205	3554224	CTCF_MA0139.1	4.38017	-	dd_Smes_g4_24	3552980	3554981	8.66497	1	MSTRG.4288:MSTRG.4289:MSTRG.22163:MSTRG.16827:MSTRG.9571:MSTRG.624:MSTRG.11386:MSTRG.22087:MSTRG.10044:MSTRG.5025	hinfp-1:hinfp-2:rest-1:zfp674:znf-1:znf91:znf333-1:znf652:zscan2-2:zscan2-6
31947	dd_Smes_g4_256	106835	106854	CTCF_MA0139.1	4.32026	-	dd_Smes_g4_256	106830	108831	7.48584	1	MSTRG.4288:MSTRG.4289:MSTRG.22163:MSTRG.16827:MSTRG.9571:MSTRG.624:MSTRG.11386:MSTRG.22087:MSTRG.10044:MSTRG.5025	hinfp-1:hinfp-2:rest-1:zfp674:znf-1:znf91:znf333-1:znf652:zscan2-2:zscan2-6
31956	dd_Smes_g4_257	478453	478472	CTCF_MA0139.1	3.9022	+	dd_Smes_g4_257	477350	479351	7.79245	1	MSTRG.4288:MSTRG.4289:MSTRG.22163:MSTRG.16827:MSTRG.9571:MSTRG.624:MSTRG.11386:MSTRG.22087:MSTRG.10044:MSTRG.5025	hinfp-1:hinfp-2:rest-1:zfp674:znf-1:znf91:znf333-1:znf652:zscan2-2:zscan2-6
31992	dd_Smes_g4_262	91903	91922	CTCF_MA0139.1	10.6179	-	dd_Smes_g4_262	91373	93374	7.793	1	MSTRG.4288:MSTRG.4289:MSTRG.22163:MSTRG.16827:MSTRG.9571:MSTRG.624:MSTRG.11386:MSTRG.22087:MSTRG.10044:MSTRG.5025	hinfp-1:hinfp-2:rest-1:zfp674:znf-1:znf91:znf333-1:znf652:zscan2-2:zscan2-6
32000	dd_Smes_g4_265	38550	38569	CTCF_MA0139.1	9.18017	-	dd_Smes_g4_265	36093	43765	8.6423	1	MSTRG.4288:MSTRG.4289:MSTRG.22163:MSTRG.16827:MSTRG.9571:MSTRG.624:MSTRG.11386:MSTRG.22087:MSTRG.10044:MSTRG.5025	hinfp-1:hinfp-2:rest-1:zfp674:znf-1:znf91:znf333-1:znf652:zscan2-2:zscan2-6
32005	dd_Smes_g4_265	51118	51137	CTCF_MA0139.1	10.8976	+	dd_Smes_g4_265	49999	53312	7.53162	1	MSTRG.4288:MSTRG.4289:MSTRG.22163:MSTRG.16827:MSTRG.9571:MSTRG.624:MSTRG.11386:MSTRG.22087:MSTRG.10044:MSTRG.5025	hinfp-1:hinfp-2:rest-1:zfp674:znf-1:znf91:znf333-1:znf652:zscan2-2:zscan2-6
32007	dd_Smes_g4_265	52127	52146	CTCF_MA0139.1	4.42088	-	dd_Smes_g4_265	49999	53312	7.64804	1	MSTRG.4288:MSTRG.4289:MSTRG.22163:MSTRG.16827:MSTRG.9571:MSTRG.624:MSTRG.11386:MSTRG.22087:MSTRG.10044:MSTRG.5025	hinfp-1:hinfp-2:rest-1:zfp674:znf-1:znf91:znf333-1:znf652:zscan2-2:zscan2-6
32008	dd_Smes_g4_265	52147	52166	CTCF_MA0139.1	5.25056	+	dd_Smes_g4_265	49999	53312	7.64804	1	MSTRG.4288:MSTRG.4289:MSTRG.22163:MSTRG.16827:MSTRG.9571:MSTRG.624:MSTRG.11386:MSTRG.22087:MSTRG.10044:MSTRG.5025	hinfp-1:hinfp-2:rest-1:zfp674:znf-1:znf91:znf333-1:znf652:zscan2-2:zscan2-6
32012	dd_Smes_g4_265	52491	52510	CTCF_MA0139.1	11.7796	+	dd_Smes_g4_265	49999	53312	8.21383	1	MSTRG.4288:MSTRG.4289:MSTRG.22163:MSTRG.16827:MSTRG.9571:MSTRG.624:MSTRG.11386:MSTRG.22087:MSTRG.10044:MSTRG.5025	hinfp-1:hinfp-2:rest-1:zfp674:znf-1:znf91:znf333-1:znf652:zscan2-2:zscan2-6
32013	dd_Smes_g4_265	52514	52533	CTCF_MA0139.1	4.01904	+	dd_Smes_g4_265	49999	53312	10.5093	1	MSTRG.4288:MSTRG.4289:MSTRG.22163:MSTRG.16827:MSTRG.9571:MSTRG.624:MSTRG.11386:MSTRG.22087:MSTRG.10044:MSTRG.5025	hinfp-1:hinfp-2:rest-1:zfp674:znf-1:znf91:znf333-1:znf652:zscan2-2:zscan2-6
32014	dd_Smes_g4_265	52565	52584	CTCF_MA0139.1	5.24781	-	dd_Smes_g4_265	49999	53312	8.52879	1	MSTRG.4288:MSTRG.4289:MSTRG.22163:MSTRG.16827:MSTRG.9571:MSTRG.624:MSTRG.11386:MSTRG.22087:MSTRG.10044:MSTRG.5025	hinfp-1:hinfp-2:rest-1:zfp674:znf-1:znf91:znf333-1:znf652:zscan2-2:zscan2-6
32015	dd_Smes_g4_265	58012	58031	CTCF_MA0139.1	9.20858	+	dd_Smes_g4_265	57533	59534	7.45766	1	MSTRG.4288:MSTRG.4289:MSTRG.22163:MSTRG.16827:MSTRG.9571:MSTRG.624:MSTRG.11386:MSTRG.22087:MSTRG.10044:MSTRG.5025	hinfp-1:hinfp-2:rest-1:zfp674:znf-1:znf91:znf333-1:znf652:zscan2-2:zscan2-6
32016	dd_Smes_g4_265	58081	58100	CTCF_MA0139.1	5.96709	-	dd_Smes_g4_265	57533	59534	7.8605	1	MSTRG.4288:MSTRG.4289:MSTRG.22163:MSTRG.16827:MSTRG.9571:MSTRG.624:MSTRG.11386:MSTRG.22087:MSTRG.10044:MSTRG.5025	hinfp-1:hinfp-2:rest-1:zfp674:znf-1:znf91:znf333-1:znf652:zscan2-2:zscan2-6
32039	dd_Smes_g4_265	238582	238601	CTCF_MA0139.1	5.30362	+	dd_Smes_g4_265	238492	240493	8.98779	1	MSTRG.4288:MSTRG.4289:MSTRG.22163:MSTRG.16827:MSTRG.9571:MSTRG.624:MSTRG.11386:MSTRG.22087:MSTRG.10044:MSTRG.5025	hinfp-1:hinfp-2:rest-1:zfp674:znf-1:znf91:znf333-1:znf652:zscan2-2:zscan2-6
32055	dd_Smes_g4_265	253635	253654	CTCF_MA0139.1	4.77582	+	dd_Smes_g4_265	251808	253809	8.21068	1	MSTRG.4288:MSTRG.4289:MSTRG.22163:MSTRG.16827:MSTRG.9571:MSTRG.624:MSTRG.11386:MSTRG.22087:MSTRG.10044:MSTRG.5025	hinfp-1:hinfp-2:rest-1:zfp674:znf-1:znf91:znf333-1:znf652:zscan2-2:zscan2-6
32062	dd_Smes_g4_265	282712	282731	CTCF_MA0139.1	4.41685	-	dd_Smes_g4_265	282457	285094	7.67931	1	MSTRG.4288:MSTRG.4289:MSTRG.22163:MSTRG.16827:MSTRG.9571:MSTRG.624:MSTRG.11386:MSTRG.22087:MSTRG.10044:MSTRG.5025	hinfp-1:hinfp-2:rest-1:zfp674:znf-1:znf91:znf333-1:znf652:zscan2-2:zscan2-6
32063	dd_Smes_g4_265	282895	282914	CTCF_MA0139.1	4.64213	+	dd_Smes_g4_265	282457	285094	10.5038	1	MSTRG.4288:MSTRG.4289:MSTRG.22163:MSTRG.16827:MSTRG.9571:MSTRG.624:MSTRG.11386:MSTRG.22087:MSTRG.10044:MSTRG.5025	hinfp-1:hinfp-2:rest-1:zfp674:znf-1:znf91:znf333-1:znf652:zscan2-2:zscan2-6
32064	dd_Smes_g4_265	283356	283375	CTCF_MA0139.1	3.89112	+	dd_Smes_g4_265	282457	285094	10.713	1	MSTRG.4288:MSTRG.4289:MSTRG.22163:MSTRG.16827:MSTRG.9571:MSTRG.624:MSTRG.11386:MSTRG.22087:MSTRG.10044:MSTRG.5025	hinfp-1:hinfp-2:rest-1:zfp674:znf-1:znf91:znf333-1:znf652:zscan2-2:zscan2-6
32071	dd_Smes_g4_265	311988	312007	CTCF_MA0139.1	4.15637	+	dd_Smes_g4_265	311281	313334	8.72171	1	MSTRG.4288:MSTRG.4289:MSTRG.22163:MSTRG.16827:MSTRG.9571:MSTRG.624:MSTRG.11386:MSTRG.22087:MSTRG.10044:MSTRG.5025	hinfp-1:hinfp-2:rest-1:zfp674:znf-1:znf91:znf333-1:znf652:zscan2-2:zscan2-6
32072	dd_Smes_g4_265	312190	312209	CTCF_MA0139.1	11.7165	+	dd_Smes_g4_265	311281	313334	9.30945	1	MSTRG.4288:MSTRG.4289:MSTRG.22163:MSTRG.16827:MSTRG.9571:MSTRG.624:MSTRG.11386:MSTRG.22087:MSTRG.10044:MSTRG.5025	hinfp-1:hinfp-2:rest-1:zfp674:znf-1:znf91:znf333-1:znf652:zscan2-2:zscan2-6
32073	dd_Smes_g4_265	312671	312690	CTCF_MA0139.1	5.74161	-	dd_Smes_g4_265	311281	313334	7.95526	1	MSTRG.4288:MSTRG.4289:MSTRG.22163:MSTRG.16827:MSTRG.9571:MSTRG.624:MSTRG.11386:MSTRG.22087:MSTRG.10044:MSTRG.5025	hinfp-1:hinfp-2:rest-1:zfp674:znf-1:znf91:znf333-1:znf652:zscan2-2:zscan2-6
32076	dd_Smes_g4_265	314910	314929	CTCF_MA0139.1	8.54876	+	dd_Smes_g4_265	314128	316129	7.76203	1	MSTRG.4288:MSTRG.4289:MSTRG.22163:MSTRG.16827:MSTRG.9571:MSTRG.624:MSTRG.11386:MSTRG.22087:MSTRG.10044:MSTRG.5025	hinfp-1:hinfp-2:rest-1:zfp674:znf-1:znf91:znf333-1:znf652:zscan2-2:zscan2-6
32077	dd_Smes_g4_265	315047	315066	CTCF_MA0139.1	6.9931	-	dd_Smes_g4_265	314128	316129	9.44996	1	MSTRG.4288:MSTRG.4289:MSTRG.22163:MSTRG.16827:MSTRG.9571:MSTRG.624:MSTRG.11386:MSTRG.22087:MSTRG.10044:MSTRG.5025	hinfp-1:hinfp-2:rest-1:zfp674:znf-1:znf91:znf333-1:znf652:zscan2-2:zscan2-6
32080	dd_Smes_g4_265	337206	337225	CTCF_MA0139.1	9.46278	-	dd_Smes_g4_265	335942	337943	7.91327	1	MSTRG.4288:MSTRG.4289:MSTRG.22163:MSTRG.16827:MSTRG.9571:MSTRG.624:MSTRG.11386:MSTRG.22087:MSTRG.10044:MSTRG.5025	hinfp-1:hinfp-2:rest-1:zfp674:znf-1:znf91:znf333-1:znf652:zscan2-2:zscan2-6
32095	dd_Smes_g4_265	421056	421075	CTCF_MA0139.1	4.07815	+	dd_Smes_g4_265	417866	422224	7.87775	1	MSTRG.4288:MSTRG.4289:MSTRG.22163:MSTRG.16827:MSTRG.9571:MSTRG.624:MSTRG.11386:MSTRG.22087:MSTRG.10044:MSTRG.5025	hinfp-1:hinfp-2:rest-1:zfp674:znf-1:znf91:znf333-1:znf652:zscan2-2:zscan2-6
32098	dd_Smes_g4_265	425794	425813	CTCF_MA0139.1	3.75422	+	dd_Smes_g4_265	423795	428200	8.63456	1	MSTRG.4288:MSTRG.4289:MSTRG.22163:MSTRG.16827:MSTRG.9571:MSTRG.624:MSTRG.11386:MSTRG.22087:MSTRG.10044:MSTRG.5025	hinfp-1:hinfp-2:rest-1:zfp674:znf-1:znf91:znf333-1:znf652:zscan2-2:zscan2-6
32107	dd_Smes_g4_265	496757	496776	CTCF_MA0139.1	4.88175	+	dd_Smes_g4_265	494677	498996	7.97255	1	MSTRG.4288:MSTRG.4289:MSTRG.22163:MSTRG.16827:MSTRG.9571:MSTRG.624:MSTRG.11386:MSTRG.22087:MSTRG.10044:MSTRG.5025	hinfp-1:hinfp-2:rest-1:zfp674:znf-1:znf91:znf333-1:znf652:zscan2-2:zscan2-6
32109	dd_Smes_g4_265	497188	497207	CTCF_MA0139.1	4.86316	+	dd_Smes_g4_265	494677	498996	7.38664	1	MSTRG.4288:MSTRG.4289:MSTRG.22163:MSTRG.16827:MSTRG.9571:MSTRG.624:MSTRG.11386:MSTRG.22087:MSTRG.10044:MSTRG.5025	hinfp-1:hinfp-2:rest-1:zfp674:znf-1:znf91:znf333-1:znf652:zscan2-2:zscan2-6
32130	dd_Smes_g4_265	555563	555582	CTCF_MA0139.1	6.51399	+	dd_Smes_g4_265	552381	556144	8.80771	1	MSTRG.4288:MSTRG.4289:MSTRG.22163:MSTRG.16827:MSTRG.9571:MSTRG.624:MSTRG.11386:MSTRG.22087:MSTRG.10044:MSTRG.5025	hinfp-1:hinfp-2:rest-1:zfp674:znf-1:znf91:znf333-1:znf652:zscan2-2:zscan2-6
32140	dd_Smes_g4_267	504119	504138	CTCF_MA0139.1	4.41378	+	dd_Smes_g4_267	504070	506197	8.81237	1	MSTRG.4288:MSTRG.4289:MSTRG.22163:MSTRG.16827:MSTRG.9571:MSTRG.624:MSTRG.11386:MSTRG.22087:MSTRG.10044:MSTRG.5025	hinfp-1:hinfp-2:rest-1:zfp674:znf-1:znf91:znf333-1:znf652:zscan2-2:zscan2-6
32210	dd_Smes_g4_286	127722	127741	CTCF_MA0139.1	8.49959	-	dd_Smes_g4_286	127580	129803	7.55704	1	MSTRG.4288:MSTRG.4289:MSTRG.22163:MSTRG.16827:MSTRG.9571:MSTRG.624:MSTRG.11386:MSTRG.22087:MSTRG.10044:MSTRG.5025	hinfp-1:hinfp-2:rest-1:zfp674:znf-1:znf91:znf333-1:znf652:zscan2-2:zscan2-6
32225	dd_Smes_g4_29	1147870	1147889	CTCF_MA0139.1	3.87436	-	dd_Smes_g4_29	1147773	1149774	10.7816	1	MSTRG.4288:MSTRG.4289:MSTRG.22163:MSTRG.16827:MSTRG.9571:MSTRG.624:MSTRG.11386:MSTRG.22087:MSTRG.10044:MSTRG.5025	hinfp-1:hinfp-2:rest-1:zfp674:znf-1:znf91:znf333-1:znf652:zscan2-2:zscan2-6
32257	dd_Smes_g4_290	143538	143557	CTCF_MA0139.1	7.58822	+	dd_Smes_g4_290	143432	145433	7.78642	1	MSTRG.4288:MSTRG.4289:MSTRG.22163:MSTRG.16827:MSTRG.9571:MSTRG.624:MSTRG.11386:MSTRG.22087:MSTRG.10044:MSTRG.5025	hinfp-1:hinfp-2:rest-1:zfp674:znf-1:znf91:znf333-1:znf652:zscan2-2:zscan2-6
32259	dd_Smes_g4_290	144395	144414	CTCF_MA0139.1	4.23484	-	dd_Smes_g4_290	143432	145433	10.0777	1	MSTRG.4288:MSTRG.4289:MSTRG.22163:MSTRG.16827:MSTRG.9571:MSTRG.624:MSTRG.11386:MSTRG.22087:MSTRG.10044:MSTRG.5025	hinfp-1:hinfp-2:rest-1:zfp674:znf-1:znf91:znf333-1:znf652:zscan2-2:zscan2-6
32265	dd_Smes_g4_290	304598	304617	CTCF_MA0139.1	3.70982	+	dd_Smes_g4_290	303900	305901	7.40008	1	MSTRG.4288:MSTRG.4289:MSTRG.22163:MSTRG.16827:MSTRG.9571:MSTRG.624:MSTRG.11386:MSTRG.22087:MSTRG.10044:MSTRG.5025	hinfp-1:hinfp-2:rest-1:zfp674:znf-1:znf91:znf333-1:znf652:zscan2-2:zscan2-6
32266	dd_Smes_g4_290	305489	305508	CTCF_MA0139.1	10.823	+	dd_Smes_g4_290	303900	305901	10.5593	1	MSTRG.4288:MSTRG.4289:MSTRG.22163:MSTRG.16827:MSTRG.9571:MSTRG.624:MSTRG.11386:MSTRG.22087:MSTRG.10044:MSTRG.5025	hinfp-1:hinfp-2:rest-1:zfp674:znf-1:znf91:znf333-1:znf652:zscan2-2:zscan2-6
32268	dd_Smes_g4_297	76569	76588	CTCF_MA0139.1	6.90023	-	dd_Smes_g4_297	75458	77459	7.78848	1	MSTRG.4288:MSTRG.4289:MSTRG.22163:MSTRG.16827:MSTRG.9571:MSTRG.624:MSTRG.11386:MSTRG.22087:MSTRG.10044:MSTRG.5025	hinfp-1:hinfp-2:rest-1:zfp674:znf-1:znf91:znf333-1:znf652:zscan2-2:zscan2-6
32273	dd_Smes_g4_297	109860	109879	CTCF_MA0139.1	4.47984	-	dd_Smes_g4_297	108282	110401	8.51932	1	MSTRG.4288:MSTRG.4289:MSTRG.22163:MSTRG.16827:MSTRG.9571:MSTRG.624:MSTRG.11386:MSTRG.22087:MSTRG.10044:MSTRG.5025	hinfp-1:hinfp-2:rest-1:zfp674:znf-1:znf91:znf333-1:znf652:zscan2-2:zscan2-6
32281	dd_Smes_g4_297	127585	127604	CTCF_MA0139.1	5.1999	-	dd_Smes_g4_297	126643	134885	7.42521	1	MSTRG.4288:MSTRG.4289:MSTRG.22163:MSTRG.16827:MSTRG.9571:MSTRG.624:MSTRG.11386:MSTRG.22087:MSTRG.10044:MSTRG.5025	hinfp-1:hinfp-2:rest-1:zfp674:znf-1:znf91:znf333-1:znf652:zscan2-2:zscan2-6
32282	dd_Smes_g4_297	127682	127701	CTCF_MA0139.1	9.62187	+	dd_Smes_g4_297	126643	134885	7.84396	1	MSTRG.4288:MSTRG.4289:MSTRG.22163:MSTRG.16827:MSTRG.9571:MSTRG.624:MSTRG.11386:MSTRG.22087:MSTRG.10044:MSTRG.5025	hinfp-1:hinfp-2:rest-1:zfp674:znf-1:znf91:znf333-1:znf652:zscan2-2:zscan2-6
32283	dd_Smes_g4_297	127709	127728	CTCF_MA0139.1	4.98675	+	dd_Smes_g4_297	126643	134885	7.75018	1	MSTRG.4288:MSTRG.4289:MSTRG.22163:MSTRG.16827:MSTRG.9571:MSTRG.624:MSTRG.11386:MSTRG.22087:MSTRG.10044:MSTRG.5025	hinfp-1:hinfp-2:rest-1:zfp674:znf-1:znf91:znf333-1:znf652:zscan2-2:zscan2-6
32289	dd_Smes_g4_297	128272	128291	CTCF_MA0139.1	4.25641	-	dd_Smes_g4_297	126643	134885	7.50105	1	MSTRG.4288:MSTRG.4289:MSTRG.22163:MSTRG.16827:MSTRG.9571:MSTRG.624:MSTRG.11386:MSTRG.22087:MSTRG.10044:MSTRG.5025	hinfp-1:hinfp-2:rest-1:zfp674:znf-1:znf91:znf333-1:znf652:zscan2-2:zscan2-6
32291	dd_Smes_g4_297	128496	128515	CTCF_MA0139.1	6.1745	-	dd_Smes_g4_297	126643	134885	8.07947	1	MSTRG.4288:MSTRG.4289:MSTRG.22163:MSTRG.16827:MSTRG.9571:MSTRG.624:MSTRG.11386:MSTRG.22087:MSTRG.10044:MSTRG.5025	hinfp-1:hinfp-2:rest-1:zfp674:znf-1:znf91:znf333-1:znf652:zscan2-2:zscan2-6
32295	dd_Smes_g4_297	129267	129286	CTCF_MA0139.1	4.64823	-	dd_Smes_g4_297	126643	134885	12.0548	1	MSTRG.4288:MSTRG.4289:MSTRG.22163:MSTRG.16827:MSTRG.9571:MSTRG.624:MSTRG.11386:MSTRG.22087:MSTRG.10044:MSTRG.5025	hinfp-1:hinfp-2:rest-1:zfp674:znf-1:znf91:znf333-1:znf652:zscan2-2:zscan2-6
32296	dd_Smes_g4_297	129286	129305	CTCF_MA0139.1	5.80557	-	dd_Smes_g4_297	126643	134885	11.8842	1	MSTRG.4288:MSTRG.4289:MSTRG.22163:MSTRG.16827:MSTRG.9571:MSTRG.624:MSTRG.11386:MSTRG.22087:MSTRG.10044:MSTRG.5025	hinfp-1:hinfp-2:rest-1:zfp674:znf-1:znf91:znf333-1:znf652:zscan2-2:zscan2-6
32301	dd_Smes_g4_297	133265	133284	CTCF_MA0139.1	3.69864	+	dd_Smes_g4_297	126643	134885	9.4626	1	MSTRG.4288:MSTRG.4289:MSTRG.22163:MSTRG.16827:MSTRG.9571:MSTRG.624:MSTRG.11386:MSTRG.22087:MSTRG.10044:MSTRG.5025	hinfp-1:hinfp-2:rest-1:zfp674:znf-1:znf91:znf333-1:znf652:zscan2-2:zscan2-6
32302	dd_Smes_g4_297	133285	133304	CTCF_MA0139.1	5.95477	+	dd_Smes_g4_297	126643	134885	10.522	1	MSTRG.4288:MSTRG.4289:MSTRG.22163:MSTRG.16827:MSTRG.9571:MSTRG.624:MSTRG.11386:MSTRG.22087:MSTRG.10044:MSTRG.5025	hinfp-1:hinfp-2:rest-1:zfp674:znf-1:znf91:znf333-1:znf652:zscan2-2:zscan2-6
32303	dd_Smes_g4_297	133339	133358	CTCF_MA0139.1	6.08172	-	dd_Smes_g4_297	126643	134885	8.04953	1	MSTRG.4288:MSTRG.4289:MSTRG.22163:MSTRG.16827:MSTRG.9571:MSTRG.624:MSTRG.11386:MSTRG.22087:MSTRG.10044:MSTRG.5025	hinfp-1:hinfp-2:rest-1:zfp674:znf-1:znf91:znf333-1:znf652:zscan2-2:zscan2-6
32316	dd_Smes_g4_298	95852	95871	CTCF_MA0139.1	4.60997	-	dd_Smes_g4_298	94854	96855	7.80974	1	MSTRG.4288:MSTRG.4289:MSTRG.22163:MSTRG.16827:MSTRG.9571:MSTRG.624:MSTRG.11386:MSTRG.22087:MSTRG.10044:MSTRG.5025	hinfp-1:hinfp-2:rest-1:zfp674:znf-1:znf91:znf333-1:znf652:zscan2-2:zscan2-6
32326	dd_Smes_g4_298	125845	125864	CTCF_MA0139.1	5.85388	-	dd_Smes_g4_298	124604	126605	7.59636	1	MSTRG.4288:MSTRG.4289:MSTRG.22163:MSTRG.16827:MSTRG.9571:MSTRG.624:MSTRG.11386:MSTRG.22087:MSTRG.10044:MSTRG.5025	hinfp-1:hinfp-2:rest-1:zfp674:znf-1:znf91:znf333-1:znf652:zscan2-2:zscan2-6
32328	dd_Smes_g4_3	25443	25462	CTCF_MA0139.1	7.80009	-	dd_Smes_g4_3	24655	26656	9.10765	1	MSTRG.4288:MSTRG.4289:MSTRG.22163:MSTRG.16827:MSTRG.9571:MSTRG.624:MSTRG.11386:MSTRG.22087:MSTRG.10044:MSTRG.5025	hinfp-1:hinfp-2:rest-1:zfp674:znf-1:znf91:znf333-1:znf652:zscan2-2:zscan2-6
32329	dd_Smes_g4_3	25712	25731	CTCF_MA0139.1	13.0917	-	dd_Smes_g4_3	24655	26656	12.7711	1	MSTRG.4288:MSTRG.4289:MSTRG.22163:MSTRG.16827:MSTRG.9571:MSTRG.624:MSTRG.11386:MSTRG.22087:MSTRG.10044:MSTRG.5025	hinfp-1:hinfp-2:rest-1:zfp674:znf-1:znf91:znf333-1:znf652:zscan2-2:zscan2-6
32344	dd_Smes_g4_3	2503473	2503492	CTCF_MA0139.1	4.15445	-	dd_Smes_g4_3	2502571	2504572	7.41692	1	MSTRG.4288:MSTRG.4289:MSTRG.22163:MSTRG.16827:MSTRG.9571:MSTRG.624:MSTRG.11386:MSTRG.22087:MSTRG.10044:MSTRG.5025	hinfp-1:hinfp-2:rest-1:zfp674:znf-1:znf91:znf333-1:znf652:zscan2-2:zscan2-6
32358	dd_Smes_g4_3	3514343	3514362	CTCF_MA0139.1	4.88452	-	dd_Smes_g4_3	3513170	3515703	8.07108	1	MSTRG.4288:MSTRG.4289:MSTRG.22163:MSTRG.16827:MSTRG.9571:MSTRG.624:MSTRG.11386:MSTRG.22087:MSTRG.10044:MSTRG.5025	hinfp-1:hinfp-2:rest-1:zfp674:znf-1:znf91:znf333-1:znf652:zscan2-2:zscan2-6
32402	dd_Smes_g4_30	1670279	1670298	CTCF_MA0139.1	3.76059	-	dd_Smes_g4_30	1669480	1671481	31.9964	1	MSTRG.4288:MSTRG.4289:MSTRG.22163:MSTRG.16827:MSTRG.9571:MSTRG.624:MSTRG.11386:MSTRG.22087:MSTRG.10044:MSTRG.5025	hinfp-1:hinfp-2:rest-1:zfp674:znf-1:znf91:znf333-1:znf652:zscan2-2:zscan2-6
32412	dd_Smes_g4_30	2155298	2155317	CTCF_MA0139.1	7.46989	-	dd_Smes_g4_30	2154241	2156242	7.50751	1	MSTRG.4288:MSTRG.4289:MSTRG.22163:MSTRG.16827:MSTRG.9571:MSTRG.624:MSTRG.11386:MSTRG.22087:MSTRG.10044:MSTRG.5025	hinfp-1:hinfp-2:rest-1:zfp674:znf-1:znf91:znf333-1:znf652:zscan2-2:zscan2-6
32422	dd_Smes_g4_30	3862579	3862598	CTCF_MA0139.1	6.14864	-	dd_Smes_g4_30	3861540	3864241	8.72845	1	MSTRG.4288:MSTRG.4289:MSTRG.22163:MSTRG.16827:MSTRG.9571:MSTRG.624:MSTRG.11386:MSTRG.22087:MSTRG.10044:MSTRG.5025	hinfp-1:hinfp-2:rest-1:zfp674:znf-1:znf91:znf333-1:znf652:zscan2-2:zscan2-6
32457	dd_Smes_g4_31	2467231	2467250	CTCF_MA0139.1	3.74032	+	dd_Smes_g4_31	2465322	2467323	14.8796	1	MSTRG.4288:MSTRG.4289:MSTRG.22163:MSTRG.16827:MSTRG.9571:MSTRG.624:MSTRG.11386:MSTRG.22087:MSTRG.10044:MSTRG.5025	hinfp-1:hinfp-2:rest-1:zfp674:znf-1:znf91:znf333-1:znf652:zscan2-2:zscan2-6
32466	dd_Smes_g4_31	3228803	3228822	CTCF_MA0139.1	4.86929	-	dd_Smes_g4_31	3226172	3229889	7.44228	1	MSTRG.4288:MSTRG.4289:MSTRG.22163:MSTRG.16827:MSTRG.9571:MSTRG.624:MSTRG.11386:MSTRG.22087:MSTRG.10044:MSTRG.5025	hinfp-1:hinfp-2:rest-1:zfp674:znf-1:znf91:znf333-1:znf652:zscan2-2:zscan2-6
32475	dd_Smes_g4_31	4349656	4349675	CTCF_MA0139.1	11.2066	-	dd_Smes_g4_31	4348690	4350796	8.02972	1	MSTRG.4288:MSTRG.4289:MSTRG.22163:MSTRG.16827:MSTRG.9571:MSTRG.624:MSTRG.11386:MSTRG.22087:MSTRG.10044:MSTRG.5025	hinfp-1:hinfp-2:rest-1:zfp674:znf-1:znf91:znf333-1:znf652:zscan2-2:zscan2-6
32491	dd_Smes_g4_315	22340	22359	CTCF_MA0139.1	3.71258	-	dd_Smes_g4_315	21210	23211	37.2582	1	MSTRG.4288:MSTRG.4289:MSTRG.22163:MSTRG.16827:MSTRG.9571:MSTRG.624:MSTRG.11386:MSTRG.22087:MSTRG.10044:MSTRG.5025	hinfp-1:hinfp-2:rest-1:zfp674:znf-1:znf91:znf333-1:znf652:zscan2-2:zscan2-6
32526	dd_Smes_g4_32	3848575	3848594	CTCF_MA0139.1	7.83448	+	dd_Smes_g4_32	3847527	3849528	8.12371	1	MSTRG.4288:MSTRG.4289:MSTRG.22163:MSTRG.16827:MSTRG.9571:MSTRG.624:MSTRG.11386:MSTRG.22087:MSTRG.10044:MSTRG.5025	hinfp-1:hinfp-2:rest-1:zfp674:znf-1:znf91:znf333-1:znf652:zscan2-2:zscan2-6
32547	dd_Smes_g4_347	96133	96152	CTCF_MA0139.1	5.32036	-	dd_Smes_g4_347	94156	96157	8.7715	1	MSTRG.4288:MSTRG.4289:MSTRG.22163:MSTRG.16827:MSTRG.9571:MSTRG.624:MSTRG.11386:MSTRG.22087:MSTRG.10044:MSTRG.5025	hinfp-1:hinfp-2:rest-1:zfp674:znf-1:znf91:znf333-1:znf652:zscan2-2:zscan2-6
32576	dd_Smes_g4_354	8920	8939	CTCF_MA0139.1	5.53703	-	dd_Smes_g4_354	8039	10040	7.47191	1	MSTRG.4288:MSTRG.4289:MSTRG.22163:MSTRG.16827:MSTRG.9571:MSTRG.624:MSTRG.11386:MSTRG.22087:MSTRG.10044:MSTRG.5025	hinfp-1:hinfp-2:rest-1:zfp674:znf-1:znf91:znf333-1:znf652:zscan2-2:zscan2-6
32610	dd_Smes_g4_37	587038	587057	CTCF_MA0139.1	9.28121	+	dd_Smes_g4_37	585958	587959	9.05794	1	MSTRG.4288:MSTRG.4289:MSTRG.22163:MSTRG.16827:MSTRG.9571:MSTRG.624:MSTRG.11386:MSTRG.22087:MSTRG.10044:MSTRG.5025	hinfp-1:hinfp-2:rest-1:zfp674:znf-1:znf91:znf333-1:znf652:zscan2-2:zscan2-6
32612	dd_Smes_g4_37	587329	587348	CTCF_MA0139.1	4.52625	-	dd_Smes_g4_37	585958	587959	7.71165	1	MSTRG.4288:MSTRG.4289:MSTRG.22163:MSTRG.16827:MSTRG.9571:MSTRG.624:MSTRG.11386:MSTRG.22087:MSTRG.10044:MSTRG.5025	hinfp-1:hinfp-2:rest-1:zfp674:znf-1:znf91:znf333-1:znf652:zscan2-2:zscan2-6
32613	dd_Smes_g4_37	698893	698912	CTCF_MA0139.1	7.22849	+	dd_Smes_g4_37	697688	699689	8.47409	1	MSTRG.4288:MSTRG.4289:MSTRG.22163:MSTRG.16827:MSTRG.9571:MSTRG.624:MSTRG.11386:MSTRG.22087:MSTRG.10044:MSTRG.5025	hinfp-1:hinfp-2:rest-1:zfp674:znf-1:znf91:znf333-1:znf652:zscan2-2:zscan2-6
32653	dd_Smes_g4_37	2762064	2762083	CTCF_MA0139.1	5.77773	-	dd_Smes_g4_37	2759340	2763011	7.6925	1	MSTRG.4288:MSTRG.4289:MSTRG.22163:MSTRG.16827:MSTRG.9571:MSTRG.624:MSTRG.11386:MSTRG.22087:MSTRG.10044:MSTRG.5025	hinfp-1:hinfp-2:rest-1:zfp674:znf-1:znf91:znf333-1:znf652:zscan2-2:zscan2-6
32663	dd_Smes_g4_37	3013205	3013224	CTCF_MA0139.1	3.97878	+	dd_Smes_g4_37	3010441	3017220	7.64105	1	MSTRG.4288:MSTRG.4289:MSTRG.22163:MSTRG.16827:MSTRG.9571:MSTRG.624:MSTRG.11386:MSTRG.22087:MSTRG.10044:MSTRG.5025	hinfp-1:hinfp-2:rest-1:zfp674:znf-1:znf91:znf333-1:znf652:zscan2-2:zscan2-6
32673	dd_Smes_g4_37	3033727	3033746	CTCF_MA0139.1	5.11923	+	dd_Smes_g4_37	3030884	3034871	7.8865	1	MSTRG.4288:MSTRG.4289:MSTRG.22163:MSTRG.16827:MSTRG.9571:MSTRG.624:MSTRG.11386:MSTRG.22087:MSTRG.10044:MSTRG.5025	hinfp-1:hinfp-2:rest-1:zfp674:znf-1:znf91:znf333-1:znf652:zscan2-2:zscan2-6
32678	dd_Smes_g4_37	3163474	3163493	CTCF_MA0139.1	4.95748	+	dd_Smes_g4_37	3161935	3163936	8.86168	1	MSTRG.4288:MSTRG.4289:MSTRG.22163:MSTRG.16827:MSTRG.9571:MSTRG.624:MSTRG.11386:MSTRG.22087:MSTRG.10044:MSTRG.5025	hinfp-1:hinfp-2:rest-1:zfp674:znf-1:znf91:znf333-1:znf652:zscan2-2:zscan2-6
32687	dd_Smes_g4_37	3226313	3226332	CTCF_MA0139.1	6.82074	-	dd_Smes_g4_37	3223866	3227332	7.74019	1	MSTRG.4288:MSTRG.4289:MSTRG.22163:MSTRG.16827:MSTRG.9571:MSTRG.624:MSTRG.11386:MSTRG.22087:MSTRG.10044:MSTRG.5025	hinfp-1:hinfp-2:rest-1:zfp674:znf-1:znf91:znf333-1:znf652:zscan2-2:zscan2-6
32690	dd_Smes_g4_37	3602830	3602849	CTCF_MA0139.1	9.91343	+	dd_Smes_g4_37	3602214	3604481	8.21887	1	MSTRG.4288:MSTRG.4289:MSTRG.22163:MSTRG.16827:MSTRG.9571:MSTRG.624:MSTRG.11386:MSTRG.22087:MSTRG.10044:MSTRG.5025	hinfp-1:hinfp-2:rest-1:zfp674:znf-1:znf91:znf333-1:znf652:zscan2-2:zscan2-6
32692	dd_Smes_g4_37	3603056	3603075	CTCF_MA0139.1	3.71707	-	dd_Smes_g4_37	3602214	3604481	8.44404	1	MSTRG.4288:MSTRG.4289:MSTRG.22163:MSTRG.16827:MSTRG.9571:MSTRG.624:MSTRG.11386:MSTRG.22087:MSTRG.10044:MSTRG.5025	hinfp-1:hinfp-2:rest-1:zfp674:znf-1:znf91:znf333-1:znf652:zscan2-2:zscan2-6
32702	dd_Smes_g4_37	3626835	3626854	CTCF_MA0139.1	8.84257	-	dd_Smes_g4_37	3625286	3627287	8.43154	1	MSTRG.4288:MSTRG.4289:MSTRG.22163:MSTRG.16827:MSTRG.9571:MSTRG.624:MSTRG.11386:MSTRG.22087:MSTRG.10044:MSTRG.5025	hinfp-1:hinfp-2:rest-1:zfp674:znf-1:znf91:znf333-1:znf652:zscan2-2:zscan2-6
32703	dd_Smes_g4_37	3626901	3626920	CTCF_MA0139.1	7.5579	-	dd_Smes_g4_37	3625286	3627287	10.3895	1	MSTRG.4288:MSTRG.4289:MSTRG.22163:MSTRG.16827:MSTRG.9571:MSTRG.624:MSTRG.11386:MSTRG.22087:MSTRG.10044:MSTRG.5025	hinfp-1:hinfp-2:rest-1:zfp674:znf-1:znf91:znf333-1:znf652:zscan2-2:zscan2-6
32705	dd_Smes_g4_37	3627200	3627219	CTCF_MA0139.1	7.44838	-	dd_Smes_g4_37	3625286	3627287	10.8533	1	MSTRG.4288:MSTRG.4289:MSTRG.22163:MSTRG.16827:MSTRG.9571:MSTRG.624:MSTRG.11386:MSTRG.22087:MSTRG.10044:MSTRG.5025	hinfp-1:hinfp-2:rest-1:zfp674:znf-1:znf91:znf333-1:znf652:zscan2-2:zscan2-6
32719	dd_Smes_g4_37	4667536	4667555	CTCF_MA0139.1	6.65682	-	dd_Smes_g4_37	4666271	4668272	7.86077	1	MSTRG.4288:MSTRG.4289:MSTRG.22163:MSTRG.16827:MSTRG.9571:MSTRG.624:MSTRG.11386:MSTRG.22087:MSTRG.10044:MSTRG.5025	hinfp-1:hinfp-2:rest-1:zfp674:znf-1:znf91:znf333-1:znf652:zscan2-2:zscan2-6
32720	dd_Smes_g4_37	4767255	4767274	CTCF_MA0139.1	5.98905	+	dd_Smes_g4_37	4766656	4768657	8.01791	1	MSTRG.4288:MSTRG.4289:MSTRG.22163:MSTRG.16827:MSTRG.9571:MSTRG.624:MSTRG.11386:MSTRG.22087:MSTRG.10044:MSTRG.5025	hinfp-1:hinfp-2:rest-1:zfp674:znf-1:znf91:znf333-1:znf652:zscan2-2:zscan2-6
32722	dd_Smes_g4_37	4767711	4767730	CTCF_MA0139.1	6.47598	-	dd_Smes_g4_37	4766656	4768657	10.5003	1	MSTRG.4288:MSTRG.4289:MSTRG.22163:MSTRG.16827:MSTRG.9571:MSTRG.624:MSTRG.11386:MSTRG.22087:MSTRG.10044:MSTRG.5025	hinfp-1:hinfp-2:rest-1:zfp674:znf-1:znf91:znf333-1:znf652:zscan2-2:zscan2-6
32723	dd_Smes_g4_38	357439	357458	CTCF_MA0139.1	8.81651	-	dd_Smes_g4_38	356700	358701	7.81018	1	MSTRG.4288:MSTRG.4289:MSTRG.22163:MSTRG.16827:MSTRG.9571:MSTRG.624:MSTRG.11386:MSTRG.22087:MSTRG.10044:MSTRG.5025	hinfp-1:hinfp-2:rest-1:zfp674:znf-1:znf91:znf333-1:znf652:zscan2-2:zscan2-6
32739	dd_Smes_g4_38	4513555	4513574	CTCF_MA0139.1	5.66598	+	dd_Smes_g4_38	4512448	4515216	8.04305	1	MSTRG.4288:MSTRG.4289:MSTRG.22163:MSTRG.16827:MSTRG.9571:MSTRG.624:MSTRG.11386:MSTRG.22087:MSTRG.10044:MSTRG.5025	hinfp-1:hinfp-2:rest-1:zfp674:znf-1:znf91:znf333-1:znf652:zscan2-2:zscan2-6
32740	dd_Smes_g4_38	4513670	4513689	CTCF_MA0139.1	6.01978	+	dd_Smes_g4_38	4512448	4515216	10.1731	1	MSTRG.4288:MSTRG.4289:MSTRG.22163:MSTRG.16827:MSTRG.9571:MSTRG.624:MSTRG.11386:MSTRG.22087:MSTRG.10044:MSTRG.5025	hinfp-1:hinfp-2:rest-1:zfp674:znf-1:znf91:znf333-1:znf652:zscan2-2:zscan2-6
32744	dd_Smes_g4_38	4616049	4616068	CTCF_MA0139.1	5.94404	-	dd_Smes_g4_38	4615843	4617974	7.71202	1	MSTRG.4288:MSTRG.4289:MSTRG.22163:MSTRG.16827:MSTRG.9571:MSTRG.624:MSTRG.11386:MSTRG.22087:MSTRG.10044:MSTRG.5025	hinfp-1:hinfp-2:rest-1:zfp674:znf-1:znf91:znf333-1:znf652:zscan2-2:zscan2-6
32797	dd_Smes_g4_4	4512696	4512715	CTCF_MA0139.1	4.48708	+	dd_Smes_g4_4	4511461	4514583	7.79427	1	MSTRG.4288:MSTRG.4289:MSTRG.22163:MSTRG.16827:MSTRG.9571:MSTRG.624:MSTRG.11386:MSTRG.22087:MSTRG.10044:MSTRG.5025	hinfp-1:hinfp-2:rest-1:zfp674:znf-1:znf91:znf333-1:znf652:zscan2-2:zscan2-6
32800	dd_Smes_g4_4	5464113	5464132	CTCF_MA0139.1	8.20781	-	dd_Smes_g4_4	5463455	5465456	9.16797	1	MSTRG.4288:MSTRG.4289:MSTRG.22163:MSTRG.16827:MSTRG.9571:MSTRG.624:MSTRG.11386:MSTRG.22087:MSTRG.10044:MSTRG.5025	hinfp-1:hinfp-2:rest-1:zfp674:znf-1:znf91:znf333-1:znf652:zscan2-2:zscan2-6
32801	dd_Smes_g4_4	5464144	5464163	CTCF_MA0139.1	9.63746	+	dd_Smes_g4_4	5463455	5465456	8.21235	1	MSTRG.4288:MSTRG.4289:MSTRG.22163:MSTRG.16827:MSTRG.9571:MSTRG.624:MSTRG.11386:MSTRG.22087:MSTRG.10044:MSTRG.5025	hinfp-1:hinfp-2:rest-1:zfp674:znf-1:znf91:znf333-1:znf652:zscan2-2:zscan2-6
32835	dd_Smes_g4_4	9686111	9686130	CTCF_MA0139.1	4.25967	-	dd_Smes_g4_4	9685045	9687046	7.58256	1	MSTRG.4288:MSTRG.4289:MSTRG.22163:MSTRG.16827:MSTRG.9571:MSTRG.624:MSTRG.11386:MSTRG.22087:MSTRG.10044:MSTRG.5025	hinfp-1:hinfp-2:rest-1:zfp674:znf-1:znf91:znf333-1:znf652:zscan2-2:zscan2-6
32836	dd_Smes_g4_4	9686277	9686296	CTCF_MA0139.1	9.08537	+	dd_Smes_g4_4	9685045	9687046	11.9617	1	MSTRG.4288:MSTRG.4289:MSTRG.22163:MSTRG.16827:MSTRG.9571:MSTRG.624:MSTRG.11386:MSTRG.22087:MSTRG.10044:MSTRG.5025	hinfp-1:hinfp-2:rest-1:zfp674:znf-1:znf91:znf333-1:znf652:zscan2-2:zscan2-6
32853	dd_Smes_g4_4	12518702	12518721	CTCF_MA0139.1	5.98109	-	dd_Smes_g4_4	12517132	12519133	9.82282	1	MSTRG.4288:MSTRG.4289:MSTRG.22163:MSTRG.16827:MSTRG.9571:MSTRG.624:MSTRG.11386:MSTRG.22087:MSTRG.10044:MSTRG.5025	hinfp-1:hinfp-2:rest-1:zfp674:znf-1:znf91:znf333-1:znf652:zscan2-2:zscan2-6
32857	dd_Smes_g4_4	12532507	12532526	CTCF_MA0139.1	5.58824	-	dd_Smes_g4_4	12529133	12533709	7.81629	1	MSTRG.4288:MSTRG.4289:MSTRG.22163:MSTRG.16827:MSTRG.9571:MSTRG.624:MSTRG.11386:MSTRG.22087:MSTRG.10044:MSTRG.5025	hinfp-1:hinfp-2:rest-1:zfp674:znf-1:znf91:znf333-1:znf652:zscan2-2:zscan2-6
32876	dd_Smes_g4_40	1059149	1059168	CTCF_MA0139.1	4.79423	+	dd_Smes_g4_40	1058241	1060242	8.24316	1	MSTRG.4288:MSTRG.4289:MSTRG.22163:MSTRG.16827:MSTRG.9571:MSTRG.624:MSTRG.11386:MSTRG.22087:MSTRG.10044:MSTRG.5025	hinfp-1:hinfp-2:rest-1:zfp674:znf-1:znf91:znf333-1:znf652:zscan2-2:zscan2-6
32893	dd_Smes_g4_40	3419718	3419737	CTCF_MA0139.1	4.63026	-	dd_Smes_g4_40	3419078	3425029	8.62782	1	MSTRG.4288:MSTRG.4289:MSTRG.22163:MSTRG.16827:MSTRG.9571:MSTRG.624:MSTRG.11386:MSTRG.22087:MSTRG.10044:MSTRG.5025	hinfp-1:hinfp-2:rest-1:zfp674:znf-1:znf91:znf333-1:znf652:zscan2-2:zscan2-6
32895	dd_Smes_g4_40	3423419	3423438	CTCF_MA0139.1	14.8898	-	dd_Smes_g4_40	3419078	3425029	7.60629	1	MSTRG.4288:MSTRG.4289:MSTRG.22163:MSTRG.16827:MSTRG.9571:MSTRG.624:MSTRG.11386:MSTRG.22087:MSTRG.10044:MSTRG.5025	hinfp-1:hinfp-2:rest-1:zfp674:znf-1:znf91:znf333-1:znf652:zscan2-2:zscan2-6
32900	dd_Smes_g4_40	3639912	3639931	CTCF_MA0139.1	6.39142	+	dd_Smes_g4_40	3639646	3641647	7.80104	1	MSTRG.4288:MSTRG.4289:MSTRG.22163:MSTRG.16827:MSTRG.9571:MSTRG.624:MSTRG.11386:MSTRG.22087:MSTRG.10044:MSTRG.5025	hinfp-1:hinfp-2:rest-1:zfp674:znf-1:znf91:znf333-1:znf652:zscan2-2:zscan2-6
32914	dd_Smes_g4_42	569529	569548	CTCF_MA0139.1	5.64727	+	dd_Smes_g4_42	567432	569596	7.41403	1	MSTRG.4288:MSTRG.4289:MSTRG.22163:MSTRG.16827:MSTRG.9571:MSTRG.624:MSTRG.11386:MSTRG.22087:MSTRG.10044:MSTRG.5025	hinfp-1:hinfp-2:rest-1:zfp674:znf-1:znf91:znf333-1:znf652:zscan2-2:zscan2-6
32922	dd_Smes_g4_42	1443527	1443546	CTCF_MA0139.1	6.16537	-	dd_Smes_g4_42	1440249	1444861	9.52068	1	MSTRG.4288:MSTRG.4289:MSTRG.22163:MSTRG.16827:MSTRG.9571:MSTRG.624:MSTRG.11386:MSTRG.22087:MSTRG.10044:MSTRG.5025	hinfp-1:hinfp-2:rest-1:zfp674:znf-1:znf91:znf333-1:znf652:zscan2-2:zscan2-6
32930	dd_Smes_g4_428	29048	29067	CTCF_MA0139.1	3.72607	-	dd_Smes_g4_428	27933	29934	59.2177	1	MSTRG.4288:MSTRG.4289:MSTRG.22163:MSTRG.16827:MSTRG.9571:MSTRG.624:MSTRG.11386:MSTRG.22087:MSTRG.10044:MSTRG.5025	hinfp-1:hinfp-2:rest-1:zfp674:znf-1:znf91:znf333-1:znf652:zscan2-2:zscan2-6
32953	dd_Smes_g4_44	1484543	1484562	CTCF_MA0139.1	8.91057	-	dd_Smes_g4_44	1483679	1485680	13.2831	1	MSTRG.4288:MSTRG.4289:MSTRG.22163:MSTRG.16827:MSTRG.9571:MSTRG.624:MSTRG.11386:MSTRG.22087:MSTRG.10044:MSTRG.5025	hinfp-1:hinfp-2:rest-1:zfp674:znf-1:znf91:znf333-1:znf652:zscan2-2:zscan2-6
32960	dd_Smes_g4_44	3809556	3809575	CTCF_MA0139.1	5.94509	-	dd_Smes_g4_44	3807832	3811020	7.78459	1	MSTRG.4288:MSTRG.4289:MSTRG.22163:MSTRG.16827:MSTRG.9571:MSTRG.624:MSTRG.11386:MSTRG.22087:MSTRG.10044:MSTRG.5025	hinfp-1:hinfp-2:rest-1:zfp674:znf-1:znf91:znf333-1:znf652:zscan2-2:zscan2-6
32967	dd_Smes_g4_45	1265648	1265667	CTCF_MA0139.1	4.78431	+	dd_Smes_g4_45	1263365	1267424	9.45922	1	MSTRG.4288:MSTRG.4289:MSTRG.22163:MSTRG.16827:MSTRG.9571:MSTRG.624:MSTRG.11386:MSTRG.22087:MSTRG.10044:MSTRG.5025	hinfp-1:hinfp-2:rest-1:zfp674:znf-1:znf91:znf333-1:znf652:zscan2-2:zscan2-6
32968	dd_Smes_g4_45	1265757	1265776	CTCF_MA0139.1	4.32027	+	dd_Smes_g4_45	1263365	1267424	10.6922	1	MSTRG.4288:MSTRG.4289:MSTRG.22163:MSTRG.16827:MSTRG.9571:MSTRG.624:MSTRG.11386:MSTRG.22087:MSTRG.10044:MSTRG.5025	hinfp-1:hinfp-2:rest-1:zfp674:znf-1:znf91:znf333-1:znf652:zscan2-2:zscan2-6
32983	dd_Smes_g4_45	3709479	3709498	CTCF_MA0139.1	4.98993	+	dd_Smes_g4_45	3708757	3710758	9.92393	1	MSTRG.4288:MSTRG.4289:MSTRG.22163:MSTRG.16827:MSTRG.9571:MSTRG.624:MSTRG.11386:MSTRG.22087:MSTRG.10044:MSTRG.5025	hinfp-1:hinfp-2:rest-1:zfp674:znf-1:znf91:znf333-1:znf652:zscan2-2:zscan2-6
32984	dd_Smes_g4_45	3709693	3709712	CTCF_MA0139.1	6.86805	+	dd_Smes_g4_45	3708757	3710758	7.51579	1	MSTRG.4288:MSTRG.4289:MSTRG.22163:MSTRG.16827:MSTRG.9571:MSTRG.624:MSTRG.11386:MSTRG.22087:MSTRG.10044:MSTRG.5025	hinfp-1:hinfp-2:rest-1:zfp674:znf-1:znf91:znf333-1:znf652:zscan2-2:zscan2-6
32986	dd_Smes_g4_45	3709867	3709886	CTCF_MA0139.1	7.24189	+	dd_Smes_g4_45	3708757	3710758	7.83251	1	MSTRG.4288:MSTRG.4289:MSTRG.22163:MSTRG.16827:MSTRG.9571:MSTRG.624:MSTRG.11386:MSTRG.22087:MSTRG.10044:MSTRG.5025	hinfp-1:hinfp-2:rest-1:zfp674:znf-1:znf91:znf333-1:znf652:zscan2-2:zscan2-6
33019	dd_Smes_g4_47	2900111	2900130	CTCF_MA0139.1	11.683	-	dd_Smes_g4_47	2899017	2901018	8.81428	1	MSTRG.4288:MSTRG.4289:MSTRG.22163:MSTRG.16827:MSTRG.9571:MSTRG.624:MSTRG.11386:MSTRG.22087:MSTRG.10044:MSTRG.5025	hinfp-1:hinfp-2:rest-1:zfp674:znf-1:znf91:znf333-1:znf652:zscan2-2:zscan2-6
33037	dd_Smes_g4_49	292532	292551	CTCF_MA0139.1	4.187	-	dd_Smes_g4_49	291934	293935	7.82624	1	MSTRG.4288:MSTRG.4289:MSTRG.22163:MSTRG.16827:MSTRG.9571:MSTRG.624:MSTRG.11386:MSTRG.22087:MSTRG.10044:MSTRG.5025	hinfp-1:hinfp-2:rest-1:zfp674:znf-1:znf91:znf333-1:znf652:zscan2-2:zscan2-6
33041	dd_Smes_g4_49	303394	303413	CTCF_MA0139.1	7.9575	-	dd_Smes_g4_49	302520	304521	7.70084	1	MSTRG.4288:MSTRG.4289:MSTRG.22163:MSTRG.16827:MSTRG.9571:MSTRG.624:MSTRG.11386:MSTRG.22087:MSTRG.10044:MSTRG.5025	hinfp-1:hinfp-2:rest-1:zfp674:znf-1:znf91:znf333-1:znf652:zscan2-2:zscan2-6
33043	dd_Smes_g4_49	303472	303491	CTCF_MA0139.1	7.33176	-	dd_Smes_g4_49	302520	304521	8.62724	1	MSTRG.4288:MSTRG.4289:MSTRG.22163:MSTRG.16827:MSTRG.9571:MSTRG.624:MSTRG.11386:MSTRG.22087:MSTRG.10044:MSTRG.5025	hinfp-1:hinfp-2:rest-1:zfp674:znf-1:znf91:znf333-1:znf652:zscan2-2:zscan2-6
33044	dd_Smes_g4_49	303493	303512	CTCF_MA0139.1	8.33756	-	dd_Smes_g4_49	302520	304521	8.40932	1	MSTRG.4288:MSTRG.4289:MSTRG.22163:MSTRG.16827:MSTRG.9571:MSTRG.624:MSTRG.11386:MSTRG.22087:MSTRG.10044:MSTRG.5025	hinfp-1:hinfp-2:rest-1:zfp674:znf-1:znf91:znf333-1:znf652:zscan2-2:zscan2-6
33045	dd_Smes_g4_49	303541	303560	CTCF_MA0139.1	17.9776	-	dd_Smes_g4_49	302520	304521	8.13387	1	MSTRG.4288:MSTRG.4289:MSTRG.22163:MSTRG.16827:MSTRG.9571:MSTRG.624:MSTRG.11386:MSTRG.22087:MSTRG.10044:MSTRG.5025	hinfp-1:hinfp-2:rest-1:zfp674:znf-1:znf91:znf333-1:znf652:zscan2-2:zscan2-6
33048	dd_Smes_g4_49	303658	303677	CTCF_MA0139.1	14.1262	-	dd_Smes_g4_49	302520	304521	7.54441	1	MSTRG.4288:MSTRG.4289:MSTRG.22163:MSTRG.16827:MSTRG.9571:MSTRG.624:MSTRG.11386:MSTRG.22087:MSTRG.10044:MSTRG.5025	hinfp-1:hinfp-2:rest-1:zfp674:znf-1:znf91:znf333-1:znf652:zscan2-2:zscan2-6
33098	dd_Smes_g4_5	9182666	9182685	CTCF_MA0139.1	5.14885	+	dd_Smes_g4_5	9179200	9183143	13.4077	1	MSTRG.4288:MSTRG.4289:MSTRG.22163:MSTRG.16827:MSTRG.9571:MSTRG.624:MSTRG.11386:MSTRG.22087:MSTRG.10044:MSTRG.5025	hinfp-1:hinfp-2:rest-1:zfp674:znf-1:znf91:znf333-1:znf652:zscan2-2:zscan2-6
33123	dd_Smes_g4_5	12584726	12584745	CTCF_MA0139.1	4.43858	-	dd_Smes_g4_5	12583395	12585396	7.72568	1	MSTRG.4288:MSTRG.4289:MSTRG.22163:MSTRG.16827:MSTRG.9571:MSTRG.624:MSTRG.11386:MSTRG.22087:MSTRG.10044:MSTRG.5025	hinfp-1:hinfp-2:rest-1:zfp674:znf-1:znf91:znf333-1:znf652:zscan2-2:zscan2-6
33128	dd_Smes_g4_50	643519	643538	CTCF_MA0139.1	4.12207	-	dd_Smes_g4_50	641648	643649	13.2717	1	MSTRG.4288:MSTRG.4289:MSTRG.22163:MSTRG.16827:MSTRG.9571:MSTRG.624:MSTRG.11386:MSTRG.22087:MSTRG.10044:MSTRG.5025	hinfp-1:hinfp-2:rest-1:zfp674:znf-1:znf91:znf333-1:znf652:zscan2-2:zscan2-6
33136	dd_Smes_g4_50	1827228	1827247	CTCF_MA0139.1	3.83614	+	dd_Smes_g4_50	1826178	1828801	7.66536	1	MSTRG.4288:MSTRG.4289:MSTRG.22163:MSTRG.16827:MSTRG.9571:MSTRG.624:MSTRG.11386:MSTRG.22087:MSTRG.10044:MSTRG.5025	hinfp-1:hinfp-2:rest-1:zfp674:znf-1:znf91:znf333-1:znf652:zscan2-2:zscan2-6
33170	dd_Smes_g4_51	863444	863463	CTCF_MA0139.1	4.65805	-	dd_Smes_g4_51	862420	864478	7.42228	1	MSTRG.4288:MSTRG.4289:MSTRG.22163:MSTRG.16827:MSTRG.9571:MSTRG.624:MSTRG.11386:MSTRG.22087:MSTRG.10044:MSTRG.5025	hinfp-1:hinfp-2:rest-1:zfp674:znf-1:znf91:znf333-1:znf652:zscan2-2:zscan2-6
33176	dd_Smes_g4_51	3086041	3086060	CTCF_MA0139.1	7.64008	+	dd_Smes_g4_51	3084934	3086935	8.75189	1	MSTRG.4288:MSTRG.4289:MSTRG.22163:MSTRG.16827:MSTRG.9571:MSTRG.624:MSTRG.11386:MSTRG.22087:MSTRG.10044:MSTRG.5025	hinfp-1:hinfp-2:rest-1:zfp674:znf-1:znf91:znf333-1:znf652:zscan2-2:zscan2-6
33180	dd_Smes_g4_51	3237852	3237871	CTCF_MA0139.1	6.98954	-	dd_Smes_g4_51	3236834	3239556	7.64524	1	MSTRG.4288:MSTRG.4289:MSTRG.22163:MSTRG.16827:MSTRG.9571:MSTRG.624:MSTRG.11386:MSTRG.22087:MSTRG.10044:MSTRG.5025	hinfp-1:hinfp-2:rest-1:zfp674:znf-1:znf91:znf333-1:znf652:zscan2-2:zscan2-6
33185	dd_Smes_g4_52	848085	848104	CTCF_MA0139.1	4.82372	+	dd_Smes_g4_52	847428	849429	8.59104	1	MSTRG.4288:MSTRG.4289:MSTRG.22163:MSTRG.16827:MSTRG.9571:MSTRG.624:MSTRG.11386:MSTRG.22087:MSTRG.10044:MSTRG.5025	hinfp-1:hinfp-2:rest-1:zfp674:znf-1:znf91:znf333-1:znf652:zscan2-2:zscan2-6
33191	dd_Smes_g4_52	2627904	2627923	CTCF_MA0139.1	3.82241	-	dd_Smes_g4_52	2627040	2629041	7.56892	1	MSTRG.4288:MSTRG.4289:MSTRG.22163:MSTRG.16827:MSTRG.9571:MSTRG.624:MSTRG.11386:MSTRG.22087:MSTRG.10044:MSTRG.5025	hinfp-1:hinfp-2:rest-1:zfp674:znf-1:znf91:znf333-1:znf652:zscan2-2:zscan2-6
33213	dd_Smes_g4_53	2359579	2359598	CTCF_MA0139.1	4.14024	-	dd_Smes_g4_53	2358885	2360886	7.71956	1	MSTRG.4288:MSTRG.4289:MSTRG.22163:MSTRG.16827:MSTRG.9571:MSTRG.624:MSTRG.11386:MSTRG.22087:MSTRG.10044:MSTRG.5025	hinfp-1:hinfp-2:rest-1:zfp674:znf-1:znf91:znf333-1:znf652:zscan2-2:zscan2-6
33260	dd_Smes_g4_55	6016	6035	CTCF_MA0139.1	7.63212	+	dd_Smes_g4_55	5096	7097	38.3541	1	MSTRG.4288:MSTRG.4289:MSTRG.22163:MSTRG.16827:MSTRG.9571:MSTRG.624:MSTRG.11386:MSTRG.22087:MSTRG.10044:MSTRG.5025	hinfp-1:hinfp-2:rest-1:zfp674:znf-1:znf91:znf333-1:znf652:zscan2-2:zscan2-6
33261	dd_Smes_g4_55	6368	6387	CTCF_MA0139.1	7.63212	+	dd_Smes_g4_55	5096	7097	32.1892	1	MSTRG.4288:MSTRG.4289:MSTRG.22163:MSTRG.16827:MSTRG.9571:MSTRG.624:MSTRG.11386:MSTRG.22087:MSTRG.10044:MSTRG.5025	hinfp-1:hinfp-2:rest-1:zfp674:znf-1:znf91:znf333-1:znf652:zscan2-2:zscan2-6
33285	dd_Smes_g4_55	2919276	2919295	CTCF_MA0139.1	4.47252	+	dd_Smes_g4_55	2918302	2920303	7.4896	1	MSTRG.4288:MSTRG.4289:MSTRG.22163:MSTRG.16827:MSTRG.9571:MSTRG.624:MSTRG.11386:MSTRG.22087:MSTRG.10044:MSTRG.5025	hinfp-1:hinfp-2:rest-1:zfp674:znf-1:znf91:znf333-1:znf652:zscan2-2:zscan2-6
33307	dd_Smes_g4_57	1782217	1782236	CTCF_MA0139.1	5.5188	-	dd_Smes_g4_57	1782010	1784011	8.86066	1	MSTRG.4288:MSTRG.4289:MSTRG.22163:MSTRG.16827:MSTRG.9571:MSTRG.624:MSTRG.11386:MSTRG.22087:MSTRG.10044:MSTRG.5025	hinfp-1:hinfp-2:rest-1:zfp674:znf-1:znf91:znf333-1:znf652:zscan2-2:zscan2-6
33308	dd_Smes_g4_57	1782802	1782821	CTCF_MA0139.1	5.09524	-	dd_Smes_g4_57	1782010	1784011	8.04553	1	MSTRG.4288:MSTRG.4289:MSTRG.22163:MSTRG.16827:MSTRG.9571:MSTRG.624:MSTRG.11386:MSTRG.22087:MSTRG.10044:MSTRG.5025	hinfp-1:hinfp-2:rest-1:zfp674:znf-1:znf91:znf333-1:znf652:zscan2-2:zscan2-6
33447	dd_Smes_g4_60	520028	520047	CTCF_MA0139.1	6.936	-	dd_Smes_g4_60	518700	520701	9.00256	1	MSTRG.4288:MSTRG.4289:MSTRG.22163:MSTRG.16827:MSTRG.9571:MSTRG.624:MSTRG.11386:MSTRG.22087:MSTRG.10044:MSTRG.5025	hinfp-1:hinfp-2:rest-1:zfp674:znf-1:znf91:znf333-1:znf652:zscan2-2:zscan2-6
33449	dd_Smes_g4_60	520182	520201	CTCF_MA0139.1	6.96508	-	dd_Smes_g4_60	518700	520701	8.28043	1	MSTRG.4288:MSTRG.4289:MSTRG.22163:MSTRG.16827:MSTRG.9571:MSTRG.624:MSTRG.11386:MSTRG.22087:MSTRG.10044:MSTRG.5025	hinfp-1:hinfp-2:rest-1:zfp674:znf-1:znf91:znf333-1:znf652:zscan2-2:zscan2-6
33450	dd_Smes_g4_60	520381	520400	CTCF_MA0139.1	7.37253	+	dd_Smes_g4_60	518700	520701	8.42619	1	MSTRG.4288:MSTRG.4289:MSTRG.22163:MSTRG.16827:MSTRG.9571:MSTRG.624:MSTRG.11386:MSTRG.22087:MSTRG.10044:MSTRG.5025	hinfp-1:hinfp-2:rest-1:zfp674:znf-1:znf91:znf333-1:znf652:zscan2-2:zscan2-6
33465	dd_Smes_g4_60	3645289	3645308	CTCF_MA0139.1	7.73595	+	dd_Smes_g4_60	3644359	3646360	8.10039	1	MSTRG.4288:MSTRG.4289:MSTRG.22163:MSTRG.16827:MSTRG.9571:MSTRG.624:MSTRG.11386:MSTRG.22087:MSTRG.10044:MSTRG.5025	hinfp-1:hinfp-2:rest-1:zfp674:znf-1:znf91:znf333-1:znf652:zscan2-2:zscan2-6
33516	dd_Smes_g4_64	1533240	1533259	CTCF_MA0139.1	4.60991	-	dd_Smes_g4_64	1531804	1533805	7.41591	1	MSTRG.4288:MSTRG.4289:MSTRG.22163:MSTRG.16827:MSTRG.9571:MSTRG.624:MSTRG.11386:MSTRG.22087:MSTRG.10044:MSTRG.5025	hinfp-1:hinfp-2:rest-1:zfp674:znf-1:znf91:znf333-1:znf652:zscan2-2:zscan2-6
33519	dd_Smes_g4_64	1654460	1654479	CTCF_MA0139.1	6.93663	+	dd_Smes_g4_64	1653321	1655528	8.72114	1	MSTRG.4288:MSTRG.4289:MSTRG.22163:MSTRG.16827:MSTRG.9571:MSTRG.624:MSTRG.11386:MSTRG.22087:MSTRG.10044:MSTRG.5025	hinfp-1:hinfp-2:rest-1:zfp674:znf-1:znf91:znf333-1:znf652:zscan2-2:zscan2-6
33529	dd_Smes_g4_64	1836828	1836847	CTCF_MA0139.1	4.08151	-	dd_Smes_g4_64	1835937	1837938	7.74621	1	MSTRG.4288:MSTRG.4289:MSTRG.22163:MSTRG.16827:MSTRG.9571:MSTRG.624:MSTRG.11386:MSTRG.22087:MSTRG.10044:MSTRG.5025	hinfp-1:hinfp-2:rest-1:zfp674:znf-1:znf91:znf333-1:znf652:zscan2-2:zscan2-6
33530	dd_Smes_g4_64	1836974	1836993	CTCF_MA0139.1	4.51957	+	dd_Smes_g4_64	1835937	1837938	9.89746	1	MSTRG.4288:MSTRG.4289:MSTRG.22163:MSTRG.16827:MSTRG.9571:MSTRG.624:MSTRG.11386:MSTRG.22087:MSTRG.10044:MSTRG.5025	hinfp-1:hinfp-2:rest-1:zfp674:znf-1:znf91:znf333-1:znf652:zscan2-2:zscan2-6
33640	dd_Smes_g4_7	2355042	2355061	CTCF_MA0139.1	4.19015	-	dd_Smes_g4_7	2354291	2356849	13.9171	1	MSTRG.4288:MSTRG.4289:MSTRG.22163:MSTRG.16827:MSTRG.9571:MSTRG.624:MSTRG.11386:MSTRG.22087:MSTRG.10044:MSTRG.5025	hinfp-1:hinfp-2:rest-1:zfp674:znf-1:znf91:znf333-1:znf652:zscan2-2:zscan2-6
33641	dd_Smes_g4_7	2355288	2355307	CTCF_MA0139.1	4.7377	-	dd_Smes_g4_7	2354291	2356849	18.2534	1	MSTRG.4288:MSTRG.4289:MSTRG.22163:MSTRG.16827:MSTRG.9571:MSTRG.624:MSTRG.11386:MSTRG.22087:MSTRG.10044:MSTRG.5025	hinfp-1:hinfp-2:rest-1:zfp674:znf-1:znf91:znf333-1:znf652:zscan2-2:zscan2-6
33642	dd_Smes_g4_7	2355915	2355934	CTCF_MA0139.1	3.71258	+	dd_Smes_g4_7	2354291	2356849	384.01	1	MSTRG.4288:MSTRG.4289:MSTRG.22163:MSTRG.16827:MSTRG.9571:MSTRG.624:MSTRG.11386:MSTRG.22087:MSTRG.10044:MSTRG.5025	hinfp-1:hinfp-2:rest-1:zfp674:znf-1:znf91:znf333-1:znf652:zscan2-2:zscan2-6
33664	dd_Smes_g4_70	845341	845360	CTCF_MA0139.1	4.26842	+	dd_Smes_g4_70	844206	846207	12.0417	1	MSTRG.4288:MSTRG.4289:MSTRG.22163:MSTRG.16827:MSTRG.9571:MSTRG.624:MSTRG.11386:MSTRG.22087:MSTRG.10044:MSTRG.5025	hinfp-1:hinfp-2:rest-1:zfp674:znf-1:znf91:znf333-1:znf652:zscan2-2:zscan2-6
33665	dd_Smes_g4_70	1051166	1051185	CTCF_MA0139.1	3.80702	+	dd_Smes_g4_70	1050342	1052343	10.4165	1	MSTRG.4288:MSTRG.4289:MSTRG.22163:MSTRG.16827:MSTRG.9571:MSTRG.624:MSTRG.11386:MSTRG.22087:MSTRG.10044:MSTRG.5025	hinfp-1:hinfp-2:rest-1:zfp674:znf-1:znf91:znf333-1:znf652:zscan2-2:zscan2-6
33674	dd_Smes_g4_70	1517439	1517458	CTCF_MA0139.1	5.54448	+	dd_Smes_g4_70	1516576	1518577	7.46431	1	MSTRG.4288:MSTRG.4289:MSTRG.22163:MSTRG.16827:MSTRG.9571:MSTRG.624:MSTRG.11386:MSTRG.22087:MSTRG.10044:MSTRG.5025	hinfp-1:hinfp-2:rest-1:zfp674:znf-1:znf91:znf333-1:znf652:zscan2-2:zscan2-6
33679	dd_Smes_g4_70	2783995	2784014	CTCF_MA0139.1	8.17903	+	dd_Smes_g4_70	2782978	2784979	7.77662	1	MSTRG.4288:MSTRG.4289:MSTRG.22163:MSTRG.16827:MSTRG.9571:MSTRG.624:MSTRG.11386:MSTRG.22087:MSTRG.10044:MSTRG.5025	hinfp-1:hinfp-2:rest-1:zfp674:znf-1:znf91:znf333-1:znf652:zscan2-2:zscan2-6
33686	dd_Smes_g4_71	230484	230503	CTCF_MA0139.1	7.08561	+	dd_Smes_g4_71	229142	231143	7.84049	1	MSTRG.4288:MSTRG.4289:MSTRG.22163:MSTRG.16827:MSTRG.9571:MSTRG.624:MSTRG.11386:MSTRG.22087:MSTRG.10044:MSTRG.5025	hinfp-1:hinfp-2:rest-1:zfp674:znf-1:znf91:znf333-1:znf652:zscan2-2:zscan2-6
33716	dd_Smes_g4_73	939981	940000	CTCF_MA0139.1	7.17673	+	dd_Smes_g4_73	937628	941292	8.24408	1	MSTRG.4288:MSTRG.4289:MSTRG.22163:MSTRG.16827:MSTRG.9571:MSTRG.624:MSTRG.11386:MSTRG.22087:MSTRG.10044:MSTRG.5025	hinfp-1:hinfp-2:rest-1:zfp674:znf-1:znf91:znf333-1:znf652:zscan2-2:zscan2-6
33731	dd_Smes_g4_73	2248301	2248320	CTCF_MA0139.1	4.98218	-	dd_Smes_g4_73	2247363	2249415	8.0779	1	MSTRG.4288:MSTRG.4289:MSTRG.22163:MSTRG.16827:MSTRG.9571:MSTRG.624:MSTRG.11386:MSTRG.22087:MSTRG.10044:MSTRG.5025	hinfp-1:hinfp-2:rest-1:zfp674:znf-1:znf91:znf333-1:znf652:zscan2-2:zscan2-6
33736	dd_Smes_g4_74	229315	229334	CTCF_MA0139.1	5.01557	-	dd_Smes_g4_74	228254	230255	7.77891	1	MSTRG.4288:MSTRG.4289:MSTRG.22163:MSTRG.16827:MSTRG.9571:MSTRG.624:MSTRG.11386:MSTRG.22087:MSTRG.10044:MSTRG.5025	hinfp-1:hinfp-2:rest-1:zfp674:znf-1:znf91:znf333-1:znf652:zscan2-2:zscan2-6
33739	dd_Smes_g4_74	1897268	1897287	CTCF_MA0139.1	6.36462	+	dd_Smes_g4_74	1896342	1898343	8.81053	1	MSTRG.4288:MSTRG.4289:MSTRG.22163:MSTRG.16827:MSTRG.9571:MSTRG.624:MSTRG.11386:MSTRG.22087:MSTRG.10044:MSTRG.5025	hinfp-1:hinfp-2:rest-1:zfp674:znf-1:znf91:znf333-1:znf652:zscan2-2:zscan2-6
33742	dd_Smes_g4_74	2308517	2308536	CTCF_MA0139.1	3.69728	+	dd_Smes_g4_74	2305958	2311062	7.68589	1	MSTRG.4288:MSTRG.4289:MSTRG.22163:MSTRG.16827:MSTRG.9571:MSTRG.624:MSTRG.11386:MSTRG.22087:MSTRG.10044:MSTRG.5025	hinfp-1:hinfp-2:rest-1:zfp674:znf-1:znf91:znf333-1:znf652:zscan2-2:zscan2-6
33745	dd_Smes_g4_74	2316124	2316143	CTCF_MA0139.1	4.42942	+	dd_Smes_g4_74	2314738	2318799	7.66564	1	MSTRG.4288:MSTRG.4289:MSTRG.22163:MSTRG.16827:MSTRG.9571:MSTRG.624:MSTRG.11386:MSTRG.22087:MSTRG.10044:MSTRG.5025	hinfp-1:hinfp-2:rest-1:zfp674:znf-1:znf91:znf333-1:znf652:zscan2-2:zscan2-6
33779	dd_Smes_g4_75	2473034	2473053	CTCF_MA0139.1	6.14302	+	dd_Smes_g4_75	2471849	2473850	7.81916	1	MSTRG.4288:MSTRG.4289:MSTRG.22163:MSTRG.16827:MSTRG.9571:MSTRG.624:MSTRG.11386:MSTRG.22087:MSTRG.10044:MSTRG.5025	hinfp-1:hinfp-2:rest-1:zfp674:znf-1:znf91:znf333-1:znf652:zscan2-2:zscan2-6
33796	dd_Smes_g4_76	2507678	2507697	CTCF_MA0139.1	4.43512	-	dd_Smes_g4_76	2506529	2509173	7.72022	1	MSTRG.4288:MSTRG.4289:MSTRG.22163:MSTRG.16827:MSTRG.9571:MSTRG.624:MSTRG.11386:MSTRG.22087:MSTRG.10044:MSTRG.5025	hinfp-1:hinfp-2:rest-1:zfp674:znf-1:znf91:znf333-1:znf652:zscan2-2:zscan2-6
33797	dd_Smes_g4_76	2514273	2514292	CTCF_MA0139.1	13.1593	-	dd_Smes_g4_76	2514194	2518625	7.45549	1	MSTRG.4288:MSTRG.4289:MSTRG.22163:MSTRG.16827:MSTRG.9571:MSTRG.624:MSTRG.11386:MSTRG.22087:MSTRG.10044:MSTRG.5025	hinfp-1:hinfp-2:rest-1:zfp674:znf-1:znf91:znf333-1:znf652:zscan2-2:zscan2-6
33804	dd_Smes_g4_76	2516245	2516264	CTCF_MA0139.1	4.7949	-	dd_Smes_g4_76	2514194	2518625	7.87768	1	MSTRG.4288:MSTRG.4289:MSTRG.22163:MSTRG.16827:MSTRG.9571:MSTRG.624:MSTRG.11386:MSTRG.22087:MSTRG.10044:MSTRG.5025	hinfp-1:hinfp-2:rest-1:zfp674:znf-1:znf91:znf333-1:znf652:zscan2-2:zscan2-6
33807	dd_Smes_g4_76	2516502	2516521	CTCF_MA0139.1	4.5789	+	dd_Smes_g4_76	2514194	2518625	8.21405	1	MSTRG.4288:MSTRG.4289:MSTRG.22163:MSTRG.16827:MSTRG.9571:MSTRG.624:MSTRG.11386:MSTRG.22087:MSTRG.10044:MSTRG.5025	hinfp-1:hinfp-2:rest-1:zfp674:znf-1:znf91:znf333-1:znf652:zscan2-2:zscan2-6
33809	dd_Smes_g4_76	2516958	2516977	CTCF_MA0139.1	4.69301	+	dd_Smes_g4_76	2514194	2518625	7.54688	1	MSTRG.4288:MSTRG.4289:MSTRG.22163:MSTRG.16827:MSTRG.9571:MSTRG.624:MSTRG.11386:MSTRG.22087:MSTRG.10044:MSTRG.5025	hinfp-1:hinfp-2:rest-1:zfp674:znf-1:znf91:znf333-1:znf652:zscan2-2:zscan2-6
33812	dd_Smes_g4_76	2520801	2520820	CTCF_MA0139.1	4.53105	-	dd_Smes_g4_76	2518637	2521940	7.45056	1	MSTRG.4288:MSTRG.4289:MSTRG.22163:MSTRG.16827:MSTRG.9571:MSTRG.624:MSTRG.11386:MSTRG.22087:MSTRG.10044:MSTRG.5025	hinfp-1:hinfp-2:rest-1:zfp674:znf-1:znf91:znf333-1:znf652:zscan2-2:zscan2-6
33813	dd_Smes_g4_76	2520839	2520858	CTCF_MA0139.1	6.71237	+	dd_Smes_g4_76	2518637	2521940	9.14493	1	MSTRG.4288:MSTRG.4289:MSTRG.22163:MSTRG.16827:MSTRG.9571:MSTRG.624:MSTRG.11386:MSTRG.22087:MSTRG.10044:MSTRG.5025	hinfp-1:hinfp-2:rest-1:zfp674:znf-1:znf91:znf333-1:znf652:zscan2-2:zscan2-6
33818	dd_Smes_g4_76	2541754	2541773	CTCF_MA0139.1	5.64346	+	dd_Smes_g4_76	2540949	2542950	7.91731	1	MSTRG.4288:MSTRG.4289:MSTRG.22163:MSTRG.16827:MSTRG.9571:MSTRG.624:MSTRG.11386:MSTRG.22087:MSTRG.10044:MSTRG.5025	hinfp-1:hinfp-2:rest-1:zfp674:znf-1:znf91:znf333-1:znf652:zscan2-2:zscan2-6
33827	dd_Smes_g4_76	2616549	2616568	CTCF_MA0139.1	5.99347	+	dd_Smes_g4_76	2615494	2618812	7.7935	1	MSTRG.4288:MSTRG.4289:MSTRG.22163:MSTRG.16827:MSTRG.9571:MSTRG.624:MSTRG.11386:MSTRG.22087:MSTRG.10044:MSTRG.5025	hinfp-1:hinfp-2:rest-1:zfp674:znf-1:znf91:znf333-1:znf652:zscan2-2:zscan2-6
33828	dd_Smes_g4_76	2617483	2617502	CTCF_MA0139.1	3.98843	+	dd_Smes_g4_76	2615494	2618812	7.69078	1	MSTRG.4288:MSTRG.4289:MSTRG.22163:MSTRG.16827:MSTRG.9571:MSTRG.624:MSTRG.11386:MSTRG.22087:MSTRG.10044:MSTRG.5025	hinfp-1:hinfp-2:rest-1:zfp674:znf-1:znf91:znf333-1:znf652:zscan2-2:zscan2-6
33829	dd_Smes_g4_76	2617574	2617593	CTCF_MA0139.1	7.81103	-	dd_Smes_g4_76	2615494	2618812	10.6771	1	MSTRG.4288:MSTRG.4289:MSTRG.22163:MSTRG.16827:MSTRG.9571:MSTRG.624:MSTRG.11386:MSTRG.22087:MSTRG.10044:MSTRG.5025	hinfp-1:hinfp-2:rest-1:zfp674:znf-1:znf91:znf333-1:znf652:zscan2-2:zscan2-6
33830	dd_Smes_g4_76	2617625	2617644	CTCF_MA0139.1	4.56799	-	dd_Smes_g4_76	2615494	2618812	7.44732	1	MSTRG.4288:MSTRG.4289:MSTRG.22163:MSTRG.16827:MSTRG.9571:MSTRG.624:MSTRG.11386:MSTRG.22087:MSTRG.10044:MSTRG.5025	hinfp-1:hinfp-2:rest-1:zfp674:znf-1:znf91:znf333-1:znf652:zscan2-2:zscan2-6
33837	dd_Smes_g4_76	2849422	2849441	CTCF_MA0139.1	5.3677	+	dd_Smes_g4_76	2848657	2850658	9.53337	1	MSTRG.4288:MSTRG.4289:MSTRG.22163:MSTRG.16827:MSTRG.9571:MSTRG.624:MSTRG.11386:MSTRG.22087:MSTRG.10044:MSTRG.5025	hinfp-1:hinfp-2:rest-1:zfp674:znf-1:znf91:znf333-1:znf652:zscan2-2:zscan2-6
33851	dd_Smes_g4_77	2927256	2927275	CTCF_MA0139.1	3.85521	+	dd_Smes_g4_77	2927233	2929234	7.61716	1	MSTRG.4288:MSTRG.4289:MSTRG.22163:MSTRG.16827:MSTRG.9571:MSTRG.624:MSTRG.11386:MSTRG.22087:MSTRG.10044:MSTRG.5025	hinfp-1:hinfp-2:rest-1:zfp674:znf-1:znf91:znf333-1:znf652:zscan2-2:zscan2-6
33875	dd_Smes_g4_78	2186845	2186864	CTCF_MA0139.1	4.22312	-	dd_Smes_g4_78	2185783	2187784	8.53842	1	MSTRG.4288:MSTRG.4289:MSTRG.22163:MSTRG.16827:MSTRG.9571:MSTRG.624:MSTRG.11386:MSTRG.22087:MSTRG.10044:MSTRG.5025	hinfp-1:hinfp-2:rest-1:zfp674:znf-1:znf91:znf333-1:znf652:zscan2-2:zscan2-6
33876	dd_Smes_g4_78	2186890	2186909	CTCF_MA0139.1	5.48435	+	dd_Smes_g4_78	2185783	2187784	8.9428	1	MSTRG.4288:MSTRG.4289:MSTRG.22163:MSTRG.16827:MSTRG.9571:MSTRG.624:MSTRG.11386:MSTRG.22087:MSTRG.10044:MSTRG.5025	hinfp-1:hinfp-2:rest-1:zfp674:znf-1:znf91:znf333-1:znf652:zscan2-2:zscan2-6
33877	dd_Smes_g4_78	2186929	2186948	CTCF_MA0139.1	4.91847	+	dd_Smes_g4_78	2185783	2187784	7.48911	1	MSTRG.4288:MSTRG.4289:MSTRG.22163:MSTRG.16827:MSTRG.9571:MSTRG.624:MSTRG.11386:MSTRG.22087:MSTRG.10044:MSTRG.5025	hinfp-1:hinfp-2:rest-1:zfp674:znf-1:znf91:znf333-1:znf652:zscan2-2:zscan2-6
33888	dd_Smes_g4_78	2886241	2886260	CTCF_MA0139.1	9.39197	+	dd_Smes_g4_78	2884802	2886803	7.82739	1	MSTRG.4288:MSTRG.4289:MSTRG.22163:MSTRG.16827:MSTRG.9571:MSTRG.624:MSTRG.11386:MSTRG.22087:MSTRG.10044:MSTRG.5025	hinfp-1:hinfp-2:rest-1:zfp674:znf-1:znf91:znf333-1:znf652:zscan2-2:zscan2-6
33899	dd_Smes_g4_8	827955	827974	CTCF_MA0139.1	5.13475	+	dd_Smes_g4_8	826509	829088	8.86697	1	MSTRG.4288:MSTRG.4289:MSTRG.22163:MSTRG.16827:MSTRG.9571:MSTRG.624:MSTRG.11386:MSTRG.22087:MSTRG.10044:MSTRG.5025	hinfp-1:hinfp-2:rest-1:zfp674:znf-1:znf91:znf333-1:znf652:zscan2-2:zscan2-6
33921	dd_Smes_g4_8	5084443	5084462	CTCF_MA0139.1	3.67279	-	dd_Smes_g4_8	5082625	5084626	10.3286	1	MSTRG.4288:MSTRG.4289:MSTRG.22163:MSTRG.16827:MSTRG.9571:MSTRG.624:MSTRG.11386:MSTRG.22087:MSTRG.10044:MSTRG.5025	hinfp-1:hinfp-2:rest-1:zfp674:znf-1:znf91:znf333-1:znf652:zscan2-2:zscan2-6
33936	dd_Smes_g4_8	8654203	8654222	CTCF_MA0139.1	4.11233	-	dd_Smes_g4_8	8653169	8655170	7.69154	1	MSTRG.4288:MSTRG.4289:MSTRG.22163:MSTRG.16827:MSTRG.9571:MSTRG.624:MSTRG.11386:MSTRG.22087:MSTRG.10044:MSTRG.5025	hinfp-1:hinfp-2:rest-1:zfp674:znf-1:znf91:znf333-1:znf652:zscan2-2:zscan2-6
33955	dd_Smes_g4_81	2207920	2207939	CTCF_MA0139.1	6.02309	-	dd_Smes_g4_81	2206589	2209211	7.42133	1	MSTRG.4288:MSTRG.4289:MSTRG.22163:MSTRG.16827:MSTRG.9571:MSTRG.624:MSTRG.11386:MSTRG.22087:MSTRG.10044:MSTRG.5025	hinfp-1:hinfp-2:rest-1:zfp674:znf-1:znf91:znf333-1:znf652:zscan2-2:zscan2-6
33960	dd_Smes_g4_81	2593756	2593775	CTCF_MA0139.1	6.1308	+	dd_Smes_g4_81	2593387	2595427	10.2499	1	MSTRG.4288:MSTRG.4289:MSTRG.22163:MSTRG.16827:MSTRG.9571:MSTRG.624:MSTRG.11386:MSTRG.22087:MSTRG.10044:MSTRG.5025	hinfp-1:hinfp-2:rest-1:zfp674:znf-1:znf91:znf333-1:znf652:zscan2-2:zscan2-6
33970	dd_Smes_g4_83	290039	290058	CTCF_MA0139.1	5.98173	+	dd_Smes_g4_83	289642	291643	7.92944	1	MSTRG.4288:MSTRG.4289:MSTRG.22163:MSTRG.16827:MSTRG.9571:MSTRG.624:MSTRG.11386:MSTRG.22087:MSTRG.10044:MSTRG.5025	hinfp-1:hinfp-2:rest-1:zfp674:znf-1:znf91:znf333-1:znf652:zscan2-2:zscan2-6
33991	dd_Smes_g4_83	2403932	2403951	CTCF_MA0139.1	4.61031	-	dd_Smes_g4_83	2401732	2407858	7.93215	1	MSTRG.4288:MSTRG.4289:MSTRG.22163:MSTRG.16827:MSTRG.9571:MSTRG.624:MSTRG.11386:MSTRG.22087:MSTRG.10044:MSTRG.5025	hinfp-1:hinfp-2:rest-1:zfp674:znf-1:znf91:znf333-1:znf652:zscan2-2:zscan2-6
33999	dd_Smes_g4_83	2775208	2775227	CTCF_MA0139.1	3.75287	+	dd_Smes_g4_83	2774013	2776014	8.02923	1	MSTRG.4288:MSTRG.4289:MSTRG.22163:MSTRG.16827:MSTRG.9571:MSTRG.624:MSTRG.11386:MSTRG.22087:MSTRG.10044:MSTRG.5025	hinfp-1:hinfp-2:rest-1:zfp674:znf-1:znf91:znf333-1:znf652:zscan2-2:zscan2-6
34037	dd_Smes_g4_86	1431235	1431254	CTCF_MA0139.1	6.72249	+	dd_Smes_g4_86	1430880	1432881	11.2111	1	MSTRG.4288:MSTRG.4289:MSTRG.22163:MSTRG.16827:MSTRG.9571:MSTRG.624:MSTRG.11386:MSTRG.22087:MSTRG.10044:MSTRG.5025	hinfp-1:hinfp-2:rest-1:zfp674:znf-1:znf91:znf333-1:znf652:zscan2-2:zscan2-6
34088	dd_Smes_g4_89	322744	322763	CTCF_MA0139.1	4.20569	+	dd_Smes_g4_89	321722	323928	7.76486	1	MSTRG.4288:MSTRG.4289:MSTRG.22163:MSTRG.16827:MSTRG.9571:MSTRG.624:MSTRG.11386:MSTRG.22087:MSTRG.10044:MSTRG.5025	hinfp-1:hinfp-2:rest-1:zfp674:znf-1:znf91:znf333-1:znf652:zscan2-2:zscan2-6
34153	dd_Smes_g4_91	318098	318117	CTCF_MA0139.1	6.46185	-	dd_Smes_g4_91	315554	320093	7.5164	1	MSTRG.4288:MSTRG.4289:MSTRG.22163:MSTRG.16827:MSTRG.9571:MSTRG.624:MSTRG.11386:MSTRG.22087:MSTRG.10044:MSTRG.5025	hinfp-1:hinfp-2:rest-1:zfp674:znf-1:znf91:znf333-1:znf652:zscan2-2:zscan2-6
34155	dd_Smes_g4_91	318874	318893	CTCF_MA0139.1	5.41811	-	dd_Smes_g4_91	315554	320093	7.45443	1	MSTRG.4288:MSTRG.4289:MSTRG.22163:MSTRG.16827:MSTRG.9571:MSTRG.624:MSTRG.11386:MSTRG.22087:MSTRG.10044:MSTRG.5025	hinfp-1:hinfp-2:rest-1:zfp674:znf-1:znf91:znf333-1:znf652:zscan2-2:zscan2-6
34166	dd_Smes_g4_91	1877584	1877603	CTCF_MA0139.1	4.57396	+	dd_Smes_g4_91	1876567	1878730	7.67635	1	MSTRG.4288:MSTRG.4289:MSTRG.22163:MSTRG.16827:MSTRG.9571:MSTRG.624:MSTRG.11386:MSTRG.22087:MSTRG.10044:MSTRG.5025	hinfp-1:hinfp-2:rest-1:zfp674:znf-1:znf91:znf333-1:znf652:zscan2-2:zscan2-6
34167	dd_Smes_g4_91	2025718	2025737	CTCF_MA0139.1	10.1279	-	dd_Smes_g4_91	2024935	2026936	7.58368	1	MSTRG.4288:MSTRG.4289:MSTRG.22163:MSTRG.16827:MSTRG.9571:MSTRG.624:MSTRG.11386:MSTRG.22087:MSTRG.10044:MSTRG.5025	hinfp-1:hinfp-2:rest-1:zfp674:znf-1:znf91:znf333-1:znf652:zscan2-2:zscan2-6
34176	dd_Smes_g4_93	474118	474137	CTCF_MA0139.1	4.23199	+	dd_Smes_g4_93	473321	475322	9.69469	1	MSTRG.4288:MSTRG.4289:MSTRG.22163:MSTRG.16827:MSTRG.9571:MSTRG.624:MSTRG.11386:MSTRG.22087:MSTRG.10044:MSTRG.5025	hinfp-1:hinfp-2:rest-1:zfp674:znf-1:znf91:znf333-1:znf652:zscan2-2:zscan2-6
34177	dd_Smes_g4_93	474239	474258	CTCF_MA0139.1	8.8332	+	dd_Smes_g4_93	473321	475322	11.1042	1	MSTRG.4288:MSTRG.4289:MSTRG.22163:MSTRG.16827:MSTRG.9571:MSTRG.624:MSTRG.11386:MSTRG.22087:MSTRG.10044:MSTRG.5025	hinfp-1:hinfp-2:rest-1:zfp674:znf-1:znf91:znf333-1:znf652:zscan2-2:zscan2-6
34178	dd_Smes_g4_93	499207	499226	CTCF_MA0139.1	4.70141	-	dd_Smes_g4_93	499177	501879	9.30608	1	MSTRG.4288:MSTRG.4289:MSTRG.22163:MSTRG.16827:MSTRG.9571:MSTRG.624:MSTRG.11386:MSTRG.22087:MSTRG.10044:MSTRG.5025	hinfp-1:hinfp-2:rest-1:zfp674:znf-1:znf91:znf333-1:znf652:zscan2-2:zscan2-6
34184	dd_Smes_g4_94	768013	768032	CTCF_MA0139.1	7.34519	+	dd_Smes_g4_94	766987	768988	7.46015	1	MSTRG.4288:MSTRG.4289:MSTRG.22163:MSTRG.16827:MSTRG.9571:MSTRG.624:MSTRG.11386:MSTRG.22087:MSTRG.10044:MSTRG.5025	hinfp-1:hinfp-2:rest-1:zfp674:znf-1:znf91:znf333-1:znf652:zscan2-2:zscan2-6
34195	dd_Smes_g4_94	1957139	1957158	CTCF_MA0139.1	5.61453	+	dd_Smes_g4_94	1956166	1958971	27.0691	1	MSTRG.4288:MSTRG.4289:MSTRG.22163:MSTRG.16827:MSTRG.9571:MSTRG.624:MSTRG.11386:MSTRG.22087:MSTRG.10044:MSTRG.5025	hinfp-1:hinfp-2:rest-1:zfp674:znf-1:znf91:znf333-1:znf652:zscan2-2:zscan2-6
34201	dd_Smes_g4_94	2191296	2191315	CTCF_MA0139.1	7.80009	+	dd_Smes_g4_94	2190289	2193585	7.56455	1	MSTRG.4288:MSTRG.4289:MSTRG.22163:MSTRG.16827:MSTRG.9571:MSTRG.624:MSTRG.11386:MSTRG.22087:MSTRG.10044:MSTRG.5025	hinfp-1:hinfp-2:rest-1:zfp674:znf-1:znf91:znf333-1:znf652:zscan2-2:zscan2-6
34212	dd_Smes_g4_94	2270576	2270595	CTCF_MA0139.1	6.96512	-	dd_Smes_g4_94	2268785	2271144	9.91356	1	MSTRG.4288:MSTRG.4289:MSTRG.22163:MSTRG.16827:MSTRG.9571:MSTRG.624:MSTRG.11386:MSTRG.22087:MSTRG.10044:MSTRG.5025	hinfp-1:hinfp-2:rest-1:zfp674:znf-1:znf91:znf333-1:znf652:zscan2-2:zscan2-6
34213	dd_Smes_g4_94	2270719	2270738	CTCF_MA0139.1	7.28428	-	dd_Smes_g4_94	2268785	2271144	12.4047	1	MSTRG.4288:MSTRG.4289:MSTRG.22163:MSTRG.16827:MSTRG.9571:MSTRG.624:MSTRG.11386:MSTRG.22087:MSTRG.10044:MSTRG.5025	hinfp-1:hinfp-2:rest-1:zfp674:znf-1:znf91:znf333-1:znf652:zscan2-2:zscan2-6
34214	dd_Smes_g4_94	2315255	2315274	CTCF_MA0139.1	9.97539	+	dd_Smes_g4_94	2315153	2317154	7.38254	1	MSTRG.4288:MSTRG.4289:MSTRG.22163:MSTRG.16827:MSTRG.9571:MSTRG.624:MSTRG.11386:MSTRG.22087:MSTRG.10044:MSTRG.5025	hinfp-1:hinfp-2:rest-1:zfp674:znf-1:znf91:znf333-1:znf652:zscan2-2:zscan2-6
34215	dd_Smes_g4_94	2316161	2316180	CTCF_MA0139.1	4.64728	-	dd_Smes_g4_94	2315153	2317154	8.71091	1	MSTRG.4288:MSTRG.4289:MSTRG.22163:MSTRG.16827:MSTRG.9571:MSTRG.624:MSTRG.11386:MSTRG.22087:MSTRG.10044:MSTRG.5025	hinfp-1:hinfp-2:rest-1:zfp674:znf-1:znf91:znf333-1:znf652:zscan2-2:zscan2-6
34221	dd_Smes_g4_95	114368	114387	CTCF_MA0139.1	5.48056	+	dd_Smes_g4_95	112796	114797	10.5681	1	MSTRG.4288:MSTRG.4289:MSTRG.22163:MSTRG.16827:MSTRG.9571:MSTRG.624:MSTRG.11386:MSTRG.22087:MSTRG.10044:MSTRG.5025	hinfp-1:hinfp-2:rest-1:zfp674:znf-1:znf91:znf333-1:znf652:zscan2-2:zscan2-6
34224	dd_Smes_g4_95	315989	316008	CTCF_MA0139.1	4.39043	-	dd_Smes_g4_95	315004	317005	7.80429	1	MSTRG.4288:MSTRG.4289:MSTRG.22163:MSTRG.16827:MSTRG.9571:MSTRG.624:MSTRG.11386:MSTRG.22087:MSTRG.10044:MSTRG.5025	hinfp-1:hinfp-2:rest-1:zfp674:znf-1:znf91:znf333-1:znf652:zscan2-2:zscan2-6
34297	dd_Smes_g4_1	2911824	2911839	CTCF_MA0531.1	6.19237	-	dd_Smes_g4_1	2909301	2914441	9.54957	1	MSTRG.20458	rest-2
34300	dd_Smes_g4_1	2912285	2912300	CTCF_MA0531.1	5.53038	+	dd_Smes_g4_1	2909301	2914441	7.91113	1	MSTRG.20458	rest-2
34307	dd_Smes_g4_1	4012846	4012861	CTCF_MA0531.1	5.55311	-	dd_Smes_g4_1	4011925	4013926	8.66503	1	MSTRG.20458	rest-2
34313	dd_Smes_g4_1	4703930	4703945	CTCF_MA0531.1	5.79032	+	dd_Smes_g4_1	4703314	4708303	8.27571	1	MSTRG.20458	rest-2
34349	dd_Smes_g4_1	8172473	8172488	CTCF_MA0531.1	6.4836	-	dd_Smes_g4_1	8170328	8172970	12.2154	1	MSTRG.20458	rest-2
34350	dd_Smes_g4_1	8172614	8172629	CTCF_MA0531.1	5.77217	+	dd_Smes_g4_1	8170328	8172970	11.7061	1	MSTRG.20458	rest-2
34351	dd_Smes_g4_1	8172848	8172863	CTCF_MA0531.1	10.5639	-	dd_Smes_g4_1	8170328	8172970	10.6407	1	MSTRG.20458	rest-2
34453	dd_Smes_g4_10	7288137	7288152	CTCF_MA0531.1	8.09999	+	dd_Smes_g4_10	7286399	7289582	10.2612	1	MSTRG.20458	rest-2
34477	dd_Smes_g4_101	1524379	1524394	CTCF_MA0531.1	9.1266	+	dd_Smes_g4_101	1522934	1524935	7.42869	1	MSTRG.20458	rest-2
34489	dd_Smes_g4_103	400379	400394	CTCF_MA0531.1	7.46592	-	dd_Smes_g4_103	399399	401400	8.11519	1	MSTRG.20458	rest-2
34513	dd_Smes_g4_108	246757	246772	CTCF_MA0531.1	11.005	-	dd_Smes_g4_108	246534	251764	11.0507	1	MSTRG.20458	rest-2
34523	dd_Smes_g4_108	1330300	1330315	CTCF_MA0531.1	7.53023	-	dd_Smes_g4_108	1328618	1330619	7.93659	1	MSTRG.20458	rest-2
34579	dd_Smes_g4_110	485235	485250	CTCF_MA0531.1	7.51218	+	dd_Smes_g4_110	483532	485533	8.16616	1	MSTRG.20458	rest-2
34593	dd_Smes_g4_110	1487905	1487920	CTCF_MA0531.1	9.27077	-	dd_Smes_g4_110	1486216	1489832	7.83431	1	MSTRG.20458	rest-2
34611	dd_Smes_g4_111	916039	916054	CTCF_MA0531.1	7.57302	+	dd_Smes_g4_111	915144	917145	7.38195	1	MSTRG.20458	rest-2
34627	dd_Smes_g4_112	936613	936628	CTCF_MA0531.1	6.25488	+	dd_Smes_g4_112	935661	938503	10.9879	1	MSTRG.20458	rest-2
34661	dd_Smes_g4_114	1789862	1789877	CTCF_MA0531.1	11.1743	-	dd_Smes_g4_114	1788792	1790793	7.58155	1	MSTRG.20458	rest-2
34682	dd_Smes_g4_116	1760506	1760521	CTCF_MA0531.1	7.73484	-	dd_Smes_g4_116	1759570	1761571	7.52119	1	MSTRG.20458	rest-2
34691	dd_Smes_g4_117	1133529	1133544	CTCF_MA0531.1	9.9729	-	dd_Smes_g4_117	1132070	1134123	7.96983	1	MSTRG.20458	rest-2
34702	dd_Smes_g4_117	1494850	1494865	CTCF_MA0531.1	9.49113	+	dd_Smes_g4_117	1493759	1495760	9.82766	1	MSTRG.20458	rest-2
34746	dd_Smes_g4_12	8178650	8178665	CTCF_MA0531.1	9.98872	-	dd_Smes_g4_12	8177820	8179821	10.428	1	MSTRG.20458	rest-2
34747	dd_Smes_g4_12	8178899	8178914	CTCF_MA0531.1	6.18725	+	dd_Smes_g4_12	8177820	8179821	7.88296	1	MSTRG.20458	rest-2
34748	dd_Smes_g4_12	8178931	8178946	CTCF_MA0531.1	9.57712	-	dd_Smes_g4_12	8177820	8179821	7.83554	1	MSTRG.20458	rest-2
34764	dd_Smes_g4_125	1047312	1047327	CTCF_MA0531.1	10.9946	+	dd_Smes_g4_125	1046158	1050405	9.47797	1	MSTRG.20458	rest-2
34765	dd_Smes_g4_125	1047521	1047536	CTCF_MA0531.1	5.47881	+	dd_Smes_g4_125	1046158	1050405	11.4017	1	MSTRG.20458	rest-2
34766	dd_Smes_g4_125	1047579	1047594	CTCF_MA0531.1	6.1266	+	dd_Smes_g4_125	1046158	1050405	7.91606	1	MSTRG.20458	rest-2
34767	dd_Smes_g4_125	1047940	1047955	CTCF_MA0531.1	5.53209	-	dd_Smes_g4_125	1046158	1050405	9.74841	1	MSTRG.20458	rest-2
34777	dd_Smes_g4_125	1066996	1067011	CTCF_MA0531.1	5.56041	+	dd_Smes_g4_125	1065957	1069998	8.49874	1	MSTRG.20458	rest-2
34778	dd_Smes_g4_125	1067155	1067170	CTCF_MA0531.1	6.86778	+	dd_Smes_g4_125	1065957	1069998	9.51014	1	MSTRG.20458	rest-2
34782	dd_Smes_g4_125	1077642	1077657	CTCF_MA0531.1	6.26831	-	dd_Smes_g4_125	1075056	1079027	7.92884	1	MSTRG.20458	rest-2
34783	dd_Smes_g4_125	1078971	1078986	CTCF_MA0531.1	5.3827	+	dd_Smes_g4_125	1075056	1079027	8.11639	1	MSTRG.20458	rest-2
34785	dd_Smes_g4_127	694673	694688	CTCF_MA0531.1	7.3064	-	dd_Smes_g4_127	694089	696090	8.64719	1	MSTRG.20458	rest-2
34786	dd_Smes_g4_127	694757	694772	CTCF_MA0531.1	5.90114	+	dd_Smes_g4_127	694089	696090	7.88211	1	MSTRG.20458	rest-2
34793	dd_Smes_g4_127	1868295	1868310	CTCF_MA0531.1	6.25752	-	dd_Smes_g4_127	1867600	1869601	8.14669	1	MSTRG.20458	rest-2
34819	dd_Smes_g4_129	341202	341217	CTCF_MA0531.1	5.66231	+	dd_Smes_g4_129	339375	341376	7.85108	1	MSTRG.20458	rest-2
34825	dd_Smes_g4_129	928087	928102	CTCF_MA0531.1	6.91603	-	dd_Smes_g4_129	927533	929534	7.84004	1	MSTRG.20458	rest-2
34855	dd_Smes_g4_13	7393300	7393315	CTCF_MA0531.1	5.45549	+	dd_Smes_g4_13	7392259	7394775	8.40167	1	MSTRG.20458	rest-2
34856	dd_Smes_g4_13	7394007	7394022	CTCF_MA0531.1	5.96511	+	dd_Smes_g4_13	7392259	7394775	7.39574	1	MSTRG.20458	rest-2
34858	dd_Smes_g4_13	7684202	7684217	CTCF_MA0531.1	6.46572	+	dd_Smes_g4_13	7683214	7685215	8.11559	1	MSTRG.20458	rest-2
34866	dd_Smes_g4_13	7892518	7892533	CTCF_MA0531.1	8.78869	+	dd_Smes_g4_13	7891231	7893311	7.51238	1	MSTRG.20458	rest-2
34917	dd_Smes_g4_131	1686282	1686297	CTCF_MA0531.1	5.36568	+	dd_Smes_g4_131	1684914	1687289	7.95094	1	MSTRG.20458	rest-2
34922	dd_Smes_g4_132	1181406	1181421	CTCF_MA0531.1	6.06098	+	dd_Smes_g4_132	1177367	1182100	7.71597	1	MSTRG.20458	rest-2
34941	dd_Smes_g4_133	1426903	1426918	CTCF_MA0531.1	12.0913	+	dd_Smes_g4_133	1426901	1428902	7.43244	1	MSTRG.20458	rest-2
34943	dd_Smes_g4_133	1427723	1427738	CTCF_MA0531.1	5.40553	+	dd_Smes_g4_133	1426901	1428902	7.88181	1	MSTRG.20458	rest-2
34979	dd_Smes_g4_134	755419	755434	CTCF_MA0531.1	6.04516	-	dd_Smes_g4_134	754506	756507	7.61433	1	MSTRG.20458	rest-2
34999	dd_Smes_g4_134	953843	953858	CTCF_MA0531.1	7.01206	-	dd_Smes_g4_134	952846	954847	7.84271	1	MSTRG.20458	rest-2
35000	dd_Smes_g4_134	954162	954177	CTCF_MA0531.1	8.1263	+	dd_Smes_g4_134	952846	954847	7.45612	1	MSTRG.20458	rest-2
35002	dd_Smes_g4_134	1056173	1056188	CTCF_MA0531.1	5.43495	+	dd_Smes_g4_134	1055204	1057665	8.1185	1	MSTRG.20458	rest-2
35003	dd_Smes_g4_134	1056209	1056224	CTCF_MA0531.1	6.69683	-	dd_Smes_g4_134	1055204	1057665	7.37681	1	MSTRG.20458	rest-2
35004	dd_Smes_g4_134	1056600	1056615	CTCF_MA0531.1	10.3021	-	dd_Smes_g4_134	1055204	1057665	7.7926	1	MSTRG.20458	rest-2
35011	dd_Smes_g4_134	1179404	1179419	CTCF_MA0531.1	6.36181	+	dd_Smes_g4_134	1176085	1180208	7.64406	1	MSTRG.20458	rest-2
35012	dd_Smes_g4_134	1179429	1179444	CTCF_MA0531.1	9.64535	+	dd_Smes_g4_134	1176085	1180208	7.56323	1	MSTRG.20458	rest-2
35013	dd_Smes_g4_134	1183957	1183972	CTCF_MA0531.1	9.45564	-	dd_Smes_g4_134	1182978	1184979	8.89095	1	MSTRG.20458	rest-2
35020	dd_Smes_g4_134	1378388	1378403	CTCF_MA0531.1	10.2378	-	dd_Smes_g4_134	1377261	1380860	8.49117	1	MSTRG.20458	rest-2
35027	dd_Smes_g4_134	1416826	1416841	CTCF_MA0531.1	14.2558	+	dd_Smes_g4_134	1415842	1418595	8.20358	1	MSTRG.20458	rest-2
35028	dd_Smes_g4_134	1416883	1416898	CTCF_MA0531.1	8.15151	+	dd_Smes_g4_134	1415842	1418595	8.44626	1	MSTRG.20458	rest-2
35029	dd_Smes_g4_134	1417031	1417046	CTCF_MA0531.1	5.55009	-	dd_Smes_g4_134	1415842	1418595	7.45052	1	MSTRG.20458	rest-2
35030	dd_Smes_g4_134	1417277	1417292	CTCF_MA0531.1	6.45916	-	dd_Smes_g4_134	1415842	1418595	8.90811	1	MSTRG.20458	rest-2
35032	dd_Smes_g4_134	1417521	1417536	CTCF_MA0531.1	7.43885	-	dd_Smes_g4_134	1415842	1418595	7.82715	1	MSTRG.20458	rest-2
35034	dd_Smes_g4_134	1417858	1417873	CTCF_MA0531.1	6.92416	-	dd_Smes_g4_134	1415842	1418595	9.08262	1	MSTRG.20458	rest-2
35037	dd_Smes_g4_134	1431699	1431714	CTCF_MA0531.1	8.82248	+	dd_Smes_g4_134	1431526	1433527	7.83615	1	MSTRG.20458	rest-2
35043	dd_Smes_g4_134	1643584	1643599	CTCF_MA0531.1	7.01452	+	dd_Smes_g4_134	1641685	1643747	8.09441	1	MSTRG.20458	rest-2
35059	dd_Smes_g4_138	154565	154580	CTCF_MA0531.1	5.5847	-	dd_Smes_g4_138	153494	155495	7.92551	1	MSTRG.20458	rest-2
35070	dd_Smes_g4_138	1326910	1326925	CTCF_MA0531.1	8.39784	+	dd_Smes_g4_138	1325790	1327791	7.76225	1	MSTRG.20458	rest-2
35090	dd_Smes_g4_14	3015108	3015123	CTCF_MA0531.1	5.6009	+	dd_Smes_g4_14	3014244	3016737	7.47123	1	MSTRG.20458	rest-2
35094	dd_Smes_g4_14	3147678	3147693	CTCF_MA0531.1	6.66061	+	dd_Smes_g4_14	3144647	3149033	7.93681	1	MSTRG.20458	rest-2
35096	dd_Smes_g4_14	3585636	3585651	CTCF_MA0531.1	7.08939	-	dd_Smes_g4_14	3585251	3587252	8.46108	1	MSTRG.20458	rest-2
35097	dd_Smes_g4_14	3585878	3585893	CTCF_MA0531.1	7.71295	+	dd_Smes_g4_14	3585251	3587252	7.54684	1	MSTRG.20458	rest-2
35126	dd_Smes_g4_14	5794308	5794323	CTCF_MA0531.1	7.56698	+	dd_Smes_g4_14	5791752	5795187	7.89537	1	MSTRG.20458	rest-2
35132	dd_Smes_g4_14	5938484	5938499	CTCF_MA0531.1	5.61138	-	dd_Smes_g4_14	5937151	5939152	10.9056	1	MSTRG.20458	rest-2
35181	dd_Smes_g4_144	787995	788010	CTCF_MA0531.1	8.94336	+	dd_Smes_g4_144	787981	789982	7.68836	1	MSTRG.20458	rest-2
35190	dd_Smes_g4_145	647005	647020	CTCF_MA0531.1	7.01753	-	dd_Smes_g4_145	646535	648536	7.45577	1	MSTRG.20458	rest-2
35272	dd_Smes_g4_15	3943169	3943184	CTCF_MA0531.1	6.27624	-	dd_Smes_g4_15	3941291	3943292	7.82772	1	MSTRG.20458	rest-2
35284	dd_Smes_g4_15	4620690	4620705	CTCF_MA0531.1	6.61531	+	dd_Smes_g4_15	4620195	4622196	7.88986	1	MSTRG.20458	rest-2
35289	dd_Smes_g4_15	5275653	5275668	CTCF_MA0531.1	5.93236	+	dd_Smes_g4_15	5274637	5276638	8.01356	1	MSTRG.20458	rest-2
35290	dd_Smes_g4_15	5347096	5347111	CTCF_MA0531.1	7.74709	+	dd_Smes_g4_15	5345975	5349549	9.28197	1	MSTRG.20458	rest-2
35293	dd_Smes_g4_15	5518183	5518198	CTCF_MA0531.1	9.07567	+	dd_Smes_g4_15	5517550	5519551	9.97309	1	MSTRG.20458	rest-2
35346	dd_Smes_g4_15	7103426	7103441	CTCF_MA0531.1	6.25297	+	dd_Smes_g4_15	7101015	7105970	7.60698	1	MSTRG.20458	rest-2
35349	dd_Smes_g4_15	7103969	7103984	CTCF_MA0531.1	6.52295	-	dd_Smes_g4_15	7101015	7105970	8.19645	1	MSTRG.20458	rest-2
35357	dd_Smes_g4_15	7174923	7174938	CTCF_MA0531.1	5.83572	+	dd_Smes_g4_15	7174007	7176205	7.85576	1	MSTRG.20458	rest-2
35364	dd_Smes_g4_15	7337488	7337503	CTCF_MA0531.1	5.58623	-	dd_Smes_g4_15	7334382	7339739	7.6308	1	MSTRG.20458	rest-2
35367	dd_Smes_g4_15	7392300	7392315	CTCF_MA0531.1	9.76271	+	dd_Smes_g4_15	7391276	7393277	7.40462	1	MSTRG.20458	rest-2
35368	dd_Smes_g4_15	7406742	7406757	CTCF_MA0531.1	5.66278	-	dd_Smes_g4_15	7405851	7407861	8.35615	1	MSTRG.20458	rest-2
35375	dd_Smes_g4_15	7549614	7549629	CTCF_MA0531.1	8.67979	-	dd_Smes_g4_15	7548811	7550812	8.47436	1	MSTRG.20458	rest-2
35384	dd_Smes_g4_15	7630135	7630150	CTCF_MA0531.1	5.90588	-	dd_Smes_g4_15	7628502	7630503	7.65849	1	MSTRG.20458	rest-2
35387	dd_Smes_g4_15	7698365	7698380	CTCF_MA0531.1	6.81693	+	dd_Smes_g4_15	7696779	7698780	11.4782	1	MSTRG.20458	rest-2
35388	dd_Smes_g4_15	7698764	7698779	CTCF_MA0531.1	7.32259	-	dd_Smes_g4_15	7696779	7698780	14.1481	1	MSTRG.20458	rest-2
35394	dd_Smes_g4_15	7792349	7792364	CTCF_MA0531.1	6.10352	+	dd_Smes_g4_15	7791332	7793333	7.70654	1	MSTRG.20458	rest-2
35395	dd_Smes_g4_15	7792467	7792482	CTCF_MA0531.1	6.50909	+	dd_Smes_g4_15	7791332	7793333	7.98379	1	MSTRG.20458	rest-2
35396	dd_Smes_g4_15	7792497	7792512	CTCF_MA0531.1	6.92843	-	dd_Smes_g4_15	7791332	7793333	7.5243	1	MSTRG.20458	rest-2
35447	dd_Smes_g4_157	662688	662703	CTCF_MA0531.1	7.19156	+	dd_Smes_g4_157	661676	663677	7.48478	1	MSTRG.20458	rest-2
35449	dd_Smes_g4_157	697543	697558	CTCF_MA0531.1	6.86028	+	dd_Smes_g4_157	696585	698586	8.27011	1	MSTRG.20458	rest-2
35462	dd_Smes_g4_157	1034545	1034560	CTCF_MA0531.1	10.0623	-	dd_Smes_g4_157	1034475	1036476	7.40232	1	MSTRG.20458	rest-2
35464	dd_Smes_g4_157	1035388	1035403	CTCF_MA0531.1	6.54614	-	dd_Smes_g4_157	1034475	1036476	14.2351	1	MSTRG.20458	rest-2
35465	dd_Smes_g4_157	1035623	1035638	CTCF_MA0531.1	9.00531	-	dd_Smes_g4_157	1034475	1036476	12.354	1	MSTRG.20458	rest-2
35495	dd_Smes_g4_16	948532	948547	CTCF_MA0531.1	5.73629	+	dd_Smes_g4_16	947212	949213	7.72903	1	MSTRG.20458	rest-2
35504	dd_Smes_g4_16	1316963	1316978	CTCF_MA0531.1	7.38608	-	dd_Smes_g4_16	1316032	1318033	7.51017	1	MSTRG.20458	rest-2
35518	dd_Smes_g4_16	3345926	3345941	CTCF_MA0531.1	8.31924	-	dd_Smes_g4_16	3345672	3348469	7.55598	1	MSTRG.20458	rest-2
35530	dd_Smes_g4_16	4653308	4653323	CTCF_MA0531.1	6.28694	-	dd_Smes_g4_16	4652865	4654866	7.72634	1	MSTRG.20458	rest-2
35558	dd_Smes_g4_167	410854	410869	CTCF_MA0531.1	6.00876	-	dd_Smes_g4_167	410144	412145	8.21301	1	MSTRG.20458	rest-2
35565	dd_Smes_g4_17	1060053	1060068	CTCF_MA0531.1	6.1795	-	dd_Smes_g4_17	1058970	1060971	8.53053	1	MSTRG.20458	rest-2
35587	dd_Smes_g4_17	6246754	6246769	CTCF_MA0531.1	8.70407	-	dd_Smes_g4_17	6245176	6247624	7.52441	1	MSTRG.20458	rest-2
35609	dd_Smes_g4_172	267656	267671	CTCF_MA0531.1	7.84579	-	dd_Smes_g4_172	267287	270094	7.42921	1	MSTRG.20458	rest-2
35610	dd_Smes_g4_172	268246	268261	CTCF_MA0531.1	5.52161	+	dd_Smes_g4_172	267287	270094	8.41048	1	MSTRG.20458	rest-2
35611	dd_Smes_g4_172	268438	268453	CTCF_MA0531.1	11.6418	+	dd_Smes_g4_172	267287	270094	7.65209	1	MSTRG.20458	rest-2
35619	dd_Smes_g4_172	704121	704136	CTCF_MA0531.1	13.8562	-	dd_Smes_g4_172	703375	705376	7.53677	1	MSTRG.20458	rest-2
35620	dd_Smes_g4_172	704307	704322	CTCF_MA0531.1	6.95816	+	dd_Smes_g4_172	703375	705376	9.59505	1	MSTRG.20458	rest-2
35621	dd_Smes_g4_172	704402	704417	CTCF_MA0531.1	5.45475	+	dd_Smes_g4_172	703375	705376	8.60141	1	MSTRG.20458	rest-2
35641	dd_Smes_g4_172	855398	855413	CTCF_MA0531.1	6.32448	-	dd_Smes_g4_172	853656	857563	7.65138	1	MSTRG.20458	rest-2
35646	dd_Smes_g4_172	887091	887106	CTCF_MA0531.1	6.03695	+	dd_Smes_g4_172	878072	888187	7.95193	1	MSTRG.20458	rest-2
35664	dd_Smes_g4_172	974886	974901	CTCF_MA0531.1	6.89115	-	dd_Smes_g4_172	972613	976453	7.72101	1	MSTRG.20458	rest-2
35665	dd_Smes_g4_172	974938	974953	CTCF_MA0531.1	12.4086	-	dd_Smes_g4_172	972613	976453	8.33786	1	MSTRG.20458	rest-2
35666	dd_Smes_g4_172	974988	975003	CTCF_MA0531.1	6.16799	+	dd_Smes_g4_172	972613	976453	8.27823	1	MSTRG.20458	rest-2
35669	dd_Smes_g4_172	975140	975155	CTCF_MA0531.1	5.50807	-	dd_Smes_g4_172	972613	976453	8.06561	1	MSTRG.20458	rest-2
35670	dd_Smes_g4_172	975178	975193	CTCF_MA0531.1	7.81654	+	dd_Smes_g4_172	972613	976453	8.33155	1	MSTRG.20458	rest-2
35671	dd_Smes_g4_172	975258	975273	CTCF_MA0531.1	6.77763	-	dd_Smes_g4_172	972613	976453	7.67706	1	MSTRG.20458	rest-2
35676	dd_Smes_g4_172	978161	978176	CTCF_MA0531.1	11.09	+	dd_Smes_g4_172	976712	979136	8.27031	1	MSTRG.20458	rest-2
35751	dd_Smes_g4_18	4127847	4127862	CTCF_MA0531.1	6.00684	+	dd_Smes_g4_18	4126689	4128690	8.14343	1	MSTRG.20458	rest-2
35773	dd_Smes_g4_18	7125789	7125804	CTCF_MA0531.1	5.5953	+	dd_Smes_g4_18	7125523	7127979	8.25252	1	MSTRG.20458	rest-2
35779	dd_Smes_g4_18	7213262	7213277	CTCF_MA0531.1	5.51745	+	dd_Smes_g4_18	7211532	7215371	9.33718	1	MSTRG.20458	rest-2
35782	dd_Smes_g4_18	7447691	7447706	CTCF_MA0531.1	7.52645	+	dd_Smes_g4_18	7446761	7449474	7.78111	1	MSTRG.20458	rest-2
35823	dd_Smes_g4_189	699106	699121	CTCF_MA0531.1	8.1069	-	dd_Smes_g4_189	697910	707079	8.43469	1	MSTRG.20458	rest-2
35855	dd_Smes_g4_189	872207	872222	CTCF_MA0531.1	6.60787	-	dd_Smes_g4_189	871160	874452	7.85908	1	MSTRG.20458	rest-2
35863	dd_Smes_g4_19	1552143	1552158	CTCF_MA0531.1	6.27245	-	dd_Smes_g4_19	1550218	1554331	7.9132	1	MSTRG.20458	rest-2
35873	dd_Smes_g4_19	3810358	3810373	CTCF_MA0531.1	5.61923	-	dd_Smes_g4_19	3809359	3811360	7.38274	1	MSTRG.20458	rest-2
35879	dd_Smes_g4_19	4755189	4755204	CTCF_MA0531.1	7.77818	-	dd_Smes_g4_19	4753237	4755238	11.5194	1	MSTRG.20458	rest-2
35880	dd_Smes_g4_19	4755208	4755223	CTCF_MA0531.1	6.41147	+	dd_Smes_g4_19	4753237	4755238	8.61087	1	MSTRG.20458	rest-2
35891	dd_Smes_g4_190	653192	653207	CTCF_MA0531.1	5.68146	-	dd_Smes_g4_190	652122	654331	7.38217	1	MSTRG.20458	rest-2
35910	dd_Smes_g4_196	154201	154216	CTCF_MA0531.1	6.69034	-	dd_Smes_g4_196	150950	155352	7.7155	1	MSTRG.20458	rest-2
35944	dd_Smes_g4_2	7810763	7810778	CTCF_MA0531.1	5.8501	-	dd_Smes_g4_2	7809435	7811507	8.599	1	MSTRG.20458	rest-2
35967	dd_Smes_g4_2	12015369	12015384	CTCF_MA0531.1	11.6531	+	dd_Smes_g4_2	12014876	12016877	8.62527	1	MSTRG.20458	rest-2
35968	dd_Smes_g4_2	12015431	12015446	CTCF_MA0531.1	7.61926	-	dd_Smes_g4_2	12014876	12016877	7.44543	1	MSTRG.20458	rest-2
35978	dd_Smes_g4_2	14677751	14677766	CTCF_MA0531.1	5.5161	+	dd_Smes_g4_2	14675757	14679774	7.71385	1	MSTRG.20458	rest-2
36049	dd_Smes_g4_202	134211	134226	CTCF_MA0531.1	8.77336	+	dd_Smes_g4_202	133209	135815	7.5221	1	MSTRG.20458	rest-2
36066	dd_Smes_g4_207	252097	252112	CTCF_MA0531.1	8.14648	-	dd_Smes_g4_207	250704	252705	7.95601	1	MSTRG.20458	rest-2
36091	dd_Smes_g4_21	4604901	4604916	CTCF_MA0531.1	10.2102	+	dd_Smes_g4_21	4603645	4605646	8.42	1	MSTRG.20458	rest-2
36158	dd_Smes_g4_219	222132	222147	CTCF_MA0531.1	6.88705	-	dd_Smes_g4_219	220406	222407	9.69651	1	MSTRG.20458	rest-2
36159	dd_Smes_g4_219	288414	288429	CTCF_MA0531.1	6.04342	+	dd_Smes_g4_219	288222	290738	8.87004	1	MSTRG.20458	rest-2
36161	dd_Smes_g4_219	289374	289389	CTCF_MA0531.1	6.86337	-	dd_Smes_g4_219	288222	290738	7.96084	1	MSTRG.20458	rest-2
36172	dd_Smes_g4_219	491482	491497	CTCF_MA0531.1	8.80245	+	dd_Smes_g4_219	488630	492856	8.68712	1	MSTRG.20458	rest-2
36186	dd_Smes_g4_22	793788	793803	CTCF_MA0531.1	6.93533	+	dd_Smes_g4_22	793479	795480	7.86218	1	MSTRG.20458	rest-2
36207	dd_Smes_g4_220	345649	345664	CTCF_MA0531.1	6.58285	-	dd_Smes_g4_220	344497	346498	52.0948	1	MSTRG.20458	rest-2
36250	dd_Smes_g4_231	402338	402353	CTCF_MA0531.1	5.6411	+	dd_Smes_g4_231	401888	403889	8.67199	1	MSTRG.20458	rest-2
36251	dd_Smes_g4_231	402895	402910	CTCF_MA0531.1	12.5067	+	dd_Smes_g4_231	401888	403889	7.80238	1	MSTRG.20458	rest-2
36252	dd_Smes_g4_231	407922	407937	CTCF_MA0531.1	8.35771	+	dd_Smes_g4_231	406859	411405	8.78758	1	MSTRG.20458	rest-2
36254	dd_Smes_g4_231	408192	408207	CTCF_MA0531.1	7.77338	-	dd_Smes_g4_231	406859	411405	7.71898	1	MSTRG.20458	rest-2
36257	dd_Smes_g4_231	408926	408941	CTCF_MA0531.1	5.67439	-	dd_Smes_g4_231	406859	411405	8.76394	1	MSTRG.20458	rest-2
36260	dd_Smes_g4_231	411085	411100	CTCF_MA0531.1	6.36237	+	dd_Smes_g4_231	406859	411405	8.19076	1	MSTRG.20458	rest-2
36261	dd_Smes_g4_231	447783	447798	CTCF_MA0531.1	6.21995	-	dd_Smes_g4_231	447492	449493	11.1653	1	MSTRG.20458	rest-2
36262	dd_Smes_g4_231	447950	447965	CTCF_MA0531.1	6.36449	-	dd_Smes_g4_231	447492	449493	10.4337	1	MSTRG.20458	rest-2
36264	dd_Smes_g4_231	448485	448500	CTCF_MA0531.1	11.2896	-	dd_Smes_g4_231	447492	449493	8.25756	1	MSTRG.20458	rest-2
36265	dd_Smes_g4_231	448571	448586	CTCF_MA0531.1	5.67334	-	dd_Smes_g4_231	447492	449493	7.84908	1	MSTRG.20458	rest-2
36284	dd_Smes_g4_232	58593	58608	CTCF_MA0531.1	5.72091	-	dd_Smes_g4_232	57443	59918	7.81791	1	MSTRG.20458	rest-2
36285	dd_Smes_g4_232	58932	58947	CTCF_MA0531.1	7.84336	+	dd_Smes_g4_232	57443	59918	8.65967	1	MSTRG.20458	rest-2
36287	dd_Smes_g4_232	76618	76633	CTCF_MA0531.1	8.77735	-	dd_Smes_g4_232	75777	77778	7.37487	1	MSTRG.20458	rest-2
36288	dd_Smes_g4_232	76663	76678	CTCF_MA0531.1	8.67753	+	dd_Smes_g4_232	75777	77778	7.56939	1	MSTRG.20458	rest-2
36293	dd_Smes_g4_232	350803	350818	CTCF_MA0531.1	8.18028	-	dd_Smes_g4_232	348897	352802	8.43595	1	MSTRG.20458	rest-2
36304	dd_Smes_g4_232	410504	410519	CTCF_MA0531.1	9.79047	+	dd_Smes_g4_232	408917	411088	7.81994	1	MSTRG.20458	rest-2
36305	dd_Smes_g4_232	414865	414880	CTCF_MA0531.1	6.0905	+	dd_Smes_g4_232	414171	416521	9.45755	1	MSTRG.20458	rest-2
36306	dd_Smes_g4_232	415355	415370	CTCF_MA0531.1	7.69927	+	dd_Smes_g4_232	414171	416521	8.78304	1	MSTRG.20458	rest-2
36310	dd_Smes_g4_232	417846	417861	CTCF_MA0531.1	6.03409	-	dd_Smes_g4_232	417051	419052	8.28406	1	MSTRG.20458	rest-2
36311	dd_Smes_g4_232	418021	418036	CTCF_MA0531.1	6.28571	+	dd_Smes_g4_232	417051	419052	9.77678	1	MSTRG.20458	rest-2
36312	dd_Smes_g4_232	420546	420561	CTCF_MA0531.1	5.90236	+	dd_Smes_g4_232	419474	421475	10.1075	1	MSTRG.20458	rest-2
36321	dd_Smes_g4_232	497946	497961	CTCF_MA0531.1	7.00861	+	dd_Smes_g4_232	495426	499108	10.9758	1	MSTRG.20458	rest-2
36349	dd_Smes_g4_24	673963	673978	CTCF_MA0531.1	6.08146	-	dd_Smes_g4_24	672473	676048	8.40987	1	MSTRG.20458	rest-2
36361	dd_Smes_g4_24	2229406	2229421	CTCF_MA0531.1	8.06184	-	dd_Smes_g4_24	2228822	2230823	8.25908	1	MSTRG.20458	rest-2
36363	dd_Smes_g4_24	2356659	2356674	CTCF_MA0531.1	6.98453	-	dd_Smes_g4_24	2355479	2357480	8.42455	1	MSTRG.20458	rest-2
36365	dd_Smes_g4_24	3787641	3787656	CTCF_MA0531.1	5.631	-	dd_Smes_g4_24	3786661	3788662	8.63677	1	MSTRG.20458	rest-2
36450	dd_Smes_g4_265	37020	37035	CTCF_MA0531.1	5.59332	-	dd_Smes_g4_265	36093	43765	7.50835	1	MSTRG.20458	rest-2
36452	dd_Smes_g4_265	38551	38566	CTCF_MA0531.1	6.07982	-	dd_Smes_g4_265	36093	43765	8.6423	1	MSTRG.20458	rest-2
36454	dd_Smes_g4_265	51121	51136	CTCF_MA0531.1	6.02697	+	dd_Smes_g4_265	49999	53312	7.52817	1	MSTRG.20458	rest-2
36456	dd_Smes_g4_265	52150	52165	CTCF_MA0531.1	6.31549	+	dd_Smes_g4_265	49999	53312	7.64804	1	MSTRG.20458	rest-2
36458	dd_Smes_g4_265	52517	52532	CTCF_MA0531.1	8.34094	+	dd_Smes_g4_265	49999	53312	10.8851	1	MSTRG.20458	rest-2
36459	dd_Smes_g4_265	52580	52595	CTCF_MA0531.1	7.7341	-	dd_Smes_g4_265	49999	53312	8.27649	1	MSTRG.20458	rest-2
36497	dd_Smes_g4_265	253644	253659	CTCF_MA0531.1	7.61384	-	dd_Smes_g4_265	251808	253809	7.9624	1	MSTRG.20458	rest-2
36506	dd_Smes_g4_265	282518	282533	CTCF_MA0531.1	7.51262	-	dd_Smes_g4_265	282457	285094	7.7946	1	MSTRG.20458	rest-2
36507	dd_Smes_g4_265	282830	282845	CTCF_MA0531.1	5.66265	-	dd_Smes_g4_265	282457	285094	8.88432	1	MSTRG.20458	rest-2
36508	dd_Smes_g4_265	282898	282913	CTCF_MA0531.1	8.98816	+	dd_Smes_g4_265	282457	285094	10.5038	1	MSTRG.20458	rest-2
36516	dd_Smes_g4_265	312416	312431	CTCF_MA0531.1	5.48175	+	dd_Smes_g4_265	311281	313334	8.88976	1	MSTRG.20458	rest-2
36529	dd_Smes_g4_265	419582	419597	CTCF_MA0531.1	5.73781	+	dd_Smes_g4_265	417866	422224	7.61214	1	MSTRG.20458	rest-2
36537	dd_Smes_g4_265	497191	497206	CTCF_MA0531.1	6.3038	+	dd_Smes_g4_265	494677	498996	7.47578	1	MSTRG.20458	rest-2
36549	dd_Smes_g4_265	555566	555581	CTCF_MA0531.1	5.35943	+	dd_Smes_g4_265	552381	556144	8.80771	1	MSTRG.20458	rest-2
36587	dd_Smes_g4_271	75212	75227	CTCF_MA0531.1	6.21151	-	dd_Smes_g4_271	74745	76746	8.28627	1	MSTRG.20458	rest-2
36594	dd_Smes_g4_279	381577	381592	CTCF_MA0531.1	5.45224	-	dd_Smes_g4_279	380986	382987	7.5096	1	MSTRG.20458	rest-2
36609	dd_Smes_g4_286	127894	127909	CTCF_MA0531.1	6.67043	+	dd_Smes_g4_286	127580	129803	7.59731	1	MSTRG.20458	rest-2
36620	dd_Smes_g4_29	1147871	1147886	CTCF_MA0531.1	8.33016	-	dd_Smes_g4_29	1147773	1149774	10.7816	1	MSTRG.20458	rest-2
36641	dd_Smes_g4_290	145177	145192	CTCF_MA0531.1	5.39153	-	dd_Smes_g4_290	143432	145433	8.98084	1	MSTRG.20458	rest-2
36642	dd_Smes_g4_290	145213	145228	CTCF_MA0531.1	6.86409	+	dd_Smes_g4_290	143432	145433	9.7642	1	MSTRG.20458	rest-2
36644	dd_Smes_g4_290	305489	305504	CTCF_MA0531.1	9.02468	+	dd_Smes_g4_290	303900	305901	10.5593	1	MSTRG.20458	rest-2
36648	dd_Smes_g4_297	110042	110057	CTCF_MA0531.1	5.69637	+	dd_Smes_g4_297	108282	110401	7.48419	1	MSTRG.20458	rest-2
36652	dd_Smes_g4_297	127586	127601	CTCF_MA0531.1	7.5981	-	dd_Smes_g4_297	126643	134885	7.42521	1	MSTRG.20458	rest-2
36653	dd_Smes_g4_297	127669	127684	CTCF_MA0531.1	6.64471	-	dd_Smes_g4_297	126643	134885	7.43523	1	MSTRG.20458	rest-2
36657	dd_Smes_g4_297	128497	128512	CTCF_MA0531.1	7.71665	-	dd_Smes_g4_297	126643	134885	8.07947	1	MSTRG.20458	rest-2
36659	dd_Smes_g4_297	129247	129262	CTCF_MA0531.1	5.72621	-	dd_Smes_g4_297	126643	134885	12.0658	1	MSTRG.20458	rest-2
36660	dd_Smes_g4_297	129287	129302	CTCF_MA0531.1	8.61587	-	dd_Smes_g4_297	126643	134885	11.8842	1	MSTRG.20458	rest-2
36664	dd_Smes_g4_297	133394	133409	CTCF_MA0531.1	5.69777	+	dd_Smes_g4_297	126643	134885	8.61571	1	MSTRG.20458	rest-2
36677	dd_Smes_g4_298	95468	95483	CTCF_MA0531.1	7.44394	+	dd_Smes_g4_298	94854	96855	9.62547	1	MSTRG.20458	rest-2
36680	dd_Smes_g4_298	105440	105455	CTCF_MA0531.1	6.26844	+	dd_Smes_g4_298	105076	108302	8.0616	1	MSTRG.20458	rest-2
36687	dd_Smes_g4_298	126024	126039	CTCF_MA0531.1	5.96105	-	dd_Smes_g4_298	124604	126605	8.84365	1	MSTRG.20458	rest-2
36701	dd_Smes_g4_3	2512713	2512728	CTCF_MA0531.1	6.03963	+	dd_Smes_g4_3	2510835	2512836	9.14101	1	MSTRG.20458	rest-2
36708	dd_Smes_g4_3	3468119	3468134	CTCF_MA0531.1	5.73302	-	dd_Smes_g4_3	3465009	3468233	7.50832	1	MSTRG.20458	rest-2
36713	dd_Smes_g4_3	3521316	3521331	CTCF_MA0531.1	5.9634	+	dd_Smes_g4_3	3519590	3522037	9.58137	1	MSTRG.20458	rest-2
36751	dd_Smes_g4_30	2155299	2155314	CTCF_MA0531.1	14.8526	-	dd_Smes_g4_30	2154241	2156242	7.50751	1	MSTRG.20458	rest-2
36756	dd_Smes_g4_30	3015404	3015419	CTCF_MA0531.1	5.54227	+	dd_Smes_g4_30	3014058	3016998	7.65825	1	MSTRG.20458	rest-2
36763	dd_Smes_g4_30	3862580	3862595	CTCF_MA0531.1	10.9765	-	dd_Smes_g4_30	3861540	3864241	8.72845	1	MSTRG.20458	rest-2
36764	dd_Smes_g4_30	3862860	3862875	CTCF_MA0531.1	9.94156	+	dd_Smes_g4_30	3861540	3864241	7.36342	1	MSTRG.20458	rest-2
36765	dd_Smes_g4_30	3863131	3863146	CTCF_MA0531.1	5.88838	-	dd_Smes_g4_30	3861540	3864241	8.16438	1	MSTRG.20458	rest-2
36796	dd_Smes_g4_31	3228804	3228819	CTCF_MA0531.1	6.74656	-	dd_Smes_g4_31	3226172	3229889	7.44228	1	MSTRG.20458	rest-2
36804	dd_Smes_g4_31	3744506	3744521	CTCF_MA0531.1	5.44475	-	dd_Smes_g4_31	3742976	3747666	11.0277	1	MSTRG.20458	rest-2
36806	dd_Smes_g4_31	4349344	4349359	CTCF_MA0531.1	8.00651	-	dd_Smes_g4_31	4348690	4350796	8.02037	1	MSTRG.20458	rest-2
36807	dd_Smes_g4_31	4349657	4349672	CTCF_MA0531.1	6.36411	-	dd_Smes_g4_31	4348690	4350796	8.02972	1	MSTRG.20458	rest-2
36815	dd_Smes_g4_315	22397	22412	CTCF_MA0531.1	6.79298	+	dd_Smes_g4_315	21210	23211	36.6687	1	MSTRG.20458	rest-2
36870	dd_Smes_g4_35	1496417	1496432	CTCF_MA0531.1	5.33605	+	dd_Smes_g4_35	1495756	1497757	8.22805	1	MSTRG.20458	rest-2
36891	dd_Smes_g4_36	3011009	3011024	CTCF_MA0531.1	5.73459	-	dd_Smes_g4_36	3009766	3011767	8.15786	1	MSTRG.20458	rest-2
36914	dd_Smes_g4_37	587330	587345	CTCF_MA0531.1	8.60574	-	dd_Smes_g4_37	585958	587959	7.71165	1	MSTRG.20458	rest-2
36920	dd_Smes_g4_37	2183790	2183805	CTCF_MA0531.1	5.56939	-	dd_Smes_g4_37	2181046	2183923	8.55863	1	MSTRG.20458	rest-2
36950	dd_Smes_g4_37	3163477	3163492	CTCF_MA0531.1	6.38824	+	dd_Smes_g4_37	3161935	3163936	8.86168	1	MSTRG.20458	rest-2
36959	dd_Smes_g4_37	3603755	3603770	CTCF_MA0531.1	8.91268	+	dd_Smes_g4_37	3602214	3604481	8.19221	1	MSTRG.20458	rest-2
36964	dd_Smes_g4_37	3627201	3627216	CTCF_MA0531.1	11.0076	-	dd_Smes_g4_37	3625286	3627287	10.8533	1	MSTRG.20458	rest-2
36981	dd_Smes_g4_37	4767256	4767271	CTCF_MA0531.1	7.28282	+	dd_Smes_g4_37	4766656	4768657	8.00016	1	MSTRG.20458	rest-2
36982	dd_Smes_g4_37	4767782	4767797	CTCF_MA0531.1	8.10991	+	dd_Smes_g4_37	4766656	4768657	7.83784	1	MSTRG.20458	rest-2
36986	dd_Smes_g4_38	1286681	1286696	CTCF_MA0531.1	8.57912	-	dd_Smes_g4_38	1285696	1288186	7.45577	1	MSTRG.20458	rest-2
36998	dd_Smes_g4_38	4513551	4513566	CTCF_MA0531.1	9.19738	-	dd_Smes_g4_38	4512448	4515216	8.71724	1	MSTRG.20458	rest-2
37026	dd_Smes_g4_4	3252004	3252019	CTCF_MA0531.1	5.34586	-	dd_Smes_g4_4	3250822	3254258	9.46521	1	MSTRG.20458	rest-2
37051	dd_Smes_g4_4	5464147	5464162	CTCF_MA0531.1	12.284	+	dd_Smes_g4_4	5463455	5465456	8.95328	1	MSTRG.20458	rest-2
37053	dd_Smes_g4_4	6650581	6650596	CTCF_MA0531.1	6.7254	+	dd_Smes_g4_4	6648691	6650692	8.72345	1	MSTRG.20458	rest-2
37076	dd_Smes_g4_4	9686225	9686240	CTCF_MA0531.1	6.68253	-	dd_Smes_g4_4	9685045	9687046	9.92405	1	MSTRG.20458	rest-2
37099	dd_Smes_g4_4	13892384	13892399	CTCF_MA0531.1	6.95459	-	dd_Smes_g4_4	13891459	13893460	7.80589	1	MSTRG.20458	rest-2
37110	dd_Smes_g4_40	995399	995414	CTCF_MA0531.1	7.14949	-	dd_Smes_g4_40	994760	996761	7.48109	1	MSTRG.20458	rest-2
37131	dd_Smes_g4_40	3423420	3423435	CTCF_MA0531.1	6.73821	-	dd_Smes_g4_40	3419078	3425029	7.99359	1	MSTRG.20458	rest-2
37137	dd_Smes_g4_40	3437110	3437125	CTCF_MA0531.1	11.7158	+	dd_Smes_g4_40	3436840	3438841	7.71497	1	MSTRG.20458	rest-2
37165	dd_Smes_g4_428	29049	29064	CTCF_MA0531.1	9.36767	-	dd_Smes_g4_428	27933	29934	63.0324	1	MSTRG.20458	rest-2
37179	dd_Smes_g4_434	40462	40477	CTCF_MA0531.1	14.3309	+	dd_Smes_g4_434	39483	41484	7.44583	1	MSTRG.20458	rest-2
37181	dd_Smes_g4_44	96723	96738	CTCF_MA0531.1	6.15783	-	dd_Smes_g4_44	96532	98533	7.53491	1	MSTRG.20458	rest-2
37183	dd_Smes_g4_44	733981	733996	CTCF_MA0531.1	5.82405	+	dd_Smes_g4_44	733204	735205	8.11786	1	MSTRG.20458	rest-2
37184	dd_Smes_g4_44	1484544	1484559	CTCF_MA0531.1	5.37509	-	dd_Smes_g4_44	1483679	1485680	13.3785	1	MSTRG.20458	rest-2
37198	dd_Smes_g4_45	1265730	1265745	CTCF_MA0531.1	6.06075	-	dd_Smes_g4_45	1263365	1267424	11.3226	1	MSTRG.20458	rest-2
37208	dd_Smes_g4_45	3709870	3709885	CTCF_MA0531.1	6.7512	+	dd_Smes_g4_45	3708757	3710758	7.83251	1	MSTRG.20458	rest-2
37227	dd_Smes_g4_47	2376330	2376345	CTCF_MA0531.1	7.48371	+	dd_Smes_g4_47	2374451	2376452	10.8055	1	MSTRG.20458	rest-2
37231	dd_Smes_g4_47	2900112	2900127	CTCF_MA0531.1	9.7674	-	dd_Smes_g4_47	2899017	2901018	8.88203	1	MSTRG.20458	rest-2
37243	dd_Smes_g4_49	303374	303389	CTCF_MA0531.1	8.00641	-	dd_Smes_g4_49	302520	304521	8.355	1	MSTRG.20458	rest-2
37244	dd_Smes_g4_49	303389	303404	CTCF_MA0531.1	7.26046	-	dd_Smes_g4_49	302520	304521	7.70084	1	MSTRG.20458	rest-2
37245	dd_Smes_g4_49	303437	303452	CTCF_MA0531.1	7.26046	-	dd_Smes_g4_49	302520	304521	7.45638	1	MSTRG.20458	rest-2
37246	dd_Smes_g4_49	303524	303539	CTCF_MA0531.1	5.56201	-	dd_Smes_g4_49	302520	304521	8.12498	1	MSTRG.20458	rest-2
37247	dd_Smes_g4_49	303542	303557	CTCF_MA0531.1	9.72241	-	dd_Smes_g4_49	302520	304521	8.13387	1	MSTRG.20458	rest-2
37248	dd_Smes_g4_49	303572	303587	CTCF_MA0531.1	7.34858	-	dd_Smes_g4_49	302520	304521	8.13387	1	MSTRG.20458	rest-2
37249	dd_Smes_g4_49	303646	303661	CTCF_MA0531.1	6.66902	-	dd_Smes_g4_49	302520	304521	7.54441	1	MSTRG.20458	rest-2
37274	dd_Smes_g4_5	5402382	5402397	CTCF_MA0531.1	7.86341	-	dd_Smes_g4_5	5401078	5403079	7.50612	1	MSTRG.20458	rest-2
37292	dd_Smes_g4_5	9182850	9182865	CTCF_MA0531.1	6.21516	+	dd_Smes_g4_5	9179200	9183143	9.62809	1	MSTRG.20458	rest-2
37314	dd_Smes_g4_5	12584728	12584743	CTCF_MA0531.1	5.81005	+	dd_Smes_g4_5	12583395	12585396	7.72568	1	MSTRG.20458	rest-2
37321	dd_Smes_g4_50	1793351	1793366	CTCF_MA0531.1	5.60682	-	dd_Smes_g4_50	1792418	1794419	9.11696	1	MSTRG.20458	rest-2
37322	dd_Smes_g4_50	1827231	1827246	CTCF_MA0531.1	8.4268	+	dd_Smes_g4_50	1826178	1828801	7.69296	1	MSTRG.20458	rest-2
37349	dd_Smes_g4_51	3219566	3219581	CTCF_MA0531.1	6.17702	-	dd_Smes_g4_51	3218502	3220503	7.48679	1	MSTRG.20458	rest-2
37351	dd_Smes_g4_51	3237891	3237906	CTCF_MA0531.1	5.77507	-	dd_Smes_g4_51	3236834	3239556	7.73523	1	MSTRG.20458	rest-2
37393	dd_Smes_g4_53	3669243	3669258	CTCF_MA0531.1	7.02213	-	dd_Smes_g4_53	3661772	3670973	7.7719	1	MSTRG.20458	rest-2
37430	dd_Smes_g4_55	6017	6032	CTCF_MA0531.1	8.02507	+	dd_Smes_g4_55	5096	7097	38.3541	1	MSTRG.20458	rest-2
37431	dd_Smes_g4_55	6369	6384	CTCF_MA0531.1	8.02507	+	dd_Smes_g4_55	5096	7097	30.7471	1	MSTRG.20458	rest-2
37439	dd_Smes_g4_55	1014176	1014191	CTCF_MA0531.1	5.3768	+	dd_Smes_g4_55	1013199	1015236	7.85634	1	MSTRG.20458	rest-2
37445	dd_Smes_g4_55	1588930	1588945	CTCF_MA0531.1	9.20304	-	dd_Smes_g4_55	1587912	1589913	9.53356	1	MSTRG.20458	rest-2
37498	dd_Smes_g4_59	1827945	1827960	CTCF_MA0531.1	9.37736	+	dd_Smes_g4_59	1826861	1828862	7.73051	1	MSTRG.20458	rest-2
37501	dd_Smes_g4_59	1888120	1888135	CTCF_MA0531.1	5.79062	-	dd_Smes_g4_59	1887260	1889261	7.55655	1	MSTRG.20458	rest-2
37539	dd_Smes_g4_6	6444847	6444862	CTCF_MA0531.1	5.70331	+	dd_Smes_g4_6	6443444	6445445	8.08568	1	MSTRG.20458	rest-2
37564	dd_Smes_g4_60	520190	520205	CTCF_MA0531.1	8.45565	+	dd_Smes_g4_60	518700	520701	7.46862	1	MSTRG.20458	rest-2
37565	dd_Smes_g4_60	520384	520399	CTCF_MA0531.1	11.0836	+	dd_Smes_g4_60	518700	520701	8.43428	1	MSTRG.20458	rest-2
37581	dd_Smes_g4_60	3645292	3645307	CTCF_MA0531.1	10.108	+	dd_Smes_g4_60	3644359	3646360	8.18455	1	MSTRG.20458	rest-2
37616	dd_Smes_g4_63	2472953	2472968	CTCF_MA0531.1	7.79166	-	dd_Smes_g4_63	2471981	2473982	8.59047	1	MSTRG.20458	rest-2
37622	dd_Smes_g4_64	1533258	1533273	CTCF_MA0531.1	6.10977	-	dd_Smes_g4_64	1531804	1533805	7.80872	1	MSTRG.20458	rest-2
37624	dd_Smes_g4_64	1533646	1533661	CTCF_MA0531.1	5.70788	+	dd_Smes_g4_64	1531804	1533805	7.55981	1	MSTRG.20458	rest-2
37626	dd_Smes_g4_64	1654463	1654478	CTCF_MA0531.1	7.78447	+	dd_Smes_g4_64	1653321	1655528	8.72114	1	MSTRG.20458	rest-2
37635	dd_Smes_g4_64	1825279	1825294	CTCF_MA0531.1	6.38809	-	dd_Smes_g4_64	1824191	1826192	8.41739	1	MSTRG.20458	rest-2
37654	dd_Smes_g4_65	1108795	1108810	CTCF_MA0531.1	7.33168	-	dd_Smes_g4_65	1108542	1112101	8.09466	1	MSTRG.20458	rest-2
37730	dd_Smes_g4_7	2355043	2355058	CTCF_MA0531.1	10.0067	-	dd_Smes_g4_7	2354291	2356849	13.8494	1	MSTRG.20458	rest-2
37731	dd_Smes_g4_7	2355155	2355170	CTCF_MA0531.1	5.65042	+	dd_Smes_g4_7	2354291	2356849	37.2835	1	MSTRG.20458	rest-2
37732	dd_Smes_g4_7	2355340	2355355	CTCF_MA0531.1	9.15257	-	dd_Smes_g4_7	2354291	2356849	22.5592	1	MSTRG.20458	rest-2
37733	dd_Smes_g4_7	2355839	2355854	CTCF_MA0531.1	6.79298	-	dd_Smes_g4_7	2354291	2356849	200.114	1	MSTRG.20458	rest-2
37748	dd_Smes_g4_70	844308	844323	CTCF_MA0531.1	7.92262	+	dd_Smes_g4_70	844206	846207	8.34131	1	MSTRG.20458	rest-2
37751	dd_Smes_g4_70	1182468	1182483	CTCF_MA0531.1	8.66969	-	dd_Smes_g4_70	1181535	1183536	7.93217	1	MSTRG.20458	rest-2
37752	dd_Smes_g4_70	1182535	1182550	CTCF_MA0531.1	6.4441	+	dd_Smes_g4_70	1181535	1183536	11.5253	1	MSTRG.20458	rest-2
37755	dd_Smes_g4_70	1518406	1518421	CTCF_MA0531.1	9.68292	+	dd_Smes_g4_70	1516576	1518577	7.56962	1	MSTRG.20458	rest-2
37761	dd_Smes_g4_70	2783998	2784013	CTCF_MA0531.1	6.83715	+	dd_Smes_g4_70	2782978	2784979	7.87426	1	MSTRG.20458	rest-2
37782	dd_Smes_g4_73	895748	895763	CTCF_MA0531.1	8.22105	-	dd_Smes_g4_73	893613	896270	7.81465	1	MSTRG.20458	rest-2
37784	dd_Smes_g4_73	896184	896199	CTCF_MA0531.1	6.23376	+	dd_Smes_g4_73	893613	896270	8.11683	1	MSTRG.20458	rest-2
37789	dd_Smes_g4_73	939984	939999	CTCF_MA0531.1	7.50084	+	dd_Smes_g4_73	937628	941292	8.24408	1	MSTRG.20458	rest-2
37802	dd_Smes_g4_73	2248302	2248317	CTCF_MA0531.1	6.15881	-	dd_Smes_g4_73	2247363	2249415	8.054	1	MSTRG.20458	rest-2
37815	dd_Smes_g4_74	1897187	1897202	CTCF_MA0531.1	7.60773	-	dd_Smes_g4_74	1896342	1898343	8.08384	1	MSTRG.20458	rest-2
37817	dd_Smes_g4_74	2308520	2308535	CTCF_MA0531.1	7.03233	+	dd_Smes_g4_74	2305958	2311062	7.67441	1	MSTRG.20458	rest-2
37853	dd_Smes_g4_76	2504453	2504468	CTCF_MA0531.1	5.69936	-	dd_Smes_g4_76	2503447	2506090	7.46533	1	MSTRG.20458	rest-2
37856	dd_Smes_g4_76	2505289	2505304	CTCF_MA0531.1	6.71439	-	dd_Smes_g4_76	2503447	2506090	7.38045	1	MSTRG.20458	rest-2
37857	dd_Smes_g4_76	2505415	2505430	CTCF_MA0531.1	5.47593	-	dd_Smes_g4_76	2503447	2506090	7.45871	1	MSTRG.20458	rest-2
37863	dd_Smes_g4_76	2514251	2514266	CTCF_MA0531.1	8.84809	+	dd_Smes_g4_76	2514194	2518625	7.45549	1	MSTRG.20458	rest-2
37864	dd_Smes_g4_76	2514278	2514293	CTCF_MA0531.1	8.63701	+	dd_Smes_g4_76	2514194	2518625	7.45549	1	MSTRG.20458	rest-2
37870	dd_Smes_g4_76	2516246	2516261	CTCF_MA0531.1	6.50964	-	dd_Smes_g4_76	2514194	2518625	7.87768	1	MSTRG.20458	rest-2
37873	dd_Smes_g4_76	2516961	2516976	CTCF_MA0531.1	7.66046	+	dd_Smes_g4_76	2514194	2518625	8.25228	1	MSTRG.20458	rest-2
37875	dd_Smes_g4_76	2520851	2520866	CTCF_MA0531.1	5.39459	-	dd_Smes_g4_76	2518637	2521940	8.95451	1	MSTRG.20458	rest-2
37876	dd_Smes_g4_76	2521526	2521541	CTCF_MA0531.1	5.55728	+	dd_Smes_g4_76	2518637	2521940	8.04222	1	MSTRG.20458	rest-2
37881	dd_Smes_g4_76	2605311	2605326	CTCF_MA0531.1	8.01103	+	dd_Smes_g4_76	2604876	2609060	7.64742	1	MSTRG.20458	rest-2
37885	dd_Smes_g4_76	2617586	2617601	CTCF_MA0531.1	5.38325	+	dd_Smes_g4_76	2615494	2618812	10.6771	1	MSTRG.20458	rest-2
37886	dd_Smes_g4_76	2617629	2617644	CTCF_MA0531.1	6.69601	-	dd_Smes_g4_76	2615494	2618812	7.4087	1	MSTRG.20458	rest-2
37910	dd_Smes_g4_78	2186850	2186865	CTCF_MA0531.1	7.26232	-	dd_Smes_g4_78	2185783	2187784	8.71661	1	MSTRG.20458	rest-2
37911	dd_Smes_g4_78	2186886	2186901	CTCF_MA0531.1	7.46255	-	dd_Smes_g4_78	2185783	2187784	8.9428	1	MSTRG.20458	rest-2
37950	dd_Smes_g4_8	8539199	8539214	CTCF_MA0531.1	7.39395	-	dd_Smes_g4_8	8538460	8540461	8.40417	1	MSTRG.20458	rest-2
37954	dd_Smes_g4_8	8654204	8654219	CTCF_MA0531.1	7.10466	-	dd_Smes_g4_8	8653169	8655170	7.69154	1	MSTRG.20458	rest-2
37978	dd_Smes_g4_81	2593759	2593774	CTCF_MA0531.1	10.6225	+	dd_Smes_g4_81	2593387	2595427	10.2499	1	MSTRG.20458	rest-2
37979	dd_Smes_g4_81	2594440	2594455	CTCF_MA0531.1	6.29631	+	dd_Smes_g4_81	2593387	2595427	9.6394	1	MSTRG.20458	rest-2
37993	dd_Smes_g4_83	290042	290057	CTCF_MA0531.1	5.44417	+	dd_Smes_g4_83	289642	291643	7.94749	1	MSTRG.20458	rest-2
38005	dd_Smes_g4_83	2405831	2405846	CTCF_MA0531.1	7.02478	-	dd_Smes_g4_83	2401732	2407858	7.48767	1	MSTRG.20458	rest-2
38027	dd_Smes_g4_85	971018	971033	CTCF_MA0531.1	7.55071	+	dd_Smes_g4_85	969603	971604	7.44318	1	MSTRG.20458	rest-2
38082	dd_Smes_g4_89	322926	322941	CTCF_MA0531.1	5.40906	-	dd_Smes_g4_89	321722	323928	8.1276	1	MSTRG.20458	rest-2
38102	dd_Smes_g4_9	7885619	7885634	CTCF_MA0531.1	6.04911	-	dd_Smes_g4_9	7882760	7888223	7.92697	1	MSTRG.20458	rest-2
38158	dd_Smes_g4_93	474121	474136	CTCF_MA0531.1	5.90205	+	dd_Smes_g4_93	473321	475322	9.69469	1	MSTRG.20458	rest-2
38159	dd_Smes_g4_93	474242	474257	CTCF_MA0531.1	7.83669	+	dd_Smes_g4_93	473321	475322	11.1042	1	MSTRG.20458	rest-2
38160	dd_Smes_g4_93	500307	500322	CTCF_MA0531.1	6.75262	-	dd_Smes_g4_93	499177	501879	14.7829	1	MSTRG.20458	rest-2
38161	dd_Smes_g4_93	500510	500525	CTCF_MA0531.1	7.20242	-	dd_Smes_g4_93	499177	501879	9.94573	1	MSTRG.20458	rest-2
38162	dd_Smes_g4_93	500791	500806	CTCF_MA0531.1	5.84877	+	dd_Smes_g4_93	499177	501879	12.7536	1	MSTRG.20458	rest-2
38163	dd_Smes_g4_93	501711	501726	CTCF_MA0531.1	7.21146	+	dd_Smes_g4_93	499177	501879	11.9688	1	MSTRG.20458	rest-2
38174	dd_Smes_g4_94	1957208	1957223	CTCF_MA0531.1	5.50534	+	dd_Smes_g4_94	1956166	1958971	24.4139	1	MSTRG.20458	rest-2
38182	dd_Smes_g4_94	2259166	2259181	CTCF_MA0531.1	5.61038	+	dd_Smes_g4_94	2258119	2260219	15.1862	1	MSTRG.20458	rest-2
38188	dd_Smes_g4_94	2270799	2270814	CTCF_MA0531.1	7.37139	-	dd_Smes_g4_94	2268785	2271144	9.72535	1	MSTRG.20458	rest-2
38190	dd_Smes_g4_94	2315323	2315338	CTCF_MA0531.1	5.41819	-	dd_Smes_g4_94	2315153	2317154	8.32149	1	MSTRG.20458	rest-2
38191	dd_Smes_g4_94	2316203	2316218	CTCF_MA0531.1	5.47316	-	dd_Smes_g4_94	2315153	2317154	10.9069	1	MSTRG.20458	rest-2
38223	dd_Smes_g4_97	1390818	1390833	CTCF_MA0531.1	5.73649	+	dd_Smes_g4_97	1389285	1391286	11.5184	1	MSTRG.20458	rest-2
38232	dd_Smes_g4_97	2185033	2185048	CTCF_MA0531.1	7.63815	+	dd_Smes_g4_97	2181908	2185819	7.65844	1	MSTRG.20458	rest-2
38263	dd_Smes_g4_1	13784054	13784064	Cf2_MA0015.1	7.61347	+	dd_Smes_g4_1	13782845	13784846	9.51902	1	MSTRG.22126:SMESG000049970.1:SMESG000031904.1:MSTRG.221	zfp560-1:zscan2-5:zscan2-8:zf-6
38269	dd_Smes_g4_1	15276590	15276600	Cf2_MA0015.1	7.4604	-	dd_Smes_g4_1	15275249	15278606	10.4894	1	MSTRG.22126:SMESG000049970.1:SMESG000031904.1:MSTRG.221	zfp560-1:zscan2-5:zscan2-8:zf-6
38280	dd_Smes_g4_10	3218447	3218457	Cf2_MA0015.1	8.05825	-	dd_Smes_g4_10	3216473	3219448	7.41872	1	MSTRG.22126:SMESG000049970.1:SMESG000031904.1:MSTRG.221	zfp560-1:zscan2-5:zscan2-8:zf-6
38294	dd_Smes_g4_101	1647974	1647984	Cf2_MA0015.1	8.39663	+	dd_Smes_g4_101	1647170	1649171	7.94522	1	MSTRG.22126:SMESG000049970.1:SMESG000031904.1:MSTRG.221	zfp560-1:zscan2-5:zscan2-8:zf-6
38311	dd_Smes_g4_108	1684834	1684844	Cf2_MA0015.1	7.65695	+	dd_Smes_g4_108	1683031	1685032	7.8865	1	MSTRG.22126:SMESG000049970.1:SMESG000031904.1:MSTRG.221	zfp560-1:zscan2-5:zscan2-8:zf-6
38391	dd_Smes_g4_13	5193209	5193219	Cf2_MA0015.1	7.55826	+	dd_Smes_g4_13	5192196	5194197	7.80432	1	MSTRG.22126:SMESG000049970.1:SMESG000031904.1:MSTRG.221	zfp560-1:zscan2-5:zscan2-8:zf-6
38401	dd_Smes_g4_131	1406027	1406037	Cf2_MA0015.1	7.55826	+	dd_Smes_g4_131	1404613	1406980	11.374	1	MSTRG.22126:SMESG000049970.1:SMESG000031904.1:MSTRG.221	zfp560-1:zscan2-5:zscan2-8:zf-6
38405	dd_Smes_g4_132	579727	579737	Cf2_MA0015.1	7.55573	+	dd_Smes_g4_132	579357	581449	10.208	1	MSTRG.22126:SMESG000049970.1:SMESG000031904.1:MSTRG.221	zfp560-1:zscan2-5:zscan2-8:zf-6
38420	dd_Smes_g4_135	1503326	1503336	Cf2_MA0015.1	8.3384	-	dd_Smes_g4_135	1501449	1504094	8.99798	1	MSTRG.22126:SMESG000049970.1:SMESG000031904.1:MSTRG.221	zfp560-1:zscan2-5:zscan2-8:zf-6
38431	dd_Smes_g4_14	5792511	5792521	Cf2_MA0015.1	8.83839	-	dd_Smes_g4_14	5791752	5795187	7.49575	1	MSTRG.22126:SMESG000049970.1:SMESG000031904.1:MSTRG.221	zfp560-1:zscan2-5:zscan2-8:zf-6
38458	dd_Smes_g4_15	3900141	3900151	Cf2_MA0015.1	8.3384	-	dd_Smes_g4_15	3898291	3900292	7.90441	1	MSTRG.22126:SMESG000049970.1:SMESG000031904.1:MSTRG.221	zfp560-1:zscan2-5:zscan2-8:zf-6
38461	dd_Smes_g4_15	3967623	3967633	Cf2_MA0015.1	8.3384	+	dd_Smes_g4_15	3967050	3969051	8.01885	1	MSTRG.22126:SMESG000049970.1:SMESG000031904.1:MSTRG.221	zfp560-1:zscan2-5:zscan2-8:zf-6
38488	dd_Smes_g4_157	892654	892664	Cf2_MA0015.1	8.11599	-	dd_Smes_g4_157	890517	893056	9.11242	1	MSTRG.22126:SMESG000049970.1:SMESG000031904.1:MSTRG.221	zfp560-1:zscan2-5:zscan2-8:zf-6
38507	dd_Smes_g4_167	161902	161912	Cf2_MA0015.1	8.37595	-	dd_Smes_g4_167	160212	162709	7.36391	1	MSTRG.22126:SMESG000049970.1:SMESG000031904.1:MSTRG.221	zfp560-1:zscan2-5:zscan2-8:zf-6
38543	dd_Smes_g4_18	7214300	7214310	Cf2_MA0015.1	7.71469	-	dd_Smes_g4_18	7211532	7215371	8.8833	1	MSTRG.22126:SMESG000049970.1:SMESG000031904.1:MSTRG.221	zfp560-1:zscan2-5:zscan2-8:zf-6
38547	dd_Smes_g4_183	1002740	1002750	Cf2_MA0015.1	7.57097	-	dd_Smes_g4_183	1001042	1003043	7.45911	1	MSTRG.22126:SMESG000049970.1:SMESG000031904.1:MSTRG.221	zfp560-1:zscan2-5:zscan2-8:zf-6
38557	dd_Smes_g4_189	365202	365212	Cf2_MA0015.1	7.45929	-	dd_Smes_g4_189	362686	365596	7.44216	1	MSTRG.22126:SMESG000049970.1:SMESG000031904.1:MSTRG.221	zfp560-1:zscan2-5:zscan2-8:zf-6
38571	dd_Smes_g4_192	271622	271632	Cf2_MA0015.1	7.61347	-	dd_Smes_g4_192	271026	273216	8.95843	1	MSTRG.22126:SMESG000049970.1:SMESG000031904.1:MSTRG.221	zfp560-1:zscan2-5:zscan2-8:zf-6
38642	dd_Smes_g4_232	421385	421395	Cf2_MA0015.1	7.75579	+	dd_Smes_g4_232	419474	421475	7.62583	1	MSTRG.22126:SMESG000049970.1:SMESG000031904.1:MSTRG.221	zfp560-1:zscan2-5:zscan2-8:zf-6
38647	dd_Smes_g4_24	672953	672963	Cf2_MA0015.1	8.39614	-	dd_Smes_g4_24	672473	676048	7.58306	1	MSTRG.22126:SMESG000049970.1:SMESG000031904.1:MSTRG.221	zfp560-1:zscan2-5:zscan2-8:zf-6
38649	dd_Smes_g4_24	6008595	6008605	Cf2_MA0015.1	7.61347	-	dd_Smes_g4_24	6008240	6010241	7.64883	1	MSTRG.22126:SMESG000049970.1:SMESG000031904.1:MSTRG.221	zfp560-1:zscan2-5:zscan2-8:zf-6
38671	dd_Smes_g4_262	103572	103582	Cf2_MA0015.1	8.05825	+	dd_Smes_g4_262	101672	104853	7.62376	1	MSTRG.22126:SMESG000049970.1:SMESG000031904.1:MSTRG.221	zfp560-1:zscan2-5:zscan2-8:zf-6
38674	dd_Smes_g4_265	238522	238532	Cf2_MA0015.1	7.69805	-	dd_Smes_g4_265	238492	240493	8.90956	1	MSTRG.22126:SMESG000049970.1:SMESG000031904.1:MSTRG.221	zfp560-1:zscan2-5:zscan2-8:zf-6
38703	dd_Smes_g4_297	327484	327494	Cf2_MA0015.1	7.61347	-	dd_Smes_g4_297	326940	328941	7.68928	1	MSTRG.22126:SMESG000049970.1:SMESG000031904.1:MSTRG.221	zfp560-1:zscan2-5:zscan2-8:zf-6
38704	dd_Smes_g4_297	327617	327627	Cf2_MA0015.1	7.61347	-	dd_Smes_g4_297	326940	328941	15.257	1	MSTRG.22126:SMESG000049970.1:SMESG000031904.1:MSTRG.221	zfp560-1:zscan2-5:zscan2-8:zf-6
38721	dd_Smes_g4_30	2155374	2155384	Cf2_MA0015.1	8.05572	-	dd_Smes_g4_30	2154241	2156242	7.92503	1	MSTRG.22126:SMESG000049970.1:SMESG000031904.1:MSTRG.221	zfp560-1:zscan2-5:zscan2-8:zf-6
38751	dd_Smes_g4_37	3183277	3183287	Cf2_MA0015.1	8.3384	-	dd_Smes_g4_37	3179970	3184958	9.34905	1	MSTRG.22126:SMESG000049970.1:SMESG000031904.1:MSTRG.221	zfp560-1:zscan2-5:zscan2-8:zf-6
38757	dd_Smes_g4_38	4629177	4629187	Cf2_MA0015.1	7.61347	-	dd_Smes_g4_38	4626523	4633586	7.4035	1	MSTRG.22126:SMESG000049970.1:SMESG000031904.1:MSTRG.221	zfp560-1:zscan2-5:zscan2-8:zf-6
38765	dd_Smes_g4_4	4211606	4211616	Cf2_MA0015.1	8.39614	-	dd_Smes_g4_4	4210095	4212096	8.40533	1	MSTRG.22126:SMESG000049970.1:SMESG000031904.1:MSTRG.221	zfp560-1:zscan2-5:zscan2-8:zf-6
38767	dd_Smes_g4_4	4505168	4505178	Cf2_MA0015.1	8.3384	+	dd_Smes_g4_4	4503361	4506842	7.62502	1	MSTRG.22126:SMESG000049970.1:SMESG000031904.1:MSTRG.221	zfp560-1:zscan2-5:zscan2-8:zf-6
38791	dd_Smes_g4_47	2376795	2376805	Cf2_MA0015.1	8.35364	-	dd_Smes_g4_47	2376733	2378734	8.24327	1	MSTRG.22126:SMESG000049970.1:SMESG000031904.1:MSTRG.221	zfp560-1:zscan2-5:zscan2-8:zf-6
38812	dd_Smes_g4_51	1160217	1160227	Cf2_MA0015.1	8.33889	+	dd_Smes_g4_51	1158779	1160780	7.85939	1	MSTRG.22126:SMESG000049970.1:SMESG000031904.1:MSTRG.221	zfp560-1:zscan2-5:zscan2-8:zf-6
38838	dd_Smes_g4_55	2882424	2882434	Cf2_MA0015.1	7.616	-	dd_Smes_g4_55	2881205	2884252	9.7785	1	MSTRG.22126:SMESG000049970.1:SMESG000031904.1:MSTRG.221	zfp560-1:zscan2-5:zscan2-8:zf-6
38841	dd_Smes_g4_57	1759455	1759465	Cf2_MA0015.1	8.3384	-	dd_Smes_g4_57	1759172	1761173	12.9218	1	MSTRG.22126:SMESG000049970.1:SMESG000031904.1:MSTRG.221	zfp560-1:zscan2-5:zscan2-8:zf-6
38846	dd_Smes_g4_59	1380967	1380977	Cf2_MA0015.1	7.57081	+	dd_Smes_g4_59	1378073	1381410	7.56061	1	MSTRG.22126:SMESG000049970.1:SMESG000031904.1:MSTRG.221	zfp560-1:zscan2-5:zscan2-8:zf-6
38873	dd_Smes_g4_65	1111634	1111644	Cf2_MA0015.1	7.61347	-	dd_Smes_g4_65	1108542	1112101	7.3939	1	MSTRG.22126:SMESG000049970.1:SMESG000031904.1:MSTRG.221	zfp560-1:zscan2-5:zscan2-8:zf-6
38884	dd_Smes_g4_67	442058	442068	Cf2_MA0015.1	9.43625	-	dd_Smes_g4_67	440973	442974	7.90717	1	MSTRG.22126:SMESG000049970.1:SMESG000031904.1:MSTRG.221	zfp560-1:zscan2-5:zscan2-8:zf-6
38901	dd_Smes_g4_70	1050880	1050890	Cf2_MA0015.1	7.61347	-	dd_Smes_g4_70	1050342	1052343	13.4592	1	MSTRG.22126:SMESG000049970.1:SMESG000031904.1:MSTRG.221	zfp560-1:zscan2-5:zscan2-8:zf-6
38921	dd_Smes_g4_76	2616354	2616364	Cf2_MA0015.1	7.71469	-	dd_Smes_g4_76	2615494	2618812	9.5619	1	MSTRG.22126:SMESG000049970.1:SMESG000031904.1:MSTRG.221	zfp560-1:zscan2-5:zscan2-8:zf-6
38922	dd_Smes_g4_76	2617370	2617380	Cf2_MA0015.1	8.3384	+	dd_Smes_g4_76	2615494	2618812	8.95647	1	MSTRG.22126:SMESG000049970.1:SMESG000031904.1:MSTRG.221	zfp560-1:zscan2-5:zscan2-8:zf-6
38953	dd_Smes_g4_86	1882822	1882832	Cf2_MA0015.1	7.61347	-	dd_Smes_g4_86	1882409	1884410	11.009	1	MSTRG.22126:SMESG000049970.1:SMESG000031904.1:MSTRG.221	zfp560-1:zscan2-5:zscan2-8:zf-6
38980	dd_Smes_g4_93	474101	474111	Cf2_MA0015.1	7.61347	+	dd_Smes_g4_93	473321	475322	10.297	1	MSTRG.22126:SMESG000049970.1:SMESG000031904.1:MSTRG.221	zfp560-1:zscan2-5:zscan2-8:zf-6
38997	dd_Smes_g4_97	2392038	2392048	Cf2_MA0015.1	8.39614	+	dd_Smes_g4_97	2390922	2392923	7.7474	1	MSTRG.22126:SMESG000049970.1:SMESG000031904.1:MSTRG.221	zfp560-1:zscan2-5:zscan2-8:zf-6
39008	dd_Smes_g4_1	2159845	2159852	Dbx_MA0174.1	5.93567	+	dd_Smes_g4_1	2158892	2160893	7.70623	1	MSTRG.2221	dbx
39019	dd_Smes_g4_1	4012081	4012088	Dbx_MA0174.1	5.93567	+	dd_Smes_g4_1	4011925	4013926	7.38448	1	MSTRG.2221	dbx
39105	dd_Smes_g4_1	15284981	15284988	Dbx_MA0174.1	5.93567	+	dd_Smes_g4_1	15283336	15286676	9.75565	1	MSTRG.2221	dbx
39127	dd_Smes_g4_10	1870035	1870042	Dbx_MA0174.1	5.93567	-	dd_Smes_g4_10	1868923	1870924	8.44763	1	MSTRG.2221	dbx
39161	dd_Smes_g4_100	777485	777492	Dbx_MA0174.1	5.93567	-	dd_Smes_g4_100	776999	779000	10.9847	1	MSTRG.2221	dbx
39172	dd_Smes_g4_101	244731	244738	Dbx_MA0174.1	5.93567	+	dd_Smes_g4_101	243820	245821	8.81376	1	MSTRG.2221	dbx
39330	dd_Smes_g4_111	208504	208511	Dbx_MA0174.1	5.93567	+	dd_Smes_g4_111	208242	211063	9.93071	1	MSTRG.2221	dbx
39342	dd_Smes_g4_111	1048241	1048248	Dbx_MA0174.1	5.93567	-	dd_Smes_g4_111	1047311	1049312	7.91865	1	MSTRG.2221	dbx
39657	dd_Smes_g4_131	951270	951277	Dbx_MA0174.1	5.93567	+	dd_Smes_g4_131	951052	953668	7.80391	1	MSTRG.2221	dbx
39747	dd_Smes_g4_134	1377277	1377284	Dbx_MA0174.1	5.93567	-	dd_Smes_g4_134	1377261	1380860	8.70416	1	MSTRG.2221	dbx
39904	dd_Smes_g4_142	1073698	1073705	Dbx_MA0174.1	5.93567	-	dd_Smes_g4_142	1070038	1074447	7.48199	1	MSTRG.2221	dbx
40139	dd_Smes_g4_15	7529886	7529893	Dbx_MA0174.1	5.93567	-	dd_Smes_g4_15	7528944	7532541	7.57499	1	MSTRG.2221	dbx
40141	dd_Smes_g4_15	7698128	7698135	Dbx_MA0174.1	5.93567	-	dd_Smes_g4_15	7696779	7698780	12.835	1	MSTRG.2221	dbx
40148	dd_Smes_g4_150	355164	355171	Dbx_MA0174.1	5.93567	+	dd_Smes_g4_150	354226	356295	7.51069	1	MSTRG.2221	dbx
40373	dd_Smes_g4_17	6162835	6162842	Dbx_MA0174.1	5.93567	-	dd_Smes_g4_17	6161264	6163277	10.8155	1	MSTRG.2221	dbx
40390	dd_Smes_g4_172	267513	267520	Dbx_MA0174.1	5.93567	-	dd_Smes_g4_172	267287	270094	7.46539	1	MSTRG.2221	dbx
40415	dd_Smes_g4_172	1150619	1150626	Dbx_MA0174.1	5.93567	+	dd_Smes_g4_172	1145202	1151492	7.86595	1	MSTRG.2221	dbx
40468	dd_Smes_g4_179	687805	687812	Dbx_MA0174.1	5.93567	-	dd_Smes_g4_179	686948	688949	8.59306	1	MSTRG.2221	dbx
40593	dd_Smes_g4_186	206714	206721	Dbx_MA0174.1	5.93567	-	dd_Smes_g4_186	205483	209461	7.42184	1	MSTRG.2221	dbx
40611	dd_Smes_g4_186	923383	923390	Dbx_MA0174.1	5.93567	+	dd_Smes_g4_186	921000	925162	8.53752	1	MSTRG.2221	dbx
40638	dd_Smes_g4_189	703940	703947	Dbx_MA0174.1	5.93567	-	dd_Smes_g4_189	697910	707079	8.44538	1	MSTRG.2221	dbx
40824	dd_Smes_g4_2	12468630	12468637	Dbx_MA0174.1	5.93567	-	dd_Smes_g4_2	12467095	12469096	10.1174	1	MSTRG.2221	dbx
40825	dd_Smes_g4_2	12468670	12468677	Dbx_MA0174.1	5.93567	+	dd_Smes_g4_2	12467095	12469096	8.67367	1	MSTRG.2221	dbx
40826	dd_Smes_g4_2	12872747	12872754	Dbx_MA0174.1	5.93567	-	dd_Smes_g4_2	12871645	12873646	9.17148	1	MSTRG.2221	dbx
41190	dd_Smes_g4_232	594908	594915	Dbx_MA0174.1	5.93567	-	dd_Smes_g4_232	594545	596546	8.01883	1	MSTRG.2221	dbx
41220	dd_Smes_g4_24	707286	707293	Dbx_MA0174.1	5.93567	+	dd_Smes_g4_24	706504	708505	9.81011	1	MSTRG.2221	dbx
41230	dd_Smes_g4_24	2133590	2133597	Dbx_MA0174.1	5.93567	+	dd_Smes_g4_24	2132331	2134332	9.14658	1	MSTRG.2221	dbx
41262	dd_Smes_g4_242	221855	221862	Dbx_MA0174.1	5.93567	+	dd_Smes_g4_242	220865	223245	8.04555	1	MSTRG.2221	dbx
41366	dd_Smes_g4_26	1027976	1027983	Dbx_MA0174.1	5.93567	-	dd_Smes_g4_26	1027188	1029189	7.42192	1	MSTRG.2221	dbx
41408	dd_Smes_g4_265	253606	253613	Dbx_MA0174.1	5.93567	-	dd_Smes_g4_265	251808	253809	9.09298	1	MSTRG.2221	dbx
41411	dd_Smes_g4_265	315028	315035	Dbx_MA0174.1	5.93567	-	dd_Smes_g4_265	314128	316129	9.44996	1	MSTRG.2221	dbx
41420	dd_Smes_g4_265	528592	528599	Dbx_MA0174.1	5.93567	-	dd_Smes_g4_265	527663	529704	7.69599	1	MSTRG.2221	dbx
41430	dd_Smes_g4_268	126834	126841	Dbx_MA0174.1	5.93567	+	dd_Smes_g4_268	126820	128821	7.76167	1	MSTRG.2221	dbx
41507	dd_Smes_g4_29	1145720	1145727	Dbx_MA0174.1	5.93567	-	dd_Smes_g4_29	1144410	1146999	7.60272	1	MSTRG.2221	dbx
41549	dd_Smes_g4_297	75565	75572	Dbx_MA0174.1	5.93567	-	dd_Smes_g4_297	75458	77459	7.82145	1	MSTRG.2221	dbx
41558	dd_Smes_g4_3	25515	25522	Dbx_MA0174.1	5.93567	+	dd_Smes_g4_3	24655	26656	11.4454	1	MSTRG.2221	dbx
41703	dd_Smes_g4_31	4349372	4349379	Dbx_MA0174.1	5.93567	-	dd_Smes_g4_31	4348690	4350796	8.54539	1	MSTRG.2221	dbx
41735	dd_Smes_g4_32	2685483	2685490	Dbx_MA0174.1	5.93567	+	dd_Smes_g4_32	2683831	2685832	7.77654	1	MSTRG.2221	dbx
41760	dd_Smes_g4_34	788229	788236	Dbx_MA0174.1	5.93567	-	dd_Smes_g4_34	787148	789149	7.89401	1	MSTRG.2221	dbx
41837	dd_Smes_g4_37	586719	586726	Dbx_MA0174.1	5.93567	-	dd_Smes_g4_37	585958	587959	8.64729	1	MSTRG.2221	dbx
41880	dd_Smes_g4_37	3183589	3183596	Dbx_MA0174.1	5.93567	+	dd_Smes_g4_37	3179970	3184958	7.36824	1	MSTRG.2221	dbx
41894	dd_Smes_g4_38	739442	739449	Dbx_MA0174.1	5.93567	-	dd_Smes_g4_38	739247	741248	8.31597	1	MSTRG.2221	dbx
41906	dd_Smes_g4_38	4513062	4513069	Dbx_MA0174.1	5.93567	+	dd_Smes_g4_38	4512448	4515216	9.06472	1	MSTRG.2221	dbx
41984	dd_Smes_g4_4	5463957	5463964	Dbx_MA0174.1	5.93567	+	dd_Smes_g4_4	5463455	5465456	9.09501	1	MSTRG.2221	dbx
42038	dd_Smes_g4_4	12537566	12537573	Dbx_MA0174.1	5.93567	-	dd_Smes_g4_4	12535631	12537632	7.72688	1	MSTRG.2221	dbx
42045	dd_Smes_g4_40	429401	429408	Dbx_MA0174.1	5.93567	-	dd_Smes_g4_40	427609	431566	8.12657	1	MSTRG.2221	dbx
42154	dd_Smes_g4_44	3732793	3732800	Dbx_MA0174.1	5.93567	-	dd_Smes_g4_44	3731912	3733913	9.04732	1	MSTRG.2221	dbx
42167	dd_Smes_g4_45	3679732	3679739	Dbx_MA0174.1	5.93567	-	dd_Smes_g4_45	3679657	3681658	8.67278	1	MSTRG.2221	dbx
42223	dd_Smes_g4_49	1106294	1106301	Dbx_MA0174.1	5.93567	-	dd_Smes_g4_49	1105752	1109015	7.8213	1	MSTRG.2221	dbx
42469	dd_Smes_g4_55	564126	564133	Dbx_MA0174.1	5.93567	-	dd_Smes_g4_55	562519	564520	9.74466	1	MSTRG.2221	dbx
42547	dd_Smes_g4_58	2706216	2706223	Dbx_MA0174.1	5.93567	+	dd_Smes_g4_58	2704596	2706793	7.40792	1	MSTRG.2221	dbx
42570	dd_Smes_g4_59	2739865	2739872	Dbx_MA0174.1	5.93567	-	dd_Smes_g4_59	2739371	2741372	7.78847	1	MSTRG.2221	dbx
42659	dd_Smes_g4_60	2567692	2567699	Dbx_MA0174.1	5.93567	+	dd_Smes_g4_60	2566517	2568518	8.39372	1	MSTRG.2221	dbx
42895	dd_Smes_g4_7	2356068	2356075	Dbx_MA0174.1	5.93567	-	dd_Smes_g4_7	2354291	2356849	23.3831	1	MSTRG.2221	dbx
42922	dd_Smes_g4_70	942226	942233	Dbx_MA0174.1	5.93567	-	dd_Smes_g4_70	941655	943703	7.51265	1	MSTRG.2221	dbx
42939	dd_Smes_g4_70	2318756	2318763	Dbx_MA0174.1	5.93567	-	dd_Smes_g4_70	2318038	2320365	7.96037	1	MSTRG.2221	dbx
42972	dd_Smes_g4_72	2390525	2390532	Dbx_MA0174.1	5.93567	+	dd_Smes_g4_72	2388898	2390899	8.19782	1	MSTRG.2221	dbx
43105	dd_Smes_g4_78	41538	41545	Dbx_MA0174.1	5.93567	-	dd_Smes_g4_78	40670	42671	12.5795	1	MSTRG.2221	dbx
43111	dd_Smes_g4_78	2574735	2574742	Dbx_MA0174.1	5.93567	-	dd_Smes_g4_78	2573713	2575714	9.33506	1	MSTRG.2221	dbx
43151	dd_Smes_g4_8	4795115	4795122	Dbx_MA0174.1	5.93567	+	dd_Smes_g4_8	4794413	4796414	8.20885	1	MSTRG.2221	dbx
43169	dd_Smes_g4_8	8653186	8653193	Dbx_MA0174.1	5.93567	-	dd_Smes_g4_8	8653169	8655170	10.1265	1	MSTRG.2221	dbx
43179	dd_Smes_g4_8	8691331	8691338	Dbx_MA0174.1	5.93567	+	dd_Smes_g4_8	8689734	8691735	9.21054	1	MSTRG.2221	dbx
43187	dd_Smes_g4_80	1622711	1622718	Dbx_MA0174.1	5.93567	-	dd_Smes_g4_80	1622380	1624381	8.41814	1	MSTRG.2221	dbx
43210	dd_Smes_g4_81	2593554	2593561	Dbx_MA0174.1	5.93567	+	dd_Smes_g4_81	2593387	2595427	16.2352	1	MSTRG.2221	dbx
43402	dd_Smes_g4_90	57085	57092	Dbx_MA0174.1	5.93567	+	dd_Smes_g4_90	55667	57668	7.42506	1	MSTRG.2221	dbx
43461	dd_Smes_g4_93	500287	500294	Dbx_MA0174.1	5.93567	+	dd_Smes_g4_93	499177	501879	15.2856	1	MSTRG.2221	dbx
43493	dd_Smes_g4_94	2270715	2270722	Dbx_MA0174.1	5.93567	-	dd_Smes_g4_94	2268785	2271144	10.9164	1	MSTRG.2221	dbx
43543	dd_Smes_g4_97	940228	940235	Dbx_MA0174.1	5.93567	-	dd_Smes_g4_97	939625	941626	8.01562	1	MSTRG.2221	dbx
43586	dd_Smes_g4_1	4704858	4704868	Dlx1_MA0879.1	6.56847	+	dd_Smes_g4_1	4703314	4708303	8.73489	1	MSTRG.14008	dll-1
43588	dd_Smes_g4_1	5109430	5109440	Dlx1_MA0879.1	6.52517	-	dd_Smes_g4_1	5109337	5111338	7.48039	1	MSTRG.14008	dll-1
43625	dd_Smes_g4_100	2217708	2217718	Dlx1_MA0879.1	6.55348	-	dd_Smes_g4_100	2215772	2217773	7.52498	1	MSTRG.14008	dll-1
43627	dd_Smes_g4_100	2225371	2225381	Dlx1_MA0879.1	7.23609	+	dd_Smes_g4_100	2224244	2226245	7.62249	1	MSTRG.14008	dll-1
43668	dd_Smes_g4_110	485307	485317	Dlx1_MA0879.1	7.78327	-	dd_Smes_g4_110	483532	485533	8.47154	1	MSTRG.14008	dll-1
43700	dd_Smes_g4_116	922369	922379	Dlx1_MA0879.1	6.66145	-	dd_Smes_g4_116	922356	924357	10.2816	1	MSTRG.14008	dll-1
43735	dd_Smes_g4_127	1868207	1868217	Dlx1_MA0879.1	7.47335	+	dd_Smes_g4_127	1867600	1869601	7.57383	1	MSTRG.14008	dll-1
43761	dd_Smes_g4_131	724553	724563	Dlx1_MA0879.1	6.42537	+	dd_Smes_g4_131	719448	725309	8.86243	1	MSTRG.14008	dll-1
43784	dd_Smes_g4_133	1556942	1556952	Dlx1_MA0879.1	6.51269	+	dd_Smes_g4_133	1555855	1557856	8.32191	1	MSTRG.14008	dll-1
43800	dd_Smes_g4_135	1503342	1503352	Dlx1_MA0879.1	6.68124	-	dd_Smes_g4_135	1501449	1504094	9.69159	1	MSTRG.14008	dll-1
43850	dd_Smes_g4_145	646994	647004	Dlx1_MA0879.1	6.47174	+	dd_Smes_g4_145	646535	648536	7.56894	1	MSTRG.14008	dll-1
43869	dd_Smes_g4_15	2850980	2850990	Dlx1_MA0879.1	6.57918	+	dd_Smes_g4_15	2850206	2852207	7.80771	1	MSTRG.14008	dll-1
43874	dd_Smes_g4_15	5820343	5820353	Dlx1_MA0879.1	7.6331	-	dd_Smes_g4_15	5819026	5821446	9.15335	1	MSTRG.14008	dll-1
43896	dd_Smes_g4_15	7792037	7792047	Dlx1_MA0879.1	7.513	+	dd_Smes_g4_15	7791332	7793333	9.48241	1	MSTRG.14008	dll-1
43903	dd_Smes_g4_157	312961	312971	Dlx1_MA0879.1	7.57258	-	dd_Smes_g4_157	311794	313965	9.99741	1	MSTRG.14008	dll-1
43947	dd_Smes_g4_17	1059927	1059937	Dlx1_MA0879.1	6.57321	+	dd_Smes_g4_17	1058970	1060971	7.84825	1	MSTRG.14008	dll-1
43948	dd_Smes_g4_17	1713774	1713784	Dlx1_MA0879.1	6.42702	-	dd_Smes_g4_17	1712587	1716231	7.714	1	MSTRG.14008	dll-1
44052	dd_Smes_g4_2	8521521	8521531	Dlx1_MA0879.1	7.513	+	dd_Smes_g4_2	8520781	8523966	8.30308	1	MSTRG.14008	dll-1
44106	dd_Smes_g4_216	154677	154687	Dlx1_MA0879.1	6.92616	-	dd_Smes_g4_216	152187	159458	7.85946	1	MSTRG.14008	dll-1
44113	dd_Smes_g4_218	498831	498841	Dlx1_MA0879.1	6.70375	-	dd_Smes_g4_218	498128	500129	7.48666	1	MSTRG.14008	dll-1
44115	dd_Smes_g4_219	288311	288321	Dlx1_MA0879.1	6.7351	+	dd_Smes_g4_219	288222	290738	8.43077	1	MSTRG.14008	dll-1
44147	dd_Smes_g4_232	354645	354655	Dlx1_MA0879.1	7.513	-	dd_Smes_g4_232	354125	356126	13.3189	1	MSTRG.14008	dll-1
44164	dd_Smes_g4_245	163954	163964	Dlx1_MA0879.1	8.22393	-	dd_Smes_g4_245	162341	164491	8.25332	1	MSTRG.14008	dll-1
44168	dd_Smes_g4_246	444170	444180	Dlx1_MA0879.1	7.13193	-	dd_Smes_g4_246	442812	444813	7.77781	1	MSTRG.14008	dll-1
44195	dd_Smes_g4_265	312490	312500	Dlx1_MA0879.1	7.1444	-	dd_Smes_g4_265	311281	313334	8.14803	1	MSTRG.14008	dll-1
44199	dd_Smes_g4_265	497431	497441	Dlx1_MA0879.1	6.93972	+	dd_Smes_g4_265	494677	498996	10.0591	1	MSTRG.14008	dll-1
44223	dd_Smes_g4_29	1796631	1796641	Dlx1_MA0879.1	6.53226	+	dd_Smes_g4_29	1794818	1796819	7.93355	1	MSTRG.14008	dll-1
44302	dd_Smes_g4_36	1487914	1487924	Dlx1_MA0879.1	7.07344	-	dd_Smes_g4_36	1487559	1489560	8.83822	1	MSTRG.14008	dll-1
44315	dd_Smes_g4_37	1670359	1670369	Dlx1_MA0879.1	6.57321	+	dd_Smes_g4_37	1668799	1671620	9.391	1	MSTRG.14008	dll-1
44317	dd_Smes_g4_37	2183757	2183767	Dlx1_MA0879.1	6.72148	+	dd_Smes_g4_37	2181046	2183923	8.55863	1	MSTRG.14008	dll-1
44325	dd_Smes_g4_37	4649090	4649100	Dlx1_MA0879.1	7.07235	-	dd_Smes_g4_37	4645956	4650730	8.00721	1	MSTRG.14008	dll-1
44333	dd_Smes_g4_38	4513323	4513333	Dlx1_MA0879.1	6.52517	-	dd_Smes_g4_38	4512448	4515216	7.96089	1	MSTRG.14008	dll-1
44335	dd_Smes_g4_38	4629061	4629071	Dlx1_MA0879.1	6.63279	-	dd_Smes_g4_38	4626523	4633586	7.43191	1	MSTRG.14008	dll-1
44346	dd_Smes_g4_4	4211716	4211726	Dlx1_MA0879.1	7.66427	+	dd_Smes_g4_4	4210095	4212096	7.45698	1	MSTRG.14008	dll-1
44399	dd_Smes_g4_44	3132310	3132320	Dlx1_MA0879.1	6.93972	+	dd_Smes_g4_44	3130747	3133648	8.61003	1	MSTRG.14008	dll-1
44408	dd_Smes_g4_47	2376231	2376241	Dlx1_MA0879.1	6.72447	+	dd_Smes_g4_47	2374451	2376452	9.59676	1	MSTRG.14008	dll-1
44422	dd_Smes_g4_49	1513182	1513192	Dlx1_MA0879.1	6.73695	+	dd_Smes_g4_49	1511584	1513585	8.41055	1	MSTRG.14008	dll-1
44431	dd_Smes_g4_5	9182601	9182611	Dlx1_MA0879.1	6.5017	-	dd_Smes_g4_5	9179200	9183143	7.42968	1	MSTRG.14008	dll-1
44434	dd_Smes_g4_5	9186958	9186968	Dlx1_MA0879.1	7.66427	+	dd_Smes_g4_5	9184801	9189613	7.45095	1	MSTRG.14008	dll-1
44552	dd_Smes_g4_68	421851	421861	Dlx1_MA0879.1	6.61039	-	dd_Smes_g4_68	421293	423466	7.72493	1	MSTRG.14008	dll-1
44565	dd_Smes_g4_70	1170667	1170677	Dlx1_MA0879.1	8.22393	+	dd_Smes_g4_70	1168980	1172645	7.97322	1	MSTRG.14008	dll-1
44567	dd_Smes_g4_70	1485120	1485130	Dlx1_MA0879.1	6.95334	+	dd_Smes_g4_70	1483936	1485937	10.5015	1	MSTRG.14008	dll-1
44590	dd_Smes_g4_74	2315925	2315935	Dlx1_MA0879.1	6.52517	-	dd_Smes_g4_74	2314738	2318799	7.52647	1	MSTRG.14008	dll-1
44604	dd_Smes_g4_76	2842830	2842840	Dlx1_MA0879.1	6.95334	+	dd_Smes_g4_76	2842544	2844545	8.6569	1	MSTRG.14008	dll-1
44685	dd_Smes_g4_93	500547	500557	Dlx1_MA0879.1	6.48551	+	dd_Smes_g4_93	499177	501879	8.70889	1	MSTRG.14008	dll-1
44689	dd_Smes_g4_94	1181802	1181812	Dlx1_MA0879.1	7.44602	-	dd_Smes_g4_94	1180962	1182989	8.08402	1	MSTRG.14008	dll-1
44695	dd_Smes_g4_94	2259342	2259352	Dlx1_MA0879.1	6.67087	+	dd_Smes_g4_94	2258119	2260219	7.8036	1	MSTRG.14008	dll-1
44705	dd_Smes_g4_97	742075	742085	Dlx1_MA0879.1	6.67087	+	dd_Smes_g4_97	740646	742647	8.44526	1	MSTRG.14008	dll-1
44738	dd_Smes_g4_1	8172853	8172867	EBF1_MA0154.3	5.84257	+	dd_Smes_g4_1	8170328	8172970	10.4699	1	MSTRG.19091	coe
44789	dd_Smes_g4_100	778885	778899	EBF1_MA0154.3	5.2468	-	dd_Smes_g4_100	776999	779000	8.08511	1	MSTRG.19091	coe
44802	dd_Smes_g4_103	400042	400056	EBF1_MA0154.3	4.52796	+	dd_Smes_g4_103	399399	401400	7.62726	1	MSTRG.19091	coe
44805	dd_Smes_g4_105	1764295	1764309	EBF1_MA0154.3	8.87549	+	dd_Smes_g4_105	1762529	1764530	7.68507	1	MSTRG.19091	coe
44815	dd_Smes_g4_108	249046	249060	EBF1_MA0154.3	9.17011	-	dd_Smes_g4_108	246534	251764	8.20193	1	MSTRG.19091	coe
44847	dd_Smes_g4_110	485354	485368	EBF1_MA0154.3	4.83297	-	dd_Smes_g4_110	483532	485533	9.98221	1	MSTRG.19091	coe
44858	dd_Smes_g4_111	1144658	1144672	EBF1_MA0154.3	6.6143	+	dd_Smes_g4_111	1143333	1145334	8.23551	1	MSTRG.19091	coe
44869	dd_Smes_g4_114	1177496	1177510	EBF1_MA0154.3	5.63965	-	dd_Smes_g4_114	1176714	1179849	7.48164	1	MSTRG.19091	coe
44924	dd_Smes_g4_125	1047507	1047521	EBF1_MA0154.3	8.72962	-	dd_Smes_g4_125	1046158	1050405	12.0618	1	MSTRG.19091	coe
44936	dd_Smes_g4_128	908782	908796	EBF1_MA0154.3	5.70942	+	dd_Smes_g4_128	908646	910884	7.94975	1	MSTRG.19091	coe
44938	dd_Smes_g4_128	1410396	1410410	EBF1_MA0154.3	7.37208	-	dd_Smes_g4_128	1406634	1411272	7.47114	1	MSTRG.19091	coe
44990	dd_Smes_g4_131	1417614	1417628	EBF1_MA0154.3	12.9009	+	dd_Smes_g4_131	1415487	1421818	7.87961	1	MSTRG.19091	coe
44993	dd_Smes_g4_131	1419701	1419715	EBF1_MA0154.3	7.62816	-	dd_Smes_g4_131	1415487	1421818	7.45381	1	MSTRG.19091	coe
44998	dd_Smes_g4_131	1685818	1685832	EBF1_MA0154.3	7.8724	+	dd_Smes_g4_131	1684914	1687289	9.02436	1	MSTRG.19091	coe
44999	dd_Smes_g4_131	1686280	1686294	EBF1_MA0154.3	4.84879	-	dd_Smes_g4_131	1684914	1687289	7.95094	1	MSTRG.19091	coe
45031	dd_Smes_g4_133	1568026	1568040	EBF1_MA0154.3	5.83163	-	dd_Smes_g4_133	1567895	1570545	7.67547	1	MSTRG.19091	coe
45032	dd_Smes_g4_133	1568176	1568190	EBF1_MA0154.3	5.50887	+	dd_Smes_g4_133	1567895	1570545	8.03449	1	MSTRG.19091	coe
45033	dd_Smes_g4_133	1568260	1568274	EBF1_MA0154.3	6.0814	-	dd_Smes_g4_133	1567895	1570545	10.1278	1	MSTRG.19091	coe
45054	dd_Smes_g4_134	1056153	1056167	EBF1_MA0154.3	8.99837	-	dd_Smes_g4_134	1055204	1057665	8.79662	1	MSTRG.19091	coe
45055	dd_Smes_g4_134	1056172	1056186	EBF1_MA0154.3	4.92274	-	dd_Smes_g4_134	1055204	1057665	7.94598	1	MSTRG.19091	coe
45056	dd_Smes_g4_134	1056267	1056281	EBF1_MA0154.3	5.94581	+	dd_Smes_g4_134	1055204	1057665	8.21873	1	MSTRG.19091	coe
45068	dd_Smes_g4_134	1718478	1718492	EBF1_MA0154.3	9.59767	-	dd_Smes_g4_134	1717405	1719406	8.25161	1	MSTRG.19091	coe
45106	dd_Smes_g4_14	3145654	3145668	EBF1_MA0154.3	4.52149	-	dd_Smes_g4_14	3144647	3149033	7.64658	1	MSTRG.19091	coe
45107	dd_Smes_g4_14	3659031	3659045	EBF1_MA0154.3	6.51709	-	dd_Smes_g4_14	3658183	3660184	7.72972	1	MSTRG.19091	coe
45117	dd_Smes_g4_14	5796434	5796448	EBF1_MA0154.3	5.32714	+	dd_Smes_g4_14	5796354	5800763	7.54276	1	MSTRG.19091	coe
45124	dd_Smes_g4_14	5938896	5938910	EBF1_MA0154.3	6.97495	+	dd_Smes_g4_14	5937151	5939152	8.54037	1	MSTRG.19091	coe
45133	dd_Smes_g4_140	974180	974194	EBF1_MA0154.3	11.1249	-	dd_Smes_g4_140	971908	974841	8.14516	1	MSTRG.19091	coe
45153	dd_Smes_g4_145	1194732	1194746	EBF1_MA0154.3	4.85953	+	dd_Smes_g4_145	1193687	1195688	7.4294	1	MSTRG.19091	coe
45158	dd_Smes_g4_145	1529366	1529380	EBF1_MA0154.3	5.13901	+	dd_Smes_g4_145	1528596	1530597	8.91955	1	MSTRG.19091	coe
45194	dd_Smes_g4_15	4487083	4487097	EBF1_MA0154.3	9.88311	+	dd_Smes_g4_15	4486621	4488622	8.15838	1	MSTRG.19091	coe
45236	dd_Smes_g4_15	7178517	7178531	EBF1_MA0154.3	6.33085	+	dd_Smes_g4_15	7176834	7180037	7.57451	1	MSTRG.19091	coe
45240	dd_Smes_g4_15	7406744	7406758	EBF1_MA0154.3	5.74395	-	dd_Smes_g4_15	7405851	7407861	8.35615	1	MSTRG.19091	coe
45244	dd_Smes_g4_15	7549250	7549264	EBF1_MA0154.3	5.03885	-	dd_Smes_g4_15	7548811	7550812	9.34141	1	MSTRG.19091	coe
45245	dd_Smes_g4_15	7550111	7550125	EBF1_MA0154.3	6.94988	-	dd_Smes_g4_15	7548811	7550812	8.03411	1	MSTRG.19091	coe
45246	dd_Smes_g4_15	7630078	7630092	EBF1_MA0154.3	5.65032	-	dd_Smes_g4_15	7628502	7630503	8.38365	1	MSTRG.19091	coe
45249	dd_Smes_g4_15	7792368	7792382	EBF1_MA0154.3	8.04793	-	dd_Smes_g4_15	7791332	7793333	7.56607	1	MSTRG.19091	coe
45251	dd_Smes_g4_15	7792987	7793001	EBF1_MA0154.3	6.23941	+	dd_Smes_g4_15	7791332	7793333	7.42937	1	MSTRG.19091	coe
45283	dd_Smes_g4_157	650472	650486	EBF1_MA0154.3	5.96953	-	dd_Smes_g4_157	650232	652233	8.11189	1	MSTRG.19091	coe
45289	dd_Smes_g4_157	697534	697548	EBF1_MA0154.3	9.02342	-	dd_Smes_g4_157	696585	698586	8.27011	1	MSTRG.19091	coe
45316	dd_Smes_g4_16	4676964	4676978	EBF1_MA0154.3	4.59051	-	dd_Smes_g4_16	4675827	4677828	7.86057	1	MSTRG.19091	coe
45361	dd_Smes_g4_172	267659	267673	EBF1_MA0154.3	5.18513	-	dd_Smes_g4_172	267287	270094	7.44356	1	MSTRG.19091	coe
45362	dd_Smes_g4_172	267676	267690	EBF1_MA0154.3	4.96416	+	dd_Smes_g4_172	267287	270094	7.44356	1	MSTRG.19091	coe
45365	dd_Smes_g4_172	704413	704427	EBF1_MA0154.3	5.7138	-	dd_Smes_g4_172	703375	705376	7.65787	1	MSTRG.19091	coe
45374	dd_Smes_g4_172	893861	893875	EBF1_MA0154.3	4.73363	-	dd_Smes_g4_172	892832	895000	8.26385	1	MSTRG.19091	coe
45375	dd_Smes_g4_172	894155	894169	EBF1_MA0154.3	6.30292	+	dd_Smes_g4_172	892832	895000	8.66642	1	MSTRG.19091	coe
45380	dd_Smes_g4_172	967412	967426	EBF1_MA0154.3	9.16192	+	dd_Smes_g4_172	966179	970890	9.87423	1	MSTRG.19091	coe
45383	dd_Smes_g4_172	974879	974893	EBF1_MA0154.3	6.30495	+	dd_Smes_g4_172	972613	976453	8.13874	1	MSTRG.19091	coe
45384	dd_Smes_g4_172	974987	975001	EBF1_MA0154.3	5.97224	-	dd_Smes_g4_172	972613	976453	8.4747	1	MSTRG.19091	coe
45458	dd_Smes_g4_186	937336	937350	EBF1_MA0154.3	5.62412	-	dd_Smes_g4_186	931928	938875	8.10601	1	MSTRG.19091	coe
45463	dd_Smes_g4_187	490588	490602	EBF1_MA0154.3	6.65184	-	dd_Smes_g4_187	489628	492457	8.73576	1	MSTRG.19091	coe
45490	dd_Smes_g4_19	1553509	1553523	EBF1_MA0154.3	4.54089	-	dd_Smes_g4_19	1550218	1554331	7.85705	1	MSTRG.19091	coe
45493	dd_Smes_g4_19	2190351	2190365	EBF1_MA0154.3	6.70096	+	dd_Smes_g4_19	2188625	2190626	7.6526	1	MSTRG.19091	coe
45518	dd_Smes_g4_196	690972	690986	EBF1_MA0154.3	7.23444	-	dd_Smes_g4_196	689886	691887	8.37206	1	MSTRG.19091	coe
45531	dd_Smes_g4_198	932482	932496	EBF1_MA0154.3	5.18182	+	dd_Smes_g4_198	931208	933209	7.88401	1	MSTRG.19091	coe
45555	dd_Smes_g4_2	12015403	12015417	EBF1_MA0154.3	6.37392	+	dd_Smes_g4_2	12014876	12016877	9.0698	1	MSTRG.19091	coe
45614	dd_Smes_g4_21	6861803	6861817	EBF1_MA0154.3	9.4865	+	dd_Smes_g4_21	6860341	6862342	8.32485	1	MSTRG.19091	coe
45639	dd_Smes_g4_218	499632	499646	EBF1_MA0154.3	5.61318	+	dd_Smes_g4_218	498128	500129	9.42981	1	MSTRG.19091	coe
45642	dd_Smes_g4_219	222171	222185	EBF1_MA0154.3	5.82537	-	dd_Smes_g4_219	220406	222407	11.1137	1	MSTRG.19091	coe
45663	dd_Smes_g4_225	439765	439779	EBF1_MA0154.3	9.74441	-	dd_Smes_g4_225	438527	440528	7.76224	1	MSTRG.19091	coe
45668	dd_Smes_g4_23	518279	518293	EBF1_MA0154.3	5.45806	-	dd_Smes_g4_23	517346	520320	7.8636	1	MSTRG.19091	coe
45680	dd_Smes_g4_231	408564	408578	EBF1_MA0154.3	10.3365	-	dd_Smes_g4_231	406859	411405	7.67864	1	MSTRG.19091	coe
45683	dd_Smes_g4_231	615360	615374	EBF1_MA0154.3	5.25503	+	dd_Smes_g4_231	614493	616494	7.655	1	MSTRG.19091	coe
45687	dd_Smes_g4_232	349761	349775	EBF1_MA0154.3	6.21762	-	dd_Smes_g4_232	348897	352802	7.4601	1	MSTRG.19091	coe
45689	dd_Smes_g4_232	417884	417898	EBF1_MA0154.3	4.98347	+	dd_Smes_g4_232	417051	419052	9.04854	1	MSTRG.19091	coe
45690	dd_Smes_g4_232	421043	421057	EBF1_MA0154.3	5.6146	+	dd_Smes_g4_232	419474	421475	7.38064	1	MSTRG.19091	coe
45695	dd_Smes_g4_232	526758	526772	EBF1_MA0154.3	4.87539	-	dd_Smes_g4_232	525341	527342	8.66266	1	MSTRG.19091	coe
45719	dd_Smes_g4_24	1031715	1031729	EBF1_MA0154.3	6.57507	+	dd_Smes_g4_24	1030434	1032435	8.05007	1	MSTRG.19091	coe
45752	dd_Smes_g4_257	552923	552937	EBF1_MA0154.3	5.50886	+	dd_Smes_g4_257	551784	553785	7.9909	1	MSTRG.19091	coe
45762	dd_Smes_g4_262	92685	92699	EBF1_MA0154.3	5.54033	+	dd_Smes_g4_262	91373	93374	15.2904	1	MSTRG.19091	coe
45786	dd_Smes_g4_265	421292	421306	EBF1_MA0154.3	13.8667	-	dd_Smes_g4_265	417866	422224	8.98008	1	MSTRG.19091	coe
45823	dd_Smes_g4_276	214734	214748	EBF1_MA0154.3	5.07342	+	dd_Smes_g4_276	213668	216137	7.61171	1	MSTRG.19091	coe
45831	dd_Smes_g4_29	223201	223215	EBF1_MA0154.3	6.09216	+	dd_Smes_g4_29	222803	224804	8.54666	1	MSTRG.19091	coe
45841	dd_Smes_g4_290	144260	144274	EBF1_MA0154.3	4.52325	-	dd_Smes_g4_290	143432	145433	7.79005	1	MSTRG.19091	coe
45845	dd_Smes_g4_297	128973	128987	EBF1_MA0154.3	4.98888	-	dd_Smes_g4_297	126643	134885	7.86106	1	MSTRG.19091	coe
45846	dd_Smes_g4_297	129233	129247	EBF1_MA0154.3	7.69059	+	dd_Smes_g4_297	126643	134885	9.78459	1	MSTRG.19091	coe
45862	dd_Smes_g4_3	3470336	3470350	EBF1_MA0154.3	5.26185	+	dd_Smes_g4_3	3469193	3477419	7.61261	1	MSTRG.19091	coe
45872	dd_Smes_g4_3	9851827	9851841	EBF1_MA0154.3	4.8769	-	dd_Smes_g4_3	9850844	9852845	7.78997	1	MSTRG.19091	coe
45888	dd_Smes_g4_30	1670256	1670270	EBF1_MA0154.3	12.8816	-	dd_Smes_g4_30	1669480	1671481	25.9706	1	MSTRG.19091	coe
45890	dd_Smes_g4_30	1837421	1837435	EBF1_MA0154.3	9.9929	+	dd_Smes_g4_30	1836251	1838252	8.42014	1	MSTRG.19091	coe
45893	dd_Smes_g4_30	2155303	2155317	EBF1_MA0154.3	4.71271	+	dd_Smes_g4_30	2154241	2156242	7.50751	1	MSTRG.19091	coe
45898	dd_Smes_g4_30	3863453	3863467	EBF1_MA0154.3	8.22902	-	dd_Smes_g4_30	3861540	3864241	7.61305	1	MSTRG.19091	coe
45907	dd_Smes_g4_31	356337	356351	EBF1_MA0154.3	5.80324	+	dd_Smes_g4_31	354581	356582	7.55326	1	MSTRG.19091	coe
45922	dd_Smes_g4_315	22326	22340	EBF1_MA0154.3	6.67231	-	dd_Smes_g4_315	21210	23211	28.6323	1	MSTRG.19091	coe
45937	dd_Smes_g4_32	3848574	3848588	EBF1_MA0154.3	7.50585	-	dd_Smes_g4_32	3847527	3849528	8.43563	1	MSTRG.19091	coe
45989	dd_Smes_g4_37	3626297	3626311	EBF1_MA0154.3	7.77253	-	dd_Smes_g4_37	3625286	3627287	7.96186	1	MSTRG.19091	coe
46091	dd_Smes_g4_428	28681	28695	EBF1_MA0154.3	5.91224	-	dd_Smes_g4_428	27933	29934	25.2292	1	MSTRG.19091	coe
46092	dd_Smes_g4_428	29133	29147	EBF1_MA0154.3	6.94388	+	dd_Smes_g4_428	27933	29934	33.1237	1	MSTRG.19091	coe
46105	dd_Smes_g4_44	1484926	1484940	EBF1_MA0154.3	5.92018	+	dd_Smes_g4_44	1483679	1485680	9.4246	1	MSTRG.19091	coe
46110	dd_Smes_g4_45	1264808	1264822	EBF1_MA0154.3	5.28005	+	dd_Smes_g4_45	1263365	1267424	7.51387	1	MSTRG.19091	coe
46112	dd_Smes_g4_45	3680694	3680708	EBF1_MA0154.3	5.79189	-	dd_Smes_g4_45	3679657	3681658	8.208	1	MSTRG.19091	coe
46133	dd_Smes_g4_49	303381	303395	EBF1_MA0154.3	8.3566	+	dd_Smes_g4_49	302520	304521	7.52871	1	MSTRG.19091	coe
46134	dd_Smes_g4_49	303666	303680	EBF1_MA0154.3	6.45721	+	dd_Smes_g4_49	302520	304521	7.47609	1	MSTRG.19091	coe
46178	dd_Smes_g4_50	1840443	1840457	EBF1_MA0154.3	7.50461	+	dd_Smes_g4_50	1839395	1842749	7.61663	1	MSTRG.19091	coe
46269	dd_Smes_g4_59	1887716	1887730	EBF1_MA0154.3	4.9769	-	dd_Smes_g4_59	1887260	1889261	7.38996	1	MSTRG.19091	coe
46273	dd_Smes_g4_59	2739715	2739729	EBF1_MA0154.3	6.94863	+	dd_Smes_g4_59	2739371	2741372	7.63304	1	MSTRG.19091	coe
46348	dd_Smes_g4_65	920092	920106	EBF1_MA0154.3	10.9387	+	dd_Smes_g4_65	918598	920599	7.81161	1	MSTRG.19091	coe
46381	dd_Smes_g4_7	2355934	2355948	EBF1_MA0154.3	6.67231	+	dd_Smes_g4_7	2354291	2356849	231.228	1	MSTRG.19091	coe
46387	dd_Smes_g4_70	845111	845125	EBF1_MA0154.3	6.19373	-	dd_Smes_g4_70	844206	846207	11.0678	1	MSTRG.19091	coe
46415	dd_Smes_g4_74	2316141	2316155	EBF1_MA0154.3	10.3263	-	dd_Smes_g4_74	2314738	2318799	8.39851	1	MSTRG.19091	coe
46427	dd_Smes_g4_76	2503583	2503597	EBF1_MA0154.3	5.65613	-	dd_Smes_g4_76	2503447	2506090	8.09206	1	MSTRG.19091	coe
46431	dd_Smes_g4_76	2516792	2516806	EBF1_MA0154.3	8.81797	+	dd_Smes_g4_76	2514194	2518625	8.08332	1	MSTRG.19091	coe
46434	dd_Smes_g4_76	2605289	2605303	EBF1_MA0154.3	7.04963	-	dd_Smes_g4_76	2604876	2609060	7.64742	1	MSTRG.19091	coe
46450	dd_Smes_g4_78	2901153	2901167	EBF1_MA0154.3	4.51373	+	dd_Smes_g4_78	2900350	2903685	7.48862	1	MSTRG.19091	coe
46480	dd_Smes_g4_83	664681	664695	EBF1_MA0154.3	4.90605	-	dd_Smes_g4_83	663205	669078	7.38018	1	MSTRG.19091	coe
46485	dd_Smes_g4_83	2736190	2736204	EBF1_MA0154.3	5.77658	+	dd_Smes_g4_83	2736181	2738182	7.85949	1	MSTRG.19091	coe
46487	dd_Smes_g4_83	2774643	2774657	EBF1_MA0154.3	7.27156	+	dd_Smes_g4_83	2774013	2776014	8.84685	1	MSTRG.19091	coe
46489	dd_Smes_g4_84	2142803	2142817	EBF1_MA0154.3	5.18473	-	dd_Smes_g4_84	2141691	2144803	7.45044	1	MSTRG.19091	coe
46528	dd_Smes_g4_89	323221	323235	EBF1_MA0154.3	8.67461	-	dd_Smes_g4_89	321722	323928	7.36887	1	MSTRG.19091	coe
46569	dd_Smes_g4_93	474129	474143	EBF1_MA0154.3	5.40135	-	dd_Smes_g4_93	473321	475322	9.69469	1	MSTRG.19091	coe
46580	dd_Smes_g4_94	1957185	1957199	EBF1_MA0154.3	7.57388	-	dd_Smes_g4_94	1956166	1958971	30.1776	1	MSTRG.19091	coe
46602	dd_Smes_g4_97	2185069	2185083	EBF1_MA0154.3	5.88738	+	dd_Smes_g4_97	2181908	2185819	7.72331	1	MSTRG.19091	coe
46619	dd_Smes_g4_1	2340635	2340649	EGR1_MA0162.2	4.78322	-	dd_Smes_g4_1	2339955	2341956	7.93285	1	MSTRG.2484:MSTRG.1218:MSTRG.9193	egr*-2:egr4-1:egr4-2
46626	dd_Smes_g4_1	2352439	2352453	EGR1_MA0162.2	7.43188	+	dd_Smes_g4_1	2350769	2352770	9.33033	1	MSTRG.2484:MSTRG.1218:MSTRG.9193	egr*-2:egr4-1:egr4-2
46632	dd_Smes_g4_1	2909599	2909613	EGR1_MA0162.2	4.74058	+	dd_Smes_g4_1	2909301	2914441	8.77308	1	MSTRG.2484:MSTRG.1218:MSTRG.9193	egr*-2:egr4-1:egr4-2
46637	dd_Smes_g4_1	2911879	2911893	EGR1_MA0162.2	4.78235	-	dd_Smes_g4_1	2909301	2914441	9.12731	1	MSTRG.2484:MSTRG.1218:MSTRG.9193	egr*-2:egr4-1:egr4-2
46658	dd_Smes_g4_1	3643219	3643233	EGR1_MA0162.2	7.82577	+	dd_Smes_g4_1	3641527	3643528	10.9549	1	MSTRG.2484:MSTRG.1218:MSTRG.9193	egr*-2:egr4-1:egr4-2
46670	dd_Smes_g4_1	4705032	4705046	EGR1_MA0162.2	5.76355	-	dd_Smes_g4_1	4703314	4708303	10.261	1	MSTRG.2484:MSTRG.1218:MSTRG.9193	egr*-2:egr4-1:egr4-2
46701	dd_Smes_g4_1	7587010	7587024	EGR1_MA0162.2	4.63372	+	dd_Smes_g4_1	7586024	7588025	7.73534	1	MSTRG.2484:MSTRG.1218:MSTRG.9193	egr*-2:egr4-1:egr4-2
[truncated: 20,490 more rows]
