# Supplementary material for: Identification of putative enhancer-like elements predicts regulatory networks active in planarian adult stem cells
Source: eLife. 2022 Aug 23;11:e79675. doi: 10.7554/eLife.79675 (PMC9522251; doi:10.7554/eLife.79675)
Supplement: Supplementary file 7. [file elife-79675-supp7.xlsx]

## Sheet: coe(RNAi)
	Unnamed: 0	baseMean	log2FoldChange	lfcSE	stat	pvalue	padj
0	MSTRG.5839	791.919	2.87973	0.154497	18.6394	1.54073e-77	2.47349e-73
1	MSTRG.9518	718.861	3.06682	0.19383	15.8222	2.18827e-56	1.75653e-52
2	MSTRG.13643	201.187	3.53678	0.231781	15.2591	1.43113e-52	7.65846e-49
3	MSTRG.9517	4594.57	2.49524	0.178691	13.964	2.58419e-44	1.03717e-40
4	MSTRG.13642	179.608	3.76643	0.279413	13.4798	2.05644e-41	6.60283e-38
5	MSTRG.20184	2065.88	1.64321	0.12364	13.2903	2.63581e-40	7.05255e-37
6	MSTRG.16150	119.646	-4.11052	0.312489	-13.1541	1.61136e-39	3.69554e-36
7	MSTRG.19493	109.938	4.39765	0.340645	12.9098	3.96473e-38	7.95622e-35
8	MSTRG.7000	97.6666	5.20145	0.411117	12.652	1.09083e-36	1.94579e-33
9	MSTRG.18461	3193.77	-1.00519	0.0813666	-12.3538	4.6469e-35	7.46013e-32
10	MSTRG.19351	8668.86	-1.17154	0.0954428	-12.2748	1.23723e-34	1.80568e-31
11	MSTRG.20320	3832.13	1.75012	0.143236	12.2185	2.47696e-34	3.31375e-31
12	MSTRG.9692	657.989	-1.65637	0.138258	-11.9803	4.5092e-33	5.56851e-30
13	SMESG000017971.1	4562.94	1.36847	0.115365	11.8621	1.86221e-32	2.13543e-29
14	MSTRG.15254	3434.41	2.26213	0.19166	11.8028	3.77349e-32	4.03864e-29
15	MSTRG.8964	6329.18	1.19826	0.111513	10.7455	6.22381e-27	6.24482e-24
16	MSTRG.23553	13455.6	1.11237	0.104539	10.6407	1.92657e-26	1.81936e-23
17	MSTRG.20569	3891.78	0.88726	0.0847383	10.4706	1.17915e-25	1.05167e-22
18	MSTRG.13506	396.757	5.16954	0.49522	10.4389	1.64721e-25	1.25925e-22
19	MSTRG.19091	275.821	-1.66166	0.159135	-10.4419	1.59663e-25	1.25925e-22
20	MSTRG.9903	3317.92	-1.49824	0.143481	-10.4421	1.59201e-25	1.25925e-22
21	MSTRG.12379	114.244	3.71957	0.358635	10.3715	3.34373e-25	2.44001e-22
22	MSTRG.22117	17068	-0.962713	0.0946676	-10.1694	2.71564e-24	1.89552e-21
23	MSTRG.18328	1826.42	1.64958	0.165275	9.98086	1.84853e-23	1.23651e-20
24	MSTRG.13515	92.1081	6.33798	0.636412	9.95892	2.30552e-23	1.48051e-20
25	MSTRG.15444	59.0747	4.28093	0.435561	9.82855	8.48328e-23	5.2381e-20
26	MSTRG.4619	2927.26	1.71527	0.182516	9.39793	5.56461e-21	3.30868e-18
27	MSTRG.8063	101.486	3.25427	0.351709	9.25275	2.18797e-20	1.25449e-17
28	MSTRG.23556	1673.66	1.41798	0.153587	9.23246	2.64488e-20	1.46417e-17
29	MSTRG.13826	538.78	1.78703	0.19379	9.22152	2.92911e-20	1.56746e-17
30	MSTRG.13825	158.401	3.22249	0.352087	9.15254	5.56116e-20	2.87996e-17
31	MSTRG.12966	1089.66	3.51522	0.385246	9.1246	7.20003e-20	3.61217e-17
32	MSTRG.9894	5156.74	1.88514	0.207228	9.09694	9.29149e-20	4.52017e-17
33	MSTRG.9462	1309.87	-1.30986	0.145547	-8.99956	2.26625e-19	1.07007e-16
34	MSTRG.13824	108.124	3.40262	0.380747	8.93669	4.01003e-19	1.83934e-16
35	MSTRG.9895	4827.86	-1.2106	0.137239	-8.82108	1.13358e-18	5.05514e-16
36	MSTRG.13804	6152	1.34657	0.153163	8.79178	1.47211e-18	6.38738e-16
37	SMESG000043867.1	52.739	4.09806	0.467375	8.76825	1.81459e-18	7.66615e-16
38	MSTRG.18462	1148.03	-0.783572	0.0894623	-8.75869	1.97539e-18	8.1315e-16
39	MSTRG.16025	2005.52	0.778641	0.0899339	8.65792	4.80431e-18	1.92821e-15
40	MSTRG.13460	147.889	3.01	0.351197	8.5707	1.02855e-17	4.0274e-15
41	MSTRG.5295	31977.4	-0.60374	0.0706851	-8.54126	1.32764e-17	5.07473e-15
42	MSTRG.7525	11090.6	0.820083	0.0966471	8.48533	2.1511e-17	8.0311e-15
43	MSTRG.13521	569.533	5.38249	0.634614	8.48151	2.22284e-17	8.11035e-15
44	MSTRG.17317	5550.83	1.53502	0.185374	8.28067	1.22486e-16	4.36974e-14
45	MSTRG.6991	421.149	2.1548	0.262097	8.2214	2.01134e-16	7.01959e-14
46	MSTRG.18313	1526.3	1.50679	0.183692	8.20279	2.34864e-16	8.02236e-14
47	MSTRG.16809	111.548	3.34878	0.408588	8.19598	2.48553e-16	8.31306e-14
48	MSTRG.4885	147.502	-1.89085	0.23172	-8.16009	3.34785e-16	1.09687e-13
49	MSTRG.12022	407.361	-0.965207	0.11863	-8.13626	4.07684e-16	1.30899e-13
50	MSTRG.11090	96.8782	2.52274	0.31125	8.10522	5.26519e-16	1.6574e-13
51	MSTRG.6493	147.291	2.23634	0.276371	8.09181	5.87832e-16	1.81482e-13
52	MSTRG.8064	491.45	1.92157	0.243866	7.87963	3.28354e-15	9.94602e-13
53	MSTRG.21274	216.675	-1.22986	0.156323	-7.86738	3.62139e-15	1.07663e-12
54	MSTRG.6774	203.653	-1.4759	0.1878	-7.85888	3.87568e-15	1.13128e-12
55	MSTRG.11706	49074	1.0306	0.131257	7.85176	4.10234e-15	1.17605e-12
56	MSTRG.6992	176.905	2.57485	0.329944	7.80391	6.00197e-15	1.69045e-12
57	MSTRG.13590	2745.61	-0.988966	0.126924	-7.7918	6.60593e-15	1.82848e-12
58	MSTRG.15759	867.903	0.811597	0.104914	7.7358	1.02757e-14	2.79605e-12
59	MSTRG.8292	284.171	1.34137	0.173516	7.73054	1.07088e-14	2.86532e-12
60	MSTRG.18326	179.144	2.05632	0.266188	7.72507	1.11788e-14	2.94203e-12
61	MSTRG.4341	63.6469	3.15683	0.410819	7.68422	1.53928e-14	3.92248e-12
62	MSTRG.9520	1252	3.23753	0.421314	7.68436	1.53769e-14	3.92248e-12
63	MSTRG.13805	337.926	1.61125	0.211079	7.63341	2.28629e-14	5.73501e-12
64	MSTRG.425	9055.63	0.847082	0.111112	7.6237	2.46507e-14	6.08834e-12
65	MSTRG.2200	47.8442	-2.66382	0.34977	-7.61591	2.6185e-14	6.3693e-12
66	MSTRG.15896	1856.8	-0.757779	0.100199	-7.5627	3.94773e-14	9.45924e-12
67	MSTRG.12120	40.0253	-3.13716	0.415321	-7.55358	4.23454e-14	9.99725e-12
68	MSTRG.18323	2671.73	1.39012	0.187189	7.42627	1.11701e-13	2.59891e-11
69	MSTRG.9904	819.167	-1.36591	0.18615	-7.33767	2.17344e-13	4.98464e-11
70	MSTRG.22832	1962.56	1.20133	0.167017	7.19286	6.34472e-13	1.43462e-10
71	MSTRG.5094	268.93	-1.02347	0.143291	-7.14261	9.15738e-13	2.04184e-10
72	MSTRG.4831	28444.7	0.626768	0.0878897	7.13131	9.94208e-13	2.18644e-10
73	MSTRG.16853	1187.1	1.16464	0.163601	7.11878	1.08887e-12	2.36225e-10
74	MSTRG.6327	16447.8	0.649364	0.0913613	7.10765	1.18039e-12	2.52666e-10
75	MSTRG.13524	1244.93	5.72866	0.806836	7.10015	1.24623e-12	2.63249e-10
76	MSTRG.2145	357.029	1.32327	0.189588	6.97969	2.95827e-12	6.1678e-10
77	MSTRG.13015	1194.61	0.714894	0.102955	6.94373	3.81881e-12	7.85989e-10
78	MSTRG.1275	649.603	0.973494	0.140336	6.9369	4.00801e-12	8.14489e-10
79	MSTRG.23187	531.278	3.11062	0.448745	6.93183	4.15417e-12	8.33639e-10
80	MSTRG.21946	1617.66	1.25081	0.182416	6.85694	7.03515e-12	1.39435e-09
81	MSTRG.17363	671.722	0.91764	0.134015	6.84729	7.52599e-12	1.47344e-09
82	MSTRG.19393	1550.81	-0.65048	0.0950241	-6.84542	7.62536e-12	1.47491e-09
83	MSTRG.14816	20337.1	-0.459313	0.0674599	-6.80868	9.84996e-12	1.88251e-09
84	MSTRG.15234	5264.58	0.793615	0.11696	6.78536	1.15795e-11	2.18702e-09
85	MSTRG.20567	1547.7	-0.620079	0.0915121	-6.77592	1.23617e-11	2.30761e-09
86	MSTRG.19777	379.828	1.6214	0.239585	6.76753	1.31002e-11	2.41737e-09
87	MSTRG.12722	638.197	0.887878	0.131899	6.73149	1.67939e-11	3.06374e-09
88	MSTRG.13443	44.4455	2.96194	0.441322	6.71152	1.92612e-11	3.47437e-09
89	MSTRG.6279	442.743	-1.02338	0.152723	-6.70088	2.07167e-11	3.69539e-09
90	MSTRG.9900	3073.03	-1.26846	0.189607	-6.68992	2.23298e-11	3.93937e-09
91	MSTRG.8491	2055.75	-0.793764	0.118962	-6.67243	2.51601e-11	4.39044e-09
92	MSTRG.3788	836.796	-0.739636	0.111571	-6.62926	3.37372e-11	5.82385e-09
93	MSTRG.12256	748.519	-0.672088	0.101773	-6.60378	4.00806e-11	6.84526e-09
94	MSTRG.4614	704.273	4.24436	0.643992	6.59071	4.37732e-11	7.39721e-09
95	MSTRG.19750	7966.9	0.664963	0.101125	6.57565	4.84413e-11	8.1008e-09
96	MSTRG.19559	209.765	-1.23777	0.188318	-6.57276	4.93907e-11	8.17442e-09
97	MSTRG.164	4174.61	0.489011	0.0749595	6.52368	6.86051e-11	1.12386e-08
98	MSTRG.22155	206.9	-1.18374	0.18192	-6.50695	7.66895e-11	1.24361e-08
99	MSTRG.13525	1080.72	6.67641	1.02902	6.48815	8.68946e-11	1.39501e-08
100	MSTRG.6094	770.153	-0.70691	0.109178	-6.47484	9.4912e-11	1.50863e-08
101	MSTRG.5829	2419.47	0.622611	0.0963292	6.46336	1.02403e-10	1.61175e-08
102	MSTRG.19785	469.791	1.44262	0.225664	6.39276	1.62918e-10	2.53931e-08
103	MSTRG.1745	1724.23	-0.645973	0.101278	-6.37819	1.79198e-10	2.76619e-08
104	MSTRG.12116	1081.91	-0.565273	0.0891639	-6.33971	2.30196e-10	3.51959e-08
105	MSTRG.22015	3280.35	0.644583	0.103085	6.25296	4.02746e-10	6.09971e-08
106	MSTRG.19558	773.155	0.904268	0.144737	6.24767	4.16634e-10	6.25107e-08
107	MSTRG.5480	2712.04	-0.552316	0.0885118	-6.24003	4.37482e-10	6.50308e-08
108	MSTRG.21277	147.482	-1.51669	0.243227	-6.2357	4.49771e-10	6.62443e-08
109	MSTRG.12216	26.9761	-3.16081	0.511315	-6.18172	6.34063e-10	9.25386e-08
110	MSTRG.14970	9061.52	-0.621129	0.100532	-6.17839	6.47581e-10	9.366e-08
111	MSTRG.14750	972.474	-1.01441	0.164291	-6.17446	6.63911e-10	9.45328e-08
112	MSTRG.4342	24.5004	3.5995	0.583	6.17411	6.65392e-10	9.45328e-08
113	MSTRG.6595	4628.8	0.50066	0.081217	6.16447	7.07186e-10	9.95892e-08
114	MSTRG.16902	20143.9	0.454014	0.0736841	6.16163	7.20014e-10	1.00514e-07
115	MSTRG.15498	821.373	1.26425	0.205954	6.13853	8.32891e-10	1.15269e-07
116	MSTRG.13465	201.053	1.12727	0.183802	6.13305	8.62079e-10	1.18289e-07
117	MSTRG.13505	437.644	5.39683	0.880992	6.12586	9.01952e-10	1.22711e-07
118	MSTRG.6548	637.14	-0.654258	0.107297	-6.09766	1.07632e-09	1.45204e-07
119	MSTRG.20665	2814.13	0.535544	0.0880925	6.07934	1.20676e-09	1.61444e-07
120	MSTRG.19210	427.708	-0.848731	0.140005	-6.06216	1.34306e-09	1.78194e-07
121	MSTRG.12265	27.6536	3.00225	0.495635	6.05738	1.38358e-09	1.82066e-07
122	MSTRG.11482	141.384	-1.1216	0.185485	-6.04685	1.47704e-09	1.92784e-07
123	MSTRG.21336	352.95	-0.898322	0.148622	-6.04436	1.50007e-09	1.9421e-07
124	MSTRG.7529	4238.09	0.784509	0.130034	6.03312	1.60826e-09	2.06553e-07
125	MSTRG.1828	4043.46	-0.477659	0.0793675	-6.01833	1.76228e-09	2.24537e-07
126	MSTRG.17083	427.579	-1.23545	0.206238	-5.99042	2.09304e-09	2.6458e-07
127	MSTRG.13598	168.061	-1.03446	0.174089	-5.9421	2.81395e-09	3.52931e-07
128	MSTRG.6625	1007.13	-0.581952	0.0981675	-5.92815	3.06366e-09	3.81271e-07
129	MSTRG.15760	312.416	0.855314	0.144591	5.91539	3.31082e-09	4.08861e-07
130	MSTRG.5002	1066.65	0.996467	0.168859	5.90116	3.60949e-09	4.42342e-07
131	MSTRG.15305	472.785	-0.746988	0.126624	-5.89927	3.65123e-09	4.44067e-07
132	MSTRG.3073	7179.4	-0.601874	0.102134	-5.893	3.79254e-09	4.57785e-07
133	MSTRG.19355	2874.62	-0.550617	0.0938858	-5.86475	4.49804e-09	5.37274e-07
134	MSTRG.20797	189.856	1.01278	0.172711	5.86402	4.518e-09	5.37274e-07
135	MSTRG.6087	52.2025	-1.80109	0.308014	-5.84742	4.99266e-09	5.89354e-07
136	MSTRG.18986	132.551	1.13929	0.19582	5.81807	5.95326e-09	6.97618e-07
137	MSTRG.12762	142780	1.07603	0.185043	5.81501	6.06317e-09	7.05348e-07
138	MSTRG.13683	7866.75	0.613008	0.106118	5.77665	7.62045e-09	8.80134e-07
139	MSTRG.20644	398.172	-0.980062	0.170516	-5.74761	9.0512e-09	1.03055e-06
140	MSTRG.21180	1075.08	0.811198	0.141132	5.74778	9.04252e-09	1.03055e-06
141	MSTRG.19349	88.2935	-1.38175	0.240495	-5.74544	9.16816e-09	1.03652e-06
142	MSTRG.3008	524.86	0.769933	0.134061	5.74314	9.29357e-09	1.04335e-06
143	MSTRG.6854	277.183	-0.947555	0.165172	-5.73677	9.65018e-09	1.07586e-06
144	MSTRG.6994	8781.55	0.830671	0.144922	5.73185	9.93418e-09	1.09989e-06
145	MSTRG.13992	127.328	-1.34124	0.234349	-5.72325	1.04508e-08	1.14915e-06
146	MSTRG.23662	8600.77	0.459352	0.0804723	5.70819	1.14183e-08	1.24701e-06
147	MSTRG.18621	1077.35	-0.520746	0.0912562	-5.70642	1.15378e-08	1.25154e-06
148	MSTRG.17243	151.821	-1.25322	0.219749	-5.70293	1.17763e-08	1.26883e-06
149	MSTRG.14077	1024.32	0.753109	0.132122	5.70008	1.19749e-08	1.28163e-06
150	MSTRG.14751	420.251	-1.31185	0.230269	-5.69703	1.21915e-08	1.29618e-06
151	MSTRG.12231	4126.73	-0.486365	0.0855696	-5.68385	1.31695e-08	1.39094e-06
152	MSTRG.22740	553.398	1.04991	0.184939	5.67707	1.37021e-08	1.43773e-06
153	MSTRG.20141	1902.66	-0.488286	0.0860366	-5.67532	1.38426e-08	1.44305e-06
154	MSTRG.6370	160.446	1.48547	0.262697	5.65469	1.56127e-08	1.61708e-06
155	MSTRG.7868	1125.86	-0.791638	0.140041	-5.6529	1.57764e-08	1.62355e-06
156	MSTRG.12347	719.947	0.681349	0.120626	5.64846	1.61892e-08	1.65543e-06
157	MSTRG.10227	380.415	0.885828	0.156869	5.64692	1.63345e-08	1.65971e-06
158	MSTRG.1590	122.089	-1.1116	0.196919	-5.64498	1.65203e-08	1.66803e-06
159	MSTRG.11494	616.099	-0.667235	0.118428	-5.6341	1.75971e-08	1.76565e-06
160	MSTRG.6330	7362.93	0.669897	0.119332	5.61372	1.98023e-08	1.97457e-06
161	MSTRG.5384	188.229	-1.02192	0.182506	-5.5994	2.15097e-08	2.12062e-06
162	MSTRG.8189	27.1055	-2.52229	0.450471	-5.59923	2.15312e-08	2.12062e-06
163	MSTRG.22419	559.955	0.627145	0.112546	5.57236	2.51306e-08	2.46004e-06
164	MSTRG.14883	7291.59	-0.46611	0.0838366	-5.55974	2.70176e-08	2.62873e-06
165	MSTRG.5496	15295.1	0.483214	0.0871344	5.54562	2.92921e-08	2.83286e-06
166	MSTRG.6989	5292.07	0.509848	0.0923647	5.51994	3.39112e-08	3.25994e-06
167	MSTRG.12534	1070.02	1.01919	0.184693	5.51826	3.42364e-08	3.26673e-06
168	MSTRG.15551	658.182	-0.711736	0.129018	-5.51657	3.45688e-08	3.26673e-06
169	MSTRG.2768	4312.38	0.596825	0.10819	5.51645	3.45923e-08	3.26673e-06
170	MSTRG.11769	36666.8	-0.520668	0.0944854	-5.51056	3.57688e-08	3.35808e-06
171	MSTRG.5197	4236.23	0.870802	0.158432	5.49639	3.87639e-08	3.61811e-06
172	MSTRG.3771	66.2171	1.57452	0.287053	5.48511	4.1321e-08	3.8345e-06
173	MSTRG.3521	1689.47	0.70238	0.128099	5.4831	4.17937e-08	3.85607e-06
174	MSTRG.21960	1661.43	0.520216	0.0950032	5.47577	4.35617e-08	3.99623e-06
175	MSTRG.15895	1073.57	-0.904198	0.165183	-5.47391	4.40204e-08	4.01536e-06
176	MSTRG.8395	139.665	-0.991844	0.181643	-5.46041	4.75042e-08	4.30866e-06
177	MSTRG.20777	3192.52	-0.438008	0.0802673	-5.45686	4.84631e-08	4.37094e-06
178	MSTRG.13523	932.313	0.936639	0.171889	5.44908	5.06302e-08	4.54088e-06
179	MSTRG.366	353.827	-1.05054	0.193456	-5.43035	5.62449e-08	5.01642e-06
180	MSTRG.11104	367.219	-0.797222	0.147156	-5.41755	6.04215e-08	5.35916e-06
181	MSTRG.12109	503.883	-0.966554	0.179292	-5.39094	7.00885e-08	6.18242e-06
182	MSTRG.21871	4721.71	0.520037	0.0965416	5.38666	7.17786e-08	6.2969e-06
183	MSTRG.17598	543.552	0.706719	0.131242	5.38484	7.25078e-08	6.3263e-06
184	MSTRG.2419	1571.46	-0.569111	0.105958	-5.37111	7.82514e-08	6.79053e-06
185	MSTRG.8066	4754.48	0.54191	0.100921	5.36963	7.88993e-08	6.80995e-06
186	MSTRG.7155	328.96	-1.01604	0.18969	-5.3563	8.49435e-08	7.29242e-06
187	MSTRG.2144	340.448	0.972072	0.181755	5.34825	8.88074e-08	7.54346e-06
188	MSTRG.6052	581.053	1.13997	0.213117	5.34905	8.84175e-08	7.54346e-06
189	MSTRG.7165	1355.31	-0.558248	0.104835	-5.32499	1.00957e-07	8.53032e-06
190	MSTRG.12261	1246.63	2.08624	0.392071	5.32107	1.03158e-07	8.67065e-06
191	MSTRG.15291	413.096	0.825821	0.155511	5.31037	1.09406e-07	9.14791e-06
192	MSTRG.6264	1903.29	0.638341	0.120408	5.30147	1.14873e-07	9.5553e-06
193	MSTRG.2555	2957.07	0.703763	0.133068	5.28876	1.2315e-07	1.0191e-05
194	MSTRG.2139	284.109	1.51086	0.286358	5.27614	1.31937e-07	1.08621e-05
195	MSTRG.16650	156.715	1.70821	0.323992	5.27238	1.34664e-07	1.10301e-05
196	MSTRG.5430	92.2219	-1.2911	0.246314	-5.24169	1.59109e-07	1.29662e-05
197	MSTRG.12011	951.651	0.660276	0.126197	5.23212	1.67579e-07	1.35874e-05
198	MSTRG.3546	1914.95	0.931299	0.178101	5.22906	1.70372e-07	1.37445e-05
199	MSTRG.10582	342.666	-0.660306	0.126653	-5.21351	1.85303e-07	1.48743e-05
200	MSTRG.12355	3421.66	0.737312	0.141742	5.2018	1.97372e-07	1.57642e-05
201	MSTRG.949	1403.68	0.500547	0.0963113	5.19718	2.02336e-07	1.60807e-05
202	MSTRG.13212	849.215	-0.547168	0.105486	-5.18712	2.13565e-07	1.68896e-05
203	MSTRG.12257	4472.08	-0.596236	0.115372	-5.16795	2.36679e-07	1.86257e-05
204	MSTRG.3508	2179.5	-0.399934	0.0774963	-5.16069	2.46043e-07	1.92495e-05
205	MSTRG.5394	242.238	-0.853184	0.165376	-5.15905	2.48203e-07	1.92495e-05
206	MSTRG.9088	352.572	0.910315	0.176444	5.15923	2.47968e-07	1.92495e-05
207	MSTRG.6993	7999.42	0.900472	0.175023	5.14488	2.67687e-07	2.06608e-05
208	MSTRG.22183	62.1758	-1.84687	0.359087	-5.14326	2.70015e-07	2.07408e-05
209	MSTRG.21999	100.151	1.44118	0.280801	5.13239	2.86086e-07	2.18706e-05
210	MSTRG.5048	728.821	-0.557345	0.108805	-5.12243	3.01621e-07	2.29489e-05
211	MSTRG.6998	4809.52	0.358963	0.0701005	5.12069	3.04415e-07	2.30523e-05
212	MSTRG.17705	627.731	0.540383	0.105715	5.11172	3.19243e-07	2.40355e-05
213	MSTRG.22431	1628.2	-0.414505	0.0811	-5.11104	3.20393e-07	2.40355e-05
214	MSTRG.21121	7275.67	0.685966	0.134398	5.10398	3.3259e-07	2.47688e-05
215	MSTRG.22571	559.897	-0.816224	0.159931	-5.1036	3.33254e-07	2.47688e-05
216	MSTRG.7905	1061.69	0.763812	0.14972	5.10162	3.36757e-07	2.47995e-05
217	SMESG000007018.1	327.893	0.88524	0.173502	5.10219	3.35745e-07	2.47995e-05
218	MSTRG.13262	282.253	-0.732339	0.143918	-5.08857	3.60776e-07	2.6447e-05
219	MSTRG.18847	747.053	0.590594	0.116091	5.08735	3.63101e-07	2.64965e-05
220	MSTRG.13440	242.63	-0.851829	0.167712	-5.07911	3.79214e-07	2.7547e-05
221	MSTRG.20837	326.079	-0.689124	0.135755	-5.07622	3.85009e-07	2.78421e-05
222	MSTRG.2967	1210.33	0.673635	0.132776	5.07347	3.90628e-07	2.81217e-05
223	MSTRG.16930	2506.47	0.890192	0.17553	5.07145	3.94787e-07	2.82943e-05
224	MSTRG.1692	8850.61	0.445485	0.0879118	5.06741	4.0326e-07	2.8773e-05
225	MSTRG.10241	3793.17	0.439447	0.0867608	5.06504	4.08324e-07	2.90055e-05
226	MSTRG.15724	2594.25	0.465589	0.0921258	5.05384	4.33022e-07	3.06243e-05
227	MSTRG.6216	2831.03	-0.53509	0.10614	-5.04137	4.62201e-07	3.25446e-05
228	MSTRG.3652	579.865	-0.744551	0.147895	-5.03432	4.79537e-07	3.36179e-05
229	MSTRG.18653	389.345	0.820777	0.163083	5.03288	4.83177e-07	3.37257e-05
230	MSTRG.14347	182.981	-1.16773	0.232153	-5.03001	4.90452e-07	3.40792e-05
231	MSTRG.21877	121.417	-1.00263	0.199361	-5.02922	4.92486e-07	3.40792e-05
232	MSTRG.15306	337.204	-0.762189	0.151707	-5.02407	5.05887e-07	3.48563e-05
233	MSTRG.8511	319.124	0.865224	0.172402	5.01866	5.20337e-07	3.56987e-05
234	MSTRG.2121	50.092	-1.6258	0.324675	-5.00747	5.51506e-07	3.76761e-05
235	MSTRG.3254	4608.46	-0.391098	0.0783131	-4.99403	5.91333e-07	4.02257e-05
236	MSTRG.19775	4071.03	1.56459	0.313666	4.98808	6.09834e-07	4.13092e-05
237	MSTRG.12201	3816.99	0.526669	0.105775	4.97912	6.38738e-07	4.30853e-05
238	MSTRG.19616	662.233	-0.558739	0.112278	-4.97637	6.47886e-07	4.35195e-05
239	MSTRG.6210	506.774	-0.552136	0.11114	-4.96793	6.76702e-07	4.52657e-05
240	MSTRG.4718	184.127	-0.85134	0.171654	-4.95964	7.06254e-07	4.70465e-05
241	MSTRG.21271	2034.03	-0.467149	0.094229	-4.95759	7.13732e-07	4.73482e-05
242	MSTRG.12760	16210.2	-1.7694	0.357099	-4.95492	7.23599e-07	4.78052e-05
243	MSTRG.17864	62.9975	-1.37471	0.277921	-4.94642	7.5589e-07	4.97339e-05
244	MSTRG.4339	38.324	2.02399	0.409513	4.94244	7.71527e-07	5.05555e-05
245	MSTRG.6652	410.747	-0.683022	0.138237	-4.94094	7.77455e-07	5.07368e-05
246	MSTRG.20570	759.37	4.59887	0.931668	4.93617	7.9671e-07	5.17829e-05
247	MSTRG.19574	1564.96	-0.500016	0.101328	-4.93464	8.02988e-07	5.19805e-05
248	MSTRG.14392	272.232	0.882416	0.178916	4.93201	8.13858e-07	5.22627e-05
249	MSTRG.17712	1291.26	0.582986	0.118199	4.93225	8.12864e-07	5.22627e-05
250	MSTRG.3323	1956.93	-0.827599	0.167987	-4.92656	8.36917e-07	5.35294e-05
251	MSTRG.2566	450.304	-0.773404	0.15758	-4.90801	9.20059e-07	5.86136e-05
252	MSTRG.8653	477.631	0.818595	0.166853	4.90608	9.29152e-07	5.89589e-05
253	MSTRG.6350	4066.4	0.650787	0.132815	4.89996	9.58562e-07	6.05856e-05
254	MSTRG.13557	248.617	-0.731467	0.149459	-4.89411	9.87508e-07	6.20896e-05
255	MSTRG.2439	144.842	-0.889961	0.181862	-4.8936	9.90092e-07	6.20896e-05
256	MSTRG.4607	822.276	-0.491173	0.100388	-4.89276	9.94338e-07	6.21132e-05
257	MSTRG.15108	205.867	0.941391	0.192476	4.89096	1.00347e-06	6.24409e-05
258	MSTRG.517	2649.03	0.477634	0.0977525	4.88616	1.02822e-06	6.37335e-05
259	MSTRG.10005	288.433	0.728679	0.149267	4.88172	1.05162e-06	6.49334e-05
260	MSTRG.1276	1115.01	0.496224	0.10177	4.87596	1.08282e-06	6.6604e-05
261	MSTRG.22017	2793.5	0.640058	0.131909	4.85225	1.22069e-06	7.47973e-05
262	MSTRG.6371	117.687	1.05103	0.218808	4.80343	1.55972e-06	9.52081e-05
263	MSTRG.7572	436.483	-0.626901	0.130583	-4.80079	1.58038e-06	9.61037e-05
264	MSTRG.1793	220.786	-0.752447	0.156801	-4.79874	1.59666e-06	9.67275e-05
265	MSTRG.16109	154.49	1.09791	0.229202	4.79014	1.66661e-06	0.000100586
266	MSTRG.20217	125.378	0.993751	0.207707	4.7844	1.71503e-06	0.00010312
267	MSTRG.20181	2401.19	3.65609	0.764295	4.78361	1.72172e-06	0.000103136
268	MSTRG.22784	101.777	1.24286	0.259878	4.78246	1.73166e-06	0.000103187
269	MSTRG.23078	2242.33	-0.375202	0.0784611	-4.78202	1.73543e-06	0.000103187
270	MSTRG.15137	2491.88	0.421225	0.0882111	4.7752	1.7953e-06	0.000106354
271	MSTRG.17055	268.074	2.80247	0.5875	4.77016	1.84076e-06	0.000108645
272	MSTRG.19890	1032.22	-0.505755	0.106164	-4.76391	1.89873e-06	0.000111656
273	MSTRG.9468	429.923	-0.585897	0.123122	-4.75867	1.94871e-06	0.000114177
274	MSTRG.15949	1109.71	0.42006	0.0884496	4.74914	2.04281e-06	0.000119256
275	MSTRG.13519	884.683	0.989506	0.208483	4.74622	2.07257e-06	0.000120555
276	MSTRG.2315	1109.2	0.465454	0.0983766	4.73135	2.23036e-06	0.000129264
277	MSTRG.20171	397.56	-0.778929	0.16504	-4.71962	2.3628e-06	0.000136441
278	MSTRG.22288	1037.89	-0.728242	0.154324	-4.7189	2.37119e-06	0.000136441
279	MSTRG.23450	688.099	-0.486992	0.103461	-4.70701	2.51381e-06	0.000144131
280	MSTRG.19451	1227.11	-0.523804	0.111309	-4.70587	2.52787e-06	0.000144422
281	MSTRG.17555	63.5348	-1.31117	0.278795	-4.703	2.56371e-06	0.000145949
282	MSTRG.18227	1669.02	-0.455886	0.097009	-4.69942	2.60897e-06	0.000148001
283	MSTRG.10021	1752.31	0.573662	0.122097	4.69842	2.62181e-06	0.000148206
284	MSTRG.11092	23.6765	2.57527	0.548662	4.69373	2.68274e-06	0.000151118
285	MSTRG.8298	114.503	1.14734	0.244494	4.69273	2.69588e-06	0.000151327
286	MSTRG.20029	958.282	0.75987	0.162213	4.68441	2.80773e-06	0.000157057
287	MSTRG.14576	800.904	-0.45188	0.0964847	-4.68344	2.82098e-06	0.00015725
288	MSTRG.7343	136.061	1.10031	0.235612	4.67	3.01206e-06	0.00016732
289	MSTRG.11919	1862.36	0.522153	0.111954	4.66399	3.10129e-06	0.000171683
290	MSTRG.11095	77.4209	1.11587	0.239295	4.66317	3.11382e-06	0.000171784
291	MSTRG.13593	26.0046	-2.21639	0.475501	-4.66117	3.14422e-06	0.000172867
292	MSTRG.4338	1136.18	-0.64452	0.13841	-4.65659	3.21488e-06	0.000176149
293	MSTRG.23283	460.436	-0.594854	0.127862	-4.65232	3.28215e-06	0.000179223
294	MSTRG.19749	6866.38	0.608701	0.132222	4.60361	4.15234e-06	0.000225972
295	MSTRG.1648	717.902	-0.508281	0.110645	-4.59379	4.35258e-06	0.000235789
296	MSTRG.7903	59.2776	1.28079	0.278837	4.59334	4.36211e-06	0.000235789
297	MSTRG.21357	1348.63	-0.527987	0.115005	-4.591	4.41131e-06	0.000237648
298	MSTRG.1486	1105.84	-0.467476	0.102373	-4.5664	4.96176e-06	0.000265521
299	MSTRG.2334	498.698	0.674763	0.147748	4.56697	4.94817e-06	0.000265521
300	MSTRG.3566	645.418	0.908555	0.199293	4.5589	5.14228e-06	0.000274266
301	MSTRG.17788	855.714	-0.439944	0.0966895	-4.55007	5.36288e-06	0.000285085
302	MSTRG.16906	21103.1	0.342226	0.0752527	4.54768	5.42395e-06	0.00028738
303	MSTRG.11087	1070.64	1.63652	0.360189	4.54349	5.53293e-06	0.000291232
304	MSTRG.16581	6006.19	0.668174	0.147044	4.54405	5.51845e-06	0.000291232
305	MSTRG.16501	864.703	0.729199	0.160568	4.54138	5.58877e-06	0.000292406
306	MSTRG.22470	1067.28	0.582513	0.128271	4.54127	5.59166e-06	0.000292406
307	MSTRG.20455	23724	0.584058	0.128766	4.5358	5.73844e-06	0.000299107
308	MSTRG.11838	304.839	-0.611735	0.135227	-4.52377	6.07488e-06	0.000314149
309	MSTRG.16830	3464.55	-0.473226	0.104646	-4.52214	6.12169e-06	0.000314149
310	MSTRG.4837	157.192	-0.956686	0.211547	-4.52232	6.1165e-06	0.000314149
311	MSTRG.5145	2927.46	0.610067	0.134878	4.52312	6.09344e-06	0.000314149
312	MSTRG.7906	1086.71	0.942618	0.20845	4.52203	6.12486e-06	0.000314149
313	MSTRG.2573	223.883	-0.676322	0.149965	-4.50985	6.48735e-06	0.000331681
314	MSTRG.16211	280.692	-0.625631	0.138752	-4.50899	6.51359e-06	0.000331965
315	MSTRG.227	901.936	-0.488897	0.108565	-4.50327	6.69163e-06	0.00033996
316	MSTRG.2706	1018.21	-0.503156	0.111754	-4.50236	6.72032e-06	0.000340341
317	MSTRG.189	567.601	-0.564979	0.125554	-4.49988	6.79916e-06	0.000343251
318	MSTRG.6368	1886.88	-0.363991	0.0809235	-4.49797	6.86054e-06	0.000345264
319	MSTRG.11929	1362.86	0.41816	0.0931387	4.48965	7.13405e-06	0.000357906
320	MSTRG.13036	1317.8	-0.459322	0.102366	-4.48706	7.22114e-06	0.000361147
321	MSTRG.15898	1732.01	-0.820997	0.18304	-4.48534	7.27965e-06	0.000362943
322	MSTRG.492	371.486	-0.642695	0.143585	-4.47607	7.60296e-06	0.000377888
323	SMESG000019997.1	277.949	2.80008	0.625863	4.47395	7.6786e-06	0.00038047
324	MSTRG.2071	640.107	0.567607	0.12706	4.46725	7.9231e-06	0.000391329
325	MSTRG.6160	7672.88	0.484345	0.108437	4.46662	7.94651e-06	0.000391329
326	MSTRG.17105	1542.88	-0.433828	0.0972119	-4.46271	8.0931e-06	0.000397329
327	MSTRG.5387	104.944	-0.932771	0.209069	-4.46154	8.13739e-06	0.000398285
328	MSTRG.16778	192.79	-0.800268	0.179425	-4.46017	8.18934e-06	0.00039961
329	MSTRG.8346	260.163	-0.623221	0.139787	-4.45837	8.2587e-06	0.000401773
330	MSTRG.9753	327.83	-0.605642	0.136004	-4.45311	8.46365e-06	0.0004105
331	MSTRG.18169	22.932	-2.41612	0.542812	-4.45112	8.5425e-06	0.000413076
332	MSTRG.18321	6241.84	2.53005	0.569143	4.44538	8.77383e-06	0.000422988
333	MSTRG.13375	3695.07	0.528632	0.11918	4.43557	9.18273e-06	0.000440059
334	MSTRG.5198	3930.96	0.412427	0.0929815	4.43559	9.18215e-06	0.000440059
335	MSTRG.1170	1314.07	-0.405213	0.0914419	-4.43137	9.36343e-06	0.000446055
336	MSTRG.19491	959.838	-0.402991	0.0909377	-4.4315	9.35794e-06	0.000446055
337	MSTRG.12493	36.8576	-1.67944	0.379237	-4.42848	9.49009e-06	0.000450751
338	MSTRG.3879	330.415	-0.620081	0.140294	-4.41986	9.87642e-06	0.000467717
339	MSTRG.16615	196.056	-0.798014	0.180639	-4.41772	9.97474e-06	0.000470984
340	MSTRG.7001	87.0528	1.57349	0.356346	4.41563	1.00714e-05	0.000474154
341	MSTRG.19279	756.646	0.901672	0.204361	4.41216	1.02343e-05	0.000480414
342	MSTRG.7176	4602.31	-0.472317	0.107128	-4.40893	1.03884e-05	0.000486225
343	MSTRG.985	2255.27	0.455784	0.103834	4.38954	1.13591e-05	0.000530113
344	MSTRG.8756	927.086	-0.458815	0.104689	-4.38264	1.17248e-05	0.000545592
345	MSTRG.13098	2117.47	0.724356	0.165364	4.38036	1.18481e-05	0.000548845
346	MSTRG.13446	977.566	-0.653089	0.149104	-4.38009	1.1863e-05	0.000548845
347	MSTRG.1791	171.818	-0.730625	0.166854	-4.37882	1.19323e-05	0.000550464
348	MSTRG.7010	2497.42	-0.549301	0.12553	-4.37586	1.20956e-05	0.000556398
349	MSTRG.19573	261.949	0.635136	0.145211	4.37389	1.22054e-05	0.000559843
350	MSTRG.21420	204.265	-0.922266	0.210948	-4.37201	1.23108e-05	0.000563072
351	MSTRG.3727	3682.25	0.386128	0.0884012	4.3679	1.25447e-05	0.000572137
352	MSTRG.1253	583.305	-0.499201	0.114369	-4.36482	1.27229e-05	0.000578622
353	MSTRG.19233	969.088	-0.474034	0.108752	-4.35883	1.30757e-05	0.000592988
354	MSTRG.15711	4811.1	0.4756	0.109146	4.35748	1.31569e-05	0.000594986
355	MSTRG.9094	1758.85	-0.523437	0.120369	-4.34862	1.36998e-05	0.000617801
356	MSTRG.12304	3612.4	-0.614328	0.141708	-4.33518	1.45638e-05	0.000654923
357	MSTRG.13091	2639.55	-0.443149	0.102266	-4.3333	1.46888e-05	0.000658699
358	MSTRG.22074	908.385	-0.434946	0.100387	-4.33268	1.47303e-05	0.00065872
359	MSTRG.2556	1718.79	0.840365	0.194049	4.33068	1.48647e-05	0.000662884
360	MSTRG.5395	687.809	-0.640817	0.148093	-4.32712	1.51072e-05	0.000671831
361	MSTRG.15765	1265.46	-0.388615	0.0899298	-4.32132	1.55099e-05	0.000687836
362	MSTRG.19582	157.704	-0.793615	0.18402	-4.31267	1.61297e-05	0.000713352
363	MSTRG.10521	415.713	-0.614944	0.14268	-4.30994	1.63298e-05	0.000720215
364	MSTRG.2506	20360.5	0.607715	0.141206	4.30374	1.67935e-05	0.000738639
365	MSTRG.20939	988.43	1.63261	0.379439	4.30271	1.68725e-05	0.000740084
366	MSTRG.6414	444.289	-0.516966	0.120543	-4.28866	1.79753e-05	0.000786308
367	MSTRG.2805	2304.76	0.728695	0.170818	4.26591	1.99085e-05	0.000868509
368	MSTRG.6319	687.728	0.959891	0.225117	4.26396	2.00836e-05	0.000873774
369	MSTRG.9662	1086.57	0.461041	0.108231	4.25978	2.04632e-05	0.000887883
370	MSTRG.8091	928.661	0.461009	0.108264	4.25821	2.06066e-05	0.000891694
371	MSTRG.16836	452.871	-0.521181	0.122604	-4.25094	2.12876e-05	0.000918685
372	MSTRG.3735	166.677	0.78307	0.184323	4.24835	2.15346e-05	0.000926854
373	MSTRG.5797	320.509	-0.611825	0.144142	-4.2446	2.18988e-05	0.00094001
374	MSTRG.18606	4597.83	0.46204	0.108886	4.24333	2.20231e-05	0.000942824
375	MSTRG.7181	271.964	-0.635754	0.149927	-4.24043	2.23088e-05	0.000952515
376	MSTRG.22639	615.576	-0.463552	0.109373	-4.23828	2.25237e-05	0.000959141
377	MSTRG.14196	827.01	-0.423427	0.0999557	-4.23615	2.27389e-05	0.000965741
378	MSTRG.15960	848.44	-0.569846	0.134792	-4.22759	2.36211e-05	0.00100056
379	MSTRG.10562	574.874	-0.458197	0.108454	-4.22479	2.3916e-05	0.00101039
380	MSTRG.22716	551.41	-0.533672	0.126376	-4.2229	2.41184e-05	0.00101627
381	MSTRG.7929	281.811	-0.597905	0.141653	-4.22092	2.43309e-05	0.00102253
382	MSTRG.11490	117.366	-0.888941	0.210942	-4.21415	2.50719e-05	0.00105092
383	MSTRG.9148	370.952	-0.60132	0.142715	-4.21342	2.51531e-05	0.00105158
384	MSTRG.15071	2501.26	0.843987	0.200496	4.20949	2.55948e-05	0.00106727
385	MSTRG.18460	45.6311	-1.40592	0.334226	-4.20649	2.59373e-05	0.00107875
386	SMESG000053822.1	129.407	0.836051	0.198917	4.20301	2.63385e-05	0.00109261
387	MSTRG.10878	53.5462	1.44001	0.342773	4.20107	2.6566e-05	0.0010992
388	MSTRG.2639	73.1917	1.22592	0.292112	4.19675	2.70767e-05	0.00111745
389	MSTRG.6996	10555.7	0.327157	0.0781942	4.1839	2.86547e-05	0.00117954
390	MSTRG.10019	2337.84	0.445815	0.106904	4.17025	3.0426e-05	0.00124926
391	MSTRG.17413	2355.06	0.439643	0.105476	4.16819	3.07022e-05	0.00125627
392	MSTRG.17815	1687.82	0.649759	0.155899	4.16781	3.07534e-05	0.00125627
393	MSTRG.5476	337.009	-0.553921	0.133288	-4.15583	3.24113e-05	0.00132064
394	MSTRG.22951	38.8669	1.52432	0.367418	4.14872	3.34344e-05	0.00135887
395	MSTRG.248	90.697	-0.943545	0.227493	-4.14757	3.36019e-05	0.00136223
396	MSTRG.8893	2356.82	0.817402	0.197385	4.14116	3.45555e-05	0.00139737
397	MSTRG.16978	1506.6	0.838093	0.202671	4.13525	3.54573e-05	0.00143023
398	MSTRG.22387	305.716	-0.617287	0.149395	-4.1319	3.59773e-05	0.00144757
399	MSTRG.6065	2086.85	0.363311	0.0879422	4.13125	3.60797e-05	0.00144806
400	MSTRG.8120	600.465	0.746392	0.180869	4.12671	3.67994e-05	0.00147326
401	MSTRG.3179	75.4676	1.56586	0.379572	4.12533	3.70198e-05	0.0014784
402	MSTRG.7538	1094.65	0.398471	0.0967355	4.11918	3.80227e-05	0.00151468
403	MSTRG.14726	528.611	-0.483429	0.11743	-4.11675	3.84247e-05	0.00152691
404	MSTRG.13153	259.407	-0.600411	0.146163	-4.10781	3.99421e-05	0.00158329
405	MSTRG.15025	8748.84	0.318459	0.0776188	4.10286	4.08077e-05	0.00161361
406	MSTRG.17613	751.702	-0.438414	0.106933	-4.09988	4.13358e-05	0.00163048
407	MSTRG.13374	401.566	0.558894	0.136371	4.09834	4.16124e-05	0.00163737
408	MSTRG.4355	3907.44	-0.412745	0.100731	-4.09749	4.1766e-05	0.00163939
409	MSTRG.4014	674.139	-0.467627	0.114326	-4.09028	4.3085e-05	0.00168704
410	MSTRG.15022	1394.52	1.47055	0.360018	4.08465	4.41439e-05	0.0017243
411	MSTRG.16286	1591.11	-0.337291	0.0827357	-4.07673	4.56743e-05	0.00177975
412	MSTRG.10848	527.052	0.48344	0.118617	4.07564	4.5887e-05	0.0017837
413	MSTRG.5520	43986.6	-0.317005	0.0778261	-4.07325	4.63612e-05	0.00179778
414	MSTRG.11359	284.037	-0.588449	0.144606	-4.06933	4.7149e-05	0.00182393
415	MSTRG.10484	332.956	-0.634508	0.156027	-4.06665	4.76938e-05	0.00184057
416	MSTRG.11084	2094.33	-0.398514	0.0980751	-4.06336	4.83719e-05	0.00186226
417	MSTRG.2732	506.144	-0.45418	0.111829	-4.06137	4.87849e-05	0.00187367
418	MSTRG.5791	224.439	-0.602064	0.148354	-4.05828	4.9435e-05	0.0018941
419	MSTRG.5891	60.8803	-1.11767	0.275524	-4.05653	4.98065e-05	0.0019038
420	MSTRG.18513	263.737	0.629195	0.155209	4.05384	5.03835e-05	0.00192128
421	MSTRG.19974	137.763	-0.829524	0.204781	-4.05079	5.10453e-05	0.0019419
422	MSTRG.20877	1106.69	0.424196	0.104801	4.04764	5.17358e-05	0.00195903
423	MSTRG.23019	799.404	-0.431357	0.10657	-4.04763	5.17396e-05	0.00195903
424	MSTRG.19087	487.344	-0.484027	0.119603	-4.04696	5.1887e-05	0.00195999
425	MSTRG.16959	311.056	-0.536502	0.132876	-4.03763	5.39936e-05	0.00203477
426	MSTRG.2808	498.776	-0.465252	0.11532	-4.03446	5.47287e-05	0.00205764
427	MSTRG.19425	1441.01	-0.339298	0.084154	-4.03187	5.53352e-05	0.00207075
428	MSTRG.9818	97.4934	-0.911929	0.226172	-4.03201	5.53011e-05	0.00207075
429	MSTRG.21352	767.84	-0.49018	0.12183	-4.02348	5.73432e-05	0.0021409
430	MSTRG.9054	266.117	-0.656752	0.163307	-4.02158	5.78093e-05	0.00215329
431	SMESG000074160.1	277.283	0.75255	0.187155	4.021	5.79517e-05	0.0021536
432	MSTRG.8124	298.955	0.583445	0.145277	4.01608	5.91742e-05	0.00219396
433	MSTRG.13151	751.088	0.687226	0.171414	4.00916	6.09346e-05	0.00225402
434	MSTRG.17118	102.833	-0.887445	0.221685	-4.00318	6.24954e-05	0.00230644
435	MSTRG.3916	1651.26	0.371722	0.0929162	4.00062	6.31772e-05	0.00232625
436	MSTRG.4213	701.52	-0.451015	0.112763	-3.99965	6.3436e-05	0.00233044
437	MSTRG.17907	205.248	0.883755	0.221326	3.993	6.52424e-05	0.00239133
438	MSTRG.8048	530.553	0.486835	0.122062	3.98841	6.65165e-05	0.00243247
439	MSTRG.2680	190.755	-0.665141	0.166862	-3.98617	6.71486e-05	0.00245001
440	MSTRG.9844	73.1197	-0.974902	0.244635	-3.98513	6.74418e-05	0.00245513
441	MSTRG.14409	897.483	0.460799	0.115847	3.97766	6.95963e-05	0.00252783
442	MSTRG.3842	1106.39	-0.451448	0.113529	-3.9765	6.99382e-05	0.00253444
443	MSTRG.4664	3524.48	0.294138	0.0739791	3.97597	7.0094e-05	0.00253444
444	MSTRG.16669	8426.77	0.33586	0.0846323	3.96846	7.23373e-05	0.00260967
445	MSTRG.21410	805.207	-0.545985	0.138091	-3.9538	7.69209e-05	0.00276881
446	MSTRG.8855	375.17	-0.480436	0.121534	-3.95308	7.71504e-05	0.00277086
447	MSTRG.12931	421.955	0.758159	0.192075	3.9472	7.90719e-05	0.00282722
448	MSTRG.15335	1152.26	0.74777	0.18944	3.94727	7.90471e-05	0.00282722
449	MSTRG.11406	1282.3	0.447547	0.113507	3.94291	8.04986e-05	0.00287183
450	MSTRG.11964	240.845	-0.567109	0.144005	-3.93811	8.21263e-05	0.00291694
451	MSTRG.6987	7803.49	0.367899	0.0934135	3.93839	8.20291e-05	0.00291694
452	MSTRG.3917	2568.16	0.383966	0.0977619	3.92757	8.58102e-05	0.00304105
453	MSTRG.18012	1513.04	-0.438865	0.111784	-3.92601	8.63661e-05	0.00305401
454	MSTRG.3534	329.136	-0.684719	0.174713	-3.9191	8.8881e-05	0.00313603
455	MSTRG.17116	1002.03	0.381371	0.0975615	3.90903	9.26679e-05	0.00326248
456	MSTRG.8733	334.705	-0.51652	0.132264	-3.90524	9.41337e-05	0.00330683
457	MSTRG.19965	179.552	0.744391	0.190665	3.90419	9.45407e-05	0.00331388
458	MSTRG.6594	212.964	-0.652285	0.167097	-3.90364	9.47558e-05	0.00331418
459	MSTRG.1576	846.011	0.46566	0.119319	3.90264	9.51505e-05	0.00332075
460	MSTRG.22345	769.921	-0.507914	0.130263	-3.89914	9.65339e-05	0.00336172
461	MSTRG.12950	1814.87	-0.414282	0.106307	-3.89702	9.73834e-05	0.00338397
462	MSTRG.6601	1102.03	-0.583603	0.149821	-3.89533	9.80648e-05	0.00340029
463	MSTRG.22668	837.694	0.444855	0.114273	3.89292	9.90469e-05	0.00342694
464	MSTRG.15070	54.074	1.16289	0.298992	3.88938	0.000100501	0.00346976
465	MSTRG.20343	192.22	-0.774404	0.199401	-3.88365	0.000102901	0.003545
466	MSTRG.12697	2062.14	0.545091	0.140545	3.8784	0.000105145	0.00360596
467	MSTRG.15620	13755.4	0.532613	0.137344	3.87794	0.000105344	0.00360596
468	MSTRG.8553	882.731	0.398141	0.102661	3.87821	0.000105228	0.00360596
469	MSTRG.1238	237.074	0.832864	0.214962	3.87447	0.000106857	0.0036422
470	MSTRG.16346	560.818	-0.46562	0.120166	-3.87481	0.000106709	0.0036422
471	MSTRG.14945	2369.4	0.532676	0.137548	3.87265	0.00010766	0.0036618
472	MSTRG.11649	2952.51	0.381302	0.0984773	3.87198	0.000107957	0.00366414
473	MSTRG.6667	4184.12	0.299743	0.0774394	3.87068	0.000108531	0.00367585
474	MSTRG.22549	173.435	-0.685209	0.17708	-3.86949	0.000109065	0.00368617
475	MSTRG.18133	1464.9	-0.457094	0.118205	-3.86696	0.0001102	0.00371672
476	MSTRG.5307	3937.64	0.293591	0.0759922	3.86344	0.000111803	0.003755
477	MSTRG.6297	63.4766	-1.06111	0.274633	-3.86376	0.000111657	0.003755
478	MSTRG.8323	941.304	0.456185	0.118299	3.85621	0.000115158	0.00385961
479	MSTRG.21220	901.512	0.607843	0.157735	3.85356	0.000116412	0.0038854
480	MSTRG.4324	5501.74	1.20415	0.31246	3.85376	0.000116316	0.0038854
481	MSTRG.14734	391.674	-0.480425	0.124933	-3.84546	0.000120325	0.00400766
482	MSTRG.14946	816.794	0.609063	0.158438	3.84416	0.000120966	0.00402068
483	MSTRG.23271	1179.5	0.49332	0.128378	3.84271	0.000121685	0.00403622
484	MSTRG.15467	1404.79	0.449641	0.117076	3.84059	0.00012274	0.00405847
485	MSTRG.19079	44.9981	1.25583	0.327011	3.84035	0.000122861	0.00405847
486	MSTRG.12010	9251.86	0.318775	0.0830318	3.83919	0.000123443	0.00406932
487	MSTRG.4613	1481.39	1.46684	0.382415	3.83572	0.000125198	0.0041187
488	MSTRG.17628	272.243	-0.595411	0.155516	-3.8286	0.000128872	0.0042309
489	MSTRG.17002	2741.5	0.569281	0.148803	3.82573	0.000130384	0.00427181
490	MSTRG.14972	714.627	0.468835	0.122623	3.82338	0.000131633	0.00430395
491	MSTRG.13608	422.971	-0.525729	0.137534	-3.82254	0.000132087	0.00431
492	MSTRG.10057	4337	0.566282	0.148232	3.82025	0.000133314	0.00434124
493	MSTRG.22688	17543.9	0.33192	0.0869402	3.8178	0.000134647	0.00437575
494	MSTRG.1039	226.538	-0.594368	0.155784	-3.81534	0.000135995	0.00440052
495	MSTRG.13016	255.541	0.607763	0.159332	3.81444	0.000136494	0.00440052
496	MSTRG.13362	3474.3	0.322283	0.0844908	3.81442	0.000136505	0.00440052
497	MSTRG.15221	403.961	-0.499098	0.130801	-3.8157	0.000135796	0.00440052
498	MSTRG.12237	716.342	-0.401529	0.105428	-3.80856	0.00013978	0.00449273
499	MSTRG.3336	88.6358	-0.900698	0.236509	-3.8083	0.000139925	0.00449273
500	MSTRG.11310	235.056	-0.574424	0.150898	-3.80669	0.000140837	0.00451297
501	MSTRG.4953	6532.78	-0.517843	0.136097	-3.80496	0.000141825	0.00453556
502	MSTRG.22091	210.628	0.692703	0.18257	3.79417	0.00014814	0.00472811
503	MSTRG.10421	671.493	0.62566	0.164931	3.79347	0.000148559	0.00473208
504	MSTRG.21729	836.348	0.399106	0.105333	3.78898	0.000151267	0.00479929
505	MSTRG.2698	1049.15	-0.421913	0.111341	-3.78938	0.000151026	0.00479929
506	MSTRG.22897	566.602	0.506707	0.133811	3.78673	0.00015264	0.0048333
507	MSTRG.16827	813.256	0.617453	0.163146	3.78468	0.000153908	0.00486386
508	MSTRG.1292	896.944	-0.420562	0.111176	-3.78286	0.000155036	0.00488988
509	MSTRG.343	1591.2	-0.436618	0.115489	-3.7806	0.000156452	0.00492487
510	MSTRG.121	162.727	-0.66255	0.175426	-3.77679	0.00015886	0.00498767
511	MSTRG.3926	2086.84	-0.373638	0.0989385	-3.77647	0.000159069	0.00498767
512	MSTRG.21135	241.295	-0.538724	0.142787	-3.77291	0.000161356	0.00504952
513	MSTRG.5660	364.018	0.499175	0.132425	3.76951	0.000163571	0.00510888
514	MSTRG.21817	34.4741	1.74662	0.463571	3.76775	0.000164726	0.00513496
515	MSTRG.4434	8183.75	0.318633	0.0846839	3.76261	0.000168149	0.00523153
516	MSTRG.12932	69.257	1.22507	0.325766	3.76058	0.000169522	0.00526403
517	MSTRG.19681	1957.28	0.375118	0.100038	3.74977	0.000176999	0.00547502
518	SMESG000019863.1	120.094	0.825309	0.22007	3.75021	0.000176688	0.00547502
519	MSTRG.12895	108.996	0.868007	0.2316	3.74788	0.000178337	0.00547609
520	MSTRG.14526	880.086	-0.356584	0.0951572	-3.74731	0.000178739	0.00547609
521	MSTRG.152	401.633	-0.503641	0.134395	-3.74747	0.000178624	0.00547609
522	MSTRG.18592	10344.8	1.1192	0.298639	3.74767	0.000178483	0.00547609
523	MSTRG.6014	5751.6	0.300256	0.0801042	3.74832	0.000178024	0.00547609
524	MSTRG.15745	234.416	0.69463	0.185729	3.74002	0.000184004	0.00562667
525	MSTRG.21864	346.1	-0.498605	0.133732	-3.72838	0.000192713	0.00588177
526	MSTRG.1631	225.844	-0.639647	0.172117	-3.71634	0.00020213	0.00615747
527	MSTRG.13975	773.106	-0.388199	0.105153	-3.69176	0.000222704	0.00677137
528	MSTRG.350	642.031	-0.402748	0.109289	-3.68517	0.000228551	0.00693601
529	MSTRG.4659	1485.57	0.3689	0.100151	3.68343	0.00023012	0.00697047
530	MSTRG.12464	274.293	-0.5871	0.159438	-3.68232	0.000231125	0.00698773
531	MSTRG.10006	99.0824	0.781308	0.212393	3.6786	0.000234519	0.00707701
532	MSTRG.10658	154.388	-0.707678	0.192527	-3.67573	0.000237169	0.00714356
533	MSTRG.7671	2880.81	0.371577	0.101138	3.67396	0.000238819	0.00717976
534	MSTRG.7734	200.457	-0.663082	0.180549	-3.67258	0.000240114	0.0072052
535	MSTRG.20540	3833.37	0.348607	0.0950249	3.66859	0.000243892	0.00730494
536	MSTRG.18114	205.861	-0.572215	0.156201	-3.66333	0.000248958	0.00744278
537	MSTRG.3618	1438.74	0.486014	0.132694	3.66266	0.000249614	0.00744852
538	MSTRG.16538	852.039	-0.36389	0.0994167	-3.66025	0.000251967	0.00750478
539	MSTRG.6811	370.902	-0.654561	0.178869	-3.65945	0.000252757	0.00751437
540	SMESG000066529.1	108.39	0.873608	0.238818	3.65806	0.000254136	0.0075414
541	MSTRG.11089	522.393	2.61287	0.717432	3.64197	0.00027056	0.00800018
542	MSTRG.18576	837.127	0.368244	0.101112	3.64194	0.000270593	0.00800018
543	MSTRG.13405	207.24	0.638943	0.175547	3.63972	0.000272936	0.00805462
544	MSTRG.5234	890.834	0.421056	0.115888	3.63331	0.000279805	0.00824218
545	MSTRG.3062	290.232	-0.523698	0.144287	-3.62955	0.000283913	0.00833532
546	MSTRG.5408	384.101	-0.489776	0.134944	-3.62947	0.000284005	0.00833532
547	MSTRG.7893	385.994	0.496492	0.136917	3.62623	0.000287587	0.00842505
548	MSTRG.15559	413.053	-0.64481	0.177975	-3.62304	0.000291157	0.00851408
549	MSTRG.19527	897.213	0.38218	0.105507	3.62231	0.000291987	0.00852283
550	MSTRG.11339	1718.78	0.375901	0.103982	3.61507	0.00030027	0.00874135
551	MSTRG.1176	231.888	-0.573163	0.158559	-3.61481	0.000300562	0.00874135
552	MSTRG.15285	18809.4	0.332063	0.0918794	3.61412	0.000301364	0.00874883
553	MSTRG.9301	1018	-0.350832	0.09711	-3.61273	0.000302991	0.00878016
554	MSTRG.1595	3589.01	0.451718	0.125267	3.60603	0.000310912	0.00899347
555	MSTRG.7002	27.6751	2.15671	0.598568	3.60311	0.000314428	0.00907884
556	MSTRG.14971	4968.08	-0.667251	0.18536	-3.59977	0.000318505	0.00911677
557	MSTRG.16184	374.761	-0.439402	0.122093	-3.59892	0.000319546	0.00911677
558	MSTRG.1628	3067.1	0.294392	0.0818161	3.59822	0.0003204	0.00911677
559	MSTRG.21270	36.2112	-1.29878	0.36095	-3.59823	0.000320387	0.00911677
560	MSTRG.2232	719.634	-0.462451	0.128532	-3.59794	0.000320742	0.00911677
561	MSTRG.22704	3115.78	0.273809	0.0760261	3.60151	0.00031637	0.00911677
562	MSTRG.4654	3316.62	-0.338828	0.094175	-3.59785	0.000320853	0.00911677
563	MSTRG.6649	15024.2	0.35392	0.09831	3.60004	0.000318164	0.00911677
564	MSTRG.8394	987.856	0.338732	0.0941238	3.59879	0.000319698	0.00911677
565	MSTRG.20900	91.1112	-0.784368	0.218146	-3.59561	0.000323628	0.00917936
566	MSTRG.21211	445.722	-0.439572	0.122316	-3.59375	0.000325953	0.009229
567	MSTRG.22874	397.797	-0.50915	0.141941	-3.58705	0.000334445	0.00945279
568	MSTRG.23480	652.956	-0.488433	0.13623	-3.58535	0.00033663	0.00949781
569	MSTRG.3187	111.562	-0.733043	0.204506	-3.58445	0.000337791	0.00951387
570	MSTRG.11705	3514.48	0.342763	0.0956997	3.58165	0.000341431	0.00959952
571	MSTRG.17807	1080.33	-0.412728	0.115315	-3.57913	0.000344745	0.00965888
572	MSTRG.19343	165.159	-0.662507	0.185099	-3.5792	0.00034465	0.00965888
573	MSTRG.2489	2135.39	0.307478	0.0859274	3.57835	0.000345776	0.00967088
574	MSTRG.19157	333.179	-0.543891	0.152123	-3.57534	0.000349777	0.00976579
575	MSTRG.11770	920.665	0.388779	0.108779	3.57402	0.000351535	0.00979783
576	MSTRG.18965	2931.97	-0.37098	0.104011	-3.56672	0.000361475	0.0100574
577	MSTRG.8896	1500.51	0.76095	0.213433	3.56528	0.000363465	0.0100953
578	MSTRG.14827	869.459	0.409329	0.114927	3.56165	0.000368535	0.0102184
579	MSTRG.8146	1137.04	0.354006	0.0995241	3.55699	0.000375125	0.0103832
580	MSTRG.4942	1427.63	-0.338661	0.0952823	-3.5543	0.000378993	0.0104722
581	MSTRG.11126	1166.54	-0.357984	0.100779	-3.55218	0.000382047	0.0105204
582	MSTRG.6334	20505.4	0.415876	0.117065	3.55253	0.000381552	0.0105204
583	MSTRG.17054	530.819	2.21906	0.625928	3.54524	0.000392256	0.0107653
584	MSTRG.8805	2859.83	-0.288426	0.0813561	-3.54522	0.000392281	0.0107653
585	MSTRG.5881	2521.99	-0.396776	0.111946	-3.54436	0.000393567	0.0107821
586	MSTRG.4254	141.912	-0.646476	0.182424	-3.54381	0.000394393	0.0107863
587	MSTRG.20272	1409.29	0.355541	0.100378	3.542	0.000397102	0.010842
588	MSTRG.19704	1667.82	0.405028	0.114371	3.54134	0.000398097	0.0108507
589	MSTRG.15680	367.731	-0.430997	0.1219	-3.53566	0.000406764	0.0110681
590	MSTRG.140	649.882	-0.435283	0.123201	-3.53311	0.000410708	0.0111565
591	MSTRG.490	559.796	0.389259	0.110189	3.53264	0.000411438	0.0111575
592	MSTRG.7634	184.597	-0.666499	0.188727	-3.53156	0.00041312	0.0111842
593	MSTRG.14786	495.597	0.502209	0.142388	3.52705	0.000420223	0.0113383
594	MSTRG.8047	282.156	0.676138	0.19169	3.52724	0.00041992	0.0113383
595	MSTRG.23416	346.643	-0.450516	0.127807	-3.52497	0.000423529	0.0114083
596	MSTRG.16014	3145.4	0.316331	0.0897599	3.52418	0.000424788	0.011423
597	MSTRG.2557	509.452	-0.475768	0.135059	-3.52267	0.000427221	0.0114692
598	MSTRG.20174	55.3924	0.98486	0.279782	3.5201	0.000431377	0.0115551
599	MSTRG.20606	12542	0.419609	0.119214	3.51981	0.000431859	0.0115551
600	MSTRG.22524	1206.58	-0.372975	0.106081	-3.51594	0.000438192	0.0117051
601	MSTRG.5913	123.818	-0.729257	0.20754	-3.51382	0.000441716	0.0117796
602	MSTRG.2331	283.311	-0.681097	0.193879	-3.51299	0.000443087	0.0117965
603	MSTRG.1160	348.106	-0.473806	0.134934	-3.51138	0.000445794	0.011849
604	MSTRG.4400	2121.93	0.363497	0.103592	3.50893	0.000449906	0.0119385
605	MSTRG.16310	542.427	0.537871	0.153321	3.50813	0.000451265	0.0119527
606	MSTRG.7790	2372.77	0.346793	0.0988651	3.50774	0.000451931	0.0119527
607	MSTRG.21206	139.649	-0.731947	0.208742	-3.50647	0.000454096	0.0119902
608	MSTRG.15423	398.238	-0.441429	0.125993	-3.50359	0.000459034	0.0121007
609	MSTRG.16813	800.205	-0.338884	0.0967408	-3.50301	0.000460036	0.0121072
610	MSTRG.4089	687.166	-0.391665	0.111823	-3.50254	0.00046085	0.0121088
611	MSTRG.1879	2166.12	0.291301	0.0832023	3.50111	0.000463317	0.0121142
612	MSTRG.22339	1353.18	-0.373358	0.106637	-3.50121	0.000463152	0.0121142
613	MSTRG.3844	154.448	0.710203	0.202803	3.50194	0.000461885	0.0121142
614	MSTRG.21127	385.982	-0.45228	0.129287	-3.49827	0.000468292	0.0122243
615	MSTRG.23636	203.12	-0.579495	0.165959	-3.4918	0.000479786	0.012504
616	MSTRG.8479	140.021	-0.685557	0.196544	-3.48807	0.000486526	0.0126591
617	MSTRG.21175	5008.95	-0.624551	0.179184	-3.48554	0.000491143	0.0127586
618	MSTRG.10034	285.138	0.535831	0.154193	3.47506	0.000510735	0.0132461
619	MSTRG.20458	2101.8	0.323504	0.0932119	3.47063	0.00051923	0.0134447
620	MSTRG.6897	640.78	0.412822	0.118968	3.47002	0.000520415	0.0134537
621	MSTRG.9383	228	-0.536183	0.154577	-3.46871	0.000522971	0.013498
622	MSTRG.17366	3232.52	0.344756	0.099407	3.46813	0.000524102	0.0135055
623	MSTRG.169	2074.36	-0.313204	0.0903365	-3.46708	0.000526153	0.0135366
624	MSTRG.9782	6700.27	0.284514	0.0822375	3.45966	0.000540855	0.0138926
625	MSTRG.21363	765.358	-0.607057	0.175686	-3.45535	0.000549573	0.014094
626	MSTRG.13753	3194.52	0.329839	0.0955954	3.45037	0.000559821	0.0143023
627	MSTRG.15519	623.172	0.49803	0.144349	3.45018	0.000560215	0.0143023
628	MSTRG.17113	205.392	0.555197	0.160922	3.45011	0.000560366	0.0143023
629	MSTRG.6525	332.17	-0.585047	0.169601	-3.44955	0.000561514	0.0143088
630	MSTRG.4111	2029.68	-0.27625	0.0802825	-3.44097	0.000579627	0.014747
631	MSTRG.15131	254.09	-0.74104	0.215674	-3.43592	0.000590541	0.0149869
632	SMESG000029555.1	106.58	0.767041	0.223253	3.43575	0.000590925	0.0149869
633	MSTRG.12255	4789.74	-0.469429	0.136851	-3.43023	0.000603065	0.0152466
634	MSTRG.13068	2009.43	0.288304	0.084043	3.43043	0.000602622	0.0152466
635	MSTRG.20957	504.268	-0.380931	0.111139	-3.42752	0.000609127	0.0153757
636	MSTRG.17446	902.23	-0.391895	0.1144	-3.42564	0.000613345	0.0154578
637	MSTRG.15893	36.9249	-1.20191	0.351032	-3.42392	0.000617239	0.0155316
638	MSTRG.14944	2527.61	0.479362	0.140104	3.42148	0.000622803	0.0156471
639	MSTRG.1272	98.7437	-0.722474	0.211228	-3.42036	0.00062539	0.0156875
640	MSTRG.3731	138.743	1.00642	0.294417	3.41833	0.000630058	0.0157625
641	MSTRG.5642	70.7108	-1.01491	0.296912	-3.41821	0.000630344	0.0157625
642	MSTRG.17392	583.954	-0.36983	0.108298	-3.41494	0.000637971	0.0159284
643	MSTRG.940	299.698	1.58347	0.46384	3.41384	0.000640552	0.0159681
644	MSTRG.11012	975.052	0.391336	0.114774	3.40962	0.000650543	0.0161669
645	MSTRG.6030	1640.04	0.276025	0.0809477	3.40991	0.000649832	0.0161669
646	MSTRG.5968	37.0938	-1.35335	0.397261	-3.4067	0.00065753	0.0163153
647	MSTRG.13493	153.815	-0.87583	0.257188	-3.40542	0.000660635	0.016367
648	MSTRG.7548	328.711	-0.493894	0.145243	-3.40046	0.000672725	0.0166409
649	MSTRG.6653	120.794	-0.761924	0.224286	-3.39712	0.000681	0.0168196
650	MSTRG.12538	57.7049	-0.945045	0.278226	-3.39668	0.000682075	0.0168203
651	MSTRG.11567	1154.07	0.479259	0.141207	3.39403	0.000688721	0.0169582
652	MSTRG.11796	2905.64	-0.266428	0.0785814	-3.39047	0.000697723	0.0171535
653	MSTRG.16664	1111.67	0.516771	0.152468	3.38939	0.000700495	0.0171953
654	MSTRG.14439	193.369	-0.659731	0.194874	-3.38543	0.000710679	0.0173995
655	MSTRG.17409	638.872	0.578325	0.170834	3.38531	0.000710979	0.0173995
656	MSTRG.7975	141.736	-0.682152	0.201658	-3.38272	0.000717711	0.0175375
657	MSTRG.17827	643.231	-0.431664	0.127977	-3.37299	0.000743575	0.0180986
658	MSTRG.5154	6750.24	0.408347	0.121057	3.37317	0.000743079	0.0180986
659	MSTRG.7570	312.676	-0.482218	0.142972	-3.37281	0.000744056	0.0180986
660	MSTRG.13917	636.85	-0.375593	0.111433	-3.37059	0.000750087	0.0182177
661	MSTRG.16348	14278.4	0.361386	0.107323	3.36728	0.000759142	0.0184098
662	MSTRG.1227	1080.65	0.441578	0.131198	3.36575	0.000763358	0.0184664
663	MSTRG.8666	67.8042	-0.900573	0.267582	-3.3656	0.000763779	0.0184664
664	MSTRG.4459	1343.52	0.353858	0.105235	3.36253	0.000772308	0.0186166
665	MSTRG.8387	15874.4	0.350086	0.104105	3.36281	0.00077154	0.0186166
666	MSTRG.19721	2225.23	-0.394946	0.117524	-3.36056	0.000777845	0.0186466
667	MSTRG.3015	602.437	-0.358574	0.106718	-3.36002	0.000779361	0.0186466
668	MSTRG.309	322.244	-0.566424	0.168524	-3.36108	0.000776379	0.0186466
669	MSTRG.416	403.381	-0.622214	0.185171	-3.36021	0.000778842	0.0186466
670	MSTRG.5744	1997.61	-0.274336	0.0816311	-3.36068	0.000777495	0.0186466
671	MSTRG.8643	2831.7	-0.307178	0.0914927	-3.3574	0.000786781	0.0187961
672	MSTRG.3963	3576.88	0.300799	0.0896597	3.35489	0.000793957	0.0189394
673	MSTRG.12537	187.417	1.89171	0.563986	3.35418	0.000796005	0.01896
674	MSTRG.21678	748.034	-0.458621	0.136817	-3.35207	0.000802104	0.019077
675	MSTRG.15402	73.7145	-0.953735	0.284847	-3.34823	0.000813295	0.0193146
676	MSTRG.18976	175.066	-0.564199	0.168528	-3.3478	0.000814555	0.0193159
677	MSTRG.1589	1667.55	0.438333	0.131053	3.34471	0.000823687	0.0195037
678	MSTRG.12008	26689.1	0.261168	0.0781435	3.34216	0.000831289	0.0196546
679	MSTRG.18239	140.24	0.670228	0.200683	3.33973	0.000838591	0.0197981
680	MSTRG.11308	1647.11	-0.28468	0.0852813	-3.33813	0.000843454	0.0198546
681	MSTRG.9567	1000.63	-0.461857	0.138357	-3.33816	0.000843365	0.0198546
682	MSTRG.19011	860.199	-0.339087	0.101598	-3.33753	0.000845269	0.0198681
683	MSTRG.1956	211.901	-0.582871	0.174765	-3.33516	0.000852491	0.0200086
684	MSTRG.12371	1663.67	0.39899	0.119824	3.32979	0.000869104	0.0203687
685	MSTRG.5006	748.713	-0.339628	0.102245	-3.3217	0.000894706	0.0209382
686	MSTRG.11094	8163.21	0.275295	0.0829025	3.32071	0.0008979	0.0209824
687	MSTRG.10841	440.801	0.419967	0.126575	3.31794	0.000906856	0.0210995
688	MSTRG.17676	188.472	-0.640391	0.192995	-3.31817	0.000906085	0.0210995
689	SMESG000012882.1	50.3827	1.03188	0.310996	3.31798	0.00090671	0.0210995
690	MSTRG.19331	226.487	-0.612677	0.184795	-3.31544	0.000915002	0.0212582
691	MSTRG.19980	1163.99	-0.308717	0.0931907	-3.31275	0.000923844	0.0214326
692	MSTRG.18579	68.619	-0.86389	0.260895	-3.31125	0.000928791	0.0215163
693	MSTRG.684	10760.8	0.363977	0.11001	3.30858	0.000937691	0.0216912
694	MSTRG.12260	2095.37	-0.388084	0.117351	-3.30705	0.000942847	0.0217791
695	MSTRG.21687	1134.81	0.374661	0.113327	3.30601	0.000946355	0.0218287
696	MSTRG.14943	506.256	0.493136	0.149202	3.30515	0.000949245	0.021864
697	MSTRG.6331	1996.32	0.372721	0.112996	3.29854	0.000971885	0.0223534
698	MSTRG.23664	3996.97	0.297969	0.0903938	3.29635	0.000979505	0.0224964
699	MSTRG.21327	541.058	-0.612269	0.185959	-3.29249	0.000993032	0.0227745
700	MSTRG.1416	354.554	0.703559	0.213886	3.28942	0.00100395	0.0228921
701	MSTRG.18158	862.092	-0.325924	0.0990893	-3.28919	0.00100474	0.0228921
702	MSTRG.4206	1627.25	-0.335836	0.102069	-3.29028	0.00100089	0.0228921
703	MSTRG.5493	53.4045	0.954653	0.290261	3.28894	0.00100564	0.0228921
704	MSTRG.7937	181.138	-0.568056	0.172664	-3.28994	0.00100207	0.0228921
705	MSTRG.8036	1895.84	-0.511949	0.155672	-3.28864	0.00100672	0.0228921
706	MSTRG.8092	254.379	0.536259	0.163322	3.28344	0.00102548	0.0232528
707	MSTRG.9390	67.0714	-0.82131	0.250108	-3.28382	0.0010241	0.0232528
708	MSTRG.17906	7281.17	0.485805	0.148113	3.27997	0.00103817	0.0234744
709	MSTRG.18418	93.3882	-0.705498	0.215081	-3.28015	0.00103752	0.0234744
710	MSTRG.14957	34.9238	1.20866	0.368555	3.27945	0.00104011	0.0234851
711	MSTRG.9559	4554.54	0.301627	0.0921258	3.27408	0.00106006	0.023902
712	MSTRG.19392	260.206	-0.523221	0.159937	-3.27142	0.00107008	0.0240941
713	MSTRG.9780	1041.71	0.400443	0.122676	3.26423	0.00109762	0.0246795
714	MSTRG.8038	1158.26	-0.490694	0.150377	-3.26308	0.00110208	0.0247451
715	MSTRG.16914	472.477	0.412921	0.126575	3.26226	0.00110526	0.0247474
716	MSTRG.23227	2148.85	0.344652	0.105644	3.2624	0.00110473	0.0247474
717	MSTRG.6009	1290.96	0.281147	0.0862699	3.25892	0.00111836	0.0250058
718	MSTRG.18265	1340.1	-0.306944	0.0942586	-3.2564	0.00112835	0.0251769
719	MSTRG.19088	1197.6	0.439336	0.134923	3.2562	0.00112915	0.0251769
720	MSTRG.16433	4379.32	-0.299554	0.092112	-3.25206	0.00114573	0.0255111
721	MSTRG.8943	2622.18	0.309166	0.0952601	3.24549	0.0011725	0.0260711
722	MSTRG.14219	2017.45	-0.302678	0.0932791	-3.24486	0.00117507	0.0260921
723	MSTRG.17894	250.195	0.485062	0.14961	3.24217	0.00118625	0.0263039
724	MSTRG.9454	607.946	-0.335349	0.103505	-3.23992	0.00119562	0.0264752
725	MSTRG.12971	1050.68	-0.361877	0.111729	-3.23889	0.00119994	0.0265342
726	MSTRG.2092	38.2952	-1.28852	0.397937	-3.23801	0.00120366	0.0265509
727	MSTRG.4291	119.879	-0.712934	0.220182	-3.23793	0.001204	0.0265509
728	MSTRG.2795	1463.25	-0.374282	0.115615	-3.23731	0.00120662	0.0265721
729	MSTRG.16806	2286.78	-0.303516	0.0937938	-3.23599	0.0012122	0.0266584
730	MSTRG.1946	1509.04	0.416713	0.128791	3.23559	0.00121393	0.02666
731	MSTRG.11823	1977.12	0.266088	0.0822939	3.23339	0.00122332	0.026793
732	MSTRG.16156	169.358	-0.554519	0.171492	-3.23349	0.00122287	0.026793
733	MSTRG.8735	485.809	-0.385839	0.119421	-3.23092	0.00123394	0.0269886
734	MSTRG.21985	2315.13	0.262212	0.0812132	3.22869	0.00124359	0.0271599
735	MSTRG.9095	108.617	-0.773857	0.239708	-3.22833	0.00124515	0.0271599
736	MSTRG.14476	261.879	0.534883	0.165981	3.22257	0.00127048	0.0276746
737	MSTRG.12105	138.55	-0.747675	0.232134	-3.22087	0.001278	0.0278008
738	MSTRG.22178	50.2503	-0.940731	0.292116	-3.2204	0.00128012	0.0278092
739	MSTRG.3437	343.639	-0.585832	0.181978	-3.21925	0.00128527	0.0278835
740	MSTRG.15146	4485.44	0.318261	0.0989961	3.21489	0.00130496	0.0282221
741	MSTRG.2255	162.944	0.604672	0.1881	3.21462	0.00130615	0.0282221
742	MSTRG.5713	205.812	-0.515001	0.160173	-3.21528	0.00130315	0.0282221
743	MSTRG.11803	296.945	0.427064	0.132989	3.21127	0.00132152	0.0285156
744	MSTRG.8528	1614.13	0.633567	0.197374	3.20998	0.00132744	0.028605
745	MSTRG.11846	492.39	-0.497376	0.155004	-3.2088	0.0013329	0.0286842
746	MSTRG.1996	2235.7	0.288357	0.0900682	3.20154	0.00136696	0.0292734
747	MSTRG.22828	995.29	1.14593	0.357858	3.20219	0.00136387	0.0292734
748	MSTRG.3624	891.48	0.432177	0.134976	3.20188	0.00136535	0.0292734
749	MSTRG.6209	152.07	-0.637353	0.199085	-3.20141	0.00136758	0.0292734
750	MSTRG.1209	57.2276	-0.925824	0.289254	-3.20073	0.00137079	0.0293031
751	MSTRG.7689	10348.4	0.298128	0.0931775	3.19957	0.00137635	0.0293828
752	MSTRG.1267	564.813	-0.33748	0.10555	-3.19735	0.00138696	0.0295701
753	MSTRG.14828	308.177	0.420093	0.131409	3.19684	0.00138941	0.0295831
754	MSTRG.1927	161.836	-0.590839	0.184897	-3.1955	0.00139586	0.0296418
755	MSTRG.526	147.373	0.674309	0.211007	3.19568	0.00139504	0.0296418
756	MSTRG.15063	242.962	-0.487185	0.152478	-3.19511	0.00139778	0.0296432
757	MSTRG.1273	920.279	0.377414	0.118148	3.1944	0.0014012	0.0296765
758	MSTRG.22488	6440.71	-0.420809	0.131796	-3.19289	0.00140859	0.0297938
759	MSTRG.3791	219.929	-0.481705	0.150913	-3.19194	0.00141322	0.0298524
760	MSTRG.1056	70.3538	-0.994933	0.311875	-3.19017	0.00142191	0.029877
761	MSTRG.12416	1987.98	-0.297408	0.0932235	-3.19027	0.00142141	0.029877
762	MSTRG.14884	678.792	-0.467013	0.146425	-3.18943	0.00142555	0.029877
763	MSTRG.17119	1020.21	0.384435	0.120494	3.19048	0.00142035	0.029877
764	MSTRG.8821	1978.32	-0.345521	0.108305	-3.19024	0.00142153	0.029877
765	MSTRG.9631	514.677	-0.39596	0.124142	-3.18956	0.00142488	0.029877
766	MSTRG.11230	218.531	-0.491455	0.154461	-3.18174	0.00146391	0.0306283
767	MSTRG.21470	3058.49	0.264283	0.0830689	3.18149	0.00146522	0.0306283
768	MSTRG.19297	244.124	-0.458748	0.144356	-3.17791	0.00148343	0.0309687
769	MSTRG.9924	1760.6	0.485443	0.152778	3.17744	0.00148584	0.0309787
770	MSTRG.13655	783.516	-0.302576	0.0953304	-3.17397	0.00150368	0.0312696
771	MSTRG.15746	360.607	0.437733	0.137898	3.17433	0.00150181	0.0312696
772	MSTRG.15440	872.191	0.362077	0.114133	3.1724	0.00151184	0.0313985
773	MSTRG.12558	767.891	-0.43353	0.136744	-3.17038	0.00152241	0.0315436
774	MSTRG.7608	2139.6	0.375364	0.1184	3.17031	0.00152275	0.0315436
775	MSTRG.17654	49.8292	0.966876	0.305317	3.16679	0.00154131	0.0318459
776	MSTRG.2423	2688.56	1.07306	0.338836	3.1669	0.00154076	0.0318459
777	MSTRG.9731	314.249	-0.50798	0.160631	-3.16241	0.00156471	0.0322876
778	MSTRG.1856	122.45	-0.63369	0.200446	-3.1614	0.00157013	0.032358
779	MSTRG.21235	7000.26	0.33233	0.105164	3.16011	0.00157709	0.0324597
780	MSTRG.12341	357.558	0.425097	0.134557	3.15923	0.00158188	0.0325167
781	MSTRG.22952	549.577	0.371241	0.117583	3.15727	0.00159252	0.0326934
782	MSTRG.8233	1258.38	-0.336175	0.106513	-3.1562	0.00159842	0.0327726
783	MSTRG.7187	3525.75	0.295658	0.0937617	3.15329	0.00161441	0.0330583
784	MSTRG.19804	7745.61	-0.252718	0.0802426	-3.14943	0.00163589	0.0334554
785	MSTRG.13111	2891.97	0.314963	0.100119	3.14588	0.00165586	0.0338208
786	MSTRG.17336	360.115	0.496335	0.157826	3.14482	0.00166191	0.0338917
787	MSTRG.4340	53.6097	0.922714	0.293435	3.14453	0.00166355	0.0338917
788	MSTRG.11614	749.099	0.416098	0.132372	3.1434	0.00166998	0.0339796
789	MSTRG.15242	2161.08	0.313639	0.0999033	3.13943	0.0016928	0.0343567
790	MSTRG.23015	2769.16	0.470152	0.149746	3.13967	0.0016914	0.0343567
791	MSTRG.1662	289.338	-0.521296	0.166209	-3.1364	0.00171038	0.0346697
792	MSTRG.16358	687.498	-0.407142	0.129831	-3.13594	0.00171304	0.0346799
793	MSTRG.18859	813.28	-0.362189	0.115532	-3.13497	0.00171872	0.034751
794	MSTRG.10894	163.384	0.577856	0.184451	3.13285	0.0017312	0.0349594
795	MSTRG.16739	1170.27	-0.355772	0.113588	-3.13214	0.0017354	0.0349595
796	MSTRG.21356	336.247	-0.42559	0.13588	-3.13211	0.00173556	0.0349595
797	MSTRG.14456	538.908	-0.373805	0.119409	-3.13046	0.00174532	0.0350822
798	MSTRG.19255	25.224	-1.28351	0.410023	-3.13034	0.00174603	0.0350822
799	MSTRG.8891	438.15	0.618614	0.197673	3.12948	0.00175116	0.0351413
800	MSTRG.21316	83.6409	0.803336	0.25673	3.12911	0.00175339	0.0351422
801	MSTRG.3687	166.876	-0.584822	0.186969	-3.12792	0.00176049	0.0352406
802	MSTRG.5951	926.993	-0.340924	0.10908	-3.12545	0.00177533	0.0354933
803	MSTRG.12490	451.694	-0.378088	0.121006	-3.12453	0.00178088	0.0355224
804	MSTRG.23382	356.75	-0.484657	0.155116	-3.12448	0.00178121	0.0355224
805	MSTRG.4448	8370.88	-0.256575	0.0821279	-3.12409	0.00178354	0.0355248
806	MSTRG.10159	64.4414	-0.795959	0.254952	-3.12199	0.0017963	0.0356904
807	MSTRG.11185	889.048	-0.386009	0.123639	-3.12207	0.00179584	0.0356904
808	MSTRG.6113	160.136	-0.60954	0.195361	-3.12007	0.00180807	0.0358798
809	MSTRG.15010	266.55	0.489495	0.156915	3.11948	0.0018117	0.0359075
810	MSTRG.3935	913.099	0.416142	0.133501	3.11714	0.00182614	0.036149
811	MSTRG.4612	870.711	1.25384	0.402317	3.11656	0.00182977	0.0361762
812	MSTRG.21189	1176.57	0.384545	0.123418	3.1158	0.00183449	0.036225
813	MSTRG.21430	527.762	-0.34856	0.111915	-3.11451	0.0018425	0.0363204
814	SMESG000023758.1	182.345	0.501817	0.161133	3.1143	0.00184384	0.0363204
815	MSTRG.13447	319.695	-0.710223	0.228175	-3.11263	0.00185427	0.036481
816	MSTRG.17190	547.106	-0.34137	0.109804	-3.10889	0.00187792	0.0369009
817	MSTRG.20215	605.62	-0.398771	0.128483	-3.10369	0.00191122	0.0375094
818	SMESG000010523.1	35.5198	1.08391	0.349303	3.10306	0.00191528	0.0375432
819	MSTRG.742	1585.68	0.311206	0.100355	3.10106	0.0019283	0.0377523
820	MSTRG.14846	717.776	0.322321	0.103979	3.09988	0.00193601	0.0378571
821	MSTRG.1354	199.579	-0.537275	0.173409	-3.09831	0.00194628	0.0380117
822	MSTRG.14754	953.668	0.330961	0.106898	3.09603	0.00196128	0.038258
823	MSTRG.9966	484.933	0.788306	0.254688	3.09518	0.00196691	0.0383214
824	MSTRG.19307	408.85	0.368868	0.119219	3.09405	0.00197446	0.0384219
825	MSTRG.12761	30016.7	0.915791	0.29628	3.09096	0.00199511	0.0387297
826	MSTRG.20198	3388.27	0.415483	0.134405	3.09127	0.00199299	0.0387297
827	MSTRG.8784	65788.9	0.233335	0.0755483	3.08855	0.00201133	0.0389975
828	MSTRG.22520	517.97	0.390252	0.126458	3.08601	0.00202861	0.039285
829	MSTRG.18139	160.87	-0.675232	0.219054	-3.0825	0.00205273	0.0397043
830	MSTRG.9630	2116.25	-0.331356	0.107515	-3.08195	0.00205649	0.039729
831	MSTRG.13018	15298	0.250911	0.0815004	3.07864	0.00207947	0.0401248
832	MSTRG.4966	145.928	-0.565101	0.183646	-3.07712	0.00209009	0.0402813
833	MSTRG.15226	5676.85	0.253262	0.0824326	3.07235	0.00212379	0.0408327
834	MSTRG.3027	73.0007	-0.769515	0.25045	-3.07252	0.00212257	0.0408327
835	MSTRG.20313	6177.44	1.52481	0.496746	3.0696	0.00214349	0.041113
836	MSTRG.23667	11041	0.456663	0.148755	3.0699	0.00214131	0.041113
837	MSTRG.20129	3152.42	-0.286312	0.0934973	-3.06225	0.00219683	0.0420356
838	MSTRG.20335	446.144	-0.354491	0.115753	-3.06247	0.00219516	0.0420356
839	MSTRG.16565	139.32	-0.672432	0.219657	-3.06128	0.00220393	0.0420712
840	SMESG000078780.1	107.031	-0.67713	0.221181	-3.06144	0.00220278	0.0420712
841	MSTRG.5239	1159.66	-0.400362	0.130904	-3.05843	0.002225	0.0424231
842	MSTRG.6784	1182.48	-0.273641	0.0895401	-3.05607	0.00224256	0.0426713
843	MSTRG.9320	1529.42	0.373092	0.122086	3.05597	0.00224334	0.0426713
844	MSTRG.10725	4933.54	-0.288151	0.0943184	-3.05509	0.00224997	0.0427467
845	MSTRG.22121	1327.45	-0.256602	0.0842079	-3.04724	0.00230951	0.0438262
846	MSTRG.11148	616.87	-0.323398	0.106145	-3.04675	0.00231333	0.0438468
847	MSTRG.92	677.044	-0.370254	0.121626	-3.04421	0.00233293	0.0441662
848	MSTRG.21278	28.3286	-1.31037	0.430546	-3.04352	0.00233828	0.0442152
849	MSTRG.12601	39.9146	1.00533	0.330401	3.04276	0.00234419	0.0442228
850	MSTRG.8645	1663.44	-0.313673	0.103082	-3.04295	0.00234275	0.0442228
851	MSTRG.14234	601.964	0.368895	0.121299	3.04121	0.0023563	0.0443992
852	MSTRG.23425	67.7889	-0.784943	0.258248	-3.03949	0.00236979	0.044601
853	MSTRG.10720	67.4407	-0.855336	0.282061	-3.03244	0.00242581	0.0456019
854	MSTRG.19666	333.225	-0.398463	0.131551	-3.02896	0.00245396	0.0460556
855	MSTRG.8458	1444.48	-0.278789	0.0920477	-3.02875	0.00245569	0.0460556
856	MSTRG.20754	227.614	-0.469365	0.155105	-3.02612	0.00247711	0.0464033
857	MSTRG.20808	848.413	0.291051	0.0962123	3.02509	0.00248561	0.046454
858	MSTRG.3772	1754.04	-0.308818	0.102078	-3.02531	0.00248378	0.046454
859	MSTRG.12791	970.739	0.288299	0.0953447	3.02376	0.00249655	0.0466042
860	MSTRG.17372	2219.75	0.463516	0.153359	3.02241	0.00250767	0.0467574
861	MSTRG.15373	42.8891	-1.16719	0.386249	-3.02186	0.00251228	0.0467891
862	MSTRG.3960	1011.54	-0.303472	0.100456	-3.02095	0.00251983	0.0468752
863	MSTRG.19902	742.366	-0.467119	0.15507	-3.01231	0.00259271	0.0481752
864	MSTRG.3082	202.062	-0.517955	0.172113	-3.00939	0.0026177	0.0485483
865	MSTRG.7817	688.524	0.468799	0.155785	3.00926	0.00261884	0.0485483
866	MSTRG.488	416.926	-0.361896	0.12028	-3.00878	0.00262298	0.048569
867	MSTRG.14556	384.396	-0.53861	0.179393	-3.0024	0.00267857	0.0495413
868	MSTRG.17518	388.757	0.594621	0.198106	3.00152	0.00268631	0.0496272
869	MSTRG.20050	619.966	0.314785	0.104998	2.99802	0.00271743	0.0501172
870	MSTRG.2458	81.8919	-0.784103	0.261557	-2.99783	0.00271908	0.0501172
871	MSTRG.640	443.552	0.357272	0.119302	2.99467	0.00274738	0.0505808
872	MSTRG.20314	1053.51	1.41686	0.473285	2.99368	0.00275633	0.0506875
873	MSTRG.7733	6552.43	0.290501	0.0971193	2.99118	0.00277903	0.0510465
874	MSTRG.13566	272.09	-0.564893	0.18894	-2.9898	0.00279163	0.0511608
875	MSTRG.5390	1870.89	0.25194	0.0842573	2.99013	0.00278858	0.0511608
876	MSTRG.1121	476.818	0.450453	0.150729	2.98849	0.00280363	0.0513027
877	MSTRG.17961	527.49	-0.338544	0.113292	-2.98825	0.00280576	0.0513027
878	MSTRG.8099	144.533	-0.582565	0.194982	-2.98779	0.00281001	0.0513218
879	MSTRG.16116	25.6859	2.4245	0.811662	2.98708	0.00281654	0.0513826
880	MSTRG.21599	744.613	0.584127	0.195618	2.98606	0.00282599	0.0514965
881	MSTRG.13625	1916.36	-0.253414	0.0849194	-2.98417	0.00284347	0.0517563
882	MSTRG.1903	1285.01	0.506735	0.16986	2.98324	0.00285211	0.0518547
883	MSTRG.6080	264.73	0.453015	0.151936	2.98162	0.00286732	0.0520408
884	MSTRG.993	604.135	0.344324	0.115489	2.98145	0.00286883	0.0520408
885	MSTRG.14571	9804.34	-0.455343	0.152769	-2.9806	0.00287688	0.052128
886	MSTRG.23060	1596.66	-0.326159	0.109442	-2.98019	0.00288066	0.0521377
887	MSTRG.22764	1143.67	-0.350336	0.117628	-2.97833	0.00289827	0.0523973
888	MSTRG.12721	857.88	-0.299207	0.100509	-2.97691	0.00291167	0.0525668
889	MSTRG.19223	277.837	0.526095	0.176761	2.9763	0.00291747	0.0525668
890	MSTRG.6049	1113.4	-0.2957	0.0993403	-2.97663	0.00291431	0.0525668
891	MSTRG.18795	100.345	-0.812809	0.273481	-2.97208	0.00295788	0.0531757
892	MSTRG.7046	247.812	-0.483066	0.162522	-2.97231	0.00295564	0.0531757
893	MSTRG.6078	386.727	0.411042	0.13838	2.97039	0.00297418	0.0534089
894	MSTRG.6110	489.141	-0.387578	0.130604	-2.96758	0.0030015	0.0538391
895	MSTRG.20583	460.3	0.474837	0.160061	2.9666	0.00301116	0.0539522
896	MSTRG.12169	680.379	-0.354458	0.119634	-2.96284	0.00304817	0.0544331
897	MSTRG.6988	4021.69	0.246467	0.0831783	2.96311	0.00304543	0.0544331
898	MSTRG.8554	120.878	0.600598	0.202701	2.96298	0.00304681	0.0544331
899	MSTRG.10022	356.364	0.651211	0.219836	2.96226	0.00305386	0.0544741
900	MSTRG.11369	358.918	-0.393346	0.133023	-2.95698	0.00310672	0.0553555
901	MSTRG.16979	20508.7	0.265274	0.0897559	2.95551	0.00312155	0.0554965
902	MSTRG.1732	1600.87	0.348087	0.117775	2.95553	0.00312129	0.0554965
903	MSTRG.21629	991.904	0.300142	0.101583	2.95466	0.00313011	0.0555871
904	MSTRG.4533	985.78	-0.336863	0.11403	-2.95417	0.00313514	0.0556149
905	MSTRG.14386	1330.91	-0.39093	0.132385	-2.95298	0.00314723	0.0557677
906	MSTRG.4815	197.504	-0.509792	0.172729	-2.9514	0.00316341	0.0559927
907	MSTRG.16154	69.3834	-0.75638	0.256586	-2.94786	0.00319979	0.0565742
908	MSTRG.4252	405.266	-0.364892	0.123826	-2.94681	0.00321072	0.056705
909	MSTRG.3481	126.254	-0.556952	0.189031	-2.94635	0.00321551	0.0567272
910	MSTRG.11792	77.9368	-0.713098	0.24217	-2.94462	0.00323354	0.0569827
911	MSTRG.13103	760.371	-0.290621	0.0987143	-2.94406	0.00323938	0.0570231
912	MSTRG.2642	5074.8	1.30481	0.443743	2.94046	0.0032772	0.0575626
913	MSTRG.9242	260.653	-0.450218	0.153095	-2.94077	0.003274	0.0575626
914	MSTRG.21594	1763.03	-0.410867	0.139787	-2.93924	0.00329013	0.0577265
915	MSTRG.12243	517.625	-0.352951	0.120114	-2.93846	0.00329843	0.0578089
916	MSTRG.19347	446.601	0.395992	0.134945	2.93448	0.0033411	0.058493
917	MSTRG.14608	1140.58	0.491544	0.167529	2.93408	0.00334537	0.0585039
918	MSTRG.22625	5785.57	0.306262	0.104403	2.93346	0.00335203	0.0585565
919	MSTRG.2350	430.843	0.449003	0.153369	2.9276	0.00341588	0.0596072
920	MSTRG.4853	857.871	0.550655	0.18819	2.92606	0.00343284	0.059838
921	MSTRG.8828	808.396	-0.388341	0.13279	-2.92447	0.00345048	0.0600803
922	MSTRG.14503	2241.51	-0.410307	0.140344	-2.92358	0.00346027	0.0601854
923	MSTRG.7524	6167.16	0.230265	0.078838	2.92073	0.00349213	0.0606739
924	MSTRG.19595	1692.57	-0.24243	0.0830174	-2.92023	0.00349773	0.0607055
925	MSTRG.2643	4549.78	0.338191	0.115864	2.91887	0.00351308	0.060906
926	MSTRG.17020	33255.2	0.900944	0.309002	2.91566	0.00354937	0.0614688
927	MSTRG.12634	1190.77	-0.322148	0.110532	-2.91451	0.00356242	0.0616283
928	MSTRG.8719	120.656	-0.611661	0.209895	-2.91413	0.00356678	0.0616374
929	MSTRG.1475	7256.15	0.348286	0.119609	2.91188	0.00359262	0.0620113
930	MSTRG.9972	1369.22	-0.246865	0.0847875	-2.91157	0.00359615	0.0620113
931	MSTRG.10826	145.794	-0.573076	0.196914	-2.91028	0.00361108	0.0622021
932	MSTRG.19432	788.547	-0.394117	0.135441	-2.90988	0.00361563	0.0622137
933	MSTRG.12480	274.073	0.491851	0.169087	2.90887	0.00362741	0.0622163
934	MSTRG.15211	650.903	-0.335764	0.115401	-2.90953	0.00361971	0.0622163
935	MSTRG.9633	283.197	-0.393738	0.135347	-2.9091	0.00362471	0.0622163
936	MSTRG.1029	1999.43	0.265052	0.0911427	2.9081	0.00363628	0.0623019
937	MSTRG.22186	698.259	-0.30095	0.103504	-2.90763	0.00364182	0.0623303
938	MSTRG.20069	37.9973	-0.993024	0.341609	-2.9069	0.0036503	0.0624088
939	MSTRG.13451	723.762	-0.400943	0.138017	-2.90502	0.00367225	0.0627173
940	MSTRG.3526	56.3403	0.850713	0.293088	2.90259	0.0037009	0.0631394
941	MSTRG.7618	1305.77	-0.367489	0.126634	-2.90198	0.00370809	0.0631949
942	MSTRG.9081	309.818	-0.415796	0.143303	-2.90151	0.00371371	0.0632236
943	MSTRG.17249	989.823	0.276449	0.0952927	2.90104	0.00371921	0.0632502
944	MSTRG.10396	1091.95	-0.444972	0.153419	-2.90036	0.00372735	0.0633216
945	MSTRG.16810	1814.12	-0.310998	0.107254	-2.89962	0.00373611	0.0633364
946	MSTRG.4956	2444.94	-0.514906	0.177577	-2.89963	0.00373603	0.0633364
947	MSTRG.21028	893.525	0.302437	0.104381	2.89745	0.00376213	0.0637102
948	MSTRG.13060	71.8928	0.875443	0.302197	2.89693	0.00376836	0.0637484
949	MSTRG.3666	4013	0.264944	0.091567	2.89345	0.0038104	0.0643918
950	MSTRG.16395	2495.03	0.303774	0.105067	2.89124	0.00383728	0.0647778
951	MSTRG.518	613.111	0.442021	0.152965	2.88968	0.00385629	0.0649621
952	MSTRG.6810	353.685	0.379805	0.131426	2.88988	0.0038539	0.0649621
953	MSTRG.23386	1668.97	0.291753	0.101053	2.88712	0.00388789	0.0652889
954	MSTRG.6079	631.225	0.325077	0.112585	2.8874	0.00388434	0.0652889
955	MSTRG.9327	434.073	0.596796	0.206694	2.88735	0.00388507	0.0652889
956	MSTRG.23035	162.554	-0.50269	0.174181	-2.88602	0.00390148	0.0654486
957	MSTRG.21256	170.521	-0.603702	0.209378	-2.88331	0.00393525	0.0659462
958	MSTRG.12775	895.136	0.31541	0.109485	2.88086	0.00396593	0.0662861
959	MSTRG.2264	1456.65	0.424751	0.147421	2.88121	0.00396148	0.0662861
960	MSTRG.6627	1193.78	-0.293575	0.101916	-2.88057	0.00396955	0.0662861
961	MSTRG.6686	477.025	0.336497	0.116824	2.88037	0.00397205	0.0662861
962	MSTRG.14628	3365.28	0.263778	0.0916215	2.87899	0.00398947	0.0664387
963	MSTRG.1733	553.889	-0.350298	0.121666	-2.87917	0.00398719	0.0664387
964	MSTRG.8742	430.708	-0.464517	0.161445	-2.87726	0.0040115	0.0667363
965	MSTRG.15764	1347.13	-0.255942	0.0890101	-2.87542	0.00403486	0.0670555
966	MSTRG.14145	42.9969	1.78162	0.620172	2.87279	0.00406869	0.0675478
967	MSTRG.18809	781.313	-0.307335	0.107059	-2.87071	0.00409556	0.0679237
968	MSTRG.11231	372.459	-0.39198	0.136639	-2.86872	0.00412135	0.0681399
969	MSTRG.16338	1251.14	0.424511	0.147996	2.8684	0.00412558	0.0681399
970	MSTRG.20131	22.959	-1.29259	0.450582	-2.86872	0.00412139	0.0681399
971	MSTRG.23034	502.628	-0.329754	0.114937	-2.86901	0.0041176	0.0681399
972	MSTRG.14629	334.146	-0.372674	0.129992	-2.8669	0.00414511	0.0683921
973	MSTRG.2118	193.574	-0.498168	0.173917	-2.8644	0.00417804	0.0688648
974	MSTRG.22344	3120.24	-0.397777	0.138936	-2.86302	0.00419621	0.0690225
975	MSTRG.822	678.763	-0.355136	0.124032	-2.86326	0.004193	0.0690225
976	MSTRG.23315	1133.74	0.269968	0.0943269	2.86204	0.00420921	0.0691654
977	MSTRG.4417	103.114	-0.655815	0.229258	-2.86059	0.00422849	0.0694113
978	MSTRG.11751	2420.94	0.276749	0.0968205	2.85837	0.00425826	0.0695443
979	MSTRG.19352	98.6993	-1.24271	0.434617	-2.85932	0.00424548	0.0695443
980	MSTRG.20463	443.658	-0.497165	0.173932	-2.85838	0.00425806	0.0695443
981	MSTRG.7425	1690.84	-0.227651	0.0796273	-2.85895	0.00425043	0.0695443
982	MSTRG.7526	78.4323	1.04923	0.366915	2.8596	0.00424177	0.0695443
983	MSTRG.16854	735.64	-0.281171	0.0984074	-2.85721	0.00427378	0.069727
984	MSTRG.5079	524.136	-0.360432	0.126361	-2.8524	0.00433903	0.0707195
985	MSTRG.7807	886.427	0.317709	0.111465	2.85029	0.0043679	0.0710459
986	MSTRG.8761	234.386	-0.426187	0.14952	-2.85038	0.00436673	0.0710459
987	MSTRG.1221	800.334	-0.276516	0.0970293	-2.84982	0.00437439	0.0710794
988	MSTRG.18063	281.359	-0.411148	0.144447	-2.84636	0.00442228	0.0717848
989	MSTRG.11647	67.9074	0.77399	0.272143	2.84405	0.00445436	0.0722139
990	MSTRG.22220	1331.13	0.24597	0.0864931	2.84381	0.0044577	0.0722139
991	MSTRG.19720	792.181	-0.322836	0.113562	-2.84283	0.00447148	0.0723641
992	MSTRG.21692	398.458	-0.371428	0.130683	-2.84222	0.00448007	0.07243
993	MSTRG.8102	1483.56	0.371917	0.130939	2.84039	0.00450584	0.0727734
994	MSTRG.15354	30.6539	1.12252	0.395329	2.83947	0.00451891	0.0729112
995	MSTRG.11615	432.312	-0.354286	0.124826	-2.83824	0.00453627	0.0731037
996	MSTRG.4325	791.01	-0.321051	0.113136	-2.83774	0.0045434	0.0731037
997	MSTRG.8051	28147.2	0.316166	0.111418	2.83766	0.00454451	0.0731037
998	MSTRG.13731	561.654	0.314444	0.110868	2.83619	0.00456549	0.0731038
999	MSTRG.15450	705.724	0.334413	0.117924	2.83585	0.00457043	0.0731038
1000	MSTRG.16049	1661.03	0.32507	0.114633	2.83575	0.00457183	0.0731038
1001	MSTRG.2850	115.346	-0.611112	0.215392	-2.83721	0.00455103	0.0731038
1002	MSTRG.6266	1792.24	0.283102	0.0997896	2.83699	0.00455405	0.0731038
1003	MSTRG.9506	680.274	-0.345192	0.121694	-2.83657	0.00456015	0.0731038
1004	MSTRG.4460	1992.24	0.248251	0.0875705	2.83488	0.00458436	0.0732312
1005	MSTRG.18748	223.365	-0.501113	0.176969	-2.83164	0.00463095	0.0738113
1006	MSTRG.3290	792.28	0.490009	0.173063	2.8314	0.00463447	0.0738113
1007	MSTRG.3834	3386.52	-0.232905	0.0822397	-2.83203	0.00462537	0.0738113
1008	MSTRG.22532	226.53	-0.415057	0.146683	-2.82962	0.00466031	0.0741493
1009	MSTRG.23383	536.37	-0.353421	0.124935	-2.82883	0.00467179	0.0742584
1010	MSTRG.15027	6278.61	0.338295	0.119626	2.82793	0.00468498	0.0743208
1011	MSTRG.8648	1407.82	-0.359159	0.126992	-2.82821	0.00468087	0.0743208
1012	MSTRG.10946	966.258	0.265156	0.0937784	2.82747	0.00469168	0.0743537
1013	MSTRG.15518	467.037	0.344099	0.121816	2.82474	0.00473192	0.0749175
1014	MSTRG.15054	660.833	-0.444971	0.157575	-2.82387	0.00474481	0.0750094
1015	MSTRG.22503	498.115	-0.356529	0.126263	-2.82371	0.00474708	0.0750094
1016	MSTRG.13783	50.5723	-0.823554	0.291786	-2.82246	0.00476575	0.0750212
1017	MSTRG.14133	1433.27	-0.295723	0.104753	-2.82307	0.00475669	0.0750212
1018	MSTRG.16126	136.499	-0.533941	0.189192	-2.82222	0.00476922	0.0750212
1019	MSTRG.19339	744.183	-0.32331	0.114557	-2.82227	0.00476855	0.0750212
1020	MSTRG.7622	99.8011	-0.733998	0.26009	-2.82209	0.00477119	0.0750212
1021	MSTRG.17045	621.095	-0.309589	0.109766	-2.82044	0.00479571	0.0753331
1022	MSTRG.16516	614.759	0.535146	0.189784	2.81977	0.00480585	0.0754185
1023	MSTRG.18756	2016.24	0.402787	0.142883	2.819	0.00481732	0.0755247
1024	MSTRG.15014	857.561	-0.283781	0.100718	-2.81759	0.00483854	0.0757833
1025	SMESG000031049.1	50.5708	0.979723	0.347994	2.81534	0.00487254	0.0762415
1026	MSTRG.2759	388.861	0.368214	0.130899	2.81296	0.00490871	0.0767327
1027	MSTRG.22236	1056.75	-0.316971	0.112701	-2.8125	0.00491576	0.0767682
1028	MSTRG.18387	862.072	-0.325567	0.115771	-2.81217	0.00492092	0.076774
1029	MSTRG.9090	231.83	0.518482	0.184677	2.80751	0.00499268	0.077818
1030	MSTRG.16629	47.883	-0.880542	0.313807	-2.806	0.00501611	0.0780316
1031	MSTRG.172	2491.29	-0.220867	0.0787111	-2.80605	0.00501532	0.0780316
1032	MSTRG.16052	251.39	-0.429331	0.153023	-2.80567	0.00502125	0.0780359
1033	MSTRG.13206	168.928	0.466053	0.166151	2.80499	0.00503175	0.0781235
1034	MSTRG.2638	2717.16	1.10405	0.393733	2.80406	0.00504634	0.0782331
1035	MSTRG.282	290.718	0.44747	0.159587	2.80392	0.00504856	0.0782331
1036	MSTRG.10676	1478.33	-0.270145	0.0964215	-2.80171	0.00508325	0.0786947
1037	MSTRG.7450	44.5848	-1.08841	0.389049	-2.79762	0.00514807	0.0796215
1038	MSTRG.14129	632.842	0.438048	0.156622	2.79686	0.00516026	0.0797333
1039	MSTRG.16237	67.7283	-0.741053	0.265071	-2.79568	0.00517905	0.0799466
1040	MSTRG.15912	243.983	-0.443746	0.158758	-2.79511	0.00518825	0.0800117
1041	MSTRG.15401	359.909	-0.354128	0.126731	-2.79433	0.00520075	0.0801174
1042	MSTRG.1694	278.425	-0.518656	0.185628	-2.79406	0.00520508	0.0801174
1043	MSTRG.12045	2346.47	-0.240204	0.0860133	-2.79264	0.00522798	0.0803437
1044	MSTRG.21981	1095.35	-0.284528	0.101889	-2.79253	0.0052298	0.0803437
1045	MSTRG.19138	349.626	-0.382176	0.136987	-2.78987	0.00527299	0.0809299
1046	MSTRG.5171	27.1209	1.28255	0.460143	2.7873	0.00531497	0.0814962
1047	MSTRG.13167	132.08	-0.556264	0.199683	-2.78573	0.00534071	0.0818127
1048	MSTRG.1559	189.889	-0.4739	0.170166	-2.78493	0.00535398	0.0819378
1049	MSTRG.15396	66.879	-0.70905	0.25481	-2.78266	0.00539149	0.0824333
1050	MSTRG.15900	391.047	-0.340076	0.122229	-2.78229	0.00539776	0.0824506
1051	MSTRG.3184	28.6052	-1.07178	0.385338	-2.78141	0.0054124	0.0825957
1052	MSTRG.18505	13299	0.2152	0.0774328	2.77918	0.00544956	0.083005
1053	MSTRG.21683	201.727	-0.474927	0.170876	-2.77937	0.00544647	0.083005
1054	MSTRG.15144	404.165	-0.436193	0.157156	-2.77554	0.00551106	0.0837827
1055	MSTRG.16843	1794.11	-0.227763	0.0820608	-2.77554	0.00551106	0.0837827
1056	MSTRG.11324	270.34	-0.411818	0.148403	-2.77499	0.00552029	0.0837849
1057	MSTRG.13367	278.471	-0.603214	0.217381	-2.77491	0.00552164	0.0837849
1058	MSTRG.6791	430.928	0.357227	0.128865	2.7721	0.00556965	0.0844336
1059	MSTRG.21752	77.474	0.647764	0.233932	2.76903	0.00562242	0.0851532
1060	MSTRG.21396	55.7637	-0.83337	0.301109	-2.76767	0.00564594	0.0854287
1061	MSTRG.11311	80.1203	-0.683898	0.247297	-2.76549	0.00568371	0.0858385
1062	MSTRG.11377	59.451	0.757937	0.274046	2.76573	0.00567956	0.0858385
1063	MSTRG.1376	172.038	0.535319	0.193669	2.76409	0.00570811	0.086108
1064	MSTRG.6452	336.085	0.382138	0.138263	2.76386	0.00571228	0.086108
1065	MSTRG.6691	2216.02	-0.282739	0.102318	-2.76334	0.00572134	0.0861636
1066	MSTRG.1532	327.032	-0.383581	0.138874	-2.76208	0.00574348	0.0863363
1067	MSTRG.2465	278.002	-0.393062	0.142307	-2.76207	0.00574357	0.0863363
1068	MSTRG.10339	141.435	-0.520448	0.188481	-2.76128	0.0057575	0.0864128
1069	MSTRG.18599	198.757	-0.455072	0.164811	-2.76117	0.00575942	0.0864128
1070	MSTRG.3669	486.705	0.401005	0.145309	2.75966	0.00578613	0.0867325
1071	MSTRG.10479	6306.9	0.217247	0.0787383	2.7591	0.0057961	0.086801
1072	MSTRG.13012	2960.04	0.250603	0.0908546	2.75829	0.00581044	0.0869346
1073	MSTRG.8170	508.114	-0.324019	0.117496	-2.75772	0.00582069	0.0870068
1074	MSTRG.9985	1626.68	0.291384	0.105707	2.75654	0.00584171	0.0872398
1075	MSTRG.20829	3588.37	0.259893	0.0943904	2.75338	0.00589831	0.0880032
1076	MSTRG.15160	156.584	-0.557397	0.202577	-2.75152	0.00593185	0.0884215
1077	MSTRG.15593	127.696	-0.544178	0.197825	-2.75081	0.0059449	0.0885337
1078	MSTRG.12323	24.9154	1.17445	0.427154	2.74948	0.00596908	0.0888115
1079	MSTRG.17797	786.885	0.402238	0.146344	2.74858	0.00598538	0.0888893
1080	MSTRG.6646	216.352	0.445602	0.162114	2.74869	0.00598331	0.0888893
1081	MSTRG.12460	2615.41	0.20311	0.0739576	2.74631	0.00602705	0.0894254
1082	MSTRG.16059	488.752	-0.316	0.115088	-2.74573	0.0060377	0.089478
1083	MSTRG.23219	201.947	-0.490831	0.178776	-2.74551	0.00604174	0.089478
1084	MSTRG.10168	813.057	-0.320504	0.11678	-2.74451	0.00606008	0.0895843
1085	MSTRG.16896	2543.17	0.313256	0.114127	2.74479	0.00605492	0.0895843
1086	MSTRG.20791	323.446	-0.461067	0.16806	-2.74347	0.00607943	0.0897876
1087	MSTRG.13414	100.609	-0.639263	0.23313	-2.74209	0.00610504	0.090083
1088	MSTRG.553	1189.09	-0.274292	0.10016	-2.73855	0.00617115	0.0909748
1089	MSTRG.13112	2680.42	0.249481	0.091123	2.73785	0.00618419	0.0910835
1090	MSTRG.21195	138.262	-0.561364	0.205238	-2.73518	0.00623452	0.0917407
1091	MSTRG.9684	11338.8	-0.266426	0.0974252	-2.73468	0.00624416	0.0917983
1092	MSTRG.2402	51.3218	-0.840646	0.307689	-2.73213	0.00629262	0.092426
1093	MSTRG.13604	18335.9	0.381268	0.139622	2.73072	0.00631964	0.0927381
1094	MSTRG.1401	1379.69	-0.270347	0.0992873	-2.72287	0.00647167	0.0948824
1095	MSTRG.15697	321.003	0.368237	0.135349	2.72064	0.00651548	0.0953317
1096	MSTRG.17358	2325.33	-0.488293	0.179458	-2.72093	0.00650986	0.0953317
1097	MSTRG.2115	455.559	-0.330163	0.121365	-2.72041	0.00652013	0.0953317
1098	MSTRG.15669	243.375	-0.488179	0.179509	-2.71953	0.00653753	0.0954565
1099	MSTRG.1574	1210.91	-0.297631	0.109448	-2.71937	0.00654056	0.0954565
1100	MSTRG.396	347.987	0.420524	0.154717	2.71802	0.00656739	0.095761
1101	MSTRG.1152	804.939	0.314939	0.115938	2.71643	0.00659894	0.0961338
1102	MSTRG.14796	1067.52	0.405922	0.149538	2.71452	0.00663723	0.0966039
1103	MSTRG.1696	713.63	0.317351	0.116996	2.71251	0.00667767	0.0971045
1104	MSTRG.12372	219.6	-0.405119	0.149432	-2.71107	0.00670668	0.0974381
1105	MSTRG.10067	12169	0.410757	0.151544	2.71048	0.0067186	0.097523
1106	MSTRG.9755	882.722	-0.324901	0.119912	-2.7095	0.00673848	0.0977231
1107	MSTRG.19273	437.666	-0.338159	0.12491	-2.70722	0.00678498	0.0983088
1108	MSTRG.10428	841.239	-0.34802	0.128591	-2.70641	0.00680154	0.0983296
1109	MSTRG.11458	10364	-0.302769	0.111875	-2.70631	0.00680358	0.0983296
1110	MSTRG.8320	509.78	0.339407	0.125416	2.70625	0.0068048	0.0983296
1111	MSTRG.13790	1264.08	0.268708	0.0993316	2.70516	0.00682718	0.0985643
1112	MSTRG.11159	63.1256	-0.746654	0.276166	-2.70365	0.00685831	0.0989248
1113	MSTRG.2226	3891.28	-0.244429	0.0904641	-2.70194	0.00689361	0.0993447
1114	MSTRG.13482	418.736	0.32302	0.119591	2.70104	0.00691231	0.0995248
1115	MSTRG.21355	799.362	-0.517921	0.19182	-2.70004	0.00693317	0.0997358
1116	MSTRG.9839	672.465	0.333402	0.123496	2.69969	0.00694042	0.0997507
1117	MSTRG.20012	505.399	0.317185	0.117529	2.69879	0.00695927	0.0998428
1118	MSTRG.2538	473.768	0.322718	0.119578	2.6988	0.00695899	0.0998428
1119	MSTRG.13213	7903.34	0.304688	0.112937	2.69786	0.00697865	0.100031
1120	MSTRG.17329	52.4102	-0.887495	0.329064	-2.69703	0.00699604	0.100191
1121	MSTRG.4704	905.645	0.420859	0.156174	2.69482	0.00704273	0.10077
1122	MSTRG.19868	7031.15	-0.238788	0.0886335	-2.69411	0.00705771	0.100894
1123	MSTRG.15463	397.747	0.377385	0.140127	2.69316	0.00707785	0.101092
1124	MSTRG.12144	157.985	-0.520239	0.193489	-2.68873	0.00717246	0.102353
1125	MSTRG.1131	211.29	0.587844	0.218844	2.68613	0.00722843	0.102987
1126	MSTRG.18823	555.351	-0.373647	0.139118	-2.68583	0.00723502	0.102987
1127	MSTRG.8670	1407.03	-0.260663	0.0970531	-2.68578	0.00723614	0.102987
1128	MSTRG.19286	69.5478	-0.715946	0.267	-2.68145	0.00733044	0.103975
1129	MSTRG.23349	554.561	0.296865	0.110713	2.6814	0.00733148	0.103975
1130	MSTRG.5155	783.164	0.266263	0.0992873	2.68174	0.00732397	0.103975
1131	MSTRG.7561	1221.38	-0.237728	0.0886545	-2.68152	0.00732891	0.103975
1132	MSTRG.16706	335.817	0.372406	0.138965	2.67984	0.00736566	0.10415
1133	MSTRG.18941	226.143	0.488603	0.18228	2.68052	0.00735088	0.10415
1134	MSTRG.19204	766.13	-0.275554	0.102823	-2.67988	0.00736477	0.10415
1135	MSTRG.20032	1711.44	-0.243192	0.0907549	-2.67966	0.00736979	0.10415
1136	MSTRG.2047	177.956	-0.435316	0.162491	-2.67902	0.00738378	0.104256
1137	MSTRG.6224	1829.08	-0.261569	0.0976872	-2.67762	0.00741483	0.104602
1138	MSTRG.10893	125.64	0.525406	0.196459	2.67438	0.00748677	0.105525
1139	MSTRG.2925	279.04	-0.434676	0.162571	-2.67376	0.00750059	0.105587
1140	MSTRG.8606	744.783	0.384449	0.143795	2.67359	0.00750435	0.105587
1141	MSTRG.1640	905.799	-0.252705	0.0945453	-2.67285	0.00752103	0.105729
1142	MSTRG.16424	266.97	0.504929	0.188993	2.67168	0.0075473	0.106006
1143	MSTRG.20118	732.508	-0.304843	0.114116	-2.67134	0.00755499	0.106021
1144	MSTRG.5638	945.527	0.440699	0.164998	2.67094	0.00756397	0.106054
1145	MSTRG.20759	372.891	0.538484	0.201725	2.6694	0.00759864	0.106447
1146	MSTRG.12026	610.759	-0.311772	0.116837	-2.66844	0.00762042	0.106659
1147	MSTRG.10661	51.2644	-0.797234	0.298872	-2.66748	0.0076423	0.106762
1148	MSTRG.14813	1706.36	0.322758	0.121014	2.66712	0.00765046	0.106762
1149	MSTRG.19615	856.46	0.289055	0.108384	2.66695	0.00765433	0.106762
1150	SMESG000069191.1	74.6469	0.697448	0.261508	2.66703	0.00765254	0.106762
1151	MSTRG.12962	3166.43	0.841455	0.315802	2.66451	0.00771016	0.107447
1152	MSTRG.2904	438.88	-0.354589	0.133292	-2.66025	0.0078082	0.108719
1153	MSTRG.18719	85.1457	0.69242	0.260401	2.65905	0.0078361	0.109013
1154	MSTRG.3162	232.042	0.405	0.152362	2.65814	0.00785742	0.109215
1155	MSTRG.13232	4762.07	-0.337333	0.126947	-2.65728	0.00787748	0.109399
1156	MSTRG.10877	4145.94	0.199186	0.0749783	2.65658	0.00789372	0.10953
1157	MSTRG.23671	7263.06	0.243464	0.0916855	2.65543	0.00792085	0.109811
1158	MSTRG.13353	227.16	-0.397801	0.1499	-2.65377	0.00795983	0.11008
1159	MSTRG.15954	1071.64	0.244978	0.0922967	2.65424	0.0079487	0.11008
1160	MSTRG.7033	1246.81	-0.315036	0.118727	-2.65344	0.00796767	0.11008
1161	MSTRG.7378	132.055	-0.49657	0.187128	-2.65364	0.00796293	0.11008
1162	MSTRG.11524	1377.08	0.220861	0.083275	2.65219	0.00799724	0.110204
1163	MSTRG.18061	317.377	-0.39289	0.148126	-2.65241	0.00799188	0.110204
1164	SMESG000000671.1	59.4486	0.726755	0.274021	2.65219	0.00799723	0.110204
1165	MSTRG.21017	54.7539	-0.785284	0.296583	-2.64777	0.00810237	0.111557
1166	MSTRG.15013	743.467	0.504147	0.190551	2.64574	0.00815133	0.112135
1167	MSTRG.16749	1392.83	-0.268001	0.101335	-2.64471	0.00817607	0.112379
1168	MSTRG.21435	896.343	-0.282156	0.106788	-2.64221	0.00823673	0.113116
1169	MSTRG.13033	130.878	-0.502522	0.190327	-2.64031	0.00828302	0.113581
1170	MSTRG.20479	771.589	-0.281364	0.106568	-2.64024	0.00828472	0.113581
1171	MSTRG.16667	2165.23	0.421668	0.159856	2.6378	0.00834461	0.114304
1172	MSTRG.8750	1196.92	0.238877	0.0905731	2.6374	0.00835446	0.114341
1173	MSTRG.3494	107.978	-0.601977	0.228457	-2.63497	0.00841449	0.114906
1174	MSTRG.4471	606.668	0.381791	0.1449	2.63486	0.00841716	0.114906
1175	MSTRG.5658	66.0854	0.792528	0.300731	2.63534	0.00840534	0.114906
1176	MSTRG.5447	530.004	-0.378468	0.143687	-2.63398	0.00843895	0.115105
1177	MSTRG.10781	2315.49	-0.270681	0.102813	-2.63276	0.00846944	0.115423
1178	MSTRG.13520	513.851	-0.399914	0.151987	-2.63124	0.00850736	0.115842
1179	MSTRG.12840	1660.76	0.90881	0.345963	2.6269	0.00861663	0.116958
1180	MSTRG.18924	3806.01	-0.245527	0.0934792	-2.62654	0.0086258	0.116958
1181	MSTRG.22588	205.72	-0.442223	0.168362	-2.62662	0.00862386	0.116958
1182	MSTRG.8647	797.267	0.410902	0.156392	2.62739	0.00860427	0.116958
1183	MSTRG.8932	601.019	0.322844	0.122892	2.62704	0.00861305	0.116958
1184	MSTRG.13762	1509.97	0.300451	0.114417	2.62593	0.00864123	0.11697
1185	MSTRG.17605	333.269	0.331333	0.126175	2.62599	0.00863971	0.11697
1186	MSTRG.16243	1583.8	0.328644	0.125235	2.62422	0.00868488	0.117462
1187	MSTRG.7910	45.2032	0.84872	0.323537	2.62325	0.00870953	0.117696
1188	MSTRG.19350	313.863	0.390581	0.148918	2.6228	0.00872116	0.117754
1189	MSTRG.19445	21680.2	0.194025	0.0739877	2.6224	0.00873127	0.117791
1190	MSTRG.5337	443.531	-0.320966	0.12245	-2.62121	0.0087618	0.118005
1191	MSTRG.7389	374.247	0.415309	0.15843	2.62141	0.00875666	0.118005
1192	MSTRG.22484	321.292	-0.361127	0.137828	-2.62012	0.00878997	0.118186
1193	MSTRG.22730	11270.8	0.191941	0.0732492	2.62038	0.00878307	0.118186
1194	MSTRG.22736	184.605	-0.467006	0.178267	-2.61969	0.00880096	0.118235
1195	MSTRG.11752	806.233	0.293377	0.112017	2.61904	0.00881783	0.118261
1196	MSTRG.2416	4624.58	-0.241704	0.0922973	-2.61876	0.00882504	0.118261
1197	MSTRG.242	41.386	0.87684	0.334813	2.61889	0.00882154	0.118261
1198	MSTRG.163	725.887	0.598567	0.228904	2.61492	0.00892481	0.119441
1199	MSTRG.22950	3563.77	-0.227639	0.087058	-2.6148	0.00892796	0.119441
1200	MSTRG.12090	23164.1	0.203438	0.077818	2.61428	0.0089415	0.119523
1201	MSTRG.3841	404.372	0.59931	0.229293	2.61373	0.00895587	0.119615
1202	MSTRG.15961	1075.76	0.389911	0.149251	2.61245	0.00898958	0.119866
1203	MSTRG.6676	82.7724	0.613441	0.234803	2.61258	0.00898619	0.119866
1204	MSTRG.12476	467.592	0.376542	0.144182	2.61157	0.00901275	0.119995
1205	MSTRG.360	282.762	0.444955	0.170382	2.61152	0.00901418	0.119995
1206	MSTRG.18334	1598.84	0.286988	0.110028	2.60831	0.00909913	0.121025
1207	MSTRG.20632	58.7684	-0.723143	0.277451	-2.60638	0.00915047	0.121607
1208	MSTRG.6620	837.479	0.345779	0.13277	2.60435	0.00920492	0.12215
1209	MSTRG.9267	118.422	-0.588096	0.225818	-2.60429	0.00920652	0.12215
1210	MSTRG.6821	516.339	0.42311	0.162516	2.6035	0.00922779	0.122331
1211	MSTRG.700	1019.15	0.266734	0.102491	2.60251	0.00925442	0.122583
1212	MSTRG.15825	111.577	-0.595992	0.229082	-2.60166	0.00927745	0.122787
1213	MSTRG.6498	963.625	0.298111	0.11461	2.60108	0.0092931	0.122892
1214	MSTRG.20396	524.956	-0.391015	0.150347	-2.60074	0.00930218	0.122911
1215	MSTRG.17300	176.188	-0.43312	0.166678	-2.59855	0.00936193	0.123599
1216	MSTRG.18957	1312.72	-0.251247	0.0967122	-2.59788	0.00938012	0.123737
1217	MSTRG.2207	25.075	1.32344	0.509493	2.59757	0.00938866	0.123748
1218	MSTRG.4374	2629.11	0.297581	0.11461	2.59646	0.0094191	0.124048
1219	MSTRG.20170	151.77	-0.458448	0.176631	-2.59551	0.00944519	0.124188
1220	MSTRG.22603	300.637	0.341051	0.131395	2.59561	0.0094422	0.124188
1221	MSTRG.19052	957.147	0.305448	0.117701	2.59511	0.00945596	0.124227
1222	MSTRG.15135	3911.58	-0.315646	0.121647	-2.59477	0.00946551	0.124251
1223	MSTRG.20186	855.306	0.243567	0.0940509	2.58974	0.00960481	0.125977
1224	MSTRG.13853	430.835	-0.328361	0.126813	-2.58934	0.00961605	0.126021
1225	MSTRG.2601	163.442	-0.451631	0.174535	-2.58763	0.00966385	0.126544
1226	MSTRG.13054	684.594	0.307141	0.118816	2.58501	0.00973761	0.127406
1227	MSTRG.17532	34.6912	1.04284	0.403499	2.58449	0.00975239	0.127408
1228	MSTRG.18211	4511.67	0.22494	0.0870362	2.58444	0.0097536	0.127408
1229	MSTRG.3733	161.87	-0.479179	0.185433	-2.58412	0.00976291	0.127426
1230	MSTRG.18444	239.017	0.433809	0.168008	2.58207	0.00982094	0.127871
1231	MSTRG.6142	209.115	0.421161	0.163098	2.58225	0.00981584	0.127871
1232	MSTRG.7799	102.93	-0.535568	0.207391	-2.58241	0.00981121	0.127871
1233	MSTRG.789	297.601	0.412852	0.160134	2.57817	0.00993241	0.129218
1234	MSTRG.2570	67801.6	-0.184291	0.0714981	-2.57756	0.00995014	0.129239
1235	MSTRG.4979	1502.83	-0.248045	0.0962249	-2.57776	0.00994416	0.129239
1236	MSTRG.17079	1161.51	-0.259622	0.100812	-2.5753	0.0100152	0.129979
1237	MSTRG.7725	177.979	-0.469188	0.182331	-2.57327	0.0100742	0.130639
1238	MSTRG.15193	654.325	0.329405	0.128123	2.571	0.0101404	0.131391
1239	MSTRG.19765	1241.06	0.271631	0.105678	2.57036	0.0101592	0.131529
1240	MSTRG.18091	1787.29	-0.255559	0.0994427	-2.56991	0.0101726	0.131548
1241	MSTRG.19783	1022.53	-0.249257	0.0969965	-2.56975	0.0101771	0.131548
1242	MSTRG.2217	489.564	-0.329513	0.128281	-2.56867	0.0102089	0.13178
1243	MSTRG.7269	166.826	-0.584447	0.227537	-2.56859	0.0102114	0.13178
1244	MSTRG.6199	433.074	-0.328698	0.128049	-2.56698	0.0102589	0.132286
1245	MSTRG.16141	1985.58	-0.209475	0.0816226	-2.56638	0.0102766	0.132408
1246	MSTRG.7738	1814.54	0.252928	0.0986636	2.56353	0.0103613	0.133392
1247	MSTRG.9743	2871.31	0.206674	0.0806481	2.56266	0.0103872	0.133619
1248	MSTRG.16023	874.02	-0.298507	0.116564	-2.56087	0.010441	0.134203
1249	MSTRG.4595	169.096	-0.477881	0.186731	-2.55919	0.0104917	0.134746
1250	MSTRG.6767	360.224	-0.330147	0.129177	-2.55577	0.0105952	0.135967
1251	MSTRG.13216	1938.83	-0.231346	0.0905312	-2.55543	0.0106058	0.135994
1252	MSTRG.8521	325.966	0.352437	0.137933	2.55513	0.0106148	0.136002
1253	MSTRG.10684	98.9636	-0.637479	0.249547	-2.55454	0.0106327	0.136122
1254	MSTRG.15624	206.241	0.418427	0.164051	2.55059	0.0107539	0.137532
1255	MSTRG.2535	334.009	-0.318751	0.124984	-2.55034	0.0107619	0.137532
1256	MSTRG.6777	511.445	-0.339557	0.133153	-2.55012	0.0107685	0.137532
1257	MSTRG.3143	5668.35	0.192737	0.0755935	2.54965	0.0107831	0.137609
1258	MSTRG.18352	410.414	-0.368535	0.144729	-2.54638	0.0108846	0.138762
1259	MSTRG.5704	379.748	-0.354716	0.139313	-2.54619	0.0108907	0.138762
1260	MSTRG.8862	157.306	-0.452794	0.177867	-2.54569	0.0109063	0.13885
1261	MSTRG.10020	144.18	0.534739	0.210233	2.54356	0.010973	0.139588
1262	MSTRG.7569	152.105	0.514466	0.202467	2.54098	0.0110541	0.140509
1263	MSTRG.9000	25.7671	1.02812	0.405018	2.53845	0.0111343	0.141416
1264	MSTRG.14805	40.3044	-0.863762	0.340322	-2.53807	0.0111466	0.141461
1265	MSTRG.13316	258.25	-0.367423	0.144811	-2.53726	0.0111723	0.141674
1266	MSTRG.12559	237.853	-0.413701	0.163153	-2.53566	0.0112235	0.142099
1267	MSTRG.13292	87.6464	-0.581271	0.229219	-2.53587	0.0112168	0.142099
1268	MSTRG.11678	119.358	0.485868	0.191702	2.53449	0.011261	0.142125
1269	MSTRG.17606	678.407	0.396572	0.156459	2.53466	0.0112555	0.142125
1270	MSTRG.3134	4119.15	-0.180383	0.0711535	-2.53512	0.0112407	0.142125
1271	MSTRG.8464	81.8819	-0.591054	0.233195	-2.53459	0.0112579	0.142125
1272	MSTRG.17973	529.816	-0.440628	0.173877	-2.53413	0.0112726	0.14216
1273	MSTRG.16108	2076.99	0.976942	0.385715	2.53281	0.0113153	0.142586
1274	MSTRG.507	171.295	-0.491408	0.194085	-2.53192	0.0113441	0.142838
1275	MSTRG.22310	288.762	-0.381367	0.150764	-2.52956	0.0114204	0.143686
1276	MSTRG.15083	8115.65	0.215572	0.0852774	2.52789	0.0114749	0.144146
1277	MSTRG.9146	440.813	-0.286794	0.113451	-2.52791	0.0114743	0.144146
1278	MSTRG.5903	4604.55	0.397493	0.157293	2.52709	0.0115012	0.144363
1279	MSTRG.5392	619.614	-0.323522	0.128128	-2.52499	0.0115703	0.145117
1280	MSTRG.23449	555.249	-0.319604	0.126592	-2.52467	0.0115806	0.145133
1281	MSTRG.23144	15987.4	-0.221163	0.0876236	-2.52401	0.0116026	0.145182
1282	MSTRG.9913	28.941	-1.07756	0.426886	-2.52423	0.0115951	0.145182
1283	MSTRG.19332	286.874	-0.375423	0.148767	-2.52356	0.0116173	0.145253
1284	MSTRG.20940	1289.58	0.277483	0.109969	2.52327	0.0116268	0.145258
1285	MSTRG.14491	434.998	-0.367989	0.145868	-2.52275	0.0116442	0.145362
1286	MSTRG.5428	1143.54	-0.363175	0.143979	-2.52241	0.0116553	0.145387
1287	MSTRG.17653	5748.91	0.239454	0.0949469	2.52198	0.0116697	0.145454
1288	MSTRG.6185	908.408	-0.251285	0.0996765	-2.521	0.0117022	0.145746
1289	MSTRG.2720	147.833	0.889481	0.352998	2.51979	0.0117425	0.146134
1290	MSTRG.7940	23.9069	-1.08733	0.431702	-2.5187	0.011779	0.146476
1291	MSTRG.2578	34.7202	1.11609	0.4432	2.51824	0.0117942	0.146493
1292	MSTRG.8986	63.7166	0.785873	0.312089	2.51811	0.0117986	0.146493
1293	MSTRG.10007	33.0513	-0.914632	0.363308	-2.51751	0.0118187	0.146628
1294	MSTRG.21333	43.2439	-0.819121	0.325553	-2.51609	0.0118665	0.147003
1295	MSTRG.498	30.0108	-1.04248	0.41433	-2.51607	0.0118672	0.147003
1296	MSTRG.7816	156.571	-0.483454	0.192171	-2.51575	0.011878	0.147023
1297	MSTRG.18312	669.431	1.42631	0.567237	2.51449	0.0119204	0.147435
1298	MSTRG.13787	53.6863	-0.761171	0.302956	-2.51248	0.0119886	0.148164
1299	MSTRG.1578	452.289	-0.302734	0.120537	-2.51154	0.0120204	0.148186
1300	MSTRG.17728	731.208	0.524526	0.208871	2.51124	0.0120308	0.148186
1301	MSTRG.18009	153.855	0.527743	0.210098	2.51189	0.0120086	0.148186
1302	MSTRG.216	3836.07	-0.267072	0.106358	-2.51107	0.0120366	0.148186
1303	MSTRG.8707	995.432	0.276609	0.110138	2.51147	0.0120231	0.148186
1304	MSTRG.578	577.853	-0.368798	0.146917	-2.51024	0.0120648	0.148421
1305	MSTRG.22810	419.067	0.299461	0.119337	2.50937	0.0120945	0.148672
1306	MSTRG.3153	395.194	0.335231	0.133661	2.50808	0.0121391	0.149105
1307	MSTRG.2949	338.576	-0.351289	0.140246	-2.5048	0.0122521	0.150378
1308	MSTRG.14122	331.386	-0.317691	0.126872	-2.50404	0.0122785	0.150588
1309	MSTRG.4949	1151.68	0.235035	0.0938814	2.50353	0.0122963	0.15069
1310	MSTRG.10422	82.0494	-0.603624	0.241171	-2.50289	0.0123183	0.150838
1311	MSTRG.12785	183.586	0.400268	0.159967	2.50219	0.0123428	0.150838
1312	MSTRG.22020	1301.13	0.305868	0.122245	2.5021	0.0123459	0.150838
1313	MSTRG.23090	294.597	-0.346836	0.138605	-2.50233	0.0123378	0.150838
1314	MSTRG.5131	119.314	-0.577506	0.230887	-2.50125	0.0123757	0.151087
1315	MSTRG.12214	498.002	-0.291202	0.116455	-2.50055	0.0124001	0.151125
1316	MSTRG.1423	830.136	0.269035	0.107599	2.50035	0.0124071	0.151125
1317	MSTRG.21041	528.115	-0.272943	0.10916	-2.50039	0.0124058	0.151125
1318	MSTRG.18798	510.604	0.278357	0.111342	2.50003	0.0124185	0.151149
1319	MSTRG.20602	46.0795	1.17251	0.469167	2.49914	0.0124496	0.151413
1320	MSTRG.11192	113.246	0.874395	0.350129	2.49735	0.0125124	0.151937
1321	MSTRG.22389	162.644	-0.448185	0.179491	-2.49697	0.0125259	0.151937
1322	MSTRG.23254	962.354	-0.351729	0.14087	-2.49684	0.0125305	0.151937
1323	MSTRG.3181	272.452	-0.652817	0.261429	-2.49711	0.0125209	0.151937
1324	MSTRG.9636	994.247	-0.276483	0.110803	-2.49526	0.0125864	0.1525
1325	MSTRG.1491	58.018	-0.676373	0.27119	-2.4941	0.0126278	0.152886
1326	MSTRG.10966	133.898	-0.49544	0.198679	-2.49367	0.0126428	0.152953
1327	MSTRG.21927	316.984	-0.461029	0.184966	-2.4925	0.0126846	0.153272
1328	MSTRG.551	1312.46	0.305616	0.122619	2.4924	0.0126884	0.153272
1329	MSTRG.19391	387.354	-0.362285	0.145415	-2.49139	0.0127243	0.153476
1330	MSTRG.21465	86.994	-0.565453	0.226961	-2.49142	0.0127235	0.153476
1331	MSTRG.17324	2788.89	0.210013	0.0843138	2.49085	0.0127438	0.153596
1332	MSTRG.21797	106.227	-0.570478	0.229095	-2.49013	0.0127695	0.153675
1333	MSTRG.3572	229.595	-0.388592	0.15604	-2.49033	0.0127626	0.153675
1334	MSTRG.22451	964.587	-0.320296	0.128654	-2.48959	0.012789	0.153793
1335	MSTRG.22657	405.697	-0.322492	0.129636	-2.48766	0.0128587	0.154513
1336	MSTRG.5265	1048.95	0.241234	0.0969823	2.4874	0.0128681	0.154513
1337	MSTRG.15439	2847.46	-0.22366	0.0899781	-2.48571	0.0129292	0.155015
1338	MSTRG.3042	154.791	-0.468832	0.188608	-2.48575	0.012928	0.155015
1339	MSTRG.16367	96.3402	-0.547304	0.220312	-2.48423	0.0129832	0.155547
1340	MSTRG.5848	132.84	-0.515331	0.207914	-2.47857	0.013191	0.157918
1341	MSTRG.23124	31.4051	-0.979014	0.395037	-2.47828	0.0132016	0.157927
1342	MSTRG.6288	270.715	-0.362058	0.146115	-2.47791	0.0132156	0.157977
1343	MSTRG.10018	1632.82	0.262683	0.106093	2.47598	0.0132872	0.158715
1344	MSTRG.6296	1406.9	0.228727	0.092499	2.47275	0.0134079	0.160037
1345	MSTRG.11004	176.979	-0.434587	0.175798	-2.47209	0.0134327	0.160088
1346	MSTRG.12848	331.201	-0.31838	0.128792	-2.47206	0.0134339	0.160088
1347	MSTRG.8186	2196.04	-0.232969	0.0942495	-2.47184	0.013442	0.160088
1348	MSTRG.18492	143.331	-0.43478	0.175916	-2.47152	0.013454	0.160112
1349	MSTRG.20224	5833.35	0.209735	0.084893	2.47058	0.0134895	0.160296
1350	MSTRG.22667	13314.3	0.272118	0.110136	2.47074	0.0134833	0.160296
1351	MSTRG.1203	126.267	-0.47117	0.190753	-2.47005	0.0135093	0.160413
1352	MSTRG.11052	1089.86	0.26551	0.107518	2.46945	0.0135322	0.160567
1353	MSTRG.14940	300.212	-0.416388	0.168673	-2.46862	0.0135637	0.16071
1354	MSTRG.23303	884.902	0.250419	0.101442	2.4686	0.0135643	0.16071
1355	MSTRG.16339	159.675	-0.419017	0.169776	-2.46806	0.0135846	0.160811
1356	MSTRG.19744	2897.36	0.24449	0.0990701	2.46785	0.0135929	0.160811
1357	MSTRG.6670	135.442	-0.46337	0.187792	-2.46746	0.0136076	0.160866
1358	MSTRG.14892	442.145	0.336622	0.13646	2.46683	0.0136317	0.161032
1359	MSTRG.20630	3830.26	0.210852	0.0855012	2.46607	0.0136604	0.161253
1360	MSTRG.5308	44.3658	0.792506	0.321445	2.46545	0.0136843	0.161416
1361	MSTRG.11782	607.065	-0.292732	0.118754	-2.46503	0.0137003	0.161486
1362	MSTRG.18241	557.938	0.36325	0.147503	2.46266	0.013791	0.16226
1363	MSTRG.1947	1326.04	-0.378345	0.153617	-2.46291	0.0137813	0.16226
1364	MSTRG.20790	812.791	-0.319135	0.12962	-2.46207	0.0138136	0.16226
1365	MSTRG.2357	1325.96	0.304699	0.123761	2.462	0.0138165	0.16226
1366	MSTRG.5054	35708.3	0.19602	0.0796109	2.46222	0.013808	0.16226
1367	MSTRG.8069	537.879	-0.267267	0.108577	-2.46153	0.0138346	0.162354
1368	MSTRG.6748	606.471	-0.256701	0.104315	-2.46082	0.0138619	0.162556
1369	MSTRG.13084	42.3297	-1.08143	0.43969	-2.45953	0.013912	0.162906
1370	MSTRG.15992	97.9884	-0.565293	0.229834	-2.45957	0.0139104	0.162906
1371	MSTRG.17167	223.974	-0.532502	0.2166	-2.45845	0.0139537	0.163274
1372	MSTRG.13289	653.651	0.258002	0.104978	2.45769	0.0139835	0.163504
1373	MSTRG.4681	393.532	-0.363699	0.148032	-2.4569	0.0140141	0.163742
1374	MSTRG.9784	99.3687	-0.52073	0.212125	-2.45482	0.0140954	0.164573
1375	MSTRG.5552	376.867	0.315594	0.128605	2.45398	0.0141283	0.164837
1376	MSTRG.22275	356.34	-0.342989	0.139802	-2.45339	0.0141515	0.164988
1377	MSTRG.19479	322.372	0.410593	0.167595	2.44991	0.0142893	0.166474
1378	MSTRG.13135	284.698	-0.347135	0.141772	-2.44854	0.0143437	0.166908
1379	MSTRG.18503	1294.35	-0.303694	0.124035	-2.44845	0.0143474	0.166908
1380	MSTRG.8476	338.509	-0.313171	0.127926	-2.44805	0.0143631	0.16697
1381	MSTRG.11347	1630.8	-0.402645	0.164566	-2.44671	0.0144165	0.166986
1382	MSTRG.13644	397.035	0.35927	0.146781	2.44766	0.0143789	0.166986
1383	MSTRG.20136	57.6991	-0.76373	0.312097	-2.4471	0.0144013	0.166986
1384	MSTRG.3033	28.6335	0.939959	0.3841	2.44717	0.0143982	0.166986
1385	SMESG000054228.1	44.6444	0.865507	0.353721	2.44686	0.0144105	0.166986
1386	MSTRG.11696	121.605	-0.471635	0.192854	-2.44556	0.0144627	0.1674
1387	MSTRG.21544	153.534	-0.433617	0.177365	-2.44478	0.014494	0.167642
1388	MSTRG.10576	1010.65	0.225022	0.0920809	2.44375	0.0145356	0.168002
1389	MSTRG.11877	550.819	0.303382	0.124237	2.44196	0.0146078	0.168714
1390	MSTRG.21712	94.5699	-0.572595	0.234631	-2.44041	0.0146707	0.16932
1391	MSTRG.11993	185.214	-0.402201	0.164864	-2.43959	0.0147041	0.169461
1392	MSTRG.18982	41.0492	-0.808	0.331176	-2.43979	0.0146958	0.169461
1393	MSTRG.9103	258.897	0.401083	0.164508	2.43807	0.0147658	0.17005
1394	MSTRG.12211	156.838	-0.486118	0.199415	-2.43772	0.0147802	0.170094
1395	MSTRG.804	151.011	-0.456731	0.187458	-2.43644	0.0148325	0.170573
1396	MSTRG.15609	745.459	0.262844	0.107904	2.4359	0.0148548	0.170708
1397	MSTRG.3936	359.895	0.569583	0.233955	2.43459	0.0149088	0.171206
1398	MSTRG.15791	361.648	-0.322469	0.132501	-2.43372	0.0149447	0.171389
1399	MSTRG.2442	346.08	0.435204	0.178825	2.43368	0.0149461	0.171389
1400	MSTRG.8251	857.327	0.225162	0.0925932	2.43174	0.0150267	0.17219
1401	MSTRG.1107	345.448	-0.316935	0.130475	-2.42908	0.0151371	0.173332
1402	MSTRG.20770	2031.02	-0.188041	0.0774228	-2.42875	0.0151509	0.173367
1403	MSTRG.2986	597.797	-0.302181	0.124482	-2.42751	0.0152027	0.17372
1404	MSTRG.8101	38.5376	0.912309	0.375823	2.4275	0.0152035	0.17372
1405	MSTRG.14339	672.552	0.300624	0.12399	2.42459	0.0153256	0.174835
1406	MSTRG.23154	197.004	-0.421068	0.173659	-2.42468	0.0153217	0.174835
1407	MSTRG.6198	160.712	-0.452499	0.186644	-2.4244	0.0153337	0.174835
1408	MSTRG.13633	60.2674	-0.645514	0.266307	-2.42395	0.0153527	0.174927
1409	MSTRG.20199	693.46	0.274856	0.113405	2.42366	0.0153651	0.174944
1410	MSTRG.4597	4175.06	-0.227989	0.0941512	-2.42152	0.0154558	0.175852
1411	MSTRG.12115	2357.97	0.191987	0.0793154	2.42055	0.0154969	0.176007
1412	MSTRG.18346	650.963	0.247545	0.10228	2.42026	0.0155093	0.176007
1413	MSTRG.18637	526.478	0.278786	0.115197	2.42007	0.0155174	0.176007
1414	MSTRG.19958	189.693	-0.413039	0.170687	-2.41986	0.0155264	0.176007
1415	MSTRG.21609	734.254	0.253562	0.104793	2.41966	0.0155352	0.176007
1416	MSTRG.7466	39885	0.16733	0.0691357	2.42032	0.0155069	0.176007
1417	MSTRG.13456	200.886	-0.397222	0.164195	-2.41922	0.015554	0.176096
1418	MSTRG.16877	50.3394	0.986252	0.407822	2.41834	0.0155914	0.176271
1419	MSTRG.19575	288.592	-0.365119	0.150974	-2.41842	0.0155883	0.176271
1420	MSTRG.21607	654.401	0.308262	0.127491	2.41792	0.0156096	0.176352
1421	MSTRG.23555	726.36	-0.261656	0.108283	-2.4164	0.0156747	0.176963
1422	MSTRG.13082	98.778	0.58483	0.242126	2.41539	0.0157183	0.177331
1423	MSTRG.11096	1296.24	-0.363197	0.150449	-2.41408	0.0157748	0.177844
1424	MSTRG.15092	637.892	-0.267086	0.110666	-2.41345	0.0158024	0.177976
1425	MSTRG.23562	188.56	-0.44799	0.185634	-2.4133	0.0158088	0.177976
1426	MSTRG.17107	240.541	-0.371136	0.153828	-2.41266	0.0158364	0.178073
1427	MSTRG.17226	829.116	0.26925	0.111602	2.41259	0.0158395	0.178073
1428	MSTRG.6832	705.96	-0.415037	0.172049	-2.41233	0.0158511	0.178078
1429	MSTRG.15451	3188.74	0.346449	0.143756	2.40998	0.0159535	0.179103
1430	MSTRG.4919	2250.49	0.335339	0.139412	2.40538	0.0161555	0.181244
1431	MSTRG.19450	2156.27	-0.211442	0.0879505	-2.40411	0.016212	0.181546
1432	MSTRG.20580	653.114	-0.245544	0.102136	-2.4041	0.0162124	0.181546
1433	MSTRG.3189	227.708	0.489619	0.203668	2.40401	0.0162164	0.181546
1434	MSTRG.16019	1062.46	-0.237012	0.0986389	-2.40283	0.0162688	0.18188
1435	MSTRG.23666	37.591	0.794167	0.330505	2.40289	0.0162662	0.18188
1436	MSTRG.11648	362.287	0.400748	0.166841	2.40198	0.0163067	0.18205
1437	MSTRG.17123	36.1894	0.994071	0.41385	2.40201	0.0163053	0.18205
1438	MSTRG.7242	226.017	-0.403219	0.167994	-2.4002	0.016386	0.182808
1439	MSTRG.10298	91.1589	-1.05727	0.441515	-2.39464	0.0166365	0.185474
1440	MSTRG.18066	1060.43	-0.302347	0.126286	-2.39414	0.0166594	0.1856
1441	MSTRG.3322	1182.31	-0.300088	0.1255	-2.39114	0.0167963	0.186996
1442	MSTRG.14055	66.5347	-0.6073	0.254056	-2.39042	0.0168293	0.187141
1443	MSTRG.4517	354.447	0.321334	0.13443	2.39034	0.0168326	0.187141
1444	MSTRG.17452	531.856	-0.30973	0.129633	-2.38928	0.0168813	0.187512
1445	MSTRG.7914	546.598	0.329033	0.137722	2.38911	0.0168894	0.187512
1446	MSTRG.22286	390.092	-0.308235	0.129058	-2.38834	0.0169245	0.187772
1447	MSTRG.1408	30547	0.213946	0.0896268	2.38708	0.016983	0.188291
1448	MSTRG.12562	45.7244	-0.717713	0.300794	-2.38606	0.0170299	0.188526
1449	MSTRG.16147	322.613	0.348936	0.146267	2.3856	0.0170512	0.188526
1450	MSTRG.22150	473.201	-0.353685	0.148225	-2.38614	0.0170264	0.188526
1451	MSTRG.22499	7873.72	0.23608	0.09895	2.38585	0.0170396	0.188526
1452	MSTRG.4406	202.142	-0.367776	0.154186	-2.38527	0.0170665	0.188565
1453	MSTRG.16855	344.914	0.307668	0.129015	2.38475	0.0170908	0.188704
1454	MSTRG.21370	228.126	0.416442	0.174653	2.38439	0.0171073	0.188757
1455	MSTRG.17892	2583.97	0.391883	0.164451	2.38298	0.0171729	0.189221
1456	MSTRG.3856	545.87	0.261661	0.1098	2.38307	0.017169	0.189221
1457	MSTRG.22878	125.543	-0.555549	0.233347	-2.38078	0.0172758	0.190224
1458	MSTRG.18929	100.026	0.567389	0.23837	2.38028	0.0172993	0.190351
1459	MSTRG.22759	1856.55	0.428291	0.179973	2.37976	0.017324	0.190493
1460	MSTRG.10973	26996	-0.199995	0.0840535	-2.37938	0.0173417	0.190557
1461	MSTRG.9218	69.2027	-0.633779	0.266392	-2.37912	0.0173541	0.190562
1462	MSTRG.15520	557.543	-0.289921	0.121923	-2.37791	0.0174109	0.191032
1463	MSTRG.22338	1809.08	-0.216599	0.0910957	-2.37771	0.0174207	0.191032
1464	MSTRG.8507	1405.74	-0.223252	0.0939499	-2.37629	0.0174877	0.191636
1465	MSTRG.871	4067.09	0.210764	0.0887625	2.37447	0.0175742	0.192453
1466	MSTRG.4343	362.441	-0.29403	0.123892	-2.37328	0.0176308	0.192941
1467	MSTRG.1720	87.2066	-0.626803	0.264353	-2.37108	0.017736	0.19396
1468	MSTRG.925	1965.11	0.200827	0.0847256	2.37032	0.0177728	0.194231
1469	MSTRG.9100	211.426	-0.382691	0.161527	-2.3692	0.0178265	0.194684
1470	MSTRG.18366	227.42	0.410901	0.173526	2.36795	0.0178871	0.194949
1471	MSTRG.3471	867.704	-0.300778	0.12701	-2.36814	0.0178778	0.194949
1472	MSTRG.7621	335.172	-0.375409	0.158537	-2.36796	0.0178865	0.194949
1473	MSTRG.19602	26.2849	1.05497	0.445892	2.36599	0.0179821	0.195586
1474	MSTRG.2107	152.578	-0.407667	0.172299	-2.36605	0.0179791	0.195586
1475	MSTRG.23259	14877.6	0.192645	0.0814081	2.36641	0.0179613	0.195586
1476	MSTRG.11600	51.5131	-0.788801	0.333552	-2.36485	0.0180375	0.196055
1477	MSTRG.18157	398.226	-0.341854	0.144637	-2.36353	0.018102	0.196623
1478	MSTRG.18703	521.232	-0.311732	0.131922	-2.36301	0.0181273	0.196765
1479	MSTRG.22963	1888.56	0.193329	0.0818283	2.36262	0.0181462	0.196837
1480	MSTRG.15031	713.651	0.376153	0.159277	2.36162	0.0181951	0.196969
1481	MSTRG.16482	1871.24	0.276956	0.117257	2.36195	0.0181789	0.196969
1482	MSTRG.4475	3154.37	0.213673	0.090477	2.36163	0.0181946	0.196969
1483	MSTRG.23167	669.926	-0.247257	0.104724	-2.36102	0.0182246	0.197155
1484	MSTRG.5884	442.562	-0.328259	0.139059	-2.36058	0.0182466	0.19726
1485	MSTRG.13845	1037.6	-0.273125	0.115716	-2.36031	0.0182596	0.197268
1486	MSTRG.19259	131.135	-0.453631	0.192252	-2.35956	0.0182965	0.197302
1487	MSTRG.21020	1526.82	0.249979	0.105933	2.35978	0.0182857	0.197302
1488	MSTRG.22164	265.915	-0.340572	0.144341	-2.3595	0.0182997	0.197302
1489	MSTRG.21023	134.12	-0.449399	0.190526	-2.35873	0.0183374	0.197577
1490	MSTRG.9497	2484.3	0.185432	0.0786371	2.35808	0.0183699	0.197794
1491	MSTRG.12162	506.791	-0.303095	0.128587	-2.35711	0.0184178	0.198054
1492	MSTRG.17069	3088.59	0.200599	0.0851096	2.35694	0.0184261	0.198054
1493	MSTRG.5358	567.039	-0.293583	0.124566	-2.35684	0.0184311	0.198054
1494	MSTRG.4511	25.1809	-0.958747	0.40717	-2.35466	0.0185397	0.199088
1495	MSTRG.21840	261.086	-0.326138	0.138555	-2.35385	0.0185803	0.19939
1496	MSTRG.9112	87.3561	-0.521732	0.221725	-2.35306	0.0186196	0.199678
1497	MSTRG.6333	363.69	0.394282	0.167601	2.35251	0.0186471	0.19984
1498	MSTRG.12514	34.7186	-0.841071	0.357571	-2.35218	0.0186639	0.199887
1499	MSTRG.12520	897.855	-0.222607	0.0946579	-2.3517	0.0186877	0.199946
1500	MSTRG.5886	102.524	-0.534154	0.227147	-2.35157	0.0186943	0.199946
1501	MSTRG.13722	4754.56	0.318293	0.135431	2.35023	0.018762	0.200536
1502	MSTRG.6550	896.279	-0.328092	0.139683	-2.34883	0.0188326	0.201157
1503	MSTRG.15601	71.5016	-0.586979	0.249975	-2.34815	0.0188669	0.201389
1504	MSTRG.23055	160.831	-0.404942	0.172533	-2.34704	0.0189233	0.201746
1505	MSTRG.6959	494.06	-0.463865	0.197642	-2.347	0.0189255	0.201746
1506	MSTRG.7649	1786.28	0.201823	0.0860083	2.34655	0.0189482	0.201854
1507	MSTRG.9312	827.911	-0.259489	0.110668	-2.34476	0.0190395	0.202693
1508	MSTRG.11756	45.4681	-0.70269	0.299848	-2.34349	0.0191044	0.20298
1509	MSTRG.13620	1369.41	0.301185	0.128514	2.34359	0.0190991	0.20298
1510	MSTRG.8209	2561.21	-0.189846	0.0810023	-2.34372	0.0190927	0.20298
1511	MSTRG.16666	2283.25	0.410825	0.175369	2.34263	0.0191483	0.203213
1512	MSTRG.6352	342.922	-0.322444	0.137646	-2.34257	0.0191517	0.203213
1513	MSTRG.16689	3476.54	0.19408	0.0829252	2.34042	0.019262	0.204248
1514	MSTRG.17441	377.795	-0.294801	0.126054	-2.33869	0.0193513	0.204789
1515	MSTRG.6904	170.274	0.435818	0.186341	2.33881	0.0193451	0.204789
1516	MSTRG.8751	311.012	-0.347753	0.148668	-2.33912	0.0193291	0.204789
1517	MSTRG.10898	1903.74	0.268099	0.11467	2.338	0.0193874	0.205036
1518	MSTRG.10324	203.045	-0.418853	0.179172	-2.33771	0.0194021	0.205057
1519	MSTRG.2676	767.88	0.256708	0.109863	2.33662	0.019459	0.205523
1520	MSTRG.21669	1475.48	0.302711	0.12958	2.3361	0.019486	0.205673
1521	MSTRG.12321	52.6368	0.698431	0.299175	2.33452	0.0195683	0.20627
1522	MSTRG.16301	237.118	-0.350683	0.150215	-2.33454	0.0195675	0.20627
1523	MSTRG.11201	444.212	0.391057	0.167622	2.33297	0.0196499	0.206723
1524	MSTRG.7352	1482.95	0.240799	0.103207	2.33316	0.0196396	0.206723
1525	MSTRG.7858	268.934	0.342417	0.146757	2.33322	0.0196365	0.206723
1526	MSTRG.1153	8971.64	-0.172103	0.0737979	-2.33208	0.0196963	0.207075
1527	MSTRG.10440	2424.68	0.180381	0.0774698	2.3284	0.0198908	0.208732
1528	MSTRG.22652	101.599	-0.565869	0.243033	-2.32836	0.0198929	0.208732
1529	MSTRG.7462	1369.62	0.273952	0.117643	2.32867	0.0198764	0.208732
1530	SMESG000073961.1	27.2257	1.12673	0.484281	2.3266	0.0199865	0.209578
1531	MSTRG.7112	67.3968	0.605623	0.260334	2.32633	0.0200007	0.20959
1532	MSTRG.8317	190.536	-0.431667	0.185586	-2.32597	0.0200202	0.209657
1533	MSTRG.4641	292.84	0.343091	0.147535	2.32548	0.0200461	0.209791
1534	MSTRG.21525	1013.71	-0.224437	0.0965409	-2.32479	0.0200832	0.210043
1535	MSTRG.7556	149.217	-0.427366	0.183944	-2.32334	0.0201606	0.210715
1536	MSTRG.10313	2939.05	0.191314	0.0823724	2.32255	0.0202032	0.210921
1537	MSTRG.10884	423.499	0.35163	0.151402	2.32249	0.0202066	0.210921
1538	MSTRG.14082	1699.17	-0.213414	0.0919163	-2.32183	0.0202421	0.211017
1539	MSTRG.14429	74.3327	-0.648747	0.279397	-2.32195	0.0202354	0.211017
1540	MSTRG.15706	2004.52	0.209348	0.0902113	2.32064	0.0203063	0.211549
1541	MSTRG.7143	7970.31	0.21615	0.0931528	2.32038	0.0203202	0.211557
1542	MSTRG.13606	114.492	-0.475597	0.205039	-2.31954	0.0203656	0.211892
1543	MSTRG.22627	14844.6	0.189175	0.0815737	2.31907	0.0203912	0.212021
1544	MSTRG.7036	32.5273	-0.833706	0.359724	-2.31763	0.0204697	0.212699
1545	MSTRG.19226	78.9865	0.639614	0.276079	2.31678	0.020516	0.213042
1546	MSTRG.2572	976.601	-0.217925	0.0940836	-2.31629	0.0205425	0.21318
1547	MSTRG.18458	140.911	-0.420872	0.181726	-2.31597	0.0205601	0.213225
1548	MSTRG.10796	639.703	-0.319558	0.138042	-2.31493	0.020617	0.213677
1549	MSTRG.7711	847.802	0.244604	0.105688	2.31439	0.0206464	0.213844
1550	MSTRG.2241	3001.54	-0.226012	0.0977843	-2.31134	0.0208143	0.215444
1551	MSTRG.18938	3820.84	-0.28148	0.121804	-2.31093	0.0208368	0.215537
1552	MSTRG.4950	985.301	-0.451357	0.195374	-2.31021	0.0208763	0.215668
1553	MSTRG.5102	476.826	0.367823	0.159213	2.31026	0.0208738	0.215668
1554	MSTRG.13866	9833.12	0.327571	0.141813	2.30988	0.0208948	0.215721
1555	MSTRG.22974	34.8847	0.881552	0.381966	2.30794	0.0210027	0.216505
1556	MSTRG.73	1474.11	-0.236432	0.10245	-2.30778	0.0210113	0.216505
1557	MSTRG.7886	433.911	-0.293022	0.126955	-2.30808	0.0209948	0.216505
1558	MSTRG.3843	519.442	-0.281631	0.122054	-2.30743	0.0210306	0.216566
1559	MSTRG.6788	745.363	-0.294316	0.12759	-2.30674	0.0210696	0.216827
1560	MSTRG.21564	359.704	-0.312224	0.135369	-2.30647	0.0210846	0.216844
1561	MSTRG.13233	836.511	-0.33204	0.143993	-2.30594	0.0211141	0.217008
1562	MSTRG.7953	647.138	-0.299626	0.13002	-2.30446	0.0211967	0.217717
1563	MSTRG.23463	643.21	-0.257256	0.111647	-2.30419	0.0212119	0.217734
1564	MSTRG.13288	219.994	-0.362481	0.157346	-2.30372	0.0212385	0.217783
1565	MSTRG.17148	218.167	0.382681	0.166122	2.30362	0.0212438	0.217783
1566	MSTRG.22560	1583.29	1.0048	0.43686	2.30005	0.0214453	0.219568
1567	MSTRG.23691	12951.8	0.187279	0.0814209	2.30013	0.0214407	0.219568
1568	MSTRG.10578	195.68	-0.380338	0.16548	-2.29839	0.0215395	0.220392
1569	MSTRG.4057	72.1762	-0.72741	0.316557	-2.29788	0.0215687	0.22041
1570	MSTRG.9564	1382.47	-0.229211	0.0997469	-2.29792	0.0215662	0.22041
1571	SMESG000015755.1	21.7673	1.05495	0.459385	2.29644	0.021651	0.22111
1572	MSTRG.19065	143.471	-0.404298	0.176096	-2.29589	0.0216819	0.221223
1573	MSTRG.4104	72.8834	-0.899447	0.391786	-2.29576	0.0216896	0.221223
1574	MSTRG.1409	286.848	0.35982	0.156835	2.29425	0.0217759	0.221821
1575	MSTRG.21233	280.071	0.401356	0.174929	2.2944	0.0217677	0.221821
1576	MSTRG.19937	329.195	-0.308629	0.134659	-2.29193	0.0219097	0.222835
1577	MSTRG.22607	632.576	-0.285123	0.124389	-2.29219	0.0218946	0.222835
1578	MSTRG.23695	193.783	-0.381314	0.166414	-2.29137	0.0219423	0.222835
1579	MSTRG.2780	19821.3	0.190164	0.0829931	2.29132	0.0219448	0.222835
1580	MSTRG.7730	1730.81	0.210714	0.0919436	2.29177	0.0219187	0.222835
1581	MSTRG.3301	555.207	-0.244063	0.106559	-2.29039	0.0219985	0.223239
1582	MSTRG.15618	761.206	0.240338	0.104996	2.28901	0.0220787	0.223512
1583	MSTRG.17073	1836.18	-0.219935	0.0960846	-2.28897	0.0220811	0.223512
1584	MSTRG.20944	913.782	-0.338893	0.148026	-2.28941	0.0220556	0.223512
1585	MSTRG.671	474.678	-0.278167	0.121508	-2.2893	0.022062	0.223512
1586	MSTRG.12757	2633.64	0.275217	0.120274	2.28826	0.0221224	0.223765
1587	MSTRG.14836	232.12	-0.359195	0.156986	-2.28806	0.0221339	0.223765
1588	MSTRG.23323	2567.29	-0.228335	0.099814	-2.2876	0.0221606	0.223894
1589	MSTRG.1554	121.253	-0.562436	0.246056	-2.28581	0.0222656	0.224812
1590	MSTRG.237	272.518	-0.404669	0.177079	-2.28524	0.0222986	0.225004
1591	MSTRG.283	590.809	0.263205	0.115189	2.28498	0.0223141	0.22502
1592	MSTRG.12765	676.296	0.264026	0.115611	2.28374	0.022387	0.225612
1593	MSTRG.7961	385.474	0.536848	0.235108	2.28341	0.0224061	0.225664
1594	MSTRG.10897	72.1368	0.640831	0.280715	2.28286	0.0224389	0.225741
1595	MSTRG.8089	101.529	-0.493413	0.216143	-2.2828	0.0224419	0.225741
1596	MSTRG.12316	239.695	0.341838	0.149878	2.28078	0.0225616	0.226519
1597	MSTRG.14507	170.969	0.53893	0.236275	2.28095	0.0225517	0.226519
1598	MSTRG.2368	5542.29	-0.171921	0.0753697	-2.28103	0.0225466	0.226519
1599	MSTRG.16325	183.763	-0.460385	0.201933	-2.27989	0.0226143	0.226907
1600	MSTRG.12528	233.686	0.372209	0.16331	2.27915	0.022658	0.227203
1601	MSTRG.21188	419.633	-0.332606	0.146054	-2.27728	0.0227698	0.228181
1602	MSTRG.118	137.934	-0.445191	0.195539	-2.27674	0.022802	0.228361
1603	MSTRG.12901	178.388	-0.428143	0.188074	-2.27645	0.0228189	0.228388
1604	MSTRG.3377	78.9129	0.55237	0.242798	2.27502	0.0229048	0.229105
1605	MSTRG.3198	821.901	-0.219689	0.0965865	-2.27453	0.0229343	0.229115
1606	MSTRG.4845	192.896	0.400313	0.175992	2.27461	0.0229295	0.229115
1607	MSTRG.2916	364.215	0.29715	0.130685	2.27379	0.0229785	0.229413
1608	MSTRG.9143	412.119	-0.297984	0.131073	-2.27342	0.0230011	0.229496
1609	MSTRG.15615	41.7022	-0.729513	0.320969	-2.27284	0.0230356	0.229698
1610	MSTRG.4648	844.059	0.266049	0.117112	2.27174	0.023102	0.230217
1611	MSTRG.13937	77.0016	0.575709	0.253487	2.27116	0.0231375	0.230427
1612	MSTRG.2462	254.521	-0.333315	0.146777	-2.27089	0.0231534	0.230443
1613	MSTRG.17940	206.937	-0.399705	0.176081	-2.27	0.0232073	0.230836
1614	MSTRG.1186	29.2949	0.977208	0.430598	2.26942	0.0232428	0.231046
1615	MSTRG.1651	652.173	0.24512	0.108046	2.26865	0.0232893	0.231223
1616	MSTRG.23440	3975.93	0.182268	0.080339	2.26874	0.0232841	0.231223
1617	MSTRG.1955	408.236	0.468124	0.206592	2.26594	0.0234552	0.232725
1618	MSTRG.6769	123.005	-0.646043	0.285397	-2.26366	0.0235949	0.233967
1619	MSTRG.17832	256.898	-0.358711	0.158576	-2.26207	0.0236929	0.234714
1620	MSTRG.20363	1139.74	0.304897	0.134793	2.26197	0.0236995	0.234714
1621	MSTRG.3702	2093.45	0.217725	0.0962733	2.26154	0.0237261	0.234833
1622	MSTRG.4025	202.346	-0.395145	0.17478	-2.26081	0.023771	0.23504
1623	MSTRG.649	865.081	-0.365147	0.161518	-2.26072	0.0237763	0.23504
1624	MSTRG.23570	95.3224	0.662499	0.293159	2.25986	0.0238299	0.235425
1625	MSTRG.7372	931.943	-0.267499	0.118462	-2.2581	0.0239393	0.23636
1626	MSTRG.17597	141.918	0.442425	0.195993	2.25735	0.0239864	0.23668
1627	MSTRG.20225	128.602	-0.480762	0.213124	-2.25578	0.0240844	0.237355
1628	SMESG000006220.1	148.922	0.490226	0.217308	2.2559	0.0240768	0.237355
1629	MSTRG.6537	1905.31	-0.200324	0.0888142	-2.25554	0.0240995	0.237358
1630	MSTRG.7084	562.715	0.267532	0.118766	2.2526	0.0242846	0.239035
1631	MSTRG.2158	3299.44	0.173625	0.0771179	2.25143	0.0243583	0.239613
1632	MSTRG.6205	37.8105	-1.10817	0.492418	-2.25047	0.0244193	0.240066
1633	MSTRG.19225	2991.45	0.355384	0.158031	2.24883	0.0245233	0.24094
1634	MSTRG.643	550.097	0.296597	0.131949	2.24781	0.0245883	0.241431
1635	MSTRG.21829	2020.19	-0.24058	0.107065	-2.24704	0.0246373	0.241765
1636	MSTRG.1406	144.062	-0.454629	0.202368	-2.24655	0.024669	0.241928
1637	MSTRG.11923	6007.31	0.171814	0.076518	2.24541	0.024742	0.242474
1638	MSTRG.6941	39.2084	-0.744658	0.331665	-2.24521	0.0247548	0.242474
1639	MSTRG.19550	221.581	0.541907	0.24149	2.24402	0.0248311	0.242925
1640	MSTRG.6572	192.409	-0.443341	0.197565	-2.24403	0.0248308	0.242925
1641	MSTRG.21693	1012.68	0.278717	0.124231	2.24353	0.0248624	0.243082
1642	MSTRG.16933	1207.24	-0.225023	0.100315	-2.24316	0.0248865	0.24317
1643	MSTRG.17884	171.867	0.416548	0.185745	2.24258	0.0249237	0.243385
1644	MSTRG.988	2098.84	0.286659	0.127946	2.24047	0.0250602	0.24457
1645	MSTRG.17061	519.486	0.311114	0.138883	2.24012	0.0250831	0.244603
1646	MSTRG.9588	1234.06	-0.316828	0.141444	-2.23995	0.0250941	0.244603
1647	MSTRG.21948	583.547	0.24061	0.107476	2.23873	0.0251736	0.245229
1648	MSTRG.341	153.035	-0.435361	0.194582	-2.23741	0.0252594	0.245916
1649	MSTRG.16762	470.099	-0.361976	0.16182	-2.23691	0.0252923	0.246063
1650	MSTRG.22262	732.307	0.223713	0.10004	2.23624	0.0253358	0.246063
1651	MSTRG.4543	932.856	-0.296501	0.132569	-2.23658	0.0253136	0.246063
1652	MSTRG.7322	223.92	-0.325809	0.14568	-2.23647	0.0253213	0.246063
1653	MSTRG.13453	1598.14	-0.30712	0.137398	-2.23526	0.0254006	0.246096
1654	MSTRG.17698	165.381	0.369644	0.165334	2.23573	0.0253692	0.246096
1655	MSTRG.2283	35.9119	0.931755	0.416788	2.23556	0.0253805	0.246096
1656	MSTRG.3140	2664.73	0.216272	0.096749	2.23539	0.0253917	0.246096
1657	MSTRG.17306	551.838	-0.26362	0.118078	-2.2326	0.0255755	0.247492
1658	MSTRG.2550	156.297	-0.425963	0.190792	-2.23261	0.0255749	0.247492
1659	MSTRG.2688	66.7686	-0.615545	0.275838	-2.23154	0.0256452	0.248017
1660	MSTRG.15302	1896.11	0.196043	0.0878832	2.23072	0.0256997	0.248395
1661	MSTRG.9663	1961.49	0.243198	0.10905	2.23014	0.0257379	0.248614
1662	MSTRG.11595	35.9362	0.903743	0.405358	2.2295	0.025781	0.248731
1663	MSTRG.15251	1454.52	0.236749	0.106181	2.22968	0.0257688	0.248731
1664	MSTRG.2055	472.628	-0.281472	0.126305	-2.22851	0.0258465	0.249213
1665	MSTRG.14863	167.474	0.393979	0.176819	2.22815	0.0258704	0.249293
1666	MSTRG.2524	106.707	0.497179	0.223248	2.22702	0.0259457	0.24972
1667	MSTRG.4573	424.069	0.263489	0.11831	2.2271	0.0259406	0.24972
1668	MSTRG.5022	481	-0.267817	0.120275	-2.2267	0.0259672	0.249777
1669	MSTRG.7230	159.3	-0.413288	0.185784	-2.22457	0.0261104	0.251004
1670	MSTRG.2034	146.678	-0.413002	0.18577	-2.22319	0.0262032	0.251444
1671	MSTRG.20385	6337.4	-0.154971	0.0697017	-2.22335	0.0261922	0.251444
1672	MSTRG.23000	7121.53	0.232257	0.104462	2.22336	0.0261915	0.251444
1673	MSTRG.16363	1860.91	0.294253	0.132444	2.22172	0.0263022	0.252244
1674	MSTRG.14535	4637.44	0.182168	0.0820087	2.22132	0.0263292	0.252351
1675	MSTRG.22710	2005.01	0.324618	0.146155	2.22105	0.0263475	0.252377
1676	MSTRG.10232	419.963	0.327933	0.147716	2.22003	0.0264166	0.252888
1677	MSTRG.5518	406.595	-0.262917	0.118462	-2.21943	0.0264577	0.25313
1678	MSTRG.434	2157.14	-0.284344	0.128135	-2.2191	0.0264799	0.253192
1679	MSTRG.10383	1464.68	0.195931	0.0883419	2.21788	0.0265633	0.253799
1680	MSTRG.14699	320.689	-0.311233	0.140355	-2.21747	0.0265908	0.253799
1681	MSTRG.16573	176.634	0.393668	0.17752	2.2176	0.0265819	0.253799
1682	MSTRG.3811	383.922	0.293864	0.132707	2.21438	0.0268026	0.255668
1683	MSTRG.17854	65.3958	0.723038	0.326927	2.21162	0.0269928	0.257329
1684	MSTRG.20766	58.7067	-0.604927	0.273738	-2.20988	0.0271137	0.258328
1685	MSTRG.6506	134.674	0.468374	0.211979	2.20953	0.0271376	0.258403
1686	MSTRG.2975	344.608	-0.275966	0.12492	-2.20914	0.0271647	0.258414
1687	MSTRG.5339	1781.26	0.211203	0.0956079	2.20905	0.027171	0.258414
1688	MSTRG.8635	247.758	-0.379772	0.171942	-2.20872	0.0271944	0.258483
1689	MSTRG.9745	627.215	0.230026	0.10416	2.20839	0.0272168	0.258544
1690	MSTRG.19637	183.438	-0.454024	0.20565	-2.20776	0.0272613	0.258813
1691	MSTRG.10468	411.853	-0.405018	0.183486	-2.20735	0.0272894	0.258846
1692	MSTRG.1062	411.737	-0.263145	0.119219	-2.20724	0.027297	0.258846
1693	MSTRG.12463	284.558	-0.305215	0.138445	-2.2046	0.0274823	0.260449
1694	MSTRG.3475	463.766	-0.303797	0.137889	-2.2032	0.0275804	0.261225
1695	MSTRG.11849	1041.9	-0.26742	0.121426	-2.20233	0.0276424	0.261657
1696	MSTRG.23613	32.2877	-0.860628	0.391061	-2.20075	0.0277534	0.262554
1697	MSTRG.15204	246.14	-0.328381	0.149313	-2.19928	0.0278584	0.262927
1698	MSTRG.16524	212.453	-0.374558	0.170283	-2.19963	0.0278334	0.262927
1699	MSTRG.5012	361.259	-0.335315	0.152452	-2.19948	0.0278435	0.262927
1700	MSTRG.733	89.3301	-0.484605	0.220345	-2.1993	0.0278569	0.262927
1701	MSTRG.2412	422.772	-0.257602	0.117149	-2.19893	0.0278832	0.263006
1702	MSTRG.16681	1093.36	-0.202246	0.0919906	-2.19856	0.0279095	0.2631
1703	MSTRG.47	729.001	-0.276487	0.12586	-2.19678	0.0280361	0.264139
1704	MSTRG.21987	759.888	0.220336	0.100322	2.19628	0.028072	0.264322
1705	MSTRG.376	4291.7	-0.189129	0.0861227	-2.19604	0.0280888	0.264324
1706	MSTRG.12465	148.788	0.378109	0.172276	2.19478	0.0281794	0.264528
1707	MSTRG.2065	31.4594	0.812942	0.370429	2.19459	0.0281928	0.264528
1708	MSTRG.21870	1719	0.252386	0.114982	2.195	0.0281637	0.264528
1709	MSTRG.7555	127.917	-0.43886	0.199943	-2.19493	0.0281686	0.264528
1710	MSTRG.8437	148.191	-0.410349	0.186918	-2.19534	0.0281391	0.264528
1711	MSTRG.1187	4430.85	0.185954	0.0847912	2.19309	0.0283012	0.265197
1712	MSTRG.14253	540.619	-0.243774	0.111144	-2.19331	0.0282849	0.265197
1713	MSTRG.15652	68.8784	0.768196	0.350309	2.19291	0.0283136	0.265197
1714	MSTRG.14102	210.71	-0.550128	0.250924	-2.19241	0.0283502	0.26523
1715	MSTRG.18604	603.88	0.252802	0.115302	2.19252	0.0283421	0.26523
1716	MSTRG.15673	96.2543	0.499567	0.227891	2.19213	0.0283699	0.265259
1717	MSTRG.15703	2088.67	-0.186949	0.0853912	-2.18933	0.0285728	0.266859
1718	MSTRG.17456	524.528	0.279935	0.127864	2.18931	0.0285742	0.266859
1719	MSTRG.11856	393.778	-0.272689	0.124652	-2.1876	0.0286988	0.267556
1720	MSTRG.3063	211.975	-0.385983	0.176432	-2.18771	0.0286907	0.267556
1721	MSTRG.5144	455.662	0.389593	0.178072	2.18784	0.0286811	0.267556
1722	MSTRG.16086	902.33	0.222064	0.101542	2.18691	0.0287489	0.267712
1723	MSTRG.5599	2093.16	0.190972	0.0873182	2.18708	0.0287364	0.267712
1724	MSTRG.14696	147.812	-0.405317	0.185406	-2.18611	0.0288078	0.268104
1725	MSTRG.17250	376.901	-0.297331	0.136197	-2.1831	0.0290284	0.269066
1726	MSTRG.3474	458.054	-0.264634	0.121149	-2.18436	0.0289358	0.269066
1727	MSTRG.4412	200.418	-0.381732	0.174851	-2.18318	0.0290225	0.269066
1728	MSTRG.5157	1067.42	0.21646	0.0991054	2.18413	0.0289524	0.269066
1729	MSTRG.6318	268.758	-0.330171	0.151233	-2.18319	0.0290217	0.269066
1730	MSTRG.6492	740.53	-0.228298	0.104538	-2.18388	0.028971	0.269066
1731	MSTRG.8052	1271.77	-0.330941	0.151586	-2.18319	0.029022	0.269066
1732	MSTRG.22799	114.116	-0.532124	0.244068	-2.18023	0.0292406	0.270876
1733	MSTRG.3787	379.653	-0.324517	0.14887	-2.17987	0.0292673	0.270967
1734	MSTRG.19596	232.088	-0.399767	0.18351	-2.17845	0.0293726	0.271785
1735	MSTRG.21300	910.577	-0.227009	0.10428	-2.17693	0.0294861	0.272351
1736	MSTRG.3903	51.3106	-0.676324	0.310708	-2.17672	0.0295016	0.272351
1737	MSTRG.4051	9785.85	-0.207964	0.095538	-2.17677	0.0294981	0.272351
1738	MSTRG.8746	1654.2	0.187733	0.0862443	2.17677	0.0294981	0.272351
1739	MSTRG.17221	1778.47	0.213824	0.0982996	2.17523	0.0296129	0.273221
1740	MSTRG.20958	91.3411	-0.677028	0.311277	-2.175	0.0296299	0.273222
1741	MSTRG.17425	1232.15	0.212374	0.0977015	2.17371	0.0297273	0.273962
1742	MSTRG.5414	80.9205	-0.636169	0.292944	-2.17164	0.0298826	0.275236
1743	MSTRG.9227	4411.45	0.153968	0.0709181	2.17107	0.029926	0.275478
1744	MSTRG.23318	28.3867	-0.913098	0.420645	-2.17071	0.029953	0.275568
1745	MSTRG.10429	262.787	0.310041	0.142888	2.16982	0.0300204	0.276011
1746	MSTRG.1130	316.159	0.333191	0.153571	2.16962	0.0300356	0.276011
1747	MSTRG.13930	410.831	-0.305122	0.140717	-2.16833	0.0301333	0.276751
1748	MSTRG.17215	94.7271	-0.772202	0.356373	-2.16684	0.0302473	0.277638
1749	MSTRG.3036	470.399	-0.291143	0.13438	-2.16656	0.0302682	0.277671
1750	MSTRG.21685	92.4297	-0.510679	0.235788	-2.16584	0.0303234	0.27802
1751	MSTRG.11817	344.764	0.386842	0.178901	2.16233	0.030593	0.280271
1752	MSTRG.19254	298.569	-0.356972	0.165132	-2.16173	0.0306388	0.280271
1753	MSTRG.23385	80.6961	0.537455	0.248599	2.16194	0.030623	0.280271
1754	MSTRG.9703	679.528	-0.342515	0.158424	-2.16201	0.0306173	0.280271
1755	MSTRG.5389	350.732	-0.299146	0.138415	-2.16123	0.0306773	0.280303
1756	MSTRG.7019	998.84	-0.282123	0.130527	-2.16143	0.0306625	0.280303
1757	MSTRG.1882	1431.69	0.20534	0.0950815	2.15963	0.0308017	0.28123
1758	MSTRG.5116	23.1284	-0.938667	0.434675	-2.15947	0.0308137	0.28123
1759	MSTRG.14962	159.015	-0.575491	0.266654	-2.15819	0.0309129	0.281975
1760	MSTRG.13719	117.89	-0.450105	0.208733	-2.15637	0.0310546	0.282946
1761	MSTRG.14724	723.545	0.370811	0.171945	2.15656	0.0310396	0.282946
1762	MSTRG.10507	131.616	-0.464204	0.215306	-2.15602	0.031082	0.283035
1763	MSTRG.15249	35.9154	0.837941	0.388921	2.15452	0.0311991	0.283077
1764	MSTRG.16554	30.7048	-0.81519	0.378209	-2.1554	0.0311307	0.283077
1765	MSTRG.19964	420.155	0.378057	0.175483	2.15438	0.03121	0.283077
1766	MSTRG.22022	1174.18	0.218505	0.101415	2.15457	0.0311957	0.283077
1767	MSTRG.2822	40.8272	-0.762807	0.353996	-2.15485	0.0311737	0.283077
1768	MSTRG.3710	774.302	0.225651	0.104726	2.15467	0.0311873	0.283077
1769	MSTRG.3740	126.151	-0.440247	0.204329	-2.1546	0.0311929	0.283077
1770	MSTRG.2136	157.795	-0.45453	0.211066	-2.1535	0.0312793	0.283545
1771	MSTRG.21065	378.692	-0.273715	0.127189	-2.15204	0.0313945	0.284429
1772	MSTRG.13549	749.093	-0.275006	0.127804	-2.15178	0.031415	0.284454
1773	MSTRG.11531	29625	-0.138715	0.0644908	-2.15093	0.0314821	0.28474
1774	MSTRG.11999	6276.86	-0.216697	0.100739	-2.15109	0.0314694	0.28474
1775	MSTRG.17599	70.0746	0.555912	0.258516	2.1504	0.0315239	0.284958
1776	MSTRG.7354	110.912	-0.486324	0.226234	-2.14965	0.0315832	0.285333
1777	MSTRG.1989	169.565	0.373095	0.173594	2.14923	0.0316161	0.285469
1778	MSTRG.17850	923.135	-0.297743	0.138611	-2.14804	0.0317106	0.286162
1779	MSTRG.10590	84.7714	-0.52596	0.245037	-2.14645	0.0318371	0.286741
1780	MSTRG.15741	149.262	-0.407013	0.189631	-2.14634	0.0318462	0.286741
1781	MSTRG.18643	246.363	0.356576	0.166109	2.14665	0.0318215	0.286741
1782	SMESG000054857.1	60.8835	0.562794	0.262132	2.14699	0.031794	0.286741
1783	MSTRG.16081	1152.47	-0.196173	0.091445	-2.14525	0.0319327	0.287037
1784	MSTRG.7920	1012.32	-0.347646	0.162033	-2.14552	0.031911	0.287037
1785	MSTRG.8584	334.972	-0.280287	0.130645	-2.14541	0.0319202	0.287037
1786	MSTRG.5433	346.688	-0.340473	0.158776	-2.14436	0.0320043	0.287519
1787	MSTRG.2946	4027.5	0.215375	0.1005	2.14303	0.0321107	0.288314
1788	MSTRG.19080	92.4319	0.511614	0.238774	2.14267	0.0321394	0.28841
1789	MSTRG.2554	451.034	-0.306194	0.142955	-2.14188	0.032203	0.28882
1790	MSTRG.4592	2691.33	0.225329	0.105258	2.14072	0.0322965	0.28944
1791	MSTRG.5484	38.2833	-0.698504	0.32635	-2.14035	0.0323263	0.28944
1792	MSTRG.6287	74.8979	-0.755194	0.352801	-2.14057	0.032309	0.28944
1793	MSTRG.2066	4013.29	0.185269	0.0865973	2.13943	0.032401	0.289947
1794	MSTRG.2611	1223.3	0.193975	0.0907266	2.13802	0.032515	0.290805
1795	MSTRG.12560	310.758	-0.314303	0.147039	-2.13756	0.0325528	0.290982
1796	MSTRG.18696	2500.01	-0.176786	0.0827271	-2.13698	0.0326	0.291241
1797	MSTRG.2863	211.783	-0.379199	0.177494	-2.1364	0.0326467	0.291496
1798	MSTRG.8350	393.118	-0.278435	0.13036	-2.13589	0.0326883	0.291705
1799	MSTRG.9420	42.85	0.698582	0.327385	2.13382	0.0328575	0.293052
1800	MSTRG.2715	1291.34	-0.181633	0.0851334	-2.13351	0.0328826	0.293113
1801	MSTRG.22255	1854.13	0.209402	0.098198	2.13244	0.0329705	0.293734
1802	MSTRG.13437	118.9	-0.454397	0.213153	-2.13179	0.0330243	0.29405
1803	MSTRG.12226	235.962	-0.328681	0.154202	-2.1315	0.0330479	0.294097
1804	MSTRG.617	442.645	-0.301889	0.141737	-2.12992	0.0331781	0.295092
1805	MSTRG.5117	49.685	-0.672036	0.315648	-2.12906	0.033249	0.295559
1806	MSTRG.10594	1971.4	0.202564	0.0951712	2.12841	0.0333027	0.295873
1807	MSTRG.1387	45.4753	-0.725272	0.340846	-2.12786	0.0333486	0.295873
1808	MSTRG.1683	66.0488	-0.6783	0.318776	-2.12782	0.0333518	0.295873
1809	MSTRG.20672	15799.2	0.172827	0.0812255	2.12775	0.033358	0.295873
1810	MSTRG.13318	105.833	-0.512724	0.241041	-2.12712	0.0334098	0.296168
1811	MSTRG.14934	367.582	-0.315529	0.148379	-2.1265	0.0334617	0.296465
1812	MSTRG.11666	4831.67	-0.206186	0.0970019	-2.12559	0.0335375	0.296645
1813	MSTRG.15972	330.747	-0.285922	0.134509	-2.12568	0.0335303	0.296645
1814	MSTRG.6385	237.178	-0.389958	0.183435	-2.12587	0.0335142	0.296645
1815	MSTRG.17238	1213.87	0.203672	0.095878	2.12428	0.0336464	0.297363
1816	MSTRG.2621	63.8825	-0.601535	0.283215	-2.12395	0.0336742	0.297363
1817	MSTRG.8738	134.276	-0.408432	0.192287	-2.12408	0.0336636	0.297363
1818	MSTRG.9794	221.207	-0.483044	0.227492	-2.12335	0.0337247	0.297645
1819	MSTRG.16532	188.558	0.343287	0.161691	2.12311	0.033745	0.297661
1820	MSTRG.16298	2171.09	0.373984	0.176226	2.12218	0.0338229	0.297931
1821	MSTRG.17687	696.158	-0.25562	0.120458	-2.12208	0.0338313	0.297931
1822	MSTRG.6648	619.613	0.228414	0.107617	2.12246	0.0337987	0.297931
1823	MSTRG.12223	1423.53	-0.233511	0.110059	-2.1217	0.0338632	0.298048
1824	MSTRG.7619	2824.12	-0.178242	0.0840882	-2.1197	0.034031	0.299361
1825	MSTRG.2070	172.604	-0.449204	0.211978	-2.11911	0.0340814	0.29964
1826	MSTRG.20758	336.022	0.329059	0.155304	2.1188	0.0341072	0.299703
1827	MSTRG.21395	1345.29	0.191036	0.0901828	2.11832	0.0341481	0.299898
1828	MSTRG.4849	640.309	-0.231649	0.10944	-2.11668	0.0342873	0.300791
1829	MSTRG.7070	56.0195	0.590885	0.279143	2.11678	0.0342784	0.300791
1830	MSTRG.21151	211.294	0.316713	0.149666	2.11613	0.0343336	0.301033
1831	MSTRG.14675	559.764	-0.292151	0.13811	-2.11535	0.0344002	0.301452
1832	MSTRG.10372	215.978	-0.363155	0.17173	-2.11468	0.034457	0.301702
1833	MSTRG.7245	287.026	0.308427	0.145858	2.11457	0.0344663	0.301702
1834	MSTRG.7851	2736.97	0.170225	0.0805438	2.11345	0.0345621	0.302376
1835	MSTRG.20364	196.415	-0.34971	0.165486	-2.11323	0.034581	0.302376
1836	MSTRG.9865	530.061	0.353567	0.167457	2.11139	0.0347386	0.303589
1837	MSTRG.5899	34998.2	0.159772	0.0756866	2.11097	0.0347749	0.303741
1838	MSTRG.10948	29.5107	0.853345	0.404427	2.11001	0.0348574	0.304131
1839	MSTRG.1218	47.7328	0.73578	0.348699	2.11008	0.0348518	0.304131
1840	MSTRG.4313	821.258	-0.209236	0.0992083	-2.10905	0.03494	0.304558
1841	MSTRG.936	256.173	0.313408	0.148605	2.109	0.0349443	0.304558
1842	MSTRG.7855	2777.04	0.232289	0.110154	2.10877	0.0349643	0.304567
1843	MSTRG.11990	200.321	-0.366714	0.174089	-2.10648	0.0351629	0.305965
1844	MSTRG.2172	59.9146	-0.584541	0.277478	-2.10662	0.0351502	0.305965
1845	MSTRG.6018	292.589	0.278654	0.132301	2.10621	0.0351861	0.306001
1846	MSTRG.10866	92.1076	-0.490319	0.232878	-2.10548	0.0352496	0.30627
1847	MSTRG.2280	1154.01	0.349488	0.165995	2.10541	0.0352552	0.30627
1848	MSTRG.206	992.159	-0.207558	0.0986047	-2.10495	0.0352954	0.306453
1849	MSTRG.3932	610.675	-0.274522	0.130443	-2.10453	0.0353323	0.306608
1850	MSTRG.16142	1644.72	0.225748	0.107292	2.10404	0.0353746	0.306644
1851	MSTRG.16990	2782.16	-0.236088	0.112196	-2.10424	0.0353574	0.306644
1852	MSTRG.21623	1157.04	-0.213419	0.101454	-2.1036	0.0354131	0.306812
1853	MSTRG.22332	691.006	-0.227114	0.108074	-2.10146	0.0356009	0.308106
1854	MSTRG.8286	1240.73	0.201472	0.0958717	2.10147	0.0355997	0.308106
1855	MSTRG.18199	278.273	-0.296555	0.141148	-2.10103	0.0356386	0.308267
1856	MSTRG.3085	179.842	-0.464879	0.221394	-2.09978	0.0357481	0.308964
1857	MSTRG.5050	115.81	0.474967	0.22621	2.09967	0.0357577	0.308964
1858	MSTRG.23274	22.9507	0.945814	0.450598	2.09902	0.035815	0.309292
1859	MSTRG.19456	662.44	-0.43476	0.207222	-2.09803	0.0359023	0.309879
1860	MSTRG.3391	390.981	-0.406138	0.193633	-2.09746	0.0359529	0.309881
1861	MSTRG.8787	10851	-0.203239	0.0968924	-2.09758	0.0359424	0.309881
1862	MSTRG.9202	892.376	-0.222357	0.106017	-2.09737	0.0359604	0.309881
1863	MSTRG.14218	126.37	-0.403844	0.192681	-2.09593	0.0360887	0.31066
1864	MSTRG.20931	1077.86	0.203795	0.0972342	2.09592	0.0360895	0.31066
1865	MSTRG.8667	161.978	0.370385	0.1768	2.09493	0.0361769	0.311246
1866	MSTRG.14527	25.6749	0.885954	0.423212	2.09341	0.0363129	0.312081
1867	MSTRG.8630	333.482	-0.460652	0.220048	-2.09341	0.0363123	0.312081
1868	MSTRG.17277	444.81	-0.245929	0.117491	-2.09317	0.0363339	0.312094
1869	MSTRG.7681	861.426	0.212162	0.101431	2.0917	0.0364657	0.313059
1870	MSTRG.3537	100.528	-0.456388	0.218268	-2.09096	0.0365318	0.313459
1871	MSTRG.14062	114.803	0.46953	0.224678	2.08979	0.0366365	0.31419
1872	MSTRG.12645	636.783	0.222232	0.106426	2.08813	0.0367863	0.315305
1873	MSTRG.7223	46.6341	-0.674438	0.323028	-2.08786	0.0368103	0.315328
1874	MSTRG.9781	60.7116	-0.566042	0.271137	-2.08766	0.0368283	0.315328
1875	MSTRG.17396	65.8238	-0.552512	0.264726	-2.08711	0.0368786	0.315423
1876	MSTRG.18262	802.661	-0.270168	0.129442	-2.08718	0.0368719	0.315423
1877	MSTRG.22906	439.478	0.248391	0.119048	2.08647	0.0369359	0.315577
1878	MSTRG.5356	130.566	-0.426443	0.204384	-2.08648	0.0369352	0.315577
1879	MSTRG.11776	160.447	0.39762	0.190665	2.08543	0.0370301	0.316213
1880	MSTRG.14683	185.443	-0.33609	0.161224	-2.08462	0.037104	0.316676
1881	MSTRG.7751	224.829	-0.349166	0.16754	-2.08407	0.0371538	0.316932
1882	MSTRG.7284	182.498	-0.401154	0.192513	-2.08378	0.0371801	0.316988
1883	MSTRG.11500	436.487	-0.244367	0.117345	-2.08247	0.0372995	0.317837
1884	MSTRG.17805	83.2667	0.499416	0.239849	2.08221	0.0373234	0.317873
1885	MSTRG.10551	82.0138	-0.484946	0.232946	-2.08179	0.0373616	0.317906
1886	MSTRG.21959	163.741	-0.364658	0.17517	-2.08173	0.0373669	0.317906
1887	MSTRG.12531	339.211	0.294067	0.141307	2.08105	0.0374294	0.31793
1888	MSTRG.14335	99.3122	-0.57606	0.276821	-2.08098	0.0374355	0.31793
1889	MSTRG.16189	861.84	-0.193895	0.0931656	-2.08119	0.0374164	0.31793
1890	MSTRG.3463	130.195	-0.391512	0.188151	-2.08084	0.037449	0.31793
1891	MSTRG.20848	87.9233	-0.558476	0.26848	-2.08014	0.0375124	0.3183
1892	MSTRG.17903	362.57	0.25395	0.122115	2.07961	0.0375615	0.318549
1893	MSTRG.19994	1176.09	0.207621	0.0998542	2.07924	0.037595	0.318664
1894	MSTRG.3236	1841.14	0.192795	0.092745	2.07877	0.0376386	0.318866
1895	MSTRG.16917	564.597	0.245165	0.117951	2.07854	0.0376599	0.318878
1896	MSTRG.21348	141.469	-0.408227	0.196462	-2.07789	0.0377193	0.319212
1897	MSTRG.11124	299.37	-0.37866	0.182319	-2.07691	0.0378098	0.319559
1898	MSTRG.16888	938.111	0.268019	0.129046	2.07692	0.0378085	0.319559
1899	SMESG000034473.1	23.0093	0.912254	0.43926	2.0768	0.03782	0.319559
1900	MSTRG.12457	1595.72	-0.179224	0.0863106	-2.0765	0.037848	0.319627
1901	MSTRG.4871	2874.6	0.20399	0.0982612	2.076	0.0378943	0.31985
1902	MSTRG.15688	2212.61	0.285251	0.137482	2.07482	0.0380035	0.320317
1903	MSTRG.16974	305.01	-0.303651	0.14635	-2.07483	0.0380024	0.320317
1904	MSTRG.2512	93.1911	-0.57011	0.274804	-2.0746	0.0380232	0.320317
1905	MSTRG.8557	90.0693	-0.540825	0.260697	-2.07454	0.0380294	0.320317
1906	MSTRG.20042	259.968	0.327448	0.157871	2.07415	0.0380652	0.32045
1907	MSTRG.4488	542.973	0.258398	0.124646	2.07305	0.0381672	0.321141
1908	MSTRG.19437	7461.74	-0.193301	0.0932648	-2.07261	0.0382087	0.321322
1909	MSTRG.14393	2382.97	-0.188324	0.0908794	-2.07224	0.0382428	0.32144
1910	MSTRG.20442	521.672	0.262065	0.126523	2.07129	0.0383317	0.32185
1911	MSTRG.20984	192.954	-0.33813	0.163239	-2.07139	0.0383227	0.32185
1912	MSTRG.5073	796.865	0.240502	0.116141	2.07078	0.038379	0.322078
1913	MSTRG.6857	187.707	-0.32723	0.158106	-2.06968	0.038482	0.322774
1914	MSTRG.13096	726.266	-0.225051	0.108777	-2.06892	0.038554	0.323041
1915	MSTRG.6997	105.112	-0.477537	0.230808	-2.06897	0.0385486	0.323041
1916	MSTRG.250	329.588	-0.360693	0.174692	-2.06474	0.0389479	0.326171
1917	MSTRG.1843	27.7584	0.823847	0.399117	2.06417	0.0390014	0.326448
1918	MSTRG.4362	4938.74	-0.300584	0.145635	-2.06396	0.0390219	0.32645
1919	MSTRG.13809	22.6729	-0.927724	0.449722	-2.06288	0.0391238	0.32647
1920	MSTRG.15212	491.331	-0.257557	0.124823	-2.06337	0.0390773	0.32647
1921	MSTRG.22993	718.94	-0.232728	0.112808	-2.06305	0.0391082	0.32647
1922	MSTRG.2396	144.377	0.411303	0.199353	2.06319	0.0390942	0.32647
1923	MSTRG.4568	50.8646	-0.642969	0.311688	-2.06286	0.039126	0.32647
1924	MSTRG.945	1212.99	-0.271758	0.131879	-2.06066	0.0393356	0.328048
1925	MSTRG.19504	170.842	0.43766	0.212463	2.05993	0.0394053	0.32846
1926	MSTRG.11010	312.82	0.318172	0.154498	2.05939	0.0394569	0.328719
1927	MSTRG.4836	53.4503	-0.683277	0.331942	-2.05842	0.0395498	0.329322
1928	MSTRG.10332	343.022	-0.263782	0.128281	-2.05628	0.0397552	0.329835
1929	MSTRG.1109	169.696	0.350833	0.170592	2.05657	0.0397277	0.329835
1930	MSTRG.11326	1214.85	-0.202467	0.0984238	-2.05709	0.0396777	0.329835
1931	MSTRG.18768	233.518	-0.360123	0.175096	-2.05671	0.0397141	0.329835
1932	MSTRG.20453	60.6186	0.620318	0.301523	2.05728	0.0396592	0.329835
1933	MSTRG.21755	355.7	-0.286511	0.139327	-2.05639	0.0397449	0.329835
1934	MSTRG.2658	155.242	0.430322	0.20925	2.0565	0.0397345	0.329835
1935	MSTRG.19903	75.1594	0.506486	0.246367	2.05582	0.0398001	0.330036
1936	MSTRG.11203	91.1957	0.476153	0.231712	2.05494	0.039885	0.330258
1937	MSTRG.11554	272.107	-0.328048	0.159638	-2.05495	0.0398843	0.330258
1938	MSTRG.12692	587.495	-0.323561	0.157458	-2.0549	0.0398885	0.330258
1939	MSTRG.1937	2346.12	0.160611	0.0781859	2.05422	0.0399546	0.330464
1940	MSTRG.4114	430.938	0.307087	0.149477	2.05441	0.039936	0.330464
1941	MSTRG.20059	1102.71	0.231553	0.112781	2.05312	0.0400606	0.331171
1942	MSTRG.1303	821.042	-0.247252	0.120476	-2.05229	0.0401413	0.331667
1943	MSTRG.4394	4511.82	0.33969	0.165545	2.05195	0.0401746	0.331771
1944	MSTRG.8730	126.519	0.483044	0.235453	2.05155	0.0402133	0.33192
1945	MSTRG.19586	45.8425	-0.65554	0.319831	-2.04964	0.0403993	0.333113
1946	MSTRG.4803	745.811	-0.297829	0.145307	-2.04965	0.0403986	0.333113
1947	MSTRG.4899	1022.83	-0.229001	0.111743	-2.04936	0.0404272	0.333172
1948	MSTRG.18658	1391.11	0.185129	0.0903732	2.04849	0.0405117	0.333697
1949	MSTRG.5147	832.213	0.217926	0.106397	2.04823	0.0405375	0.333738
1950	MSTRG.15653	775.676	-0.249922	0.122036	-2.04794	0.0405661	0.333803
1951	MSTRG.10380	3518.53	0.199612	0.0974942	2.04742	0.0406165	0.333833
1952	MSTRG.1277	594.233	0.270938	0.132341	2.04726	0.0406322	0.333833
1953	MSTRG.13139	257.327	-0.323551	0.158012	-2.04764	0.0405956	0.333833
1954	MSTRG.21280	240.924	-0.332452	0.16247	-2.04623	0.0407334	0.334493
1955	MSTRG.2033	93.912	0.573868	0.280498	2.04589	0.0407674	0.334601
1956	MSTRG.17818	590.617	-0.23603	0.115416	-2.04504	0.0408504	0.33494
1957	MSTRG.8182	212.782	-0.314818	0.15394	-2.04507	0.0408484	0.33494
1958	MSTRG.7729	359.317	-0.296259	0.144917	-2.04433	0.0409206	0.335344
1959	MSTRG.22675	1479.37	0.178883	0.0875159	2.044	0.0409534	0.335441
1960	MSTRG.8694	2478.6	0.229254	0.112203	2.04321	0.0410312	0.335908
1961	MSTRG.18629	10340.4	-0.155245	0.0760061	-2.04254	0.0410981	0.336284
1962	MSTRG.6800	326.167	-0.384647	0.18841	-2.04154	0.0411972	0.336923
1963	MSTRG.14532	1374.66	0.185192	0.0907221	2.04131	0.0412198	0.336936
1964	MSTRG.4425	252.959	-0.383961	0.188157	-2.04064	0.0412871	0.337315
1965	MSTRG.2616	849.251	-0.193051	0.0946799	-2.03899	0.0414514	0.338485
1966	MSTRG.10056	256.208	0.366697	0.179888	2.03848	0.0415024	0.338729
1967	MSTRG.13314	31.6724	0.749443	0.367768	2.03781	0.0415685	0.339096
1968	MSTRG.8383	993.804	-0.209273	0.102713	-2.03745	0.0416047	0.339219
1969	MSTRG.18830	40.7119	-0.670843	0.329384	-2.03666	0.0416839	0.339692
1970	MSTRG.14861	66.7498	-0.512198	0.251601	-2.03575	0.041775	0.339826
1971	MSTRG.20259	272.926	-0.321137	0.157753	-2.03569	0.0417813	0.339826
1972	MSTRG.7369	745.243	-0.291924	0.143405	-2.03566	0.041785	0.339826
1973	MSTRG.7819	24.9096	1.02597	0.503983	2.03573	0.0417775	0.339826
1974	MSTRG.14458	1453.25	0.179098	0.0880951	2.03301	0.0420513	0.341645
1975	MSTRG.8830	1319.48	-0.186749	0.0918488	-2.03322	0.0420304	0.341645
1976	MSTRG.20275	185.879	-0.347909	0.171249	-2.0316	0.042194	0.342531
1977	MSTRG.2085	2535.68	0.176689	0.086974	2.03151	0.042203	0.342531
1978	MSTRG.17635	165.87	-0.359505	0.177069	-2.03031	0.0423252	0.342657
1979	MSTRG.20589	313.678	-0.320683	0.157937	-2.03046	0.0423103	0.342657
1980	MSTRG.23	161.65	0.401141	0.197526	2.03082	0.0422729	0.342657
1981	MSTRG.866	21546.3	-0.155772	0.0767152	-2.03052	0.0423034	0.342657
1982	MSTRG.9104	48.5709	-0.687597	0.338648	-2.03042	0.0423139	0.342657
1983	MSTRG.15994	96.6671	-0.446452	0.22002	-2.02915	0.0424434	0.343268
1984	MSTRG.16158	1036.12	-0.186715	0.0920109	-2.02927	0.0424312	0.343268
1985	MSTRG.9723	62.9631	0.692321	0.341382	2.028	0.0425608	0.344043
1986	MSTRG.5814	402.508	-0.279236	0.137761	-2.02696	0.0426666	0.344726
1987	MSTRG.19591	4164.1	0.160011	0.0789628	2.02641	0.0427231	0.345008
1988	MSTRG.20575	1134.76	0.200872	0.0991706	2.02552	0.0428142	0.345397
1989	MSTRG.6955	976.371	0.196545	0.0970316	2.02558	0.042808	0.345397
1990	MSTRG.15662	386.956	-0.280978	0.138743	-2.02518	0.0428492	0.345505
1991	MSTRG.2374	1059.85	0.332051	0.164041	2.02419	0.0429507	0.34615
1992	MSTRG.12118	648.349	0.208987	0.103299	2.02313	0.0430594	0.346851
1993	MSTRG.12217	1652.64	0.181345	0.089684	2.02205	0.0431716	0.347581
1994	MSTRG.5256	508.692	0.237648	0.117573	2.02127	0.0432515	0.347875
1995	MSTRG.9556	59.1552	-0.71207	0.352284	-2.0213	0.0432489	0.347875
1996	MSTRG.3642	47.5977	-0.724547	0.358528	-2.02089	0.043291	0.348019
1997	SMESG000018553.1	28.2733	0.778581	0.385398	2.0202	0.0433626	0.34842
1998	MSTRG.16279	51.8088	-0.769228	0.380917	-2.01941	0.0434443	0.348902
[truncated: 26,004 more rows]

## Sheet: foxD1(RNAi)
	Unnamed: 0	baseMean	log2FoldChange	lfcSE	stat	pvalue	padj
0	MSTRG.2689	434.778	-1.63985	0.157285	-10.426	1.88744e-25	3.88436e-21
1	MSTRG.21299	2400.11	0.841117	0.0987639	8.51644	1.64538e-17	1.69309e-13
2	MSTRG.19528	3993.01	-0.858396	0.102987	-8.33497	7.75164e-17	5.31762e-13
3	MSTRG.9872	229.121	-1.79324	0.223203	-8.03414	9.42357e-16	4.84843e-12
4	MSTRG.13933	1537.48	-0.822249	0.111222	-7.39288	1.4368e-13	5.91387e-10
5	MSTRG.5694	8322.08	-0.615447	0.0859405	-7.16132	7.99057e-13	2.74077e-09
6	MSTRG.16036	441.079	-1.12294	0.160023	-7.01736	2.261e-12	6.64734e-09
7	MSTRG.22528	72.8186	-2.55475	0.391657	-6.52294	6.89435e-11	1.77357e-07
8	MSTRG.2346	101.858	2.50847	0.38596	6.4993	8.06939e-11	1.8452e-07
9	MSTRG.9685	3247.6	0.867725	0.134107	6.47039	9.77481e-11	2.01166e-07
10	MSTRG.18434	1196.62	-0.744949	0.117442	-6.3431	2.25186e-10	4.21303e-07
11	MSTRG.2939	395.044	-1.00767	0.162974	-6.18299	6.28993e-10	1.07872e-06
12	MSTRG.19758	270.771	1.4838	0.241677	6.13962	8.27166e-10	1.30947e-06
13	MSTRG.9969	13256	0.664036	0.109547	6.06166	1.34721e-09	1.9804e-06
14	MSTRG.12799	7618.07	0.463045	0.0773654	5.98516	2.16175e-09	2.88148e-06
15	MSTRG.7958	66.8671	4.56428	0.76334	5.97936	2.24022e-09	2.88148e-06
16	MSTRG.20887	2725.12	-0.491634	0.0858019	-5.72987	1.0051e-08	1.21676e-05
17	MSTRG.13844	224.479	1.44882	0.25672	5.64359	1.66543e-08	1.90415e-05
18	MSTRG.521	2001.22	0.564933	0.104586	5.4016	6.60496e-08	7.15421e-05
19	MSTRG.2344	1146.9	-0.56172	0.107205	-5.2397	1.60841e-07	0.000165506
20	MSTRG.18190	317.224	-0.943325	0.182711	-5.16294	2.43105e-07	0.000238243
21	MSTRG.22178	115.211	-1.60894	0.313637	-5.12993	2.89851e-07	0.000271142
22	MSTRG.6326	484.694	-2.61777	0.512098	-5.11185	3.19015e-07	0.000285449
23	MSTRG.6332	769.46	-0.712801	0.144547	-4.93127	8.16982e-07	0.000700562
24	MSTRG.13843	80.5643	1.7742	0.367243	4.83113	1.35759e-06	0.00111757
25	MSTRG.14369	1403.6	0.634937	0.131882	4.81443	1.4762e-06	0.0011432
26	SMESG000043019.1	25.2673	-7.64235	1.58843	-4.81126	1.49983e-06	0.0011432
27	MSTRG.8433	179.066	1.5439	0.32296	4.78046	1.74893e-06	0.00128546
28	MSTRG.3003	131.082	1.94637	0.410424	4.74234	2.11262e-06	0.00144926
29	MSTRG.3091	424.894	0.819943	0.172682	4.74827	2.05161e-06	0.00144926
30	MSTRG.16117	34.5104	7.43554	1.58519	4.69062	2.7238e-06	0.00180825
31	MSTRG.2361	10440.8	-0.56771	0.121376	-4.67727	2.90724e-06	0.00186972
32	MSTRG.3395	159.765	-1.77262	0.381671	-4.64438	3.41103e-06	0.00212724
33	MSTRG.11554	334.533	-0.848204	0.189396	-4.47847	7.51801e-06	0.00452312
34	MSTRG.7606	296.297	1.00056	0.223659	4.47357	7.69239e-06	0.00452312
35	MSTRG.4755	1712.65	-0.426922	0.0956834	-4.46182	8.12658e-06	0.0046457
36	MSTRG.17895	5405.94	-0.459443	0.103228	-4.45076	8.55678e-06	0.00475942
37	MSTRG.10047	518.749	0.733343	0.166318	4.40927	1.03719e-05	0.00547315
38	MSTRG.19759	269.398	1.1329	0.256867	4.41045	1.03156e-05	0.00547315
39	MSTRG.10078	41.6889	2.55145	0.581578	4.38711	1.14865e-05	0.00576567
40	MSTRG.2285	1012.18	0.563278	0.128382	4.3875	1.14663e-05	0.00576567
41	MSTRG.19653	15.3668	7.28186	1.67653	4.34341	1.40287e-05	0.00676202
42	MSTRG.21303	33.0206	2.86037	0.658789	4.34185	1.41286e-05	0.00676202
43	MSTRG.2676	842.055	0.593721	0.136975	4.33452	1.4608e-05	0.00683256
44	MSTRG.6839	17.7946	7.26819	1.68186	4.32151	1.54963e-05	0.00708696
45	MSTRG.22669	1587.76	-0.406817	0.0956221	-4.25443	2.09581e-05	0.00937649
46	MSTRG.9449	97.2716	1.67616	0.396975	4.22234	2.41774e-05	0.0105866
47	MSTRG.7980	1746.65	-0.399253	0.0950008	-4.20263	2.63829e-05	0.0113117
48	MSTRG.14970	464.606	-1.11033	0.267411	-4.15214	3.29384e-05	0.0138341
49	MSTRG.14883	2064.73	-0.398108	0.0971109	-4.09952	4.14007e-05	0.016521
50	MSTRG.19902	1938.64	-0.389424	0.095037	-4.09761	4.1744e-05	0.016521
51	MSTRG.7999	44.1214	2.34137	0.570804	4.10188	4.09799e-05	0.016521
52	MSTRG.14341	738.558	0.536929	0.132937	4.03896	5.36876e-05	0.020847
53	MSTRG.11417	1056.94	0.647333	0.160845	4.02458	5.70765e-05	0.0217525
54	MSTRG.8241	948.365	0.51907	0.129656	4.00344	6.24284e-05	0.0233596
55	MSTRG.17736	11225.6	-0.428545	0.10885	-3.93701	8.25033e-05	0.03032
56	MSTRG.1183	20.402	4.88651	1.24775	3.91625	8.99388e-05	0.0324726
57	MSTRG.21864	52.5459	-1.62607	0.416075	-3.90812	9.30168e-05	0.0330049
58	MSTRG.18725	239.071	-0.813148	0.21214	-3.83308	0.00012655	0.0441424
59	MSTRG.13096	1264.42	0.398041	0.105962	3.75645	0.000172342	0.0591132
60	MSTRG.2103	1034.81	-0.423857	0.113031	-3.74991	0.000176897	0.0596809
61	MSTRG.12941	346.214	0.825471	0.221726	3.72293	0.000196926	0.0653668
62	MSTRG.13520	1121.14	-0.414624	0.112689	-3.67937	0.000233814	0.0751859
63	MSTRG.15203	174.854	1.11475	0.302942	3.67975	0.000233458	0.0751859
64	MSTRG.20670	3927.7	0.301554	0.0822585	3.66593	0.000246442	0.0767425
65	MSTRG.6904	72.2263	1.35164	0.369057	3.66242	0.000249842	0.0767425
66	MSTRG.9778	147.602	1.04523	0.284933	3.66835	0.000244124	0.0767425
67	MSTRG.19976	8.30638	6.56802	1.79778	3.65341	0.000258785	0.0783205
68	MSTRG.6244	85.1335	1.41851	0.388836	3.64809	0.000264192	0.0787982
69	MSTRG.4854	1855.11	0.520525	0.143321	3.63189	0.000281353	0.0827178
70	MSTRG.16726	6565.17	0.379893	0.105565	3.59866	0.000319867	0.0927164
71	MSTRG.17851	315.198	0.807434	0.225351	3.58301	0.000339658	0.0970855
72	MSTRG.6586	930.317	0.444046	0.124149	3.57673	0.000347917	0.0980839
73	MSTRG.7487	119.387	-1.02497	0.288395	-3.55406	0.000379333	0.105495
74	MSTRG.21341	417.364	-0.556467	0.157193	-3.54003	0.000400086	0.106932
75	MSTRG.5965	247.188	-0.72965	0.205894	-3.54381	0.000394391	0.106932
76	MSTRG.9682	8327.41	0.292645	0.0826455	3.54097	0.000398664	0.106932
77	MSTRG.9801	140.874	-1.14871	0.326848	-3.51452	0.000440548	0.116237
78	MSTRG.2236	224.547	0.869918	0.247828	3.51016	0.000447829	0.116662
79	MSTRG.10022	836.628	-0.489402	0.1401	-3.49323	0.000477217	0.122764
80	MSTRG.20227	10.7338	5.9591	1.71506	3.47457	0.000511676	0.130004
81	MSTRG.17728	2123.25	-0.370214	0.10675	-3.46805	0.000524255	0.131575
82	MSTRG.5493	260.14	-0.855601	0.246989	-3.46413	0.000531955	0.131899
83	MSTRG.11811	1303.93	-0.34678	0.100847	-3.43868	0.000584568	0.141045
84	MSTRG.20178	1500.25	-0.374363	0.108934	-3.43661	0.00058905	0.141045
85	MSTRG.7413	125.274	1.19929	0.348991	3.43645	0.000589401	0.141045
86	MSTRG.6711	130.855	1.17475	0.343206	3.42288	0.000619623	0.146573
87	MSTRG.4757	956.029	-0.415381	0.122104	-3.40187	0.000669275	0.156519
88	MSTRG.15007	14.8606	4.55412	1.34212	3.39323	0.000690731	0.157947
89	MSTRG.18398	42.9405	1.78513	0.525704	3.3957	0.000684536	0.157947
90	MSTRG.13093	582.775	0.53251	0.157386	3.38348	0.000715744	0.160762
91	MSTRG.18538	273.951	0.942005	0.278505	3.38236	0.000718662	0.160762
92	MSTRG.11708	569.689	0.49261	0.145808	3.37848	0.000728886	0.161295
93	MSTRG.17820	351.175	0.632755	0.187892	3.36765	0.000758106	0.165977
94	MSTRG.17213	6207.05	-0.299499	0.0895461	-3.34464	0.000823891	0.176444
95	MSTRG.4063	18.4016	2.8851	0.862417	3.34537	0.00082173	0.176444
96	MSTRG.9921	800.115	-0.423368	0.126679	-3.34205	0.000831635	0.176444
97	MSTRG.21382	28.2228	-2.70012	0.809802	-3.3343	0.000855132	0.177355
98	MSTRG.3727	5190.74	-0.266605	0.0800099	-3.33215	0.000861784	0.177355
99	MSTRG.9407	8272.51	-0.275321	0.082621	-3.33234	0.000861193	0.177355
100	MSTRG.20253	376.484	0.56633	0.171256	3.30691	0.000943315	0.192212
101	MSTRG.2920	1101.76	0.405037	0.123635	3.27608	0.00105261	0.211842
102	MSTRG.2961	9747.65	-0.236488	0.0722313	-3.27403	0.00106024	0.211842
103	MSTRG.11273	261.741	0.763901	0.234121	3.26285	0.00110298	0.216184
104	MSTRG.9376	24.4249	-3.57015	1.09387	-3.26377	0.00109942	0.216184
105	MSTRG.10145	255.764	-0.654399	0.200934	-3.25679	0.00112679	0.216723
106	MSTRG.16848	9.04368	5.937	1.82222	3.25812	0.00112152	0.216723
107	MSTRG.13543	3059.08	-0.268433	0.0827431	-3.24418	0.0011779	0.224456
108	MSTRG.5267	824.956	0.612078	0.189969	3.22199	0.00127304	0.240359
109	MSTRG.11179	654.244	0.685481	0.213527	3.21028	0.00132604	0.245855
110	MSTRG.14804	619.066	1.51938	0.47322	3.21074	0.00132396	0.245855
111	MSTRG.16349	511.335	-0.6266	0.19572	-3.20152	0.00136705	0.251195
112	MSTRG.7773	47.6904	1.80319	0.566419	3.18349	0.0014551	0.265009
113	MSTRG.21807	4108.77	-0.310811	0.0980082	-3.17127	0.00151772	0.273989
114	MSTRG.9001	114.5	1.11216	0.354382	3.13832	0.00169921	0.304086
115	MSTRG.17358	1068.91	-0.463307	0.147845	-3.13374	0.00172596	0.306125
116	MSTRG.18637	827.745	0.468753	0.149726	3.13074	0.00174368	0.306125
117	MSTRG.19863	181.636	-1.11894	0.357626	-3.1288	0.00175524	0.306125
118	MSTRG.10990	1674.71	0.372023	0.119288	3.1187	0.00181653	0.314153
119	MSTRG.18357	512.537	-0.461828	0.148207	-3.11609	0.00183264	0.314299
120	MSTRG.14453	16.474	2.66891	0.857457	3.11259	0.00185456	0.315428
121	MSTRG.10575	11.0091	3.7726	1.21548	3.1038	0.00191051	0.32228
122	MSTRG.11662	701.227	-0.40749	0.131963	-3.08791	0.00201568	0.33615
123	MSTRG.710	1079.83	0.565982	0.183374	3.08648	0.00202539	0.33615
124	MSTRG.17769	80.4556	1.44973	0.470272	3.08275	0.00205099	0.337675
125	MSTRG.15676	2713.97	-0.285081	0.0926179	-3.07803	0.00208372	0.337832
126	MSTRG.17757	944.612	-0.361099	0.117321	-3.07788	0.00208477	0.337832
127	MSTRG.8102	1250.73	-0.437714	0.142505	-3.07157	0.00212935	0.342359
128	MSTRG.231	246.099	0.744186	0.242804	3.06496	0.00217699	0.347306
129	MSTRG.4918	493.452	0.561719	0.184301	3.04783	0.00230496	0.3642
130	MSTRG.9905	15.1996	-3.29144	1.08054	-3.0461	0.00231828	0.3642
131	MSTRG.4919	3558.68	0.263867	0.086906	3.03623	0.00239554	0.373486
132	MSTRG.19418	498.896	-0.565381	0.186411	-3.03298	0.00242155	0.374703
133	MSTRG.1073	292.506	-0.600925	0.199016	-3.01949	0.00253202	0.386953
134	MSTRG.19667	3050.85	-0.28639	0.0948708	-3.01874	0.00253832	0.386953
135	MSTRG.21112	36.9155	1.91852	0.638442	3.005	0.00265578	0.401882
136	MSTRG.22501	689.387	-0.434545	0.144951	-2.99786	0.00271879	0.408414
137	MSTRG.20213	6363.8	-0.226364	0.0757116	-2.98982	0.00279141	0.416285
138	MSTRG.15987	147.781	-0.811992	0.27181	-2.98735	0.00281406	0.416643
139	MSTRG.17364	46.4104	1.69374	0.567839	2.98279	0.00285638	0.419888
140	MSTRG.16201	5900.92	-0.263455	0.088531	-2.97586	0.00292173	0.426448
141	MSTRG.15442	1589.68	0.29281	0.0985546	2.97104	0.00296792	0.427131
142	MSTRG.8546	696.168	0.425832	0.14323	2.97307	0.00294837	0.427131
143	MSTRG.14759	8.21636	5.81452	1.95879	2.96842	0.00299331	0.427794
144	MSTRG.11097	26.7632	1.93305	0.654797	2.95214	0.0031558	0.447907
145	MSTRG.20176	576.506	-0.447104	0.15194	-2.94262	0.00325443	0.45562
146	MSTRG.20481	200.634	0.703732	0.239057	2.94378	0.0032423	0.45562
147	MSTRG.18554	585.904	0.594098	0.20357	2.9184	0.00351837	0.489244
148	MSTRG.11320	31.0319	2.05366	0.704809	2.91378	0.00357081	0.493203
149	MSTRG.17199	328.819	0.553499	0.191017	2.89764	0.00375982	0.515847
150	SMESG000044805.1	9.13049	5.10432	1.76584	2.89058	0.00384527	0.524077
151	MSTRG.13824	34.842	2.95151	1.02257	2.88637	0.0038971	0.524199
152	MSTRG.17064	50.3038	-1.23586	0.427923	-2.88804	0.0038765	0.524199
153	MSTRG.14071	2662.04	0.279613	0.0970725	2.88046	0.00397101	0.525757
154	MSTRG.16234	653.426	0.400441	0.138901	2.88293	0.00393999	0.525757
155	MSTRG.16847	7432.21	-0.228124	0.0792283	-2.87932	0.00398533	0.525757
156	MSTRG.5490	1707.29	0.334738	0.116689	2.86864	0.0041224	0.540376
157	MSTRG.20243	77.4023	1.21323	0.423974	2.86157	0.00421553	0.548366
158	MSTRG.22917	384.681	0.679407	0.237582	2.85967	0.00424084	0.548366
159	MSTRG.9684	14332.1	0.241996	0.0846736	2.85799	0.00426329	0.548366
160	MSTRG.10032	216.463	-0.631543	0.221239	-2.85457	0.0043095	0.549811
161	MSTRG.19535	267	0.771234	0.270858	2.84738	0.00440811	0.549811
162	MSTRG.19848	13.1524	3.23763	1.13664	2.84843	0.00439356	0.549811
163	MSTRG.21646	2599.22	0.35768	0.125505	2.84993	0.00437288	0.549811
164	MSTRG.4209	26.4893	2.08955	0.73293	2.85095	0.00435892	0.549811
165	MSTRG.20215	540.792	-1.08546	0.384305	-2.82448	0.0047357	0.587113
166	MSTRG.10053	573.722	0.432483	0.154693	2.79576	0.00517783	0.618614
167	MSTRG.11665	211.408	0.95578	0.340801	2.80451	0.00503932	0.618614
168	MSTRG.13153	424.166	-0.447525	0.160153	-2.79436	0.0052002	0.618614
169	MSTRG.14326	249.021	-0.681899	0.243694	-2.79818	0.0051392	0.618614
170	MSTRG.14786	823.815	-0.365224	0.130592	-2.79667	0.00516327	0.618614
171	MSTRG.20999	703.314	0.527499	0.188271	2.80181	0.00508172	0.618614
172	MSTRG.2377	1756.28	-0.352066	0.125763	-2.79945	0.00511898	0.618614
173	MSTRG.9903	8960.9	0.230987	0.0827419	2.79166	0.00524391	0.620228
174	MSTRG.6376	3013.34	-0.228909	0.0821245	-2.78734	0.0053142	0.62495
175	MSTRG.14148	21053.1	-0.244951	0.0880539	-2.78183	0.00540529	0.63205
176	MSTRG.14962	93.2084	1.17154	0.421861	2.77706	0.00548526	0.637778
177	MSTRG.20898	237.664	-0.560591	0.202208	-2.77234	0.00556544	0.640724
178	SMESG000007438.1	45.1442	1.28424	0.463306	2.77191	0.00557287	0.640724
179	MSTRG.12445	1824.66	0.265856	0.0960586	2.76764	0.00564635	0.645566
180	MSTRG.19304	286.398	0.817918	0.296372	2.75977	0.0057842	0.657673
181	MSTRG.11452	1411.75	-0.350493	0.127527	-2.74839	0.00598892	0.66901
182	MSTRG.12193	156.01	0.729135	0.265147	2.74993	0.00596088	0.66901
183	MSTRG.501	77.3714	1.10484	0.402197	2.74702	0.00601394	0.66901
184	MSTRG.6508	5338.83	0.210727	0.0766145	2.75049	0.00595063	0.66901
185	MSTRG.2392	73.0477	-3.52849	1.28739	-2.7408	0.00612904	0.678149
186	MSTRG.14261	73.3978	1.34716	0.492218	2.73691	0.00620199	0.682551
187	MSTRG.9919	24.9075	2.30335	0.844632	2.72704	0.00639048	0.699554
188	MSTRG.3026	139.473	0.88519	0.324822	2.72515	0.00642713	0.699844
189	MSTRG.896	424.285	0.585248	0.215018	2.72186	0.00649153	0.703136
190	MSTRG.17454	8.42013	4.66506	1.71649	2.71779	0.00657202	0.703473
191	MSTRG.4857	1332.98	-0.280909	0.103277	-2.71995	0.00652921	0.703473
192	MSTRG.9545	2761.07	-0.245087	0.0902208	-2.71652	0.00659719	0.703473
193	MSTRG.13954	11.5164	3.03635	1.12248	2.70503	0.00682991	0.706704
194	MSTRG.14336	237.865	0.558918	0.206324	2.70893	0.00675009	0.706704
195	MSTRG.20388	1059.99	0.391946	0.144831	2.70624	0.00680501	0.706704
196	MSTRG.23696	85.8682	1.04	0.384495	2.70485	0.00683354	0.706704
197	MSTRG.5648	2011.97	0.376306	0.139101	2.70527	0.00682493	0.706704
198	MSTRG.9898	684.763	-0.373901	0.13804	-2.70864	0.00675588	0.706704
199	MSTRG.11490	167.45	-0.675443	0.250448	-2.69693	0.00699812	0.720107
200	MSTRG.13545	128.556	0.820533	0.30472	2.69274	0.00708674	0.725597
201	MSTRG.3392	1989.06	0.24506	0.0911064	2.68982	0.00714907	0.726012
202	MSTRG.5586	137.271	0.923017	0.343225	2.68925	0.00716135	0.726012
203	MSTRG.14110	1281.73	-0.375825	0.140026	-2.68397	0.00727533	0.727994
204	MSTRG.20181	4385.63	-0.335083	0.124804	-2.68488	0.00725558	0.727994
205	MSTRG.20633	1522.97	0.402469	0.150073	2.68182	0.00732239	0.727994
206	MSTRG.5093	4603.62	-0.24583	0.0916406	-2.68255	0.00730639	0.727994
207	MSTRG.3278	194.159	0.718812	0.268196	2.68017	0.00735837	0.728054
208	MSTRG.20883	1059.68	-0.317845	0.119013	-2.67068	0.00756974	0.741835
209	MSTRG.21793	31.2207	1.65309	0.618843	2.67125	0.00755691	0.741835
210	MSTRG.16740	406.626	-0.560071	0.210086	-2.66591	0.00767797	0.748875
211	MSTRG.17587	550.528	-0.388923	0.145981	-2.66419	0.0077173	0.749161
212	MSTRG.1306	1414.67	0.284302	0.1071	2.65455	0.00794135	0.765792
213	MSTRG.19760	523.558	0.449113	0.169245	2.65363	0.00796304	0.765792
214	MSTRG.16335	182.344	-0.649172	0.245844	-2.64058	0.00827631	0.779823
215	MSTRG.1677	11.1911	-2.66508	1.00959	-2.63976	0.00829638	0.779823
216	MSTRG.18093	869.421	-0.31149	0.118003	-2.63968	0.00829841	0.779823
217	MSTRG.4073	2353.78	-0.271195	0.102569	-2.64403	0.00819254	0.779823
218	MSTRG.6318	576.748	-0.415029	0.157071	-2.64229	0.00823466	0.779823
219	MSTRG.17777	91.2141	2.38178	0.903608	2.63585	0.00839264	0.785093
220	MSTRG.5814	345.5	0.491615	0.187198	2.62618	0.00863493	0.804104
221	MSTRG.49	399.198	0.548089	0.208932	2.62329	0.00870839	0.807291
222	MSTRG.6472	1157	-0.343369	0.131051	-2.62011	0.00879007	0.811209
223	MSTRG.13414	52.2018	-1.12765	0.431381	-2.61405	0.00894748	0.817725
224	MSTRG.22157	86.0976	-0.89284	0.341537	-2.61418	0.0089442	0.817725
225	MSTRG.4042	261.22	0.6811	0.260676	2.61282	0.00897988	0.817725
226	MSTRG.9839	1159.02	-0.337573	0.12956	-2.60553	0.00917322	0.831651
227	MSTRG.10772	3999.17	0.271213	0.104723	2.58982	0.0096026	0.859593
228	MSTRG.17907	881.75	-0.502746	0.193996	-2.59153	0.00955508	0.859593
229	MSTRG.4815	232.69	-0.569627	0.219961	-2.58967	0.00960673	0.859593
230	MSTRG.13966	416.758	0.587686	0.227494	2.58331	0.00978584	0.868072
231	MSTRG.8173	846.763	-0.336561	0.130276	-2.58344	0.00978199	0.868072
232	MSTRG.23463	1480.39	-0.261283	0.101226	-2.58119	0.00984592	0.868537
233	MSTRG.4458	515.571	0.479206	0.185727	2.58016	0.00987549	0.868537
234	MSTRG.20875	1220.77	-0.270983	0.1053	-2.57344	0.0100694	0.881824
235	MSTRG.13095	22.739	2.03024	0.79219	2.56281	0.0103828	0.884443
236	MSTRG.14971	429.049	1.85206	0.725669	2.55221	0.0107043	0.884443
237	MSTRG.18009	1038.33	-0.295302	0.11554	-2.55584	0.0105932	0.884443
238	MSTRG.19011	1436.01	-0.291618	0.114191	-2.55378	0.0106561	0.884443
239	MSTRG.19290	968.38	0.337034	0.131686	2.55937	0.0104861	0.884443
240	MSTRG.1996	3766.09	-0.228945	0.0894165	-2.56043	0.0104543	0.884443
241	MSTRG.20381	2941.47	-0.256972	0.100413	-2.55915	0.0104929	0.884443
242	MSTRG.20399	1261.53	0.377444	0.147342	2.56168	0.0104166	0.884443
243	MSTRG.21880	146.6	0.732694	0.287021	2.55275	0.0106876	0.884443
244	MSTRG.22667	21278.3	-0.169775	0.0661963	-2.56472	0.0103259	0.884443
245	MSTRG.22854	2466.68	-0.236872	0.0926104	-2.55773	0.0105359	0.884443
246	MSTRG.6167	8.14079	-4.2505	1.66659	-2.55042	0.0107593	0.884443
247	MSTRG.6619	952.621	0.334602	0.130411	2.56575	0.0102953	0.884443
248	MSTRG.984	4238.79	-0.216591	0.0848493	-2.55266	0.0106904	0.884443
249	MSTRG.995	1152.45	-0.37502	0.146786	-2.55487	0.0106229	0.884443
250	SMESG000034087.1	47.2108	1.17569	0.46114	2.54953	0.0107869	0.884443
251	MSTRG.15617	418.378	-0.42992	0.168882	-2.54568	0.0109064	0.89069
252	MSTRG.14184	12.6283	2.79429	1.10084	2.53832	0.0111388	0.899738
253	MSTRG.19686	1141.27	-0.286404	0.112907	-2.53664	0.0111921	0.899738
254	MSTRG.20206	216.9	0.660631	0.260039	2.54051	0.011069	0.899738
255	MSTRG.8331	528.174	-0.406448	0.160158	-2.53779	0.0111554	0.899738
256	MSTRG.7671	3351.05	-0.228181	0.0900521	-2.53388	0.0112807	0.903335
257	MSTRG.11002	325.615	-0.48879	0.193168	-2.53039	0.0113936	0.908835
258	MSTRG.347	28.5202	-1.62714	0.645124	-2.52221	0.0116622	0.926005
259	MSTRG.7269	278.021	0.518554	0.205686	2.5211	0.0116988	0.926005
260	MSTRG.18323	141.787	-0.666658	0.264723	-2.51833	0.0117913	0.929752
261	MSTRG.8775	9.39392	-2.79104	1.10921	-2.51624	0.0118615	0.931716
262	MSTRG.12243	613.667	-0.351578	0.140044	-2.51049	0.0120564	0.939286
263	MSTRG.23509	1194.88	-0.29977	0.119523	-2.50806	0.0121396	0.939286
264	MSTRG.5033	847.335	0.312249	0.124456	2.50891	0.0121105	0.939286
265	SMESG000005117.1	137.951	0.794147	0.316808	2.50671	0.0121861	0.939286
266	SMESG000072944.1	15.6702	2.3549	0.938974	2.50795	0.0121433	0.939286
267	MSTRG.16116	47.8161	1.75883	0.702945	2.50209	0.0123461	0.94807
268	MSTRG.10219	132.074	0.697955	0.279118	2.50057	0.0123994	0.94862
269	MSTRG.2167	74.1705	-1.11707	0.447054	-2.49875	0.0124634	0.949987
270	MSTRG.12852	4993.79	-0.202008	0.0811771	-2.48849	0.0128287	0.960055
271	MSTRG.16264	5247.85	-0.21249	0.0853343	-2.49009	0.0127711	0.960055
272	MSTRG.18777	1018.12	-0.298431	0.119922	-2.48855	0.0128267	0.960055
273	MSTRG.19340	49.178	1.17472	0.47132	2.49241	0.0126879	0.960055
274	MSTRG.9528	416.113	0.463594	0.186243	2.48919	0.0128034	0.960055
275	MSTRG.22827	1122.04	0.282971	0.113959	2.4831	0.0130246	0.968263
276	MSTRG.5238	485.678	-0.387277	0.155979	-2.48288	0.0130325	0.968263
277	MSTRG.16244	4762.96	-0.196653	0.0794084	-2.47647	0.0132687	0.968336
278	MSTRG.17620	326.444	0.496103	0.200241	2.47752	0.0132298	0.968336
279	MSTRG.18552	1815.11	0.329231	0.132881	2.47764	0.0132255	0.968336
280	MSTRG.20223	5683.45	-0.194569	0.0785573	-2.47678	0.0132575	0.968336
281	MSTRG.20921	57.4901	1.13708	0.458661	2.47912	0.0131708	0.968336
282	MSTRG.2117	197.613	0.628178	0.254524	2.46805	0.0135852	0.987925
283	MSTRG.4581	605.125	0.399639	0.162137	2.46483	0.013708	0.993346
284	MSTRG.12355	4879.7	-0.272897	0.110832	-2.46226	0.0138066	0.993499
285	MSTRG.17453	4122.34	-0.2243	0.0910714	-2.4629	0.0137817	0.993499
286	MSTRG.18709	3282.08	-0.237926	0.0966899	-2.46072	0.0138659	0.994289
287	MSTRG.1	218.219	0.138113	0.237627	0.581216	0.561095	1
288	MSTRG.100	1200.11	0.0354243	0.117353	0.301861	0.762758	1
289	MSTRG.1000	107.912	0.301039	0.322649	0.933022	0.350808	1
290	MSTRG.10000	5198.58	0.0376215	0.0800129	0.470193	0.638217	1
291	MSTRG.10002	1614.69	0.0797881	0.11373	0.701557	0.482955	1
292	MSTRG.10003	137.214	0.0856554	0.29072	0.294632	0.768275	1
293	MSTRG.10005	207.699	-0.341038	0.278221	-1.22578	0.220281	1
294	MSTRG.10006	58.9085	0.351807	0.410586	0.856843	0.391532	1
295	MSTRG.10007	45.3912	0.102622	0.440831	0.232791	0.815923	1
296	MSTRG.10008	409.687	0.141147	0.171631	0.822389	0.410856	1
297	MSTRG.10009	18.9063	0.267456	0.714766	0.374186	0.708266	1
298	MSTRG.1001	102.039	-0.121049	0.310465	-0.389896	0.696613	1
299	MSTRG.10010	447.003	-0.0828176	0.160005	-0.517594	0.604742	1
300	MSTRG.10012	121.048	-0.391162	0.304805	-1.28332	0.19938	1
301	MSTRG.10013	281.537	-0.140224	0.188736	-0.742963	0.457504	1
302	MSTRG.10016	23.5659	-0.106376	0.610823	-0.174152	0.861746	1
303	MSTRG.10017	38.5391	0.191743	0.553509	0.346413	0.729032	1
304	MSTRG.10018	2303.17	-0.0326944	0.12902	-0.253405	0.799955	1
305	MSTRG.10019	3523.41	-0.2279	0.233417	-0.976365	0.328883	1
306	MSTRG.10020	300.632	-0.240963	0.27958	-0.861877	0.388755	1
307	MSTRG.10021	3301.14	-0.0886915	0.136138	-0.651483	0.514735	1
308	MSTRG.10023	910.126	-0.0969362	0.127356	-0.761141	0.446573	1
309	MSTRG.10024	9.65247	-0.371042	1.01362	-0.366057	0.714323	1
310	MSTRG.10025	4803.26	-0.00985103	0.115985	-0.0849336	0.932314	1
311	MSTRG.10026	147.652	-0.00348794	0.261065	-0.0133604	0.98934	1
312	MSTRG.10027	254.757	0.230651	0.196972	1.17099	0.241605	1
313	MSTRG.10029	907.853	0.083752	0.117106	0.715178	0.474499	1
314	MSTRG.1003	9.7995	0.771471	1.03888	0.742597	0.457726	1
315	MSTRG.10030	50.6517	0.102853	0.46914	0.219236	0.826466	1
316	MSTRG.10031	16.978	-0.0644331	0.722448	-0.0891872	0.928933	1
317	MSTRG.10033	464.716	0.205487	0.15166	1.35492	0.175444	1
318	MSTRG.10034	458.578	0.0992305	0.199514	0.497361	0.618934	1
319	MSTRG.10035	915.383	-0.0865271	0.118748	-0.728663	0.466208	1
320	MSTRG.10036	185.222	0.100505	0.237229	0.423662	0.671812	1
321	MSTRG.10037	12.3912	-0.336201	0.863188	-0.389488	0.696915	1
322	MSTRG.10038	2300.25	-0.11053	0.0943582	-1.17139	0.241444	1
323	MSTRG.10039	176.896	-0.0859465	0.240198	-0.357815	0.720481	1
324	MSTRG.1004	38.4276	-0.247534	0.526289	-0.470338	0.638114	1
325	MSTRG.10040	764.234	-0.304714	0.153593	-1.9839	0.0472671	1
326	MSTRG.10041	27.3487	0.0518479	0.575658	0.0900672	0.928234	1
327	MSTRG.10042	101.905	-0.256041	0.323047	-0.792581	0.428022	1
328	MSTRG.10043	486.695	0.0436034	0.164214	0.265528	0.790602	1
329	MSTRG.10044	32.2714	0.00156248	0.559708	0.0027916	0.997773	1
330	MSTRG.10045	10.4667	-0.312094	0.934622	-0.333926	0.738436	1
331	MSTRG.10046	225.549	-0.124855	0.209961	-0.59466	0.552071	1
332	MSTRG.10048	10854.3	-0.0834538	0.0653655	-1.27672	0.2017	1
333	MSTRG.10049	19.8203	0.613692	0.669881	0.916121	0.359604	1
334	MSTRG.1005	168.414	0.00856365	0.241183	0.0355069	0.971676	1
335	MSTRG.10050	1953.94	-0.0558741	0.0909215	-0.614531	0.538864	1
336	MSTRG.10051	24.3884	0.336144	0.628045	0.535222	0.592496	1
337	MSTRG.10054	27.4301	0.298804	0.598526	0.499234	0.617615	1
338	MSTRG.10055	210.335	0.304531	0.278295	1.09427	0.273835	1
339	MSTRG.10056	191.164	-0.0853288	0.23481	-0.363395	0.71631	1
340	MSTRG.10057	3525.12	0.0208945	0.116953	0.178657	0.858207	1
341	MSTRG.10058	676.316	0.0526136	0.133739	0.393407	0.694019	1
342	MSTRG.10059	127.651	-0.196725	0.300669	-0.65429	0.512925	1
343	MSTRG.1006	2912.29	0.0932994	0.0989338	0.943048	0.345656	1
344	MSTRG.10060	153.714	-0.0800528	0.312646	-0.256049	0.797913	1
345	MSTRG.10061	1266.03	0.245425	0.125281	1.959	0.0501131	1
346	MSTRG.10064	30.0943	0.091042	0.537899	0.169255	0.865596	1
347	MSTRG.10065	391.699	-0.0565242	0.193221	-0.292537	0.769876	1
348	MSTRG.10066	2944.37	-0.065919	0.0860065	-0.766441	0.443414	1
349	MSTRG.10067	13816	-0.158557	0.0918056	-1.72709	0.0841512	1
350	MSTRG.10068	439.999	-0.0303837	0.157777	-0.192574	0.847293	1
351	MSTRG.1007	980.197	-0.14184	0.11985	-1.18348	0.236619	1
352	MSTRG.10070	696.752	-0.0592115	0.129569	-0.456987	0.64768	1
353	MSTRG.10071	1487.43	-0.00384826	0.0989186	-0.0389033	0.968967	1
354	MSTRG.10072	749.257	-0.0344216	0.123824	-0.277989	0.781021	1
355	MSTRG.10073	15.0905	0.570226	0.772769	0.7379	0.460575	1
356	MSTRG.10074	130.841	0.0360938	0.286204	0.126112	0.899643	1
357	MSTRG.10075	9.3951	-0.671957	1.10669	-0.607176	0.543734	1
358	MSTRG.10077	2318.23	-0.0544284	0.100449	-0.541852	0.58792	1
359	MSTRG.10079	1264.52	-0.0330341	0.115097	-0.287011	0.774104	1
360	MSTRG.1008	32.7319	-0.394722	0.545495	-0.723602	0.46931	1
361	MSTRG.10082	23.0037	-0.316235	0.643322	-0.491565	0.623027	1
362	MSTRG.10084	571.716	-0.0904534	0.14598	-0.619627	0.535503	1
363	MSTRG.10085	146.192	0.0879032	0.264229	0.332678	0.739377	1
364	MSTRG.10086	2466.99	-0.07775	0.0933103	-0.833242	0.404708	1
365	MSTRG.10087	364.919	0.016172	0.168023	0.0962489	0.923323	1
366	MSTRG.10088	1317.82	-0.0169373	0.103989	-0.162877	0.870615	1
367	MSTRG.1009	1999.85	-0.0479404	0.0927251	-0.517017	0.605145	1
368	MSTRG.10090	75.3415	0.0205393	0.369399	0.0556019	0.955659	1
369	MSTRG.10091	2309.36	0.0274433	0.0869521	0.315614	0.752296	1
370	MSTRG.10092	823.988	-0.025249	0.121468	-0.207865	0.835334	1
371	MSTRG.10095	14.3446	-0.469879	0.799383	-0.587803	0.556665	1
372	MSTRG.10096	22.6401	-0.712781	0.638215	-1.11684	0.264065	1
373	MSTRG.10097	927.742	-0.129299	0.120336	-1.07449	0.282603	1
374	MSTRG.10099	85.6884	0.312838	0.330185	0.947461	0.343404	1
375	MSTRG.1010	627.256	0.144073	0.152128	0.947054	0.343611	1
376	MSTRG.10100	82.3839	-0.341513	0.345716	-0.987842	0.32323	1
377	MSTRG.10101	2008.2	-0.00725923	0.0952584	-0.0762057	0.939255	1
378	MSTRG.10102	12.417	0.769329	0.947268	0.812155	0.416703	1
379	MSTRG.10103	25.9194	-0.82387	0.769346	-1.07087	0.284228	1
380	MSTRG.10105	871.808	-0.020398	0.141142	-0.144521	0.885089	1
381	MSTRG.10106	1357.31	-0.236585	0.125447	-1.88594	0.0593027	1
382	MSTRG.10107	441.415	-0.0796948	0.155032	-0.514054	0.607214	1
383	MSTRG.10108	21.5172	-0.511074	0.695446	-0.734888	0.462408	1
384	MSTRG.10109	10.4028	-0.120729	0.993985	-0.121459	0.903327	1
385	MSTRG.1011	431.27	0.0102843	0.161676	0.0636107	0.94928	1
386	MSTRG.10110	280.727	0.487703	0.279121	1.74728	0.0805886	1
387	MSTRG.10111	1687.63	-0.0483485	0.0952101	-0.507809	0.611587	1
388	MSTRG.10112	11.2808	0.406069	0.915639	0.443481	0.657418	1
389	MSTRG.10113	863.938	0.0881024	0.120814	0.729239	0.465856	1
390	MSTRG.10114	3960.91	0.0508467	0.0763545	0.66593	0.505456	1
391	MSTRG.10116	1875.55	-0.0125099	0.0921445	-0.135764	0.892008	1
392	MSTRG.10118	28.9038	-0.252259	0.553408	-0.455828	0.648513	1
393	MSTRG.1012	315.918	-0.154781	0.198669	-0.779093	0.435925	1
394	MSTRG.10120	1415.24	-0.182974	0.107664	-1.69949	0.0892276	1
395	MSTRG.10121	1230.78	0.160587	0.104924	1.5305	0.125892	1
396	MSTRG.10122	809.669	-0.0230608	0.122219	-0.188684	0.850341	1
397	MSTRG.10123	26835.5	0.0180674	0.072578	0.248937	0.803409	1
398	MSTRG.10124	1602.28	-0.000987682	0.113435	-0.008707	0.993053	1
399	MSTRG.10125	35049.4	-0.0316608	0.0756358	-0.418595	0.675512	1
400	MSTRG.10126	2328.79	-0.0577195	0.0849925	-0.679113	0.497066	1
401	MSTRG.10127	15.5801	-0.320979	0.732479	-0.438209	0.661235	1
402	MSTRG.10129	2111.46	0.0248343	0.100302	0.247596	0.804447	1
403	MSTRG.10130	178.552	0.203683	0.244917	0.831643	0.405611	1
404	MSTRG.10131	504.467	-0.0441252	0.145881	-0.302474	0.762291	1
405	MSTRG.10135	5386.01	0.0196657	0.092799	0.211917	0.832171	1
406	MSTRG.10137	23.505	0.0385824	0.724728	0.0532372	0.957543	1
407	MSTRG.1014	36.6823	0.0032159	0.508082	0.00632949	0.99495	1
408	MSTRG.10141	7.58119	-1.44816	1.55407	-0.931852	0.351413	1
409	MSTRG.10142	156.615	0.0471543	0.251159	0.187747	0.851075	1
410	MSTRG.10143	1168.6	-0.0841693	0.10889	-0.772973	0.439538	1
411	MSTRG.10144	51.5331	-0.121159	0.44004	-0.275336	0.783058	1
412	MSTRG.10149	12.5285	-0.343205	0.850308	-0.403624	0.686489	1
413	MSTRG.1015	12.8544	-0.0546126	0.829774	-0.0658163	0.947524	1
414	MSTRG.10150	991.495	-0.0307163	0.117778	-0.260798	0.794248	1
415	MSTRG.10151	14.528	0.119483	0.778366	0.153505	0.878	1
416	MSTRG.10152	42.5483	-0.0378951	0.479374	-0.0790512	0.936992	1
417	MSTRG.10153	7.6224	-0.18792	1.08979	-0.172437	0.863094	1
418	MSTRG.10154	34.7576	-0.0897076	0.514456	-0.174374	0.861572	1
419	MSTRG.10155	402.454	-0.0936655	0.163912	-0.571439	0.567702	1
420	MSTRG.10156	3898.74	-0.131355	0.0787024	-1.669	0.0951164	1
421	MSTRG.10157	48.9653	-0.277337	0.441385	-0.628335	0.529785	1
422	MSTRG.10159	94.9098	-0.340189	0.307056	-1.1079	0.267903	1
423	MSTRG.1016	889.83	0.146984	0.118953	1.23565	0.216588	1
424	MSTRG.10160	140.026	-0.0157482	0.279522	-0.0563398	0.955071	1
425	MSTRG.10161	131.767	0.289189	0.279111	1.03611	0.300152	1
426	MSTRG.10162	7744.75	-0.0615261	0.0945642	-0.650628	0.515287	1
427	MSTRG.10163	1187.77	0.251448	0.114818	2.18997	0.0285267	1
428	MSTRG.10164	525.447	-0.173033	0.151958	-1.13869	0.254831	1
429	MSTRG.10165	340.382	0.0237288	0.177708	0.133527	0.893777	1
430	MSTRG.10166	261.593	-0.161704	0.19607	-0.824724	0.409528	1
431	MSTRG.10168	912.813	-0.008084	0.124899	-0.0647245	0.948393	1
432	MSTRG.1017	91.6606	-0.0669745	0.336425	-0.199077	0.842203	1
433	MSTRG.10170	385.552	-0.0366728	0.167673	-0.218717	0.826871	1
434	MSTRG.10171	608.472	0.224367	0.162265	1.38272	0.166751	1
435	MSTRG.10172	973.956	-0.000980899	0.116097	-0.00844894	0.993259	1
436	MSTRG.10173	75.5264	-0.0846512	0.371398	-0.227926	0.819704	1
437	MSTRG.10175	26.7743	0.126633	0.601919	0.210382	0.83337	1
438	MSTRG.10177	112.978	0.0131158	0.293065	0.0447539	0.964303	1
439	MSTRG.10178	192.538	0.00168651	0.223251	0.00755434	0.993973	1
440	MSTRG.10179	38.3145	-0.403102	0.510898	-0.789007	0.430108	1
441	MSTRG.1018	7.46588	0.79166	1.1104	0.712953	0.475875	1
442	MSTRG.10180	42.4209	0.205101	0.481351	0.426093	0.67004	1
443	MSTRG.10181	598.304	0.153466	0.139918	1.09683	0.272718	1
444	MSTRG.10182	2478.73	-0.137181	0.115779	-1.18485	0.236077	1
445	MSTRG.10183	2091.47	0.0222565	0.0898702	0.247652	0.804404	1
446	MSTRG.10184	804.131	-0.0398261	0.126501	-0.314828	0.752892	1
447	MSTRG.10187	1522.14	0.00543526	0.100063	0.0543182	0.956682	1
448	MSTRG.10188	348.126	-0.0455108	0.197341	-0.23062	0.81761	1
449	MSTRG.1019	274.595	-0.00753389	0.196987	-0.0382456	0.969492	1
450	MSTRG.10190	428.549	-0.0889764	0.160564	-0.554149	0.579477	1
451	MSTRG.10193	16.526	0.670411	0.741073	0.904649	0.365651	1
452	MSTRG.10194	116.089	-0.101906	0.336154	-0.303153	0.761774	1
453	MSTRG.10195	943.007	-0.0809624	0.124389	-0.650879	0.515125	1
454	MSTRG.10197	1006.35	-0.016441	0.112566	-0.146056	0.883877	1
455	MSTRG.10199	989.493	-0.0599484	0.118072	-0.507726	0.611645	1
456	MSTRG.102	3492.85	0.0401019	0.0955419	0.419731	0.674682	1
457	MSTRG.10200	205.91	-0.196063	0.223971	-0.875395	0.381359	1
458	MSTRG.10201	167.364	-0.102592	0.26137	-0.392516	0.694677	1
459	MSTRG.10202	84.4232	0.038335	0.398674	0.0961561	0.923397	1
460	MSTRG.10203	69.7204	-0.68402	0.497843	-1.37397	0.169452	1
461	MSTRG.10204	115.7	-0.598135	0.841215	-0.711038	0.477061	1
462	MSTRG.10205	1683.08	-0.0961454	0.0957727	-1.00389	0.315431	1
463	MSTRG.10206	167.449	-0.222462	0.238519	-0.932682	0.350984	1
464	MSTRG.10207	1509.98	0.0104322	0.0986068	0.105796	0.915744	1
465	MSTRG.10208	17081.5	0.000768725	0.0635291	0.0121004	0.990346	1
466	MSTRG.10209	21.1884	0.0743965	0.688912	0.107991	0.914003	1
467	MSTRG.1021	15.7391	-0.610542	0.788805	-0.774009	0.438926	1
468	MSTRG.10210	162.746	-0.587409	0.314408	-1.8683	0.06172	1
469	MSTRG.10213	62.7916	-0.130594	0.438213	-0.298015	0.765692	1
470	MSTRG.10215	81.8768	0.085091	0.368095	0.231166	0.817186	1
471	MSTRG.10216	30.5816	-0.752427	0.547655	-1.37391	0.16947	1
472	MSTRG.10217	342.566	0.0247191	0.181321	0.136328	0.891562	1
473	MSTRG.10218	74.4709	-0.0738044	0.406273	-0.181662	0.855848	1
474	MSTRG.10220	202.73	0.0989983	0.238201	0.415608	0.677697	1
475	MSTRG.10221	219.221	0.51746	0.245698	2.10609	0.0351969	1
476	MSTRG.10223	611.757	-0.00461872	0.149921	-0.0308078	0.975423	1
477	MSTRG.10225	10.057	0.713583	1.25136	0.570246	0.568511	1
478	MSTRG.10227	1219.05	-0.263535	0.132645	-1.98677	0.0469481	1
479	MSTRG.10228	722.34	-0.00633103	0.137128	-0.0461688	0.963176	1
480	MSTRG.1023	42.005	0.332292	0.482963	0.688028	0.491435	1
481	MSTRG.10230	464.495	0.0480893	0.152381	0.315585	0.752318	1
482	MSTRG.10232	385.93	0.246373	0.217753	1.13143	0.257873	1
483	MSTRG.10234	613.832	-0.0611256	0.143214	-0.426814	0.669514	1
484	MSTRG.10235	7.69664	-0.67184	1.1914	-0.563906	0.572818	1
485	MSTRG.10236	277.357	-0.268482	0.196577	-1.36579	0.172006	1
486	MSTRG.10237	291.637	-0.366898	0.206016	-1.78092	0.0749254	1
487	MSTRG.10238	9.05715	0.668617	1.04079	0.642416	0.520603	1
488	MSTRG.10239	1675.4	-0.0384951	0.108848	-0.35366	0.723594	1
489	MSTRG.1024	920.816	-0.151654	0.191117	-0.793514	0.427478	1
490	MSTRG.10240	49.5119	0.06333	0.50942	0.124318	0.901064	1
491	MSTRG.10241	4752.22	-0.189291	0.0948609	-1.99545	0.0459933	1
492	MSTRG.10242	833.146	0.032767	0.127019	0.257968	0.796431	1
493	MSTRG.10243	396.935	-0.0789896	0.180285	-0.438137	0.661287	1
494	MSTRG.10244	328.452	0.0245062	0.178537	0.137261	0.890825	1
495	MSTRG.10245	282.235	0.229651	0.201444	1.14002	0.254277	1
496	MSTRG.10246	147.826	0.278655	0.295587	0.94272	0.345824	1
497	MSTRG.10248	169.135	-0.325673	0.30518	-1.06715	0.285904	1
498	MSTRG.10249	483.765	0.146258	0.156733	0.933172	0.350731	1
499	MSTRG.10250	296.193	-0.189462	0.183714	-1.03129	0.302405	1
500	MSTRG.10251	76.3701	-0.423855	0.361082	-1.17385	0.240457	1
501	MSTRG.10255	147.536	0.0728839	0.254428	0.286462	0.774524	1
502	MSTRG.10256	2399.95	-0.0424707	0.0929051	-0.45714	0.64757	1
503	MSTRG.10257	12.1882	0.285444	0.853796	0.334323	0.738136	1
504	MSTRG.10258	335.253	-0.227637	0.20102	-1.13241	0.257461	1
505	MSTRG.10259	8.19732	-0.114128	1.03299	-0.110483	0.912027	1
506	MSTRG.10261	7.953	-0.0972465	1.17449	-0.0827986	0.934012	1
507	MSTRG.10262	100.966	-1.7361	1.47321	-1.17844	0.23862	1
508	MSTRG.10263	211.589	-0.157471	0.297062	-0.530096	0.596046	1
509	MSTRG.10264	266.088	0.134054	0.228588	0.586441	0.557579	1
510	MSTRG.10269	1505.85	-0.0730568	0.0991901	-0.736533	0.461406	1
511	MSTRG.1027	1199.98	-0.0576095	0.112998	-0.50983	0.610171	1
512	MSTRG.10272	32.0197	0.0651515	0.649536	0.100305	0.920102	1
513	MSTRG.10275	8.25798	0.533778	1.09631	0.486884	0.62634	1
514	MSTRG.10277	11.422	0.505973	0.881374	0.574073	0.565918	1
515	MSTRG.10278	816.389	-0.0973089	0.138135	-0.704449	0.481153	1
516	MSTRG.10279	96.5693	0.0679744	0.314396	0.216206	0.828827	1
517	MSTRG.1028	631.383	-0.147923	0.142253	-1.03986	0.298405	1
518	MSTRG.10282	4586.89	-0.111802	0.0796	-1.40455	0.160155	1
519	MSTRG.10283	2183.77	0.0652578	0.089754	0.727074	0.467181	1
520	MSTRG.10284	1658.6	-0.0134902	0.0944998	-0.142754	0.886484	1
521	MSTRG.10285	1434.34	-0.0341327	0.112494	-0.303417	0.761572	1
522	MSTRG.10287	594.444	-0.137288	0.137392	-0.999237	0.31768	1
523	MSTRG.10288	21.0076	0.32514	0.669385	0.485729	0.627159	1
524	MSTRG.10289	978.626	-0.0534632	0.113001	-0.473121	0.636127	1
525	MSTRG.1029	6372.03	-0.0938694	0.0817302	-1.14853	0.250751	1
526	MSTRG.10290	7.09032	0.331059	1.12258	0.29491	0.768063	1
527	MSTRG.10291	421.375	0.0266876	0.16908	0.15784	0.874583	1
528	MSTRG.10293	1518.2	-0.0666868	0.0997151	-0.668774	0.50364	1
529	MSTRG.10294	1915.09	-0.061567	0.0945761	-0.650979	0.51506	1
530	MSTRG.10295	1580.96	0.143948	0.109481	1.31482	0.188571	1
531	MSTRG.10296	492.201	-0.199975	0.156251	-1.27983	0.200604	1
532	MSTRG.10298	29.1277	-0.0697442	0.623556	-0.111849	0.910943	1
533	MSTRG.10299	324.621	0.0139245	0.178709	0.077917	0.937894	1
534	MSTRG.103	576.093	0.161786	0.147483	1.09698	0.27265	1
535	MSTRG.1030	94.9145	0.324779	0.349989	0.927969	0.353424	1
536	MSTRG.10300	162.167	0.387983	0.252115	1.53891	0.123826	1
537	MSTRG.10301	12.6182	0.275526	0.834517	0.330163	0.741277	1
538	MSTRG.10302	9.01781	0.19337	0.985196	0.196276	0.844394	1
539	MSTRG.10303	49.1847	0.17791	0.445434	0.399408	0.689593	1
540	MSTRG.10304	614.076	-0.0112759	0.144914	-0.0778107	0.937979	1
541	MSTRG.10305	352.722	-0.0413722	0.181932	-0.227404	0.82011	1
542	MSTRG.10306	30.0188	-0.117284	0.569618	-0.205899	0.83687	1
543	MSTRG.10307	41.843	0.0380348	0.465707	0.0816711	0.934908	1
544	MSTRG.10308	137.888	0.153896	0.293986	0.523482	0.600639	1
545	MSTRG.1031	283.516	-0.0651992	0.195863	-0.332882	0.739223	1
546	MSTRG.10310	21141.5	0.108388	0.0976421	1.11006	0.266974	1
547	MSTRG.10311	2798.74	0.0531556	0.0865427	0.614213	0.539075	1
548	MSTRG.10313	3611.4	-0.0344278	0.0820789	-0.419448	0.674889	1
549	MSTRG.10314	726.302	-0.174399	0.132512	-1.31609	0.188142	1
550	MSTRG.10318	144.904	-0.201956	0.259255	-0.778986	0.435988	1
551	MSTRG.10319	225.817	-0.210329	0.211207	-0.995843	0.319326	1
552	MSTRG.1032	42.5792	-0.158762	0.463802	-0.342305	0.732121	1
553	MSTRG.10320	1151.73	-0.032422	0.11647	-0.278372	0.780727	1
554	MSTRG.10321	1407.14	-0.127851	0.109027	-1.17265	0.240934	1
555	MSTRG.10322	266.369	-0.234508	0.236186	-0.992894	0.320762	1
556	MSTRG.10323	12.3468	0.505691	0.837261	0.603982	0.545856	1
557	MSTRG.10324	155.8	0.0523086	0.266357	0.196385	0.844309	1
558	MSTRG.10325	292.194	0.0767394	0.232962	0.329408	0.741847	1
559	MSTRG.10327	33.9863	0.00751444	0.562317	0.0133633	0.989338	1
560	MSTRG.10328	104.059	-0.367006	0.319874	-1.14735	0.251239	1
561	MSTRG.10329	965.526	-0.0821868	0.121737	-0.675116	0.499602	1
562	MSTRG.1033	13.723	-1.18059	0.878806	-1.34341	0.17914	1
563	MSTRG.10330	147.058	0.358608	0.277094	1.29417	0.195605	1
564	MSTRG.10332	573.138	-0.287693	0.140162	-2.05257	0.0401139	1
565	MSTRG.10333	369.081	-0.15089	0.169762	-0.888833	0.374093	1
566	MSTRG.10334	210.476	-0.0173148	0.243348	-0.0711525	0.943276	1
567	MSTRG.10335	394.709	-0.108758	0.170628	-0.637399	0.523865	1
568	MSTRG.10336	1910.58	-0.0864947	0.0920874	-0.939267	0.347594	1
569	MSTRG.10337	124.288	-0.0847114	0.291081	-0.291023	0.771034	1
570	MSTRG.10339	236.065	0.00748643	0.226766	0.0330138	0.973664	1
571	MSTRG.1034	7.68548	-1.32587	1.14322	-1.15977	0.246144	1
572	MSTRG.10340	694.829	-0.107652	0.134478	-0.800516	0.423412	1
573	MSTRG.10342	30.7912	0.324668	0.533804	0.608216	0.543044	1
574	MSTRG.10343	7.65165	-1.52191	1.50136	-1.01369	0.310732	1
575	MSTRG.10344	1334.32	-0.0466951	0.126601	-0.368836	0.71225	1
576	MSTRG.10345	32.0461	0.137414	0.546249	0.251559	0.801382	1
577	MSTRG.10346	13.0587	-0.648489	0.83226	-0.779191	0.435867	1
578	MSTRG.10347	1316.42	-0.0603993	0.117197	-0.515367	0.606297	1
579	MSTRG.10348	175.307	-0.21711	0.287301	-0.755688	0.449836	1
580	MSTRG.10349	1621.09	-0.0307647	0.101517	-0.303051	0.761851	1
581	MSTRG.1035	200.368	-0.400728	0.269449	-1.48721	0.136959	1
582	MSTRG.10350	9.24987	-0.46715	0.98694	-0.473332	0.635976	1
583	MSTRG.10353	119.459	-0.305369	0.2806	-1.08827	0.276476	1
584	MSTRG.10354	5477.15	-0.0069281	0.0790677	-0.0876223	0.930177	1
585	MSTRG.10358	892.938	-0.122213	0.148457	-0.823221	0.410382	1
586	MSTRG.1036	6063.27	-0.0488323	0.0960969	-0.508157	0.611343	1
587	MSTRG.10360	216.535	-0.124437	0.273556	-0.454885	0.649192	1
588	MSTRG.10361	14.8616	0.390703	0.843844	0.463003	0.643362	1
589	MSTRG.10363	22.6934	0.189554	0.670758	0.282597	0.777486	1
590	MSTRG.10364	517.551	0.00529328	0.152737	0.0346563	0.972354	1
591	MSTRG.10365	3027.47	-0.0644929	0.0804294	-0.801857	0.422636	1
592	MSTRG.10366	36.0513	-0.0525465	0.507099	-0.103622	0.917469	1
593	MSTRG.10367	42.6814	0.121469	0.500899	0.242503	0.80839	1
594	MSTRG.10368	213.851	0.307858	0.230194	1.33738	0.181098	1
595	MSTRG.10369	193.242	-0.0440691	0.234964	-0.187557	0.851224	1
596	MSTRG.1037	79.1442	0.290107	0.355247	0.816636	0.414137	1
597	MSTRG.10370	27.1564	0.0298609	0.585223	0.0510249	0.959306	1
598	MSTRG.10371	48.034	0.302728	0.446645	0.677782	0.49791	1
599	MSTRG.10372	427.095	-0.118715	0.158199	-0.750418	0.453003	1
600	MSTRG.10373	973.768	0.102172	0.116006	0.88075	0.378453	1
601	MSTRG.10374	8.28335	0.148907	1.02686	0.145012	0.884702	1
602	MSTRG.10375	1557.82	0.00794842	0.0960438	0.0827583	0.934044	1
603	MSTRG.10376	5191.53	-0.0605627	0.0806525	-0.750908	0.452708	1
604	MSTRG.10377	25.7792	0.163076	0.594741	0.274197	0.783933	1
605	MSTRG.10379	2399.79	-0.0942771	0.0870168	-1.08344	0.278615	1
606	MSTRG.1038	13.2754	-0.15368	0.863102	-0.178055	0.85868	1
607	MSTRG.10380	6980.32	0.00130688	0.0753929	0.0173343	0.98617	1
608	MSTRG.10381	2963.43	0.158406	0.0828017	1.91308	0.0557377	1
609	MSTRG.10383	1462.94	-0.0623494	0.126251	-0.493855	0.621409	1
610	MSTRG.10384	8.53279	-0.976096	1.12538	-0.86735	0.385751	1
611	MSTRG.10385	3568.69	-0.0685699	0.0787687	-0.870522	0.384015	1
612	MSTRG.10386	29.9351	-0.0826569	0.587601	-0.140668	0.888132	1
613	MSTRG.10387	245.402	-0.261074	0.21732	-1.20133	0.229623	1
614	MSTRG.10388	18.427	-0.486275	0.720054	-0.675332	0.499465	1
615	MSTRG.1039	296.512	-0.0688301	0.185041	-0.371972	0.709914	1
616	MSTRG.10393	1821.27	-0.0872105	0.0950748	-0.917283	0.358994	1
617	MSTRG.10395	2617.42	-0.528676	0.690768	-0.765345	0.444066	1
618	MSTRG.10396	489.268	-0.363809	0.790133	-0.460441	0.6452	1
619	MSTRG.10397	51.0648	-0.203923	0.42705	-0.477515	0.632996	1
620	MSTRG.10398	281.812	-0.196605	0.200518	-0.980484	0.326847	1
621	MSTRG.10399	30.7549	-0.167971	0.661159	-0.254055	0.799453	1
622	MSTRG.104	1533.02	-0.191066	0.0999646	-1.91133	0.0559618	1
623	MSTRG.1040	14.4497	-0.00164798	0.764266	-0.0021563	0.99828	1
624	MSTRG.10400	693.619	-0.0616877	0.132037	-0.4672	0.640357	1
625	MSTRG.10401	222.257	-0.417882	0.226936	-1.84141	0.0655612	1
626	MSTRG.10404	12.648	0.198424	0.824905	0.240541	0.809911	1
627	MSTRG.10405	117.01	2.21777	2.97219	0.746174	0.455562	1
628	MSTRG.10406	353.864	0.248746	0.172599	1.44118	0.149533	1
629	MSTRG.10407	7.58813	-0.295966	1.049	-0.282142	0.777835	1
630	MSTRG.10408	280.176	-0.000142446	0.214642	-0.000663646	0.99947	1
631	MSTRG.10409	1234.06	-0.0931281	0.108635	-0.857259	0.391302	1
632	MSTRG.1041	3376.15	-0.188256	0.0926192	-2.03258	0.0420947	1
633	MSTRG.10410	30.0683	0.0321906	0.547532	0.0587922	0.953118	1
634	MSTRG.10411	70.7412	-0.000382366	0.386491	-0.000989327	0.999211	1
635	MSTRG.10412	35.1197	-0.963904	0.568375	-1.69589	0.0899061	1
636	MSTRG.10413	34.1035	0.433029	0.51675	0.837985	0.402039	1
637	MSTRG.10414	13.908	0.119904	0.832156	0.144089	0.88543	1
638	MSTRG.10415	788.256	0.161765	0.154022	1.05028	0.293591	1
639	MSTRG.10416	46.9276	0.246722	0.480003	0.514001	0.607251	1
640	MSTRG.10417	903.733	-0.101278	0.140357	-0.721578	0.470554	1
641	MSTRG.10419	4172.32	-0.0646977	0.0780515	-0.82891	0.407155	1
642	MSTRG.1042	80.2872	-0.179232	0.351404	-0.510045	0.61002	1
643	MSTRG.10420	1346.56	0.013636	0.109468	0.124565	0.900868	1
644	MSTRG.10421	1204.21	-0.0935907	0.109604	-0.853895	0.393163	1
645	MSTRG.10422	158.551	-0.276264	0.25041	-1.10325	0.26992	1
646	MSTRG.10424	447.974	-0.126361	0.165989	-0.761261	0.446501	1
647	MSTRG.10426	1954.47	-0.0152475	0.0923509	-0.165104	0.868862	1
648	MSTRG.10428	1200.72	-0.166355	0.105302	-1.57979	0.114154	1
649	MSTRG.10429	516.643	0.228158	0.173736	1.31325	0.189099	1
650	MSTRG.1043	119.784	0.0660062	0.309697	0.213131	0.831225	1
651	MSTRG.10430	3370.22	0.0322669	0.0820805	0.393113	0.694236	1
652	MSTRG.10431	1793	-0.107852	0.0996729	-1.08206	0.279225	1
653	MSTRG.10432	17.8514	1.55899	0.827759	1.88338	0.0596483	1
654	MSTRG.10433	579.18	-0.147327	0.144678	-1.01831	0.308532	1
655	MSTRG.10436	63.9062	-0.312967	0.38578	-0.811256	0.417219	1
656	MSTRG.10439	17.4747	0.0903946	0.752074	0.120194	0.90433	1
657	MSTRG.1044	20.7657	0.607889	0.690873	0.879886	0.378921	1
658	MSTRG.10440	4045.06	-0.0417756	0.0758494	-0.55077	0.581791	1
659	MSTRG.10443	33.8397	0.105763	0.5697	0.185647	0.852722	1
660	MSTRG.10446	2728.95	-0.102094	0.0849327	-1.20206	0.22934	1
661	MSTRG.1045	26.9938	0.340198	0.598717	0.568211	0.569892	1
662	MSTRG.10450	50.0822	0.0879353	0.434577	0.202347	0.839645	1
663	MSTRG.10451	289.81	0.121344	0.188602	0.643385	0.519974	1
664	MSTRG.10452	21288	-0.0425705	0.0690644	-0.616389	0.537638	1
665	MSTRG.10453	529.305	-0.0204802	0.159888	-0.12809	0.898078	1
666	MSTRG.10454	13.4707	-0.385839	0.889488	-0.433776	0.664451	1
667	MSTRG.10455	859.4	-0.0765174	0.137198	-0.557716	0.577038	1
668	MSTRG.10458	909.416	-0.0925445	0.132843	-0.696646	0.486024	1
669	MSTRG.1046	3448.8	-0.0373813	0.0965546	-0.387152	0.698644	1
670	MSTRG.10461	1832.86	0.210673	0.102737	2.0506	0.0403059	1
671	MSTRG.10463	2648.44	-0.0492766	0.0851475	-0.57872	0.562778	1
672	MSTRG.10465	459.17	-0.0319407	0.152917	-0.208877	0.834545	1
673	MSTRG.10466	28.957	-0.0158625	0.616908	-0.0257129	0.979486	1
674	MSTRG.10467	267.062	0.0900405	0.195597	0.460337	0.645274	1
675	MSTRG.10468	534.17	-0.0922584	0.195962	-0.470798	0.637785	1
676	MSTRG.1047	7734.58	-0.135061	0.0756048	-1.7864	0.0740343	1
677	MSTRG.10470	799.546	-0.122018	0.155332	-0.78553	0.432143	1
678	MSTRG.10471	195.351	0.240831	0.233355	1.03204	0.302055	1
679	MSTRG.10472	223.955	0.100377	0.231757	0.433112	0.664934	1
680	MSTRG.10474	14.2692	-0.0127522	0.793499	-0.0160708	0.987178	1
681	MSTRG.10475	95.3113	-0.222145	0.3594	-0.6181	0.536509	1
682	MSTRG.10476	57.9598	0.0372439	0.399073	0.0933261	0.925645	1
683	MSTRG.10478	214.901	-0.0776694	0.22455	-0.345889	0.729426	1
684	MSTRG.10479	11405.5	-0.118042	0.0676973	-1.74368	0.0812155	1
685	MSTRG.10480	111.374	-0.0130199	0.286826	-0.045393	0.963794	1
686	MSTRG.10481	21.536	-0.611703	0.692664	-0.883117	0.377173	1
687	MSTRG.10482	2619.84	0.0869447	0.0927981	0.936923	0.348798	1
688	MSTRG.10484	775.16	-0.176045	0.142765	-1.23311	0.217535	1
689	MSTRG.10487	1915.9	0.0775936	0.0970939	0.79916	0.424197	1
690	MSTRG.10488	1339.06	-0.0603863	0.106082	-0.56924	0.569194	1
691	MSTRG.10489	697.616	-0.267277	0.13596	-1.96585	0.0493154	1
692	MSTRG.10490	18.2109	-0.0034754	0.759037	-0.0045787	0.996347	1
693	MSTRG.10491	487.244	0.147202	0.148319	0.992471	0.320968	1
694	MSTRG.10492	874.928	-0.100759	0.126149	-0.798731	0.424446	1
695	MSTRG.10493	1450.75	0.110881	0.167723	0.661092	0.508553	1
696	MSTRG.10494	364.348	0.0619287	0.177994	0.347925	0.727897	1
697	MSTRG.10496	3069.23	-0.0383201	0.0806054	-0.475404	0.634499	1
698	MSTRG.10497	37.6113	0.112165	0.520227	0.215607	0.829294	1
699	MSTRG.10498	55.9992	-0.638349	0.470911	-1.35556	0.175239	1
700	MSTRG.105	1088.81	0.0854198	0.13551	0.630356	0.528461	1
701	MSTRG.1050	14513.2	0.115851	0.0867443	1.33555	0.181698	1
702	MSTRG.10501	3648.5	-0.1679	0.112643	-1.49055	0.13608	1
703	MSTRG.10502	287.443	-0.141656	0.214239	-0.661204	0.508481	1
704	MSTRG.10503	43.4334	-0.0618872	0.496571	-0.124629	0.900817	1
705	MSTRG.10504	8564.31	-0.0214119	0.071259	-0.30048	0.763811	1
706	MSTRG.10505	53.0128	-0.155971	0.41977	-0.371564	0.710217	1
707	MSTRG.10506	30.8063	-0.241666	0.577231	-0.418665	0.675461	1
708	MSTRG.10507	259.998	0.215963	0.200018	1.07972	0.280267	1
709	MSTRG.10508	160.551	-0.138413	0.246599	-0.56129	0.5746	1
710	MSTRG.1051	18.6383	0.9133	0.713949	1.27922	0.200818	1
711	MSTRG.10510	314.065	0.273096	0.189842	1.43854	0.150281	1
712	MSTRG.10511	345.881	0.1132	0.224792	0.503576	0.614559	1
713	MSTRG.10512	135.617	-0.557503	0.378021	-1.4748	0.140267	1
714	MSTRG.10513	1094.08	-0.0631132	0.118488	-0.532655	0.594272	1
715	MSTRG.10514	964.518	0.0155595	0.116721	0.133305	0.893952	1
716	MSTRG.10515	165.924	-0.0703166	0.237903	-0.295568	0.76756	1
717	MSTRG.10517	1167.32	-0.0768135	0.111302	-0.690135	0.49011	1
718	MSTRG.10519	408.279	-0.119208	0.176364	-0.67592	0.499091	1
719	MSTRG.1052	41.6523	-0.200924	0.489286	-0.410647	0.681332	1
720	MSTRG.10520	268.118	0.0142848	0.205374	0.069555	0.944548	1
721	MSTRG.10521	725.581	-0.105042	0.135944	-0.772689	0.439707	1
722	MSTRG.10522	83.4129	0.182517	0.379397	0.481073	0.630465	1
723	MSTRG.10523	394.532	0.0420396	0.176868	0.237688	0.812123	1
724	MSTRG.10524	463.049	-0.0270674	0.152359	-0.177656	0.858993	1
725	MSTRG.10525	8120.17	-0.0852345	0.0726228	-1.17366	0.240531	1
726	MSTRG.10527	1935.07	-0.101182	0.0929531	-1.08852	0.276364	1
727	MSTRG.10528	8501.36	-0.0278063	0.0744999	-0.373239	0.708971	1
728	MSTRG.10529	1062.76	-0.252456	0.110362	-2.28754	0.0221644	1
729	MSTRG.1053	324.704	-0.0745877	0.182058	-0.409692	0.682032	1
730	MSTRG.10531	3509.57	0.151689	0.104001	1.45853	0.144694	1
731	MSTRG.10532	1178.18	-0.199529	0.133786	-1.49141	0.135854	1
732	MSTRG.10533	2460.02	-0.0201499	0.0848239	-0.23755	0.81223	1
733	MSTRG.10534	523.698	-0.0144575	0.154485	-0.093585	0.925439	1
734	MSTRG.10536	205.167	-0.0633595	0.226424	-0.279827	0.77961	1
735	MSTRG.10537	200.987	0.0780604	0.225045	0.346865	0.728693	1
736	MSTRG.10539	544.803	-0.0390059	0.147273	-0.264855	0.791121	1
737	MSTRG.1054	6592.29	-0.0149719	0.0737596	-0.202982	0.839149	1
738	MSTRG.10540	1040.07	-0.0468341	0.117337	-0.399142	0.689788	1
739	MSTRG.10541	162.056	0.0345495	0.245987	0.140453	0.888302	1
740	MSTRG.10542	201.762	-0.137121	0.250195	-0.548057	0.583653	1
741	MSTRG.10543	118.6	0.0131351	0.296224	0.0443418	0.964632	1
742	MSTRG.10546	233.615	-0.14878	0.212779	-0.699223	0.484412	1
743	MSTRG.10547	1947.94	-0.00429414	0.0941042	-0.0456318	0.963604	1
744	MSTRG.10549	980.461	-0.202492	0.12319	-1.64374	0.100231	1
745	MSTRG.10550	131.607	0.312797	0.282397	1.10765	0.268012	1
746	MSTRG.10551	118.161	0.0899183	0.297764	0.301978	0.762669	1
747	MSTRG.10552	255.338	0.0102846	0.219957	0.0467573	0.962707	1
748	MSTRG.10553	725.346	-0.0895388	0.13322	-0.672113	0.501512	1
749	MSTRG.10554	12.0913	0.0691263	0.903611	0.0765	0.939021	1
750	MSTRG.10557	914.725	0.0926754	0.12965	0.714813	0.474725	1
751	MSTRG.10558	1476.88	-0.0742076	0.101295	-0.732591	0.463808	1
752	MSTRG.10559	836.074	-0.0182504	0.122577	-0.148889	0.881642	1
753	MSTRG.1056	210.713	-0.342017	0.268476	-1.27392	0.202692	1
754	MSTRG.10560	604.8	0.16333	0.136761	1.19428	0.232369	1
755	MSTRG.10561	848.654	0.044879	0.172784	0.259741	0.795064	1
756	MSTRG.10562	302.494	-0.121685	0.179961	-0.676174	0.49893	1
757	MSTRG.10563	5882.06	0.36853	0.366812	1.00468	0.315049	1
758	MSTRG.10564	309.783	0.314596	0.608443	0.51705	0.605121	1
759	MSTRG.10565	17.6386	-0.628647	0.720903	-0.872027	0.383193	1
760	MSTRG.10566	43.0468	-0.0950799	0.495911	-0.191728	0.847956	1
761	MSTRG.10568	956.665	-0.0232451	0.113373	-0.205033	0.837547	1
762	MSTRG.10570	1868.13	-0.0950698	0.112302	-0.846558	0.397242	1
763	MSTRG.10571	1553.2	-0.0720214	0.0981749	-0.733603	0.463191	1
764	MSTRG.10572	74.5658	-0.339464	0.345801	-0.981675	0.32626	1
765	MSTRG.10573	1912.37	-0.0611301	0.0975109	-0.626906	0.530721	1
766	MSTRG.10576	1699.5	-0.0481218	0.105038	-0.458136	0.646855	1
767	MSTRG.10577	20.6869	-0.448269	0.684792	-0.654607	0.512721	1
768	MSTRG.10578	318.626	-0.423298	0.201091	-2.10501	0.0352902	1
769	MSTRG.10579	1445.71	-0.209439	0.127256	-1.6458	0.0998045	1
770	MSTRG.1058	790.89	-0.0641298	0.128263	-0.499986	0.617085	1
771	MSTRG.10580	545.967	0.0859568	0.153769	0.558999	0.576162	1
772	MSTRG.10581	39.4566	-0.118502	0.482498	-0.245601	0.805991	1
773	MSTRG.10582	615.261	0.072593	0.136522	0.53173	0.594913	1
774	MSTRG.10583	1759.58	0.0865717	0.102119	0.847754	0.396575	1
775	MSTRG.10585	1222.59	0.0488634	0.113546	0.430339	0.666949	1
776	MSTRG.10586	53.8736	1.47715	2.73713	0.539673	0.589422	1
777	MSTRG.10587	13039.8	-0.0680993	0.065915	-1.03314	0.301539	1
778	MSTRG.10588	111.534	-0.23912	0.313932	-0.761693	0.446243	1
779	MSTRG.10589	10.0808	-5.9879	4.79384	-1.24908	0.211635	1
780	MSTRG.1059	36.2953	0.711409	0.538155	1.32194	0.186188	1
781	MSTRG.10590	144.877	0.134747	0.272774	0.493988	0.621315	1
782	MSTRG.10592	35.2088	-0.198712	0.506004	-0.392708	0.694535	1
783	MSTRG.10594	4369.46	-0.147886	0.0867797	-1.70415	0.0883523	1
784	MSTRG.10595	777.197	0.15775	0.12539	1.25807	0.208365	1
785	MSTRG.10596	206.477	-0.0934021	0.229175	-0.407557	0.683599	1
786	MSTRG.10597	144.921	0.0621119	0.264139	0.235148	0.814094	1
787	MSTRG.10598	62.282	-0.0619716	0.391746	-0.158193	0.874304	1
788	MSTRG.10599	456.556	-0.0980078	0.159305	-0.61522	0.53841	1
789	MSTRG.106	1338.16	-0.0767994	0.143804	-0.534058	0.593302	1
790	MSTRG.1060	157.566	-0.111386	0.253566	-0.439278	0.66046	1
791	MSTRG.10600	11.3344	0.0136678	0.930745	0.0146848	0.988284	1
792	MSTRG.10601	21.8029	0.62589	0.639743	0.978346	0.327903	1
793	MSTRG.10602	10.6367	-0.598469	0.976748	-0.612716	0.540064	1
794	MSTRG.10603	252.415	-0.115851	0.206462	-0.561123	0.574714	1
795	MSTRG.10604	846.237	-0.0490986	0.133979	-0.366466	0.714018	1
796	MSTRG.10605	752.336	-0.1146	0.125046	-0.916459	0.359426	1
797	MSTRG.10608	22.3337	-0.173371	0.627424	-0.276322	0.782301	1
798	MSTRG.10609	87.8526	0.30522	0.326555	0.934668	0.34996	1
799	MSTRG.1061	101.76	0.224878	0.307846	0.730487	0.465092	1
800	MSTRG.10610	388.336	0.0794334	0.165696	0.479392	0.63166	1
801	MSTRG.10612	55.3649	-0.294831	0.416418	-0.708016	0.478935	1
802	MSTRG.10613	9.88821	0.460924	0.945194	0.48765	0.625798	1
803	MSTRG.10614	12.4654	-0.313685	0.875626	-0.358241	0.720163	1
804	MSTRG.10615	6520.85	-0.067667	0.0737174	-0.917924	0.358659	1
805	MSTRG.10616	706.686	-0.0631994	0.137419	-0.459903	0.645586	1
806	MSTRG.10618	131.751	0.607025	0.316941	1.91526	0.0554594	1
807	MSTRG.10619	1706.8	-0.100292	0.100188	-1.00103	0.316811	1
808	MSTRG.1062	297.352	-0.0385735	0.193759	-0.19908	0.8422	1
809	MSTRG.10620	664.396	-0.018171	0.132303	-0.137344	0.890759	1
810	MSTRG.10621	9.04582	2.87825	1.23662	2.32751	0.019938	1
811	MSTRG.10622	69.2548	0.0212455	0.391592	0.0542543	0.956733	1
812	MSTRG.10623	87.6266	0.0315572	0.338699	0.0931717	0.925767	1
813	MSTRG.10624	1010.65	0.0436795	0.115181	0.379225	0.704521	1
814	MSTRG.10625	3389.09	-0.0959662	0.272049	-0.352754	0.724273	1
815	MSTRG.10626	9.80896	-0.728259	0.973624	-0.747988	0.454468	1
816	MSTRG.10627	171.549	-0.20843	0.245465	-0.849124	0.395812	1
817	MSTRG.10628	34.0318	-0.156941	0.517002	-0.30356	0.761463	1
818	MSTRG.1063	661.983	0.0330005	0.132982	0.248157	0.804013	1
819	MSTRG.10630	1419.3	0.0869973	0.109198	0.796693	0.42563	1
820	MSTRG.10631	250.487	0.0877657	0.208241	0.421462	0.673418	1
821	MSTRG.10632	58.9731	0.482534	0.400132	1.20594	0.227842	1
822	MSTRG.10633	1872.03	-0.0734546	0.0974867	-0.753483	0.45116	1
823	MSTRG.10634	360.48	-0.0167246	0.178602	-0.0936416	0.925394	1
824	MSTRG.10636	26.0955	0.569831	0.622747	0.915029	0.360176	1
825	MSTRG.10638	33.2258	-0.0497747	0.54873	-0.0907089	0.927724	1
826	MSTRG.10639	10.1408	-0.444983	1.00604	-0.442311	0.658264	1
827	MSTRG.1064	30.5048	0.537302	0.587151	0.915099	0.36014	1
828	MSTRG.10640	19.8146	0.0154427	0.755928	0.0204289	0.983701	1
829	MSTRG.10645	467.591	-0.0347691	0.16143	-0.215382	0.829469	1
830	MSTRG.1065	32.8822	0.221197	0.5316	0.416097	0.677339	1
831	MSTRG.10650	11.9707	-1.73475	0.915662	-1.89453	0.0581543	1
832	MSTRG.10652	122.022	0.19013	0.301016	0.631626	0.527631	1
833	MSTRG.10653	20.3812	0.0972476	0.702514	0.138428	0.889902	1
834	MSTRG.10655	12.3295	-0.166776	0.982854	-0.169686	0.865257	1
835	MSTRG.10657	2899.89	0.00245996	0.0819257	0.0300268	0.976046	1
836	MSTRG.10658	336.907	-0.19085	0.179533	-1.06304	0.287766	1
837	MSTRG.10659	139.572	0.296473	0.271585	1.09164	0.274992	1
838	MSTRG.1066	63.8331	-0.00466435	0.396224	-0.011772	0.990608	1
839	MSTRG.10660	14.1662	-0.13983	0.799814	-0.174828	0.861215	1
840	MSTRG.10663	108.62	-0.213519	0.290477	-0.735064	0.462301	1
841	MSTRG.10664	88.3363	0.590406	0.339884	1.73708	0.0823729	1
842	MSTRG.10665	631.194	0.089296	0.141791	0.629773	0.528843	1
843	MSTRG.10667	42.7353	0.262693	0.500919	0.524423	0.599984	1
844	MSTRG.10668	3011.01	-0.132134	0.0868775	-1.52092	0.12828	1
845	MSTRG.10669	1261.72	0.00918256	0.106039	0.0865962	0.930993	1
846	MSTRG.1067	29.5968	-0.0112249	0.609384	-0.01842	0.985304	1
847	MSTRG.10670	131.395	-0.185953	0.274772	-0.676753	0.498562	1
848	MSTRG.10671	540.44	0.0822252	0.152513	0.539136	0.589793	1
849	MSTRG.10672	1761.9	-0.102931	0.0992957	-1.03661	0.299916	1
850	MSTRG.10673	482.92	0.0602757	0.150633	0.40015	0.689046	1
851	MSTRG.10674	1469.94	0.0650216	0.101332	0.641668	0.521089	1
852	MSTRG.10675	32.0346	0.743055	0.53491	1.38912	0.164796	1
853	MSTRG.10676	2554.5	-0.0729447	0.0905401	-0.805662	0.420438	1
854	MSTRG.10677	612.428	-0.0508586	0.177409	-0.286675	0.774361	1
855	MSTRG.10678	471.888	-0.00995204	0.151972	-0.0654859	0.947787	1
856	MSTRG.1068	174.713	-0.174429	0.245861	-0.709461	0.478038	1
857	MSTRG.10681	1590.8	0.020624	0.106469	0.193709	0.846403	1
858	MSTRG.10682	330.535	-0.072292	0.175936	-0.4109	0.681146	1
859	MSTRG.10683	384.837	-0.29212	0.190739	-1.53152	0.125642	1
860	MSTRG.10684	98.2345	-0.174359	0.327611	-0.532214	0.594578	1
861	MSTRG.10685	9489.23	-0.04834	0.0804838	-0.600618	0.548094	1
862	MSTRG.10686	93.133	0.811311	0.462796	1.75306	0.0795909	1
863	MSTRG.10688	53.2128	-0.0395483	0.45978	-0.0860157	0.931454	1
864	MSTRG.10689	36.0489	-0.527831	0.609014	-0.866697	0.386108	1
865	MSTRG.1069	11.952	-0.329253	0.921552	-0.357281	0.720882	1
866	MSTRG.10690	12.0778	0.656642	0.87037	0.75444	0.450585	1
867	MSTRG.10691	37.8379	-0.188775	0.532937	-0.354217	0.723176	1
868	MSTRG.10692	503.504	0.00615924	0.16355	0.0376597	0.969959	1
869	MSTRG.10693	3247.03	0.102815	0.0961835	1.06895	0.285093	1
870	MSTRG.10694	585.575	-0.131695	0.164207	-0.802005	0.42255	1
871	MSTRG.10695	5218.04	0.0520151	0.0878344	0.592195	0.55372	1
872	MSTRG.10696	1133.27	0.0793631	0.113326	0.700306	0.483736	1
873	MSTRG.10697	3794.92	0.117544	0.0834581	1.40842	0.159006	1
874	MSTRG.10698	1466.78	-0.0117239	0.139905	-0.0837985	0.933217	1
875	MSTRG.107	377.094	-0.0778135	0.176482	-0.440914	0.659275	1
876	MSTRG.1070	498.729	0.0115727	0.155262	0.0745365	0.940584	1
877	MSTRG.10701	950.334	0.0631502	0.114834	0.549925	0.582371	1
878	MSTRG.10702	11.2993	0.176853	1.01988	0.173405	0.862333	1
879	MSTRG.10703	1981.98	0.14341	0.0999915	1.43422	0.151509	1
880	MSTRG.10706	457.219	-0.115306	0.199696	-0.577407	0.563664	1
881	MSTRG.10707	49.1805	0.105927	0.429223	0.246787	0.805073	1
882	MSTRG.1071	3446.76	-0.163679	0.0988819	-1.6553	0.0978646	1
883	MSTRG.10711	445.523	0.06565	0.153452	0.42782	0.668782	1
884	MSTRG.10712	1036.86	-0.107227	0.113605	-0.943863	0.34524	1
885	MSTRG.10713	2780.7	0.070263	0.0928259	0.756934	0.44909	1
886	MSTRG.10714	884.567	0.136674	0.130037	1.05104	0.293242	1
887	MSTRG.10715	2907.15	-0.0142794	0.103724	-0.137667	0.890504	1
888	MSTRG.10716	2781.79	-0.13286	0.0901147	-1.47434	0.140389	1
889	MSTRG.10717	74.9363	-0.454235	0.357348	-1.27113	0.203683	1
890	MSTRG.10718	1171.85	0.0123651	0.114833	0.107679	0.91425	1
891	MSTRG.10719	4275.53	0.0906366	0.0948777	0.955299	0.339426	1
892	MSTRG.1072	7.97948	-0.190512	1.11247	-0.17125	0.864027	1
893	MSTRG.10720	163.946	0.20317	0.243098	0.835753	0.403294	1
894	MSTRG.10721	2401.2	-0.0760054	0.0976518	-0.778331	0.436374	1
895	MSTRG.10722	13.132	-0.906612	0.886619	-1.02255	0.306521	1
896	MSTRG.10723	161.993	0.0173638	0.255762	0.0678904	0.945873	1
897	MSTRG.10724	38.3678	-0.211591	0.508515	-0.416095	0.67734	1
898	MSTRG.10725	5824.16	-0.00174239	0.10688	-0.0163022	0.986993	1
899	MSTRG.10726	91.3344	0.203189	0.327147	0.621095	0.534537	1
900	MSTRG.10727	55.9852	-0.339771	0.439623	-0.772869	0.4396	1
901	MSTRG.10728	65.0783	-0.0596959	0.388864	-0.153513	0.877993	1
902	MSTRG.10729	10.8107	0.346609	0.911838	0.380121	0.703855	1
903	MSTRG.10730	21.0873	0.132617	0.665194	0.199366	0.841976	1
904	MSTRG.10731	18.8138	-0.513178	0.697826	-0.735395	0.462099	1
905	MSTRG.10732	26.026	0.199561	0.582671	0.342494	0.731979	1
906	MSTRG.10736	336.596	0.0154382	0.182232	0.0847172	0.932486	1
907	MSTRG.10737	71.7506	0.272147	0.405659	0.670874	0.502301	1
908	MSTRG.10738	12.9735	-0.173108	0.866821	-0.199704	0.841712	1
909	MSTRG.10739	53.3143	0.0189709	0.442682	0.0428544	0.965818	1
910	MSTRG.1074	969.875	0.0146961	0.125991	0.116644	0.907142	1
911	MSTRG.10740	135.359	0.239765	0.292913	0.818556	0.41304	1
912	MSTRG.10742	260.301	-0.0412729	0.198107	-0.208336	0.834966	1
913	MSTRG.10743	382.702	-0.188115	0.168524	-1.11625	0.264314	1
914	MSTRG.10744	106.127	-0.0520979	0.311197	-0.167411	0.867047	1
915	MSTRG.10748	8.6476	0.275825	1.04698	0.26345	0.792204	1
916	MSTRG.10751	8.45391	0.293356	1.05448	0.278199	0.780859	1
917	MSTRG.10752	71.2418	0.204884	0.406636	0.503851	0.614366	1
918	MSTRG.10755	1233.75	-0.0655974	0.105229	-0.623375	0.533038	1
919	MSTRG.10757	1219.47	-0.0202072	0.10871	-0.185882	0.852538	1
920	MSTRG.10759	16.254	0.447479	0.766803	0.583565	0.559513	1
921	MSTRG.10760	1151.45	0.101583	0.108657	0.934891	0.349844	1
922	MSTRG.10761	995.646	-0.0101301	0.115007	-0.0880827	0.929811	1
923	MSTRG.10762	388.095	-0.0914538	0.182587	-0.500878	0.616457	1
924	MSTRG.10764	5870.69	-0.0601273	0.0751859	-0.799715	0.423876	1
925	MSTRG.10765	470.476	-0.054375	0.165316	-0.328915	0.74222	1
926	MSTRG.10766	158.824	0.136419	0.259906	0.524877	0.599669	1
927	MSTRG.10768	697.463	-0.0102759	0.128036	-0.0802582	0.936032	1
928	MSTRG.1077	41.0495	0.0216166	0.483234	0.0447332	0.96432	1
929	MSTRG.10770	140.147	0.00722946	0.27702	0.0260972	0.97918	1
930	MSTRG.10771	584.548	0.00495476	0.139658	0.0354779	0.971699	1
931	MSTRG.10773	17.1576	-0.0502608	0.772628	-0.0650517	0.948133	1
932	MSTRG.10774	24.8385	-0.292009	0.601126	-0.485771	0.62713	1
933	MSTRG.10776	10.1465	0.127676	0.969006	0.13176	0.895174	1
934	MSTRG.10777	2794.15	-0.031332	0.0971707	-0.322443	0.747117	1
935	MSTRG.10778	3253	-0.0588895	0.116501	-0.505485	0.613219	1
936	MSTRG.10779	88.3725	0.319641	0.350598	0.911702	0.361926	1
937	MSTRG.1078	91.4422	-0.143934	0.321946	-0.447074	0.654822	1
938	MSTRG.10781	4000.66	-0.0939279	0.0871649	-1.07759	0.281217	1
939	MSTRG.10782	89.8375	-0.35356	0.326798	-1.08189	0.2793	1
940	MSTRG.10784	370.413	-0.0874943	0.174566	-0.501209	0.616224	1
941	MSTRG.10785	578.778	-0.0532909	0.140106	-0.380361	0.703677	1
942	MSTRG.10786	662.464	-0.0432947	0.138569	-0.312443	0.754704	1
943	MSTRG.10787	2848.22	-0.113757	0.126766	-0.897377	0.369518	1
944	MSTRG.10788	394.256	0.148132	0.160189	0.924735	0.355104	1
945	MSTRG.10789	8.39004	-0.720322	1.11957	-0.643389	0.519972	1
946	MSTRG.1079	1065.31	-0.202363	0.114147	-1.77283	0.0762576	1
947	MSTRG.10790	814.151	-0.00638684	0.128919	-0.0495414	0.960488	1
948	MSTRG.10791	2618.94	0.0232779	0.0941989	0.247115	0.80482	1
949	MSTRG.10792	1667.38	-0.028205	0.0982856	-0.28697	0.774136	1
950	MSTRG.10793	47.8366	-0.0146551	0.444408	-0.0329767	0.973693	1
951	MSTRG.10794	1694.86	-0.123274	0.0969438	-1.27161	0.203513	1
952	MSTRG.10796	772.014	-0.0837469	0.124424	-0.673076	0.500899	1
953	MSTRG.10797	582.277	-0.0172699	0.141046	-0.122441	0.90255	1
954	MSTRG.10798	16.6142	-0.502231	0.745663	-0.673536	0.500606	1
955	MSTRG.108	16.9974	-0.248938	0.753311	-0.330458	0.741054	1
956	MSTRG.1080	9.09111	-0.0285521	1.0076	-0.0283368	0.977394	1
957	MSTRG.10802	511.688	0.0230819	0.204858	0.112673	0.91029	1
958	MSTRG.10803	524.926	0.0221327	0.15494	0.142847	0.886411	1
959	MSTRG.10805	21.9865	-0.407357	0.677623	-0.601156	0.547736	1
960	MSTRG.10806	253.307	-0.12198	0.248409	-0.491045	0.623395	1
961	MSTRG.10807	109.037	0.104472	0.304998	0.342532	0.731951	1
962	MSTRG.10808	25.0766	0.885453	0.690104	1.28307	0.199467	1
963	MSTRG.10809	3148.63	-0.151814	0.0861591	-1.76202	0.0780664	1
964	MSTRG.1081	53.4919	-0.0485308	0.435142	-0.111529	0.911197	1
965	MSTRG.10810	4359.33	-0.0733221	0.0934846	-0.784323	0.432851	1
966	MSTRG.10811	859.388	-0.129298	0.120007	-1.07742	0.281291	1
967	MSTRG.10812	1836.81	0.018315	0.0940274	0.194783	0.845562	1
968	MSTRG.10813	907.004	-0.089763	0.117337	-0.765004	0.444269	1
969	MSTRG.10815	14.6011	0.125373	0.845554	0.148273	0.882127	1
970	MSTRG.10816	942.484	-0.0191301	0.119981	-0.159443	0.87332	1
971	MSTRG.10817	219.141	-0.0164607	0.223132	-0.073771	0.941193	1
972	MSTRG.10818	623.052	0.120697	0.141794	0.851213	0.394651	1
973	MSTRG.10819	8.92383	0.452448	1.01477	0.445863	0.655696	1
974	MSTRG.1082	115.689	0.130301	0.284386	0.458183	0.646821	1
975	MSTRG.10820	8.64078	-0.178509	1.06126	-0.168205	0.866422	1
976	MSTRG.10821	18.9658	-0.524768	0.738619	-0.710472	0.477412	1
977	MSTRG.10822	26.0145	0.883729	0.680349	1.29893	0.193966	1
978	MSTRG.10823	39.1171	0.267789	0.480728	0.557048	0.577494	1
979	MSTRG.10825	12.894	-0.154188	0.805601	-0.191395	0.848216	1
980	MSTRG.10826	249.666	0.117075	0.221292	0.529053	0.596769	1
981	MSTRG.10827	7445.56	0.0508473	0.0687256	0.739859	0.459385	1
982	MSTRG.10828	1494.37	-0.0360662	0.108021	-0.333881	0.738469	1
983	MSTRG.1083	716.342	0.0505086	0.13225	0.381917	0.702523	1
984	MSTRG.10831	9.82045	-0.0390713	0.993018	-0.039346	0.968614	1
985	MSTRG.10832	220.416	-0.097906	0.212132	-0.461534	0.644416	1
986	MSTRG.10833	455.228	0.0138894	0.165576	0.0838856	0.933147	1
987	MSTRG.10834	166.942	-0.0263453	0.246245	-0.106988	0.914799	1
988	MSTRG.10836	108.244	-0.160282	0.303548	-0.52803	0.597478	1
989	MSTRG.10837	1901.51	-0.0793391	0.0928546	-0.854444	0.392859	1
990	MSTRG.10838	919.9	-0.0735837	0.116316	-0.632617	0.526984	1
991	MSTRG.10839	932.238	0.04479	0.150484	0.29764	0.765978	1
992	MSTRG.1084	4303.09	-0.0556315	0.0757022	-0.734873	0.462417	1
993	MSTRG.10840	129.445	0.0478846	0.278966	0.17165	0.863713	1
994	MSTRG.10841	880.167	0.0805169	0.146951	0.547917	0.583749	1
995	MSTRG.10842	27.6637	0.39779	0.657997	0.604546	0.545481	1
996	MSTRG.10843	10.8796	0.168964	0.918804	0.183896	0.854095	1
997	MSTRG.10844	480.409	-0.0104919	0.194062	-0.0540649	0.956883	1
998	MSTRG.10846	2569.73	-0.189694	0.139237	-1.36239	0.173075	1
999	MSTRG.10847	940.288	-0.175022	0.129724	-1.34919	0.177276	1
1000	MSTRG.10848	823.993	0.0335395	0.171935	0.19507	0.845338	1
1001	MSTRG.10849	35.2765	-0.383402	0.505066	-0.759113	0.447785	1
1002	MSTRG.1085	395.585	0.13136	0.174672	0.752037	0.452029	1
1003	MSTRG.10850	1831.19	-0.102784	0.0958331	-1.07253	0.283483	1
1004	MSTRG.10852	38.3532	-0.142952	0.532156	-0.268629	0.788215	1
1005	MSTRG.10853	902.525	-0.0109057	0.118709	-0.0918696	0.926802	1
1006	MSTRG.10854	1328.27	-0.267988	0.110006	-2.43612	0.0148458	1
1007	MSTRG.10855	22.2037	-0.654978	0.65508	-0.999844	0.317386	1
1008	MSTRG.10856	572.685	0.198676	0.179694	1.10563	0.268885	1
1009	MSTRG.10857	275.209	-0.132576	0.195944	-0.6766	0.49866	1
1010	MSTRG.10858	593.488	0.0150033	0.140828	0.106536	0.915157	1
1011	MSTRG.1086	44.6892	0.307217	0.441476	0.695885	0.486501	1
1012	MSTRG.10860	16.9698	0.455468	0.754333	0.603803	0.545975	1
1013	MSTRG.10861	204.599	-0.315222	0.236146	-1.33486	0.181922	1
1014	MSTRG.10862	6518.4	-0.0178618	0.0747415	-0.238981	0.811121	1
1015	MSTRG.10863	678.122	0.0118238	0.134037	0.0882135	0.929707	1
1016	MSTRG.10865	144.554	0.0454945	0.269165	0.169021	0.86578	1
1017	MSTRG.10866	104.07	0.227614	0.32282	0.705079	0.480761	1
1018	MSTRG.10867	1611.27	-0.10163	0.0977184	-1.04003	0.298324	1
1019	MSTRG.10869	1829.15	-0.0794626	0.100929	-0.78731	0.4311	1
1020	MSTRG.1087	3952.33	-0.066111	0.0785031	-0.842145	0.399707	1
1021	MSTRG.10871	502.946	0.0223645	0.149377	0.149718	0.880987	1
1022	MSTRG.10872	970.895	-0.12695	0.113763	-1.11592	0.264457	1
1023	MSTRG.10873	1175.35	0.096503	0.129257	0.746598	0.455306	1
1024	MSTRG.10874	418.62	-0.00504604	0.16622	-0.0303577	0.975782	1
1025	MSTRG.10875	10.0925	0.519038	0.925696	0.5607	0.575002	1
1026	MSTRG.10877	6012.56	-0.123522	0.0818877	-1.50843	0.131443	1
1027	MSTRG.10878	81.6634	0.204522	0.353219	0.579023	0.562573	1
1028	MSTRG.10879	1143.65	0.10065	0.108476	0.927852	0.353484	1
1029	MSTRG.1088	4364.7	-0.0807965	0.0812815	-0.994032	0.320207	1
1030	MSTRG.10880	16471.1	-0.066906	0.0732993	-0.912778	0.361359	1
1031	MSTRG.10884	1008.56	-0.0215693	0.121784	-0.177111	0.859421	1
1032	MSTRG.10887	1258.82	-0.142048	0.10509	-1.35169	0.176475	1
1033	MSTRG.10888	106.642	-0.487997	0.301335	-1.61945	0.105351	1
1034	MSTRG.10890	8.52973	0.083509	1.01979	0.0818883	0.934736	1
1035	MSTRG.10891	38.4315	-0.254862	0.502956	-0.506728	0.612346	1
1036	MSTRG.10892	439.478	0.10394	0.1643	0.632624	0.526979	1
1037	MSTRG.10893	127.253	-0.105611	0.332778	-0.317362	0.750969	1
1038	MSTRG.10894	199.819	-0.0960585	0.280454	-0.342511	0.731967	1
1039	MSTRG.10895	131.698	-0.125711	0.290648	-0.43252	0.665364	1
1040	MSTRG.10897	41.0101	-0.729023	0.500241	-1.45734	0.145022	1
1041	MSTRG.10898	2734.25	-0.149685	0.0938122	-1.59559	0.110581	1
1042	MSTRG.10899	85.6377	-0.069739	0.349834	-0.199349	0.84199	1
1043	MSTRG.1090	17.2034	-0.154083	0.734035	-0.209913	0.833736	1
1044	MSTRG.10900	494.004	-0.0417602	0.158436	-0.263578	0.792105	1
1045	MSTRG.10901	895.325	0.029934	0.118366	0.252893	0.800351	1
1046	MSTRG.10902	532.323	0.0395036	0.147869	0.267153	0.789351	1
1047	MSTRG.10903	348.812	-0.105437	0.171412	-0.615106	0.538485	1
1048	MSTRG.10904	985.08	0.0981246	0.115092	0.852579	0.393893	1
1049	MSTRG.10906	42.9542	0.322014	0.515806	0.624292	0.532436	1
1050	MSTRG.10907	22.1459	-0.717764	0.6627	-1.08309	0.278768	1
1051	MSTRG.10908	40703.2	-0.0855905	0.0740884	-1.15525	0.247989	1
1052	MSTRG.1091	84.5675	-0.236179	0.366978	-0.643578	0.519849	1
1053	MSTRG.10910	960.627	-0.0724852	0.122094	-0.593683	0.552724	1
1054	MSTRG.10911	588.132	0.0823663	0.138793	0.593446	0.552883	1
1055	MSTRG.10913	11257.5	0.0441454	0.0668305	0.660557	0.508896	1
1056	MSTRG.10915	510.69	-0.0572661	0.164973	-0.347125	0.728497	1
1057	MSTRG.10916	22.7875	0.187852	0.626164	0.300004	0.764174	1
1058	MSTRG.10918	1615.48	0.0556209	0.110161	0.504907	0.613624	1
1059	MSTRG.10919	601.636	0.00615702	0.142852	0.0431008	0.965621	1
1060	MSTRG.1092	5122.77	-0.0298942	0.0941809	-0.317413	0.750931	1
1061	MSTRG.10920	39.4672	0.473055	0.511795	0.924304	0.355328	1
1062	MSTRG.10922	815.219	-0.114352	0.12235	-0.934624	0.349982	1
1063	MSTRG.10924	141.997	0.126628	0.260468	0.486155	0.626857	1
1064	MSTRG.10925	1229.8	0.261859	0.431196	0.607284	0.543662	1
1065	MSTRG.10926	2899.03	-0.0311916	0.0808933	-0.385589	0.699801	1
1066	MSTRG.10927	33.2158	-0.118146	0.529247	-0.223233	0.823354	1
1067	MSTRG.10928	66.7546	0.0650225	0.384968	0.168904	0.865872	1
1068	MSTRG.10929	185.54	-0.155813	0.233933	-0.666058	0.505374	1
1069	MSTRG.1093	31.825	0.229085	0.555131	0.412669	0.679849	1
1070	MSTRG.10930	207.062	-0.183836	0.242712	-0.757425	0.448795	1
1071	MSTRG.10931	15.1867	-0.269475	0.824897	-0.326677	0.743912	1
1072	MSTRG.10932	8.12027	0.532006	1.14167	0.465989	0.641224	1
1073	MSTRG.10934	24.9736	0.40314	0.618616	0.65168	0.514608	1
1074	MSTRG.10935	147.994	0.380925	0.269309	1.41445	0.157229	1
1075	MSTRG.10936	178.863	-0.171026	0.252689	-0.676825	0.498517	1
1076	MSTRG.10937	10.5218	-1.7212e-05	0.94499	-1.82139e-05	0.999985	1
1077	MSTRG.10938	762.96	0.0322663	0.126265	0.255544	0.798303	1
1078	MSTRG.10939	1663.57	0.0617728	0.0988321	0.625027	0.531953	1
1079	MSTRG.10940	10011.6	-0.0630462	0.0825937	-0.763329	0.445267	1
1080	MSTRG.10941	1296.73	0.159741	0.125659	1.27123	0.203649	1
1081	MSTRG.10942	2141.12	-0.0190264	0.091572	-0.207775	0.835405	1
1082	MSTRG.10943	11.0839	0.10244	0.885352	0.115706	0.907886	1
1083	MSTRG.10944	5161.63	-0.115369	0.0740173	-1.55867	0.119075	1
1084	MSTRG.10945	10453.5	-0.047844	0.0706514	-0.677184	0.498289	1
1085	MSTRG.10946	1144.45	0.0711719	0.112793	0.630994	0.528044	1
1086	MSTRG.10947	66.0194	0.559803	0.398694	1.40409	0.160292	1
1087	MSTRG.10948	35.8729	-0.234478	0.552512	-0.424386	0.671285	1
1088	MSTRG.10949	14.0455	-0.625057	0.818803	-0.763379	0.445237	1
1089	MSTRG.10950	51.2231	-0.213378	0.445164	-0.479325	0.631708	1
1090	MSTRG.10952	1872.82	0.0447062	0.150012	0.298018	0.76569	1
1091	MSTRG.10954	255.816	-0.141489	0.223337	-0.633524	0.526391	1
1092	MSTRG.10955	1443.16	-0.0458523	0.099923	-0.458876	0.646323	1
1093	MSTRG.10956	193.298	0.228483	0.23027	0.992241	0.32108	1
1094	MSTRG.10957	11.2817	-0.266629	0.867575	-0.307327	0.758594	1
1095	MSTRG.10958	339.482	-0.0408868	0.190568	-0.214552	0.830116	1
1096	MSTRG.10959	1552.57	-0.122304	0.0989708	-1.23576	0.216548	1
1097	MSTRG.10961	297.662	-0.0714473	0.182842	-0.39076	0.695975	1
1098	MSTRG.10962	1317.02	-0.122217	0.10599	-1.15309	0.248874	1
1099	MSTRG.10963	507.936	-0.215847	0.190195	-1.13487	0.256429	1
1100	MSTRG.10964	7.07573	0.17035	1.10596	0.154029	0.877587	1
1101	MSTRG.10965	1936.96	-0.0370292	0.100071	-0.370028	0.711362	1
1102	MSTRG.10966	222.118	0.112879	0.218602	0.516366	0.605599	1
1103	MSTRG.10967	2120.81	-0.140811	0.0996692	-1.41278	0.157719	1
1104	MSTRG.10968	13.5191	0.0372214	0.981918	0.0379068	0.969762	1
1105	MSTRG.10969	3011.41	0.0249879	0.085381	0.292664	0.769779	1
1106	MSTRG.10970	1260.88	0.00580314	0.107743	0.0538609	0.957046	1
1107	MSTRG.10971	648.46	0.0367062	0.135953	0.269992	0.787167	1
1108	MSTRG.10972	4000.76	-0.0946862	0.0846702	-1.11829	0.263441	1
1109	MSTRG.10973	5021.14	-0.286983	0.563852	-0.508969	0.610774	1
1110	MSTRG.10974	40.4281	-0.0349455	0.501793	-0.0696413	0.944479	1
1111	MSTRG.10975	225.927	-0.0438556	0.216587	-0.202485	0.839538	1
1112	MSTRG.10976	2180.45	0.0991267	0.101806	0.973683	0.330214	1
1113	MSTRG.10979	561.089	0.037957	0.146445	0.25919	0.795488	1
1114	MSTRG.1098	17.5584	-0.505971	0.795943	-0.635688	0.52498	1
1115	MSTRG.10980	1520.22	-0.0708375	0.100149	-0.707321	0.479367	1
1116	MSTRG.10981	283.582	-0.0983029	0.207464	-0.47383	0.635621	1
1117	MSTRG.10982	8.13882	0.176702	1.12556	0.156991	0.875252	1
1118	MSTRG.10983	53.3886	-0.330214	0.43178	-0.764772	0.444407	1
1119	MSTRG.10985	56.5107	0.225327	0.400728	0.562293	0.573916	1
1120	MSTRG.10986	8.05652	0.699811	1.26258	0.554271	0.579394	1
1121	MSTRG.10987	8.11927	0.528896	1.03719	0.50993	0.6101	1
1122	MSTRG.10988	5858.03	-0.054675	0.0846124	-0.646182	0.518161	1
1123	MSTRG.10989	9.41292	1.03071	0.998877	1.03186	0.302136	1
1124	MSTRG.1099	587.344	0.124128	0.145613	0.852449	0.393965	1
1125	MSTRG.10992	4048.27	-0.12726	0.081201	-1.56722	0.117063	1
1126	MSTRG.10993	1005.84	-0.136193	0.120406	-1.13111	0.258009	1
1127	MSTRG.10994	645.805	0.186405	0.136906	1.36156	0.173337	1
1128	MSTRG.10995	1253.6	-0.100529	0.105778	-0.950384	0.341917	1
1129	MSTRG.10996	646.118	-0.0555167	0.133904	-0.414601	0.678434	1
1130	MSTRG.10998	802.408	-0.0173189	0.122368	-0.141531	0.88745	1
1131	MSTRG.10999	666.879	-0.0606415	0.131591	-0.460832	0.644919	1
1132	MSTRG.11	135.891	0.151737	0.286807	0.529056	0.596766	1
1133	MSTRG.110	36.5559	-0.121175	0.51242	-0.236476	0.813063	1
1134	MSTRG.1100	151.599	0.150326	0.254005	0.591821	0.55397	1
1135	MSTRG.11001	65.0563	0.148895	0.398389	0.373742	0.708596	1
1136	MSTRG.11003	59.1124	-0.248313	0.402779	-0.6165	0.537565	1
1137	MSTRG.11004	187.041	-0.063639	0.243653	-0.261187	0.793948	1
1138	MSTRG.11005	72.1592	0.108475	0.370025	0.293157	0.769402	1
1139	MSTRG.11006	116.223	-0.355989	0.294988	-1.20679	0.227512	1
1140	MSTRG.11007	32.168	-0.0422789	0.582774	-0.0725476	0.942166	1
1141	MSTRG.11008	117.376	-0.0812402	0.297645	-0.272943	0.784897	1
1142	MSTRG.1101	224.663	0.162315	0.223528	0.726153	0.467745	1
1143	MSTRG.11010	208.09	-0.144717	0.257574	-0.561845	0.574221	1
1144	MSTRG.11011	431.701	-0.209528	0.17395	-1.20453	0.228385	1
1145	MSTRG.11012	1759.58	-0.297148	0.124672	-2.38344	0.0171517	1
1146	MSTRG.11014	327.091	-0.0961944	0.191131	-0.503291	0.61476	1
1147	MSTRG.11015	2112.33	-0.0345087	0.0913832	-0.377626	0.705709	1
1148	MSTRG.11016	709.202	-0.178166	0.126847	-1.40457	0.160149	1
1149	MSTRG.11017	849.094	-0.0149938	0.127414	-0.117678	0.906323	1
1150	MSTRG.11018	292.322	-0.146533	0.193197	-0.758462	0.448174	1
1151	MSTRG.11019	554.95	0.0241574	0.159076	0.151861	0.879297	1
1152	MSTRG.1102	1022.4	-0.0580505	0.113557	-0.511201	0.609211	1
1153	MSTRG.11021	765.807	0.0199167	0.129537	0.153753	0.877805	1
1154	MSTRG.11022	159.234	-0.131316	0.281441	-0.466583	0.640798	1
1155	MSTRG.11023	459.642	-0.0708915	0.152604	-0.464546	0.642257	1
1156	MSTRG.11024	184.597	0.022153	0.231646	0.0956333	0.923812	1
1157	MSTRG.11025	12.318	0.756902	0.889448	0.850979	0.394781	1
1158	MSTRG.11026	1823.28	-0.022333	0.101886	-0.219196	0.826498	1
1159	MSTRG.11027	674.437	-0.0720827	0.151347	-0.476275	0.633879	1
1160	MSTRG.11028	93.3454	0.241221	0.319097	0.755949	0.44968	1
1161	MSTRG.11029	36.6765	0.0322385	0.533644	0.0604121	0.951827	1
1162	MSTRG.1103	1060.03	-0.000248676	0.115648	-0.00215028	0.998284	1
1163	MSTRG.11030	1053.87	-0.0196183	0.109896	-0.178516	0.858318	1
1164	MSTRG.11031	12.8639	-0.478817	0.853851	-0.560774	0.574952	1
1165	MSTRG.11032	20.8032	0.28424	0.66877	0.425019	0.670823	1
1166	MSTRG.11033	162.216	0.203667	0.254898	0.799014	0.424282	1
1167	MSTRG.11035	18.4611	0.153155	0.71544	0.21407	0.830492	1
1168	MSTRG.11036	112.892	0.047865	0.315019	0.151943	0.879232	1
1169	MSTRG.11037	12.7521	0.616162	0.86201	0.714796	0.474735	1
1170	MSTRG.11038	450.052	0.0687111	0.168909	0.406793	0.68416	1
1171	MSTRG.11040	860.97	-0.230573	0.152938	-1.50762	0.131652	1
1172	MSTRG.11041	267.109	-0.0625234	0.20834	-0.300104	0.764098	1
1173	MSTRG.11042	871.266	-0.026901	0.125095	-0.215045	0.829732	1
1174	MSTRG.11043	294.462	0.0178409	0.191091	0.0933632	0.925615	1
1175	MSTRG.11045	1062.57	-0.0850436	0.135808	-0.626206	0.53118	1
1176	MSTRG.11046	842.441	0.0125916	0.143659	0.0876493	0.930155	1
1177	MSTRG.11047	795.422	0.223396	0.125664	1.77773	0.0754481	1
1178	MSTRG.11048	241.591	0.197658	0.226041	0.874434	0.381882	1
1179	MSTRG.11049	86.3235	-0.203735	0.328798	-0.619637	0.535497	1
1180	MSTRG.1105	390.112	0.0180921	0.183763	0.0984535	0.921572	1
1181	MSTRG.11052	1367.75	-0.157561	0.131694	-1.19641	0.231535	1
1182	MSTRG.11053	6844.43	0.123389	0.0762551	1.6181	0.105641	1
1183	MSTRG.11054	347.053	0.111759	0.183592	0.608732	0.542702	1
1184	MSTRG.11055	424.629	-0.0235485	0.16357	-0.143966	0.885528	1
1185	MSTRG.11056	74.2357	0.50352	0.366877	1.37245	0.169924	1
1186	MSTRG.11057	732.7	0.0546365	0.131536	0.415373	0.677869	1
1187	MSTRG.11058	110.206	0.0080225	0.308465	0.0260078	0.979251	1
1188	MSTRG.11059	282.735	0.3002	0.204356	1.469	0.141832	1
1189	MSTRG.11060	233.273	0.133867	0.212755	0.629208	0.529213	1
1190	MSTRG.11061	963.148	-0.0477538	0.11425	-0.417977	0.675964	1
1191	MSTRG.11062	1091.77	-0.127546	0.115371	-1.10553	0.268931	1
1192	MSTRG.11063	534.279	-0.0826876	0.154738	-0.534373	0.593083	1
1193	MSTRG.11064	1224.14	-0.128344	0.115247	-1.11364	0.265436	1
1194	MSTRG.11065	9.79672	-0.859364	1.01833	-0.843896	0.398727	1
1195	MSTRG.11066	20.0556	0.381809	0.678988	0.56232	0.573898	1
1196	MSTRG.11067	10682.2	-0.0780975	0.0654361	-1.19349	0.232676	1
1197	MSTRG.11069	497.408	0.0195138	0.150131	0.129978	0.896584	1
1198	MSTRG.1107	512.066	-0.192761	0.146775	-1.31331	0.189079	1
1199	MSTRG.11070	253.668	-0.122997	0.19979	-0.61563	0.538139	1
1200	MSTRG.11073	1120.94	0.074675	0.112639	0.662959	0.507357	1
1201	MSTRG.11075	122.817	0.312488	0.279371	1.11854	0.263336	1
1202	MSTRG.11077	268.549	0.0129852	0.197604	0.0657134	0.947606	1
1203	MSTRG.11078	259.457	-0.0616719	0.20288	-0.303983	0.761141	1
1204	MSTRG.11079	13.9879	0.500282	1.21127	0.413024	0.679589	1
1205	MSTRG.1108	649.499	-0.0308576	0.161699	-0.190834	0.848655	1
1206	MSTRG.11080	31.4409	0.191758	0.563054	0.340568	0.733429	1
1207	MSTRG.11081	140.878	0.209906	0.28117	0.746545	0.455338	1
1208	MSTRG.11082	13102.3	-0.211674	0.578225	-0.366075	0.714309	1
1209	MSTRG.11083	10085.1	-0.304787	0.634727	-0.480186	0.631095	1
1210	MSTRG.11084	909.573	-0.517146	0.716476	-0.721791	0.470423	1
1211	MSTRG.11086	31.6295	0.202771	0.568852	0.356457	0.721498	1
1212	MSTRG.11087	744.635	-0.0285434	0.683803	-0.0417421	0.966704	1
1213	MSTRG.11089	2098.46	-0.733176	0.675315	-1.08568	0.277621	1
1214	MSTRG.1109	388.413	0.00180339	0.180334	0.0100003	0.992021	1
1215	MSTRG.11090	386.806	-0.661303	0.693785	-0.953181	0.340498	1
1216	MSTRG.11091	189.687	-0.0963274	0.228866	-0.42089	0.673835	1
1217	MSTRG.11092	75.9563	-0.377236	0.472599	-0.798215	0.424746	1
1218	MSTRG.11093	13847.6	-0.101941	0.105766	-0.963839	0.335127	1
1219	MSTRG.11094	8439.78	-0.160903	0.0740811	-2.17199	0.0298563	1
1220	MSTRG.11095	67.7122	-0.35943	0.386396	-0.930211	0.352262	1
1221	MSTRG.11096	1611.23	-0.0891866	0.103049	-0.865475	0.386778	1
1222	MSTRG.11099	199.839	0.0440194	0.223039	0.197362	0.843544	1
1223	MSTRG.111	15.678	0.209998	0.835761	0.251266	0.801609	1
1224	MSTRG.1110	2956.08	0.163731	0.0889562	1.84058	0.0656833	1
1225	MSTRG.11100	1326.46	-0.0298171	0.105433	-0.282807	0.777324	1
1226	MSTRG.11101	1741.71	0.035674	0.101101	0.352857	0.724196	1
1227	MSTRG.11104	467.082	0.0680193	0.170004	0.400103	0.689081	1
1228	MSTRG.11105	42.1788	-0.058377	0.494061	-0.118157	0.905943	1
1229	MSTRG.11106	14.5787	-0.0174914	0.784191	-0.022305	0.982205	1
1230	MSTRG.11107	13.6689	-0.608449	0.835835	-0.727953	0.466642	1
1231	MSTRG.11108	1872.89	0.00273503	0.10564	0.0258902	0.979345	1
1232	MSTRG.11109	35.7832	0.0665828	0.507555	0.131183	0.89563	1
1233	MSTRG.11110	993.46	-0.0605177	0.112817	-0.536423	0.591666	1
1234	MSTRG.11111	8.59976	0.0015555	1.06836	0.00145598	0.998838	1
1235	MSTRG.11112	7.39248	-0.221423	1.11569	-0.198463	0.842683	1
1236	MSTRG.11114	267.495	-0.120056	0.188761	-0.63602	0.524763	1
1237	MSTRG.11115	56.6513	0.29819	0.443281	0.672688	0.501146	1
1238	MSTRG.11116	502.854	0.398101	0.178895	2.22533	0.0260594	1
1239	MSTRG.11117	1080.5	-0.20015	0.112692	-1.77609	0.0757186	1
1240	MSTRG.11119	11.5764	0.560822	0.995301	0.56347	0.573115	1
1241	MSTRG.1112	20.4438	0.0819607	0.662299	0.123752	0.901512	1
1242	MSTRG.11120	61.3967	0.252162	0.420273	0.599996	0.548509	1
1243	MSTRG.11122	60.5842	0.0762791	0.393688	0.193755	0.846367	1
1244	MSTRG.11123	2903.98	-0.0138194	0.0845995	-0.16335	0.870242	1
1245	MSTRG.11124	396.453	-0.300872	0.162956	-1.84634	0.0648432	1
1246	MSTRG.11125	1472.35	0.0507246	0.108284	0.468441	0.639469	1
1247	MSTRG.11126	656.676	-0.0190641	0.154441	-0.123439	0.901759	1
1248	MSTRG.11128	1155.12	-0.037333	0.109757	-0.340142	0.733749	1
1249	MSTRG.11129	592.487	-0.140897	0.135157	-1.04247	0.297194	1
1250	MSTRG.11130	3796.92	-0.0395152	0.0810841	-0.487337	0.62602	1
1251	MSTRG.11132	62.2015	-0.930946	0.38866	-2.39527	0.016608	1
1252	MSTRG.11133	19.5147	0.108804	0.672884	0.161698	0.871543	1
1253	MSTRG.11134	15.5125	0.247517	0.774487	0.319589	0.74928	1
1254	MSTRG.11135	91.7538	-0.214904	0.357213	-0.601613	0.547432	1
1255	MSTRG.11136	85.8359	0.0277717	0.338534	0.0820352	0.934619	1
1256	MSTRG.11138	142.894	-0.0756137	0.273669	-0.276296	0.782321	1
1257	MSTRG.11139	59.687	0.476273	3.05605	0.155846	0.876155	1
1258	MSTRG.1114	9701.92	-0.0246367	0.0690982	-0.356546	0.721432	1
1259	MSTRG.11140	2877.65	0.0258346	0.085173	0.303319	0.761647	1
1260	MSTRG.11141	442.234	-0.0513627	0.161498	-0.31804	0.750454	1
1261	MSTRG.11142	134.242	-0.0906666	0.273993	-0.330908	0.740714	1
1262	MSTRG.11145	671.58	0.0270297	0.13785	0.19608	0.844548	1
1263	MSTRG.11147	6150.46	0.0540855	0.0713014	0.758548	0.448123	1
1264	MSTRG.11148	1750.14	-0.110858	0.120625	-0.919028	0.358081	1
1265	MSTRG.11149	4304.29	-0.173021	0.0977911	-1.76929	0.0768456	1
1266	MSTRG.1115	231.288	-0.245782	0.210879	-1.16551	0.243813	1
1267	MSTRG.11150	1470.08	-0.11498	0.109012	-1.05474	0.291543	1
1268	MSTRG.11151	3732.75	-0.138857	0.0879331	-1.57912	0.114308	1
1269	MSTRG.11152	104.023	-0.0890851	0.312494	-0.285077	0.775585	1
1270	MSTRG.11153	200.84	-0.00546467	0.223269	-0.0244757	0.980473	1
1271	MSTRG.11154	12.6749	-0.459849	0.848825	-0.541748	0.587992	1
1272	MSTRG.11155	41.4362	-0.155167	0.477519	-0.324944	0.745223	1
1273	MSTRG.11156	907.326	-0.0136997	0.11549	-0.118622	0.905575	1
1274	MSTRG.11159	116.612	0.821704	0.340205	2.41532	0.0157212	1
1275	MSTRG.1116	410.717	0.119579	0.163693	0.730509	0.465079	1
1276	MSTRG.11160	33.0986	-0.956747	0.625614	-1.52929	0.126192	1
1277	MSTRG.11161	219.091	0.329471	0.255124	1.29141	0.19656	1
1278	MSTRG.11163	1479.82	0.0361615	0.102791	0.351795	0.724992	1
1279	MSTRG.11164	367.826	-0.143118	0.171547	-0.834282	0.404122	1
1280	MSTRG.11165	770.517	-0.0301442	0.132057	-0.228267	0.819439	1
1281	MSTRG.11167	2595.58	-0.00745453	0.0859353	-0.0867459	0.930874	1
1282	MSTRG.11168	19.1607	-0.520739	0.706573	-0.736992	0.461127	1
1283	MSTRG.11169	550.688	-0.152134	0.148686	-1.02319	0.30622	1
1284	MSTRG.1117	2132.7	-0.0653205	0.123376	-0.52944	0.5965	1
1285	MSTRG.11170	36.0448	0.0046763	0.539618	0.00866595	0.993086	1
1286	MSTRG.11171	1103.56	-0.194805	0.118416	-1.64509	0.0999521	1
1287	MSTRG.11172	39.895	-0.0263059	0.506859	-0.0518998	0.958608	1
1288	MSTRG.11173	67.4046	-0.353609	0.40073	-0.882414	0.377553	1
1289	MSTRG.11174	313.175	0.0319748	0.182792	0.174925	0.861139	1
1290	MSTRG.11175	2279.48	0.00375012	0.0888101	0.0422263	0.966318	1
1291	MSTRG.11178	446.153	-0.0345404	0.156165	-0.221178	0.824954	1
1292	MSTRG.1118	542.055	-0.0943202	0.16041	-0.587995	0.556536	1
1293	MSTRG.11180	8609.22	-0.0210755	0.0735247	-0.286645	0.774384	1
1294	MSTRG.11182	62.3924	0.402139	0.443639	0.906455	0.364695	1
1295	MSTRG.11183	214.776	0.105177	0.233241	0.450936	0.652035	1
1296	MSTRG.11185	1083.07	-0.0319817	0.118557	-0.269757	0.787347	1
1297	MSTRG.11186	4688.05	0.0502102	0.0744284	0.67461	0.499923	1
1298	MSTRG.11188	1174.92	-0.0634546	0.111216	-0.570554	0.568302	1
1299	MSTRG.11189	534.194	0.00155521	0.150412	0.0103396	0.99175	1
1300	MSTRG.1119	284.975	-0.247801	0.207108	-1.19648	0.23151	1
1301	MSTRG.11190	2537.82	-0.0909187	0.0943411	-0.963723	0.335185	1
1302	MSTRG.11192	76.6201	-0.182651	0.410766	-0.444659	0.656566	1
1303	MSTRG.11193	9.16897	0.137868	1.11596	0.123542	0.901678	1
1304	MSTRG.11194	1071.1	-0.0165314	0.110764	-0.149248	0.881358	1
1305	MSTRG.11195	239.644	0.497038	0.633457	0.784645	0.432662	1
1306	MSTRG.11197	787.156	0.000621282	0.140588	0.00441917	0.996474	1
1307	MSTRG.11198	15.1989	0.0360099	0.819988	0.0439152	0.964972	1
1308	MSTRG.112	3305.12	-0.0855138	0.133105	-0.642453	0.520579	1
1309	MSTRG.11201	608.313	-0.200175	0.376775	-0.531286	0.595221	1
1310	MSTRG.11202	2018.8	-0.0326158	0.124435	-0.26211	0.793236	1
1311	MSTRG.11203	403.284	-0.586802	0.506333	-1.15892	0.246487	1
1312	MSTRG.11204	7.99849	-0.276698	1.08312	-0.255462	0.798366	1
1313	MSTRG.11206	21.7892	0.452609	0.673975	0.671551	0.501869	1
1314	MSTRG.11208	309.53	0.143878	0.196132	0.733579	0.463205	1
1315	MSTRG.11209	581.259	-0.0598803	0.150292	-0.398427	0.690315	1
1316	MSTRG.1121	362.882	-0.0760655	0.190305	-0.399703	0.689375	1
1317	MSTRG.11211	71.7787	0.315514	0.409469	0.770545	0.440977	1
1318	MSTRG.11212	1561.04	-0.10722	0.106139	-1.01018	0.312407	1
1319	MSTRG.11214	423.88	-0.0833086	0.159405	-0.522623	0.601237	1
1320	MSTRG.11215	515.697	-0.0128456	0.147942	-0.0868287	0.930808	1
1321	MSTRG.11216	273.652	-0.0311987	0.222299	-0.140346	0.888387	1
1322	MSTRG.11218	119.852	0.0592372	0.2822	0.209912	0.833736	1
1323	MSTRG.11219	4985.21	-0.135037	0.0865897	-1.5595	0.118878	1
1324	MSTRG.1122	2536.77	-0.0411053	0.0946328	-0.434366	0.664022	1
1325	MSTRG.11220	622.571	-0.0649525	0.139049	-0.46712	0.640414	1
1326	MSTRG.11221	843.259	0.107524	0.122184	0.880014	0.378852	1
1327	MSTRG.11222	31.6608	4.77626	2.31518	2.06301	0.0391113	1
1328	MSTRG.11225	212.547	-0.284345	0.227987	-1.2472	0.212324	1
1329	MSTRG.11227	91.9908	-0.274066	0.320553	-0.854979	0.392563	1
1330	MSTRG.11228	2533.27	-0.0221468	0.08941	-0.247699	0.804367	1
1331	MSTRG.11229	155.387	-0.0195315	0.247037	-0.0790632	0.936982	1
1332	MSTRG.1123	7.55789	1.27696	1.13059	1.12946	0.258702	1
1333	MSTRG.11230	216.499	-0.144022	0.234897	-0.613129	0.539791	1
1334	MSTRG.11231	374.533	-0.076183	0.168063	-0.453299	0.650333	1
1335	MSTRG.11232	15.1891	0.63271	0.797704	0.793164	0.427683	1
1336	MSTRG.11233	7.5951	0.237906	1.16564	0.2041	0.838275	1
1337	MSTRG.11237	346.367	0.179066	0.175279	1.02161	0.306968	1
1338	MSTRG.11238	4443.14	-0.0716128	0.0787584	-0.909273	0.363206	1
1339	MSTRG.11239	35.9646	0.964804	0.538711	1.79095	0.0733012	1
1340	MSTRG.11243	284.317	-0.0266074	0.19203	-0.138558	0.889799	1
1341	MSTRG.11245	565.329	0.0178023	0.140018	0.127143	0.898827	1
1342	MSTRG.11246	851.791	0.206038	0.125171	1.64605	0.0997531	1
1343	MSTRG.11248	244.02	-0.0912783	0.233918	-0.390215	0.696377	1
1344	MSTRG.11249	1611.16	-0.00465461	0.0997385	-0.0466681	0.962778	1
1345	MSTRG.1125	95.6887	-0.267657	0.337063	-0.794087	0.427145	1
1346	MSTRG.11250	2902.21	0.016549	0.0820354	0.201729	0.840128	1
1347	MSTRG.11251	583.276	0.176609	0.159777	1.10534	0.26901	1
1348	MSTRG.11252	52.1185	0.270217	0.443433	0.609374	0.542277	1
1349	MSTRG.11253	15622.4	0.0100204	0.0786131	0.127465	0.898573	1
1350	MSTRG.11254	476.54	0.117724	0.177157	0.664519	0.506358	1
1351	MSTRG.11255	489.042	-0.218109	0.165144	-1.32072	0.186594	1
1352	MSTRG.11256	623.97	-0.0551107	0.141579	-0.389257	0.697086	1
1353	MSTRG.11257	2376.32	0.00911187	0.103395	0.0881268	0.929776	1
1354	MSTRG.11258	757.839	-0.126805	0.129311	-0.980624	0.326778	1
1355	MSTRG.11259	273	0.0882311	0.194094	0.454578	0.649413	1
1356	MSTRG.11260	18472	0.0919125	0.0634647	1.44825	0.147548	1
1357	MSTRG.11262	95.2734	0.0117263	0.369219	0.0317597	0.974664	1
1358	MSTRG.11263	1300.43	0.101431	0.111225	0.91194	0.3618	1
1359	MSTRG.11264	203.119	0.315091	0.265192	1.18816	0.23477	1
1360	MSTRG.11266	547.623	0.05661	0.154709	0.365913	0.71443	1
1361	MSTRG.11267	9.64585	0.0878292	0.955483	0.0919212	0.926761	1
1362	MSTRG.11268	73.1712	-0.05861	0.359807	-0.162893	0.870603	1
1363	MSTRG.11269	7.13504	0.176325	1.15752	0.15233	0.878927	1
1364	MSTRG.1127	537.657	-0.0411923	0.167848	-0.245415	0.806135	1
1365	MSTRG.11270	3867.02	0.0429019	0.0861763	0.497838	0.618598	1
1366	MSTRG.11275	239.026	0.239711	0.238461	1.00524	0.31478	1
1367	MSTRG.11276	22.7413	0.133892	0.651027	0.205662	0.837055	1
1368	MSTRG.11277	31.6534	0.513757	1.42395	0.360798	0.718251	1
1369	MSTRG.11279	8.96186	0.692203	1.22429	0.565393	0.571806	1
1370	MSTRG.1128	10.8285	0.020481	0.906701	0.0225885	0.981979	1
1371	MSTRG.11282	9.65196	-0.0841301	1.00426	-0.083773	0.933237	1
1372	MSTRG.11283	1265.14	0.152075	0.111581	1.36291	0.17291	1
1373	MSTRG.11284	29.2484	0.284532	0.562131	0.506167	0.61274	1
1374	MSTRG.11285	11.1052	-0.239511	0.962941	-0.248729	0.80357	1
1375	MSTRG.11286	198.411	0.209866	0.228899	0.916851	0.359221	1
1376	MSTRG.11288	158.532	0.292494	0.263118	1.11165	0.26629	1
1377	MSTRG.11289	1285.53	-0.0279661	0.1048	-0.266851	0.789584	1
1378	MSTRG.1129	2581.06	-0.0116676	0.0910677	-0.12812	0.898054	1
1379	MSTRG.11290	1357.77	-0.0261974	0.109749	-0.238703	0.811336	1
1380	MSTRG.11291	322.674	0.439553	0.199255	2.20598	0.0273851	1
1381	MSTRG.11292	2273.76	-0.0632812	0.0978136	-0.646958	0.517659	1
1382	MSTRG.11293	40.0469	0.493392	0.515881	0.956408	0.338866	1
1383	MSTRG.11294	19225.9	0.0185847	0.0822046	0.226079	0.82114	1
1384	MSTRG.11296	1561.97	-0.0701873	0.102805	-0.682723	0.494782	1
1385	MSTRG.11299	26.5185	0.583892	0.649482	0.899012	0.368646	1
1386	MSTRG.113	8930.41	-0.0310199	0.0699795	-0.443271	0.657569	1
1387	MSTRG.1130	712.335	0.0468427	0.13312	0.351884	0.724925	1
1388	MSTRG.11300	108.305	-0.0833308	0.303068	-0.274957	0.783349	1
1389	MSTRG.11301	42.9067	-0.316531	0.455297	-0.695218	0.486919	1
1390	MSTRG.11302	2034.68	-0.00548414	0.0926754	-0.0591758	0.952812	1
1391	MSTRG.11303	119.987	0.143615	0.289142	0.496692	0.619406	1
1392	MSTRG.11305	665.861	0.0540747	0.13719	0.39416	0.693463	1
1393	MSTRG.11306	13.8677	0.960809	0.861383	1.11543	0.264668	1
1394	MSTRG.11307	16.4261	-0.15564	0.726007	-0.214378	0.830253	1
1395	MSTRG.11308	2904.69	-0.0744233	0.0913854	-0.814389	0.415422	1
1396	MSTRG.11309	876.788	-0.0364759	0.118842	-0.306928	0.758898	1
1397	MSTRG.1131	568.1	-0.169999	0.165817	-1.02522	0.305258	1
1398	MSTRG.11310	547.605	-0.178931	0.147401	-1.21391	0.224784	1
1399	MSTRG.11311	103.5	-0.283709	0.311339	-0.911256	0.362161	1
1400	MSTRG.11313	122.035	0.0314731	0.307932	0.102208	0.918592	1
1401	MSTRG.11314	11.9741	0.30382	0.850737	0.357125	0.720998	1
1402	MSTRG.11316	527.073	0.0278751	0.149747	0.186148	0.852329	1
1403	MSTRG.11319	191.071	0.161969	0.268059	0.604228	0.545692	1
1404	MSTRG.1132	142.483	0.106251	0.263163	0.403747	0.686399	1
1405	MSTRG.11321	361.526	0.0871097	0.176356	0.493941	0.621347	1
1406	MSTRG.11322	112.244	-0.152894	0.418556	-0.36529	0.714895	1
1407	MSTRG.11323	820.152	0.0184944	0.126383	0.146336	0.883656	1
1408	MSTRG.11324	314.583	-0.131067	0.189651	-0.691095	0.489506	1
1409	MSTRG.11325	555.879	-0.1041	0.143313	-0.726385	0.467603	1
1410	MSTRG.11326	2175.46	0.00423502	0.094908	0.0446223	0.964408	1
1411	MSTRG.11327	444.573	-0.0719515	0.156301	-0.460338	0.645273	1
1412	MSTRG.11329	645.421	0.0433167	0.1354	0.319916	0.749032	1
1413	MSTRG.1133	384.788	-0.0235241	0.177454	-0.132565	0.894538	1
1414	MSTRG.11330	14.8848	1.05161	0.848688	1.2391	0.215308	1
1415	MSTRG.11331	659.043	-0.0325939	0.135869	-0.239892	0.810414	1
1416	MSTRG.11332	598.76	-0.0333979	0.139032	-0.240217	0.810162	1
1417	MSTRG.11333	39.8816	0.0756879	0.505715	0.149665	0.881029	1
1418	MSTRG.11334	76.4988	0.105365	0.345774	0.304723	0.760577	1
1419	MSTRG.11335	25.8499	0.504236	0.607257	0.83035	0.406341	1
1420	MSTRG.11337	20.7328	0.180745	0.671038	0.269351	0.78766	1
1421	MSTRG.11339	2408.48	0.0548618	0.10061	0.545289	0.585555	1
1422	MSTRG.1134	1162.88	-0.138148	0.114144	-1.2103	0.226165	1
1423	MSTRG.11340	814.925	0.10403	0.128886	0.807149	0.419581	1
1424	MSTRG.11341	402.298	0.197833	0.16254	1.21714	0.223552	1
1425	MSTRG.11342	320.996	0.0159918	0.19939	0.0802037	0.936075	1
1426	MSTRG.11343	3506.58	-0.0868737	0.0870546	-0.997922	0.318317	1
1427	MSTRG.11345	87.6752	-0.0344385	0.34862	-0.0987852	0.921309	1
1428	MSTRG.11346	75.1976	-0.186234	0.376906	-0.494112	0.621227	1
1429	MSTRG.11347	1299.35	0.439926	0.401405	1.09596	0.273094	1
1430	MSTRG.11348	116.277	0.0938733	0.312246	0.300639	0.76369	1
1431	MSTRG.1135	639.589	-0.0358272	0.146361	-0.244787	0.806622	1
1432	MSTRG.11351	1415.93	0.00998977	0.100057	0.099841	0.920471	1
1433	MSTRG.11352	25.0851	0.136005	0.620346	0.219241	0.826462	1
1434	MSTRG.11354	12.1167	-0.407869	0.84234	-0.484209	0.628238	1
1435	MSTRG.11355	378.961	0.217949	0.183104	1.1903	0.233929	1
1436	MSTRG.11356	503.996	0.0647403	0.176658	0.366473	0.714012	1
1437	MSTRG.11357	108.899	-0.196351	0.29377	-0.668383	0.503889	1
1438	MSTRG.11358	11.5188	-0.420541	0.873022	-0.481707	0.630014	1
1439	MSTRG.11359	355.462	0.203353	0.178782	1.13743	0.255357	1
1440	MSTRG.1136	13.5274	0.86286	0.956415	0.902181	0.366961	1
1441	MSTRG.11360	28.6661	0.171506	0.571289	0.300208	0.764018	1
1442	MSTRG.11362	619.414	-0.0564882	0.139936	-0.403671	0.686455	1
1443	MSTRG.11363	38.2199	-0.176028	0.480506	-0.366339	0.714112	1
1444	MSTRG.11364	20.8203	1.01251	0.707927	1.43024	0.152647	1
1445	MSTRG.11366	349.968	0.112349	0.172927	0.649687	0.515894	1
1446	MSTRG.11369	331.316	0.220109	0.178174	1.23536	0.216697	1
1447	MSTRG.1137	2653.06	-0.071644	0.0855775	-0.837183	0.40249	1
1448	MSTRG.11370	1085.72	0.212235	0.110683	1.9175	0.0551741	1
1449	MSTRG.11371	554.197	0.00632663	0.147709	0.0428318	0.965836	1
1450	MSTRG.11373	2480.46	0.0343702	0.0884775	0.388463	0.697674	1
1451	MSTRG.11374	156.379	0.297149	0.250683	1.18536	0.235876	1
1452	MSTRG.11376	12.4947	0.348627	0.844096	0.413019	0.679593	1
1453	MSTRG.11377	53.3411	-0.359195	0.460126	-0.780644	0.435012	1
1454	MSTRG.11378	354.892	0.04857	0.174908	0.277689	0.781251	1
1455	MSTRG.11379	49.3499	0.125739	0.433462	0.29008	0.771755	1
1456	MSTRG.1138	1203.26	0.0305851	0.129357	0.23644	0.813091	1
1457	MSTRG.11380	561.507	0.0176168	0.146228	0.120475	0.904107	1
1458	MSTRG.11382	29.0606	-0.0519154	0.566103	-0.0917067	0.926931	1
1459	MSTRG.11383	1303.74	0.127672	0.106004	1.20441	0.228433	1
1460	MSTRG.11384	7.12887	1.03824	1.14759	0.904712	0.365618	1
1461	MSTRG.11385	507.23	-0.00125662	0.149085	-0.00842889	0.993275	1
1462	MSTRG.11386	143.777	0.01949	0.250869	0.07769	0.938075	1
1463	MSTRG.11388	14.4638	-0.341764	0.814236	-0.419736	0.674679	1
1464	MSTRG.11389	1405.77	-0.0981072	0.1226	-0.800221	0.423583	1
1465	MSTRG.1139	235.14	-0.162502	0.257535	-0.630988	0.528048	1
1466	MSTRG.11390	23467.1	-0.011867	0.0672852	-0.176369	0.860004	1
1467	MSTRG.11391	16.1544	-0.69242	0.729978	-0.948549	0.34285	1
1468	MSTRG.11393	32.2164	-0.481753	0.551461	-0.873593	0.38234	1
1469	MSTRG.11394	197.195	0.210291	0.229199	0.917502	0.35888	1
1470	MSTRG.11395	233.692	-0.0767272	0.202363	-0.379156	0.704572	1
1471	MSTRG.11396	581.363	-0.240292	0.174731	-1.37521	0.169065	1
1472	MSTRG.11397	1850.82	-0.0265233	0.0920053	-0.28828	0.773132	1
1473	MSTRG.11398	897.342	-0.108497	0.119137	-0.910693	0.362457	1
1474	MSTRG.11399	353.043	0.137534	0.189924	0.72415	0.468973	1
1475	MSTRG.114	176.93	0.142639	0.230332	0.619273	0.535736	1
1476	MSTRG.1140	2637.54	-0.00883138	0.10813	-0.0816739	0.934906	1
1477	MSTRG.11400	110.98	0.177157	0.306219	0.57853	0.562906	1
1478	MSTRG.11401	337.601	-0.104741	0.175312	-0.597457	0.550202	1
1479	MSTRG.11402	992.567	-0.0795198	0.130692	-0.608451	0.542888	1
1480	MSTRG.11403	951.323	-0.0156231	0.119941	-0.130257	0.896363	1
1481	MSTRG.11404	650.488	0.0792558	0.134819	0.587867	0.556622	1
1482	MSTRG.11405	64.2614	0.528968	0.411088	1.28675	0.198181	1
1483	MSTRG.11406	1605.88	-0.0764856	0.113681	-0.672808	0.501069	1
1484	MSTRG.11407	463.76	-0.06038	0.150629	-0.400853	0.688528	1
1485	MSTRG.11408	83.2315	-0.171534	0.330007	-0.51979	0.60321	1
1486	MSTRG.11409	19.6047	0.164097	0.68357	0.240059	0.810285	1
1487	MSTRG.1141	3224.62	-0.100214	0.0942169	-1.06365	0.287488	1
1488	MSTRG.11411	15.2066	-0.619269	0.753675	-0.821666	0.411267	1
1489	MSTRG.11412	5123.54	-0.042422	0.092268	-0.459769	0.645682	1
1490	MSTRG.11413	2487.6	-0.0766263	0.0906329	-0.845458	0.397855	1
1491	MSTRG.11414	286.543	-0.0517095	0.194375	-0.26603	0.790216	1
1492	MSTRG.11415	1192.61	-0.0278999	0.105248	-0.265087	0.790942	1
1493	MSTRG.11416	205.483	0.308954	0.240602	1.28409	0.199112	1
1494	MSTRG.11419	2724.65	0.0301338	0.0880559	0.342212	0.732192	1
1495	MSTRG.11420	27.6242	0.19487	0.595962	0.326984	0.74368	1
1496	MSTRG.11421	21384.1	-0.011597	0.0640088	-0.181178	0.856228	1
1497	MSTRG.11422	211.028	0.160015	0.213952	0.747901	0.45452	1
1498	MSTRG.11423	18013	0.111762	0.0683562	1.63499	0.102051	1
1499	MSTRG.11424	82.3777	-0.138923	0.334743	-0.415013	0.678132	1
1500	MSTRG.11426	121.102	-0.112515	0.286253	-0.39306	0.694275	1
1501	MSTRG.11427	219.499	-0.0246674	0.216858	-0.113749	0.909437	1
1502	MSTRG.11428	713.044	-0.0818071	0.130841	-0.625242	0.531812	1
1503	MSTRG.11429	1253.35	-0.05004	0.117699	-0.425152	0.670726	1
1504	MSTRG.11431	799.069	0.170584	0.132921	1.28335	0.19937	1
1505	MSTRG.11432	107.461	-0.0954417	0.3015	-0.316556	0.75158	1
1506	MSTRG.11433	8.16649	-0.718836	1.11247	-0.646162	0.518174	1
1507	MSTRG.11434	405.434	0.262828	0.169858	1.54734	0.121781	1
1508	MSTRG.11435	472.139	-0.105655	0.152163	-0.694351	0.487462	1
1509	MSTRG.11436	3631.03	-0.135063	0.0927159	-1.45674	0.145188	1
1510	MSTRG.11438	1011.36	-0.0524588	0.117133	-0.447856	0.654257	1
1511	MSTRG.11439	156.453	0.339536	0.265125	1.28066	0.200312	1
1512	MSTRG.11440	17.4742	-0.0549388	0.709656	-0.077416	0.938293	1
1513	MSTRG.11441	1666	0.105812	0.104248	1.015	0.310108	1
1514	MSTRG.11442	469.876	-0.0275366	0.178904	-0.153919	0.877674	1
1515	MSTRG.11443	744.966	-0.0383483	0.128483	-0.298469	0.765345	1
1516	MSTRG.11444	556.345	-0.120268	0.149556	-0.804164	0.421302	1
1517	MSTRG.11445	3340.12	0.0198268	0.0901627	0.2199	0.825949	1
1518	MSTRG.11447	475.154	0.0113519	0.151248	0.0750548	0.940171	1
1519	MSTRG.11448	161.196	-0.0794136	0.241694	-0.32857	0.74248	1
1520	MSTRG.11449	1170.07	-0.1209	0.132882	-0.909832	0.362911	1
1521	MSTRG.1145	628.588	-0.0422008	0.152453	-0.276811	0.781925	1
1522	MSTRG.11450	385.343	0.0968469	0.169536	0.571246	0.567833	1
1523	MSTRG.11454	387.855	-0.220728	0.166216	-1.32796	0.184192	1
1524	MSTRG.11455	195.968	-0.089593	0.235659	-0.38018	0.703812	1
1525	MSTRG.11457	1679.63	0.0324687	0.102541	0.31664	0.751517	1
1526	MSTRG.11458	22265.1	0.035605	0.0959424	0.371108	0.710557	1
1527	MSTRG.11459	1218.09	-0.100173	0.113089	-0.885792	0.37573	1
1528	MSTRG.1146	78.2468	-0.111571	0.372991	-0.299124	0.764845	1
1529	MSTRG.11460	193.501	-0.125224	0.224153	-0.558652	0.576399	1
1530	MSTRG.11461	230.105	0.204171	0.208202	0.980638	0.326771	1
1531	MSTRG.11462	18.4959	0.834818	0.738046	1.13112	0.258004	1
1532	MSTRG.11463	78.6935	-0.0947887	0.34884	-0.271725	0.785833	1
1533	MSTRG.11464	29.2012	0.328006	0.572491	0.572945	0.566682	1
1534	MSTRG.11465	36.2913	0.119771	0.512962	0.233489	0.815382	1
1535	MSTRG.11466	804.834	0.162904	0.138582	1.1755	0.239794	1
1536	MSTRG.11467	1591.59	-0.100435	0.0972404	-1.03286	0.301672	1
1537	MSTRG.11468	18.8049	1.16705	0.730838	1.59687	0.110294	1
1538	MSTRG.11469	329.779	0.221222	0.194424	1.13783	0.255192	1
1539	MSTRG.1147	126.385	0.474274	0.291551	1.62673	0.103795	1
1540	MSTRG.11470	12.7506	0.42272	0.864637	0.488899	0.624914	1
1541	MSTRG.11471	563.361	0.121406	0.148245	0.818955	0.412812	1
1542	MSTRG.11472	21.3443	0.357306	0.682101	0.523832	0.600395	1
1543	MSTRG.11473	212.985	0.0539572	0.218024	0.247483	0.804534	1
1544	MSTRG.11474	946.257	-0.0188995	0.165191	-0.11441	0.908913	1
1545	MSTRG.11476	681.218	-0.199664	0.139318	-1.43315	0.151815	1
1546	MSTRG.11477	518.234	-0.0150801	0.147243	-0.102417	0.918426	1
1547	MSTRG.11480	25.5916	-0.104542	0.605558	-0.172637	0.862936	1
1548	MSTRG.11481	365.014	0.126569	0.185125	0.683692	0.49417	1
1549	MSTRG.11482	241.992	0.0390399	0.241582	0.161601	0.87162	1
1550	MSTRG.11483	336.716	0.0681967	0.178003	0.38312	0.701631	1
1551	MSTRG.11484	801.265	-0.031198	0.130038	-0.239914	0.810397	1
1552	MSTRG.11485	335.724	-0.399214	0.177866	-2.24447	0.0248023	1
1553	MSTRG.11486	12.3986	0.365553	0.845493	0.432355	0.665484	1
1554	MSTRG.11487	11.525	-0.64764	0.881632	-0.734593	0.462587	1
1555	MSTRG.11488	1274	-0.0357972	0.104794	-0.341596	0.732655	1
1556	MSTRG.11489	50.0586	0.706937	0.442486	1.59765	0.110121	1
1557	MSTRG.1149	99.5681	0.19728	0.319151	0.61814	0.536483	1
1558	MSTRG.11491	419.658	-0.0348754	0.160347	-0.217499	0.827819	1
1559	MSTRG.11493	1137.54	-0.088039	0.109639	-0.802989	0.421981	1
1560	MSTRG.11494	912.344	0.00184309	0.129954	0.0141826	0.988684	1
1561	MSTRG.11495	40.8404	1.1561	0.555131	2.08257	0.0372904	1
1562	MSTRG.11496	263.353	0.429635	0.247913	1.73301	0.0830946	1
1563	MSTRG.11497	1427.88	0.221021	0.107892	2.04854	0.0405074	1
1564	MSTRG.11498	504.696	0.0364599	0.148494	0.24553	0.806046	1
1565	MSTRG.11500	670.638	-0.00374121	0.137904	-0.0271291	0.978357	1
1566	MSTRG.11502	169.65	0.0171819	0.251218	0.0683943	0.945472	1
1567	MSTRG.11503	403.52	0.162881	0.165655	0.983252	0.325483	1
1568	MSTRG.11504	1942.07	-0.0858743	0.103408	-0.830439	0.40629	1
1569	MSTRG.11505	7.17658	1.81643	1.27563	1.42394	0.154462	1
1570	MSTRG.11506	502.035	-0.112567	0.14817	-0.759719	0.447423	1
1571	MSTRG.11507	462.619	-0.0571714	0.177551	-0.322	0.747453	1
1572	MSTRG.11508	8.03819	-0.0160081	1.04074	-0.0153814	0.987728	1
1573	MSTRG.1151	14.6874	0.916038	0.872876	1.04945	0.293972	1
1574	MSTRG.11512	74.5714	0.222264	0.359331	0.618549	0.536213	1
1575	MSTRG.11513	21.5507	-0.146399	0.676131	-0.216525	0.828579	1
1576	MSTRG.11516	28.1224	-0.0991306	0.587785	-0.168651	0.866071	1
1577	MSTRG.11517	29.3924	0.364646	0.603838	0.60388	0.545923	1
1578	MSTRG.11518	269.378	-0.183382	0.213195	-0.860162	0.3897	1
1579	MSTRG.11519	2569.58	-0.0723832	0.0878581	-0.823865	0.410017	1
1580	MSTRG.1152	686.515	-0.131832	0.134708	-0.978648	0.327754	1
1581	MSTRG.11520	1023.81	-0.01524	0.119603	-0.127422	0.898606	1
1582	MSTRG.11521	9444.15	-0.0216496	0.0665753	-0.325189	0.745038	1
1583	MSTRG.11523	2223.89	-0.0667174	0.0935779	-0.712961	0.47587	1
1584	MSTRG.11524	2625.68	-0.0688384	0.0970206	-0.709524	0.478	1
1585	MSTRG.11525	436.798	0.210809	0.162788	1.29499	0.195324	1
1586	MSTRG.11527	7447.63	-0.0829525	0.0975825	-0.850076	0.395283	1
1587	MSTRG.1153	1230.3	-0.729928	0.749307	-0.974138	0.329988	1
1588	MSTRG.11530	319.5	0.089119	0.17976	0.495766	0.620059	1
1589	MSTRG.11531	48757.6	0.066812	0.0631779	1.05752	0.290273	1
1590	MSTRG.11532	1340.35	0.0131851	0.101906	0.129384	0.897054	1
1591	MSTRG.11533	88.1185	0.0634209	0.333643	0.190086	0.849241	1
1592	MSTRG.11535	642.282	0.00568864	0.138855	0.0409681	0.967321	1
1593	MSTRG.11536	338.079	0.0308376	0.188989	0.163172	0.870383	1
1594	MSTRG.11537	376.54	-0.0272755	0.173462	-0.157242	0.875054	1
1595	MSTRG.11538	11.6662	0.213988	1.19292	0.179382	0.857638	1
1596	MSTRG.1154	64.7678	0.17962	0.416578	0.43118	0.666338	1
1597	MSTRG.11541	355.363	0.0620567	0.182623	0.339807	0.734002	1
1598	MSTRG.11542	86.2722	-0.065575	0.361449	-0.181422	0.856036	1
1599	MSTRG.11544	12.4232	0.329344	0.978925	0.336434	0.736543	1
1600	MSTRG.11545	10.3929	-0.361407	0.989876	-0.365103	0.715034	1
1601	MSTRG.11547	690.64	-0.0135971	0.139431	-0.097518	0.922315	1
1602	MSTRG.11549	42.0626	0.123108	0.514069	0.239478	0.810735	1
1603	MSTRG.1155	85.8463	0.218536	0.353806	0.617673	0.536791	1
1604	MSTRG.11550	77.9697	-0.127521	0.377565	-0.337746	0.735554	1
1605	MSTRG.11551	347.125	0.0762229	0.177776	0.428758	0.6681	1
1606	MSTRG.11552	13.4844	-0.0189286	0.840013	-0.0225337	0.982022	1
1607	MSTRG.11555	7476.37	-0.0321357	0.0711744	-0.451507	0.651624	1
1608	MSTRG.11556	402.037	0.0825124	0.166588	0.495308	0.620383	1
1609	MSTRG.11557	1420.66	-0.187396	0.105625	-1.77417	0.0760349	1
1610	MSTRG.11558	835.565	-0.245059	0.140762	-1.74095	0.0816929	1
1611	MSTRG.1156	602.16	0.0657844	0.14255	0.461482	0.644453	1
1612	MSTRG.11561	18.4993	-0.023645	0.714442	-0.0330958	0.973598	1
1613	MSTRG.11563	17.0971	-0.410264	0.731151	-0.56112	0.574715	1
1614	MSTRG.11564	88.5575	-0.693849	0.334062	-2.07701	0.0378008	1
1615	MSTRG.11567	2053.6	-0.108221	0.12533	-0.863491	0.387868	1
1616	MSTRG.11568	88.9117	0.053543	0.31428	0.170367	0.864721	1
1617	MSTRG.11569	1278.14	-0.282395	0.141282	-1.99881	0.0456292	1
1618	MSTRG.11571	704.421	-0.0776109	0.128561	-0.603688	0.546051	1
1619	MSTRG.11572	28.7472	0.114898	0.56607	0.202975	0.839154	1
1620	MSTRG.11576	58.9491	-0.0607042	0.400543	-0.151555	0.879538	1
1621	MSTRG.11577	1059.45	0.0187618	0.111591	0.16813	0.866481	1
1622	MSTRG.11578	1099.13	0.0954394	0.108773	0.877415	0.380261	1
1623	MSTRG.11579	9.76089	-1.43931	0.967834	-1.48714	0.136977	1
1624	MSTRG.1158	87.6357	0.045946	0.326181	0.14086	0.88798	1
1625	MSTRG.11580	261.717	-0.0717773	0.232444	-0.308794	0.757478	1
1626	MSTRG.11581	11.0557	-0.0222201	0.893792	-0.0248605	0.980166	1
1627	MSTRG.11582	8.51813	0.355602	1.02369	0.347371	0.728313	1
1628	MSTRG.11583	36.5723	0.643145	0.517584	1.24259	0.214019	1
1629	MSTRG.11585	943.21	0.0369928	0.11639	0.317836	0.75061	1
1630	MSTRG.11586	11.357	0.201291	0.914355	0.220145	0.825758	1
1631	MSTRG.11587	32.8988	-0.544405	0.542398	-1.0037	0.315523	1
1632	MSTRG.11588	51.1639	-0.310734	0.457643	-0.678987	0.497146	1
1633	MSTRG.11589	350.159	0.0199568	0.191547	0.104187	0.917021	1
1634	MSTRG.1159	229.953	-0.181769	0.208092	-0.873507	0.382387	1
1635	MSTRG.11591	11.4921	0.905686	0.909295	0.996031	0.319235	1
1636	MSTRG.11592	12831.8	0.0306928	0.0663827	0.462361	0.643822	1
1637	MSTRG.11594	911.323	0.0503072	0.124432	0.404296	0.685995	1
1638	MSTRG.11595	99.9342	-0.125955	0.318041	-0.396033	0.692081	1
1639	MSTRG.11596	62.2772	-0.261222	0.44454	-0.587624	0.556785	1
1640	MSTRG.11597	164.965	0.0644644	0.250705	0.257133	0.797076	1
1641	MSTRG.11598	12.3472	-0.585831	0.85474	-0.68539	0.493098	1
1642	MSTRG.11599	350.61	0.0730854	0.173766	0.420598	0.674049	1
1643	MSTRG.116	173.037	0.0594297	0.244295	0.24327	0.807796	1
1644	MSTRG.1160	446.688	-0.148153	0.158413	-0.935233	0.349668	1
1645	MSTRG.11600	74.2847	-0.376129	0.407187	-0.923726	0.355629	1
1646	MSTRG.11601	316.222	-0.112437	0.179937	-0.624867	0.532059	1
1647	MSTRG.11602	353.749	0.0427668	0.180792	0.236552	0.813004	1
1648	MSTRG.11603	2366.81	-0.0614144	0.0900173	-0.682251	0.49508	1
1649	MSTRG.11604	190.584	0.0385201	0.226338	0.170189	0.864862	1
1650	MSTRG.11605	275.917	0.0251989	0.190559	0.132237	0.894797	1
1651	MSTRG.11606	28.3457	0.422107	0.564944	0.747167	0.454963	1
1652	MSTRG.11607	963.851	-0.0572854	0.116723	-0.490779	0.623582	1
1653	MSTRG.11608	523.788	-0.0782234	0.146372	-0.534413	0.593056	1
1654	MSTRG.11609	285.304	-0.279686	0.250918	-1.11465	0.265001	1
1655	MSTRG.1161	18.748	0.390351	0.76249	0.511943	0.608691	1
1656	MSTRG.11610	9.96686	0.249037	0.946306	0.263167	0.792422	1
1657	MSTRG.11611	51.4133	0.0218565	0.450686	0.048496	0.961321	1
1658	MSTRG.11612	1433.79	-0.215099	0.140107	-1.53524	0.124725	1
1659	MSTRG.11613	1177.94	-0.0561171	0.106597	-0.526443	0.59858	1
1660	MSTRG.11614	857.98	-0.0134254	0.180544	-0.074361	0.940723	1
1661	MSTRG.11615	827.217	-0.130861	0.117957	-1.10939	0.26726	1
1662	MSTRG.11616	1301.78	0.141386	0.10928	1.2938	0.195736	1
1663	MSTRG.11617	355.224	-0.0434381	0.177014	-0.245394	0.806151	1
1664	MSTRG.11619	13.3306	0.104251	0.85681	0.121673	0.903158	1
1665	MSTRG.1162	154.551	-0.064858	0.2443	-0.265485	0.790636	1
1666	MSTRG.11623	8.10323	-0.689886	1.11386	-0.619363	0.535677	1
1667	MSTRG.11624	32.3959	0.0262204	0.5892	0.0445018	0.964504	1
1668	MSTRG.11625	521.529	-0.107511	0.161991	-0.663685	0.506892	1
1669	MSTRG.11626	799.525	-0.0711014	0.122947	-0.578308	0.563056	1
1670	MSTRG.11629	20.0435	-0.141949	0.670325	-0.211761	0.832294	1
1671	MSTRG.1163	2767.56	-0.0835462	0.0839926	-0.994685	0.319889	1
1672	MSTRG.11631	246.149	-0.073385	0.205528	-0.357056	0.72105	1
1673	MSTRG.11632	1157.28	-0.0502113	0.108902	-0.461067	0.64475	1
1674	MSTRG.11633	1624.5	-0.13161	0.0992611	-1.3259	0.184873	1
1675	MSTRG.11634	732.069	-0.109656	0.131021	-0.836941	0.402626	1
1676	MSTRG.11635	820.333	-0.0996724	0.121764	-0.818571	0.413031	1
1677	MSTRG.11636	6136.79	-0.0438873	0.0768043	-0.571417	0.567717	1
1678	MSTRG.11637	15.6487	-0.256733	0.810338	-0.316822	0.751379	1
1679	MSTRG.11639	11.5628	0.892744	1.00055	0.892251	0.372259	1
1680	MSTRG.1164	521.616	-0.0938716	0.146784	-0.639521	0.522484	1
1681	MSTRG.11642	7179.61	0.0203244	0.225501	0.09013	0.928184	1
1682	MSTRG.11643	69.1601	0.131062	0.37596	0.348606	0.727385	1
1683	MSTRG.11644	1136.93	0.0269851	0.116546	0.231541	0.816895	1
1684	MSTRG.11646	21.929	-0.0633287	0.665644	-0.0951391	0.924204	1
1685	MSTRG.11647	101.095	-0.396491	0.320546	-1.23692	0.216116	1
1686	MSTRG.11648	949.951	0.0119455	0.12044	0.0991818	0.920994	1
1687	MSTRG.11649	2238.02	-0.186497	0.150934	-1.23562	0.2166	1
1688	MSTRG.11650	135.981	-0.383818	0.290995	-1.31899	0.187174	1
1689	MSTRG.11651	113.418	0.0730275	0.327402	0.223052	0.823495	1
1690	MSTRG.11652	694.739	-0.0844582	0.131131	-0.644074	0.519528	1
1691	MSTRG.11653	15.3974	-0.0836881	0.786607	-0.106391	0.915272	1
1692	MSTRG.11654	1279.72	-0.165897	0.108381	-1.53069	0.125847	1
1693	MSTRG.11655	106.938	0.037222	0.293442	0.126846	0.899062	1
1694	MSTRG.11656	14.3187	-0.533432	0.809951	-0.658597	0.510154	1
1695	MSTRG.11657	178.163	-0.126461	0.245174	-0.515801	0.605993	1
1696	MSTRG.11659	54.4082	-0.0076423	0.435951	-0.0175302	0.986014	1
1697	MSTRG.1166	89.5445	-0.158602	0.324207	-0.489201	0.6247	1
1698	MSTRG.11660	9.93111	-0.369228	0.990488	-0.372774	0.709317	1
1699	MSTRG.11661	9.79965	-0.926077	0.993838	-0.931819	0.35143	1
1700	MSTRG.11663	98.9193	-0.128604	0.426697	-0.301394	0.763114	1
1701	MSTRG.11664	26.0807	-0.0616506	0.711628	-0.0866332	0.930963	1
1702	MSTRG.11666	606.106	-0.349276	0.517382	-0.675085	0.499622	1
1703	MSTRG.11667	17.4531	-0.902156	0.737427	-1.22338	0.221185	1
1704	MSTRG.11668	29.6793	0.130353	0.590965	0.220577	0.825422	1
1705	MSTRG.11669	84.8039	-0.00358818	0.343938	-0.0104326	0.991676	1
1706	MSTRG.11670	522.463	0.0366783	0.144228	0.254307	0.799258	1
1707	MSTRG.11671	413.37	-0.035542	0.891021	-0.0398891	0.968182	1
1708	MSTRG.11672	11493.7	-0.118993	0.0748834	-1.58905	0.112049	1
1709	MSTRG.11673	130.907	-0.00138697	0.294516	-0.00470931	0.996243	1
1710	MSTRG.11674	647.597	-0.0459962	0.133929	-0.343438	0.731269	1
1711	MSTRG.11675	2551.88	-0.0382249	0.0891348	-0.428844	0.668037	1
1712	MSTRG.11676	5592.84	0.0361041	0.0841688	0.428949	0.66796	1
1713	MSTRG.11677	338.463	-0.108868	0.176672	-0.616214	0.537753	1
1714	MSTRG.11678	375.703	-0.0326546	0.174073	-0.187591	0.851197	1
1715	MSTRG.11679	145.448	-0.0278418	0.272563	-0.102148	0.918639	1
1716	MSTRG.11681	9.68253	-0.607218	1.04228	-0.582588	0.560171	1
1717	MSTRG.11682	146.36	-0.370578	0.258489	-1.43363	0.151677	1
1718	MSTRG.11684	21.9642	0.44083	0.824138	0.534899	0.59272	1
1719	MSTRG.11685	193.513	0.0960615	0.241439	0.397871	0.690725	1
1720	MSTRG.11686	9.6212	0.0572335	0.985515	0.0580747	0.953689	1
1721	MSTRG.11687	3164.69	0.015523	0.0815863	0.190265	0.849102	1
1722	MSTRG.1169	2779.59	0.0233442	0.0832841	0.280296	0.779251	1
1723	MSTRG.11690	11.4316	0.265058	0.874133	0.303224	0.761719	1
1724	MSTRG.11691	11.7688	-0.788641	0.93049	-0.847554	0.396687	1
1725	MSTRG.11692	11.056	0.0259674	0.879353	0.0295301	0.976442	1
1726	MSTRG.11695	45.3786	0.0809735	0.492447	0.164431	0.869392	1
1727	MSTRG.11696	79.5851	0.330702	0.356091	0.928702	0.353044	1
1728	MSTRG.11697	4971.85	-0.111079	0.0830544	-1.33743	0.181083	1
1729	MSTRG.11699	31821.6	-0.0807249	0.0696754	-1.15859	0.246625	1
1730	MSTRG.117	14.0078	0.75181	0.806017	0.932746	0.350951	1
1731	MSTRG.1170	1573.15	-0.0686768	0.0982706	-0.698854	0.484644	1
1732	MSTRG.11701	18.9109	-0.317657	0.703887	-0.451289	0.651781	1
1733	MSTRG.11702	2057.38	-0.0551826	0.108466	-0.508754	0.610925	1
1734	MSTRG.11704	63.5196	-0.347487	0.377334	-0.9209	0.357103	1
1735	MSTRG.11705	8841.84	-0.0431477	0.0717902	-0.601025	0.547823	1
1736	MSTRG.11706	66439	-0.19206	0.32847	-0.584713	0.558741	1
1737	MSTRG.11707	57.2514	-0.169864	0.410035	-0.414267	0.678679	1
1738	MSTRG.11709	23.4857	0.0692547	0.652882	0.106075	0.915523	1
1739	MSTRG.1171	18.4156	-0.117831	0.728551	-0.161733	0.871516	1
1740	MSTRG.11710	419.314	-0.234148	0.161586	-1.44907	0.147319	1
1741	MSTRG.11711	23.4328	1.24238	0.712396	1.74394	0.0811698	1
1742	MSTRG.11712	197.215	-0.206308	0.219588	-0.939522	0.347463	1
1743	MSTRG.11713	610.877	-0.222627	0.138833	-1.60356	0.108811	1
1744	MSTRG.11714	246.404	-0.0211379	0.203713	-0.103763	0.917357	1
1745	MSTRG.11715	282.403	0.135567	0.197769	0.685481	0.49304	1
1746	MSTRG.11716	10.9092	0.722211	0.905105	0.797931	0.424911	1
1747	MSTRG.11719	1332.91	-0.0422275	0.113619	-0.371659	0.710146	1
1748	MSTRG.1172	8.78055	-0.524007	1.01606	-0.515724	0.606047	1
1749	MSTRG.11720	20.7219	-0.301651	0.665688	-0.453142	0.650447	1
1750	MSTRG.11721	19.969	0.333129	0.683388	0.487467	0.625928	1
1751	MSTRG.11722	421.581	-0.0547095	0.209658	-0.260947	0.794134	1
1752	MSTRG.11723	64.054	0.821261	0.440269	1.86536	0.0621304	1
1753	MSTRG.11724	227.891	0.143408	0.247497	0.579434	0.562296	1
1754	MSTRG.11725	194.867	0.512115	2.01455	0.254208	0.799335	1
1755	MSTRG.11726	19.3679	0.347837	0.697266	0.498858	0.617879	1
1756	MSTRG.11727	625.418	-0.00344943	0.136852	-0.0252056	0.979891	1
1757	MSTRG.11728	569.697	0.100554	0.144467	0.696035	0.486407	1
1758	MSTRG.11729	413.763	0.0096879	0.164206	0.0589985	0.952953	1
1759	MSTRG.1173	14.3167	0.15439	0.79	0.195431	0.845056	1
1760	MSTRG.11732	772.02	0.045721	0.126456	0.361557	0.717683	1
1761	MSTRG.11733	440.379	-0.110591	0.153279	-0.721502	0.470601	1
1762	MSTRG.11734	472.746	-0.125531	0.153262	-0.819061	0.412752	1
1763	MSTRG.11735	162.259	-2.51963e-05	0.248626	-0.000101342	0.999919	1
1764	MSTRG.11737	1066.58	0.0952776	0.120926	0.787899	0.430756	1
1765	MSTRG.11738	37.0984	0.60554	0.499682	1.21185	0.22557	1
1766	MSTRG.11739	751.483	-0.0449812	0.12522	-0.359218	0.719432	1
1767	MSTRG.11740	1163.41	0.00761485	0.107248	0.0710026	0.943396	1
1768	MSTRG.11741	748.037	-0.230338	0.129355	-1.78066	0.0749679	1
1769	MSTRG.11742	255.117	0.0278938	0.213403	0.13071	0.896005	1
1770	MSTRG.11743	308.669	0.0137384	0.188213	0.0729941	0.941811	1
1771	MSTRG.11746	7.7563	0.394991	1.07482	0.367494	0.713251	1
1772	MSTRG.11747	1547.58	0.0239824	0.1022	0.234661	0.814472	1
1773	MSTRG.11748	428.05	-0.01953	0.157981	-0.123623	0.901614	1
1774	MSTRG.11749	656.453	0.000542096	0.135646	0.0039964	0.996811	1
1775	MSTRG.1175	11.8296	0.248749	0.888993	0.27981	0.779623	1
1776	MSTRG.11751	3803.67	-0.0773285	0.082349	-0.939034	0.347713	1
1777	MSTRG.11752	2039.97	-0.102253	0.0987914	-1.03504	0.300652	1
1778	MSTRG.11754	1951.43	0.0767451	0.100698	0.762133	0.445981	1
1779	MSTRG.11755	258.608	0.0724706	0.708904	0.102229	0.918575	1
1780	MSTRG.11756	64.5964	-0.211687	0.38216	-0.553922	0.579632	1
1781	MSTRG.11757	261.779	0.0693759	0.226093	0.306846	0.758961	1
1782	MSTRG.11758	372.842	-0.0113442	0.188725	-0.0601098	0.952068	1
1783	MSTRG.11759	16.6416	-0.127035	0.724453	-0.175352	0.860803	1
1784	MSTRG.1176	276.813	-0.292767	0.213202	-1.37319	0.169693	1
1785	MSTRG.11761	26.3961	-0.153317	0.583643	-0.26269	0.792789	1
1786	MSTRG.11763	7.13764	0.154979	1.14699	0.135118	0.892518	1
1787	MSTRG.11765	229.852	0.184593	0.210891	0.875299	0.381411	1
1788	MSTRG.11766	123.619	-0.0402004	0.276119	-0.145591	0.884244	1
1789	MSTRG.11767	4878.25	0.000671037	0.0783207	0.00856781	0.993164	1
1790	MSTRG.11768	3076.74	-0.150619	0.0924144	-1.62982	0.103139	1
1791	MSTRG.11769	38041.1	-0.0364754	0.0742898	-0.490988	0.623435	1
1792	MSTRG.1177	536.266	0.0585703	0.17925	0.326753	0.743855	1
1793	MSTRG.11770	1268.69	-0.0933593	0.113897	-0.819683	0.412397	1
1794	MSTRG.11771	601.5	0.0169482	0.15546	0.10902	0.913187	1
1795	MSTRG.11772	547.299	-0.14703	0.210012	-0.700104	0.483862	1
1796	MSTRG.11774	188.634	0.330164	0.233367	1.41479	0.15713	1
1797	MSTRG.11775	631.766	-0.138894	0.135764	-1.02305	0.306283	1
1798	MSTRG.11776	385.9	-0.138459	0.199435	-0.694255	0.487522	1
1799	MSTRG.11777	127.939	-0.380923	0.309641	-1.23021	0.21862	1
1800	MSTRG.11778	93.7277	-0.219325	0.328392	-0.667877	0.504212	1
1801	MSTRG.11779	268.732	0.0723385	0.203756	0.355025	0.722571	1
1802	MSTRG.1178	967.912	0.148888	0.123575	1.20484	0.228264	1
1803	MSTRG.11780	218.202	-0.0787681	1.15288	-0.0683227	0.945529	1
1804	MSTRG.11781	471.401	-0.0767506	0.171247	-0.448186	0.654019	1
1805	MSTRG.11782	864.771	-0.0481382	0.121156	-0.397323	0.691129	1
1806	MSTRG.11784	113.977	0.0534398	0.311131	0.17176	0.863626	1
1807	MSTRG.11785	176.293	0.043289	0.248374	0.17429	0.861638	1
1808	MSTRG.11787	185.961	-0.110864	0.246844	-0.449125	0.653342	1
1809	MSTRG.11788	32.156	-0.891201	0.615833	-1.44715	0.147855	1
1810	MSTRG.11791	475.554	0.162303	0.159149	1.01982	0.307813	1
1811	MSTRG.11792	52.8566	0.347133	0.456357	0.760662	0.446859	1
1812	MSTRG.11793	493.575	0.191582	0.164834	1.16227	0.245125	1
1813	MSTRG.11794	171.398	0.150194	0.236689	0.634564	0.525713	1
1814	MSTRG.11795	1258.59	-0.036699	0.108043	-0.33967	0.734105	1
1815	MSTRG.11796	2292.8	0.0901233	0.0886909	1.01615	0.309558	1
1816	MSTRG.11797	36.5957	-0.259002	0.522686	-0.495521	0.620232	1
1817	MSTRG.11799	28.3316	0.378416	0.602049	0.628547	0.529646	1
1818	MSTRG.118	188.906	-0.0873033	0.229086	-0.381094	0.703133	1
1819	MSTRG.1180	36.9274	-0.421742	0.524545	-0.804016	0.421388	1
1820	MSTRG.11800	595.782	-0.0919684	0.152104	-0.604641	0.545418	1
1821	MSTRG.11801	8.63315	0.134917	1.03808	0.129967	0.896592	1
1822	MSTRG.11802	87.906	0.151917	0.339213	0.447851	0.654261	1
1823	MSTRG.11803	252.803	-0.0818959	0.244233	-0.335319	0.737384	1
1824	MSTRG.11804	327.392	0.0184527	0.229706	0.0803321	0.935973	1
1825	MSTRG.11805	977.678	-0.158221	0.11839	-1.33644	0.181405	1
1826	MSTRG.11806	105.421	0.163103	0.298517	0.546377	0.584807	1
1827	MSTRG.11807	4471.27	-0.0365197	0.128272	-0.284705	0.77587	1
1828	MSTRG.11808	1387.05	-0.00773919	0.106012	-0.0730028	0.941804	1
1829	MSTRG.11810	553.702	0.0160099	0.140293	0.114118	0.909144	1
1830	MSTRG.11813	60.9515	-0.131048	0.398082	-0.329198	0.742006	1
1831	MSTRG.11814	2036.77	0.046169	0.0956022	0.482928	0.629147	1
1832	MSTRG.11815	375.057	0.0658003	0.170285	0.386414	0.69919	1
1833	MSTRG.11816	969.531	-0.0779177	0.117198	-0.664836	0.506155	1
1834	MSTRG.11817	485.916	-0.062786	0.413531	-0.151829	0.879322	1
1835	MSTRG.11819	7.75135	0.214964	1.08973	0.197264	0.843621	1
1836	MSTRG.11820	350.676	0.0528023	0.177584	0.297338	0.766209	1
1837	MSTRG.11823	1343.9	-0.0562848	0.120528	-0.466984	0.640512	1
1838	MSTRG.11824	433.13	-0.162779	0.158875	-1.02458	0.305563	1
1839	MSTRG.11825	1185.4	-0.0035592	0.115054	-0.0309349	0.975321	1
1840	MSTRG.11826	21.5549	0.0161131	0.724769	0.0222321	0.982263	1
1841	MSTRG.11827	1162.88	0.117003	0.107738	1.08599	0.277482	1
1842	MSTRG.11832	23.6865	0.508666	0.639212	0.795771	0.426165	1
1843	MSTRG.11833	12.9117	-0.0033202	0.821472	-0.00404177	0.996775	1
1844	MSTRG.11834	8.78946	-0.525917	1.18861	-0.442462	0.658155	1
1845	MSTRG.11835	127.825	0.184897	0.277089	0.667286	0.504589	1
1846	MSTRG.11836	213.448	0.578768	0.245212	2.36028	0.0182611	1
1847	MSTRG.11837	413.948	-0.260909	0.171972	-1.51716	0.129227	1
1848	MSTRG.11838	482.157	0.0977498	0.152531	0.640852	0.521619	1
1849	MSTRG.11839	18.4778	-0.0299237	0.80137	-0.0373407	0.970213	1
1850	MSTRG.1184	63.467	0.661907	0.385287	1.71796	0.0858044	1
1851	MSTRG.11840	168.98	0.207168	0.260439	0.795459	0.426346	1
1852	MSTRG.11845	7.45828	-0.0817099	1.11739	-0.0731258	0.941706	1
1853	MSTRG.11846	829.31	0.0169454	0.12925	0.131106	0.895691	1
1854	MSTRG.11847	413.267	0.00104775	0.173743	0.00603043	0.995188	1
1855	MSTRG.11848	1120.92	-0.125478	0.123646	-1.01482	0.310191	1
1856	MSTRG.11849	1179.06	-0.115171	0.113034	-1.01891	0.308245	1
1857	MSTRG.1185	397.492	-3.96072e-05	0.172901	-0.000229074	0.999817	1
1858	MSTRG.11850	425.029	-0.0733887	0.159291	-0.46072	0.645	1
1859	MSTRG.11851	15.336	-0.0304191	0.767302	-0.0396443	0.968377	1
1860	MSTRG.11852	7.47616	-0.498451	1.05729	-0.471441	0.637326	1
1861	MSTRG.11853	9.39323	-0.405626	1.0171	-0.398805	0.690037	1
1862	MSTRG.11854	1126.41	-0.0263822	0.110941	-0.237803	0.812034	1
1863	MSTRG.11856	600.36	-0.0421219	0.145768	-0.288966	0.772607	1
1864	MSTRG.11857	20.145	-1.01895	3.67339	-0.277386	0.781484	1
1865	MSTRG.11858	121.932	0.0439267	0.301484	0.145701	0.884157	1
1866	MSTRG.11859	54.9662	-0.733093	0.550711	-1.33118	0.183131	1
1867	MSTRG.1186	34.3179	-0.321884	0.534007	-0.60277	0.546662	1
1868	MSTRG.11860	1167.03	-0.131059	0.107929	-1.21431	0.224628	1
1869	MSTRG.11861	28.9105	-0.733606	0.568219	-1.29106	0.196683	1
1870	MSTRG.11862	15.1913	-0.299353	0.895163	-0.334411	0.738069	1
1871	MSTRG.11863	1066.79	-0.0535538	0.114305	-0.468518	0.639414	1
1872	MSTRG.11864	61.3321	0.0926035	0.38705	0.239255	0.810908	1
1873	MSTRG.11865	217.754	-0.041129	0.224056	-0.183566	0.854354	1
1874	MSTRG.11867	11.6723	0.491016	0.904236	0.543018	0.587117	1
1875	MSTRG.11868	11.5486	1.16001	0.943086	1.23001	0.218692	1
1876	MSTRG.11869	142.718	0.0754166	0.269725	0.279606	0.77978	1
1877	MSTRG.1187	9326.05	-0.020785	0.0691368	-0.300635	0.763693	1
1878	MSTRG.11870	383.324	0.0418411	0.187649	0.222975	0.823555	1
1879	MSTRG.11872	2051.69	-0.146043	0.0890144	-1.64067	0.100866	1
1880	MSTRG.11873	45.0382	-0.101004	0.459876	-0.219633	0.826157	1
1881	MSTRG.11876	971.829	-0.00370164	0.114345	-0.0323726	0.974175	1
1882	MSTRG.11877	1103.22	0.0610996	0.128143	0.476809	0.633498	1
1883	MSTRG.11878	44.9843	-0.357693	0.529009	-0.676157	0.498941	1
1884	MSTRG.11879	43.8211	0.310359	0.466705	0.664999	0.506051	1
1885	MSTRG.1188	63.3108	0.0592494	0.389834	0.151986	0.879198	1
1886	MSTRG.11880	126.423	0.091445	0.277587	0.329428	0.741832	1
1887	MSTRG.11881	149.745	0.0254917	0.263782	0.0966395	0.923013	1
1888	MSTRG.11882	683.905	-0.132898	0.129567	-1.02572	0.305026	1
1889	MSTRG.11883	334.288	-0.093362	0.183082	-0.509947	0.610089	1
1890	MSTRG.11884	8.66349	1.04809	1.26571	0.828067	0.407633	1
1891	MSTRG.11886	1055.42	0.146939	0.113587	1.29363	0.195795	1
1892	MSTRG.11887	363.207	-0.00033442	0.17029	-0.00196383	0.998433	1
1893	MSTRG.11889	84.1913	0.488045	0.344499	1.41668	0.156576	1
1894	MSTRG.11890	61.0443	0.0621758	0.409925	0.151676	0.879442	1
1895	MSTRG.11891	21.1819	0.269979	0.673815	0.400673	0.688661	1
1896	MSTRG.11893	93.2563	0.367983	0.313468	1.17391	0.240431	1
1897	MSTRG.11895	1416.97	-0.0566413	0.109475	-0.517391	0.604883	1
1898	MSTRG.11896	370.324	0.116712	0.178763	0.652889	0.513828	1
1899	MSTRG.11897	121.164	0.21999	0.288106	0.763572	0.445122	1
1900	MSTRG.11898	5126.73	-0.0702916	0.0788356	-0.891623	0.372595	1
1901	MSTRG.11899	16.9425	0.982316	0.755381	1.30042	0.193455	1
1902	MSTRG.119	18.4291	-0.244824	0.765076	-0.319999	0.748969	1
1903	MSTRG.1190	558.472	0.0867758	0.151201	0.573912	0.566028	1
1904	MSTRG.11900	15.3973	0.0806339	0.829514	0.0972062	0.922563	1
1905	MSTRG.11901	1016.34	-0.0483874	0.113498	-0.426328	0.669869	1
1906	MSTRG.11902	702.891	-0.0867099	0.13595	-0.637806	0.5236	1
1907	MSTRG.11903	498.678	0.0400219	0.153128	0.261362	0.793813	1
1908	MSTRG.11904	1136.37	-0.0972122	0.115019	-0.845183	0.398008	1
1909	MSTRG.11906	7.74933	0.196059	1.07963	0.181598	0.855898	1
1910	MSTRG.11907	30.4859	-0.266214	0.607001	-0.438573	0.660971	1
1911	MSTRG.11909	17.8933	0.660434	0.725611	0.910177	0.362729	1
1912	MSTRG.1191	28.1418	0.307668	0.570795	0.539017	0.589875	1
1913	MSTRG.11910	213.957	-0.420124	0.238589	-1.76087	0.0782602	1
1914	MSTRG.11912	224.757	0.0767479	0.213791	0.358986	0.719605	1
1915	MSTRG.11913	1082.23	0.0274602	0.126439	0.217182	0.828066	1
1916	MSTRG.11914	958.482	0.0123553	0.12152	0.101673	0.919016	1
1917	MSTRG.11915	17.2268	0.162092	0.751746	0.215621	0.829283	1
1918	MSTRG.11916	757.381	0.0672465	0.131367	0.511896	0.608723	1
1919	MSTRG.11918	23.374	0.08651	0.621665	0.139159	0.889325	1
1920	MSTRG.11919	2315.97	-0.078332	0.0901596	-0.868814	0.384949	1
1921	MSTRG.1192	1043.07	-0.00131391	0.114788	-0.0114463	0.990867	1
1922	MSTRG.11920	40.446	0.246457	0.477035	0.516643	0.605405	1
1923	MSTRG.11921	47.6528	-0.0460667	0.453311	-0.101623	0.919056	1
1924	MSTRG.11922	172.287	0.0401514	0.319745	0.125573	0.90007	1
1925	MSTRG.11923	4503.03	0.0454137	0.0889953	0.510294	0.609846	1
1926	MSTRG.11924	762.311	-0.0461925	0.13168	-0.350793	0.725744	1
1927	MSTRG.11925	472.638	-0.084337	0.155974	-0.540713	0.588705	1
1928	MSTRG.11927	164.274	-0.0683382	0.252619	-0.270519	0.786761	1
1929	MSTRG.11928	21533.2	0.038991	0.0658117	0.592464	0.55354	1
1930	MSTRG.11929	2899.84	-0.138302	0.0838419	-1.64956	0.0990328	1
1931	MSTRG.11930	838.018	-0.0516046	0.121368	-0.42519	0.670698	1
1932	MSTRG.11931	62.5232	0.302836	0.402592	0.752215	0.451922	1
1933	MSTRG.11933	1103.2	-0.0156267	0.108691	-0.143771	0.885681	1
1934	MSTRG.11934	109.733	-0.0503337	0.312587	-0.161023	0.872075	1
1935	MSTRG.11935	782.015	-0.0362917	0.127465	-0.284719	0.77586	1
1936	MSTRG.11937	106.9	0.299734	0.344499	0.870059	0.384268	1
1937	MSTRG.11938	320.796	0.0736234	0.183403	0.401429	0.688104	1
1938	MSTRG.1194	3235	-0.0850197	0.105228	-0.807954	0.419117	1
1939	MSTRG.11940	1778.6	-0.080767	0.0974247	-0.829019	0.407094	1
1940	MSTRG.11941	11.302	-0.320827	0.907677	-0.353459	0.723745	1
1941	MSTRG.11943	6660.42	0.000236113	0.070148	0.00336592	0.997314	1
1942	MSTRG.11947	1664.97	-0.133496	0.101918	-1.30983	0.190252	1
1943	MSTRG.1195	19.3792	0.0969054	0.692555	0.139925	0.88872	1
1944	MSTRG.11952	1005.05	0.254102	0.121431	2.09256	0.0363882	1
1945	MSTRG.11953	8.66315	-0.878673	1.01871	-0.862537	0.388392	1
1946	MSTRG.11957	693.889	-0.0465446	0.132803	-0.350477	0.725981	1
1947	MSTRG.11958	101.224	0.257985	0.304056	0.848476	0.396173	1
1948	MSTRG.11959	1307.02	-0.0648409	0.101702	-0.637556	0.523763	1
1949	MSTRG.1196	263.056	0.0933669	0.195153	0.478429	0.632345	1
1950	MSTRG.11960	347.662	-0.0525544	0.1769	-0.297086	0.766401	1
1951	MSTRG.11962	781.474	-0.117196	0.126805	-0.924227	0.355368	1
1952	MSTRG.11963	917.566	0.0350821	0.121315	0.289181	0.772443	1
1953	MSTRG.11964	354.54	-0.0075697	0.181592	-0.0416852	0.96675	1
1954	MSTRG.11966	7.27439	-0.30624	1.1496	-0.266388	0.78994	1
1955	MSTRG.11967	2721.95	0.0788257	0.0915129	0.861361	0.389039	1
1956	MSTRG.11969	13.3482	-0.241104	0.871158	-0.276762	0.781963	1
1957	MSTRG.1197	17794.6	0.0126797	0.0681807	0.185971	0.852467	1
1958	MSTRG.11970	4601.33	0.0436942	0.0893922	0.488792	0.624989	1
1959	MSTRG.11971	66.4265	-0.171505	0.394637	-0.43459	0.66386	1
1960	MSTRG.11973	625.635	0.121131	0.145142	0.834566	0.403962	1
1961	MSTRG.11974	22.6385	-0.135457	0.667321	-0.202986	0.839146	1
1962	MSTRG.11975	267.049	-0.133703	0.217111	-0.615827	0.538009	1
1963	MSTRG.11976	4991.07	-0.0612134	0.0796421	-0.768607	0.442127	1
1964	MSTRG.11977	23.5684	-0.509779	0.639806	-0.796772	0.425584	1
1965	MSTRG.11978	2382.82	0.0390321	0.0954018	0.409134	0.682442	1
1966	MSTRG.11979	161.857	0.218373	0.279456	0.781423	0.434554	1
1967	MSTRG.1198	545.322	0.0632204	0.144088	0.438762	0.660834	1
1968	MSTRG.11980	897.463	0.0929822	0.148115	0.627769	0.530155	1
1969	MSTRG.11981	3578.06	-0.264106	0.112046	-2.35712	0.0184171	1
1970	MSTRG.11982	703.242	0.0137892	0.135485	0.101776	0.918934	1
1971	MSTRG.11983	3024.28	-0.0845696	0.0929066	-0.910265	0.362683	1
1972	MSTRG.11985	17305.8	0.0578669	0.0651664	0.887987	0.374548	1
1973	MSTRG.11986	33.2966	-0.170928	0.530485	-0.322211	0.747293	1
1974	MSTRG.11987	13587.5	0.00214766	0.0768389	0.0279501	0.977702	1
1975	MSTRG.11989	38.4654	-0.124198	0.491713	-0.252583	0.80059	1
1976	MSTRG.1199	26677.9	0.0198045	0.0654309	0.302678	0.762136	1
1977	MSTRG.11990	514.214	-0.25629	0.145158	-1.76559	0.0774644	1
1978	MSTRG.11992	654.895	-0.227545	0.148778	-1.52942	0.12616	1
1979	MSTRG.11993	250.016	-0.186342	0.197088	-0.945475	0.344417	1
1980	MSTRG.11994	6906.14	-0.0281817	0.0787439	-0.357891	0.720425	1
1981	MSTRG.11995	503.369	-0.00173978	0.153937	-0.0113019	0.990983	1
1982	MSTRG.11996	570.692	0.0760159	0.149133	0.509718	0.610249	1
1983	MSTRG.11997	850.772	0.0432962	0.126984	0.340957	0.733136	1
1984	MSTRG.11998	132.634	-0.63299	0.299219	-2.11548	0.0343894	1
1985	MSTRG.11999	4171.68	0.110959	0.0864145	1.28403	0.199132	1
1986	MSTRG.120	658.469	-0.0923115	0.130986	-0.704742	0.480971	1
1987	MSTRG.1200	420.537	-0.0804768	0.165092	-0.487467	0.625927	1
1988	MSTRG.12000	9.33962	-0.218357	0.949943	-0.229863	0.818198	1
1989	MSTRG.12002	175.906	-0.183579	0.250699	-0.732272	0.464003	1
1990	MSTRG.12003	34.3849	-0.570279	0.538373	-1.05926	0.28948	1
1991	MSTRG.12004	1411.5	0.0554408	0.106385	0.521134	0.602274	1
1992	MSTRG.12005	1002.67	0.0783109	0.123495	0.634124	0.526	1
1993	MSTRG.12006	64.4368	-0.337056	0.385404	-0.874552	0.381818	1
1994	MSTRG.12008	29892.7	0.0392335	0.0962133	0.407776	0.683438	1
1995	MSTRG.12009	208.563	0.0331939	0.21448	0.154765	0.877007	1
1996	MSTRG.1201	26.7524	-0.323571	0.581133	-0.556794	0.577668	1
1997	MSTRG.12010	14248.1	0.138762	0.0906097	1.53143	0.125664	1
1998	MSTRG.12011	1614.99	-0.168895	0.123383	-1.36886	0.171042	1
[truncated: 26,004 more rows]

## Sheet: pax258-1(RNAi)
	Unnamed: 0	baseMean	log2FoldChange	lfcSE	stat	pvalue	padj
0	MSTRG.12760	24870.1	-4.50012	0.116833	-38.5177	0	0
1	MSTRG.19491	687.041	-3.2035	0.0856699	-37.3935	4.97836e-306	4.64257e-302
2	MSTRG.21271	1754.97	-4.18112	0.111863	-37.377	9.22873e-306	5.7375e-302
3	MSTRG.6295	645.353	-4.40807	0.125246	-35.1953	2.35964e-271	1.10024e-267
4	MSTRG.13532	6071.18	-2.13589	0.0706813	-30.2186	1.34972e-200	5.03474e-197
5	MSTRG.14750	1292.24	-7.28774	0.24587	-29.6406	4.48853e-193	1.39526e-189
6	MSTRG.14675	553.27	-5.39931	0.189609	-28.476	2.32322e-178	6.19006e-175
7	MSTRG.5263	709.634	-2.68144	0.096522	-27.7806	7.4365e-170	1.73373e-166
8	MSTRG.9984	574.962	-3.76159	0.141484	-26.5867	9.66904e-156	2.00375e-152
9	MSTRG.3753	433.217	-3.67205	0.13986	-26.2553	6.21703e-152	1.15954e-148
10	MSTRG.3323	3432.41	-2.78421	0.106852	-26.0566	1.13134e-149	1.91824e-146
11	MSTRG.2051	1366.24	-1.4356	0.0551212	-26.0445	1.552e-149	2.41219e-146
12	MSTRG.11612	1432.23	-4.72246	0.183844	-25.6874	1.61768e-145	2.32087e-142
13	MSTRG.11769	27535.6	-1.62041	0.0631488	-25.6603	3.24621e-145	4.32464e-142
14	MSTRG.2111	446.993	-2.20762	0.0866902	-25.4656	4.74312e-143	5.89759e-140
15	MSTRG.15423	433.571	-4.71431	0.185455	-25.4202	1.50716e-142	1.75687e-139
16	MSTRG.22030	1449.59	-2.07897	0.0825447	-25.186	5.70669e-140	6.26091e-137
17	MSTRG.11458	18037.5	-1.53829	0.0614594	-25.0293	2.93332e-138	3.03941e-135
18	MSTRG.3960	1170.7	-1.23928	0.0504375	-24.5706	2.60548e-133	2.55762e-130
19	MSTRG.13590	3106.94	-2.64804	0.108065	-24.5041	1.33435e-132	1.24435e-129
20	MSTRG.15305	758.972	-3.04939	0.125813	-24.2375	8.96746e-130	7.96439e-127
21	MSTRG.492	365.989	-3.54858	0.146552	-24.2138	1.59204e-129	1.34969e-126
22	MSTRG.23254	952.209	-1.84269	0.0765952	-24.0575	6.96686e-128	5.64952e-125
23	MSTRG.366	379.481	-4.25658	0.177773	-23.9439	1.06903e-126	8.30772e-124
24	MSTRG.1532	203.823	-3.09018	0.130832	-23.6194	2.43795e-123	1.81881e-120
25	MSTRG.3508	3150.39	-1.18453	0.054428	-21.7632	5.18203e-105	3.71731e-102
26	MSTRG.13015	974.247	-1.87937	0.0864716	-21.734	9.78987e-105	6.76263e-102
27	MSTRG.21274	299.442	-3.22311	0.150074	-21.4768	2.56521e-102	1.7087e-99
28	MSTRG.16068	182.974	-4.13685	0.194482	-21.2712	2.09957e-100	1.35031e-97
29	MSTRG.22117	21842.8	-1.32829	0.0624824	-21.2586	2.74278e-100	1.70519e-97
30	MSTRG.4896	554.439	-3.89258	0.183218	-21.2456	3.62307e-100	2.1798e-97
31	MSTRG.4512	1107.49	-0.946239	0.0449647	-21.044	2.59407e-98	1.51194e-95
32	MSTRG.8133	915.207	-6.85857	0.325944	-21.0422	2.69702e-98	1.52431e-95
33	MSTRG.16184	389.749	-1.77642	0.0857884	-20.7069	2.99896e-95	1.64511e-92
34	MSTRG.8186	1137.44	-6.85051	0.334999	-20.4493	6.09183e-93	3.24625e-90
35	MSTRG.1662	227.783	-5.22982	0.257714	-20.2931	1.47977e-91	7.66643e-89
36	MSTRG.5384	211.06	-4.45532	0.2201	-20.2422	4.16119e-91	2.09758e-88
37	MSTRG.21276	252.124	-5.64577	0.282129	-20.0113	4.39094e-89	2.15514e-86
38	MSTRG.21277	321.82	-4.78393	0.241414	-19.8163	2.15529e-87	1.03073e-84
39	MSTRG.15306	778.992	-4.85847	0.245873	-19.76	6.57667e-87	3.06654e-84
40	MSTRG.8451	174.537	-2.94545	0.149206	-19.7408	9.6258e-87	4.3788e-84
41	MSTRG.20635	230.716	-2.13622	0.109102	-19.58	2.28838e-85	1.0162e-82
42	MSTRG.8639	265.577	-1.90628	0.0986536	-19.3229	3.44483e-83	1.49418e-80
43	MSTRG.21336	464.342	-2.10673	0.110018	-19.149	9.87399e-82	4.18545e-79
44	MSTRG.19254	206.434	-3.49098	0.183126	-19.0633	5.09403e-81	2.11131e-78
45	MSTRG.8188	732.114	-7.05886	0.373048	-18.9221	7.49694e-80	3.03968e-77
46	MSTRG.637	2477.19	-1.16647	0.0616954	-18.9069	1.00111e-79	3.97271e-77
47	MSTRG.1828	3810.7	-0.865584	0.0463309	-18.6826	6.85526e-78	2.6637e-75
48	MSTRG.13500	658.957	-1.20538	0.0646237	-18.6522	1.21105e-77	4.60966e-75
49	MSTRG.13434	1808.48	-1.13039	0.0608673	-18.5714	5.48066e-77	2.0444e-74
50	MSTRG.8132	641.11	-6.83729	0.372492	-18.3555	2.98198e-75	1.09053e-72
51	MSTRG.7621	193.685	-5.65275	0.311809	-18.1289	1.88637e-73	6.7659e-71
52	MSTRG.473	141.787	-2.89881	0.160435	-18.0684	5.65776e-73	1.991e-70
53	MSTRG.7218	328.526	-3.82736	0.21528	-17.7785	1.03763e-70	3.58387e-68
54	MSTRG.14122	351.583	-1.51744	0.0871928	-17.4033	7.78602e-68	2.64031e-65
55	MSTRG.9879	3632.39	0.575647	0.0331549	17.3623	1.5912e-67	5.29956e-65
56	MSTRG.10057	1881.77	-1.94478	0.114251	-17.022	5.64045e-65	1.84561e-62
57	MSTRG.17083	906.53	-1.08839	0.0644396	-16.89	5.32702e-64	1.713e-61
58	MSTRG.18976	173.043	-5.17969	0.310555	-16.6788	1.86919e-62	5.90886e-60
59	MSTRG.3652	840.628	-1.55591	0.093866	-16.5759	1.04062e-61	3.23478e-59
60	MSTRG.21180	436.266	-2.31115	0.139812	-16.5304	2.21613e-61	6.77591e-59
61	MSTRG.1793	234.034	-2.47488	0.149868	-16.5137	2.9249e-61	8.79877e-59
62	MSTRG.19265	247.75	-2.31971	0.141591	-16.3832	2.52064e-60	7.4623e-58
63	MSTRG.8036	2194.5	-1.35313	0.082769	-16.3483	4.47547e-60	1.30425e-57
64	MSTRG.3867	818.661	-0.930529	0.0571118	-16.2931	1.10442e-59	3.16901e-57
65	MSTRG.16739	765.048	-1.39793	0.0858615	-16.2812	1.34227e-59	3.79313e-57
66	MSTRG.1549	2386.15	-0.692231	0.0425825	-16.2562	2.0176e-59	5.61647e-57
67	MSTRG.2442	278.666	-2.22778	0.1382	-16.12	1.84727e-58	5.06669e-56
68	MSTRG.13528	3620.75	-1.83475	0.113836	-16.1175	1.92138e-58	5.19358e-56
69	MSTRG.20129	2450.36	-0.651578	0.0406008	-16.0484	5.86559e-58	1.56284e-55
70	MSTRG.10339	113.667	-4.51669	0.283469	-15.9336	3.70132e-57	9.72299e-55
71	MSTRG.14617	1622.19	-0.672648	0.0423837	-15.8704	1.01565e-56	2.63097e-54
72	MSTRG.22811	156.269	-2.61736	0.166962	-15.6764	2.19502e-55	5.60812e-53
73	MSTRG.17105	1148.79	-0.898286	0.0574494	-15.6361	4.13149e-55	1.0413e-52
74	MSTRG.10725	4319.69	-0.698528	0.0447437	-15.6118	6.05459e-55	1.50566e-52
75	MSTRG.19559	183.008	-3.19343	0.205141	-15.567	1.21964e-54	2.9931e-52
76	MSTRG.22758	936.194	-0.946238	0.0608628	-15.5471	1.66595e-54	4.03529e-52
77	MSTRG.15672	161.255	-6.4105	0.415773	-15.4182	1.23405e-53	2.95081e-51
78	MSTRG.9894	824.139	-5.81757	0.379975	-15.3104	6.51759e-53	1.53873e-50
79	MSTRG.5476	346.183	-1.26859	0.0829214	-15.2987	7.79823e-53	1.81806e-50
80	MSTRG.7231	149.625	-2.21058	0.144747	-15.272	1.17579e-52	2.70738e-50
81	MSTRG.10056	132.399	-3.00589	0.197181	-15.2444	1.7949e-52	4.08253e-50
82	MSTRG.19485	128.438	-2.68531	0.176305	-15.2311	2.20029e-52	4.94429e-50
83	MSTRG.2439	150.184	-5.35296	0.353131	-15.1586	6.64813e-52	1.47612e-49
84	MSTRG.14556	225.316	-2.41601	0.159741	-15.1245	1.11668e-51	2.45025e-49
85	MSTRG.13832	105.699	-5.21199	0.345935	-15.0664	2.69401e-51	5.84256e-49
86	MSTRG.8801	284.286	-1.40272	0.0934867	-15.0045	6.86159e-51	1.47098e-48
87	MSTRG.18063	187.991	-1.81442	0.121108	-14.9819	9.64575e-51	2.04435e-48
88	MSTRG.15385	815.111	-1.60938	0.107654	-14.9496	1.56753e-50	3.24845e-48
89	MSTRG.8395	142.03	-2.84114	0.190047	-14.9497	1.56498e-50	3.24845e-48
90	MSTRG.3842	1122.89	-1.14473	0.0767102	-14.9228	2.34366e-50	4.80348e-48
91	MSTRG.7709	99.7217	-3.09606	0.208196	-14.8709	5.09567e-50	1.03304e-47
92	MSTRG.15874	114.789	-4.4462	0.301253	-14.759	2.69173e-49	5.39823e-47
93	MSTRG.2294	260.634	-2.99275	0.202869	-14.7522	2.97922e-49	5.91122e-47
94	MSTRG.9091	1741.77	-1.11693	0.0764102	-14.6175	2.172e-48	4.26421e-46
95	MSTRG.17598	471.006	-1.18938	0.0815779	-14.5797	3.78126e-48	7.34629e-46
96	MSTRG.19926	529.569	-1.11458	0.0767047	-14.5308	7.73133e-48	1.48657e-45
97	MSTRG.20141	2246.92	-0.573206	0.0396995	-14.4386	2.95618e-47	5.62609e-45
98	MSTRG.227	826.171	-1.46066	0.101652	-14.3693	8.06913e-47	1.52018e-44
99	MSTRG.4338	1327.72	-1.06966	0.0747643	-14.307	1.97733e-46	3.68792e-44
100	MSTRG.22288	1047.12	-1.17631	0.0833654	-14.1102	3.28458e-45	6.06542e-43
101	MSTRG.10521	572.255	-0.95179	0.0675754	-14.0849	4.70603e-45	8.60512e-43
102	MSTRG.7570	379.162	-1.39846	0.099407	-14.0681	5.96762e-45	1.0806e-42
103	MSTRG.20797	96.3875	-3.1042	0.221061	-14.0423	8.58803e-45	1.54015e-42
104	MSTRG.9468	585.172	-1.1165	0.0795929	-14.0276	1.05631e-44	1.87631e-42
105	MSTRG.14767	138.816	-6.03831	0.431228	-14.0026	1.50297e-44	2.64452e-42
106	MSTRG.15551	508.685	-1.71952	0.123407	-13.9337	3.95278e-44	6.89004e-42
107	MSTRG.13016	224.089	-1.75217	0.125848	-13.9229	4.60055e-44	7.9449e-42
108	MSTRG.1791	204.158	-2.13435	0.155344	-13.7396	5.8839e-43	1.0068e-40
109	MSTRG.18621	929.228	-0.914513	0.0667804	-13.6943	1.09739e-42	1.86068e-40
110	MSTRG.10910	621.193	0.956868	0.0701954	13.6315	2.6023e-42	4.37257e-40
111	MSTRG.6370	144.917	-4.3312	0.318521	-13.5978	4.12563e-42	6.87027e-40
112	MSTRG.10941	971.723	-1.3809	0.101989	-13.5396	9.12412e-42	1.50596e-39
113	MSTRG.21959	163.481	-1.85244	0.136952	-13.5262	1.09549e-41	1.79229e-39
114	MSTRG.14084	756.927	-1.16526	0.0865164	-13.4687	2.39166e-41	3.87886e-39
115	MSTRG.8647	816.457	-1.41619	0.105407	-13.4354	3.74896e-41	6.02775e-39
116	MSTRG.18807	3023.63	-0.914406	0.0681073	-13.426	4.26015e-41	6.79111e-39
117	MSTRG.15023	658.619	-1.32043	0.0985526	-13.3982	6.19092e-41	9.78533e-39
118	MSTRG.19310	316.676	-1.27661	0.0954597	-13.3733	8.66145e-41	1.35752e-38
119	MSTRG.13526	98.9145	-4.56841	0.341656	-13.3714	8.89082e-41	1.38186e-38
120	MSTRG.1733	598.143	-1.1132	0.0838047	-13.2833	2.89367e-40	4.46031e-38
121	MSTRG.8038	2408.23	-1.19243	0.0898748	-13.2677	3.56568e-40	5.45111e-38
122	MSTRG.601	77.0153	-3.32265	0.250934	-13.2411	5.07718e-40	7.69874e-38
123	MSTRG.3062	376.137	-1.25789	0.0951319	-13.2226	6.50193e-40	9.77964e-38
124	MSTRG.12045	2610.27	-0.486814	0.0369687	-13.1683	1.33604e-39	1.99348e-37
125	MSTRG.21685	85.7329	-3.13265	0.238767	-13.1201	2.52537e-39	3.73815e-37
126	MSTRG.12105	507.417	-1.4956	0.114229	-13.093	3.61297e-39	5.30595e-37
127	MSTRG.5022	486.49	-0.771064	0.0590787	-13.0515	6.23342e-39	9.08277e-37
128	MSTRG.11494	1000.56	-1.08299	0.083762	-12.9293	3.07527e-38	4.44626e-36
129	MSTRG.13262	273.715	-1.2474	0.0969221	-12.8701	6.63083e-38	9.51319e-36
130	MSTRG.9094	1727.88	-1.19379	0.0943606	-12.6514	1.09889e-36	1.56453e-34
131	MSTRG.3391	701.689	-0.955454	0.0756089	-12.6368	1.32335e-36	1.86984e-34
132	MSTRG.4341	33.9695	3.288	0.260692	12.6126	1.79935e-36	2.52329e-34
133	MSTRG.3740	128.701	-1.67748	0.133366	-12.578	2.78918e-36	3.88217e-34
134	MSTRG.8216	2120.85	-3.33456	0.266732	-12.5015	7.32364e-36	1.0118e-33
135	MSTRG.16433	5450.24	-0.626647	0.0502176	-12.4786	9.76362e-36	1.33898e-33
136	MSTRG.17790	649.048	-0.755639	0.0610493	-12.3775	3.45895e-35	4.70897e-33
137	MSTRG.18461	3239.15	-1.24399	0.100738	-12.3488	4.94281e-35	6.68032e-33
138	MSTRG.22271	2131.52	-1.1116	0.0908405	-12.2368	1.97648e-34	2.65204e-32
139	MSTRG.12561	274.31	-1.19267	0.0982655	-12.1372	6.71006e-34	8.93924e-32
140	MSTRG.7176	6482.59	-1.00233	0.0828181	-12.1028	1.0205e-33	1.34988e-31
141	MSTRG.479	142.252	-1.78307	0.147374	-12.099	1.06924e-33	1.40439e-31
142	MSTRG.13350	16.0333	45.28	3.75316	12.0645	1.62632e-33	2.12116e-31
143	MSTRG.17505	125.438	-1.73708	0.144067	-12.0574	1.77295e-33	2.29634e-31
144	MSTRG.2419	1664.87	-1.33556	0.111132	-12.0178	2.86515e-33	3.68537e-31
145	MSTRG.19351	8237.18	-0.983399	0.0819875	-11.9945	3.79714e-33	4.85072e-31
146	MSTRG.14937	1639.65	-0.634056	0.0531262	-11.9349	7.78448e-33	9.87676e-31
147	MSTRG.8153	697.85	-1.01149	0.0847651	-11.9329	7.97808e-33	1.0054e-30
148	MSTRG.13493	178.602	-3.28061	0.275188	-11.9213	9.16266e-33	1.14693e-30
149	MSTRG.18623	108.852	-3.28315	0.276011	-11.895	1.2564e-32	1.56221e-30
150	MSTRG.12109	620.051	-1.31747	0.111111	-11.8572	1.97478e-32	2.43918e-30
151	MSTRG.9090	169.874	-1.86624	0.157991	-11.8123	3.37124e-32	4.13664e-30
152	MSTRG.23393	4163.65	-0.423449	0.0362048	-11.6959	1.33708e-31	1.62993e-29
153	MSTRG.4877	146.014	-2.02523	0.173487	-11.6737	1.73749e-31	2.10428e-29
154	MSTRG.13475	280.96	-1.15542	0.099293	-11.6364	2.69016e-31	3.23704e-29
155	MSTRG.5395	754.535	-1.0618	0.0912792	-11.6324	2.81955e-31	3.37098e-29
156	MSTRG.23323	1843.53	-0.549984	0.0473027	-11.6269	3.0077e-31	3.57303e-29
157	MSTRG.1798	137.444	-7.97433	0.687138	-11.6051	3.88029e-31	4.58046e-29
158	MSTRG.2321	2873.47	0.479702	0.0414007	11.5868	4.80774e-31	5.63957e-29
159	MSTRG.5778	121.454	-1.57391	0.136097	-11.5646	6.22768e-31	7.25953e-29
160	MSTRG.13232	4300.94	-0.902886	0.0785155	-11.4995	1.32746e-30	1.5378e-28
161	MSTRG.15402	87.7641	-5.51138	0.479756	-11.4879	1.51785e-30	1.74749e-28
162	MSTRG.2241	3882	-0.694151	0.0605442	-11.4652	1.97308e-30	2.25766e-28
163	MSTRG.22560	2377.84	-1.11881	0.0982274	-11.39	4.6884e-30	5.33191e-28
164	MSTRG.15154	133.322	-1.43164	0.125999	-11.3623	6.44352e-30	7.28352e-28
165	MSTRG.14503	1653.32	-0.708831	0.0627177	-11.3019	1.28369e-29	1.4423e-27
166	MSTRG.14436	133.234	-1.77169	0.157016	-11.2835	1.58315e-29	1.76811e-27
167	MSTRG.22125	90.6943	-6.72114	0.595763	-11.2816	1.61811e-29	1.79639e-27
168	MSTRG.5381	412.747	-0.927446	0.082587	-11.2299	2.90729e-29	3.20851e-27
169	MSTRG.8069	555.919	-0.706438	0.0630916	-11.197	4.21708e-29	4.62663e-27
170	MSTRG.6716	61.2567	-2.42407	0.216782	-11.1821	4.99185e-29	5.44462e-27
171	MSTRG.23595	6549.06	-0.541462	0.0486051	-11.14	8.009e-29	8.68464e-27
172	MSTRG.20491	4290.01	-0.555937	0.050383	-11.0342	2.61311e-28	2.81717e-26
173	MSTRG.15396	98.1588	1.45647	0.1321	11.0255	2.87833e-28	3.08528e-26
174	MSTRG.17363	102.812	-5.33137	0.483636	-11.0235	2.94337e-28	3.13696e-26
175	MSTRG.2511	189.609	-1.20041	0.109083	-11.0046	3.63012e-28	3.8469e-26
176	MSTRG.14355	148.715	-1.24092	0.113443	-10.9387	7.52327e-28	7.92749e-26
177	MSTRG.12672	130.987	-1.5854	0.145531	-10.8938	1.23316e-27	1.29211e-25
178	MSTRG.6537	1720.64	-0.910034	0.0837984	-10.8598	1.79146e-27	1.86662e-25
179	MSTRG.1147	68.2497	-2.05379	0.190557	-10.7778	4.38211e-27	4.54059e-25
180	MSTRG.20632	68.6335	-5.05674	0.469514	-10.7702	4.76115e-27	4.90609e-25
181	MSTRG.19475	61.6111	-2.8618	0.266295	-10.7467	6.14061e-27	6.29278e-25
182	MSTRG.15886	66.7926	-5.28216	0.493232	-10.7093	9.20609e-27	9.38267e-25
183	MSTRG.12795	399.085	-0.964008	0.0907564	-10.6219	2.35636e-26	2.38851e-24
184	MSTRG.5289	1844.34	-0.582458	0.0548469	-10.6197	2.41319e-26	2.43289e-24
185	MSTRG.13492	176.011	-5.64543	0.531731	-10.6171	2.48194e-26	2.48874e-24
186	MSTRG.7572	543.841	-0.999374	0.0941357	-10.6163	2.50259e-26	2.49603e-24
187	MSTRG.17613	829.863	-0.711941	0.0673854	-10.5652	4.3202e-26	4.28596e-24
188	MSTRG.3687	317.967	0.819447	0.0775901	10.5612	4.50717e-26	4.44779e-24
189	MSTRG.6651	72.0565	-2.38251	0.227709	-10.4629	1.27815e-25	1.25467e-23
190	MSTRG.21151	93.4886	-1.57657	0.15117	-10.4292	1.82485e-25	1.78196e-23
191	MSTRG.16971	884.781	-1.06619	0.10227	-10.4253	1.90154e-25	1.84716e-23
192	MSTRG.14751	766.127	-0.796249	0.0764507	-10.4152	2.11363e-25	2.04255e-23
193	MSTRG.8735	472.829	-0.833989	0.0801137	-10.4101	2.23073e-25	2.1446e-23
194	MSTRG.16152	988.539	-0.944842	0.0908365	-10.4016	2.43871e-25	2.33253e-23
195	MSTRG.869	720.596	-0.624107	0.0600218	-10.398	2.53164e-25	2.40906e-23
196	MSTRG.17606	369.14	-0.997851	0.0959884	-10.3955	2.59832e-25	2.45996e-23
197	MSTRG.15360	5970.95	-0.798015	0.0771353	-10.3457	4.3789e-25	4.12479e-23
198	MSTRG.8212	2386.7	-2.87186	0.277727	-10.3406	4.61676e-25	4.327e-23
199	MSTRG.8089	92.8521	-1.62532	0.157513	-10.3187	5.80241e-25	5.41104e-23
200	MSTRG.10706	210.277	-1.25542	0.121786	-10.3085	6.45323e-25	5.98802e-23
201	MSTRG.16615	377.738	-1.08109	0.105025	-10.2937	7.52562e-25	6.94854e-23
202	MSTRG.5446	1149.74	-0.709498	0.0690113	-10.2809	8.59268e-25	7.89468e-23
203	MSTRG.16059	484.651	0.637621	0.0621603	10.2577	1.093e-24	9.99288e-23
204	MSTRG.13531	13753.4	-0.809743	0.079022	-10.2471	1.22002e-24	1.10998e-22
205	MSTRG.5394	405.892	-1.12622	0.111028	-10.1435	3.5407e-24	3.20571e-22
206	MSTRG.3865	2318.33	-0.527454	0.0520895	-10.1259	4.23973e-24	3.82006e-22
207	MSTRG.19255	37.1386	-4.45373	0.440326	-10.1146	4.75931e-24	4.26759e-22
208	MSTRG.11014	464.729	-1.05275	0.104443	-10.0797	6.79433e-24	6.06321e-22
209	MSTRG.804	133.463	-1.33977	0.133242	-10.0552	8.71234e-24	7.7378e-22
210	MSTRG.13021	8364.47	-1.11491	0.11121	-10.0253	1.18005e-23	1.04308e-21
211	MSTRG.10012	58.0687	-2.79384	0.279981	-9.97866	1.88998e-23	1.66274e-21
212	MSTRG.18549	74.6449	-2.1272	0.213753	-9.95164	2.48054e-23	2.17204e-21
213	MSTRG.22802	11383	-0.491816	0.0495284	-9.92998	3.08308e-23	2.68704e-21
214	MSTRG.9829	4090.95	-0.620386	0.0625569	-9.91715	3.50633e-23	3.0417e-21
215	MSTRG.11805	465.684	-0.949387	0.0958123	-9.90882	3.81122e-23	3.27834e-21
216	MSTRG.13898	917.727	-0.626384	0.0632153	-9.90874	3.81427e-23	3.27834e-21
217	MSTRG.21605	1138.27	-0.511649	0.051773	-9.88254	4.95603e-23	4.24013e-21
218	MSTRG.14576	1106.19	0.496626	0.0503262	9.86816	5.72051e-23	4.87184e-21
219	MSTRG.11153	109.328	-1.52845	0.155269	-9.84388	7.28452e-23	6.17562e-21
220	MSTRG.23194	315.043	-0.985354	0.100379	-9.81629	9.58027e-23	8.08514e-21
221	MSTRG.2319	37.9663	-4.30465	0.439852	-9.78659	1.28564e-22	1.08011e-20
222	MSTRG.22484	292.275	-0.878766	0.0898094	-9.78479	1.30873e-22	1.09458e-20
223	MSTRG.18926	367.5	-0.82599	0.0846569	-9.75692	1.72311e-22	1.43472e-20
224	MSTRG.13452	153.561	-1.16444	0.120267	-9.68215	3.59087e-22	2.97659e-20
225	MSTRG.17118	133.474	-1.33811	0.138967	-9.629	6.03114e-22	4.97729e-20
226	MSTRG.9562	86.5519	1.51371	0.157221	9.62795	6.09348e-22	5.00658e-20
227	MSTRG.11324	255.124	-0.810111	0.0846807	-9.56665	1.10421e-21	8.99855e-20
228	MSTRG.11617	223.731	-0.958612	0.100204	-9.56659	1.10486e-21	8.99855e-20
229	MSTRG.9452	2055.46	-1.03613	0.108594	-9.54134	1.40998e-21	1.14337e-19
230	MSTRG.5048	813.984	-0.67673	0.0711936	-9.50549	1.99109e-21	1.60761e-19
231	MSTRG.14256	282.796	-0.842418	0.0887877	-9.488	2.35513e-21	1.89334e-19
232	MSTRG.10781	2694.18	-0.572005	0.0603642	-9.4759	2.64467e-21	2.11699e-19
233	MSTRG.13249	42.8642	-2.40681	0.254303	-9.46436	2.95364e-21	2.35421e-19
234	MSTRG.697	59.1196	-2.90428	0.307289	-9.45128	3.34711e-21	2.65647e-19
235	MSTRG.6496	1169.99	-0.687615	0.0727648	-9.44983	3.39367e-21	2.68201e-19
236	MSTRG.21203	79.8522	2.15549	0.22855	9.43119	4.05455e-21	3.19078e-19
237	MSTRG.19483	43.4167	-2.57532	0.273248	-9.42485	4.30724e-21	3.37539e-19
238	MSTRG.15657	135.75	-1.26919	0.134779	-9.41677	4.65162e-21	3.63001e-19
239	MSTRG.16727	617.544	-3.09376	0.328623	-9.41434	4.76084e-21	3.69976e-19
240	MSTRG.3181	1060.76	-1.04823	0.111473	-9.40343	5.28112e-21	4.08706e-19
241	MSTRG.5040	374.826	0.800795	0.0852377	9.39485	5.7302e-21	4.41628e-19
242	MSTRG.13233	337.663	-1.71673	0.18391	-9.33462	1.01351e-20	7.77903e-19
243	MSTRG.4223	361.83	-0.985337	0.105632	-9.32802	1.07871e-20	8.2455e-19
244	MSTRG.3882	4064.4	-0.397799	0.0427884	-9.2969	1.44596e-20	1.10076e-18
245	MSTRG.22327	166.698	-1.1874	0.127901	-9.28375	1.63614e-20	1.24047e-18
246	MSTRG.18938	5493.68	-0.334108	0.0361281	-9.24787	2.29015e-20	1.72929e-18
247	MSTRG.7375	405.259	-0.763699	0.0826528	-9.23985	2.46853e-20	1.85647e-18
248	MSTRG.1262	2365.41	0.431673	0.0467478	9.23409	2.60498e-20	1.95122e-18
249	MSTRG.801	110.159	-1.60531	0.17445	-9.20211	3.50973e-20	2.6184e-18
250	MSTRG.13723	927.524	-0.838707	0.0911598	-9.20041	3.56595e-20	2.64974e-18
251	MSTRG.1797	79.0737	-7.69234	0.83819	-9.17732	4.41941e-20	3.27089e-18
252	MSTRG.6800	537.329	-0.768999	0.0838923	-9.1665	4.88618e-20	3.60206e-18
253	MSTRG.11163	781.847	-0.488951	0.0535007	-9.13915	6.29432e-20	4.62186e-18
254	MSTRG.15960	1213.87	-0.666875	0.0731567	-9.11571	7.81603e-20	5.71673e-18
255	MSTRG.12359	41.7338	-2.4873	0.273192	-9.10459	8.6589e-20	6.30848e-18
256	MSTRG.17933	2871.29	-0.680947	0.0748355	-9.09925	9.09568e-20	6.60091e-18
257	MSTRG.15896	6011.46	-0.899597	0.0995136	-9.03994	1.56751e-19	1.13316e-17
258	MSTRG.19273	548.213	0.712057	0.0794128	8.96653	3.06007e-19	2.20361e-17
259	MSTRG.8648	1840.66	-0.798229	0.0897581	-8.89312	5.94178e-19	4.26231e-17
260	MSTRG.1957	1290.49	-0.8199	0.0922787	-8.88504	6.3896e-19	4.56599e-17
261	MSTRG.21377	574.734	-0.649706	0.0736688	-8.81927	1.15206e-18	8.20116e-17
262	MSTRG.3781	7051.33	-0.317543	0.0360984	-8.79659	1.4104e-18	1.0002e-16
263	MSTRG.13604	18991.7	-0.61481	0.0703777	-8.73587	2.41786e-18	1.70816e-16
264	MSTRG.19349	107.78	-1.48917	0.170771	-8.72023	2.77637e-18	1.95404e-16
265	MSTRG.13253	1034.33	-0.533675	0.0613477	-8.69919	3.34275e-18	2.34382e-16
266	MSTRG.5094	284.868	-0.870078	0.100057	-8.69583	3.44317e-18	2.40519e-16
267	MSTRG.22759	3161.07	-0.428917	0.0494432	-8.67494	4.13779e-18	2.87962e-16
268	MSTRG.11840	98.4472	-1.66825	0.192588	-8.66229	4.62381e-18	3.2059e-16
269	MSTRG.6967	3458.87	-0.535336	0.0622596	-8.59846	8.07935e-18	5.58104e-16
270	MSTRG.22272	222.648	0.744072	0.0874386	8.50966	1.74446e-17	1.20059e-15
271	MSTRG.12692	846.745	-0.605587	0.071185	-8.50723	1.78141e-17	1.22151e-15
272	MSTRG.12085	34.6312	-3.99744	0.472112	-8.46716	2.51454e-17	1.7179e-15
273	MSTRG.18462	1316.22	-0.904833	0.107076	-8.45034	2.9046e-17	1.97714e-15
274	MSTRG.2822	32.3395	-3.03049	0.358854	-8.4449	3.04295e-17	2.06378e-15
275	MSTRG.21999	57.501	-6.30792	0.747016	-8.44416	3.0625e-17	2.06952e-15
276	MSTRG.22657	488.593	-0.738201	0.0876657	-8.42063	3.74472e-17	2.5214e-15
277	MSTRG.13451	789.131	-0.806016	0.0958544	-8.40875	4.14397e-17	2.78019e-15
278	MSTRG.9087	265.559	-1.07063	0.127872	-8.37271	5.63087e-17	3.76421e-15
279	MSTRG.17193	25.2229	-2.75999	0.329948	-8.36492	6.0156e-17	4.00703e-15
280	MSTRG.4619	725.118	-2.03258	0.243044	-8.36304	6.11223e-17	4.05691e-15
281	MSTRG.18796	476.044	-0.685543	0.082073	-8.35284	6.66388e-17	4.40738e-15
282	MSTRG.4295	688.713	-0.586311	0.070508	-8.31553	9.13399e-17	6.01972e-15
283	MSTRG.3267	5886.68	0.419909	0.0505407	8.30834	9.70504e-17	6.37354e-15
284	MSTRG.11027	744.405	-0.597367	0.0719759	-8.29953	1.0452e-16	6.84002e-15
285	MSTRG.772	1329.83	-0.411779	0.0496772	-8.28909	1.14117e-16	7.44194e-15
286	MSTRG.21981	1152.03	-0.443626	0.0535396	-8.28594	1.17179e-16	7.61499e-15
287	MSTRG.9903	6373.77	-0.801735	0.0969157	-8.2725	1.31181e-16	8.49536e-15
288	MSTRG.4662	4420.03	-0.399007	0.048272	-8.2658	1.3876e-16	8.95505e-15
289	MSTRG.8393	45.8357	-1.874	0.226847	-8.26109	1.44352e-16	9.28384e-15
290	MSTRG.8554	111.17	-1.20129	0.145691	-8.24547	1.64509e-16	1.05438e-14
291	MSTRG.2007	98.7776	-1.16561	0.141809	-8.2196	2.04182e-16	1.30417e-14
292	MSTRG.3134	4997.55	-0.465137	0.0566039	-8.21741	2.07947e-16	1.31919e-14
293	MSTRG.8219	6980.43	-2.08532	0.253762	-8.21762	2.07579e-16	1.31919e-14
294	MSTRG.4011	460.481	-0.684539	0.0837543	-8.17318	3.00363e-16	1.899e-14
295	MSTRG.22035	1948.21	-0.402375	0.0493018	-8.16146	3.31009e-16	2.08569e-14
296	MSTRG.18097	2026.94	-0.362953	0.0444841	-8.15915	3.37379e-16	2.11867e-14
297	MSTRG.17885	179.443	-0.923656	0.113578	-8.13234	4.21082e-16	2.63544e-14
298	MSTRG.15071	3213.61	-0.333597	0.0410354	-8.1295	4.3108e-16	2.68899e-14
299	MSTRG.22799	191.497	-0.814774	0.100318	-8.12194	4.58786e-16	2.85227e-14
300	MSTRG.8350	341.532	-0.84903	0.105062	-8.08122	6.41228e-16	3.97327e-14
301	MSTRG.1401	1449.21	0.49972	0.0618963	8.0735	6.83112e-16	4.21879e-14
302	MSTRG.18158	658.23	-0.661897	0.0824222	-8.03057	9.70246e-16	5.9723e-14
303	MSTRG.7868	1467.84	-0.717007	0.0893539	-8.02435	1.02063e-15	6.26178e-14
304	MSTRG.19352	423.377	-0.926369	0.115481	-8.02179	1.04212e-15	6.37267e-14
305	MSTRG.6883	2978.78	0.435458	0.0542951	8.02021	1.05568e-15	6.43448e-14
306	MSTRG.10503	34.5556	-2.33102	0.292032	-7.98205	1.43926e-15	8.74387e-14
307	MSTRG.8798	1017.05	-0.395903	0.0498009	-7.94971	1.86942e-15	1.13203e-13
308	MSTRG.9883	210.272	0.786596	0.0992182	7.92793	2.22823e-15	1.34494e-13
309	MSTRG.662	33.8993	-2.82603	0.356643	-7.92397	2.30039e-15	1.38402e-13
310	MSTRG.16779	16923.5	0.37079	0.0468174	7.91993	2.3764e-15	1.42515e-13
311	MSTRG.4592	1998.68	-0.591753	0.0752988	-7.85873	3.88048e-15	2.31971e-13
312	MSTRG.4613	1188.74	-2.05395	0.261695	-7.84864	4.20574e-15	2.50611e-13
313	MSTRG.12120	122.724	-1.90625	0.243521	-7.82785	4.96271e-15	2.94776e-13
314	MSTRG.18877	453.002	-0.706856	0.0904306	-7.81655	5.42893e-15	3.21444e-13
315	MSTRG.18470	203.733	-0.899452	0.115359	-7.79696	6.34173e-15	3.74303e-13
316	SMESG000024237.1	10.4585	3.54365	0.457525	7.74527	9.53812e-15	5.61185e-13
317	MSTRG.22872	493.357	0.535009	0.0692527	7.72546	1.11449e-14	6.53661e-13
318	MSTRG.1141	1720.13	-0.415957	0.0539131	-7.71533	1.20674e-14	7.05546e-13
319	MSTRG.17753	49.8874	-7.91737	1.03491	-7.65031	2.00489e-14	1.16854e-12
320	MSTRG.3580	413.382	-0.95666	0.125229	-7.63926	2.18478e-14	1.26942e-12
321	MSTRG.16286	1730.49	-0.786817	0.10306	-7.63456	2.26586e-14	1.31244e-12
322	MSTRG.9738	1948.56	0.290781	0.0381253	7.62699	2.403e-14	1.38757e-12
323	MSTRG.8198	1043.79	-0.383927	0.0505309	-7.59787	3.01037e-14	1.73292e-12
324	MSTRG.2320	41.7222	-6.3024	0.832391	-7.57144	3.69102e-14	2.11819e-12
325	MSTRG.14414	150.028	-0.844806	0.111655	-7.5662	3.84292e-14	2.1986e-12
326	MSTRG.21927	280.608	-0.982493	0.129905	-7.56318	3.93346e-14	2.24352e-12
327	MSTRG.13557	272.154	-0.792038	0.104894	-7.55086	4.32406e-14	2.45878e-12
328	MSTRG.10796	603.93	-0.470204	0.0622933	-7.54822	4.4123e-14	2.50133e-12
329	MSTRG.1273	701.616	-0.70377	0.0935294	-7.52459	5.28859e-14	2.98901e-12
330	MSTRG.9354	1796.18	-0.59102	0.0786409	-7.51542	5.67264e-14	3.19639e-12
331	MSTRG.7168	1328.81	-0.42408	0.056481	-7.50837	5.98692e-14	3.36332e-12
332	MSTRG.7876	1028.99	-0.603937	0.0810277	-7.45345	9.09275e-14	5.09276e-12
333	MSTRG.20235	1453.78	-0.721928	0.096906	-7.44978	9.34955e-14	5.22091e-12
334	MSTRG.13440	357.329	-0.826561	0.111473	-7.41487	1.21745e-13	6.77812e-12
335	MSTRG.8688	109.466	-1.15473	0.15615	-7.39498	1.41425e-13	7.85035e-12
336	MSTRG.6094	1002.2	-0.578898	0.0783526	-7.38837	1.48639e-13	8.22632e-12
337	MSTRG.17209	216.144	-0.680995	0.0922038	-7.38576	1.51585e-13	8.36454e-12
338	MSTRG.23629	285.348	-0.610111	0.0826471	-7.38213	1.5578e-13	8.57066e-12
339	MSTRG.7459	54.3212	-1.50558	0.204357	-7.3674	1.73983e-13	9.54399e-12
340	MSTRG.9900	10173.8	-0.685825	0.0931515	-7.36247	1.80535e-13	9.87437e-12
341	MSTRG.6987	6472.06	-0.484376	0.0658553	-7.35515	1.90707e-13	1.04002e-11
342	MSTRG.775	739.723	0.473529	0.0644199	7.35067	1.97219e-13	1.0724e-11
343	MSTRG.13369	2281.5	0.398153	0.0543717	7.3228	2.42846e-13	1.31666e-11
344	MSTRG.13534	26.2682	-3.58713	0.490522	-7.31287	2.61495e-13	1.41367e-11
345	MSTRG.3587	6219.17	-0.526859	0.0724065	-7.27641	3.42824e-13	1.84798e-11
346	MSTRG.678	2238.99	0.32859	0.0453431	7.24675	4.26894e-13	2.29452e-11
347	MSTRG.15393	523.635	0.436782	0.0603491	7.23759	4.56728e-13	2.44782e-11
348	MSTRG.4882	160.324	-1.01304	0.140174	-7.22703	4.9366e-13	2.63818e-11
349	MSTRG.9904	7008.38	-0.737647	0.102084	-7.22589	4.97836e-13	2.6529e-11
350	MSTRG.19479	455.142	0.669197	0.0930984	7.18807	6.57148e-13	3.49187e-11
351	MSTRG.9254	1414.74	-0.391524	0.0545666	-7.17516	7.22241e-13	3.82685e-11
352	MSTRG.16490	1214.59	-0.404555	0.0564651	-7.16468	7.79663e-13	4.1194e-11
353	MSTRG.8959	3236.87	-0.295288	0.0413327	-7.14416	9.0546e-13	4.77055e-11
354	MSTRG.21	242.196	-0.67704	0.0948123	-7.14085	9.27535e-13	4.87308e-11
355	MSTRG.1135	280.152	-0.852129	0.11948	-7.13197	9.89402e-13	5.18352e-11
356	MSTRG.9568	422.408	-0.735542	0.103548	-7.10342	1.21704e-12	6.35825e-11
357	MSTRG.1745	2056.89	-0.438087	0.0617063	-7.09956	1.25155e-12	6.52031e-11
358	MSTRG.16921	460.257	-0.537884	0.0758583	-7.09064	1.33491e-12	6.9352e-11
359	MSTRG.20313	5380.54	-0.852349	0.120543	-7.0709	1.53935e-12	7.97509e-11
360	MSTRG.6633	723.977	-0.578569	0.0818763	-7.06638	1.59032e-12	8.21637e-11
361	MSTRG.12634	920.363	-0.495432	0.0702847	-7.04894	1.80289e-12	9.28884e-11
362	MSTRG.12562	51.089	-1.49733	0.212549	-7.04462	1.85967e-12	9.555e-11
363	MSTRG.20314	3720.04	-0.875573	0.124807	-7.01539	2.29308e-12	1.17495e-10
364	MSTRG.1176	216.959	-1.4506	0.206831	-7.01345	2.32506e-12	1.18807e-10
365	MSTRG.483	182.941	-0.736763	0.105114	-7.00916	2.39751e-12	1.22175e-10
366	MSTRG.16183	58.8082	-1.4779	0.211235	-6.99651	2.62419e-12	1.33362e-10
367	MSTRG.4104	397.221	-0.604632	0.0867598	-6.96904	3.19122e-12	1.61738e-10
368	MSTRG.5434	105.891	-1.05219	0.151228	-6.95764	3.46014e-12	1.74892e-10
369	MSTRG.10596	104.058	-1.27558	0.184032	-6.93129	4.17008e-12	2.10206e-10
370	MSTRG.22018	510.669	-0.563542	0.0814257	-6.92093	4.48675e-12	2.25559e-10
371	MSTRG.1495	2756.12	-0.375277	0.0543417	-6.90588	4.98921e-12	2.50144e-10
372	MSTRG.13180	314.625	0.492912	0.0715211	6.89185	5.50732e-12	2.75381e-10
373	MSTRG.12981	3195.48	-0.35742	0.0519081	-6.88563	5.75342e-12	2.86917e-10
374	MSTRG.12617	71.6875	-1.51192	0.219805	-6.87848	6.04944e-12	3.00875e-10
375	MSTRG.5037	59.7548	-1.28668	0.187818	-6.85066	7.35107e-12	3.6464e-10
376	MSTRG.9913	25.2212	-2.35027	0.344374	-6.82476	8.80701e-12	4.35702e-10
377	MSTRG.8244	1454.81	-0.250853	0.0367698	-6.82226	8.96172e-12	4.42183e-10
378	MSTRG.6398	1404.39	0.341547	0.0501148	6.81529	9.40763e-12	4.62959e-10
379	MSTRG.3549	1266.48	0.286759	0.0420943	6.8123	9.60529e-12	4.71443e-10
380	SMESG000024208.1	7.26277	4.15896	0.610719	6.80993	9.76429e-12	4.77989e-10
381	MSTRG.16135	209.256	-0.705441	0.103956	-6.78594	1.15332e-11	5.63103e-10
382	MSTRG.4263	205.105	-0.801937	0.118237	-6.78248	1.18129e-11	5.75254e-10
383	MSTRG.15898	2303.88	-0.963712	0.142707	-6.75308	1.44737e-11	7.02991e-10
384	MSTRG.5465	3602.71	-0.220909	0.0327583	-6.74361	1.54495e-11	7.47419e-10
385	MSTRG.5742	1496.03	0.285993	0.0424106	6.74343	1.54685e-11	7.47419e-10
386	MSTRG.8144	466.724	-0.503988	0.0747576	-6.74163	1.56623e-11	7.54825e-10
387	MSTRG.17045	530.457	-0.475494	0.0705813	-6.73683	1.61877e-11	7.78137e-10
388	MSTRG.15893	246.93	-0.781212	0.116176	-6.72437	1.76358e-11	8.45567e-10
389	MSTRG.20870	344.096	0.660588	0.0984046	6.71298	1.90686e-11	9.1192e-10
390	MSTRG.2797	1549.12	-0.350334	0.0522138	-6.7096	1.95153e-11	9.30895e-10
391	MSTRG.118	145.051	-0.744853	0.111041	-6.70793	1.97402e-11	9.39221e-10
392	MSTRG.17179	652.381	-0.399122	0.059593	-6.69746	2.12069e-11	1.00644e-09
393	MSTRG.13519	375.982	-1.17714	0.175895	-6.69227	2.19734e-11	1.04017e-09
394	MSTRG.18974	940.72	-0.446647	0.0667487	-6.69147	2.20942e-11	1.04324e-09
395	MSTRG.13084	100.12	-0.970156	0.145182	-6.68233	2.35168e-11	1.1076e-09
396	MSTRG.7706	941.074	0.355818	0.053332	6.67176	2.52745e-11	1.18739e-09
397	MSTRG.22298	126.168	-0.840938	0.126159	-6.6657	2.63409e-11	1.23438e-09
398	MSTRG.4252	504.442	-0.451318	0.0678984	-6.64696	2.99207e-11	1.39862e-09
399	MSTRG.13595	19.7304	-3.12857	0.471366	-6.63724	3.19601e-11	1.49022e-09
400	MSTRG.621	2405.11	0.2169	0.0326872	6.63561	3.23161e-11	1.50306e-09
401	MSTRG.2435	1548.52	-0.337446	0.0508618	-6.63457	3.2544e-11	1.50989e-09
402	MSTRG.5321	1664.72	-0.444238	0.066987	-6.6317	3.31839e-11	1.53576e-09
403	MSTRG.20899	518.541	-0.458834	0.0692051	-6.63006	3.35549e-11	1.54909e-09
404	MSTRG.22656	464.18	-0.759236	0.114908	-6.60735	3.91256e-11	1.80181e-09
405	MSTRG.7906	2155.49	-0.4543	0.0689512	-6.58871	4.43652e-11	2.03807e-09
406	MSTRG.9924	1487.78	-0.772674	0.117661	-6.56692	5.13655e-11	2.35385e-09
407	MSTRG.5178	1148.53	-0.529792	0.080697	-6.56521	5.19604e-11	2.37528e-09
408	MSTRG.21278	29.9041	-2.94328	0.44852	-6.5622	5.30198e-11	2.41778e-09
409	MSTRG.20275	156.665	-0.816745	0.124508	-6.55979	5.38836e-11	2.45118e-09
410	MSTRG.18797	860.71	-0.386332	0.0589938	-6.54869	5.80448e-11	2.63405e-09
411	MSTRG.16809	59.9926	2.07391	0.31691	6.54418	5.98237e-11	2.70163e-09
412	MSTRG.2698	1053.84	0.457745	0.0699441	6.54444	5.97184e-11	2.70163e-09
413	MSTRG.20396	584.047	-0.837405	0.128401	-6.52178	6.94793e-11	3.13009e-09
414	MSTRG.8706	187.425	-0.853404	0.131056	-6.51173	7.42898e-11	3.33874e-09
415	MSTRG.20171	592.572	-0.567546	0.0871736	-6.51052	7.48912e-11	3.35768e-09
416	MSTRG.16749	1776.42	-0.450078	0.0692966	-6.49496	8.30569e-11	3.71486e-09
417	MSTRG.7038	130.537	-1.06602	0.164157	-6.49393	8.36234e-11	3.73124e-09
418	MSTRG.20963	898.374	-0.529794	0.0816224	-6.49079	8.53862e-11	3.80081e-09
419	MSTRG.16538	887.806	-0.345245	0.0532396	-6.48474	8.88852e-11	3.93776e-09
420	MSTRG.22716	661.245	-0.400911	0.0618216	-6.48497	8.87488e-11	3.93776e-09
421	MSTRG.6216	4094.35	0.399741	0.0616998	6.47881	9.24483e-11	4.08591e-09
422	MSTRG.18026	1291.28	0.366794	0.0566196	6.47821	9.28179e-11	4.09254e-09
423	MSTRG.3845	139.955	-0.710017	0.109791	-6.46701	9.996e-11	4.39706e-09
424	MSTRG.3724	4185	-0.437663	0.0677642	-6.45862	1.0566e-10	4.63686e-09
425	MSTRG.3184	24.5173	-4.42022	0.68482	-6.45457	1.08524e-10	4.75136e-09
426	MSTRG.13741	2544.05	-0.511074	0.0792538	-6.44857	1.12908e-10	4.93173e-09
427	MSTRG.18230	61.151	-1.16711	0.181275	-6.43831	1.20811e-10	5.26461e-09
428	MSTRG.3752	550.117	-0.447679	0.0696403	-6.42846	1.28907e-10	5.59128e-09
429	MSTRG.5404	378.548	-1.03798	0.161462	-6.42862	1.28769e-10	5.59128e-09
430	MSTRG.16180	84.2437	-1.13733	0.17714	-6.42052	1.35807e-10	5.87689e-09
431	MSTRG.2871	236.747	-0.617772	0.0964304	-6.4064	1.48995e-10	6.43264e-09
432	MSTRG.20112	50.0544	-3.10616	0.486738	-6.38159	1.75263e-10	7.54928e-09
433	MSTRG.13001	441.824	-0.444141	0.0697444	-6.36813	1.91341e-10	8.2228e-09
434	MSTRG.22598	7507.39	-0.374943	0.0589254	-6.36302	1.97825e-10	8.4819e-09
435	MSTRG.3674	388.84	-0.704678	0.111048	-6.34573	2.21379e-10	9.47004e-09
436	MSTRG.6754	10203	0.178951	0.0282213	6.341	2.28283e-10	9.74304e-09
437	MSTRG.12673	49.3686	-1.6074	0.254684	-6.31133	2.76643e-10	1.178e-08
438	MSTRG.5468	3414.34	-0.284353	0.0451066	-6.30402	2.90029e-10	1.23219e-08
439	MSTRG.22764	1227.92	-0.401626	0.0639119	-6.28406	3.29853e-10	1.3982e-08
440	MSTRG.7823	1038.8	-0.560325	0.0893397	-6.27186	3.5677e-10	1.50887e-08
441	MSTRG.929	359.064	-0.552777	0.0881859	-6.26831	3.64978e-10	1.54009e-08
442	MSTRG.22060	638.675	-0.464798	0.0742897	-6.25655	3.93576e-10	1.65702e-08
443	MSTRG.19355	2277.61	-0.436131	0.069713	-6.2561	3.9473e-10	1.65813e-08
444	MSTRG.4659	1157.99	-0.563272	0.0900989	-6.2517	4.06001e-10	1.70164e-08
445	MSTRG.7680	164.205	-0.933734	0.149406	-6.24964	4.11396e-10	1.72039e-08
446	MSTRG.3253	258.024	0.466715	0.0746936	6.24839	4.14704e-10	1.73035e-08
447	MSTRG.45	1225.93	0.337721	0.0541986	6.23118	4.62925e-10	1.92724e-08
448	MSTRG.16564	10.2478	2.5347	0.407243	6.22406	4.84454e-10	2.01237e-08
449	MSTRG.17047	63.3874	-2.20823	0.355738	-6.20748	5.38426e-10	2.2316e-08
450	MSTRG.11873	23.5666	-5.99969	0.967124	-6.20364	5.51711e-10	2.28159e-08
451	MSTRG.21736	327.084	0.863885	0.139582	6.18909	6.05132e-10	2.49697e-08
452	MSTRG.21206	127.57	-0.849807	0.137341	-6.18759	6.10928e-10	2.51532e-08
453	MSTRG.2099	69.8449	0.946353	0.153259	6.17485	6.62246e-10	2.7206e-08
454	MSTRG.9053	636.428	-0.408377	0.0661438	-6.17407	6.65547e-10	2.72816e-08
455	MSTRG.16408	2557.15	-0.627879	0.102039	-6.15333	7.58716e-10	3.10325e-08
456	MSTRG.6653	192.053	-0.869407	0.14199	-6.12303	9.18097e-10	3.74692e-08
457	MSTRG.18192	401.119	0.471755	0.0770515	6.12259	9.20689e-10	3.7493e-08
458	MSTRG.4785	27.5996	-2.00091	0.327325	-6.11289	9.78405e-10	3.97565e-08
459	MSTRG.6555	19.4746	-4.64103	0.760669	-6.10125	1.05241e-09	4.26707e-08
460	MSTRG.21268	11.587	-6.52152	1.07604	-6.06066	1.35562e-09	5.48452e-08
461	MSTRG.1800	7.60879	-6.56926	1.08456	-6.05706	1.38634e-09	5.59667e-08
462	MSTRG.13591	17.1295	-2.99786	0.496868	-6.03352	1.60427e-09	6.46248e-08
463	MSTRG.3576	2504.82	0.445671	0.0738927	6.03133	1.62619e-09	6.53667e-08
464	MSTRG.18231	2623.96	-0.203748	0.0338113	-6.02601	1.68053e-09	6.74056e-08
465	MSTRG.3054	19.8042	-3.60949	0.599739	-6.01843	1.76117e-09	7.04884e-08
466	MSTRG.13023	264.077	-1.02637	0.170596	-6.01638	1.78361e-09	7.12335e-08
467	MSTRG.14654	1423.23	-0.291627	0.0484802	-6.01539	1.7945e-09	7.15153e-08
468	MSTRG.4245	590.983	0.320432	0.0534456	5.99549	2.02876e-09	8.06788e-08
469	MSTRG.941	774.096	-0.374956	0.0625557	-5.99395	2.048e-09	8.12707e-08
470	MSTRG.7824	2194.14	0.266303	0.0444837	5.98653	2.14367e-09	8.48866e-08
471	MSTRG.13593	21.4258	-4.52632	0.756306	-5.98478	2.16687e-09	8.56234e-08
472	MSTRG.14075	3687.18	-0.325706	0.054426	-5.98439	2.17198e-09	8.56442e-08
473	MSTRG.6447	1461.02	-0.408703	0.0683035	-5.98364	2.18207e-09	8.58603e-08
474	MSTRG.19958	191.766	-0.632602	0.105772	-5.9808	2.22039e-09	8.71841e-08
475	MSTRG.21827	1627.35	-0.311955	0.0522217	-5.97366	2.31996e-09	9.09023e-08
476	MSTRG.7571	564.285	-0.446713	0.0751096	-5.94749	2.72287e-09	1.06466e-07
477	MSTRG.21430	641.596	0.518042	0.0871861	5.94179	2.81924e-09	1.10003e-07
478	MSTRG.13235	29.8134	-1.82587	0.307862	-5.93083	3.01405e-09	1.17359e-07
479	MSTRG.13169	2107.42	0.545634	0.0920506	5.92754	3.07503e-09	1.19484e-07
480	MSTRG.5464	790.307	-0.647592	0.109509	-5.9136	3.34705e-09	1.29783e-07
481	MSTRG.9353	716.851	-0.312826	0.0529177	-5.91156	3.38882e-09	1.3113e-07
482	MSTRG.10595	957.66	0.371219	0.0628254	5.90874	3.44725e-09	1.33115e-07
483	MSTRG.18591	303.959	-0.721476	0.122543	-5.88755	3.91963e-09	1.51044e-07
484	MSTRG.16974	217.954	-0.602233	0.102362	-5.88334	4.02058e-09	1.54614e-07
485	MSTRG.6390	46.1959	-1.34355	0.228544	-5.87875	4.1338e-09	1.58641e-07
486	MSTRG.20649	2295.85	-0.340499	0.0580547	-5.86514	4.48764e-09	1.71867e-07
487	MSTRG.9844	86.6727	-1.11185	0.189589	-5.86456	4.50335e-09	1.72115e-07
488	MSTRG.802	18.9509	-1.76554	0.301236	-5.861	4.60088e-09	1.75483e-07
489	MSTRG.19698	1406.72	-0.535856	0.0914525	-5.85939	4.64574e-09	1.76832e-07
490	MSTRG.8827	681.236	-0.467653	0.0798418	-5.85724	4.70623e-09	1.7877e-07
491	MSTRG.10826	197.967	0.551808	0.0943128	5.85082	4.89146e-09	1.85428e-07
492	MSTRG.21410	784.252	0.495712	0.0847734	5.84749	4.99051e-09	1.88799e-07
493	MSTRG.6463	47.6633	-1.44228	0.247467	-5.82818	5.6036e-09	2.11564e-07
494	MSTRG.5487	285.894	-0.712622	0.122316	-5.82608	5.67442e-09	2.13805e-07
495	MSTRG.8421	76.341	-1.12686	0.193476	-5.82427	5.73627e-09	2.157e-07
496	MSTRG.22628	208.039	-0.547424	0.0942927	-5.80559	6.41405e-09	2.40701e-07
497	MSTRG.16512	2625.54	0.359553	0.0619532	5.80363	6.48958e-09	2.43047e-07
498	MSTRG.14519	194.677	-0.657203	0.113407	-5.79507	6.82921e-09	2.55254e-07
499	MSTRG.18460	125.303	-1.35283	0.233775	-5.78691	7.16947e-09	2.67435e-07
500	MSTRG.23477	376.242	0.375074	0.064964	5.77357	7.76083e-09	2.88917e-07
501	MSTRG.1571	1345.76	0.336355	0.0582956	5.76982	7.93548e-09	2.9483e-07
502	MSTRG.20266	11.464	-4.39097	0.762617	-5.75777	8.5233e-09	3.1604e-07
503	MSTRG.21352	1741.47	0.558216	0.0970357	5.75269	8.78361e-09	3.25046e-07
504	MSTRG.13360	409.83	-0.37128	0.0645712	-5.74993	8.92782e-09	3.29728e-07
505	MSTRG.16108	2413.31	-0.430288	0.0749556	-5.74057	9.43557e-09	3.47792e-07
506	MSTRG.1085	384.001	-0.547077	0.0954024	-5.73441	9.78533e-09	3.59839e-07
507	MSTRG.9462	2650.98	-0.534977	0.0932968	-5.73414	9.80099e-09	3.59839e-07
508	MSTRG.3832	51.7879	-1.65476	0.289065	-5.72451	1.03735e-08	3.8011e-07
509	MSTRG.20136	97.1426	0.728275	0.127444	5.71448	1.10039e-08	4.0242e-07
510	MSTRG.16446	721.514	-0.322114	0.0565	-5.70113	1.19014e-08	4.34388e-07
511	MSTRG.23231	142.799	0.655979	0.115272	5.69073	1.26501e-08	4.60813e-07
512	MSTRG.20770	2161.29	-0.291266	0.0512279	-5.68569	1.30288e-08	4.73685e-07
513	MSTRG.21903	192.94	-0.530806	0.0934442	-5.68046	1.34331e-08	4.86983e-07
514	MSTRG.481	36.1767	-1.54676	0.272303	-5.68029	1.34468e-08	4.86983e-07
515	MSTRG.15808	164.984	-0.57663	0.101534	-5.67918	1.3534e-08	4.89193e-07
516	MSTRG.18266	1478.05	-0.354927	0.0625287	-5.67623	1.37697e-08	4.96747e-07
517	MSTRG.6991	225.37	-1.11115	0.195882	-5.67255	1.40692e-08	5.06571e-07
518	MSTRG.19692	500.426	-0.337838	0.059634	-5.66519	1.46861e-08	5.27764e-07
519	MSTRG.15401	510.248	-0.42115	0.0743966	-5.66087	1.50605e-08	5.40179e-07
520	MSTRG.10068	266.047	-0.644598	0.114072	-5.65079	1.59716e-08	5.71759e-07
521	MSTRG.22451	973.888	0.389149	0.0693068	5.61488	1.96693e-08	7.02783e-07
522	MSTRG.3831	17.205	-2.19757	0.391545	-5.61255	1.99369e-08	7.10981e-07
523	MSTRG.8328	1311.81	-0.259028	0.0461874	-5.6082	2.04446e-08	7.27694e-07
524	MSTRG.7744	8.58345	-5.99779	1.07072	-5.60166	2.12307e-08	7.54235e-07
525	MSTRG.19155	17.0015	-2.54008	0.454087	-5.59382	2.22129e-08	7.87629e-07
526	MSTRG.16531	223.303	-0.667445	0.119525	-5.58416	2.34839e-08	8.31116e-07
527	MSTRG.16167	248.431	-0.526465	0.0942912	-5.5834	2.35868e-08	8.33177e-07
528	MSTRG.20631	497.091	-0.415937	0.0745733	-5.57756	2.43916e-08	8.59978e-07
529	MSTRG.15115	17143.1	-0.226737	0.0407843	-5.55942	2.70667e-08	9.52493e-07
530	MSTRG.7513	3230.67	-0.275984	0.0496621	-5.55723	2.74083e-08	9.62696e-07
531	MSTRG.13533	139.053	-0.67646	0.121849	-5.55163	2.8301e-08	9.92186e-07
532	MSTRG.1595	3479.96	-0.400724	0.0722158	-5.54897	2.87351e-08	1.00551e-06
533	MSTRG.14253	1014.21	-0.450277	0.081207	-5.54481	2.94278e-08	1.02782e-06
534	MSTRG.4366	10.5021	-3.88085	0.700097	-5.54331	2.96805e-08	1.03471e-06
535	MSTRG.2582	80.8825	-1.01127	0.182729	-5.53424	3.12573e-08	1.08765e-06
536	MSTRG.12740	547.322	0.383357	0.0694133	5.52282	3.33606e-08	1.15868e-06
537	MSTRG.7223	76.8275	-0.941039	0.170463	-5.5205	3.38033e-08	1.17187e-06
538	MSTRG.15088	16.8432	1.43606	0.260805	5.50626	3.66542e-08	1.26834e-06
539	MSTRG.2045	1154.09	-0.260945	0.0474204	-5.50279	3.73821e-08	1.29113e-06
540	MSTRG.321	474.365	-0.927564	0.168624	-5.50079	3.78084e-08	1.30345e-06
541	MSTRG.8965	12.1084	-3.85242	0.700615	-5.49863	3.82762e-08	1.31714e-06
542	MSTRG.8104	1022.42	-0.349209	0.0636129	-5.4896	4.02845e-08	1.38369e-06
543	MSTRG.18343	1983.62	-0.470094	0.0856923	-5.48584	4.11517e-08	1.41088e-06
544	MSTRG.3198	1015.44	-0.253357	0.0463188	-5.46986	4.50391e-08	1.54133e-06
545	MSTRG.12022	361.102	0.555389	0.101558	5.46869	4.53364e-08	1.54866e-06
546	MSTRG.20184	2643.34	0.478914	0.0876432	5.46435	4.64594e-08	1.58412e-06
547	MSTRG.16190	13.4285	-5.79656	1.06185	-5.45891	4.79067e-08	1.63049e-06
548	MSTRG.976	99.9088	-0.830033	0.152108	-5.45688	4.84582e-08	1.64626e-06
549	MSTRG.8170	455.673	0.410219	0.0752903	5.44849	5.07985e-08	1.72262e-06
550	MSTRG.23691	8018.95	0.18876	0.0346488	5.4478	5.09963e-08	1.72619e-06
551	MSTRG.4014	1011.34	-0.428902	0.0789674	-5.43138	5.59192e-08	1.8894e-06
552	MSTRG.1576	481.557	-0.546613	0.101006	-5.41169	6.24315e-08	2.10562e-06
553	MSTRG.20589	389.965	-0.458736	0.0848056	-5.40926	6.32843e-08	2.13053e-06
554	MSTRG.14651	1390.36	-0.381856	0.070845	-5.39002	7.04505e-08	2.36752e-06
555	MSTRG.4476	888.206	0.379042	0.0704441	5.38075	7.41776e-08	2.48828e-06
556	MSTRG.21270	28.7422	-2.11869	0.394084	-5.37624	7.60593e-08	2.54683e-06
557	MSTRG.4342	24.8478	1.95025	0.36278	5.37585	7.62235e-08	2.54775e-06
558	MSTRG.20369	141.242	-0.645658	0.120142	-5.37413	7.69538e-08	2.56756e-06
559	MSTRG.12950	1860.31	-0.429194	0.079939	-5.36903	7.91626e-08	2.63654e-06
560	MSTRG.5368	189.022	0.557398	0.104062	5.35641	8.48908e-08	2.82228e-06
561	MSTRG.4111	2637.72	-0.220582	0.0412013	-5.35375	8.61475e-08	2.85896e-06
562	MSTRG.17165	159.767	-0.572831	0.107011	-5.35303	8.64918e-08	2.86529e-06
563	MSTRG.10116	1297.56	-0.276856	0.0517777	-5.347	8.94217e-08	2.9571e-06
564	MSTRG.3847	2517.61	-0.248666	0.046526	-5.34466	9.05859e-08	2.9903e-06
565	MSTRG.1574	970.117	-0.430492	0.0805629	-5.34355	9.11448e-08	3.00343e-06
566	MSTRG.12259	6.86469	3.23493	0.606209	5.33633	9.48462e-08	3.11989e-06
567	MSTRG.1683	161.871	-0.599833	0.112522	-5.33081	9.77782e-08	3.21067e-06
568	MSTRG.13149	187.521	-0.672008	0.126084	-5.32985	9.82954e-08	3.22198e-06
569	MSTRG.8665	34.124	-1.36033	0.255462	-5.32496	1.00975e-07	3.30402e-06
570	MSTRG.8981	1585.59	-0.335166	0.0630118	-5.31911	1.04279e-07	3.40614e-06
571	MSTRG.20828	419.886	-0.470211	0.0885412	-5.31065	1.09238e-07	3.56188e-06
572	MSTRG.29	122.969	-0.782137	0.147318	-5.30919	1.10115e-07	3.58422e-06
573	MSTRG.10183	1260.82	-0.229586	0.0432482	-5.30857	1.1049e-07	3.59017e-06
574	MSTRG.20479	866.921	-0.261584	0.0492936	-5.30665	1.11656e-07	3.62174e-06
575	MSTRG.12126	51.7625	-1.12127	0.212172	-5.28474	1.25885e-07	4.07618e-06
576	MSTRG.7450	80.4701	-1.05006	0.198744	-5.28347	1.26756e-07	4.09728e-06
577	MSTRG.22844	3114.99	0.31581	0.0598418	5.27741	1.31019e-07	4.22774e-06
578	MSTRG.21743	787.517	-0.275849	0.052291	-5.27527	1.32561e-07	4.2701e-06
579	MSTRG.16738	158.924	-0.676489	0.128254	-5.27462	1.3303e-07	4.27783e-06
580	MSTRG.13963	33.5681	-2.89041	0.549607	-5.25905	1.44804e-07	4.64046e-06
581	MSTRG.15445	153.027	-0.567635	0.107934	-5.25909	1.44771e-07	4.64046e-06
582	MSTRG.12107	5382.86	-0.369975	0.070438	-5.25249	1.50054e-07	4.80043e-06
583	MSTRG.8407	351.879	-0.400063	0.0761874	-5.25104	1.51241e-07	4.83012e-06
584	MSTRG.12190	12.4357	-4.08079	0.777606	-5.24789	1.53854e-07	4.90517e-06
585	MSTRG.12439	36.1898	-1.22992	0.234413	-5.24679	1.54776e-07	4.92616e-06
586	MSTRG.4460	1276.57	-0.344118	0.0656789	-5.23939	1.61105e-07	5.11885e-06
587	MSTRG.8780	3102.81	-0.206717	0.0396026	-5.21979	1.79126e-07	5.68177e-06
588	MSTRG.3802	2018.06	0.21067	0.0403654	5.21906	1.7983e-07	5.69441e-06
589	MSTRG.5430	87.3051	-0.796675	0.153464	-5.19127	2.08859e-07	6.60242e-06
590	MSTRG.11676	3294.88	-0.211632	0.0411387	-5.14436	2.6844e-07	8.47153e-06
591	MSTRG.12461	274.826	-0.736452	0.143209	-5.14248	2.7113e-07	8.54197e-06
592	MSTRG.18763	120.483	-0.692494	0.135188	-5.12247	3.01558e-07	9.46862e-06
593	MSTRG.20580	686.885	-0.281176	0.0548897	-5.12257	3.01392e-07	9.46862e-06
594	MSTRG.13316	283.094	-0.445012	0.0870446	-5.11246	3.17992e-07	9.96784e-06
595	MSTRG.7872	86248.3	0.181966	0.035661	5.10266	3.34909e-07	1.04805e-05
596	MSTRG.6042	277.431	0.53956	0.105918	5.09413	3.50355e-07	1.09455e-05
597	MSTRG.4053	357.365	-0.4609	0.0906357	-5.08519	3.67254e-07	1.14543e-05
598	MSTRG.21121	11553.3	0.22713	0.0447076	5.08034	3.76755e-07	1.1731e-05
599	MSTRG.19146	32.3865	22.8707	4.51529	5.06516	4.08047e-07	1.2663e-05
600	MSTRG.2546	2766.84	-0.220731	0.0435759	-5.06543	4.07477e-07	1.2663e-05
601	MSTRG.19259	173.567	0.546793	0.107975	5.06405	4.10445e-07	1.27163e-05
602	MSTRG.18293	12.0778	-5.02782	0.995046	-5.05285	4.35258e-07	1.34404e-05
603	MSTRG.21041	579.358	0.347192	0.0687106	5.05296	4.35024e-07	1.34404e-05
604	MSTRG.4911	214.425	0.458503	0.0909034	5.04385	4.56258e-07	1.40656e-05
605	MSTRG.12304	3968.05	0.426699	0.0847395	5.03542	4.76806e-07	1.46748e-05
606	MSTRG.4457	81.4728	-0.915903	0.181974	-5.03314	4.82516e-07	1.4826e-05
607	MSTRG.21333	20.8882	-1.81626	0.362374	-5.01212	5.38337e-07	1.6514e-05
608	MSTRG.23309	75.8523	-0.738869	0.147488	-5.00969	5.45168e-07	1.66961e-05
609	MSTRG.4894	29.3356	-1.66995	0.333844	-5.00218	5.66864e-07	1.73321e-05
610	MSTRG.22809	142.406	-0.937778	0.187557	-4.99997	5.73384e-07	1.75027e-05
611	MSTRG.9684	10788.7	-0.405119	0.0812034	-4.98894	6.07109e-07	1.85019e-05
612	MSTRG.8245	548.485	0.271064	0.0543832	4.98434	6.21733e-07	1.89167e-05
613	MSTRG.23451	362.757	0.387807	0.0778858	4.97917	6.3857e-07	1.93974e-05
614	MSTRG.10722	8.15047	-3.59876	0.72399	-4.97073	6.67005e-07	2.02281e-05
615	MSTRG.10919	747.393	-0.258903	0.0521376	-4.96576	6.84338e-07	2.07201e-05
616	MSTRG.6492	904.044	-0.240081	0.0483727	-4.96316	6.93546e-07	2.09649e-05
617	MSTRG.22085	212.465	-0.57647	0.116196	-4.96119	7.00631e-07	2.11448e-05
618	MSTRG.20832	136.832	0.834753	0.168559	4.9523	7.33424e-07	2.20987e-05
619	MSTRG.21347	41.6228	-1.07671	0.217583	-4.94851	7.47838e-07	2.24967e-05
620	MSTRG.22945	1468.25	-0.217895	0.0440375	-4.94794	7.50014e-07	2.25258e-05
621	MSTRG.16732	85.6381	-0.765562	0.154751	-4.94705	7.53465e-07	2.25931e-05
622	MSTRG.8955	70.0139	-0.803579	0.162492	-4.94535	7.60054e-07	2.27541e-05
623	MSTRG.13157	1013.89	-0.217152	0.0439301	-4.94313	7.68789e-07	2.29787e-05
624	MSTRG.5393	523.011	0.388431	0.0786727	4.93731	7.92089e-07	2.36372e-05
625	MSTRG.3262	3029.34	-0.252255	0.0511213	-4.93445	8.03783e-07	2.39479e-05
626	MSTRG.19149	1890.1	0.212833	0.0432685	4.91889	8.70381e-07	2.58907e-05
627	MSTRG.13429	129.788	-0.650396	0.13225	-4.91792	8.74678e-07	2.59771e-05
628	MSTRG.13075	33.2879	-1.35916	0.277517	-4.89759	9.70174e-07	2.87674e-05
629	MSTRG.13280	4609.93	0.115684	0.0236818	4.88493	1.03463e-06	3.063e-05
630	MSTRG.20363	1041.07	0.291583	0.0598977	4.86802	1.12721e-06	3.3318e-05
631	MSTRG.597	95.7196	0.604996	0.124492	4.85971	1.17556e-06	3.46921e-05
632	MSTRG.21263	15.1363	-4.96182	1.02163	-4.85675	1.19326e-06	3.51589e-05
633	MSTRG.5480	2222.88	-0.302149	0.0622892	-4.85075	1.22997e-06	3.61832e-05
634	MSTRG.18730	588.592	-0.37685	0.0777604	-4.8463	1.25783e-06	3.69444e-05
635	MSTRG.14012	754.521	0.250556	0.0517302	4.84352	1.2756e-06	3.74076e-05
636	MSTRG.14248	192.027	-0.55024	0.113911	-4.83044	1.36234e-06	3.98885e-05
637	MSTRG.21396	224.377	0.548282	0.113675	4.82323	1.41252e-06	4.12929e-05
638	MSTRG.16346	909.948	0.45913	0.095213	4.82214	1.42028e-06	4.14549e-05
639	MSTRG.9932	1793.66	-0.221539	0.0459498	-4.82133	1.42605e-06	4.15583e-05
640	MSTRG.20182	800.921	0.709382	0.147272	4.81681	1.45872e-06	4.24439e-05
641	MSTRG.6110	580.501	-0.296858	0.061684	-4.81256	1.49008e-06	4.32889e-05
642	MSTRG.14823	598.606	-0.419396	0.0871589	-4.81186	1.49533e-06	4.3374e-05
643	MSTRG.809	428.267	0.407945	0.0849462	4.80239	1.56781e-06	4.54056e-05
644	MSTRG.5744	2432.95	-0.216035	0.0451003	-4.79011	1.66689e-06	4.82003e-05
645	MSTRG.2738	681.918	-0.27732	0.0580789	-4.77488	1.79812e-06	5.19143e-05
646	MSTRG.207	556.732	-0.312955	0.0655966	-4.77089	1.8341e-06	5.28714e-05
647	MSTRG.10415	506.017	-0.586747	0.123064	-4.76781	1.86236e-06	5.36032e-05
648	MSTRG.12379	34.7801	-2.26641	0.475556	-4.76581	1.88092e-06	5.39877e-05
649	MSTRG.3503	14.3609	2.13481	0.447949	4.76575	1.88151e-06	5.39877e-05
650	MSTRG.6491	372.378	0.382184	0.0803069	4.75904	1.9452e-06	5.57294e-05
651	MSTRG.5713	295.238	0.433202	0.0911564	4.75229	2.01121e-06	5.75322e-05
652	MSTRG.2557	521.382	-0.360427	0.0759303	-4.74682	2.06644e-06	5.90218e-05
653	MSTRG.12298	371.162	0.452624	0.0954317	4.74291	2.10668e-06	6.0079e-05
654	MSTRG.9998	3327.07	0.180196	0.0380107	4.74067	2.13015e-06	6.06556e-05
655	MSTRG.22311	250.46	-0.470715	0.0993977	-4.73567	2.18332e-06	6.20747e-05
656	MSTRG.15113	435.78	-0.321058	0.0679388	-4.72569	2.29338e-06	6.51048e-05
657	MSTRG.6210	1112.08	0.413248	0.0875141	4.72208	2.3345e-06	6.61714e-05
658	MSTRG.17913	456.863	-0.406219	0.0862092	-4.71201	2.4528e-06	6.9419e-05
659	MSTRG.3318	1549.91	0.167023	0.0355627	4.69657	2.64572e-06	7.47657e-05
660	MSTRG.20118	930.922	-0.541022	0.115218	-4.69564	2.65774e-06	7.49917e-05
661	MSTRG.1635	163.058	0.496526	0.10575	4.69527	2.66251e-06	7.50129e-05
662	MSTRG.18112	1759.06	-0.185841	0.0395949	-4.69354	2.68512e-06	7.55358e-05
663	MSTRG.8894	7.49464	-5.03899	1.07386	-4.69239	2.70035e-06	7.58499e-05
664	MSTRG.5286	501.52	-0.347515	0.074069	-4.69178	2.70844e-06	7.59627e-05
665	MSTRG.3183	10.0598	-3.10246	0.661677	-4.68879	2.74827e-06	7.6964e-05
666	MSTRG.21327	869.171	0.475472	0.101444	4.68704	2.77181e-06	7.75067e-05
667	MSTRG.13474	199.427	-0.573514	0.122608	-4.67764	2.902e-06	8.10256e-05
668	MSTRG.21211	496.626	-0.334845	0.0716822	-4.67124	2.99391e-06	8.34669e-05
669	MSTRG.7488	1812.46	-0.184892	0.0396597	-4.66197	3.1319e-06	8.71837e-05
670	MSTRG.5233	1780.97	-0.218826	0.0469861	-4.65724	3.20479e-06	8.90798e-05
671	MSTRG.9161	997.34	-0.227523	0.0488707	-4.65562	3.23013e-06	8.96507e-05
672	MSTRG.3196	658.541	-0.27633	0.0593692	-4.65444	3.24867e-06	9.00311e-05
673	MSTRG.2912	2846.52	0.166762	0.03587	4.64907	3.33437e-06	9.22689e-05
674	MSTRG.7679	49.5492	-1.06304	0.228873	-4.64467	3.40627e-06	9.41189e-05
675	MSTRG.21436	833.965	-0.552003	0.118924	-4.64165	3.45645e-06	9.53644e-05
676	MSTRG.17906	10677.8	0.280189	0.0604279	4.63675	3.53929e-06	9.73933e-05
677	MSTRG.4902	1281.99	-0.240342	0.0518349	-4.63668	3.54043e-06	9.73933e-05
678	MSTRG.18132	8.23073	-5.21938	1.12605	-4.63514	3.56695e-06	9.79781e-05
679	MSTRG.6573	221.364	-0.563108	0.121569	-4.632	3.62148e-06	9.93297e-05
680	MSTRG.7556	183.677	-0.447716	0.0966883	-4.63051	3.64759e-06	9.9899e-05
681	MSTRG.14673	78.5238	0.674308	0.145846	4.62343	3.77454e-06	0.000103224
682	MSTRG.13367	254.111	-0.750262	0.162604	-4.61405	3.94907e-06	0.000107839
683	MSTRG.4259	3982.34	0.183877	0.039901	4.60834	4.05902e-06	0.00011068
684	MSTRG.10523	297.129	-0.392091	0.0852142	-4.60124	4.19985e-06	0.000114352
685	MSTRG.6330	10986.5	0.594899	0.129312	4.60049	4.21495e-06	0.000114596
686	MSTRG.18966	1305.57	-0.362153	0.0788152	-4.59497	4.32816e-06	0.000117503
687	MSTRG.6938	386.653	-0.378763	0.0824714	-4.59266	4.37637e-06	0.000118639
688	MSTRG.22022	904.318	-0.29576	0.064501	-4.58535	4.53224e-06	0.000122686
689	MSTRG.9948	29.04	1.11101	0.242312	4.58503	4.53922e-06	0.000122697
690	MSTRG.11084	2665.53	0.288526	0.0630045	4.57945	4.66198e-06	0.000125833
691	MSTRG.8754	245.622	-0.402881	0.0880825	-4.57391	4.78704e-06	0.000129022
692	MSTRG.11975	255.984	0.409145	0.0895306	4.56989	4.87991e-06	0.000131335
693	MSTRG.23616	560.52	-0.308912	0.067721	-4.56155	5.07782e-06	0.000136464
694	MSTRG.17654	26.6539	-1.3986	0.306653	-4.56086	5.09438e-06	0.000136713
695	MSTRG.13782	9.77145	-4.02607	0.883575	-4.55657	5.19945e-06	0.000139332
696	MSTRG.15502	3274.78	0.4265	0.0936915	4.55217	5.30955e-06	0.000142078
697	MSTRG.7304	1261.85	0.214275	0.0471571	4.54386	5.52337e-06	0.000147588
698	MSTRG.12440	420.653	-0.357564	0.0787054	-4.54307	5.5442e-06	0.000147932
699	MSTRG.18579	49.1333	-1.1459	0.252798	-4.53285	5.81928e-06	0.000155051
700	MSTRG.15954	1213.28	0.240584	0.0531446	4.52696	5.98375e-06	0.000159205
701	MSTRG.4169	93.534	0.610148	0.134804	4.52617	6.00617e-06	0.000159574
702	MSTRG.14218	186.656	-0.446127	0.0986907	-4.52045	6.17079e-06	0.000163715
703	MSTRG.16857	788.207	0.337252	0.0747662	4.51076	6.45971e-06	0.000171136
704	MSTRG.9862	890.955	0.24927	0.0553048	4.50721	6.56858e-06	0.000173774
705	MSTRG.6334	38427.6	0.408322	0.0906088	4.50643	6.59287e-06	0.00017417
706	MSTRG.4901	2192.27	-0.210675	0.0467557	-4.50587	6.61026e-06	0.000174382
707	MSTRG.22990	126.837	0.48818	0.108491	4.49974	6.80362e-06	0.000179229
708	MSTRG.9311	1325.74	-0.284592	0.0632645	-4.49844	6.84544e-06	0.000180077
709	MSTRG.5077	409.198	-0.411781	0.0915475	-4.49801	6.85937e-06	0.000180189
710	MSTRG.15999	112.304	-0.642341	0.142824	-4.49744	6.8778e-06	0.000180419
711	MSTRG.22364	3758.78	-0.285235	0.0634448	-4.4958	6.93103e-06	0.00018156
712	MSTRG.5604	24.414	-1.79292	0.398933	-4.49429	6.98013e-06	0.00018259
713	MSTRG.10419	2894.99	0.12917	0.0287576	4.49167	7.0666e-06	0.000184593
714	MSTRG.8756	1201.87	-0.226913	0.0505468	-4.48917	7.15004e-06	0.000186511
715	MSTRG.10531	2525.82	0.179136	0.0399424	4.48486	7.29612e-06	0.000190056
716	MSTRG.20583	351.113	-0.532324	0.118775	-4.48177	7.40254e-06	0.000192559
717	MSTRG.13167	130.418	0.61642	0.137765	4.47444	7.66122e-06	0.00019901
718	MSTRG.19331	730.016	0.397466	0.0888715	4.47237	7.73572e-06	0.000200666
719	MSTRG.17137	1029.02	-0.350331	0.0785445	-4.46029	8.1848e-06	0.00021202
720	MSTRG.16972	515.54	0.322538	0.0724512	4.45179	8.51582e-06	0.000219984
721	MSTRG.19108	2057.24	0.204278	0.0458853	4.45194	8.50997e-06	0.000219984
722	MSTRG.13649	31.8187	-1.12942	0.25384	-4.44932	8.61417e-06	0.000222217
723	MSTRG.5729	837.401	-0.52139	0.117354	-4.44289	8.87566e-06	0.000228646
724	MSTRG.13626	929.184	-0.286804	0.0646439	-4.43667	9.13592e-06	0.000235026
725	MSTRG.5574	20134.1	0.151098	0.0340738	4.43444	9.23108e-06	0.000237147
726	MSTRG.15406	77.1136	0.621612	0.140209	4.43347	9.27276e-06	0.00023789
727	MSTRG.20606	6508.94	0.220495	0.049742	4.43278	9.30245e-06	0.000238324
728	MSTRG.22831	2744.47	0.130644	0.029502	4.42832	9.49712e-06	0.000242978
729	MSTRG.1187	4924.95	-0.166185	0.0375784	-4.42235	9.76314e-06	0.000249396
730	MSTRG.21357	1259.17	0.466319	0.105452	4.4221	9.77471e-06	0.000249396
731	MSTRG.6392	3262.34	-0.164493	0.0372239	-4.41902	9.91483e-06	0.000252625
732	MSTRG.4884	782.818	0.22134	0.0501283	4.41548	1.00787e-05	0.00025645
733	MSTRG.3027	93.8683	-0.685407	0.15525	-4.41485	1.01078e-05	0.000256841
734	MSTRG.22873	3688	0.15087	0.034185	4.41334	1.01787e-05	0.000258291
735	MSTRG.12463	427.518	0.31768	0.072022	4.41088	1.02953e-05	0.000260893
736	MSTRG.4452	749.698	-0.272788	0.061859	-4.40983	1.0345e-05	0.000261797
737	MSTRG.201	4615.74	0.216513	0.0491055	4.40914	1.0378e-05	0.000262275
738	MSTRG.19685	19757.1	0.175125	0.0397588	4.40469	1.05936e-05	0.000267362
739	MSTRG.2103	870.972	0.257649	0.0585121	4.40334	1.06598e-05	0.00026867
740	MSTRG.21316	80.9388	0.869462	0.197485	4.40267	1.06928e-05	0.000269137
741	MSTRG.4075	510.842	0.340128	0.0773427	4.39767	1.09419e-05	0.000275038
742	MSTRG.6331	8173.93	0.430432	0.0979172	4.39587	1.10328e-05	0.000276948
743	MSTRG.22757	14.9864	-2.16393	0.49274	-4.39162	1.12508e-05	0.000282042
744	MSTRG.13523	419.486	-0.950043	0.216396	-4.39029	1.13197e-05	0.000283388
745	MSTRG.15141	446.51	-0.512741	0.117222	-4.37409	1.2194e-05	0.000304867
746	MSTRG.5387	120.665	-0.56047	0.128166	-4.373	1.22553e-05	0.000305988
747	MSTRG.3619	21117.8	0.21494	0.0491576	4.37247	1.22851e-05	0.000306323
748	MSTRG.19303	512.525	-0.462823	0.105939	-4.36879	1.2494e-05	0.000311115
749	MSTRG.20058	984.856	0.200972	0.0460556	4.36369	1.27887e-05	0.000318029
750	MSTRG.7044	1692.27	0.24405	0.0560063	4.35755	1.31524e-05	0.000326639
751	MSTRG.1855	15.6067	-2.29731	0.527349	-4.35633	1.3226e-05	0.000328031
752	MSTRG.4604	152.297	0.457351	0.105086	4.35216	1.34801e-05	0.000333886
753	MSTRG.22037	53.6641	-1.10731	0.254917	-4.34382	1.40025e-05	0.000346367
754	MSTRG.9682	7711.11	-0.396867	0.0914153	-4.34137	1.416e-05	0.000349798
755	MSTRG.16041	1113.46	0.201616	0.0465689	4.3294	1.49515e-05	0.000368863
756	MSTRG.22389	120.479	0.553189	0.127795	4.32871	1.49984e-05	0.000369532
757	MSTRG.984	3669.44	0.263608	0.0609123	4.32767	1.50692e-05	0.000370786
758	MSTRG.13071	782.245	0.236792	0.0547475	4.32517	1.52415e-05	0.000374531
759	MSTRG.4777	789.878	-0.335605	0.077792	-4.31413	1.60233e-05	0.000393225
760	MSTRG.8366	502.28	0.556124	0.129019	4.31039	1.62964e-05	0.000399401
761	MSTRG.13738	45.964	-1.34509	0.312508	-4.30418	1.67605e-05	0.000410235
762	MSTRG.23326	154.294	-0.583593	0.135751	-4.299	1.71573e-05	0.000419398
763	MSTRG.20845	2295.27	-0.175393	0.0408846	-4.28995	1.7871e-05	0.000436273
764	MSTRG.3357	10.2226	-2.81897	0.657566	-4.28698	1.81119e-05	0.000441574
765	MSTRG.1153	9236.84	0.327445	0.076465	4.28229	1.84984e-05	0.000450409
766	MSTRG.16237	96.6211	-0.521337	0.121831	-4.27917	1.87591e-05	0.000455569
767	MSTRG.3979	463.348	-0.265112	0.0619514	-4.27936	1.87435e-05	0.000455569
768	MSTRG.7734	346.468	-0.379972	0.0889096	-4.27369	1.92266e-05	0.000466314
769	MSTRG.16752	28809.5	0.127255	0.0297872	4.27212	1.93622e-05	0.000468992
770	MSTRG.12937	617.684	-0.547685	0.128634	-4.25771	2.06534e-05	0.000499619
771	MSTRG.13467	371.475	0.326188	0.076646	4.25577	2.08327e-05	0.000503305
772	MSTRG.10455	649.271	-0.228596	0.0537504	-4.25293	2.10994e-05	0.000509088
773	MSTRG.21775	704.731	0.251849	0.0593198	4.24561	2.17996e-05	0.000525303
774	MSTRG.14011	149.387	-0.513722	0.121029	-4.24463	2.18952e-05	0.000526701
775	MSTRG.21115	10.0857	-2.83151	0.66711	-4.24444	2.19141e-05	0.000526701
776	MSTRG.12618	8.05827	-3.75148	0.884904	-4.23942	2.241e-05	0.000537927
777	MSTRG.23071	1197.88	-0.240036	0.0566495	-4.23722	2.26306e-05	0.000542524
778	MSTRG.867	477.514	-0.278806	0.0659355	-4.22847	2.35284e-05	0.000563322
779	MSTRG.3179	195.28	0.845711	0.200103	4.22638	2.37484e-05	0.00056786
780	MSTRG.19354	20.673	-1.60755	0.380444	-4.22546	2.38452e-05	0.000569402
781	MSTRG.6089	2668.82	0.127336	0.0301374	4.22519	2.38739e-05	0.000569402
782	MSTRG.17362	6.84068	-2.42181	0.573596	-4.22215	2.41985e-05	0.000576407
783	MSTRG.21529	510.762	0.351737	0.083385	4.21823	2.46228e-05	0.000585765
784	MSTRG.20181	3392.74	0.74073	0.175959	4.20967	2.55746e-05	0.000607634
785	MSTRG.20471	52.1994	-0.893115	0.212318	-4.20651	2.59349e-05	0.000615409
786	MSTRG.9010	2859.91	0.210434	0.0501271	4.198	2.69281e-05	0.000638165
787	MSTRG.8118	52.5925	-1.69625	0.404709	-4.1913	2.77366e-05	0.000656491
788	MSTRG.11019	418.525	0.369776	0.0882703	4.18913	2.80028e-05	0.000661952
789	MSTRG.14235	2709.97	-0.220056	0.0526959	-4.17596	2.96726e-05	0.000700536
790	MSTRG.16843	1778.88	0.418938	0.100332	4.1755	2.97328e-05	0.000701071
791	MSTRG.14384	53.8241	-1.24537	0.298344	-4.17427	2.98942e-05	0.000703987
792	MSTRG.18222	210.589	-0.334935	0.0802471	-4.17379	2.99569e-05	0.000704573
793	MSTRG.8497	12.9405	1.11386	0.266969	4.17224	3.01613e-05	0.000708488
794	MSTRG.4572	85.9636	0.569497	0.13651	4.17185	3.02143e-05	0.000708839
795	MSTRG.11768	1829.43	-0.224411	0.0538101	-4.17042	3.04033e-05	0.000712103
796	MSTRG.7538	1131.54	-0.292034	0.0700284	-4.17023	3.04298e-05	0.000712103
797	SMESG000067075.1	8.34797	-2.81544	0.675446	-4.16827	3.0692e-05	0.000717338
798	MSTRG.9243	1148.48	0.167992	0.0403093	4.16758	3.0785e-05	0.000718611
799	MSTRG.13465	479.249	-0.415528	0.0997651	-4.16506	3.11266e-05	0.000725678
800	MSTRG.8878	771.074	0.265647	0.0638118	4.16299	3.14111e-05	0.000731397
801	MSTRG.18368	51.3865	-1.16458	0.280106	-4.15763	3.21568e-05	0.000747826
802	MSTRG.10983	52.0284	-0.921403	0.221705	-4.15599	3.23878e-05	0.00075226
803	MSTRG.8824	1982.95	-0.185434	0.044637	-4.15427	3.2633e-05	0.000757013
804	MSTRG.12476	370.782	-0.534722	0.128759	-4.1529	3.28291e-05	0.000760616
805	MSTRG.6925	1919.08	-0.253734	0.0611565	-4.14894	3.34024e-05	0.000772938
806	MSTRG.16156	299.099	-0.317512	0.0766044	-4.14482	3.40082e-05	0.000785008
807	MSTRG.9154	670.958	-0.213088	0.0514072	-4.14509	3.39678e-05	0.000785008
808	MSTRG.5420	1122.81	-0.209472	0.0505609	-4.14297	3.42842e-05	0.000790402
809	MSTRG.21128	43.3668	-0.879115	0.212423	-4.13851	3.49573e-05	0.000804923
810	MSTRG.19645	12592.1	0.129403	0.0312734	4.1378	3.50659e-05	0.00080643
811	MSTRG.4585	370.588	-0.310965	0.075182	-4.13616	3.53159e-05	0.000811178
812	MSTRG.6994	5604.3	0.491267	0.118784	4.13581	3.53699e-05	0.000811419
813	MSTRG.9088	106.372	-0.887362	0.214659	-4.13382	3.56785e-05	0.000817493
814	MSTRG.15290	122547	-0.240704	0.0583086	-4.1281	3.65778e-05	0.000837069
815	MSTRG.5195	1085.2	-0.249894	0.0605673	-4.12589	3.69307e-05	0.000844088
816	MSTRG.6379	276.476	-0.43995	0.106639	-4.12561	3.6975e-05	0.000844088
817	MSTRG.23671	4534.68	0.194803	0.0472382	4.12385	3.72589e-05	0.00084953
818	MSTRG.14506	123.259	-0.960244	0.232942	-4.12225	3.75184e-05	0.000851497
819	MSTRG.17815	1759.46	-0.1941	0.0470807	-4.12272	3.74431e-05	0.000851497
820	MSTRG.18729	1399.26	0.251126	0.0609101	4.1229	3.74133e-05	0.000851497
821	MSTRG.8351	196.471	-0.445503	0.108074	-4.1222	3.75278e-05	0.000851497
822	MSTRG.1822	1798.5	-0.160215	0.0388854	-4.12018	3.78573e-05	0.00085793
823	MSTRG.23324	718.3	-0.225914	0.0548604	-4.11798	3.82201e-05	0.000865102
824	MSTRG.16982	504.037	-0.31537	0.0766116	-4.11648	3.84696e-05	0.000869692
825	MSTRG.12360	2394.6	0.20658	0.0502121	4.11416	3.886e-05	0.000877454
826	MSTRG.22703	166.721	-0.528335	0.128659	-4.10647	4.01744e-05	0.000906037
827	MSTRG.6009	1025.93	0.260006	0.0634811	4.0958	4.20718e-05	0.000947682
828	MSTRG.9228	241.024	0.495333	0.121095	4.09044	4.3056e-05	0.000968681
829	MSTRG.18153	103.379	0.463619	0.113554	4.08279	4.44983e-05	0.000999926
830	MSTRG.1947	2180.86	0.49679	0.121716	4.08156	4.47336e-05	0.00100341
831	MSTRG.2983	1077.85	-0.222272	0.0544595	-4.08142	4.47611e-05	0.00100341
832	MSTRG.17008	6797.93	0.147368	0.036215	4.06926	4.7162e-05	0.00105596
833	MSTRG.12932	73.0831	-1.00106	0.246093	-4.06781	4.74567e-05	0.00106129
834	MSTRG.21106	12.5221	-1.7814	0.438634	-4.06125	4.88108e-05	0.00109026
835	MSTRG.18352	515.945	0.224646	0.0553757	4.05677	4.97571e-05	0.00111007
836	MSTRG.20716	471.262	-0.320789	0.0791151	-4.05471	5.01967e-05	0.00111854
837	MSTRG.1127	477.957	0.313569	0.0774531	4.0485	5.15476e-05	0.00114614
838	MSTRG.2330	688.483	0.225527	0.0557071	4.04845	5.15583e-05	0.00114614
839	MSTRG.21594	2604.5	-0.228908	0.056588	-4.04516	5.2287e-05	0.00116096
840	MSTRG.12826	1279.82	-0.165282	0.040929	-4.03826	5.38502e-05	0.00119424
841	MSTRG.2346	254.403	0.37288	0.0923749	4.03659	5.42331e-05	0.00120131
842	MSTRG.21149	692.783	0.249326	0.0617887	4.03513	5.45713e-05	0.00120737
843	MSTRG.3772	1616.71	0.178116	0.0441448	4.03481	5.46459e-05	0.00120758
844	MSTRG.1796	719.519	-0.306557	0.0759957	-4.03388	5.48633e-05	0.00121095
845	MSTRG.22995	1780.25	0.157594	0.0391023	4.0303	5.57051e-05	0.00122808
846	MSTRG.18139	296.707	-0.397434	0.0986766	-4.02764	5.63402e-05	0.00123948
847	MSTRG.788	1454.82	0.154368	0.0383277	4.02757	5.63552e-05	0.00123948
848	MSTRG.19532	31.0562	-1.09073	0.271193	-4.02199	5.77097e-05	0.00126778
849	MSTRG.19493	7.52192	-4.37444	1.08848	-4.01886	5.84812e-05	0.00128322
850	MSTRG.5857	3430.54	-0.214997	0.0536064	-4.01067	6.0547e-05	0.00132698
851	MSTRG.7782	241.033	-0.432884	0.107966	-4.00943	6.08663e-05	0.00133241
852	MSTRG.3189	279.017	0.37783	0.0943249	4.00562	6.1856e-05	0.00135249
853	MSTRG.18574	646.643	-0.21514	0.053725	-4.00447	6.21571e-05	0.00135748
854	MSTRG.1415	22716.8	0.113514	0.0283705	4.00114	6.3038e-05	0.00137351
855	MSTRG.9746	229.227	0.336479	0.0840909	4.00137	6.29765e-05	0.00137351
856	MSTRG.4787	224.605	-0.396076	0.0990396	-3.99917	6.35652e-05	0.00138338
857	MSTRG.20578	584.692	-0.332098	0.0830889	-3.9969	6.41766e-05	0.00139506
858	MSTRG.4511	25.182	-1.451	0.364088	-3.98531	6.73918e-05	0.00146324
859	MSTRG.13449	2022.57	-0.145022	0.0363969	-3.98447	6.76312e-05	0.00146503
860	MSTRG.764	222.948	0.362368	0.0909411	3.98465	6.7581e-05	0.00146503
861	MSTRG.8183	1405.89	0.189731	0.0476217	3.98412	6.77295e-05	0.00146546
862	MSTRG.561	1470.05	-0.239261	0.0601262	-3.97932	6.91128e-05	0.0014925
863	MSTRG.6010	7948.12	-0.263888	0.0663164	-3.97923	6.91395e-05	0.0014925
864	MSTRG.252	250.868	0.316258	0.079636	3.97129	7.14843e-05	0.00154133
865	MSTRG.11345	42.0905	-0.843127	0.212782	-3.96241	7.41981e-05	0.001598
866	MSTRG.16109	306.833	-0.361576	0.0913286	-3.95907	7.52413e-05	0.0016186
867	MSTRG.11004	312.347	-0.430854	0.108872	-3.95744	7.57566e-05	0.00162781
868	MSTRG.22766	1349.78	0.194114	0.0490552	3.95705	7.58822e-05	0.00162863
869	MSTRG.2947	978.463	0.183915	0.0464916	3.95588	7.62535e-05	0.00163472
870	MSTRG.8746	1623.87	0.31516	0.0797739	3.95066	7.79345e-05	0.00166884
871	MSTRG.3517	15503.1	0.102362	0.0259304	3.94757	7.89472e-05	0.00168858
872	MSTRG.5807	1535.27	0.226321	0.0573631	3.94541	7.96646e-05	0.00170197
873	MSTRG.4296	8930.61	0.161138	0.0408701	3.9427	8.05705e-05	0.00171936
874	MSTRG.19780	1108.04	0.148755	0.0377497	3.94056	8.12913e-05	0.00173276
875	MSTRG.22720	4887.71	0.151965	0.0385856	3.93839	8.20298e-05	0.0017465
876	MSTRG.22683	1308.58	0.23839	0.0605465	3.93731	8.24018e-05	0.00175242
877	MSTRG.18737	1146.85	-0.183386	0.0466063	-3.93479	8.32704e-05	0.00176888
878	MSTRG.5705	51.2875	-0.784689	0.19964	-3.93053	8.47596e-05	0.00179847
879	MSTRG.21139	1580.36	-0.184075	0.046848	-3.92919	8.52334e-05	0.00180646
880	MSTRG.23304	39.4571	1.06309	0.270833	3.92527	8.66319e-05	0.00183402
881	MSTRG.18170	272.645	0.33354	0.0850363	3.92233	8.76982e-05	0.00185449
882	MSTRG.14368	1190.96	0.313103	0.0798698	3.92017	8.84847e-05	0.001869
883	MSTRG.14108	558.122	0.255859	0.0652725	3.91986	8.85989e-05	0.0018693
884	MSTRG.23446	1854.13	-0.224802	0.0573662	-3.91872	8.90188e-05	0.00187603
885	MSTRG.21524	1007.84	-0.200854	0.0512626	-3.91814	8.92363e-05	0.0018785
886	MSTRG.16162	107.984	-0.673287	0.171901	-3.91672	8.97625e-05	0.00188744
887	MSTRG.9642	130.082	0.416189	0.106294	3.91543	9.02421e-05	0.00189539
888	MSTRG.5435	1168.78	0.253416	0.0647504	3.91374	9.08761e-05	0.00190656
889	MSTRG.2489	1451.59	0.188354	0.0481496	3.91184	9.15945e-05	0.00191911
890	MSTRG.8865	836.987	0.177738	0.0454384	3.91162	9.168e-05	0.00191911
891	MSTRG.18133	1940.46	-0.230714	0.0589864	-3.91131	9.17951e-05	0.00191936
892	MSTRG.2680	237.421	-0.382324	0.0978093	-3.90888	9.27266e-05	0.00193667
893	MSTRG.6093	1984.63	0.178337	0.0456439	3.90714	9.33937e-05	0.00194842
894	MSTRG.20999	572.658	0.29035	0.074374	3.90392	9.46469e-05	0.00197236
895	MSTRG.7316	2958.75	0.233572	0.0599109	3.89865	9.67293e-05	0.0020135
896	MSTRG.2361	8363.06	0.195872	0.0502591	3.89725	9.72918e-05	0.00202295
897	MSTRG.16333	218.006	0.351603	0.0902339	3.89657	9.75644e-05	0.00202636
898	MSTRG.14124	19.1384	-1.46696	0.376623	-3.89503	9.81875e-05	0.00203704
899	MSTRG.17190	538.493	-0.39537	0.101691	-3.88795	0.000101093	0.00209499
900	MSTRG.21985	1911.58	-0.14356	0.0369488	-3.88538	0.000102169	0.00211494
901	MSTRG.6854	311.362	-0.336008	0.0865367	-3.88283	0.000103246	0.00213486
902	MSTRG.5447	449.604	-0.356294	0.0917706	-3.88244	0.000103414	0.00213597
903	MSTRG.17339	291.193	-0.389422	0.100324	-3.88166	0.000103747	0.00214047
904	MSTRG.10862	5578.97	0.103251	0.0266033	3.88111	0.000103979	0.00214289
905	MSTRG.10030	45.0235	0.98229	0.253186	3.87971	0.000104579	0.00215288
906	MSTRG.18925	1445.55	-0.170989	0.0441211	-3.87545	0.000106429	0.00218854
907	MSTRG.22164	418.746	-0.245555	0.063434	-3.87103	0.000108375	0.00222611
908	MSTRG.12582	797.615	0.329661	0.0851911	3.86967	0.000108982	0.00223611
909	MSTRG.5715	129.701	0.475625	0.122975	3.86767	0.000109882	0.00225211
910	MSTRG.23316	837.04	-0.203333	0.052579	-3.86718	0.000110101	0.0022541
911	MSTRG.13628	2888.88	0.159082	0.0412104	3.86025	0.000113269	0.00231642
912	MSTRG.23002	217.85	-0.351201	0.0910116	-3.85887	0.000113915	0.00232708
913	MSTRG.10061	1965.75	0.235514	0.0611753	3.84983	0.000118202	0.00241202
914	MSTRG.11603	1155.22	0.171324	0.0445304	3.84736	0.000119399	0.00243113
915	MSTRG.20259	337.024	0.296856	0.0771537	3.84759	0.000119285	0.00243113
916	MSTRG.12488	175.472	-0.538683	0.140288	-3.83984	0.000123116	0.00250407
917	MSTRG.8353	737.331	-0.227434	0.0592461	-3.8388	0.000123635	0.00251189
918	MSTRG.1221	1011.32	-0.216058	0.0564569	-3.82695	0.000129741	0.00263308
919	MSTRG.12849	636.093	-0.223884	0.0585147	-3.82611	0.000130182	0.00263916
920	MSTRG.22236	1004.46	-0.202887	0.053148	-3.8174	0.000134865	0.00273112
921	MSTRG.23314	29.3737	-1.09499	0.286969	-3.8157	0.000135798	0.00274704
922	MSTRG.16850	502.692	0.253287	0.0666126	3.80239	0.000143307	0.0028958
923	MSTRG.2267	5065.97	0.170772	0.0449613	3.79821	0.000145747	0.00294191
924	MSTRG.8476	289.943	-0.343546	0.0905039	-3.79593	0.00014709	0.00296581
925	MSTRG.17068	168.091	0.380707	0.100306	3.79546	0.000147368	0.00296821
926	MSTRG.7010	3746.57	-0.218376	0.057544	-3.79494	0.000147678	0.00297124
927	MSTRG.13057	819.01	-0.229362	0.0604504	-3.79422	0.000148106	0.00297665
928	MSTRG.23271	492.874	0.276017	0.0728162	3.7906	0.000150284	0.00301716
929	MSTRG.19099	53.8519	-0.77412	0.204478	-3.78583	0.000153196	0.00307231
930	MSTRG.15788	5622.11	0.141368	0.0373554	3.7844	0.000154077	0.00308667
931	MSTRG.21399	4994.69	-0.130783	0.0345676	-3.7834	0.000154701	0.00309584
932	MSTRG.14105	1243.05	-0.221565	0.0585769	-3.78247	0.000155282	0.00310415
933	MSTRG.5033	610.025	-0.38014	0.100541	-3.78094	0.000156236	0.00311987
934	MSTRG.15915	79.8193	0.505375	0.133726	3.77917	0.000157351	0.00313542
935	MSTRG.20143	19744	0.135209	0.0357763	3.7793	0.00015727	0.00313542
936	MSTRG.3967	949.552	-0.293421	0.0776769	-3.77746	0.000158437	0.0031537
937	MSTRG.13216	1697.66	-0.273377	0.0723892	-3.77649	0.000159052	0.00316256
938	MSTRG.6359	103.869	-0.807089	0.213857	-3.77397	0.000160671	0.00319135
939	MSTRG.18813	16.71	-1.21098	0.321099	-3.77138	0.000162349	0.00322124
940	MSTRG.15620	20102.1	0.137008	0.0363614	3.76796	0.000164588	0.00325874
941	MSTRG.8674	494.078	0.227161	0.0602862	3.76804	0.000164534	0.00325874
942	MSTRG.3462	18.0492	-1.29421	0.343575	-3.76689	0.000165291	0.00326573
943	MSTRG.6863	2840.06	0.180147	0.0478221	3.76702	0.000165211	0.00326573
944	MSTRG.3008	966.995	-0.361563	0.096118	-3.76165	0.000168793	0.00333139
945	MSTRG.11777	190.566	0.441534	0.117426	3.76012	0.000169834	0.00334838
946	MSTRG.8761	316.314	0.463589	0.123345	3.75848	0.000170946	0.00336675
947	MSTRG.23119	2496.82	-0.31993	0.0851904	-3.75547	0.000173014	0.00340388
948	MSTRG.3263	119.096	-0.514117	0.136916	-3.75497	0.000173363	0.00340715
949	MSTRG.17528	925.658	-0.34006	0.090586	-3.754	0.000174034	0.00341675
950	MSTRG.8206	34.4477	0.76873	0.20485	3.75265	0.000174974	0.0034316
951	MSTRG.8051	14557.1	0.203349	0.0542092	3.75119	0.000176	0.00344808
952	MSTRG.21606	70.0001	-0.646577	0.17239	-3.75067	0.000176366	0.00345163
953	MSTRG.122	87.4704	-0.609108	0.162463	-3.7492	0.000177397	0.00346817
954	MSTRG.13103	866.045	0.227104	0.0606635	3.74367	0.000181354	0.00354182
955	MSTRG.10428	831.517	-0.240697	0.0643807	-3.73866	0.000185005	0.00360557
956	MSTRG.16979	23531.8	0.106844	0.028578	3.73868	0.00018499	0.00360557
957	MSTRG.152	532.882	-0.309497	0.0828416	-3.73601	0.000186963	0.00363993
958	MSTRG.18924	2849.81	-0.200748	0.0537755	-3.73307	0.000189161	0.00367888
959	MSTRG.19877	77.5457	0.553962	0.148492	3.73059	0.000191031	0.00371137
960	MSTRG.1050	15125.6	0.129753	0.0348037	3.72815	0.000192887	0.00374353
961	MSTRG.14521	205.645	-0.40964	0.110057	-3.72208	0.000197588	0.00383078
962	MSTRG.13802	12.0255	-1.3126	0.353113	-3.71722	0.000201425	0.00390112
963	MSTRG.9863	2411.26	0.137931	0.0371304	3.71477	0.000203389	0.00393508
964	MSTRG.3475	628.245	0.258777	0.0697889	3.708	0.000208904	0.00403758
965	MSTRG.15242	2059.72	0.149237	0.0402582	3.70699	0.000209736	0.00404529
966	MSTRG.3446	81.3368	0.539444	0.145511	3.70724	0.000209532	0.00404529
967	MSTRG.21646	3699.03	0.226633	0.0611864	3.70398	0.000212246	0.00408946
968	MSTRG.16754	1550.12	0.18204	0.0491646	3.70267	0.000213339	0.00410343
969	MSTRG.7688	533.66	-0.277919	0.0750606	-3.70259	0.000213411	0.00410343
970	MSTRG.22029	995.782	-0.309042	0.0835144	-3.70046	0.000215208	0.00413372
971	MSTRG.21334	20.2889	-1.90925	0.516075	-3.69956	0.000215974	0.00414387
972	MSTRG.248	64.4843	-0.676204	0.182792	-3.69932	0.000216181	0.00414387
973	MSTRG.2696	199.826	0.32864	0.088852	3.69873	0.000216682	0.00414921
974	MSTRG.76	18292.7	0.123909	0.0335589	3.69229	0.00022224	0.00425128
975	MSTRG.12118	446.757	-0.319684	0.0866254	-3.69043	0.000223879	0.00427497
976	MSTRG.19804	13311.3	0.207908	0.0563382	3.69036	0.000223937	0.00427497
977	MSTRG.22998	465.511	-0.23968	0.065065	-3.68371	0.000229868	0.0043837
978	MSTRG.4556	10.5294	-2.55716	0.694806	-3.68039	0.000232874	0.00443649
979	MSTRG.11294	23300.6	0.15048	0.0409004	3.67917	0.000233995	0.0044533
980	MSTRG.14133	1851.53	-0.225319	0.0612574	-3.67823	0.000234854	0.00446509
981	MSTRG.6993	7371.19	0.448248	0.12189	3.67748	0.000235553	0.00447382
982	MSTRG.10981	224.772	-0.429594	0.116874	-3.67569	0.000237208	0.00450067
983	MSTRG.5061	5719	-0.148349	0.040364	-3.67527	0.000237601	0.00450355
984	MSTRG.22878	164.759	0.648912	0.176586	3.67476	0.000238071	0.00450789
985	MSTRG.3785	79.5335	-0.528817	0.144081	-3.67028	0.000242284	0.004583
986	MSTRG.8574	363.39	-0.254911	0.0695115	-3.66718	0.000245236	0.00463415
987	MSTRG.1173	10.6743	-1.89023	0.515735	-3.66512	0.000247227	0.00466704
988	MSTRG.4142	6255.72	0.127582	0.0348224	3.6638	0.000248504	0.00468641
989	MSTRG.6442	1147.97	-0.162063	0.0442381	-3.66341	0.000248875	0.00468865
990	MSTRG.7355	10769.8	0.145301	0.0397116	3.65892	0.000253283	0.00476689
991	MSTRG.20057	3518.19	0.128403	0.0350969	3.65851	0.000253683	0.0047696
992	MSTRG.269	117.127	0.448776	0.122684	3.65799	0.000254204	0.00477457
993	MSTRG.8217	4023.27	-0.742029	0.202909	-3.65696	0.000255223	0.0047889
994	MSTRG.23329	704.774	-0.285914	0.0782207	-3.65522	0.000256958	0.0048166
995	MSTRG.14517	117.853	-0.501429	0.137359	-3.6505	0.000261728	0.00490109
996	MSTRG.22367	236.091	0.392034	0.10744	3.64885	0.000263414	0.00492772
997	MSTRG.14264	549.737	-0.239706	0.0656993	-3.64854	0.000263738	0.00492883
998	MSTRG.19208	234.807	-1.26128	0.346029	-3.64502	0.000267373	0.00499176
999	MSTRG.17452	847.76	0.209263	0.0574657	3.64153	0.000271023	0.00505485
1000	MSTRG.22431	1791.31	0.178961	0.0491593	3.64043	0.000272179	0.00507134
1001	MSTRG.821	3111.9	0.137464	0.0377949	3.63711	0.000275711	0.00513202
1002	MSTRG.15714	715.917	-0.226681	0.0623702	-3.63444	0.00027858	0.00518026
1003	MSTRG.13781	11.1744	-4.06482	1.11879	-3.63322	0.00027991	0.00519981
1004	MSTRG.2447	1695.97	0.179259	0.049364	3.63138	0.000281911	0.00522953
1005	MSTRG.5073	678.422	0.247892	0.0682666	3.63123	0.000282071	0.00522953
1006	MSTRG.4587	57.6273	-0.630069	0.173584	-3.62977	0.000283678	0.0052541
1007	MSTRG.5675	234.578	-0.400013	0.110381	-3.62393	0.000290165	0.00536891
1008	MSTRG.3869	379.643	0.461193	0.12728	3.62345	0.000290697	0.00537343
1009	MSTRG.23542	129.347	-0.629533	0.174017	-3.61765	0.000297296	0.00548996
1010	MSTRG.2721	4216.32	0.107332	0.0296846	3.61574	0.000299485	0.00552493
1011	MSTRG.6273	974.826	-0.196338	0.0543161	-3.61472	0.000300667	0.00554125
1012	MSTRG.16249	167.102	-0.379346	0.105024	-3.61198	0.000303865	0.00559465
1013	MSTRG.19330	410.625	0.386513	0.107075	3.60976	0.000306484	0.00563732
1014	MSTRG.6170	89.9534	0.461697	0.127939	3.60873	0.000307701	0.00565412
1015	MSTRG.22874	605.914	-0.23044	0.0638767	-3.60757	0.00030908	0.00567388
1016	MSTRG.23303	855.24	0.238265	0.066066	3.60647	0.000310385	0.00569222
1017	MSTRG.20120	641.538	-0.520055	0.144305	-3.60385	0.000313536	0.00574437
1018	MSTRG.19016	315.513	-0.282937	0.0785733	-3.60092	0.000317088	0.00579805
1019	MSTRG.6098	629.455	0.290483	0.0806636	3.60117	0.000316792	0.00579805
1020	MSTRG.7123	239.209	-0.301073	0.0836484	-3.59927	0.000319112	0.00582934
1021	MSTRG.22673	1292.69	0.143777	0.039959	3.59811	0.000320538	0.00584967
1022	MSTRG.18243	386.461	-0.268245	0.0745868	-3.59642	0.000322632	0.00588213
1023	MSTRG.14806	267.258	-0.324186	0.0901513	-3.59602	0.00032312	0.00588526
1024	MSTRG.13291	502.62	0.228809	0.0636658	3.59391	0.000325756	0.0059221
1025	MSTRG.23662	4946.97	0.201554	0.0560863	3.59364	0.000326095	0.0059221
1026	MSTRG.4880	976.833	0.210804	0.0586567	3.59387	0.000325803	0.0059221
1027	MSTRG.8742	775.168	0.286243	0.079727	3.59029	0.000330315	0.0059929
1028	MSTRG.13845	1261.69	-0.201828	0.0562238	-3.58973	0.000331019	0.00599984
1029	MSTRG.20385	7302.73	0.131968	0.0367858	3.58747	0.000333905	0.00604628
1030	MSTRG.15703	1969.64	-0.240436	0.067035	-3.58673	0.00033485	0.00605751
1031	MSTRG.15917	3065.32	0.112963	0.0315107	3.58489	0.000337217	0.00607378
1032	MSTRG.16847	11899.6	-0.231786	0.064644	-3.58557	0.000336339	0.00607378
1033	MSTRG.20894	138.351	0.420142	0.117202	3.58477	0.000337378	0.00607378
1034	MSTRG.3536	1370.45	-0.164375	0.0458488	-3.58515	0.000336887	0.00607378
1035	MSTRG.4501	757.918	0.206062	0.0574798	3.58494	0.000337151	0.00607378
1036	MSTRG.13825	39.9178	1.44117	0.402437	3.58111	0.000342131	0.00615342
1037	MSTRG.8200	665.875	0.199626	0.0558397	3.57499	0.000350248	0.00629333
1038	MSTRG.10058	501.165	0.2104	0.058861	3.57452	0.000350872	0.00629469
1039	MSTRG.8757	259.381	0.304798	0.0852719	3.57442	0.000350998	0.00629469
1040	MSTRG.1739	131.233	-0.446265	0.124878	-3.57362	0.000352077	0.00630796
1041	MSTRG.15313	115.326	-0.604729	0.169242	-3.57316	0.000352699	0.00631304
1042	MSTRG.2785	2433.97	0.172969	0.0484377	3.57096	0.000355669	0.0063601
1043	MSTRG.16430	83.0299	-0.498749	0.139721	-3.5696	0.000357524	0.00638715
1044	MSTRG.19449	195.393	-0.324817	0.0910605	-3.56705	0.000361028	0.00644358
1045	MSTRG.20865	87.9631	0.681467	0.191074	3.56651	0.000361765	0.00645056
1046	MSTRG.16860	689.5	-0.200144	0.0561262	-3.56596	0.000362524	0.00645792
1047	MSTRG.3474	426.012	-0.287602	0.0807596	-3.56122	0.000369143	0.00656954
1048	MSTRG.5678	175.952	0.333851	0.0937765	3.56007	0.000370754	0.00659194
1049	MSTRG.10979	394.447	-0.264438	0.0743001	-3.55906	0.00037219	0.00660163
1050	MSTRG.11129	561.507	-0.286725	0.0805636	-3.55899	0.000372287	0.00660163
1051	MSTRG.7458	111.777	0.427943	0.120245	3.55894	0.000372361	0.00660163
1052	MSTRG.19060	829.362	0.174234	0.0489631	3.55847	0.000373016	0.00660695
1053	MSTRG.21809	28.1291	0.881377	0.247707	3.55815	0.000373474	0.00660879
1054	MSTRG.6035	293.013	-0.285968	0.0804151	-3.55615	0.000376329	0.00665299
1055	MSTRG.21538	1647.9	0.201337	0.0566251	3.55561	0.000377104	0.00666038
1056	MSTRG.38	1254.6	-0.183977	0.0517643	-3.55413	0.000379229	0.00669158
1057	MSTRG.12517	1262.07	0.174193	0.0490249	3.55316	0.000380639	0.00671011
1058	MSTRG.10321	1079.53	0.185657	0.0523017	3.54973	0.000385621	0.00679152
1059	MSTRG.5518	547.832	-0.213499	0.0602134	-3.5457	0.000391577	0.00688991
1060	MSTRG.15020	6.69789	-2.13056	0.601068	-3.54462	0.000393178	0.00690713
1061	MSTRG.19556	18.2361	-1.08692	0.306646	-3.54454	0.000393296	0.00690713
1062	MSTRG.19604	1647.37	0.214239	0.0604866	3.54192	0.000397224	0.00696954
1063	MSTRG.7002	18.1735	1.1748	0.331748	3.54124	0.000398244	0.00698087
1064	MSTRG.16922	2290.31	-0.141903	0.0400974	-3.53896	0.000401709	0.0070298
1065	MSTRG.8030	1214.99	-0.199739	0.0564409	-3.53891	0.000401789	0.0070298
1066	MSTRG.12770	862.259	0.177433	0.0501467	3.53828	0.000402739	0.00703982
1067	MSTRG.20941	1688.09	0.188866	0.053437	3.53437	0.00040875	0.00713819
1068	MSTRG.6788	920.655	0.208127	0.0589312	3.5317	0.000412896	0.00720385
1069	MSTRG.11923	4740.66	0.173127	0.049034	3.53076	0.00041437	0.00722224
1070	MSTRG.5908	719.125	0.200228	0.0567134	3.53053	0.000414724	0.00722224
1071	MSTRG.7444	1672.13	0.155664	0.0441855	3.52296	0.000426751	0.00742475
1072	MSTRG.14118	812.885	-0.184911	0.0525726	-3.51724	0.000436056	0.00757958
1073	MSTRG.7996	870.976	-0.294322	0.0837344	-3.51494	0.000439847	0.00763834
1074	MSTRG.160	120.323	0.402168	0.114465	3.51347	0.000442288	0.0076736
1075	MSTRG.13618	227.971	0.306844	0.0873551	3.51261	0.000443726	0.00769139
1076	MSTRG.13589	233.971	-0.327595	0.093344	-3.50955	0.000448867	0.00776062
1077	MSTRG.8565	371.408	0.243302	0.0693269	3.50949	0.000448968	0.00776062
1078	MSTRG.9607	631.845	-0.214015	0.0609747	-3.5099	0.000448277	0.00776062
1079	MSTRG.13318	95.696	-0.541336	0.154344	-3.50734	0.000452611	0.00781635
1080	MSTRG.3895	558.183	-0.288848	0.0823655	-3.5069	0.000453354	0.00782194
1081	MSTRG.12492	316.648	-0.400859	0.114397	-3.50411	0.00045814	0.00789719
1082	MSTRG.22452	20515.2	0.137554	0.0392707	3.50272	0.00046053	0.00793106
1083	MSTRG.2482	78.9627	-0.722338	0.206272	-3.50187	0.000462004	0.00794911
1084	MSTRG.11770	672.319	-0.236137	0.0674969	-3.49849	0.000467903	0.00804319
1085	MSTRG.22133	421.364	-0.266662	0.0762534	-3.49706	0.000470425	0.00807909
1086	MSTRG.4334	4088.95	0.126071	0.0360561	3.49653	0.000471358	0.00808767
1087	MSTRG.7185	892.311	0.182362	0.0522167	3.49241	0.000478679	0.00820574
1088	MSTRG.17666	15.258	1.14765	0.328657	3.49193	0.000479539	0.00821294
1089	MSTRG.21753	181.881	0.337991	0.0968066	3.4914	0.000480497	0.00822179
1090	MSTRG.19633	137407	0.168467	0.0483057	3.48752	0.000487516	0.00833425
1091	MSTRG.15949	840.087	0.245161	0.0703097	3.48687	0.000488702	0.00834686
1092	MSTRG.17667	61.7899	0.597048	0.1714	3.48337	0.000495146	0.00844919
1093	MSTRG.19056	201.586	0.369973	0.106292	3.48073	0.000500048	0.00851726
1094	MSTRG.7361	1058.02	-0.179319	0.0515159	-3.48085	0.000499826	0.00851726
1095	MSTRG.7046	264.098	-0.271995	0.0781507	-3.48039	0.000500679	0.00852023
1096	MSTRG.23302	49.2921	-1.01941	0.293136	-3.47762	0.000505884	0.00860095
1097	MSTRG.375	2013.04	-0.157245	0.0452265	-3.47684	0.000507364	0.00861825
1098	MSTRG.13201	611.505	0.226741	0.0652717	3.4738	0.000513149	0.00869715
1099	MSTRG.20061	577.614	-0.295745	0.0851391	-3.47366	0.000513408	0.00869715
1100	MSTRG.2976	4312.89	-0.11843	0.0340913	-3.4739	0.000512949	0.00869715
1101	MSTRG.15583	874.944	0.169863	0.0489133	3.47275	0.00051516	0.00871891
1102	MSTRG.21300	968.455	0.1736	0.0499984	3.47212	0.000516371	0.00873149
1103	MSTRG.20086	2082.74	0.198775	0.0572734	3.47064	0.000519224	0.00877178
1104	MSTRG.20174	26.7148	-0.965557	0.278265	-3.46992	0.000520608	0.0087872
1105	MSTRG.4885	160.053	0.481348	0.138733	3.46961	0.000521214	0.00878947
1106	MSTRG.15244	212.862	-0.373488	0.107656	-3.46929	0.00052184	0.00879209
1107	MSTRG.12240	1243.42	0.220005	0.0634503	3.46736	0.000525601	0.00884746
1108	MSTRG.12123	18.9331	1.14542	0.330434	3.46641	0.000527454	0.00887064
1109	MSTRG.21864	569.44	0.282253	0.0814354	3.46598	0.00052831	0.00887704
1110	MSTRG.14165	111.079	-0.474942	0.13706	-3.4652	0.000529828	0.00889452
1111	MSTRG.19477	3714.56	0.208917	0.0603727	3.46046	0.000539258	0.0090447
1112	MSTRG.20685	359.263	0.250171	0.0723412	3.45821	0.000543783	0.0091124
1113	MSTRG.18738	968.16	-0.212595	0.0615326	-3.455	0.000550293	0.00921322
1114	MSTRG.14758	238.437	0.310316	0.0898709	3.4529	0.000554588	0.00927348
1115	MSTRG.19157	351.009	-0.476508	0.138008	-3.45276	0.000554887	0.00927348
1116	MSTRG.9917	712.567	-0.271004	0.0785004	-3.45226	0.000555912	0.00928229
1117	MSTRG.19114	53.6097	-0.985991	0.285905	-3.44866	0.000563372	0.00939844
1118	MSTRG.310	739.313	0.169296	0.0491039	3.4477	0.000565379	0.00942349
1119	MSTRG.5547	165.924	-0.394199	0.114383	-3.4463	0.000568316	0.00946398
1120	MSTRG.15857	6005.31	0.114391	0.0332056	3.44494	0.000571191	0.00950337
1121	MSTRG.3314	9567.53	0.127681	0.0370735	3.44399	0.0005732	0.00952831
1122	MSTRG.233	10506.5	0.153263	0.0445466	3.44051	0.000580616	0.00964298
1123	MSTRG.18241	762.58	-0.232496	0.067599	-3.43934	0.000583128	0.00967609
1124	MSTRG.17166	41.0494	-0.67666	0.196778	-3.43869	0.000584538	0.00969086
1125	MSTRG.17690	1036.36	-0.229926	0.0669316	-3.43524	0.000592029	0.00980633
1126	MSTRG.14493	1059.99	0.222757	0.0649018	3.43221	0.000598686	0.0099078
1127	MSTRG.9497	1929.24	0.153438	0.0447174	3.43128	0.00060075	0.00993315
1128	MSTRG.306	3529.22	0.152658	0.0445029	3.43028	0.000602954	0.00996075
1129	MSTRG.11104	475.939	-0.293457	0.0855663	-3.42959	0.000604494	0.00996855
1130	MSTRG.11398	517.171	-0.209997	0.0612279	-3.42975	0.000604134	0.00996855
1131	MSTRG.12520	980.743	-0.173342	0.0505501	-3.42912	0.000605544	0.00997704
1132	MSTRG.11057	525.634	-0.221589	0.064645	-3.42778	0.000608539	0.0100175
1133	MSTRG.4006	1894.03	-0.160857	0.0469613	-3.42532	0.000614073	0.0100997
1134	MSTRG.6959	401.626	-0.36233	0.105844	-3.42325	0.000618763	0.0101679
1135	MSTRG.22999	913.676	0.149262	0.0436199	3.42188	0.000621905	0.0102105
1136	MSTRG.5222	240.144	-0.279122	0.0815776	-3.42155	0.000622654	0.0102138
1137	MSTRG.2425	3849.84	0.133088	0.0389169	3.4198	0.000626668	0.0102706
1138	MSTRG.11464	10.815	-1.72183	0.503594	-3.41909	0.000628314	0.0102795
1139	MSTRG.5869	3763.85	0.148114	0.043317	3.4193	0.000627816	0.0102795
1140	MSTRG.3933	1715.27	-0.170514	0.0498925	-3.41762	0.000631705	0.010326
1141	MSTRG.11094	6501.17	0.167672	0.0490869	3.41582	0.000635905	0.0103855
1142	MSTRG.2036	177.614	0.30511	0.0893782	3.4137	0.000640877	0.0104576
1143	MSTRG.22806	41.7935	-0.934582	0.274052	-3.41024	0.000649054	0.0105817
1144	MSTRG.17028	206.965	-0.300833	0.0882804	-3.4077	0.000655131	0.0106715
1145	MSTRG.8458	1962.5	-0.171083	0.0502275	-3.40615	0.000658856	0.0107228
1146	MSTRG.15707	48.2033	-0.640335	0.188035	-3.4054	0.000660676	0.010743
1147	MSTRG.7834	3194.32	0.105615	0.0310333	3.40329	0.000665786	0.0108167
1148	MSTRG.17100	15.5311	1.11388	0.327577	3.40035	0.000673006	0.0109245
1149	MSTRG.15202	75.5882	1.00363	0.295193	3.39991	0.000674068	0.0109322
1150	MSTRG.18540	722.473	-0.222786	0.0655575	-3.39833	0.000677996	0.0109864
1151	MSTRG.944	1836.29	0.139265	0.0409915	3.39741	0.000680281	0.0110138
1152	MSTRG.2561	910.275	0.163215	0.0480532	3.39656	0.000682398	0.0110385
1153	MSTRG.202	691.864	-0.178698	0.0526544	-3.39378	0.000689351	0.0111413
1154	MSTRG.12232	1124.59	0.176386	0.0519936	3.39245	0.000692697	0.0111857
1155	MSTRG.13753	3387.44	0.167668	0.0494807	3.38855	0.00070264	0.0113365
1156	MSTRG.7350	813.576	0.224591	0.0663049	3.38725	0.000705968	0.0113803
1157	MSTRG.20953	451.89	-0.225494	0.0666061	-3.38549	0.000710505	0.0114436
1158	MSTRG.14189	1613.99	-0.251274	0.0742279	-3.38517	0.000711336	0.0114471
1159	MSTRG.13717	8490.49	0.115959	0.0342708	3.38361	0.000715389	0.0114924
1160	MSTRG.15178	434.6	0.250132	0.0739241	3.38363	0.000715353	0.0114924
1161	MSTRG.21175	4457.4	-0.27392	0.0810258	-3.38065	0.000723159	0.0116073
1162	MSTRG.6632	7554.54	0.140188	0.041485	3.37924	0.00072686	0.0116566
1163	MSTRG.4612	47.2036	-1.29634	0.384596	-3.37066	0.00074989	0.0120156
1164	MSTRG.12204	233.941	-0.309848	0.0919784	-3.36871	0.000755216	0.0120906
1165	MSTRG.17653	4147.55	0.169154	0.0502356	3.36722	0.000759309	0.0121358
1166	MSTRG.6148	3338.44	-0.185055	0.0549579	-3.3672	0.000759343	0.0121358
1167	MSTRG.2368	4311.01	0.239286	0.0711092	3.36505	0.000765307	0.0122207
1168	MSTRG.8868	6.91894	-2.80519	0.833836	-3.36419	0.000767676	0.012248
1169	MSTRG.13594	14.6186	-3.41619	1.01653	-3.36064	0.000777608	0.0123799
1170	MSTRG.16317	9594.06	0.15302	0.0455346	3.36053	0.000777932	0.0123799
1171	MSTRG.21826	909.877	0.151392	0.0450456	3.36087	0.000776983	0.0123799
1172	MSTRG.1229	971.203	0.192469	0.0573035	3.35877	0.000782912	0.0124273
1173	MSTRG.2751	38.4216	0.664106	0.197712	3.35897	0.000782349	0.0124273
1174	MSTRG.643	542.972	0.270378	0.0804891	3.35918	0.000781727	0.0124273
1175	MSTRG.21227	930.892	0.170361	0.0507443	3.35724	0.000787245	0.0124855
1176	MSTRG.12878	1637.61	-0.14049	0.0418635	-3.3559	0.000791058	0.0125246
1177	MSTRG.14913	548.035	-0.188352	0.0561245	-3.35598	0.000790853	0.0125246
1178	MSTRG.9319	532.108	-0.272378	0.0811941	-3.35466	0.000794638	0.0125706
1179	MSTRG.9336	10863.5	0.140816	0.0420212	3.35107	0.000805005	0.0127239
1180	MSTRG.488	497.307	-0.234225	0.0699022	-3.35076	0.0008059	0.0127272
1181	MSTRG.5339	1147.22	0.16399	0.0489925	3.34724	0.000816202	0.012879
1182	MSTRG.7741	46.5381	-0.803261	0.240005	-3.34686	0.000817336	0.012886
1183	MSTRG.12538	87.6074	-0.515961	0.15425	-3.34496	0.000822937	0.0129633
1184	MSTRG.3363	955.095	-0.218155	0.0652358	-3.3441	0.000825498	0.0129927
1185	MSTRG.19664	314.656	-0.274235	0.0821088	-3.3399	0.000838093	0.0131798
1186	MSTRG.10412	24.1672	0.956392	0.286394	3.33943	0.00083951	0.0131851
1187	MSTRG.8738	259.949	0.524048	0.156933	3.33932	0.000839845	0.0131851
1188	MSTRG.16902	13048.8	0.232164	0.069548	3.33818	0.000843292	0.0132281
1189	MSTRG.13383	1202.95	0.175256	0.0525716	3.33367	0.000857089	0.0134333
1190	MSTRG.13055	1469.39	0.158515	0.0475532	3.33342	0.000857849	0.0134339
1191	MSTRG.13878	9.87645	-1.98789	0.59712	-3.32913	0.000871177	0.0136312
1192	MSTRG.1898	1169.66	-0.185013	0.055602	-3.32744	0.000876468	0.0137024
1193	MSTRG.15253	105.871	-0.660016	0.198391	-3.32685	0.00087834	0.0137177
1194	MSTRG.736	1768.36	-0.15284	0.045944	-3.32667	0.000878916	0.0137177
1195	MSTRG.3360	4419.44	0.118338	0.0355865	3.32537	0.000883009	0.0137586
1196	MSTRG.6804	8045	0.135721	0.0408113	3.32556	0.000882397	0.0137586
1197	MSTRG.3751	178.616	-0.41006	0.12333	-3.3249	0.000884517	0.0137706
1198	MSTRG.14548	110.403	-0.393429	0.118366	-3.32382	0.000887928	0.0138121
1199	MSTRG.1640	903.349	-0.197319	0.0594169	-3.32093	0.000897182	0.0139445
1200	MSTRG.21595	887.4	-0.199714	0.0601801	-3.31861	0.000904679	0.0140493
1201	MSTRG.2669	522.94	-0.248216	0.0748113	-3.31789	0.000907006	0.0140737
1202	MSTRG.5548	1979.77	0.14916	0.044984	3.31585	0.000913635	0.0141648
1203	MSTRG.15592	747.296	0.171221	0.0516537	3.31479	0.000917132	0.0142072
1204	MSTRG.11811	776.001	0.170985	0.0516165	3.31261	0.000924312	0.0143065
1205	MSTRG.10156	2410.9	0.142212	0.0429898	3.30804	0.000939514	0.0145297
1206	MSTRG.4607	818.641	-0.170975	0.051699	-3.30711	0.000942624	0.0145658
1207	MSTRG.3582	557.319	0.228863	0.0692307	3.3058	0.00094706	0.0146222
1208	MSTRG.11985	15579.4	0.128474	0.0388898	3.30353	0.000954747	0.0147165
1209	MSTRG.18279	129120	0.0966819	0.0292659	3.30357	0.000954606	0.0147165
1210	MSTRG.21531	177.059	-0.503742	0.152577	-3.30156	0.000961478	0.014808
1211	MSTRG.8719	269.548	-0.290375	0.088019	-3.29901	0.000970278	0.0149312
1212	MSTRG.22562	27983.1	0.117143	0.0355152	3.29838	0.00097243	0.014952
1213	MSTRG.613	329.15	-0.274738	0.0834506	-3.29223	0.000993979	0.0152708
1214	MSTRG.1604	368.049	0.257394	0.0782082	3.29113	0.000997846	0.0153175
1215	MSTRG.10073	21.0432	-1.08304	0.329153	-3.29038	0.00100054	0.0153462
1216	MSTRG.22251	11956.4	0.119567	0.0363455	3.28973	0.00100283	0.0153601
1217	MSTRG.6911	415.031	-0.252176	0.0766572	-3.28966	0.00100309	0.0153601
1218	MSTRG.8314	199.191	-0.337552	0.102736	-3.28562	0.00101757	0.015569
1219	MSTRG.16565	153.325	-0.327338	0.0996713	-3.28417	0.00102283	0.0156367
1220	MSTRG.6992	53.5373	-1.0143	0.308886	-3.28373	0.00102442	0.0156482
1221	MSTRG.5241	536.657	0.204733	0.06236	3.28309	0.00102676	0.0156712
1222	MSTRG.11083	31926	0.195683	0.059624	3.28196	0.00103089	0.0157213
1223	MSTRG.1952	142.951	-0.462444	0.141047	-3.27865	0.00104303	0.0158935
1224	MSTRG.17471	8.44284	-1.7143	0.523244	-3.27629	0.00105179	0.0160008
1225	MSTRG.798	31692.1	0.205158	0.0626176	3.27636	0.00105155	0.0160008
1226	MSTRG.4181	366.621	0.361545	0.110444	3.27356	0.00106204	0.0161435
1227	MSTRG.16911	1989.52	0.129893	0.0397149	3.27065	0.00107302	0.0162839
1228	MSTRG.9337	497.327	0.238522	0.072927	3.2707	0.00107283	0.0162839
1229	MSTRG.820	10.4472	1.08159	0.331022	3.26743	0.0010853	0.0164569
1230	MSTRG.8256	319.517	-0.293636	0.0898857	-3.26677	0.00108784	0.0164819
1231	MSTRG.12514	73.6308	-0.632339	0.193682	-3.26483	0.00109532	0.0165818
1232	MSTRG.1046	1657.13	0.153493	0.047031	3.26365	0.00109987	0.0166292
1233	MSTRG.19666	430.533	0.255309	0.0782303	3.26356	0.00110023	0.0166292
1234	MSTRG.15803	1237.35	0.150473	0.0461315	3.26182	0.00110698	0.0167077
1235	MSTRG.4247	1123.69	0.165416	0.0507135	3.26176	0.00110721	0.0167077
1236	MSTRG.8559	6152.62	0.126535	0.0388027	3.26098	0.00111028	0.0167403
1237	MSTRG.18748	334.213	-0.298414	0.0915275	-3.26037	0.00111267	0.0167628
1238	MSTRG.9834	15.4975	-1.10406	0.338815	-3.25859	0.00111966	0.0168545
1239	MSTRG.8521	267.915	0.305142	0.0936574	3.25806	0.00112175	0.0168725
1240	MSTRG.16801	1313.85	0.184814	0.0567403	3.25719	0.00112522	0.016911
1241	MSTRG.20542	20658.9	0.125735	0.0386786	3.25076	0.00115096	0.0172839
1242	MSTRG.5392	534.455	0.19434	0.0598092	3.24934	0.00115674	0.0173567
1243	MSTRG.7844	107.812	-0.479996	0.147778	-3.24809	0.00116183	0.017419
1244	MSTRG.20836	53.2526	-1.5423	0.475005	-3.2469	0.00116668	0.0174777
1245	MSTRG.6274	16.6703	-1.17804	0.362955	-3.24568	0.00117171	0.0175389
1246	MSTRG.1983	1055.27	0.246584	0.075999	3.24458	0.00117626	0.017593
1247	MSTRG.7334	45212.7	0.0991032	0.0305485	3.24413	0.0011781	0.0176063
1248	MSTRG.14290	616.165	0.237342	0.0731932	3.24268	0.0011841	0.0176819
1249	MSTRG.18709	1711.41	0.197285	0.0608853	3.24027	0.00119418	0.0178038
1250	MSTRG.635	7836.42	0.104459	0.0322378	3.24027	0.00119417	0.0178038
1251	MSTRG.9798	1093.3	-0.171507	0.0529591	-3.23847	0.00120171	0.0179019
1252	MSTRG.9515	1996.05	0.132912	0.0410917	3.23452	0.00121846	0.0181368
1253	MSTRG.2502	16508.5	0.165242	0.0511037	3.23347	0.00122296	0.0181893
1254	MSTRG.7867	948.436	-0.218907	0.0677077	-3.23311	0.00122449	0.0181976
1255	MSTRG.19839	3040.84	-0.109761	0.0339556	-3.23248	0.00122721	0.0182234
1256	MSTRG.11901	792.112	-0.238612	0.0738264	-3.23207	0.00122898	0.0182352
1257	MSTRG.6919	1875.79	-0.197159	0.0610357	-3.23022	0.00123693	0.0183386
1258	MSTRG.22387	341.529	0.366524	0.113476	3.22996	0.00123809	0.0183412
1259	MSTRG.16318	878.233	0.2458	0.0761512	3.22779	0.00124752	0.0184662
1260	MSTRG.4284	5448.63	0.117461	0.0363957	3.22735	0.00124944	0.01848
1261	MSTRG.9866	692.336	0.203743	0.0631762	3.22499	0.00125975	0.0186178
1262	MSTRG.20843	240.648	-0.393309	0.122021	-3.2233	0.00126722	0.0187134
1263	MSTRG.14623	887.788	0.169424	0.0525743	3.22256	0.00127052	0.0187472
1264	MSTRG.11170	12.9965	-1.27493	0.39569	-3.22205	0.00127276	0.0187655
1265	MSTRG.4597	5306.9	0.188933	0.0586509	3.22131	0.00127605	0.0187991
1266	MSTRG.18508	2049.27	0.135957	0.0422195	3.22025	0.0012808	0.0188542
1267	MSTRG.13687	294.747	0.33647	0.104553	3.21816	0.00129014	0.0189767
1268	MSTRG.285	30980.6	0.190513	0.0592063	3.21778	0.00129185	0.0189868
1269	MSTRG.9800	761.366	-0.235355	0.0731909	-3.21563	0.00130159	0.0191149
1270	MSTRG.4758	6.87442	-2.60436	0.810481	-3.21335	0.00131196	0.0192369
1271	MSTRG.8653	446.563	0.228916	0.0712371	3.21344	0.00131156	0.0192369
1272	MSTRG.22020	885.948	-0.162565	0.0505964	-3.21297	0.00131368	0.0192471
1273	MSTRG.1752	118.26	0.378214	0.117842	3.2095	0.00132965	0.0194656
1274	MSTRG.23588	63.0428	-0.574624	0.179202	-3.20657	0.00134329	0.01965
1275	MSTRG.23372	866.958	0.18525	0.0577988	3.20508	0.00135024	0.0197361
1276	MSTRG.8011	840.978	-0.193044	0.0603313	-3.19973	0.00137558	0.0200908
1277	MSTRG.12275	74.3662	0.611494	0.191408	3.19471	0.00139971	0.0203954
1278	MSTRG.19097	77.1467	0.440806	0.137974	3.19484	0.00139908	0.0203954
1279	MSTRG.4458	56.7255	-0.811933	0.254122	-3.19505	0.00139808	0.0203954
1280	MSTRG.4926	1412.9	0.293733	0.0920326	3.19162	0.00141476	0.0205985
1281	MSTRG.9476	2675.62	0.143024	0.0448612	3.18813	0.00143194	0.0208324
1282	MSTRG.2683	15.4391	-1.03175	0.32371	-3.18726	0.00143628	0.0208468
1283	MSTRG.4614	147.015	-1.28164	0.402078	-3.18755	0.00143482	0.0208468
1284	MSTRG.9807	114.443	-0.432555	0.135714	-3.18726	0.00143628	0.0208468
1285	MSTRG.17620	338.376	0.52716	0.165524	3.1848	0.00144853	0.0210082
1286	MSTRG.1103	601.942	-0.2404	0.0755678	-3.18126	0.00146637	0.0212505
1287	MSTRG.2661	7085.33	-0.155779	0.049017	-3.17805	0.00148267	0.02147
1288	MSTRG.8905	7518.92	0.11939	0.0375809	3.17689	0.00148864	0.0215397
1289	MSTRG.1676	65.9991	-0.851326	0.268059	-3.1759	0.00149375	0.0215801
1290	MSTRG.5245	6002.51	0.123562	0.0389037	3.17609	0.00149273	0.0215801
1291	MSTRG.15836	428.234	0.232011	0.0731315	3.17252	0.00151121	0.021805
1292	MSTRG.16345	166.263	0.407061	0.12833	3.17199	0.00151399	0.021805
1293	MSTRG.18359	744.188	0.162183	0.0511275	3.17212	0.00151329	0.021805
1294	MSTRG.20336	63.1848	-0.528117	0.166486	-3.17214	0.00151322	0.021805
1295	MSTRG.22963	919.39	0.210729	0.066457	3.17091	0.0015196	0.0218689
1296	MSTRG.22735	1024.41	0.165437	0.052184	3.17026	0.00152303	0.0219013
1297	MSTRG.22464	25518	0.11489	0.0362461	3.16973	0.0015258	0.0219242
1298	MSTRG.7197	1366.74	0.13422	0.0423598	3.16856	0.00153195	0.0219957
1299	MSTRG.18823	531.191	0.288359	0.0910227	3.16799	0.00153494	0.0220217
1300	MSTRG.16447	677.366	-0.24949	0.0787869	-3.16665	0.00154208	0.0221071
1301	MSTRG.9685	7441.93	0.52263	0.165215	3.16333	0.00155974	0.022343
1302	MSTRG.17892	2908.83	0.148774	0.0470465	3.16228	0.00156538	0.0224067
1303	MSTRG.12606	1190.01	0.176548	0.0558575	3.16069	0.00157394	0.022512
1304	MSTRG.288	1001.59	0.226026	0.0715774	3.15778	0.00158977	0.0227209
1305	MSTRG.5549	140.421	0.345812	0.10953	3.15723	0.00159277	0.0227464
1306	MSTRG.15194	1043.5	0.17036	0.0540052	3.15451	0.00160765	0.0229238
1307	MSTRG.22132	298.615	-0.240883	0.0763585	-3.15463	0.00160703	0.0229238
1308	MSTRG.4711	22.0802	0.844489	0.267833	3.15304	0.00161579	0.0230222
1309	MSTRG.22591	959.355	0.155306	0.0492677	3.15228	0.00162002	0.0230649
1310	MSTRG.2892	14.3859	1.88808	0.600001	3.14679	0.00165074	0.0234844
1311	MSTRG.17522	763.598	0.14877	0.0472873	3.14608	0.00165475	0.0235234
1312	MSTRG.18353	12.6059	-1.13212	0.35994	-3.14529	0.00165925	0.0235694
1313	MSTRG.7711	518.004	0.219047	0.0696893	3.14319	0.00167118	0.0237208
1314	MSTRG.21067	403.145	0.239024	0.0760683	3.14222	0.0016767	0.0237789
1315	MSTRG.514	1318.43	0.13893	0.0442168	3.14203	0.00167782	0.0237789
1316	MSTRG.23624	18.6036	-6.16606	1.96273	-3.14158	0.00168041	0.0237975
1317	MSTRG.1808	422.597	-0.212204	0.0675573	-3.1411	0.00168316	0.0238184
1318	MSTRG.8441	1131.42	0.121473	0.0386826	3.14024	0.00168812	0.0238704
1319	MSTRG.15945	70483.2	0.135477	0.0431681	3.13835	0.00169899	0.024006
1320	MSTRG.1116	281.661	-0.272685	0.0869128	-3.13746	0.0017042	0.0240431
1321	MSTRG.20506	387.408	0.307144	0.0978915	3.1376	0.00170339	0.0240431
1322	MSTRG.9630	1294.48	-0.205209	0.0654116	-3.1372	0.00170568	0.0240458
1323	MSTRG.21026	73.2838	0.453116	0.144522	3.13527	0.00171695	0.0241864
1324	MSTRG.7412	1640.22	0.222233	0.0708888	3.13495	0.00171883	0.0241946
1325	MSTRG.10053	376.907	0.246703	0.078745	3.13294	0.00173067	0.0243429
1326	MSTRG.18918	424.054	0.220724	0.0704661	3.13234	0.0017342	0.0243558
1327	MSTRG.249	23.8723	-0.921829	0.294274	-3.13255	0.00173295	0.0243558
1328	MSTRG.22281	377.015	0.245719	0.0784987	3.13023	0.00174672	0.0245132
1329	MSTRG.23259	11292.5	0.15742	0.0503394	3.12718	0.00176494	0.0247503
1330	MSTRG.16610	243.417	0.296841	0.0949416	3.12656	0.00176863	0.0247834
1331	MSTRG.4173	2040.49	0.15046	0.0481303	3.1261	0.00177139	0.0248035
1332	MSTRG.21393	11613.1	0.206307	0.0660246	3.1247	0.00177984	0.0248921
1333	MSTRG.5991	479.871	-0.219386	0.0702123	-3.12461	0.00178039	0.0248921
1334	MSTRG.4213	637.972	-0.215996	0.0691378	-3.12414	0.00178324	0.0249132
1335	MSTRG.11732	608.831	0.207197	0.0663357	3.12346	0.00178738	0.0249524
1336	MSTRG.14655	801.868	0.155396	0.0497941	3.12077	0.0018038	0.0251628
1337	MSTRG.21898	650.113	-0.167857	0.0538111	-3.11938	0.00181231	0.0252626
1338	MSTRG.20263	619.723	0.210652	0.0675388	3.11898	0.00181479	0.0252782
1339	MSTRG.21470	2525.37	-0.109891	0.0352463	-3.1178	0.00182209	0.025361
1340	MSTRG.14071	2805.87	-0.194927	0.0625625	-3.11572	0.00183494	0.0255018
1341	MSTRG.21191	612.777	-0.273582	0.0878056	-3.11576	0.00183469	0.0255018
1342	MSTRG.14166	774.681	-0.264492	0.0849617	-3.11307	0.00185151	0.0256747
1343	MSTRG.22784	95.7799	0.573907	0.18433	3.11348	0.00184897	0.0256747
1344	MSTRG.2579	99.5511	-0.592871	0.19044	-3.11316	0.00185097	0.0256747
1345	MSTRG.22479	885.637	0.210829	0.0677824	3.11038	0.00186848	0.0258907
1346	MSTRG.18301	868.465	-0.355875	0.114512	-3.10776	0.00188513	0.0261022
1347	MSTRG.4241	1014.69	-0.134471	0.0433011	-3.1055	0.00189959	0.0262828
1348	MSTRG.2000	19.1635	-1.00182	0.322787	-3.10366	0.00191143	0.0264203
1349	MSTRG.684	9553.44	0.214976	0.0692685	3.10352	0.00191236	0.0264203
1350	MSTRG.22096	520.057	0.185631	0.0598431	3.10197	0.0019224	0.0265393
1351	MSTRG.7866	287.808	-0.262843	0.0847474	-3.10149	0.00192548	0.0265622
1352	MSTRG.6871	288.154	0.229669	0.0740949	3.09966	0.00193743	0.0267074
1353	MSTRG.814	532.469	-0.201795	0.0651111	-3.09924	0.00194015	0.0267251
1354	MSTRG.3324	1730.12	0.158872	0.0512828	3.09796	0.0019486	0.0268216
1355	MSTRG.12952	2202.14	0.128548	0.0415019	3.09739	0.00195234	0.0268533
1356	MSTRG.12299	69.9307	0.469961	0.151884	3.09421	0.00197339	0.0271229
1357	MSTRG.2854	88.5532	-0.45555	0.14726	-3.09351	0.00197806	0.027167
1358	MSTRG.3150	5033.28	0.11026	0.0356565	3.09228	0.00198624	0.0272562
1359	MSTRG.3452	563.178	-0.165794	0.0536187	-3.0921	0.00198748	0.0272562
1360	MSTRG.11047	895.288	0.223519	0.0723017	3.09148	0.00199163	0.0272931
1361	MSTRG.14164	173.357	-0.400521	0.129589	-3.0907	0.00199687	0.0273448
1362	MSTRG.2114	40.1976	0.675605	0.218616	3.09038	0.00199902	0.0273463
1363	MSTRG.9269	12.434	1.16525	0.377073	3.09025	0.00199991	0.0273463
1364	MSTRG.4420	270.141	-0.304412	0.0985209	-3.08982	0.00200279	0.0273655
1365	MSTRG.670	1227.44	0.1782	0.0576817	3.08936	0.00200586	0.0273875
1366	MSTRG.22936	129.208	-0.390625	0.126494	-3.08809	0.00201446	0.0274647
1367	MSTRG.572	74.2539	-0.468476	0.151698	-3.08822	0.00201362	0.0274647
1368	MSTRG.19733	2822.79	0.115653	0.0374876	3.08509	0.0020349	0.0277231
1369	MSTRG.19511	8100.05	0.124556	0.0403903	3.08381	0.00204365	0.0278017
1370	MSTRG.4535	8.91782	-2.80426	0.909303	-3.08396	0.00204263	0.0278017
1371	MSTRG.6594	275.636	-0.252913	0.0820252	-3.08335	0.00204681	0.0278244
1372	MSTRG.17797	471.301	0.35798	0.116114	3.08301	0.00204918	0.0278363
1373	MSTRG.15410	51.8243	0.634309	0.205796	3.08222	0.00205462	0.0278899
1374	MSTRG.20248	6758.23	0.130052	0.0422095	3.08111	0.00206232	0.0279741
1375	MSTRG.20444	980.96	-0.261687	0.084978	-3.07947	0.00207368	0.0281078
1376	MSTRG.7716	17.4177	-2.07094	0.672677	-3.07865	0.00207937	0.0281644
1377	MSTRG.21437	2201.17	-0.150883	0.0490645	-3.0752	0.00210365	0.0284725
1378	MSTRG.8444	238.753	-0.258988	0.084237	-3.07451	0.00210849	0.0285173
1379	MSTRG.21693	615.961	0.242409	0.0788604	3.0739	0.00211281	0.0285551
1380	MSTRG.17599	63.1356	-0.539915	0.175673	-3.0734	0.00211633	0.028582
1381	MSTRG.5412	269.263	-0.296526	0.096503	-3.07271	0.00212125	0.0286277
1382	MSTRG.11877	563.827	-0.213859	0.0696169	-3.07194	0.00212675	0.0286812
1383	MSTRG.16523	203.531	-0.490121	0.159571	-3.07149	0.00212995	0.0287036
1384	MSTRG.11082	45818.4	0.197797	0.0644088	3.07095	0.00213376	0.0287341
1385	MSTRG.15139	794.703	-0.206941	0.0674006	-3.07031	0.00213834	0.0287542
1386	MSTRG.9404	559.426	-0.335018	0.109108	-3.07053	0.0021368	0.0287542
1387	MSTRG.19616	1010.1	-0.17866	0.0581962	-3.06996	0.00214085	0.0287673
1388	MSTRG.10411	51.8166	0.535726	0.174595	3.06839	0.00215218	0.0288835
1389	MSTRG.7784	1233.26	-0.132712	0.0432521	-3.06833	0.0021526	0.0288835
1390	MSTRG.10182	3029.62	0.182397	0.0594607	3.06753	0.00215837	0.0289401
1391	MSTRG.6218	83.3066	0.399661	0.130375	3.06548	0.00217322	0.0291183
1392	MSTRG.17093	1819.67	0.128978	0.0420945	3.06402	0.00218385	0.0292397
1393	MSTRG.11416	460.021	0.26955	0.0880444	3.06152	0.00220217	0.029448
1394	MSTRG.2010	3382.87	-0.154096	0.0503376	-3.06125	0.00220414	0.029448
1395	MSTRG.242	22.3212	0.799131	0.261035	3.06139	0.0022031	0.029448
1396	MSTRG.20322	90.0218	0.514219	0.168132	3.05842	0.00222511	0.0296856
1397	MSTRG.20499	301.024	-0.334258	0.109287	-3.05853	0.00222427	0.0296856
1398	MSTRG.13390	98.3104	-0.411044	0.13444	-3.05746	0.00223221	0.0297378
1399	MSTRG.5127	110.519	0.405194	0.132518	3.05766	0.00223072	0.0297378
1400	MSTRG.20326	48.9489	-0.550474	0.180243	-3.05406	0.00225766	0.0300554
1401	MSTRG.216	5077.23	0.154366	0.05058	3.05191	0.0022739	0.03025
1402	MSTRG.14490	5067.18	-0.163581	0.0536588	-3.04854	0.00229953	0.0305691
1403	MSTRG.449	2367.27	0.130651	0.0428838	3.04663	0.00231422	0.0307206
1404	MSTRG.7011	3474.51	-0.113628	0.037294	-3.04681	0.00231282	0.0307206
1405	MSTRG.20686	5237.57	-0.133612	0.0438663	-3.04589	0.00231995	0.0307748
1406	MSTRG.12776	349.901	0.230158	0.0755904	3.04481	0.00232831	0.0308418
1407	MSTRG.4418	1153.9	0.165132	0.054233	3.04486	0.00232791	0.0308418
1408	MSTRG.14845	1072.54	0.20032	0.0658189	3.0435	0.00233847	0.0309544
1409	MSTRG.15192	115.996	0.38077	0.125136	3.04284	0.00234356	0.0309999
1410	MSTRG.11490	214.944	-0.345669	0.113611	-3.04257	0.00234567	0.0310058
1411	MSTRG.671	551.326	-0.241391	0.0793704	-3.04133	0.00235537	0.0311119
1412	MSTRG.23382	509.37	-0.231634	0.0761686	-3.04107	0.00235737	0.0311163
1413	MSTRG.11778	67.5446	-0.513927	0.169042	-3.04022	0.00236402	0.031182
1414	MSTRG.10597	158.206	0.353816	0.116468	3.03787	0.00238256	0.0313822
1415	MSTRG.15207	345.777	-0.239565	0.0788555	-3.03803	0.00238134	0.0313822
1416	MSTRG.7251	14.1729	-1.20373	0.39637	-3.03687	0.00239045	0.0314417
1417	MSTRG.9303	1486.1	0.126684	0.0417133	3.03701	0.0023894	0.0314417
1418	MSTRG.21129	10.0985	-1.48316	0.488536	-3.03594	0.00239791	0.031496
1419	MSTRG.7594	977.124	-0.19285	0.0635226	-3.03593	0.00239796	0.031496
1420	MSTRG.18583	398.464	0.217871	0.0717809	3.03522	0.00240358	0.0315476
1421	MSTRG.17975	13588.6	0.108151	0.035641	3.03445	0.00240972	0.031606
1422	MSTRG.22666	1061.92	0.177976	0.0587027	3.03182	0.00243087	0.0318609
1423	MSTRG.10898	1206.37	0.208093	0.0687069	3.0287	0.00245605	0.0321683
1424	MSTRG.7801	148.111	-0.313355	0.103558	-3.02588	0.00247911	0.0324476
1425	MSTRG.21235	3177.09	0.186463	0.0616664	3.02374	0.00249667	0.0326546
1426	MSTRG.3720	948.909	-0.147031	0.0486352	-3.02315	0.00250161	0.0326963
1427	MSTRG.20315	639.765	-0.226981	0.0750986	-3.02244	0.00250743	0.0327494
1428	MSTRG.21224	10759.7	0.107145	0.0354901	3.01901	0.00253603	0.0330998
1429	MSTRG.11666	3123.34	0.251822	0.0834305	3.01835	0.00254154	0.0331485
1430	MSTRG.926	14.0077	-1.32267	0.438279	-3.01787	0.0025456	0.0331782
1431	MSTRG.13159	259.57	-0.25459	0.0843889	-3.01687	0.00255403	0.0332581
1432	MSTRG.4350	69.3861	-0.776615	0.257437	-3.01672	0.0025553	0.0332581
1433	MSTRG.21132	422.58	0.196927	0.0653133	3.01512	0.0025688	0.0334105
1434	MSTRG.1885	1303.1	0.136177	0.0451774	3.01427	0.00257601	0.0334732
1435	MSTRG.5471	70.9306	-0.604867	0.200677	-3.01413	0.00257721	0.0334732
1436	MSTRG.8644	1196.2	0.136104	0.0451671	3.01334	0.00258387	0.0335363
1437	MSTRG.8705	22.5476	-0.959235	0.318651	-3.0103	0.00260992	0.0338509
1438	MSTRG.7077	304.939	0.241865	0.0803672	3.0095	0.00261679	0.0339164
1439	MSTRG.5532	2117.58	-0.113163	0.0376075	-3.00906	0.00262056	0.0339417
1440	MSTRG.21356	290.814	0.354557	0.117841	3.00877	0.00262307	0.0339506
1441	MSTRG.16469	1974.03	0.160034	0.0532096	3.00762	0.00263304	0.034056
1442	MSTRG.20806	26.8876	0.990902	0.329527	3.00705	0.002638	0.0340919
1443	MSTRG.4018	153.404	-0.321098	0.106788	-3.00688	0.00263946	0.0340919
1444	MSTRG.17679	316.292	0.228728	0.0760839	3.00627	0.00264477	0.0341367
1445	MSTRG.12028	744.296	-0.18283	0.0608274	-3.00572	0.0026495	0.0341742
1446	MSTRG.5950	41.8623	0.597995	0.198973	3.00541	0.00265221	0.0341855
1447	MSTRG.21869	3815.6	0.150174	0.0499788	3.00475	0.00265796	0.0342359
1448	MSTRG.11012	1329.18	0.24639	0.0820178	3.0041	0.00266364	0.0342854
1449	MSTRG.12211	75.0505	-0.496186	0.165271	-3.00225	0.00267991	0.0344711
1450	MSTRG.9918	1297.01	0.144068	0.0479938	3.0018	0.00268389	0.0344984
1451	MSTRG.16091	123.085	0.393592	0.131262	2.99853	0.00271284	0.0348425
1452	MSTRG.19825	274.257	-0.28323	0.0944619	-2.99836	0.00271439	0.0348425
1453	MSTRG.21225	1166.25	0.127498	0.0425263	2.99808	0.00271683	0.0348497
1454	MSTRG.6481	780.617	0.205656	0.0686517	2.99564	0.00273868	0.0351059
1455	MSTRG.2095	544.322	0.251538	0.0840361	2.99321	0.00276056	0.0353621
1456	MSTRG.16620	543.496	0.221341	0.073986	2.99165	0.0027747	0.0354968
1457	MSTRG.5424	27.1234	-0.788206	0.26347	-2.99163	0.00277488	0.0354968
1458	MSTRG.20122	334.519	-0.43067	0.14399	-2.99097	0.00278096	0.0355502
1459	MSTRG.5898	795.019	-0.203184	0.0679389	-2.99069	0.00278348	0.0355581
1460	MSTRG.21609	600.205	0.210795	0.0704948	2.99023	0.0027877	0.0355875
1461	MSTRG.12503	1465.43	0.141204	0.0472253	2.99001	0.00278968	0.0355885
1462	MSTRG.11614	408.877	0.293974	0.0983548	2.98892	0.00279968	0.0356916
1463	MSTRG.2985	1390.22	0.120887	0.0404537	2.98828	0.00280553	0.0357417
1464	MSTRG.6689	1363.76	0.196069	0.0656319	2.9874	0.00281359	0.0358199
1465	MSTRG.18131	3831.31	-0.148934	0.0499176	-2.9836	0.00284877	0.0362432
1466	MSTRG.27	617.906	-0.211053	0.0707486	-2.98314	0.00285308	0.0362732
1467	MSTRG.2398	4559.45	0.0858253	0.0287756	2.98257	0.00285837	0.0362959
1468	MSTRG.7624	447.759	0.20252	0.0679022	2.98253	0.00285876	0.0362959
1469	MSTRG.6831	619.834	-0.157322	0.0527599	-2.98185	0.00286515	0.0363523
1470	MSTRG.13810	1840.69	0.101146	0.0339325	2.98079	0.00287504	0.0364525
1471	MSTRG.2780	17824.8	0.0835898	0.0280447	2.98059	0.00287695	0.0364525
1472	MSTRG.16740	1305.12	0.17722	0.0594929	2.97885	0.00289333	0.0366351
1473	MSTRG.13897	173.883	-0.312633	0.104994	-2.97762	0.00290492	0.0367569
1474	MSTRG.46	1568.78	0.125724	0.0422492	2.97578	0.00292244	0.0369535
1475	MSTRG.2003	533.187	-0.261836	0.0880111	-2.97503	0.00292958	0.0370187
1476	MSTRG.11500	513.72	-0.176058	0.0592027	-2.97381	0.00294127	0.0371413
1477	MSTRG.17039	224.17	0.287706	0.0967874	2.97255	0.00295333	0.0372655
1478	MSTRG.7165	1952.2	-0.145086	0.0488115	-2.97237	0.0029551	0.0372655
1479	MSTRG.7177	1823.98	-0.127746	0.0429826	-2.97205	0.00295822	0.0372796
1480	MSTRG.13930	345.407	-0.2346	0.0789585	-2.97118	0.00296659	0.0373598
1481	MSTRG.10482	2128.75	0.142312	0.0479112	2.97033	0.00297478	0.0374377
1482	MSTRG.23383	598.149	-0.179572	0.0604644	-2.96989	0.00297907	0.0374663
1483	MSTRG.18973	3099.92	0.126731	0.0426758	2.96962	0.00298173	0.0374746
1484	MSTRG.9819	97.5696	-0.398015	0.134078	-2.96852	0.00299237	0.037583
1485	MSTRG.7328	1125.33	0.213595	0.0720292	2.96539	0.00302299	0.037942
1486	MSTRG.12531	349.405	-0.223395	0.0753535	-2.96462	0.00303055	0.0380022
1487	MSTRG.20512	110.691	0.384845	0.129818	2.96449	0.00303186	0.0380022
1488	MSTRG.12457	1678.42	0.132905	0.0448661	2.96226	0.00305394	0.0382532
1489	MSTRG.22276	3659.29	0.105271	0.0355419	2.96188	0.00305772	0.0382748
1490	MSTRG.6574	369.781	0.226486	0.0764795	2.96139	0.00306253	0.0383093
1491	MSTRG.15359	167.334	-0.413885	0.139796	-2.96063	0.00307009	0.0383525
1492	MSTRG.16791	950.296	0.1398	0.0472189	2.96067	0.0030697	0.0383525
1493	MSTRG.21020	827.478	0.206788	0.0699184	2.95756	0.00310089	0.0387018
1494	MSTRG.8234	4332.79	0.103138	0.0348744	2.95742	0.00310221	0.0387018
1495	MSTRG.5259	221.801	-0.360107	0.121774	-2.95716	0.00310486	0.038709
1496	MSTRG.18597	1991.69	-0.191283	0.0647113	-2.95594	0.00311719	0.0388368
1497	MSTRG.14425	719.237	0.16273	0.0550606	2.95547	0.00312189	0.0388694
1498	MSTRG.12079	92.8447	-0.420285	0.142242	-2.95473	0.00312945	0.0389376
1499	MSTRG.2188	1955.72	0.162254	0.0549277	2.95395	0.00313733	0.0389836
1500	MSTRG.4635	1632.43	0.133069	0.0450452	2.95413	0.00313554	0.0389836
1501	MSTRG.23167	664.961	-0.176957	0.0599569	-2.95141	0.0031633	0.039254
1502	MSTRG.9617	289.958	-0.30465	0.103221	-2.95144	0.00316298	0.039254
1503	MSTRG.9761	586.025	0.239381	0.0811547	2.94969	0.00318093	0.0394465
1504	MSTRG.14507	151.478	0.329156	0.111641	2.94835	0.00319471	0.039591
1505	MSTRG.22634	94.4823	-0.381026	0.129248	-2.94802	0.00319813	0.0396071
1506	MSTRG.19469	1058.72	0.155405	0.0527209	2.94769	0.00320154	0.039623
1507	MSTRG.12264	392.993	0.248223	0.084278	2.94529	0.00322652	0.0399022
1508	MSTRG.8736	341.294	-0.267147	0.0907085	-2.94511	0.00322838	0.0399022
1509	MSTRG.16211	333.052	0.252649	0.085829	2.94364	0.00324381	0.0400399
1510	MSTRG.3771	86.0918	0.700863	0.238094	2.94364	0.00324372	0.0400399
1511	MSTRG.20154	4976.27	0.139427	0.0473728	2.94319	0.00324852	0.0400485
1512	MSTRG.7930	11.5015	0.955197	0.324548	2.94316	0.0032488	0.0400485
1513	MSTRG.5086	914.894	-0.162456	0.055288	-2.93836	0.00329956	0.0406473
1514	MSTRG.12631	7632.65	-0.0937346	0.0319032	-2.93809	0.0033024	0.0406555
1515	MSTRG.17809	497.827	0.189193	0.0644109	2.93728	0.00331107	0.0407353
1516	MSTRG.7200	1572.12	0.110891	0.0377665	2.93622	0.00332243	0.0408482
1517	MSTRG.11465	18.3105	-0.957525	0.326367	-2.93389	0.00334747	0.0411289
1518	MSTRG.5746	6020.53	-0.178531	0.0608636	-2.9333	0.00335376	0.0411791
1519	MSTRG.17415	36.2311	-0.685328	0.233748	-2.93191	0.00336884	0.041337
1520	MSTRG.10153	9.56728	-1.10854	0.378133	-2.93161	0.00337215	0.0413504
1521	MSTRG.12713	54.7624	-0.538204	0.183625	-2.931	0.00337872	0.0414038
1522	MSTRG.19574	1578.09	-0.249934	0.0853271	-2.92913	0.00339917	0.0416271
1523	MSTRG.13098	2741.43	-0.121028	0.0413237	-2.92877	0.00340303	0.0416469
1524	MSTRG.15120	3254.25	0.113997	0.0389285	2.92837	0.0034074	0.0416673
1525	MSTRG.21791	615.471	0.178808	0.061064	2.92821	0.00340917	0.0416673
1526	MSTRG.14898	35.6629	0.613476	0.209547	2.92763	0.00341561	0.0417187
1527	MSTRG.23062	114.911	0.320875	0.109618	2.9272	0.0034203	0.0417214
1528	MSTRG.6562	782.196	-0.170732	0.0583252	-2.92725	0.00341977	0.0417214
1529	MSTRG.17169	7389.63	-0.138462	0.047323	-2.92589	0.00343468	0.0418695
1530	MSTRG.15442	1623.58	0.234544	0.0802068	2.92424	0.00345304	0.0420657
1531	MSTRG.18163	54.1317	-0.550289	0.188317	-2.92215	0.00347624	0.0423166
1532	MSTRG.8323	791.615	0.284963	0.0975242	2.92198	0.00347817	0.0423166
1533	MSTRG.5659	7.09917	-2.16644	0.741649	-2.92111	0.00348787	0.0424069
1534	MSTRG.21266	81.8305	-0.459012	0.157189	-2.92013	0.00349888	0.0425132
1535	MSTRG.4624	9226.58	0.0970927	0.0332751	2.91788	0.00352421	0.0427931
1536	MSTRG.15763	1075.79	-0.16417	0.0562718	-2.91745	0.00352911	0.0428246
1537	MSTRG.11644	605.397	-0.270127	0.0926171	-2.9166	0.00353874	0.0429136
1538	MSTRG.8515	1924.2	0.115843	0.0397297	2.91579	0.00354787	0.0429963
1539	MSTRG.13022	499.143	-0.176013	0.0603872	-2.91474	0.00355981	0.043113
1540	MSTRG.13985	288.639	-0.237264	0.0815569	-2.90919	0.00362367	0.043817
1541	MSTRG.8503	4602.07	0.0937291	0.0322195	2.90908	0.00362499	0.043817
1542	MSTRG.9860	2835.98	0.10045	0.0345269	2.90933	0.00362205	0.043817
1543	MSTRG.23404	362.58	0.202302	0.0695495	2.90875	0.00362879	0.0438175
1544	MSTRG.7333	176.646	-0.29539	0.101555	-2.90867	0.00362973	0.0438175
1545	MSTRG.18631	3177.15	-0.153963	0.0529754	-2.9063	0.00365726	0.0441208
1546	MSTRG.23084	1000.32	0.172449	0.0593444	2.9059	0.00366195	0.0441208
1547	MSTRG.5998	16548.4	0.104015	0.035793	2.90601	0.00366064	0.0441208
1548	MSTRG.5299	1079.59	-0.160293	0.0552418	-2.90165	0.00371197	0.0446947
1549	MSTRG.10744	91.4179	-0.60501	0.2087	-2.89895	0.00374417	0.0450532
1550	MSTRG.7425	1766.08	-0.143772	0.0496439	-2.89606	0.0037788	0.0454407
1551	MSTRG.10996	938.659	0.207108	0.0715478	2.89468	0.0037954	0.0456108
1552	MSTRG.15777	35294.4	0.112133	0.0387622	2.89284	0.00381771	0.0458199
1553	MSTRG.7435	1776.49	0.133331	0.0460895	2.89286	0.00381751	0.0458199
1554	MSTRG.11808	1379.08	0.1334	0.0461883	2.88817	0.00387496	0.0463876
1555	MSTRG.21315	4507.63	-0.167742	0.058079	-2.88817	0.0038749	0.0463876
1556	MSTRG.21760	65.0304	0.57454	0.198915	2.88838	0.00387235	0.0463876
1557	MSTRG.7620	18645.6	0.146698	0.0507822	2.88876	0.00386764	0.0463876
1558	MSTRG.9707	480.591	0.196123	0.067916	2.88773	0.00388027	0.0464214
1559	MSTRG.2670	589.152	-0.241138	0.0835327	-2.88675	0.00389248	0.0465375
1560	MSTRG.13194	394.708	0.176076	0.0610721	2.88308	0.00393813	0.0470532
1561	MSTRG.5772	5023.67	-0.112608	0.039065	-2.88258	0.0039443	0.0470967
1562	MSTRG.11856	413.006	0.199413	0.0692548	2.87941	0.00398414	0.047542
1563	MSTRG.17226	765.192	0.202691	0.0704281	2.87799	0.0040022	0.047727
1564	MSTRG.21599	1604.1	0.246533	0.0856927	2.87694	0.00401552	0.0478552
1565	MSTRG.16906	16691.6	0.181016	0.0629289	2.87651	0.00402099	0.0478634
1566	MSTRG.6902	206.739	-0.310456	0.107929	-2.87648	0.00402134	0.0478634
1567	MSTRG.20239	382.876	0.19516	0.0678734	2.87535	0.00403582	0.0480051
1568	MSTRG.16158	1095.26	-0.123547	0.0429882	-2.87397	0.00405346	0.0481843
1569	MSTRG.13485	8.64552	-1.67304	0.582206	-2.87362	0.00405791	0.0482065
1570	MSTRG.20623	22.2079	0.951728	0.33122	2.8734	0.00406075	0.0482089
1571	MSTRG.6777	606.644	0.181743	0.0632543	2.87321	0.00406329	0.0482089
1572	MSTRG.19765	759.303	0.21513	0.0748873	2.87272	0.00406959	0.0482529
1573	MSTRG.17040	2702.65	0.102135	0.035576	2.87091	0.00409298	0.0484995
1574	MSTRG.19688	6755.45	0.0905958	0.0316055	2.86645	0.00415099	0.0491556
1575	MSTRG.20601	3566.19	0.109978	0.038376	2.86581	0.00415948	0.0492249
1576	MSTRG.6876	67.3283	0.611113	0.213296	2.8651	0.00416882	0.0493042
1577	MSTRG.16337	1001.98	0.191736	0.0669835	2.86244	0.00420388	0.0496873
1578	MSTRG.3153	309.245	-0.400737	0.14008	-2.86078	0.00422603	0.0498905
1579	MSTRG.4325	1085	-0.158907	0.0555472	-2.86075	0.00422642	0.0498905
1580	MSTRG.9372	23.4975	-0.879991	0.307686	-2.86003	0.00423604	0.0499724
1581	MSTRG.5301	9346.34	0.121249	0.0424091	2.85903	0.00424933	0.0500975
1582	MSTRG.3071	56.7858	-0.487149	0.170715	-2.85358	0.00432299	0.0509337
1583	MSTRG.740	119.844	0.338403	0.118646	2.8522	0.00434174	0.0511223
1584	MSTRG.13609	539.572	0.244792	0.0858718	2.85066	0.00436284	0.0513383
1585	MSTRG.5456	1654.9	-0.207442	0.0727765	-2.8504	0.0043664	0.0513479
1586	MSTRG.3588	266.937	0.230469	0.0808695	2.84989	0.00437347	0.0513986
1587	MSTRG.2507	226.583	-0.246085	0.0864234	-2.84744	0.00440728	0.0517633
1588	MSTRG.8909	666.926	0.156451	0.0549489	2.84722	0.00441035	0.0517668
1589	MSTRG.5247	111.764	0.457447	0.160728	2.8461	0.00442585	0.0519161
1590	MSTRG.20375	12850	0.117284	0.0412176	2.84548	0.00443439	0.0519835
1591	MSTRG.20321	444.151	0.19437	0.068315	2.84521	0.00443825	0.0519962
1592	MSTRG.5337	507.299	0.166808	0.0586372	2.84474	0.00444472	0.0520392
1593	MSTRG.5284	1390.82	0.141985	0.0499207	2.84422	0.00445207	0.0520926
1594	MSTRG.18185	624.596	-0.197161	0.0693335	-2.84366	0.0044599	0.0521515
1595	MSTRG.6984	29.3114	-0.813188	0.286107	-2.84225	0.00447958	0.0523488
1596	MSTRG.5649	155.508	-0.395482	0.139197	-2.84117	0.00449477	0.0524934
1597	MSTRG.21105	588.619	-0.184507	0.0649487	-2.84082	0.0044998	0.0525192
1598	MSTRG.3132	1490.74	0.136904	0.0482312	2.83849	0.0045328	0.0528713
1599	MSTRG.18357	449.995	0.190938	0.0672806	2.83793	0.00454065	0.0529298
1600	MSTRG.11101	1420.87	0.138595	0.0488627	2.83643	0.00456214	0.053147
1601	MSTRG.8804	9136.21	0.2231	0.0786632	2.83615	0.00456617	0.0531608
1602	MSTRG.312	2734.03	-0.111631	0.0393691	-2.8355	0.00457543	0.0532354
1603	MSTRG.5271	18246.4	0.0938817	0.0331187	2.8347	0.00458683	0.0533347
1604	MSTRG.545	4206.19	-0.0917528	0.0323741	-2.83414	0.00459487	0.053395
1605	MSTRG.11448	262.331	-0.269515	0.0951567	-2.83233	0.00462099	0.0536002
1606	MSTRG.17516	946.409	0.139883	0.049387	2.83238	0.0046203	0.0536002
1607	MSTRG.8207	4196.18	0.114961	0.0405889	2.83232	0.00462115	0.0536002
1608	MSTRG.10871	311.495	0.212447	0.0750365	2.83125	0.00463665	0.0536798
1609	MSTRG.1101	99.8017	-0.357287	0.126177	-2.83163	0.0046312	0.0536798
1610	MSTRG.5373	66.2236	-0.532141	0.187941	-2.83143	0.00463402	0.0536798
1611	MSTRG.21870	1637.27	-0.115254	0.0407304	-2.82969	0.00465935	0.0539092
1612	MSTRG.22808	18.195	-1.10161	0.389662	-2.82709	0.0046973	0.0543145
1613	MSTRG.17273	60.0432	0.498035	0.176185	2.82678	0.00470191	0.0543342
1614	MSTRG.700	878.73	0.16416	0.0580959	2.82568	0.004718	0.0544864
1615	MSTRG.2590	1420.85	0.105997	0.0375303	2.82432	0.00473817	0.0546854
1616	MSTRG.12169	806.06	-0.168792	0.0597923	-2.82297	0.00475805	0.0548809
1617	MSTRG.4432	1252.72	0.142888	0.0506472	2.82124	0.0047838	0.0551167
1618	MSTRG.7257	236.94	0.354969	0.125822	2.8212	0.0047844	0.0551167
1619	MSTRG.20161	1557.78	0.12528	0.044416	2.82061	0.00479328	0.0551745
1620	MSTRG.4176	1216.46	-0.127446	0.045186	-2.82047	0.00479534	0.0551745
1621	MSTRG.13892	150.158	0.310354	0.110072	2.81954	0.00480924	0.0552809
1622	MSTRG.14471	27397.5	0.181647	0.0644263	2.81946	0.00481051	0.0552809
1623	MSTRG.8361	513.428	-0.17286	0.0613255	-2.81874	0.00482129	0.0553706
1624	MSTRG.1010	571.723	-0.248935	0.0883566	-2.81739	0.00484164	0.0555174
1625	MSTRG.22786	970.651	0.165015	0.058572	2.81729	0.004843	0.0555174
1626	MSTRG.722	1438.11	0.136383	0.048407	2.81743	0.004841	0.0555174
1627	MSTRG.16977	6873.74	0.16244	0.0576684	2.81679	0.00485059	0.0555361
1628	MSTRG.6199	579.52	0.221579	0.0786608	2.81689	0.00484905	0.0555361
1629	MSTRG.11846	551.66	-0.257311	0.091407	-2.81501	0.00487761	0.0558112
1630	MSTRG.10582	490.769	-0.213595	0.0759469	-2.81242	0.00491699	0.0562274
1631	MSTRG.17623	387.864	-0.260589	0.0927339	-2.81007	0.00495306	0.0566051
1632	MSTRG.1732	1663.83	0.152132	0.054158	2.80904	0.00496888	0.0567467
1633	MSTRG.9241	548.844	-0.187117	0.0666163	-2.80887	0.00497154	0.0567467
1634	MSTRG.17691	1246.69	-0.160524	0.057172	-2.80774	0.00498906	0.0569119
1635	MSTRG.4204	951.113	0.149309	0.0531855	2.80732	0.00499553	0.0569509
1636	MSTRG.4956	11724.6	0.193447	0.0689223	2.80674	0.00500459	0.0570193
1637	MSTRG.21220	877.884	0.135113	0.0481435	2.80646	0.00500893	0.0570339
1638	MSTRG.12685	4541.62	0.107346	0.0382864	2.80378	0.00505076	0.0573799
1639	MSTRG.14552	872.109	0.163096	0.0581738	2.8036	0.0050536	0.0573799
1640	MSTRG.14571	37948.5	-0.110834	0.0395228	-2.80429	0.0050427	0.0573799
1641	MSTRG.19680	1238.19	0.139766	0.0498536	2.80353	0.0050547	0.0573799
1642	MSTRG.2253	2073.92	0.196516	0.070087	2.80389	0.00504903	0.0573799
1643	MSTRG.8279	2691.89	0.114484	0.0408418	2.80312	0.00506115	0.0574182
1644	MSTRG.21286	489.432	0.205692	0.0734065	2.8021	0.00507711	0.0575292
1645	MSTRG.2961	6574.67	0.0965547	0.0344572	2.80216	0.00507617	0.0575292
1646	MSTRG.22558	2196.03	0.116406	0.0415675	2.8004	0.00510395	0.0577983
1647	MSTRG.1850	1887.26	-0.124417	0.0444335	-2.80008	0.00510904	0.0578208
1648	MSTRG.18141	2038.21	0.094537	0.0338	2.79695	0.00515872	0.0583476
1649	MSTRG.5058	3669.25	0.130754	0.0467627	2.79612	0.00517203	0.0584627
1650	MSTRG.20942	222.203	0.262439	0.0938738	2.79566	0.00517946	0.0585113
1651	MSTRG.12256	789.576	0.214646	0.0768918	2.79153	0.00524593	0.0591905
1652	MSTRG.23667	9473.73	0.173654	0.0622057	2.7916	0.00524475	0.0591905
1653	SMESG000026577.1	9.25709	-1.43667	0.514722	-2.79115	0.00525213	0.0592246
1654	MSTRG.14467	478.095	0.183906	0.0659044	2.7905	0.00526265	0.0593074
1655	MSTRG.19966	15.5839	-1.51811	0.544109	-2.79008	0.00526949	0.0593486
1656	MSTRG.16915	1129.44	0.193513	0.0694005	2.78836	0.00529761	0.0596293
1657	MSTRG.14487	475.044	0.203617	0.0730443	2.78758	0.00531037	0.0597009
1658	MSTRG.2922	325.316	-0.354852	0.127291	-2.78772	0.00530802	0.0597009
1659	MSTRG.18987	1629.44	-0.187431	0.0672686	-2.78631	0.00533119	0.0598988
1660	MSTRG.20406	138.332	0.334006	0.119892	2.7859	0.005338	0.0599392
1661	MSTRG.5406	3166.82	0.161792	0.0580857	2.78541	0.00534599	0.0599928
1662	MSTRG.6905	4023.67	-0.168157	0.0604029	-2.78392	0.00537055	0.0602321
1663	MSTRG.1118	223.989	-0.406745	0.146116	-2.78372	0.00537394	0.0602335
1664	MSTRG.21728	833.242	0.141029	0.0506656	2.78353	0.00537713	0.0602335
1665	MSTRG.10558	872.755	0.150173	0.0539559	2.78326	0.00538156	0.0602469
1666	MSTRG.19552	712.931	0.139162	0.0500173	2.78227	0.00539797	0.0603944
1667	MSTRG.10395	11461.9	0.17892	0.0643175	2.78183	0.00540531	0.0604403
1668	MSTRG.11977	12.6543	-1.062	0.381959	-2.7804	0.00542921	0.0606348
1669	MSTRG.2027	545.246	0.171796	0.0617845	2.78057	0.00542641	0.0606348
1670	MSTRG.357	71.2305	-0.426372	0.153398	-2.77951	0.00544413	0.0607651
1671	MSTRG.4012	12.9798	-1.2186	0.438806	-2.77708	0.0054849	0.0611533
1672	MSTRG.5721	36.4188	0.689823	0.248401	2.77705	0.00548547	0.0611533
1673	MSTRG.7421	546.965	0.193142	0.0695755	2.776	0.00550315	0.0613137
1674	MSTRG.19937	419.307	-0.185696	0.0669156	-2.77507	0.00551894	0.061453
1675	MSTRG.16996	755.24	0.146366	0.0527604	2.77417	0.00553433	0.0615876
[truncated: 26,327 more rows]

## Sheet: myoD(RNAi) worm
	Unnamed: 0	baseMean	log2FoldChange	lfcSE	stat	pvalue	padj
[truncated: 28,003 more rows]

[truncated: 5 more sheets: myoD(RNAi) blastema, nkx(RNAi), hox1(RNAi), hox3a(RNAi), lox5b(RNAi)]
